# Supplementary material for: Epigenetic mechanisms of Strip2 in differentiation of pluripotent stem cells
Source: Cell Death Discov. 2022 Nov 5;8:447. doi: 10.1038/s41420-022-01237-5 (PMC9637104; doi:10.1038/s41420-022-01237-5)
Supplement: Supplementary file 10 — Table S1 [file 41420_2022_1237_MOESM10_ESM.xlsx]

## Sheet: ESCs
						Strip2_ESCs vs WT ESCs
T: Protein IDs	T: Protein names	T: Gene names	crapome	Mol. weight [kDa]	Strip2_ESCs_WT_D0	-log10 p-value Strip2_ESCs_WT_ESCs	q-value Strip2_ESCs_WT_ESCs	Difference Strip2_ESCs_WT_ESCs
A2ANY6;J3QMC5		Mdn1		630.33	+	1.40229	0.0457906	0.80923
F6WYM0;D3YYB1;D3Z3C0;E9Q3V6;P42208;F6UKN5;D3Z1S1	Septin-2	NEDD5		24.258	+	1.52646	0.0456648	-0.651211
Q8R0F5	RNA-binding motif protein, X-linked 2	Rbmx2		37.535	+	1.16105	0.0447127	2.05223
Q9CQK1	Zinc finger HIT domain-containing protein 3	Znhit3		17.067	+	1.20133	0.0439053	1.66961
E9Q784		Zc3h13		203.75	+	1.12633	0.0437833	2.97402
Q9QYB1	Chloride intracellular channel protein 4	Clic4		28.729	+	1.16187	0.0437486	-2.17561
Q60972	Histone-binding protein RBBP4	Rbbp4		47.655	+	1.32676	0.043662	1.0115
Q3ULA8;F6QN44;A0A0U1RPI9;A0A0J9YUI0		Zfp936		54.349	+	1.14939	0.0426873	2.63871
P68372;Q9D6F9	Tubulin beta-4B chain;Tubulin beta-4A chain	Tubb4b;Tubb4a	+	49.83	+	1.59553	0.0425674	-0.625773
Q99LL5;A0A1W2P7U7	Periodic tryptophan protein 1 homolog	Pwp1		55.586	+	1.91215	0.0424482	-0.461
A0A0B4J1E2;Q9CSN1	SNW domain-containing protein 1	Snw1		61.461	+	1.14873	0.0411921	2.8647
F2Z456;Q9DCN2;A0A0A0MQM3	NADH-cytochrome b5 reductase;NADH-cytochrome b5 reductase 3;NADH-cytochrome b5 reductase 3 membrane-bound form;NADH-cytochrome b5 reductase 3 soluble form	Cyb5r3		34.929	+	1.31374	0.0410398	-1.15059
P42125	Enoyl-CoA delta isomerase 1, mitochondrial	Eci1		32.25	+	1.48068	0.0409235	-0.765764
H9KV01;H9KV15;H9KV00;Q9QX47;H9KV02;F7CU80	Protein SON	Son		252.18	+	1.18654	0.0408986	2.30123
Q9D902;A0A087WSE8;A0A087WSS5;A0A087WQX6	General transcription factor IIE subunit 2	Gtf2e2		33.046	+	1.57333	0.0407803	0.673343
Q9DB29	Isoamyl acetate-hydrolyzing esterase 1 homolog	Iah1		27.974	+	1.47135	0.0407163	-0.79404
P46061	Ran GTPase-activating protein 1	Rangap1		63.53	+	1.4512	0.0406628	-0.829313
E9Q7G0;A0A1B0GSW3;A0A1B0GT61;F6ZQA3;A0A1B0GSH2;A0A1B0GT38		Numa1		235.63	+	1.81785	0.0406	-0.510743
Q9Z1N5;G3UXI6	Spliceosome RNA helicase Ddx39b	Ddx39b		49.035	+	1.39603	0.040546	0.933632
O54774	AP-3 complex subunit delta-1	Ap3d1		135.08	+	1.67873	0.0404843	-0.583684
Q9Z0N1;Q9Z0N2;A2AAW9	Eukaryotic translation initiation factor 2 subunit 3, X-linked;Eukaryotic translation initiation factor 2 subunit 3, Y-linked	Eif2s3x;Eif2s3y		51.065	+	1.8669	0.0404723	0.497487
P70279;A2ALA0	Surfeit locus protein 6	Surf6		41.234	+	1.47417	0.0403547	0.806311
A0A1B0GRI2;A2AHM2;A0A0U1RQ46;A2ARW5;F8VPV1;A0A087WRH0;Q6PEE4;Q3TPQ7;A2ARX0;J3QK55;F6R9A8;Q99LG7;A0A087WQ98;A2AQA0;D3YYR3;A2ARL4;J3KMG5;A0A087WRJ1;F8VPU8;A0A0J9YVH3;A2ANU7;A0A087WPI5;Q91VM8;Q8K0G9;L7N267;E9PZP6;Q3UQ14;G3X904		Zfp931;Gm14393;Zfp951;Zfp933;AW146154;Gm14443		66.112	+	1.31463	0.0403155	1.27371
O88554	Poly [ADP-ribose] polymerase 2	Parp2		63.396	+	1.14784	0.0403109	3.59031
B7FAV1;B7FAU9;Q8BTM8;F6XC15;Q8VHX6;F6Z2C0;J3JS91	Filamin-A	Flna		274.63	+	1.39894	0.0402537	-0.972162
Q9CY27;G3UWE1;Q52L67;Q3TAN8;A0A1D5RLB4;A0A1D5RLH3	Very-long-chain enoyl-CoA reductase	Tecr		36.09	+	1.55898	0.0401958	-0.712648
Q8CJF7;F6S6E4;F6SJR1	Protein ELYS	Ahctf1		247.64	+	1.81168	0.040193	0.523443
Q8VEK3;G3XA10	Heterogeneous nuclear ribonucleoprotein U	Hnrnpu;Gm28062	+	87.917	+	1.51402	0.0401353	0.763266
A2AH85;O08810;G3UZ34;G3UXK8	116 kDa U5 small nuclear ribonucleoprotein component	Eftud2		109.49	+	1.4286	0.0400769	0.90947
A0A0J9YUH8				8.8338	+	1.23366	0.0397313	1.88943
E9Q3X0;Q9EQK5;D3Z2N7	Major vault protein	Mvp		96.856	+	1.2085	0.0395509	-2.27777
Q91WM1;A2BH82	Spermatid perinuclear RNA-binding protein	Strbp		73.704	+	1.17844	0.0393273	2.97327
Q9JIF7	Coatomer subunit beta	Copb1		107.06	+	1.49529	0.0390361	-0.815688
Q3THW5;P0C0S6;Q8R029;Q3UA95	Histone H2A.V;Histone H2A.Z;Histone H2A	H2afv;H2afz	+	13.509	+	1.31004	0.0389697	1.36168
P43276	Histone H1.5	Hist1h1b		22.576	+	1.37412	0.038852	1.09566
Q6ZQL4	WD repeat-containing protein 43	Wdr43		75.38	+	1.2671	0.0383708	-1.70324
Q9D7Z3	Nucleolar protein 7	Nol7		28.97	+	1.41235	0.037878	1.01161
P14602;D3YZ06	Heat shock protein beta-1	Hspb1		23.014	+	1.53755	0.0374601	0.782294
Q9CWY6;Q8VC52;A0A1L1SVH5;S4R1Y2;T1ECW4;A0A1L1SRM3;Q9WVB0	RNA-binding protein with multiple splicing 2;RNA-binding protein with multiple splicing	Rbpms2;Rbpms		18.295	+	1.19613	0.0374427	2.95186
E9PV84;E9PXB1;Q3URR7	Zinc finger and SCAN domain-containing protein 10	Zscan10		61.588	+	1.47853	0.0373456	0.87403
P15105;D3YVK1;D3Z121	Glutamine synthetase	Glul		42.119	+	1.78191	0.0373272	-0.570319
O70551;F8WGJ7;Q9Z0G2;A0A0G2JDY2	SRSF protein kinase 1	Srpk1		73.088	+	1.77737	0.0372123	0.572666
D6REF7;Q8R0X7;D3YZT4;D3YY13;D3Z1Z3	Sphingosine-1-phosphate lyase 1	Sgpl1		54.769	+	1.22779	0.0367516	-2.29633
A2A7S7;Q91WQ3;F6VXZ2	Tyrosine--tRNA ligase;Tyrosine--tRNA ligase, cytoplasmic;Tyrosine--tRNA ligase, cytoplasmic, N-terminally processed	Yars		63.001	+	1.59224	0.0337882	0.735912
F8VPM0;E9Q374;A0A1W2P6X9;Q91YE5;A0A1W2P6L0	Bromodomain adjacent to zinc finger domain protein 2A	Baz2a		209.4	+	1.29308	0.0335812	1.64949
P11031	Activated RNA polymerase II transcriptional coactivator p15	Sub1		14.427	+	1.19486	0.032466	-4.13721
D3YUP1;Q9WVG6;D6RFA7	Histone-arginine methyltransferase CARM1	Carm1		70.322	+	1.78597	0.0323613	-0.599967
Q8BPK2		Zcchc3		43.77	+	1.28327	0.0323459	1.81708
F8VQ93;Q8VDD9;A0A087WR26;A2AHJ4;A0A087WP89	PH-interacting protein	Phip		206.72	+	1.19598	0.0322572	3.99866
Q8VEM8;G5E902	Phosphate carrier protein, mitochondrial	Slc25a3		39.632	+	1.65284	0.0322445	-0.691013
Q9CR62;Q5SX46;Q5SX48	Mitochondrial 2-oxoglutarate/malate carrier protein	Slc25a11		34.155	+	1.22289	0.0321538	-2.93348
Q9CX34	Suppressor of G2 allele of SKP1 homolog	Sugt1		38.158	+	1.56079	0.0321203	0.805069
Q61171;D3Z4A4	Peroxiredoxin-2	Prdx2		21.778	+	1.36285	0.0320511	-1.3248
P58252	Elongation factor 2	Eef2	+	95.313	+	1.49347	0.0320189	-0.916269
P27661	Histone H2AX	H2afx	+	15.142	+	1.2018	0.031949	3.67014
P68369;P05214;Q3UX10	Tubulin alpha-1A chain;Tubulin alpha-3 chain	Tuba1a;Tuba3a	+	50.135	+	1.20884	0.0319088	-3.80067
Q8VDW0;D6RHT5	ATP-dependent RNA helicase DDX39A	Ddx39a		49.067	+	1.72261	0.0318476	0.640482
P14869;S4R1N1;D3YVM5	60S acidic ribosomal protein P0	Rplp0	+	34.216	+	1.62359	0.0318052	-0.743081
G3UZA0;Q8BGA5	KRR1 small subunit processome component homolog	Krr1		36.66	+	1.72717	0.0301462	-0.677521
Q62101	Serine/threonine-protein kinase D1	Prkd1		102.04	+	1.25097	0.0300464	-2.90365
A2AWT5;P25976;A2AWT6;A2AWT7;G3UZW9;E9Q4A8	Nucleolar transcription factor 1	Ubtf		89.478	+	1.47292	0.0299472	1.04459
Q6GT24;O08709;D3Z0Y2;Q8BG37;A0A0A6YXQ7	Peroxiredoxin-6	Prdx6		24.826	+	1.30089	0.0298487	-1.97465
O70503	Very-long-chain 3-oxoacyl-CoA reductase	Hsd17b12		34.741	+	1.57759	0.0297933	-0.849736
Q8CG76	Aflatoxin B1 aldehyde reductase member 2	Akr7a2		40.612	+	1.45319	0.0297508	-1.08213
O70201	Baculoviral IAP repeat-containing protein 5	Birc5		16.297	+	1.22516	0.0296536	3.47858
P61327;A0A023T778;Q9CQL1;G3UZW7	Protein mago nashi homolog;Protein mago nashi homolog 2	Magoh;Magohb		17.163	+	1.26761	0.0291639	2.62068
A0A0J9YUZ4;P63158;A0A0J9YUD8;D3YZ18;D3YVC6	High mobility group protein B1	Hmgb1		24.233	+	1.34067	0.028963	-1.71945
Q9ERU9	E3 SUMO-protein ligase RanBP2	Ranbp2		341.12	+	1.3833	0.0288658	-1.43288
Q921K2;P11103;A0A0A6YX03;A0A0A6YY63;A0A0A6YVX0	Poly [ADP-ribose] polymerase 1	Parp1		112.72	+	1.27918	0.0288	2.65192
P05202	Aspartate aminotransferase, mitochondrial	Got2		47.411	+	1.68602	0.0287959	-0.731789
Q9DAE2		Rbmxl2		41.912	+	1.26766	0.028701	2.90558
Q62426	Cystatin-B	Cstb		11.045	+	1.53562	0.0286983	-0.943881
Q9D7S7	60S ribosomal protein L22-like 1	Rpl22l1		14.467	+	1.65526	0.0286027	-0.77307
P43277;I7HFT9;Q07133	Histone H1.3	Hist1h1d	+	22.099	+	1.62146	0.0286014	0.804873
Q8BG81;Q3UDD3;F6VR84	Polymerase delta-interacting protein 3	Poldip3		46.132	+	1.49336	0.0285051	1.05505
Q08288;D3Z7N3;D3Z345;D3Z5X8;D3YU83;D6RDT2;D3Z009	Cell growth-regulating nucleolar protein	Lyar		43.735	+	1.96454	0.0283833	0.55441
Q9WVM1;E9Q851;F6WD40;E9Q9N9	Rac GTPase-activating protein 1	Racgap1		70.158	+	1.42751	0.0282847	-1.29145
A0A0A0MQA5;P68368;A0A087WQS4;A0A087WRB4;A0A087WSB0;A0A087WSL5	Tubulin alpha-4A chain	Tuba4a	+	52.793	+	1.56012	0.0281869	0.921876
Q8BP47	Asparagine--tRNA ligase, cytoplasmic	Nars		64.279	+	2.05692	0.0278944	0.522736
A2APB8	Targeting protein for Xklp2	Tpx2		85.893	+	1.30282	0.0277965	2.42887
P38647	Stress-70 protein, mitochondrial	Hspa9	+	73.46	+	1.72486	0.0277376	0.728298
Q8BTI8;A0A087WRX8;A0A087WPS9	Serine/arginine repetitive matrix protein 2	Srrm2		294.84	+	1.35424	0.0276993	1.76748
Q5F2E7	Nuclear fragile X mental retardation-interacting protein 2	Nufip2		75.656	+	1.40754	0.0276396	1.45357
Q9JIX8;F6RJ39;B8JJ91;B8JJ90	Apoptotic chromatin condensation inducer in the nucleus	Acin1		150.72	+	1.28211	0.0274306	3.06183
Q5SSZ5;Q9DBT6;A0A087WRU0;A0A087WQ94;A0A087WQM0;A0A087WQS0;A0A1D5RM59;E9Q0S6;Q8CGB6	Tensin-3	Tns3		155.59	+	1.45493	0.0256143	1.30914
P52927	High mobility group protein HMGI-C	Hmga2		11.819	+	1.30326	0.0253094	-2.79591
O70126	Aurora kinase B	Aurkb		39.384	+	1.31189	0.0252186	2.60656
Q9JHS9;A0A1L1SVD8	Spliceosome-associated protein CWC15 homolog	Cwc15		26.624	+	1.33466	0.02387	2.3125
Q6P5F9;F6YA11;A2AKT6	Exportin-1	Xpo1		123.09	+	1.57996	0.0233164	-0.989594
Q1PSW8	E3 ubiquitin-protein ligase TRIM71	Trim71		92.053	+	1.4182	0.0232319	1.54882
E9Q317;O55128;D3Z2N9;D3YY73;D3YY55	Histone deacetylase complex subunit SAP18	Gm10094;Sap18		19.586	+	1.32354	0.0229051	2.83048
F6YAM1;A0A1D5RM15		Zfp930		50.926	+	1.49159	0.0228125	1.45977
P23116	Eukaryotic translation initiation factor 3 subunit A	Eif3a		161.93	+	2.05789	0.0227237	0.587622
P08113;F7C312	Endoplasmin	Hsp90b1		92.475	+	1.74791	0.0226357	-0.819645
Q3TE40;Q62193;F6V8R7	Replication protein A 32 kDa subunit	Rpa2		29.44	+	1.36233	0.0225483	2.70493
P62259;D6REF3;F6WA09	14-3-3 protein epsilon	Ywhae		29.174	+	1.39599	0.0224615	-2.16701
Q6NSQ7	Protein LTV1 homolog	Ltv1		54.022	+	1.36715	0.0223755	2.58475
D3Z2H9;D3Z6I8;E9Q7Q3;E9Q5J9;A0A0R4J1P2;P21107;S4R2U0;CON__Q3SX28;A2AIM4;P58774;A2AIM5	Tropomyosin alpha-3 chain	Tpm3-rs7;Tpm3		28.991	+	1.68918	0.0222925	-0.945982
A0A0U1RNL1;F8VPK3;A0A0U1RNL9;P56671;A0A0U1RPH5	Myc-associated zinc finger protein	Maz		46.498	+	1.68531	0.0222901	0.901666
Q922Q4;Q922W5;A2ABZ2;A2ABZ3;A2ABZ0	Pyrroline-5-carboxylate reductase 2	Pycr2		33.659	+	1.53439	0.0222059	-1.17115
Q8BHX3;E9Q2C7	Borealin	Cdca8		32.214	+	1.35799	0.0222053	2.74686
P14873	Microtubule-associated protein 1B;MAP1B heavy chain;MAP1 light chain LC1	Map1b		270.25	+	1.37117	0.0222047	-2.949
P56480	ATP synthase subunit beta, mitochondrial	Atp5b		56.3	+	1.65713	0.0221245	-0.892461
Q91Z31;A0A0G2JGW0;Q3V328;A0A0G2JFV8	Polypyrimidine tract-binding protein 2	Ptbp2		57.488	+	1.93565	0.0221212	-0.648453
Q9DBZ5;A0A140LJ59;Q3TY56	Eukaryotic translation initiation factor 3 subunit K	Eif3k		25.086	+	1.40032	0.0221176	2.19439
P40142;E0CY51	Transketolase	Tkt		67.63	+	1.60385	0.0220377	-1.04938
Q64737;D6RCG1	Trifunctional purine biosynthetic protein adenosine-3;Phosphoribosylamine--glycine ligase;Phosphoribosylformylglycinamidine cyclo-ligase;Phosphoribosylglycinamide formyltransferase	Gart		107.5	+	1.70753	0.0220159	0.949242
Q99KP6	Pre-mRNA-processing factor 19	Prpf19		55.238	+	1.60448	0.0219549	1.03974
P02802;A0A1D5RLN7	Metallothionein-1	Mt1		6.0181	+	1.48881	0.0219286	1.61747
L7N1Z0;L7N248		Gm6871		51.081	+	1.37149	0.0218727	2.36686
Q3TUQ5;O35691;A0A1W2P6S1	Pinin	Pnn		82.504	+	1.35973	0.021791	2.51099
Q02257	Junction plakoglobin	Jup		81.8	+	1.6329	0.02171	-0.963951
S4R1W1;S4R1N5;V9GX06;S4R1W8;A0A0R4J0X7;S4R2G5;Q64467;V9GXK0	Glyceraldehyde-3-phosphate dehydrogenase	Gm3839		35.812	+	1.37076	0.0216296	2.31112
P61982	14-3-3 protein gamma;14-3-3 protein gamma, N-terminally processed	Ywhag		28.302	+	1.45059	0.0215498	-1.54403
B7ZNH7;K3W4R4;Q80X19	Collagen alpha-1(XIV) chain	Col14a1		192.75	+	1.42943	0.02016	-2.34273
Q99L45;E0CXJ3	Eukaryotic translation initiation factor 2 subunit 2	Eif2s2		38.092	+	2.21016	0.0193253	0.559955
P63260;B1ATY1;G3UYG0	Actin, cytoplasmic 2;Actin, cytoplasmic 2, N-terminally processed	Actg1	+	41.792	+	2.10004	0.018958	-0.639547
Q5SF07;A6X8Z3	Insulin-like growth factor 2 mRNA-binding protein 2	Igf2bp2		65.583	+	1.75603	0.0189016	-0.950567
Q9DB96	Neuroguidin	Ngdn		35.658	+	1.81628	0.0188787	0.874463
Q8VE73;F6Q1R4;E9Q6H4;E9QP09;S4R1Y1;Q80TT8	Cullin-7	Cul7		192.29	+	1.87658	0.0188245	-0.790006
A0A0U1RQA1;D3Z3V3;P42209;A0A0U1RPA8;D3YVG1	Septin-1	2018-09-01		37.372	+	1.40132	0.0188	3.60155
E9PWQ3;J3QQ16;A0A087WS16;D3YWD1		Col6a3		353.93	+	1.51338	0.018748	-1.738
Q91YQ5;A0A0N4SUJ8	Dolichyl-diphosphooligosaccharide--protein glycosyltransferase subunit 1	Rpn1		68.527	+	1.803	0.018722	-0.890535
Q91VC3;A0A0N4SVP8;E9PV04;A2AFK7;A0A0N4SVM5;D6RJ60;D6RJ11	Eukaryotic initiation factor 4A-III;Eukaryotic initiation factor 4A-III, N-terminally processed	Eif4a3;Gm8994		46.839	+	1.4697	0.0186721	2.07684
P16460;J3QNG0	Argininosuccinate synthase	Ass1;Gm5424		46.584	+	1.77576	0.0186446	0.927841
Q3US17	Zinc finger protein 48	Znf48		64.599	+	1.56902	0.0185968	1.37229
B1AYU7;Q8C5N3;A2AK44;A2AK42;B1AYU4;J3QNR0;J3QM48	Pre-mRNA-splicing factor CWC22 homolog	Cwc22;Gm13695;Gm13697		104.33	+	1.44334	0.0185679	2.57426
E9PZ88;F8WIE1;Q91W89;E9PYM7;F6TFL1;E0CYW2	Alpha-mannosidase;Alpha-mannosidase 2C1	Man2c1		104.68	+	1.82037	0.0184641	-0.879598
Q8VI84	Nucleolar complex protein 3 homolog	Noc3l		93.21	+	1.88399	0.018431	0.849543
P63154	Crooked neck-like protein 1	Crnkl1		83.415	+	1.48118	0.0183519	2.4526
Q6P5E3;Q9ER74;Q62255;B2RTN3;G5E8L5;B9EKF4;O70230;Q9QX96	Sal-like protein 1	Sall1		140.24	+	1.42007	0.0182735	3.85697
Q8R149;F6ZBW5;A0A1L1SSX5	BUD13 homolog	Bud13		72.138	+	1.5136	0.0181957	2.0097
P17751;H7BXC3	Triosephosphate isomerase	Tpi1		32.191	+	2.17587	0.0181186	-0.618216
Q8BMK4	Cytoskeleton-associated protein 4	Ckap4		63.691	+	1.72348	0.0179221	-1.12953
P61965;F6Q3W0	WD repeat-containing protein 5	Wdr5		36.588	+	1.69527	0.0174087	1.22398
Q0VBL3		Rbm15		105.72	+	1.75834	0.0171228	1.08633
D3YUQ9;E9QN08;Q80T06;P57776;D3Z7N2;D3YZT9;A0A0R4J1L2;Q91VK2;A0A0R4J1E2;F6ZFU0;D3YY68	Elongation factor 1-delta	Eef1d	+	21.478	+	1.63635	0.017048	-1.43698
Q9CZ13;A0A0A6YWX6;A0A0A6YW82	Cytochrome b-c1 complex subunit 1, mitochondrial	Uqcrc1		52.851	+	2.09508	0.0163894	0.698759
Q8C2Q3;E9QL13;J3QN51;J3QPT3;B0LM42;F7BGR7	RNA-binding protein 14	Rbm14		69.448	+	2.61387	0.0163172	0.499185
E9QNP0;P62984;A0A0A6YW67;E9Q9J0;E9Q4P0;E9Q5F6;Q5SX22;P0CG49;P0CG50;D3YYZ2	Ubiquitin-60S ribosomal protein L40;Ubiquitin;60S ribosomal protein L40;Polyubiquitin-B;Ubiquitin;Polyubiquitin-C;Ubiquitin;Ubiquitin-related 1;Ubiquitin-related 2	Kxd1;Uba52;Gm8797;Ubc;Ubb		26.856	+	1.62361	0.0153214	1.70045
Q6PGG6;S4R2Q1	Guanine nucleotide-binding protein-like 3-like protein	Gnl3l		65.194	+	1.76734	0.0152533	1.10689
P27773;F6Q404	Protein disulfide-isomerase A3	Pdia3		56.678	+	1.61208	0.0150769	-1.84691
Q01853	Transitional endoplasmic reticulum ATPase	Vcp		89.321	+	1.75494	0.015009	-1.21044
Q6ZWV7;G3UWD7;F6XS56;F6YXU0;Q3U1U4	60S ribosomal protein L35	Rpl35;Gm10269	+	14.552	+	1.76439	0.0149417	1.1828
Q6NVD0	FRAS1-related extracellular matrix protein 2	Frem2		350.64	+	1.72072	0.0149016	-2.02718
Q9DBE9	pre-rRNA processing protein FTSJ3	Ftsj3		95.531	+	2.06644	0.0148247	0.954294
O55143;Q8R429;B1ATS4;B1ATS5;E9Q559;Q64518	Sarcoplasmic/endoplasmic reticulum calcium ATPase 2	Atp2a2		114.86	+	1.94062	0.0147487	-1.15181
Q9EP97;F6Z9L5	Sentrin-specific protease 3	Senp3		64.402	+	1.9219	0.0147431	0.93194
Q62318	Transcription intermediary factor 1-beta	Trim28		88.846	+	1.97915	0.0146758	0.862247
Q91V89;Q60996;Q3UZJ4;Q6PD28;Q61151	Serine/threonine-protein phosphatase 2A 56 kDa regulatory subunit gamma isoform	Ppp2r5d;Ppp2r5c		68.994	+	2.2394	0.0146735	-0.781791
P09242;E9Q7P8;B1AXF5;B1AXF6	Alkaline phosphatase, tissue-nonspecific isozyme;Alkaline phosphatase	Alpl		57.514	+	1.52656	0.0146091	-2.87795
G3UXL2;Q9D7G0	Ribose-phosphate pyrophosphokinase 1	Prps1l3;Prps1		34.824	+	1.91165	0.014599	1.19661
Q5SXC3;Q5SXC4		Vezf1		36.947	+	2.20671	0.014534	-0.767413
Q8R3N1	Nucleolar protein 14	Nop14		98.768	+	1.93858	0.0145253	1.13192
P52480;A0A1L1SU37;A0A1L1SQV8;A0A1L1SSN6;A0A1L1STV8;A0A1L1SUV0;A0A1L1ST52;A0A1L1SVH2;E9Q509;G3X925;P53657	Pyruvate kinase PKM	Pkm		57.844	+	2.1207	0.0144734	1.08102
A2AF47;A2AF67;A2AF65;A0A1D5RM88;A0A1D5RLE0;E9QMR2;A0A1D5RMM1;F8VPN7;Q8BIK4	Dedicator of cytokinesis protein 11	Dock11		237.77	+	1.77498	0.0144638	-1.47086
Q99PV0;B7ZC27	Pre-mRNA-processing-splicing factor 8	Prpf8		273.61	+	1.79074	0.0144558	1.20678
Q8BKC5;Q8BIV3	Importin-5	Ipo5		123.59	+	1.84914	0.0144523	-1.33935
Q8BGS0	Protein MAK16 homolog	Mak16		35.185	+	1.74295	0.0144271	-1.93665
G5E870;A0A087WNZ7;A0A0B4J1N9;A0A087WRV6;A0A087WQ02;A0A087WP92;Q3TP48;A0A087WSG4;A0A087WS65;A0A087WS33	E3 ubiquitin-protein ligase TRIP12	Trip12		224.13	+	2.00302	0.0143942	0.949924
L7N208;F7AIG4;L7N212;Q8BZW4		Gm10324		70.027	+	1.64949	0.0143889	1.71814
E9QNH6;E9Q580;Q7TQD7;P46735;D3YV80;O88329	Unconventional myosin-Ib	Myo1b		125.03	+	2.09762	0.0143882	-1.11554
S4R1G9;P10755;Q6P9Y7	Zinc finger protein 14;Zinc finger protein 82	Zfp82;Zfp14		58.7	+	1.65826	0.01438	2.45191
A6H6E2	Multimerin-2	Mmrn2		105.21	+	1.71749	0.0143254	-1.70135
A0A0N5E9G7;G3X8Z6;Q5U4B1;G3UWX1;P35601;A0A0N4SVN6	Replication factor C subunit 1	Rfc1		125.86	+	2.09053	0.0143226	0.768492
Q8VHZ7;F6VY64	U3 small nucleolar ribonucleoprotein protein IMP4	Imp4		33.656	+	1.908	0.0143085	1.1706
Q9Z2Z9	Glutamine--fructose-6-phosphate aminotransferase [isomerizing] 2	Gfpt2		77.008	+	1.9768	0.0143041	1.36933
Q99MR6;A0A0G2JDF8;A0A0G2JG65;A0A0G2JDF1;A0A0G2JDN3	Serrate RNA effector molecule homolog	Srrt		100.45	+	1.77649	0.0142571	1.40746
Q9Z1Q5	Chloride intracellular channel protein 1	Clic1		27.013	+	1.70992	0.0142376	-1.93415
Q6KCD5	Nipped-B-like protein	Nipbl		315.45	+	1.9476	0.0142209	1.45281
Q8BWT1	3-ketoacyl-CoA thiolase, mitochondrial	Acaa2		41.829	+	1.71838	0.0141896	-1.61857
Q6A068;A0A1W2P7S8;A0A1W2P7Z8;A0A1W2P7H4;A0A1W2P855;A0A1W2P6Q8	Cell division cycle 5-like protein	Cdc5l		92.188	+	1.87285	0.0141675	1.23516
F8WI31;D3Z4V1;Q922V4	Pleiotropic regulator 1	Plrg1		42.438	+	1.92893	0.0141387	1.51474
Q9D287;D6RGA5;D6RHR7	Pre-mRNA-splicing factor SPF27	Bcas2		26.131	+	1.73322	0.0141226	1.52242
Q8K301	Probable ATP-dependent RNA helicase DDX52	Ddx52		67.473	+	2.04703	0.014098	0.919703
E9Q5G3;A0A1L1SRP4	Kinesin-like protein KIF23	Kif23		108.77	+	2.16757	0.0140575	-1.00077
Q61625	Glutamate receptor ionotropic, delta-2	Grid2		113.08	+	1.62428	0.0140563	-2.22684
Q60520;E9PXF9	Paired amphipathic helix protein Sin3a	Sin3a		145.09	+	1.86333	0.0140293	1.22686
A2A8U2	Transmembrane protein 201	Tmem201		72.499	+	1.85521	0.0140211	-1.48776
Q9CZU3	Superkiller viralicidic activity 2-like 2	Skiv2l2		117.64	+	2.21067	0.0139907	0.724708
A2ALW2		Zkscan16		83.826	+	1.72106	0.0139771	3.03489
Q61686;D3Z0U2	Chromobox protein homolog 5	Cbx5		22.186	+	1.61543	0.0139476	4.24546
Q9WU62	Inner centromere protein	Incenp		101.21	+	1.73543	0.0138977	2.74186
Q9R1X4;H7BX89	Protein timeless homolog	Timeless		137.5	+	1.99489	0.0138323	1.35663
O70475;D3YXP9	UDP-glucose 6-dehydrogenase	Ugdh		54.831	+	1.78162	0.0138192	2.21954
P48962;Q3V132	ADP/ATP translocase 1	Slc25a4		32.904	+	1.99561	0.01375	-1.34054
Q3T9X3;Q3TCR7;G3X9G4;F8WIV5;P39054;G3UZZ3;E9QLL2;Q8BZ98;A0A0J9YUE9;A0A0J9YUN4;P39053;D6RH60;G3UY64;G3UXX2	Dynamin-2;Dynamin-3	Dnm2;Dnm3		97.194	+	1.81935	0.0137416	-1.91483
Q9QYI3;A2A5E1;F7BTP8	DnaJ homolog subfamily C member 7	Dnajc7		56.475	+	2.00873	0.0136882	1.13423
P43275	Histone H1.1	Hist1h1a		21.785	+	1.89065	0.0136648	1.55977
A6PWY4;Z4YK23	WD repeat-containing protein 76	Wdr76		69.007	+	2.84954	0.0136615	2.52601
E9Q718;Q9R0B9	Procollagen-lysine,2-oxoglutarate 5-dioxygenase 2	Plod2		86.9	+	1.78945	0.013615	-1.83607
Q8VCG3;A0A1B0GS18;Q3UL50	WD repeat-containing protein 74	Wdr74		42.636	+	1.87917	0.0135889	-1.58464
O08528;E9Q5B5;E9Q9M6;G3UVV4;P17710;Q91W97;D3YYR4;D3Z365	Hexokinase-2;Hexokinase	Hk2		102.53	+	1.99259	0.0135426	1.15342
Q3TVK3;Q9Z2W0;Q8BPW9;A0A087WS31;A0A087WSE6;A0A087WRC1;A0A087WSU0;A0A087WNX3;A0A087WSD3	Aspartyl aminopeptidase	Dnpep		52.466	+	3.02638	0.0135405	-1.45378
Q01149;E0CXI2	Collagen alpha-2(I) chain	Col1a2		129.56	+	1.72385	0.0135195	-4.56766
P97807	Fumarate hydratase, mitochondrial	Fh		54.356	+	2.55875	0.0135138	-0.677987
P97314;A0A1W2P845;A0A1W2P758;A0A1W2P6I3;A0A1W2P7N8;A0A1W2P780	Cysteine and glycine-rich protein 2	Csrp2		20.926	+	1.906	0.0134709	1.35409
Q3V300	Kinesin-like protein KIF22	Kif22		73.189	+	3.02118	0.0134545	1.89121
Q03147;Q8BWQ5	Cyclin-dependent kinase 7	Cdk7		38.968	+	1.72614	0.0134396	2.62789
Q5RJG1	Nucleolar protein 10	Nol10		80.076	+	2.14552	0.0134323	1.15267
A3KGC3;A3KGC4;A3KGC5;Q8CIN4;Q61036;A0A0U1RQ87;S4R2K7;G5E884;O88643	Serine/threonine-protein kinase PAK 2;PAK-2p27;PAK-2p34;Serine/threonine-protein kinase PAK 3;Non-specific serine/threonine protein kinase;Serine/threonine-protein kinase PAK 1	Pak3;Pak2;Pak1		17.379	+	1.85706	0.0133661	1.63742
Q61330;A0A087WQQ9	Contactin-2	Cntn2		113.22	+	2.63288	0.01336	-2.60629
L7N452;L7N2C1;L7N1Y9		Zfp640		31.484	+	1.91185	0.0133462	1.85069
P21619	Lamin-B2	Lmnb2		67.317	+	1.94553	0.0133091	-1.51979
Q4VBE8	WD repeat-containing protein 18	Wdr18		47.211	+	1.67406	0.0132935	3.44627
Q8BFZ9;A0A1B0GT70;A0A1B0GSD8	Erlin-2	Erlin2		37.872	+	2.0581	0.0132611	-1.31784
E9QKA2;G5E8P8;Q61539;D3YW03	Steroid hormone receptor ERR2	Esrrb		48.955	+	2.70407	0.0132537	3.40407
H3BJQ3;H3BKE5;E9QMH1;H3BJ44;H3BJL0;Q99J72;Q3TI69;H3BKS1;H3BJJ6;H3BJD1;H3BL97	DNA dC->dU-editing enzyme APOBEC-3	Apobec3		46.97	+	2.19422	0.0132289	1.00032
Q61024;D3Z0C2;D3YYR0;D3Z028	Asparagine synthetase [glutamine-hydrolyzing]	Asns		64.282	+	2.05028	0.0132216	1.1034
F6QKD2;Q9CWX9;A0A0N4SVT1;A0A0N4SWC5;A0A0N4SVK2;D3YWF9	Probable ATP-dependent RNA helicase DDX47	Ddx47		39.913	+	2.4825	0.0131842	3.36054
H3BJU7;H3BJX8;H3BJ45;H3BJ40;H3BKH9;Q60875;H3BL15;H3BLF9;H3BJ59;H3BLJ1;H3BIX8;H3BJM4;H3BJ48	Rho guanine nucleotide exchange factor 2	Arhgef2		108.59	+	2.05205	0.0131772	-1.32878
E9QAT0;Q6AXB7;P35922;D3Z6U8;E9QNF5;E9QAS8;E9QAS9	Fragile X mental retardation protein 1 homolog	Fmr1		66.169	+	2.11396	0.0131608	-1.4346
Q640M1;Q6EJB6;E9Q9S3	U3 small nucleolar RNA-associated protein 14 homolog A	Utp14a		87.264	+	2.19493	0.0130943	1.04604
Q91ZW3;Q6PGB8;F6Z6F4;Q8BS67	SWI/SNF-related matrix-associated actin-dependent regulator of chromatin subfamily A member 5	Smarca5		121.63	+	2.30836	0.0130694	1.05869
P20029	78 kDa glucose-regulated protein	Hspa5	+	72.421	+	3.60486	0.0130588	-1.09436
P02463;A0A1B0GSI7;A0A1B0GRC0;F7CK55;Q63ZW6	Collagen alpha-1(IV) chain;Arresten	Col4a1		160.68	+	2.4767	0.013013	-3.26323
F7AA45;E9Q8F0;Q8VH51;B7ZD61;B7ZD63	RNA-binding protein 39	Rbm39		33.828	+	1.92837	0.0130125	-1.65975
Q6PR54	Telomere-associated protein RIF1	Rif1		266.23	+	2.15719	0.0129793	1.25568
A0A0N4SVT3;A0A0N4SW28;Q9DAS9	Guanine nucleotide-binding protein G(I)/G(S)/G(O) subunit gamma-12	Gng12		7.1971	+	1.85654	0.0129317	-1.98559
P14733	Lamin-B1	Lmnb1		66.785	+	1.99359	0.0128904	-1.73643
E9Q7W0;A0A0J9YTV5;P31266;Q3U6F1;A0A0J9YVE0	Recombining binding protein suppressor of hairless	Rbpj		54.325	+	2.63714	0.0128696	3.52683
Q9JJF3	Bifunctional lysine-specific demethylase and histidyl-hydroxylase NO66	No66		67.556	+	2.54317	0.0128519	-0.731282
Q8K297	Procollagen galactosyltransferase 1	Colgalt1		71.06	+	2.35651	0.0128462	-5.23168
Q9D3B1	Very-long-chain (3R)-3-hydroxyacyl-CoA dehydratase 2	Hacd2		28.402	+	2.01552	0.0128027	1.61905
A0A0U1RPD8;Q8K284;A0A0U1RP70;A0A0U1RNK8	General transcription factor 3C polypeptide 1	Gtf3c1		226.76	+	2.74441	0.012773	-0.646631
Q99M28	RNA-binding protein with serine-rich domain 1	Rnps1		34.208	+	1.78406	0.0127162	3.72072
O55029	Coatomer subunit beta	Copb2		102.45	+	2.10986	0.0126951	-1.12772
E9QPX1;P39061;A0A1W2P6N8	Collagen alpha-1(XVIII) chain;Endostatin	Col18a1		182.29	+	2.93818	0.0126857	-1.86365
Q8BX22;A2AUZ7;A2AUZ6	Sal-like protein 4	Sall4		113.11	+	2.48386	0.0126835	2.99235
Q8C9H6;E9QN41;Q8C079	Striatin-interacting proteins 2	Strip2		96.293	+	1.75837	0.0126309	4.35139
Q9D0T1;E9PZS4	NHP2-like protein 1;NHP2-like protein 1, N-terminally processed	Nhp2l1		14.173	+	2.67271	0.0125843	-1.58472
Q91VB8;P01942	Hemoglobin subunit alpha	haemaglobin alpha 2;Hba		15.112	+	1.98567	0.0125467	-1.6697
Q922U1;E0CYD0;F6T4V0	U4/U6 small nuclear ribonucleoprotein Prp3	Prpf3		77.454	+	3.01572	0.012525	1.28809
P52624;E9Q391;Q5SUC6;F6YBT6;E9Q5K7;Q8R093;Q8CGR7	Uridine phosphorylase 1	Upp1		34.086	+	3.50377	0.012507	1.10643
P53996;A0A0N4SVS6;Q9D548	Cellular nucleic acid-binding protein	Cnbp		19.592	+	2.36785	0.0124681	1.02013
Q922R8;Q3TML0	Protein disulfide-isomerase A6	Pdia6		48.1	+	2.34726	0.0124636	-0.938072
P21981;G3UXE8	Protein-glutamine gamma-glutamyltransferase 2	Tgm2		77.06	+	2.17924	0.0124444	-8.26122
V9GXQ9;Q91UZ1;A2AT91	Phosphoinositide phospholipase C	Plcb4		116.06	+	1.82449	0.0123816	2.59211
Q60932;F2Z471	Voltage-dependent anion-selective channel protein 1	Vdac1		32.351	+	2.11987	0.0123803	-1.43767
D3Z396;Q8BG33;Q99PJ0;Q6DFY2;G5E8G3;F6Z2M6;F6RQ26	Neurotrimin	Ntm;Opcml		34.954	+	2.43099	0.0123704	-3.52656
P35293	Ras-related protein Rab-18	Rab18		23.035	+	3.0906	0.0123333	-1.43265
P28481	Collagen alpha-1(II) chain;Collagen alpha-1(II) chain;Chondrocalcin	Col2a1		141.97	+	2.28104	0.0123077	-3.89041
A0A0J9YU83;F7BJB9		Morc3		98.509	+	1.84164	0.0123007	2.38807
Q9JIK5	Nucleolar RNA helicase 2	Ddx21		93.55	+	2.68062	0.0122195	-1.86397
Q6P3E7;D3Z7T4	Histone deacetylase 10	Hdac10		72.108	+	3.11088	0.0121887	-2.50717
Q3UL36;A0A140LIS5;Q8CIS0	Arginine and glutamate-rich protein 1	Arglu1		32.887	+	2.37213	0.0121739	-2.71042
Q62009;CON__Q2KJC7;F7C9H0	Periostin	Postn		93.142	+	2.68848	0.0121644	-2.52721
Q921E6;A0A140LIG5;A0A140LIN6	Polycomb protein EED	Eed		50.197	+	2.24815	0.0120882	1.28576
Q64433	10 kDa heat shock protein, mitochondrial	Hspe1		10.963	+	2.43038	0.0120723	-3.32287
Q9CWR8;D3YUQ4	DNA (cytosine-5)-methyltransferase 3-like	Dnmt3l		47.992	+	2.36079	0.012043	2.74486
Q04857	Collagen alpha-1(VI) chain	Col6a1		108.49	+	1.86471	0.012	-3.92868
Q61554	Fibrillin-1	Fbn1		312.3	+	3.00954	0.011963	-2.91135
Q9R0N0	Galactokinase	Galk1		42.295	+	2.5483	0.0119286	2.1431
Q78JE5;Q3V492;D6REV6;D3Z2G9	F-box only protein 22	Fbxo22		44.202	+	2.60606	0.0119149	1.61773
G3UYN0;Q587J6;E9PZU6;E9PXD6	LINE-1 type transposase domain-containing protein 1	L1td1		95.434	+	2.07018	0.011913	1.76999
Q3UT17;J3QPX0		5730507C01Rik		45.208	+	2.16059	0.0118273	1.45327
Q8BP40	Lysophosphatidic acid phosphatase type 6	Acp6		47.624	+	3.22626	0.0118222	2.66482
Q61263;A0A087WNN8;A0A087WSJ5	Sterol O-acyltransferase 1	Soat1		63.798	+	2.50333	0.0117895	-1.90943
Q7TND5;A0A0G2JEG7;A0A0G2JFR7	Ribosome production factor 1	Rpf1		40.036	+	2.62418	0.0117882	-1.83098
P68033;P62737;P68134;P63268;D3YZY0;D3Z2K3;A0A1D5RM20;A0A0U1RQ96	Actin, alpha cardiac muscle 1;Actin, aortic smooth muscle;Actin, alpha skeletal muscle;Actin, gamma-enteric smooth muscle	Actc1;Acta2;Acta1;Actg2	+	42.019	+	3.06801	0.0117455	-2.35776
A0A140LHA2;Q9WVA3;A0A140LJ21;A0A140LIM5;A0A140LI47	Mitotic checkpoint protein BUB3	Bub3		36.766	+	2.41491	0.0117429	1.01709
Q6J1H4;Q148W8	Undifferentiated embryonic cell transcription factor 1	Utf1		36.407	+	2.36648	0.0117333	1.49171
D3Z383;Q07646;D3YZ83	Mesoderm-specific transcript protein	Mest		39.502	+	2.3068	0.0116667	-3.03338
Q02788;D3Z7D5	Collagen alpha-2(VI) chain	Col6a2		110.33	+	2.31492	0.0116512	-4.24476
Q9Z0R9	Fatty acid desaturase 2	Fads2		52.387	+	2.53233	0.0116364	-1.18981
Q9Z1N2	Origin recognition complex subunit 1	Orc1		95.102	+	2.3582	0.0116	1.23037
Q80ZM5		H1fx		20.151	+	3.4869	0.0115652	-1.90193
P47857	ATP-dependent 6-phosphofructokinase, muscle type	Pfkm		85.268	+	2.50931	0.0115464	-1.8313
E9PUT0;F6UQD0;Q7M6W8;Q7TMC9;A0A087WPV0;B8JJY3;F2Z422;F8VPP0;Q6DFU8;E9PVW1;Q571J5;O88253;E9Q1L8;A0A087WQI7;Q9CZ29;Q6PEP4;Q9Z117;G3UVW7;Q80ZX2;Q3U4L8;B1B1D3;E9Q0Q3;Q07231	Zinc finger protein 354C	3110052M02Rik;Zfp273;Zfp85;Zfp708;Zfp948;Zkscan7;Znf354c		53.739	+	2.23059	0.011541	1.93325
Q99ME9	Nucleolar GTP-binding protein 1	Gtpbp4		74.112	+	3.42771	0.0115357	-1.55678
Q8K3F7;F6X7T7;F7AJL7;F6Y7H0	L-threonine 3-dehydrogenase, mitochondrial	Tdh		41.461	+	2.38289	0.0115172	3.08375
P02798	Metallothionein-2	Mt2		6.1153	+	2.02775	0.0115115	2.31897
O08553	Dihydropyrimidinase-related protein 2	Dpysl2		62.277	+	2.10466	0.0114472	-2.64869
P35979;F8VQK7	60S ribosomal protein L12	Rpl12	+	17.804	+	4.03611	0.0114286	-0.671684
P57784;A0A0U1RNZ6;G5E883	U2 small nuclear ribonucleoprotein A	Snrpa1		28.357	+	2.9875	0.0114242	0.715057
Q8CI11	Guanine nucleotide-binding protein-like 3	Gnl3		60.786	+	3.2201	0.0113864	0.991788
P99027	60S acidic ribosomal protein P2	Rplp2	+	11.651	+	2.75714	0.0113548	-0.925268
Q8VDF2;E9Q5Y5;Q7TMI3	E3 ubiquitin-protein ligase UHRF1	Uhrf1		88.303	+	2.05986	0.0113383	2.05228
A2A9J5		Gm13242		75.497	+	2.87687	0.0113333	3.41902
P54276	DNA mismatch repair protein Msh6	Msh6		151.08	+	3.58043	0.0113191	1.71096
B8JJZ4;K7N6H3;L7N201;D3YUB7;A0A087WPN2;H3BK19;A2AWK6;A0A0R4J1Q9;A0A0R4J0E2;P46684;Q62521;Q3UZD5;Q7TQ40;Q8K083		Zfp808;Zfp934		89.233	+	2.25019	0.0113131	3.54542
E9QP46;Q6ZWQ0;F6W8R9;D3YVK9;Q6ZWN0;D3Z412;D6RH38;F6VTU3;E9QAX1;Q80Y61	Nesprin-2	Syne2		782.13	+	2.19112	0.011264	-1.87357
Q922F4	Tubulin beta-6 chain	Tubb6	+	50.09	+	2.28533	0.0112537	-1.2967
P32037	Solute carrier family 2, facilitated glucose transporter member 3	Slc2a3		53.478	+	2.50141	0.0112	1.71172
P28658	Ataxin-10	Atxn10		53.706	+	2.31236	0.0111746	-1.46856
Q7TSZ8;Q9DCM7	Nucleus accumbens-associated protein 1;Nucleus accumbens-associated protein 2	Nacc1;Nacc2		56.536	+	2.20149	0.0111704	1.44498
Q5SX75;Q60716;B0QZH3;B0QZH1;Q5SX76;B0QZH2;F6ULE1	Prolyl 4-hydroxylase subunit alpha-2	P4ha2		61.014	+	2.80952	0.0111379	-3.83497
Q3UHL6;A0A087WR50;P11276;A0A087WS56;A0A087WS99;Q4KL80;A0A087WQE0;A0A087WQW8	Fibronectin;Anastellin	Fn1		260.13	+	2.137	0.0110891	-5.54888
A2ATQ5;P53995;Q6PG65	Anaphase-promoting complex subunit 1	Anapc1		134.72	+	2.03094	0.0110866	-2.59556
Q6ZQ73	Cullin-associated NEDD8-dissociated protein 2	Cand2		135.63	+	3.64946	0.0110833	-1.60533
Q80X90	Filamin-B	Flnb		277.82	+	2.27091	0.011	-1.42512
O55135;A6PWZ2;D6RG53;D6RJJ3;B1AZQ4	Eukaryotic translation initiation factor 6	Eif6		26.511	+	2.38097	0.0109916	-1.47971
P56183;A0A1W2P7C5	Ribosomal RNA processing protein 1 homolog A	Rrp1		54.776	+	2.67972	0.0109804	-1.3205
D3Z0M9		Ddx23		95.493	+	3.24344	0.0109492	-1.75531
Q8BK35		Gltscr2		55.792	+	2.1297	0.0109147	1.87359
P47941	Crk-like protein	Crkl		33.83	+	2.96584	0.0108738	-1.01407
K7N769;O88245;A0A1W2P7G7		2410141K09Rik		53.746	+	3.34503	0.0108571	2.13509
P83917;Q7TPM0;Q9CYJ8	Chromobox protein homolog 1	Cbx1		21.418	+	2.08237	0.0107965	4.03923
Q5SS83;Q60634	Flotillin-2	Flot2		47.116	+	2.33891	0.0107692	-2.32633
A2BE23;F7CEW8;A2ART4;A2ARW1;A0A1B0GRI9		Gm14305;Gm4631;Gm14434;Gm14410		57.649	+	3.1859	0.0107667	1.8435
Q9CWZ3;A0A0G2JFX7;A0A0N4SUH6;A0A0G2JEA9	RNA-binding protein 8A	Rbm8a		19.889	+	2.05772	0.0107018	4.51874
Q9Z2V5;A0A1B0GX25;B1AUA8;B1AUA9	Histone deacetylase 6	Hdac6		125.79	+	2.50506	0.0106667	-1.63695
P54071;D6RIL6;A0A0U1RP68;A0A0U1RPR1;D3YVY3;A0A087WPT4;A0A087WRS9;O88844	Isocitrate dehydrogenase [NADP], mitochondrial	Idh2		50.906	+	3.47158	0.01064	-1.86238
P61222	ATP-binding cassette sub-family E member 1	Abce1		67.314	+	2.53324	0.0106087	1.29733
A0A0R4J0L6;Q8BJZ4	28S ribosomal protein S35, mitochondrial	Mrps35	+	35.917	+	2.85216	0.0105902	3.1684
P13864;J3QNW0	DNA (cytosine-5)-methyltransferase 1;DNA (cytosine-5)-methyltransferase	Dnmt1		183.19	+	2.20524	0.010566	3.44737
P63101;D3YXN6;D3YXF4;D3YW45	14-3-3 protein zeta/delta	Ywhaz		27.771	+	3.48051	0.0105366	-2.10462
Q80X41	Serine/threonine-protein kinase VRK1	Vrk1		49.74	+	2.78437	0.0105172	0.989922
P12025	Midkine	Mdk		15.434	+	2.31848	0.0104673	-2.34372
Q9ERD7;A0A1D5RM76	Tubulin beta-3 chain	Tubb3	+	50.418	+	3.10431	0.0104314	-2.80163
F6SH61;Z4YMB8;A0A0R4J196;F8WH31;E9PUD1;Q58A65	C-Jun-amino-terminal kinase-interacting protein 4	Spag9		84.935	+	2.29429	0.0104274	-1.79172
Q9CZX8;D3YUT3;D3Z5R8;D3Z722;D3YUG3;S4R223	40S ribosomal protein S19	Rps19	+	16.085	+	3.69087	0.0104194	-1.21955
A0A0R4J1N9;P40630;D3Z0F3	Transcription factor A, mitochondrial	Tfam		23.384	+	2.32638	0.0103704	2.20019
Q60I23;P48432;Q811W0;P53783;S4R1I8;A2AM37;Q04892;P53784;Q62247;P43267	Transcription factor SOX-2	Sox2		34.406	+	2.06	0.010339	3.652
A2AJY2;O35206;A2AJY7;A2AJY5	Collagen alpha-1(XV) chain;Restin	Col15a1		138.29	+	3.51178	0.0102857	-2.00327
P48678;D3YUF7	Prelamin-A/C;Lamin-A/C	Lmna		74.237	+	2.35674	0.0102752	-1.98372
A0A1W2P6F6;A0A1W2P7Q9;Q60605;A0A1W2P6G5;Q8CI43	Myosin light polypeptide 6	Myl6		17.005	+	2.8414	0.010254	-3.00223
Q9CR47	Ribosome biogenesis protein NSA2 homolog	Nsa2		30.036	+	3.3605	0.0102308	1.90906
Q9QZF2	Glypican-1;Secreted glypican-1	Gpc1		61.359	+	2.21611	0.0101818	-2.86904
Q8BJS4;E0CY39	SUN domain-containing protein 2	Sun2		81.604	+	2.85487	0.0100938	-2.86852
Q69Z99;A0A0J9YTU9;A0A0J9YTW0;A0A0J9YV10	Zinc finger protein 512	Znf512		63.908	+	2.54321	0.0100901	-1.39209
Q8K4R9;A0A0R4J0G7;J3QPN1;E9QQ48	Disks large-associated protein 5	Dlgap5		90.195	+	3.45049	0.0100465	2.10643
Q01320	DNA topoisomerase 2-alpha	Top2a		172.79	+	2.36507	0.01	1.81805
E9Q5Q0;Q3TGG2;A0A0U1RPL0;Q7TQH0;J3QP59	Ataxin-2-like protein	Atxn2l		92.071	+	3.48611	0.00981818	1.96407
A2A6Q8;Q9CZ19;P09541	Myosin light chain 4	Myl4		21.045	+	3.17923	0.0088	-4.14793
Q8C605;Q9WUA3;F6YL81;D3YUA3	ATP-dependent 6-phosphofructokinase;ATP-dependent 6-phosphofructokinase, platelet type	Pfkp		85.546	+	3.29068	0.00855556	3.22326
Q62315;G3UZT8;G3UZW3	Protein Jumonji	Jarid2		137.44	+	3.63198	0.00832432	1.97104
Q99K41	EMILIN-1	Emilin1		107.58	+	3.09445	0.00810526	-4.71678
P08122	Collagen alpha-2(IV) chain;Canstatin	Col4a2		167.32	+	3.1192	0.00789744	-4.20456
Q61245;E9PVT8;V9GWX8	Collagen alpha-1(XI) chain	Col11a1		181.03	+	3.15704	0.0077	-3.80107
Q61555	Fibrillin-2	Fbn2		313.82	+	3.36109	0.00612121	-3.55388
Z4YKB8;Q3TEA8;Z4YKA3;A2AM65;A2AM63;A2AM62;A2AM70;A2AM69	Heterochromatin protein 1-binding protein 3	Hp1bp3		60.85	+	3.20349	0.00594118	-4.07801
Q62266	Cornifin-A	Sprr1a		15.765	+	4.28978	0.00517647	-2.69659
Q8VDD5;F2Z494	Myosin-9	Myh9		226.37	+	3.80379	0.00488889	-3.71881
Q3U962	Collagen alpha-2(V) chain	Col5a2		145.02	+	3.55104	0.00463158	-5.81629
Q02566;Q91Z83;G3UW82;A2AQP0;Q1WNP4;B8JJH3	Myosin-6;Myosin-7	Myh6;Myh7		223.56	+	3.53397	0.0044	-5.7975
Q9R0E2;A8Y5E6;F6WNR1	Procollagen-lysine,2-oxoglutarate 5-dioxygenase 1	Plod1		83.594	+	3.63459	0.00419048	-4.48366
Q91WM3	U3 small nucleolar RNA-interacting protein 2	Rrp9		52.106	+	3.76724	0.004	-3.4527
E9PW15;Q80U70	Polycomb protein Suz12	Suz12		80.292	+	4.38214	0.00382609	1.91918
E9PUG8;Q8CCG4	Developmental pluripotency-associated protein 4	Dppa4		26.648	+	3.99218	0.00366667	2.51628
P59999;Q3TX55;E9PWA7	Actin-related protein 2/3 complex subunit 4	Arpc4		19.667	+	3.79248	0.00352	3.08508
P16045	Galectin-1	Lgals1		14.866	+	3.68355	0.00338462	-3.51708
P08752;A0A0A6YWA9;B2RSH2;Q9DC51;A2AE32;P20612;P18872;Q3V3I2;P50149;A2A610;A2AE31;D3Z2M7;F6QPU5;Q66L47;Q8CGK7	Guanine nucleotide-binding protein G(i) subunit alpha-2	Gnai2		40.489	+	3.59375	0.00325926	-3.87989
P11260;E9Q9P2;A2AQ43;A2AQ44;A2AQ42;A2AQ45;A2AQ41;Q80TY0	LINE-1 retrotransposable element ORF1 protein			41.226	+	3.66124	0.00314286	3.30944
Q8CI94;Q9ET01;Q3UEJ6	Glycogen phosphorylase, brain form	Pygb		96.729	+	3.40427	0.00303448	-5.12787
A2A7V0;A2A7U9;A2A799;A2A8V7;A2A7I0;A2A7A0		Zfp600		86.227	+	3.52457	0.00293333	3.82891
E9PZ16;B1B0C7;Q05793	Basement membrane-specific heparan sulfate proteoglycan core protein;Endorepellin;LG3 peptide	Hspg2		469.78	+	3.44284	0.00283871	-4.26739
Q922S8;Q3TTL2;A2AE72	Kinesin-like protein KIF2C;Kinesin-like protein	Kif2c		81.084	+	4.00708	0.00275	1.98367
O88207;A3KGE7;A0A1D5RMJ0;Q9JLI2	Collagen alpha-1(V) chain	Col5a1		183.67	+	5.49471	0	-9.08241
O88322	Nidogen-2	Nid2		153.91	+	4.38892	0	-3.53372
P08121;A0A087WPS3;A0A087WPJ5	Collagen alpha-1(III) chain	Col3a1		138.94	+	5.128	0	-11.1327
P09103;E9Q8G8	Protein disulfide-isomerase	P4hb		57.058	+	3.97394	0	-8.05729
P11087;CON__Q862S4	Collagen alpha-1(I) chain	Col1a1		138.03	+	3.8532	0	-10.6731
P11679	Keratin, type II cytoskeletal 8	Krt8	+	54.565	+	5.06022	0	-5.15232
P19324;A0A140LHR4;A0A140LHK0;A0A140LHD6	Serpin H1	Serpinh1		46.533	+	4.998	0	-5.50637
P20152;A0A0A6YWC8;A2AKJ2;G5E846;G3X981;P15331;D3YZ35;P03995;E9Q1Y9;CON__Q61726;CON__O43790;CON__Q6NT21;CON__P78385;CON__Q14533;CON__P78386;Q6IMF0;Q9Z2T6	Vimentin	Vim		53.687	+	4.35817	0	-4.08277
P21956	Lactadherin	Mfge8		51.24	+	4.33419	0	-6.23097
P46660;A0A0R4J036;P08553;P08551	Alpha-internexin	Ina		55.382	+	4.58994	0	-3.62741
Q3SYK4	Vertnin	Vrtn		83.134	+	4.45384	0	-3.10193
Q3UH59;Q61879;Q5SV64;Q8BXF2;E9Q264	Myosin-10	Myh10		233.45	+	3.93475	0	-5.9377
Q60715	Prolyl 4-hydroxylase subunit alpha-1	P4ha1		60.909	+	3.95581	0	-4.69786
Q8C6P8;G3UYC1;G3UY05;H3BL53;G3UYK1	Zinc finger protein 57	Zfp57		47.958	+	4.25035	0	3.47488
Q9CPN8	Insulin-like growth factor 2 mRNA-binding protein 3	Igf2bp3		63.574	+	5.6598	0	-2.14372
Q9QWT9;E9PUA5;G3UXN2;G3UX22	Kinesin-like protein KIFC1;Kinesin-like protein	Kifc1;Kifc5b		74.152	+	5.37162	0	2.23004

## Sheet: d4
						Strip2 D4 vs WT D0
T: Protein IDs	T: Protein names	T: Gene names	crapome	Mol. weight [kDa]	Strip2_D4_WT_D0	-log10 p-value Strip2_D4_WT_D0	q-value Strip2_D4_WT_D0	Difference Strip2_D4_WT_D0
Q3UHL6;A0A087WR50;P11276;A0A087WS56;A0A087WS99;Q4KL80;A0A087WQE0;A0A087WQW8	Fibronectin;Anastellin	Fn1		260.13	+	2.45317	0.010835	-3.66855
A0A0N4SVC2;E9QP00;Q6PFR5	Transformer-2 protein homolog alpha	Tra2a		32.259	+	2.09981	0.0114497	-2.00644
A0A0N4SVT3;A0A0N4SW28;Q9DAS9	Guanine nucleotide-binding protein G(I)/G(S)/G(O) subunit gamma-12	Gng12		7.1971	+	1.38072	0.0146911	-1.72578
Q6ZWZ4;A0A140T8K6;P47964;D3YX71	60S ribosomal protein L36	Rpl36		12.254	+	3.04024	0.0122063	1.03071
A0A1I7Q4G8;E9QMN5;Q8CHY6	Transcriptional repressor p66 alpha	Gatad2a		65.434	+	1.54483	0.0173596	0.853182
A0A1W2P6F6;A0A1W2P7Q9;Q60605;A0A1W2P6G5;Q8CI43	Myosin light polypeptide 6	Myl6		17.005	+	1.69244	0.012858	-1.26168
A2A547;P84099	Ribosomal protein L19;60S ribosomal protein L19	Rpl19	+	23.247	+	1.37507	0.0433236	0.46868
A2A6Q8;Q9CZ19;P09541	Myosin light chain 4	Myl4		21.045	+	2.98657	0.009	-5.16156
A2A7S7;Q91WQ3;F6VXZ2	Tyrosine--tRNA ligase;Tyrosine--tRNA ligase, cytoplasmic;Tyrosine--tRNA ligase, cytoplasmic, N-terminally processed	Yars		63.001	+	1.94127	0.0127303	-0.673582
A2A7V0;A2A7U9;A2A799;A2A8V7;A2A7I0;A2A7A0		Zfp600		86.227	+	3.42023	0.01	-2.46001
A2A8V8;A2A8V9;E9PUK6;Q52KI8;E9QKA4;F6T4M4;A2A983;F6UK16	Serine/arginine repetitive matrix protein 1	Srrm1		102.66	+	2.2992	0.011971	-2.41147
A2AJY2;O35206;A2AJY7;A2AJY5	Collagen alpha-1(XV) chain;Restin	Col15a1		138.29	+	3.23253	0.00882353	-2.77325
A2AL12;Q8BG05;A2AL13;V9GX38	Heterogeneous nuclear ribonucleoprotein A3	Hnrnpa3		34.476	+	1.9406	0.0117156	-1.92206
A2ALB2;Q6PAQ4;A2ALB1	RNA exonuclease 4	Rexo4		45.465	+	3.60333	0.0118824	1.03134
A2ANY6;J3QMC5		Mdn1		630.33	+	2.34768	0.0114018	0.930728
A2AQA7;Q8CFQ3	Intron-binding protein aquarius	Aqr		161.85	+	2.15225	0.0114925	0.908777
A2AU62;Q64012	RNA-binding protein Raly	Raly		31.69	+	1.24731	0.0314577	-0.716451
A6H6E2	Multimerin-2	Mmrn2		105.21	+	4.76299	0.0236	-2.05793
A6PWY4;Z4YK23	WD repeat-containing protein 76	Wdr76		69.007	+	4.47511	0.0102609	-1.75982
D3YTQ3;F6VQH5;Q9Z130	Heterogeneous nuclear ribonucleoprotein D-like	Hnrnpdl	+	46.27	+	2.27837	0.01172	-2.1213
D3YWT1;D3Z3N4;D3Z6Y3		Hnrnph3	+	35.181	+	1.92562	0.0123158	-3.37064
S4R1M2;D3YXK2;S4R2Q5	Scaffold attachment factor B1	Safb		105.32	+	1.6925	0.0111504	-2.65946
Q9D9P1;D3Z0L4;Q9CRB9;S4R238;F6QFL0	MICOS complex subunit Mic19	Chchd3		20.375	+	1.98889	0.0137527	-0.593993
D3Z383;Q07646;D3YZ83	Mesoderm-specific transcript protein	Mest		39.502	+	1.39963	0.0138398	-2.13223
D3Z396;Q8BG33;Q99PJ0;Q6DFY2;G5E8G3;F6Z2M6;F6RQ26	Neurotrimin	Ntm;Opcml		34.954	+	1.8404	0.0117981	-3.67639
E9PW20;Q9CY57;D3YZA1;D3Z7T7	Chromatin target of PRMT1 protein	Chtop		22.106	+	1.57079	0.0212723	0.592616
E9PWG6		Ncapg		112.87	+	2.13876	0.0114344	1.05532
E9PWQ3;J3QQ16;A0A087WS16;D3YWD1		Col6a3		353.93	+	1.2258	0.0177032	-2.84108
E9PZ16;B1B0C7;Q05793	Basement membrane-specific heparan sulfate proteoglycan core protein;Endorepellin;LG3 peptide	Hspg2		469.78	+	3.06815	0.0102273	-5.35856
E9Q2X6;Q8CG47;A0A0A6YXY3;Q3U763	Structural maintenance of chromosomes protein;Structural maintenance of chromosomes protein 4	Smc4		144.21	+	1.9345	0.0125063	0.841408
E9Q3X0;Q9EQK5;D3Z2N7	Major vault protein	Mvp		96.856	+	1.55002	0.0118788	-2.7345
E9Q5G3;A0A1L1SRP4	Kinesin-like protein KIF23	Kif23		108.77	+	2.97014	0.0116092	-1.64401
E9Q5K9;D6RG95	YTH domain-containing protein 1	Ythdc1		85.648	+	2.08139	0.0117595	-3.53075
F7AA45;E9Q8F0;Q8VH51;B7ZD61;B7ZD63	RNA-binding protein 39	Rbm39		33.828	+	2.22126	0.0109385	-1.81339
E9QK83;Q5XG71;A0A1W2P8D7;A0A1W2P6J9;A0A1W2P7L8	Small subunit processome component 20 homolog	Utp20		317.87	+	1.48107	0.0147385	1.14189
E9QKR0;P62880;D3Z1M1;D3YZX3;D3Z1T4;H3BLF7;E9PWM7;Q61011;P29387	Guanine nucleotide-binding protein G(I)/G(S)/G(T) subunit beta-2	Gnb2		41.408	+	2.29177	0.0112552	-0.927616
E9QP46;Q6ZWQ0;F6W8R9;D3YVK9;Q6ZWN0;D3Z412;D6RH38;F6VTU3;E9QAX1;Q80Y61	Nesprin-2	Syne2		782.13	+	1.92441	0.0109843	-1.42262
E9QPX1;P39061;A0A1W2P6N8	Collagen alpha-1(XVIII) chain;Endostatin	Col18a1		182.29	+	2.52068	0.0112222	-3.98632
F6QKD2;Q9CWX9;A0A0N4SVT1;A0A0N4SWC5;A0A0N4SVK2;D3YWF9	Probable ATP-dependent RNA helicase DDX47	Ddx47		39.913	+	2.84375	0.0105538	3.77807
F8WJA0;Q9ESV0	ATP-dependent RNA helicase DDX24	Ddx24		101.37	+	1.69829	0.0126205	1.06835
F8WJG3;P62996	Transformer-2 protein homolog beta	Tra2b		21.935	+	2.11513	0.0110374	-1.98422
G3UXL2;Q9D7G0	Ribose-phosphate pyrophosphokinase 1	Prps1l3;Prps1		34.824	+	2.16038	0.0119906	1.29251
G3UYN0;Q587J6;E9PZU6;E9PXD6	LINE-1 type transposase domain-containing protein 1	L1td1		95.434	+	3.82752	0.01475	-3.92882
G3X8Y3;Q80UM3;A0A0A6YW80;A0A0A6YX86;A0A0A6YXF4;E9PZ53;Q9DBB4	N-alpha-acetyltransferase 15, NatA auxiliary subunit	Naa15		101.09	+	1.60241	0.0198219	0.636337
G3X956;Q920B9	FACT complex subunit SPT16	Supt16;Supt16h		119.84	+	1.69586	0.0147684	-0.781491
G5E8S0;Q9D4H9;F6TN92;A0A0N4SWI1	PHD finger protein 14	Phf14		99.09	+	2.60028	0.0115404	-1.14518
G5E924;Q8R081;G3UY38;G3UY56;G3UYY3	Heterogeneous nuclear ribonucleoprotein L	Hnrnpl	+	66.821	+	1.73807	0.0120145	-1.82036
H7BX95;Q6PDM2;F7AI47;F6QXN3	Serine/arginine-rich splicing factor 1	Srsf1		28.329	+	2.47925	0.0135094	-2.69475
H9KV04;Q8R3C0	Mini-chromosome maintenance complex-binding protein	Mcmbp		74.575	+	2.11503	0.0112381	0.776617
J3QNY1;B2RXM2		Gm9242;Gm6793		37.14	+	3.64547	0.00983333	-3.76758
O08528;E9Q5B5;E9Q9M6;G3UVV4;P17710;Q91W97;D3YYR4;D3Z365	Hexokinase-2;Hexokinase	Hk2		102.53	+	2.10873	0.0129117	-0.583591
O08553	Dihydropyrimidinase-related protein 2	Dpysl2		62.277	+	1.67433	0.0117993	-1.55437
O08969;A0A140LIM7	Pleckstrin homology-like domain family A member 2	Phlda2		16.727	+	2.76551	0.0124691	2.30023
O09106;D3YYI8;Q3UM33;O88895	Histone deacetylase 1;Histone deacetylase	Hdac1;Gm10093		55.074	+	3.2128	0.0115176	0.726329
O54962	Barrier-to-autointegration factor;Barrier-to-autointegration factor, N-terminally processed	Banf1		10.102	+	1.44344	0.013023	-1.98792
O55135;A6PWZ2;D6RG53;D6RJJ3;B1AZQ4	Eukaryotic translation initiation factor 6	Eif6		26.511	+	2.39271	0.0112381	-1.70826
O55143;Q8R429;B1ATS4;B1ATS5;E9Q559;Q64518	Sarcoplasmic/endoplasmic reticulum calcium ATPase 2	Atp2a2		114.86	+	2.9275	0.0110968	-0.767599
O70475;D3YXP9	UDP-glucose 6-dehydrogenase	Ugdh		54.831	+	2.90376	0.00887097	3.41828
O88207;A3KGE7;A0A1D5RMJ0;Q9JLI2	Collagen alpha-1(V) chain	Col5a1		183.67	+	3.60753	0.0181538	-8.95245
O88322	Nidogen-2	Nid2		153.91	+	3.4052	0.0106061	-3.58688
O88477	Insulin-like growth factor 2 mRNA-binding protein 1	Igf2bp1		63.45	+	2.17959	0.0199442	0.405486
O88569;A0A0N4SUM2	Heterogeneous nuclear ribonucleoproteins A2/B1	Hnrnpa2b1	+	37.402	+	2.48129	0.0132593	-2.57962
P00375	Dihydrofolate reductase	Dhfr		21.606	+	1.39877	0.0194272	-0.985362
P02463;A0A1B0GSI7;A0A1B0GRC0;F7CK55;Q63ZW6	Collagen alpha-1(IV) chain;Arresten	Col4a1		160.68	+	3.44771	0.00813793	-4.52896
P02798	Metallothionein-2	Mt2		6.1153	+	1.41605	0.0145389	-1.44148
P08121;A0A087WPS3;A0A087WPJ5	Collagen alpha-1(III) chain	Col3a1		138.94	+	4.22964	0	-11.8616
P08122	Collagen alpha-2(IV) chain;Canstatin	Col4a2		167.32	+	2.83349	0.00901639	-4.28492
P08752;A0A0A6YWA9;B2RSH2;Q9DC51;A2AE32;P20612;P18872;Q3V3I2;P50149;A2A610;A2AE31;D3Z2M7;F6QPU5;Q66L47;Q8CGK7	Guanine nucleotide-binding protein G(i) subunit alpha-2	Gnai2		40.489	+	3.03717	0.0131169	-1.72573
P09103;E9Q8G8	Protein disulfide-isomerase	P4hb		57.058	+	3.33143	0.00874074	-6.44922
P09242;E9Q7P8;B1AXF5;B1AXF6	Alkaline phosphatase, tissue-nonspecific isozyme;Alkaline phosphatase	Alpl		57.514	+	1.60834	0.011593	-2.92401
P09405;A0A087WRM5	Nucleolin	Ncl		76.722	+	2.79132	0.011971	-0.546663
P11087;CON__Q862S4	Collagen alpha-1(I) chain	Col1a1		138.03	+	5.05244	0	-11.1929
P11260;E9Q9P2;A2AQ43;A2AQ44;A2AQ42;A2AQ45;A2AQ41;Q80TY0	LINE-1 retrotransposable element ORF1 protein			41.226	+	1.58582	0.0115203	-2.3784
P11983;F2Z483	T-complex protein 1 subunit alpha	Tcp1		60.448	+	3.18406	0.0126726	1.0016
P13864;J3QNW0	DNA (cytosine-5)-methyltransferase 1;DNA (cytosine-5)-methyltransferase	Dnmt1		183.19	+	4.00795	0.0131111	2.8214
P14148;F6XI62	60S ribosomal protein L7	Rpl7	+	31.419	+	2.30965	0.0110268	0.803504
P14602;D3YZ06	Heat shock protein beta-1	Hspb1		23.014	+	4.38921	0.0295	-4.6252
P14873	Microtubule-associated protein 1B;MAP1B heavy chain;MAP1 light chain LC1	Map1b		270.25	+	2.65879	0.0140278	-3.99493
P16460;J3QNG0	Argininosuccinate synthase	Ass1;Gm5424		46.584	+	2.87269	0.0133832	-1.39677
P16858;A0A0A0MQF6;A0A1D5RLD8;S4R257;V9GXA7	Glyceraldehyde-3-phosphate dehydrogenase	Gapdh		35.81	+	4.81149	0.00875	1.15228
P17095	High mobility group protein HMG-I/HMG-Y	Hmga1		11.614	+	2.03188	0.0122513	-2.17457
P17918;A0A140T8V5	Proliferating cell nuclear antigen	Pcna		28.785	+	1.80606	0.0199128	0.51401
P19096;A0A0U1RNJ1	Fatty acid synthase;[Acyl-carrier-protein] S-acetyltransferase;[Acyl-carrier-protein] S-malonyltransferase;3-oxoacyl-[acyl-carrier-protein] synthase;3-oxoacyl-[acyl-carrier-protein] reductase;3-hydroxyacyl-[acyl-carrier-protein] dehydratase;Enoyl-[acyl-carrier-protein] reductase;Oleoyl-[acyl-carrier-protein] hydrolase	Fasn		272.43	+	3.37729	0.0118308	0.833442
P19324;A0A140LHR4;A0A140LHK0;A0A140LHD6	Serpin H1	Serpinh1		46.533	+	2.36407	0.0127356	-0.532883
P20029	78 kDa glucose-regulated protein	Hspa5	+	72.421	+	3.21516	0.0122237	-0.777646
P20152;A0A0A6YWC8;A2AKJ2;G5E846;G3X981;P15331;D3YZ35;P03995;E9Q1Y9;CON__Q61726;CON__O43790;CON__Q6NT21;CON__P78385;CON__Q14533;CON__P78386;Q6IMF0;Q9Z2T6	Vimentin	Vim		53.687	+	3.93723	0.00907692	-2.35901
P21619	Lamin-B2	Lmnb2		67.317	+	1.89307	0.0120133	-0.960341
P21956	Lactadherin	Mfge8		51.24	+	3.3025	0.00853659	-3.23133
P21981;G3UXE8	Protein-glutamine gamma-glutamyltransferase 2	Tgm2		77.06	+	3.35118	0.0112381	-12.0654
P25206	DNA replication licensing factor MCM3	Mcm3		91.545	+	2.60117	0.0116338	0.585145
P28481	Collagen alpha-1(II) chain;Collagen alpha-1(II) chain;Chondrocalcin	Col2a1		141.97	+	3.47093	0.00944	-5.29705
P32037	Solute carrier family 2, facilitated glucose transporter member 3	Slc2a3		53.478	+	2.27999	0.0119126	1.14468
P35293	Ras-related protein Rab-18	Rab18		23.035	+	1.70383	0.0139401	-0.847217
P35980;A0A1B0GQU8;A0A1B0GSS8;A0A1B0GSA8;A0A1B0GSF7;A0A1B0GRZ3;A0A1B0GS28	60S ribosomal protein L18	Rpl18	+	21.644	+	2.16968	0.013726	0.532825
P41105;F6Z0X0	60S ribosomal protein L28	Rpl28	+	15.733	+	2.31623	0.0171111	0.42154
P46660;A0A0R4J036;P08553;P08551	Alpha-internexin	Ina		55.382	+	3.06931	0.00849057	-3.46231
P46935;Q3V335;V9GWV8;V9GXK3;V9GXS6;A2A5Z6;Q6I6G8;Q8K4P8	E3 ubiquitin-protein ligase NEDD4	Nedd4		102.71	+	3.17735	0.0112606	0.745174
P47962;D3YYV8	60S ribosomal protein L5	Rpl5	+	34.4	+	1.69145	0.0141755	0.815596
P47963;A0A140T8K8	60S ribosomal protein L13	Rpl13	+	24.305	+	2.39457	0.0117023	0.582575
P48678;D3YUF7	Prelamin-A/C;Lamin-A/C	Lmna		74.237	+	4.22015	0.0262222	-3.12436
P52480;A0A1L1SU37;A0A1L1SQV8;A0A1L1SSN6;A0A1L1STV8;A0A1L1SUV0;A0A1L1ST52;A0A1L1SVH2;E9Q509;G3X925;P53657	Pyruvate kinase PKM	Pkm		57.844	+	3.55934	0.0134912	0.826439
P52624;E9Q391;Q5SUC6;F6YBT6;E9Q5K7;Q8R093;Q8CGR7	Uridine phosphorylase 1	Upp1		34.086	+	2.90842	0.0108177	0.820445
P54071;D6RIL6;A0A0U1RP68;A0A0U1RPR1;D3YVY3;A0A087WPT4;A0A087WRS9;O88844	Isocitrate dehydrogenase [NADP], mitochondrial	Idh2		50.906	+	3.90799	0.0118	-2.98781
P56183;A0A1W2P7C5	Ribosomal RNA processing protein 1 homolog A	Rrp1		54.776	+	1.51995	0.0126586	-1.78288
P56480	ATP synthase subunit beta, mitochondrial	Atp5b		56.3	+	1.8786	0.0259067	-0.390316
Q91YZ2;P56546;E9PWQ9;A0A0J9YUM4;A0A0J9YU62;O88712;E9Q0T4;A0A0J9YU66;A0A0J9YVI3;A0A0J9YUR5;A0A0J9YTW3;A0A0J9YVC3	C-terminal-binding protein 2;C-terminal-binding protein 1	Ctbp2;Ctbp1		45.971	+	1.97426	0.0115593	-0.904935
P58252	Elongation factor 2	Eef2	+	95.313	+	2.44649	0.0132444	0.465211
P60843	Eukaryotic initiation factor 4A-I	Eif4a1		46.153	+	3.91684	0.0142254	1.00351
P61358;A2A4Q0	60S ribosomal protein L27	Rpl27	+	15.798	+	2.33953	0.011112	0.786306
P61514;A0A1D5RL86	60S ribosomal protein L37a	Rpl37a	+	10.275	+	2.58402	0.0126262	0.514465
P61982	14-3-3 protein gamma;14-3-3 protein gamma, N-terminally processed	Ywhag		28.302	+	1.57873	0.0131362	-1.25166
P62192	26S protease regulatory subunit 4	Psmc1		49.184	+	2.07654	0.0125802	0.673457
P62301;Q921R2;A0A0U1RQ71	40S ribosomal protein S13	Rps13	+	17.222	+	3.43776	0.0110621	0.65383
P62702;V9GWY0	40S ribosomal protein S4, X isoform;40S ribosomal protein S4	Rps4x;Gm15013	+	29.597	+	2.93571	0.0125204	0.715647
P62911;P17932	60S ribosomal protein L32	Rpl32		15.86	+	1.65644	0.02118	0.535648
P62918	60S ribosomal protein L8	Rpl8	+	28.024	+	2.09318	0.0124648	0.650585
P62960;A2BGG7;A0A0A0MQD2;B2RUF0;Q9Z2C8	Nuclease-sensitive element-binding protein 1	Ybx1		35.73	+	2.65215	0.0110563	-0.714464
Z4YKV1;P63094;Q6R0H7	Guanine nucleotide-binding protein G(s) subunit alpha isoforms short;Guanine nucleotide-binding protein G(s) subunit alpha isoforms XLas	Gnas		44.178	+	1.94946	0.0139467	0.605258
P63101;D3YXN6;D3YXF4;D3YW45	14-3-3 protein zeta/delta	Ywhaz		27.771	+	2.62027	0.0114503	-1.06687
P63276	40S ribosomal protein S17	Rps17	+	15.524	+	1.95181	0.0139022	0.62379
P68033;P62737;P68134;P63268;D3YZY0;D3Z2K3;A0A1D5RM20;A0A0U1RQ96	Actin, alpha cardiac muscle 1;Actin, aortic smooth muscle;Actin, alpha skeletal muscle;Actin, gamma-enteric smooth muscle	Actc1;Acta2;Acta1;Actg2	+	42.019	+	1.12264	0.0198519	-4.66987
P70698;P70303	CTP synthase 1	Ctps1		66.682	+	1.67399	0.020907	0.571758
P80315;G5E839;G3UYW5;G3UXF3;G3UXG2	T-complex protein 1 subunit delta	Cct4		58.066	+	3.81752	0.0110595	0.596252
P80317	T-complex protein 1 subunit zeta	Cct6a		58.004	+	2.59038	0.010822	0.732122
P80318;E9Q133;Q3U0I3;F6Q609;F6ZVG8	T-complex protein 1 subunit gamma	Cct3		60.629	+	2.37438	0.0110714	0.792888
Q3TWV4;P84091	AP-2 complex subunit mu	Ap2m1		49.389	+	2.4044	0.0147297	0.438009
P84104;A2A4X6	Serine/arginine-rich splicing factor 3	Srsf3;Gm12355		19.329	+	2.05702	0.0119346	-1.54561
P97314;A0A1W2P845;A0A1W2P758;A0A1W2P6I3;A0A1W2P7N8;A0A1W2P780	Cysteine and glycine-rich protein 2	Csrp2		20.926	+	1.93584	0.0121471	1.15532
P97855	Ras GTPase-activating protein-binding protein 1	G3bp1		51.828	+	2.56809	0.01227	-0.876137
Q01149;E0CXI2	Collagen alpha-2(I) chain	Col1a2		129.56	+	3.07348	0.00833333	-5.67032
Q01320	DNA topoisomerase 2-alpha	Top2a		172.79	+	2.36941	0.0115524	0.670886
Q02566;Q91Z83;G3UW82;A2AQP0;Q1WNP4;B8JJH3	Myosin-6;Myosin-7	Myh6;Myh7		223.56	+	2.67598	0.0112286	-4.49277
Q02788;D3Z7D5	Collagen alpha-2(VI) chain	Col6a2		110.33	+	3.44718	0.0076129	-4.41892
Q04857	Collagen alpha-1(VI) chain	Col6a1		108.49	+	2.86731	0.00789474	-5.23681
Q08943;A2AW05	FACT complex subunit SSRP1	Ssrp1		80.859	+	1.43014	0.0193094	-0.963185
Q11011;F6QYF8;E9Q039;E9Q6F4;F6V7K3;F7ANF4;F2Z3V5	Puromycin-sensitive aminopeptidase	Npepps		103.32	+	1.56714	0.0213654	0.596307
Q3SYK4	Vertnin	Vrtn		83.134	+	3.72628	0.01	2.21244
Z4YKB8;Q3TEA8;Z4YKA3;A2AM65;A2AM63;A2AM62;A2AM70;A2AM69	Heterochromatin protein 1-binding protein 3	Hp1bp3		60.85	+	3.22081	0.00957447	-3.24493
Q3TFP0;Q9R0U0;A3KG57	Serine/arginine-rich splicing factor 10	Srsf10		22.135	+	1.86659	0.0116621	-2.44525
Q3U4X8;P37913;V9GWZ4;E9PV36;D3YUW4	DNA ligase;DNA ligase 1	Lig1		104.09	+	2.37727	0.0121026	0.695311
Q3U962	Collagen alpha-2(V) chain	Col5a2		145.02	+	4.04742	0.0196667	-5.62402
Q3UA06	Pachytene checkpoint protein 2 homolog	Trip13		48.376	+	3.24596	0.0132586	0.959041
Q3UH59;Q61879;Q5SV64;Q8BXF2;E9Q264	Myosin-10	Myh10		233.45	+	3.89781	0.0196667	-4.30599
Q52KC3;P49718	DNA helicase;DNA replication licensing factor MCM5	Mcm5		82.406	+	3.4233	0.0127107	0.850869
Q5EBP8;P49312;V9GXF8	Heterogeneous nuclear ribonucleoprotein A1;Heterogeneous nuclear ribonucleoprotein A1, N-terminally processed	Hnrnpa1		38.833	+	2.23683	0.0113988	-1.93756
Q5SQ20;Q9EQ61	Pescadillo homolog	Pes1		68.23	+	3.6984	0.0113931	0.671109
Q5SS83;Q60634	Flotillin-2	Flot2		47.116	+	1.46477	0.0132903	-1.95354
Q5SX75;Q60716;B0QZH3;B0QZH1;Q5SX76;B0QZH2;F6ULE1	Prolyl 4-hydroxylase subunit alpha-2	P4ha2		61.014	+	4.25979	0.0168571	-3.55311
Q5SXR6;Q68FD5;F6Z1R4	Clathrin heavy chain;Clathrin heavy chain 1	Cltc		191.98	+	4.93419	0.00972222	1.18274
Q60668;F6ZV59;E9Q5B6;F6SHF3;A0A0G2JFL4;F7A465	Heterogeneous nuclear ribonucleoprotein D0	Hnrnpd	+	38.354	+	2.48997	0.0124211	-1.79255
Q60715	Prolyl 4-hydroxylase subunit alpha-1	P4ha1		60.909	+	3.14515	0.00978261	-3.83389
Q60749;Q9WU01;A0A087WSL3;A0A087WR32;Q9R226	KH domain-containing, RNA-binding, signal transduction-associated protein 1	Khdrbs1		48.37	+	2.52875	0.0108778	-1.11954
Q60865;F6YLI0;A2BH47;F6YP03	Caprin-1	Caprin1		78.168	+	1.63481	0.0166734	-0.772125
Q60I23;P48432;Q811W0;P53783;S4R1I8;A2AM37;Q04892;P53784;Q62247;P43267	Transcription factor SOX-2	Sox2		34.406	+	1.03649	0.0271929	-1.94997
Q61024;D3Z0C2;D3YYR0;D3Z028	Asparagine synthetase [glutamine-hydrolyzing]	Asns		64.282	+	1.71041	0.0127744	-1.05898
Q61171;D3Z4A4	Peroxiredoxin-2	Prdx2		21.778	+	1.26784	0.0426888	0.555447
Q61245;E9PVT8;V9GWX8	Collagen alpha-1(XI) chain	Col11a1		181.03	+	2.46585	0.0109412	-3.62328
Q61263;A0A087WNN8;A0A087WSJ5	Sterol O-acyltransferase 1	Soat1		63.798	+	4.45178	0.0236	3.53708
Q61330;A0A087WQQ9	Contactin-2	Cntn2		113.22	+	2.61845	0.0114773	-2.97162
Q61554	Fibrillin-1	Fbn1		312.3	+	3.08433	0.0108889	-2.31873
Q61555	Fibrillin-2	Fbn2		313.82	+	2.15134	0.0115524	-3.84423
Q61881;D3Z6N3;D3Z0J6;D3Z2K9;D3Z335	DNA replication licensing factor MCM7	Mcm7		81.21	+	1.91681	0.0212261	0.431139
Q62009;CON__Q2KJC7;F7C9H0	Periostin	Postn		93.142	+	2.57111	0.0129231	-2.39432
Q62167;Q3V086;Q61496	ATP-dependent RNA helicase DDX3X	Ddx3x		73.101	+	2.82513	0.0118849	1.09129
Q62266	Cornifin-A	Sprr1a		15.765	+	2.76044	0.0134667	-2.72634
Q62315;G3UZT8;G3UZW3	Protein Jumonji	Jarid2		137.44	+	3.31907	0.0117442	-1.20877
Q62351;Q8C872	Transferrin receptor protein 1	Tfrc		85.73	+	2.52626	0.0125152	-1.68637
Q640M1;Q6EJB6;E9Q9S3	U3 small nucleolar RNA-associated protein 14 homolog A	Utp14a		87.264	+	3.31981	0.0113913	1.49997
Q64737;D6RCG1	Trifunctional purine biosynthetic protein adenosine-3;Phosphoribosylamine--glycine ligase;Phosphoribosylformylglycinamidine cyclo-ligase;Phosphoribosylglycinamide formyltransferase	Gart		107.5	+	2.10974	0.0118849	0.884196
Q6J1H4;Q148W8	Undifferentiated embryonic cell transcription factor 1	Utf1		36.407	+	3.64317	0.00921053	-2.18943
Q6NVD0	FRAS1-related extracellular matrix protein 2	Frem2		350.64	+	2.52489	0.0128167	-1.94366
Q6P3E7;D3Z7T4	Histone deacetylase 10	Hdac10		72.108	+	2.7175	0.0120649	-1.0599
Q6P4T2	U5 small nuclear ribonucleoprotein 200 kDa helicase	Snrnp200		244.54	+	4.54287	0.012625	0.781712
Q6PFB2;Q8VE37;A2CER2	Regulator of chromosome condensation	Rcc1		46.374	+	2.58774	0.0103061	-2.74402
Q6ZQ73	Cullin-associated NEDD8-dissociated protein 2	Cand2		135.63	+	3.05612	0.0138356	1.77172
Q6ZQL4	WD repeat-containing protein 43	Wdr43		75.38	+	1.24808	0.0198782	-1.66571
Q6ZWN5;F7CJS8;D3YWH9;Q9CXW7;D3Z673;D3YUV6	40S ribosomal protein S9	Rps9	+	22.591	+	1.67568	0.0242088	0.475693
Q6ZWV3;I7HLV2	60S ribosomal protein L10	Rpl10	+	24.604	+	2.95153	0.0112529	0.822863
Q6ZWV7;G3UWD7;F6XS56;F6YXU0;Q3U1U4	60S ribosomal protein L35	Rpl35;Gm10269	+	14.552	+	1.49025	0.013827	1.33786
Q7TMB8;A0A0R4J119;A0A0U1RQ05;F6QD74;G3UZI5	Cytoplasmic FMR1-interacting protein 1	Cyfip1		145.24	+	2.88444	0.0117163	1.02464
Q7TPV4	Myb-binding protein 1A	Mybbp1a		152.04	+	2.07373	0.016801	0.486778
Q80WJ7;F6QHD1;F6ZQL0;E9PUX0;F6ZSG0;F6QFT1	Protein LYRIC	Mtdh		63.845	+	1.31608	0.0208126	-1.08569
Q80X41	Serine/threonine-protein kinase VRK1	Vrk1		49.74	+	3.46703	0.0103939	1.45907
Q80YR5;F6XJ79;F6Z0Y5;F6WIZ2;D6RHP9;D6RJ78;F6VRR0	Scaffold attachment factor B2	Safb2		111.84	+	1.27565	0.0234123	-0.943593
Q8BGJ5;Q922I7;Q8CB58;P17225;E9QMW9;E9Q279;F7DCW4;F7AXP1;E9PZ39;G3UY95;A0A1W2P7W3;B2RU80	Polypyrimidine tract-binding protein 1	Ptbp1		56.891	+	2.0994	0.0126667	-0.715747
Q8BGS0	Protein MAK16 homolog	Mak16		35.185	+	1.72576	0.0118423	-1.80462
Q8BHX3;E9Q2C7	Borealin	Cdca8		32.214	+	2.46651	0.0111157	0.773436
Q8BK35		Gltscr2		55.792	+	4.58982	0.0214545	2.21047
Q8BP47	Asparagine--tRNA ligase, cytoplasmic	Nars		64.279	+	2.46712	0.0151959	-0.412568
Q8BW10;E9PW56	RNA-binding protein NOB1	Nob1		45.463	+	1.32948	0.0206264	1.00758
Q8BX22;A2AUZ7;A2AUZ6	Sal-like protein 4	Sall4		113.11	+	2.09842	0.0124569	1.72976
Q8C605;Q9WUA3;F6YL81;D3YUA3	ATP-dependent 6-phosphofructokinase;ATP-dependent 6-phosphofructokinase, platelet type	Pfkp		85.546	+	2.8124	0.012237	-1.18204
Q8C6P8;G3UYC1;G3UY05;H3BL53;G3UYK1	Zinc finger protein 57	Zfp57		47.958	+	2.492	0.0115045	-0.820546
Q8C9H6;E9QN41;Q8C079	Striatin-interacting proteins 2	Strip2		96.293	+	1.15359	0.0231872	1.58154
Q8CCF0	U4/U6 small nuclear ribonucleoprotein Prp31	Prpf31		55.429	+	1.82497	0.0132078	0.748768
Q8CI11	Guanine nucleotide-binding protein-like 3	Gnl3		60.786	+	4.00541	0.0129487	0.928946
Q8CI94;Q9ET01;Q3UEJ6	Glycogen phosphorylase, brain form	Pygb		96.729	+	1.71837	0.0113878	-3.30358
Q8K297	Procollagen galactosyltransferase 1	Colgalt1		71.06	+	2.24468	0.0126066	-4.26616
Q8K301	Probable ATP-dependent RNA helicase DDX52	Ddx52		67.473	+	3.10642	0.0113837	0.761677
Q8K310;A0A087WSU2;A0A087WSP7;A0A087WQZ1;A0A087WQD6;A0A087WQ54;A0A087WNW7;A0A087WNP3;A0A087WPU5;A0A087WPQ5;A0A087WQP4;A0A087WSF8	Matrin-3	Matr3		94.629	+	2.40461	0.0262909	-0.305571
Q8K411	Presequence protease, mitochondrial	Pitrm1		117.37	+	3.36203	0.0107447	1.12311
Q8R326;F7D909	Paraspeckle component 1	Pspc1		58.758	+	1.50947	0.0133184	-1.42815
Q8R3N1	Nucleolar protein 14	Nop14		98.768	+	2.96294	0.0105208	1.54534
Q8VCG3;A0A1B0GS18;Q3UL50	WD repeat-containing protein 74	Wdr74		42.636	+	1.3277	0.0141379	-2.56741
Q8VDD5;F2Z494	Myosin-9	Myh9		226.37	+	3.51786	0.00813953	-2.26701
Q8VDM4;E9Q2S8	26S proteasome non-ATPase regulatory subunit 2	Psmd2		100.2	+	1.84417	0.0289942	0.371951
Q8VE73;F6Q1R4;E9Q6H4;E9QP09;S4R1Y1;Q80TT8	Cullin-7	Cul7		192.29	+	2.30899	0.0112083	0.905324
Q8VI84	Nucleolar complex protein 3 homolog	Noc3l		93.21	+	2.03965	0.0113151	0.862734
Q8VIJ6;E9Q2M5	Splicing factor, proline- and glutamine-rich	Sfpq		75.441	+	1.95693	0.012209	-2.32875
Q91VM5;A0A087WPK1;E9QM14;A0A087WSE1;Q9JIY2;Q8CGF7;Q9ESC8	RNA binding motif protein, X-linked-like-1	Rbmxl1		42.161	+	1.82037	0.0112955	-2.03141
Q91WM3	U3 small nucleolar RNA-interacting protein 2	Rrp9		52.106	+	4.12649	0.01475	-3.90004
Q91ZW3;Q6PGB8;F6Z6F4;Q8BS67	SWI/SNF-related matrix-associated actin-dependent regulator of chromatin subfamily A member 5	Smarca5		121.63	+	2.37326	0.01125	0.800681
Q921N6;H3BLJ6	Probable ATP-dependent RNA helicase DDX27	Ddx27		85.938	+	3.19082	0.0130182	1.03769
Q922D8;A0A1W2P733;A0A1W2P7L5	C-1-tetrahydrofolate synthase, cytoplasmic;Methylenetetrahydrofolate dehydrogenase;Methenyltetrahydrofolate cyclohydrolase;Formyltetrahydrofolate synthetase;C-1-tetrahydrofolate synthase, cytoplasmic, N-terminally processed	Mthfd1		101.2	+	1.90411	0.0133557	0.691355
Q922F4	Tubulin beta-6 chain	Tubb6	+	50.09	+	2.34866	0.0111925	0.760571
Q922Q8	Leucine-rich repeat-containing protein 59	Lrrc59		34.877	+	1.15616	0.0239468	-1.273
Q922U1;E0CYD0;F6T4V0	U4/U6 small nuclear ribonucleoprotein Prp3	Prpf3		77.454	+	3.23273	0.0127857	0.998421
Q99020;Q80XR6;Q20BD0	Heterogeneous nuclear ribonucleoprotein A/B	Hnrnpab	+	30.831	+	2.17462	0.0106995	-1.88386
Q99JF8;A2BI12;F6RB63;F6W677;Q9JMG7;P51859	PC4 and SFRS1-interacting protein	Psip1		59.696	+	2.41273	0.0115858	-1.36485
Q99K41	EMILIN-1	Emilin1		107.58	+	2.92226	0.00865385	-5.40448
Q99K48;B1AXT0	Non-POU domain-containing octamer-binding protein	Nono		54.54	+	2.08804	0.0118551	-1.57045
Q99KI0	Aconitate hydratase, mitochondrial	Aco2		85.462	+	1.76774	0.0133294	-0.881439
Q99LH1;B1ASC2	Nucleolar GTP-binding protein 2	Gnl2		83.345	+	2.96719	0.0113483	1.6097
Q99LX0;A2A813;A2A815;A2A817;A2A816	Protein deglycase DJ-1	Park7		20.021	+	2.8775	0.010202	-1.63887
Q99ME9	Nucleolar GTP-binding protein 1	Gtpbp4		74.112	+	3.34749	0.0127848	-1.26972
Q99PV0;B7ZC27	Pre-mRNA-processing-splicing factor 8	Prpf8		273.61	+	2.31036	0.0144639	0.451463
Q9CPN8	Insulin-like growth factor 2 mRNA-binding protein 3	Igf2bp3		63.574	+	4.00218	0.0131453	0.708203
Q9CR62;Q5SX46;Q5SX48	Mitochondrial 2-oxoglutarate/malate carrier protein	Slc25a11		34.155	+	1.58173	0.0169777	-0.812962
Q9CWR8;D3YUQ4	DNA (cytosine-5)-methyltransferase 3-like	Dnmt3l		47.992	+	3.32686	0.00897436	-3.23042
Q9CXW4;E9PYL9;A2BH06	60S ribosomal protein L11	Rpl11;Gm10036	+	20.252	+	2.54641	0.0145661	0.414331
Q9CZX0	Elongator complex protein 3	Elp3		62.384	+	1.73071	0.0132813	0.859446
Q9CZX8;D3YUT3;D3Z5R8;D3Z722;D3YUG3;S4R223	40S ribosomal protein S19	Rps19	+	16.085	+	3.50862	0.0075	-1.52438
Q9D0B0;F6RTE1	Serine/arginine-rich splicing factor 9	Srsf9		25.661	+	1.2649	0.0157462	-2.97941
Q9D0D4	Probable dimethyladenosine transferase	Dimt1		35.274	+	2.46854	0.01107	0.763264
Q9D0R4;Q5SVX2	Probable ATP-dependent RNA helicase DDX56	Ddx56		61.211	+	4.79291	0.0124211	1.64663
Q9D0T1;E9PZS4	NHP2-like protein 1;NHP2-like protein 1, N-terminally processed	Nhp2l1		14.173	+	2.49563	0.0123046	-1.3981
Q9D8M4	60S ribosomal protein L7-like 1	Rpl7l1	+	28.543	+	2.98611	0.0129244	1.12116
Q9DAE2		Rbmxl2		41.912	+	2.00232	0.0109787	-2.78217
Q9DAW6	U4/U6 small nuclear ribonucleoprotein Prp4	Prpf4		58.369	+	2.39156	0.0112511	0.88002
Q9DB96	Neuroguidin	Ngdn		35.658	+	2.66908	0.0112018	0.712358
Q9DBE9	pre-rRNA processing protein FTSJ3	Ftsj3		95.531	+	2.67146	0.0120156	1.45027
Q9DBY8	Nuclear valosin-containing protein-like	Nvl		94.475	+	1.44193	0.0245743	0.607353
Q9DC33	High mobility group protein 20A	Hmg20a		39.917	+	1.17275	0.0278748	-0.945712
Q9JIK5	Nucleolar RNA helicase 2	Ddx21		93.55	+	3.78818	0.0102941	-2.1416
Q9QWT9;E9PUA5;G3UXN2;G3UX22	Kinesin-like protein KIFC1;Kinesin-like protein	Kifc1;Kifc5b		74.152	+	1.64918	0.0261851	0.455493
Q9QZF2	Glypican-1;Secreted glypican-1	Gpc1		61.359	+	1.60753	0.0119278	-3.31924
Q9R0E2;A8Y5E6;F6WNR1	Procollagen-lysine,2-oxoglutarate 5-dioxygenase 1	Plod1		83.594	+	2.06563	0.0118344	-3.82616
Q9R0N0	Galactokinase	Galk1		42.295	+	1.97189	0.0121043	2.02693
Q9Z0R9	Fatty acid desaturase 2	Fads2		52.387	+	2.58747	0.0125041	1.67081
Q9Z0W3	Nuclear pore complex protein Nup160	Nup160		158.23	+	1.77914	0.011934	1.16879
Q9Z1D1	Eukaryotic translation initiation factor 3 subunit G	Eif3g		35.638	+	1.70503	0.0199586	0.566931
Q9Z1X4;Q45VK5;A0A1L1SQR7;A0A1L1ST48;A0A1L1SU19;A0A1L1SSU8;A0A1L1SR62;A0A1L1SQ69	Interleukin enhancer-binding factor 3	Ilf3		96.02	+	1.66951	0.0179029	-0.674443
Q9Z204;A0A1D5RLK6;A0A1D5RMF0;A0A1D5RLM5;Q8BTF8	Heterogeneous nuclear ribonucleoproteins C1/C2	Hnrnpc	+	34.384	+	1.97055	0.010943	-1.22635
Q9Z277	Tyrosine-protein kinase BAZ1B	Baz1b		170.65	+	2.89116	0.0117405	1.12531
Q9Z2V5;A0A1B0GX25;B1AUA8;B1AUA9	Histone deacetylase 6	Hdac6		125.79	+	2.98671	0.0120584	-0.985665
Q9Z2Z9	Glutamine--fructose-6-phosphate aminotransferase [isomerizing] 2	Gfpt2		77.008	+	3.32155	0.0132895	1.32477
A0A087WQF8;A0A087WP48;A0A087WS04;A0A087WS29;A0A087WQG4;A0A087WQD0;A0A087WNW3;A0A087WQI3;A0A087WPW5;A0A087WS23;A0A087WQ25;A0A087WRS1;A0A087WQQ5;A0A087WP85;A0A087WP14;A0A087WPX0;F8VQC7;A0A087WR91;A0A087WPY8		Ktn1		137.63	+	2.7165	0.0119707	0.767518
A0A087WQS2;Q9CQC6;A0A087WPF9;A0A087WS48	Basic leucine zipper and W2 domain-containing protein 1	Bzw1		51.209	+	1.11356	0.0214593	2.65108
A0A0A6YWR8;E9PVG7;A0A0A6YW53;P97820;B7ZNR9;B2RUE8;F8VPL5;A0A0A6YWM8;A0A0A6YXE5;A0A0A6YVR7;E0CZF8;E0CZD7;E0CXD6;E0CY98;E9PUL9;Q5SXG1;Q5SXG3;G3X9G2;B9EKN8;B2RQ80;Q9JM52;P83510;A0A0A6YWJ2;A0A0A6YVZ8;F7AMS7;E0CYV5	Mitogen-activated protein kinase kinase kinase kinase 4	Map4k4		140.81	+	3.21976	0.01	1.1638
K3W4P2;A0A0G2JH17;Q6P4S8;A0A0G2JDG8	Integrator complex subunit 1	Ints1		247.71	+	2.28655	0.0166316	0.436422
B9EJ54;A0A0J9YUD5;E9Q880		Nup205		227.46	+	2.34532	0.0118216	0.728395
A0A0J9YUH8				8.8338	+	1.03088	0.0332161	1.55931
A0A0J9YV20;A0A0R4J0B7;Q80UZ2	Protein SDA1 homolog	Sdad1		79.458	+	2.19604	0.0112765	0.726505
A0A0N4SUH4;Q8BKS9	Pumilio domain-containing protein KIAA0020	Kiaa0020		72.93	+	4.56352	0.0157333	2.12186
A0A0R4J0G0;Q8BH04	Phosphoenolpyruvate carboxykinase [GTP], mitochondrial	Pck2		73.417	+	1.90991	0.0110277	-1.47444
Z4YL78;A0A0R4J0K2;K3W4R5;A2AGT5	Cytoskeleton-associated protein 5	Ckap5		218.71	+	1.54969	0.0132515	1.40946
A0A0R4J0L6;Q8BJZ4	28S ribosomal protein S35, mitochondrial	Mrps35	+	35.917	+	3.05433	0.00833333	3.4825
A0A0R4J170;Q3TKT4;G3UX35;F2Z4A9;H3BLH0;Q6DIC0;E9QAB8;H3BJK2;H3BKN5;H3BJM2;A0A140LJK1;A0A140LIV3;A0A140LHZ8;H3BJI1;H3BLI4;A0A140LHE2;A0A140LIQ9;Q9D007;A0A140LI14;H3BKJ3;A0A140LIM0;A0A140LID0;H3BK47;A0A140LHP6;A0A140LHF4	Transcription activator BRG1	Smarca4		181.85	+	2.46472	0.0131744	0.477776
A0A0R4J187;P23475;E9Q0B8;E9PZD4;E9Q163;E9Q4A4	X-ray repair cross-complementing protein 6	Xrcc6		69.484	+	2.76732	0.0119871	-1.01314
A0A0R4J260;B2RRE7	OTU domain-containing protein 4	Otud4		122.93	+	2.24161	0.0114529	1.05223
A0A140LHA2;Q9WVA3;A0A140LJ21;A0A140LIM5;A0A140LI47	Mitotic checkpoint protein BUB3	Bub3		36.766	+	1.83934	0.013984	0.678091
A0A1L1STQ1;A0A1L1SSG7;A0A1L1STZ1;A0A1L1SU22;Q9D1P4	Cysteine and histidine-rich domain-containing protein 1	Chordc1		12.909	+	1.51083	0.0124702	1.75831
A2AF47;A2AF67;A2AF65;A0A1D5RM88;A0A1D5RLE0;E9QMR2;A0A1D5RMM1;F8VPN7;Q8BIK4	Dedicator of cytokinesis protein 11	Dock11		237.77	+	2.68288	0.0108602	2.39086
A2AH85;O08810;G3UZ34;G3UXK8	116 kDa U5 small nuclear ribonucleoprotein component	Eftud2		109.49	+	1.78763	0.0213598	0.479397
A2AJI1;A8Y5P4;A2AJI0;F6WF36	MAP7 domain-containing protein 1	Map7d1		85.763	+	1.46503	0.0262379	0.558605
A2BE93;Q9EQU5;A2BE92	Protein SET	Set		24.923	+	0.896632	0.044784	2.67233
B1AU75;Q99MD9;B1AU76	Nuclear autoantigenic sperm protein	Nasp		84.012	+	2.32528	0.0121619	1.07192
B1AWE0;Q6PFA2;B1AWE1;B1AWD8;B1AWD9;O08585	Clathrin light chain A	Clta		23.478	+	2.43861	0.0116125	1.40982
B1AZI6;F6SBF2;Q8C690;E9Q5E2	THO complex subunit 2	Thoc2		182.77	+	1.12328	0.0246245	1.46364
E9QAI5;B2RQC6;G3UWN2;E9QAT6;F6S3Z3	CAD protein;Glutamine-dependent carbamoyl-phosphate synthase;Aspartate carbamoyltransferase;Dihydroorotase	Cad		236.25	+	3.46263	0.0120238	1.1134
B7FAV1;B7FAU9;Q8BTM8;F6XC15;Q8VHX6;F6Z2C0;J3JS91	Filamin-A	Flna		274.63	+	2.18895	0.012546	0.653049
B7ZNH7;K3W4R4;Q80X19	Collagen alpha-1(XIV) chain	Col14a1		192.75	+	2.20029	0.0119103	-2.38754
D3YUP1;Q9WVG6;D6RFA7	Histone-arginine methyltransferase CARM1	Carm1		70.322	+	2.12568	0.0116749	0.84207
D3Z3E8;E9PW39;D3YVL0;P23249	Putative helicase MOV-10	Mov10		113.6	+	4.16417	0.0138824	-2.45734
D3YYT1;Q922P9	Putative oxidoreductase GLYR1	Glyr1		60.435	+	1.67227	0.0152347	0.763241
D3Z0M9		Ddx23		95.493	+	3.56255	0.0102388	-1.3501
D3Z7M5;Q9CPT5;D6RDE0	Nucleolar protein 16	Nop16		21.508	+	3.58912	0.0123171	1.04559
E9PVA8		Gcn1l1		293.02	+	2.34155	0.0118	0.697978
Q3TT92;E9PWE8;Q62188;D3YUS0;D3Z567	Dihydropyrimidinase-related protein 3	Dpysl3		61.779	+	1.13374	0.0207191	-2.87244
F8WHY8;E9PX23;Q8K4B0;Q3U3A7;E9Q794;Q3UII8;Q924K8;H3BLE1	Metastasis-associated protein MTA1;Metastasis-associated protein MTA3	Mta1;Mta3		79.189	+	2.28161	0.0114325	0.708146
E9PYI1;A0A140LJ91		Zfp568		77.116	+	2.54523	0.012715	0.943975
E9Q718;Q9R0B9	Procollagen-lysine,2-oxoglutarate 5-dioxygenase 2	Plod2		86.9	+	1.57412	0.0132128	-1.30951
G3X9V2;E9Q8Z5;E9Q8Z6;E9Q8Z8;P30999;E9Q986;D3Z7H6;E9Q906;E9Q907;E9Q905;E9Q8Z4;E9Q8Z9;D3Z2H2;E9Q903;E9Q901;E9Q904;D3Z2H7	Catenin delta-1	Ctnnd1		104.1	+	2.24069	0.0117403	0.6486
E9QAS4;E9QAS5;Q6PDQ2;E9PYU4;E9PYL1;A2A8L1;F6WR45;F6V4V3	Chromodomain-helicase-DNA-binding protein 4	Chd4		216.37	+	1.86707	0.0237992	0.412434
E9QAT0;Q6AXB7;P35922;D3Z6U8;E9QNF5;E9QAS8;E9QAS9	Fragile X mental retardation protein 1 homolog	Fmr1		66.169	+	2.34777	0.0111257	-1.5205
F2Z456;Q9DCN2;A0A0A0MQM3	NADH-cytochrome b5 reductase;NADH-cytochrome b5 reductase 3;NADH-cytochrome b5 reductase 3 membrane-bound form;NADH-cytochrome b5 reductase 3 soluble form	Cyb5r3		34.929	+	1.31778	0.0266151	-0.693431
G3UX26;Q60930;D3YZT5;D3YUN8	Voltage-dependent anion-selective channel protein 2	Vdac2		30.446	+	1.82094	0.0177463	0.580481
G3UYV7;P62858;J3QNN8	40S ribosomal protein S28	Rps28	+	6.3442	+	3.37786	0.0121471	0.798679
G3UZA0;Q8BGA5	KRR1 small subunit processome component homolog	Krr1		36.66	+	1.61118	0.0161566	-0.811378
G5E866;Q99NB9;A0A087WNS2	Splicing factor 3B subunit 1	Sf3b1		145.83	+	2.98429	0.011354	0.475657
H3BJU7;H3BJX8;H3BJ45;H3BJ40;H3BKH9;Q60875;H3BL15;H3BLF9;H3BJ59;H3BLJ1;H3BIX8;H3BJM4;H3BJ48	Rho guanine nucleotide exchange factor 2	Arhgef2		108.59	+	1.5428	0.0171535	0.87016
H3BL37;O08784;H3BIX0;F6R3V4;H3BK88	Treacle protein	Tcof1		138.55	+	1.71995	0.0118947	-1.33206
O35646	Calpain-6	Capn6		74.542	+	1.37107	0.0146146	1.7632
O70126	Aurora kinase B	Aurkb		39.384	+	1.53301	0.0238491	0.566317
O70194	Eukaryotic translation initiation factor 3 subunit D	Eif3d		63.988	+	1.95511	0.0125031	0.747717
Q564E2;P06151;A0A1B0GSX0;A0A1B0GSR9;D3YZQ9;A0A1B0GT41;A0A1B0GQX5;A0A1B0GSL7;A0A1B0GRW9;A0A1B0GS79;A0A1B0GRC1;A0A1B0GRS2;D3YVR7;D3YZE4;P00342;A0A1B0GSR2;A0A1B0GRE9	L-lactate dehydrogenase;L-lactate dehydrogenase A chain	Ldha		36.498	+	3.79256	0.0124032	0.728419
P07742	Ribonucleoside-diphosphate reductase large subunit	Rrm1		90.209	+	2.00576	0.0113009	1.53008
P10107	Annexin A1	Anxa1		38.734	+	1.48353	0.0125826	-2.02578
P11499;E9Q3D6;E9PX27;D3Z1R1;E9Q0C3	Heat shock protein HSP 90-beta	Hsp90ab1		83.28	+	2.80101	0.0109847	0.582241
P14206;A0A1L1SUK3;A0A1L1SRW0	40S ribosomal protein SA	Rpsa	+	32.838	+	3.07733	0.0121102	1.00272
P19253;A0A1B0GSQ6;A0A1B0GS68;A0A1B0GSB2;A0A1B0GTA1;A0A1B0GSC2;A0A1B0GT00;A0A1B0GQW6;A0A1B0GRH1;A0A1B0GSF0;A0A1B0GSL5;A0A1B0GSJ2	60S ribosomal protein L13a	Rpl13a	+	23.464	+	3.85339	0.0130339	0.737581
P23116	Eukaryotic translation initiation factor 3 subunit A	Eif3a		161.93	+	2.13551	0.01176	0.723054
Q9DCC5;P23198;D3Z313;D3Z1A9	Chromobox protein homolog 3	Cbx3		20.811	+	2.4818	0.0118389	0.573326
P25444;D3YVC1;D3YWJ3;A0A140T8L5;J3QMG5;E9Q1N8;F6YTZ4;D3Z536	40S ribosomal protein S2	Rps2;Gm5786;Gm18025;Gm6576	+	31.231	+	1.76357	0.016885	0.642114
P27641	X-ray repair cross-complementing protein 5	Xrcc5		83.056	+	2.92557	0.0100882	-2.67102
P61294;P35279;A0A1L1SRS6;D3YV69;Q8BHD0	Ras-related protein Rab-6B;Ras-related protein Rab-6A;Ras-related protein Rab-39A	Rab6b;Rab6a;Rab39a		23.461	+	1.43561	0.0363667	0.484071
P35550;A0A140LIR6	rRNA 2-O-methyltransferase fibrillarin	Fbl		34.306	+	3.54826	0.0101	0.963249
P35585;A0A1L1SUA0;A0A0R4IZX6;A0A0R4J1L4;Q9WVP1	AP-1 complex subunit mu-1;AP-1 complex subunit mu-2	Ap1m1;Ap1m2		48.542	+	1.42171	0.0129486	2.17391
P35700;B1AXW5;B1AXW6;B1AXW4	Peroxiredoxin-1	Prdx1		22.176	+	1.39535	0.0264232	0.612513
P43275	Histone H1.1	Hist1h1a		21.785	+	1.99424	0.0127774	0.770856
P43276	Histone H1.5	Hist1h1b		22.576	+	2.76377	0.011	0.917237
Q3ULB1;Q921W7;P47226;B1AXB9;D6RH72;A2ALC6	Testin	Tes;Gm4907		46.586	+	1.20591	0.0240581	1.07427
P48962;Q3V132	ADP/ATP translocase 1	Slc25a4		32.904	+	2.15068	0.0117785	-0.700264
P50247;A2ALT5	Adenosylhomocysteinase	Ahcy		47.688	+	2.20888	0.0123939	1.36565
P53986	Monocarboxylate transporter 1	Slc16a1		53.267	+	3.33246	0.009375	2.66749
P53996;A0A0N4SVS6;Q9D548	Cellular nucleic acid-binding protein	Cnbp		19.592	+	2.59595	0.0126495	0.897973
P60229	Eukaryotic translation initiation factor 3 subunit E	Eif3e		52.22	+	1.34586	0.026668	0.658899
P61222	ATP-binding cassette sub-family E member 1	Abce1		67.314	+	2.13812	0.0111528	1.17819
P62259;D6REF3;F6WA09	14-3-3 protein epsilon	Ywhae		29.174	+	1.60087	0.0145766	-0.898624
P62334	26S protease regulatory subunit 10B	Psmc6		44.172	+	2.33464	0.0126584	0.570222
P62754	40S ribosomal protein S6	Rps6	+	28.68	+	3.07888	0.0113931	0.469915
P62843;D3YTQ9;F7ANJ3	40S ribosomal protein S15	Rps15	+	17.04	+	1.95356	0.0130983	0.677214
P62908;D3YV43;A0A140LI77	40S ribosomal protein S3	Rps3	+	26.674	+	2.2256	0.0145013	0.473438
P63037;B1AXY1;B1AXY0;B1AXX9	DnaJ homolog subfamily A member 1	Dnaja1		44.868	+	2.54884	0.010856	0.682223
P68040	Guanine nucleotide-binding protein subunit beta-2-like 1;Guanine nucleotide-binding protein subunit beta-2-like 1, N-terminally processed	Gnb2l1		35.076	+	2.87419	0.0118784	0.979371
P70279;A2ALA0	Surfeit locus protein 6	Surf6		41.234	+	1.26889	0.0260688	0.806433
P80316;E0CZA1	T-complex protein 1 subunit epsilon	Cct5		59.623	+	2.8914	0.0113179	0.855059
P83870	PHD finger-like domain-containing protein 5A	Phf5a		12.405	+	2.0693	0.011125	2.93528
P97351	40S ribosomal protein S3a	Rps3a		29.885	+	2.27991	0.0130605	0.52405
P97379;A0A0J9YUY8;A0A0J9YTQ8	Ras GTPase-activating protein-binding protein 2	G3bp2		54.087	+	1.85201	0.0117163	-1.27399
Q00PI9	Heterogeneous nuclear ribonucleoprotein U-like protein 2	Hnrnpul2	+	84.939	+	3.33205	0.0110989	-1.16882
Q03147;Q8BWQ5	Cyclin-dependent kinase 7	Cdk7		38.968	+	1.88252	0.0122201	2.92741
Q3THK7	GMP synthase [glutamine-hydrolyzing]	Gmps		76.723	+	4.63363	0.00818182	1.0318
Q3TVK3;Q9Z2W0;Q8BPW9;A0A087WS31;A0A087WSE6;A0A087WRC1;A0A087WSU0;A0A087WNX3;A0A087WSD3	Aspartyl aminopeptidase	Dnpep		52.466	+	3.45977	0.0123284	-0.791669
Q3U9G9;A0A0A6YW01;A0A0A6YXT6;A0A0A6YXW3;A0A0A6YY12;A0A0A6YWS3	Lamin-B receptor	Lbr		71.439	+	1.85448	0.0240452	0.407611
Q3UL36;A0A140LIS5;Q8CIS0	Arginine and glutamate-rich protein 1	Arglu1		32.887	+	1.88907	0.0109145	-1.95583
Q3V117;Q91V92;Q3TS02	ATP-citrate synthase	Acly		120.79	+	2.18953	0.0112348	0.893349
Q3V4D5;B1AUY9;B1AUZ1;B1AUY7;Q9QY36;B1AUY8;Q3UX61	N-alpha-acetyltransferase 10;N-alpha-acetyltransferase 11	Naa10;Naa11		24.821	+	1.82192	0.0127375	0.962399
Q5F2E7	Nuclear fragile X mental retardation-interacting protein 2	Nufip2		75.656	+	2.31897	0.0123317	-1.13465
Q5SUW3;Q60760;B1ATS8;B1ATS7;Q5SUW0	Growth factor receptor-bound protein 10	Grb10		62.258	+	1.84222	0.0112048	1.84441
Q5SWN2;Q8VEE4	Replication protein A 70 kDa DNA-binding subunit;Replication protein A 70 kDa DNA-binding subunit, N-terminally processed	Rpa1		71.413	+	3.58345	0.0104124	-0.966553
Q60596	DNA repair protein XRCC1	Xrcc1		68.97	+	1.13545	0.027698	-1.08396
Q61553;A0A0G2JDU7;F7BDR1	Fascin	Fscn1		54.507	+	1.31823	0.0277525	0.666427
Q61753;F6ZSB7	D-3-phosphoglycerate dehydrogenase	Phgdh		56.585	+	1.7895	0.0159747	-0.638007
Q62376;A0A1B0GRR8;A0A1B0GSX5;A0A1B0GR50;A0A1B0GR44;A0A1B0GR69;A0A1B0GRV8	U1 small nuclear ribonucleoprotein 70 kDa	Snrnp70		51.991	+	1.09313	0.0284756	-1.28514
Q6DFW4;A0A0A0MQ76;A0A087WQ46;A0A087WSU5;A0A087WP00;A0A087WSL8;A0A087WNW0	Nucleolar protein 58	Nop58		60.342	+	2.69058	0.0107764	0.684422
Q6P1F6;Q6ZWR4;G3UXS9;Q8BG02	Serine/threonine-protein phosphatase 2A 55 kDa regulatory subunit B alpha isoform;Serine/threonine-protein phosphatase 2A 55 kDa regulatory subunit B beta isoform	Ppp2r2a;Ppp2r2b		51.691	+	1.63973	0.0139781	0.9546
Q6P542	ATP-binding cassette sub-family F member 1	Abcf1		94.944	+	1.11901	0.0431658	-0.748404
Q6P5B0	RRP12-like protein	Rrp12		143.13	+	3.17628	0.0113151	0.822611
Q6ZWY3;D6RH49;D3YYB0	40S ribosomal protein S27-like;40S ribosomal protein S27	Rps27l	+	9.4771	+	1.5221	0.0191259	0.783092
Q7TND5;A0A0G2JEG7;A0A0G2JFR7	Ribosome production factor 1	Rpf1		40.036	+	2.86476	0.0106316	-1.74209
Q7TT37	Elongator complex protein 1	Ikbkap		149.58	+	2.52525	0.0117696	0.816448
Q80X90	Filamin-B	Flnb		277.82	+	2.05286	0.0108984	1.11619
Q8BFY9;Q3TKD0;J3QMX2;Q99LG2;E9PV58;A0A1B0GT37	Transportin-1	Tnpo1		102.36	+	1.69908	0.0193286	0.605454
Q8BH07	ADP-ribosylation factor-like protein 6-interacting protein 6	Arl6ip6		24.908	+	1.09732	0.022444	-2.69468
Q8BH95	Enoyl-CoA hydratase, mitochondrial	Echs1		31.474	+	1.32116	0.0376573	0.560206
Q8BJH1	Zinc finger C2HC domain-containing protein 1A	Zc2hc1a		35.152	+	2.10441	0.01116	1.06998
Q8BL97	Serine/arginine-rich splicing factor 7	Srsf7		30.817	+	1.81705	0.0109412	-1.87616
Q8BMK4	Cytoskeleton-associated protein 4	Ckap4		63.691	+	3.19248	0.0109783	-1.28182
Q8BMS1	Trifunctional enzyme subunit alpha, mitochondrial;Long-chain enoyl-CoA hydratase;Long chain 3-hydroxyacyl-CoA dehydrogenase	Hadha		82.669	+	1.752	0.0188434	-0.588722
Q8BTI8;A0A087WRX8;A0A087WPS9	Serine/arginine repetitive matrix protein 2	Srrm2		294.84	+	1.97404	0.0130737	0.682889
Q8BWT1	3-ketoacyl-CoA thiolase, mitochondrial	Acaa2		41.829	+	1.25862	0.0213128	-1.15482
Q8CH25;A0A1L1STF9;A0A1L1SRL0	SAFB-like transcription modulator	Sltm		116.92	+	1.45374	0.0214545	-0.722717
Q8CJF7;F6S6E4;F6SJR1	Protein ELYS	Ahctf1		247.64	+	2.05106	0.0206726	0.415789
Q8JZQ9;A0A0G2JG48	Eukaryotic translation initiation factor 3 subunit B	Eif3b		91.369	+	3.62769	0.0114722	0.69367
Q9D4G5;Q8K205		Pop1		114.03	+	2.65089	0.0118	1.27362
Q8K224;A2BH46;E9Q498	N-acetyltransferase 10	Nat10		115.42	+	2.58938	0.0120472	0.815819
Q8K2V6	Importin-11	Ipo11		112.41	+	1.39062	0.017511	1.23462
Q8K363;F6ZX28	ATP-dependent RNA helicase DDX18	Ddx18		74.18	+	2.73966	0.0111043	0.678338
Q8K4L0	ATP-dependent RNA helicase DDX54	Ddx54		97.747	+	2.1566	0.0121032	0.68679
Q8K4R9;A0A0R4J0G7;J3QPN1;E9QQ48	Disks large-associated protein 5	Dlgap5		90.195	+	2.47489	0.0114691	1.30154
Q8QZY1	Eukaryotic translation initiation factor 3 subunit L	Eif3l		66.612	+	3.21408	0.0117987	0.796717
Q8R1B4;M0QWV3	Eukaryotic translation initiation factor 3 subunit C	Eif3c		105.53	+	2.77432	0.0106413	0.875814
Q8VC65;G3UZN7	Nurim	Nrm		29.435	+	2.06625	0.0110692	-1.06381
Q8VEK3;G3XA10	Heterogeneous nuclear ribonucleoprotein U	Hnrnpu;Gm28062	+	87.917	+	3.13397	0.0111886	0.745127
Q8VHM5;F7B5B5;A2AW41;S4R1E9;A2AW40;V9GWW3		Hnrnpr	+	70.887	+	1.34611	0.0300927	-0.603645
Q91V55;P97461;D3YYM6;D3Z1S8	40S ribosomal protein S5;40S ribosomal protein S5, N-terminally processed	Rps5	+	22.876	+	1.49898	0.0261325	0.533459
Q91V89;Q60996;Q3UZJ4;Q6PD28;Q61151	Serine/threonine-protein phosphatase 2A 56 kDa regulatory subunit gamma isoform	Ppp2r5d;Ppp2r5c		68.994	+	1.23904	0.0348707	0.680611
Q91VE6;E0CXU3	MKI67 FHA domain-interacting nucleolar phosphoprotein	Nifk		36.265	+	1.66866	0.0240947	0.471319
Q91VZ6;D3YVX4	Stromal membrane-associated protein 1	Smap1		47.66	+	2.16439	0.0116855	2.55007
Q91WM1;A2BH82	Spermatid perinuclear RNA-binding protein	Strbp		73.704	+	1.28856	0.0148074	3.19621
Q91WN1	DnaJ homolog subfamily C member 9	Dnajc9		30.059	+	3.30042	0.0118241	0.557585
Q91YU8;A0A1L1SRW3	Suppressor of SWI4 1 homolog	Ppan		52.755	+	3.38658	0.0131376	0.934985
Q920E5;A0A0G2JEA5;A0A0G2JDJ5;A0A0G2JEB3;A0A0G2JE82	Farnesyl pyrophosphate synthase	Fdps		40.581	+	2.03991	0.0111155	1.17789
Q921K2;P11103;A0A0A6YX03;A0A0A6YY63;A0A0A6YVX0	Poly [ADP-ribose] polymerase 1	Parp1		112.72	+	2.64222	0.0133739	-1.66436
Q922B2;Q8BJY7	Aspartate--tRNA ligase, cytoplasmic	Dars		57.147	+	3.07953	0.0118791	0.60611
Q99JY0;D3YXU1	Trifunctional enzyme subunit beta, mitochondrial;3-ketoacyl-CoA thiolase	Hadhb		51.386	+	2.08742	0.0109614	-1.25607
Q99KP6	Pre-mRNA-processing factor 19	Prpf19		55.238	+	2.43623	0.0128023	0.47593
Q99P88	Nuclear pore complex protein Nup155	Nup155		155.12	+	2.55803	0.0108681	0.749881
Q9CPP0	Nucleoplasmin-3	Npm3		19.023	+	1.42693	0.0193558	0.971268
Q9CQ43;Q8VCG1		Dut		17.384	+	1.6694	0.0129857	0.999136
Q9CQR2	40S ribosomal protein S21	Rps21	+	9.1413	+	1.70891	0.012875	0.92111
Q9CR47	Ribosome biogenesis protein NSA2 homolog	Nsa2		30.036	+	4.05774	0.007375	1.97058
Q9CR57;A0A1L1SUF6	60S ribosomal protein L14	Rpl14	+	23.564	+	1.77817	0.0239495	0.446325
Q9CU62;S4R179	Structural maintenance of chromosomes protein 1A	Smc1a		143.23	+	1.88071	0.0126192	0.835964
Q9CW03	Structural maintenance of chromosomes protein 3	Smc3		141.55	+	1.96863	0.0223476	0.407986
Q9CWF2;CON__ENSEMBL:ENSBTAP00000025008;A2AQ07;G3UZR1	Tubulin beta-2B chain	Tubb2b	+	49.953	+	3.64149	0.0107188	-1.33949
Q9CXK8;E9Q109	60S ribosome subunit biogenesis protein NIP7 homolog	Nip7		20.451	+	1.00958	0.0327217	1.90046
Q9CXS4;F6SS03	Centromere protein V	Cenpv		27.541	+	2.31308	0.0116338	-2.20964
Q9CZ13;A0A0A6YWX6;A0A0A6YW82	Cytochrome b-c1 complex subunit 1, mitochondrial	Uqcrc1		52.851	+	1.67467	0.0203864	0.575348
Q9D051	Pyruvate dehydrogenase E1 component subunit beta, mitochondrial	Pdhb		38.937	+	1.50258	0.0128176	-2.5151
Q9D287;D6RGA5;D6RHR7	Pre-mRNA-splicing factor SPF27	Bcas2		26.131	+	1.4443	0.019283	0.900327
Q9D4J7;E9QAG2	PHD finger protein 6	Phf6		41.139	+	1.29568	0.028856	0.67788
Q9D666;F7BX07;Q3TSM1;F6XYA0;D3Z5Q2;D3Z3N5;D3YUW9;D3Z1X3	SUN domain-containing protein 1	Sun1		101.98	+	3.28791	0.00762712	-1.87278
Q9D880	Mitochondrial import inner membrane translocase subunit TIM50	Timm50		39.776	+	1.5804	0.0223957	0.570478
Q9D937;A0A087WRC2;A0A087WQJ5	Uncharacterized protein C11orf98 homolog			14.098	+	2.58412	0.0121485	0.85037
Q9DCH4	Eukaryotic translation initiation factor 3 subunit F	Eif3f		37.984	+	1.71367	0.012697	1.04888
Q9DCL9;D3Z6P1;D6RCU8	Multifunctional protein ADE2;Phosphoribosylaminoimidazole-succinocarboxamide synthase;Phosphoribosylaminoimidazole carboxylase	Paics		47.006	+	1.56634	0.0164282	0.873122
Q9EPQ8	Transcription factor 20	Tcf20		215.68	+	4.14778	0.00842857	-1.92277
Q9ERD7;A0A1D5RM76	Tubulin beta-3 chain	Tubb3	+	50.418	+	3.41272	0.00786667	-4.91798
Q9ES00;G3UZD6;H7BXC2	Ubiquitin conjugation factor E4 B	Ube4b		133.32	+	3.03693	0.0129009	1.14595
Q9JJ89	Coiled-coil domain-containing protein 86	Ccdc86		46.486	+	2.59564	0.0119225	1.56729
Q9JKB3	Y-box-binding protein 3	Ybx3		38.813	+	2.43532	0.0120887	-0.969159
Q9QZD9;A2AE03	Eukaryotic translation initiation factor 3 subunit I	Eif3i		36.46	+	2.14703	0.011758	0.83169
Q9R0P5	Destrin	Dstn		18.521	+	2.26254	0.0124332	0.553797
Q9WU78	Programmed cell death 6-interacting protein	Pdcd6ip		96.023	+	2.65925	0.012304	1.48842
Q9WUK4	Replication factor C subunit 2	Rfc2		38.724	+	1.06835	0.0432691	0.874458
Q9WV02;A2AFI3;S4R1F6;A2AFI4	RNA-binding motif protein, X chromosome;RNA-binding motif protein, X chromosome, N-terminally processed	Rbmx		42.3	+	2.39878	0.0128	-3.60186
Q9WVM1;E9Q851;F6WD40;E9Q9N9	Rac GTPase-activating protein 1	Racgap1		70.158	+	2.25404	0.0113293	-1.85489
Q9Z110;D3Z0B4;H3BKJ8;H3BLE8;H3BKK0	Delta-1-pyrroline-5-carboxylate synthase;Glutamate 5-kinase;Gamma-glutamyl phosphate reductase	Aldh18a1		87.265	+	1.55134	0.0214071	-0.618285
A0A0A0MQA5;P68368;A0A087WQS4;A0A087WRB4;A0A087WSB0;A0A087WSL5	Tubulin alpha-4A chain	Tuba4a	+	52.793	+	1.75447	0.0138017	-0.809595
A0A0J9YU83;F7BJB9		Morc3		98.509	+	1.29784	0.0192632	1.46841
A0A0J9YUZ4;P63158;A0A0J9YUD8;D3YZ18;D3YVC6	High mobility group protein B1	Hmgb1		24.233	+	1.41981	0.0137637	-1.8621
A0A0N5E9G7;G3X8Z6;Q5U4B1;G3UWX1;P35601;A0A0N4SVN6	Replication factor C subunit 1	Rfc1		125.86	+	1.80506	0.0215501	0.479413
F6SH61;Z4YMB8;A0A0R4J196;F8WH31;E9PUD1;Q58A65	C-Jun-amino-terminal kinase-interacting protein 4	Spag9		84.935	+	2.18547	0.0110086	-1.09458
A0A171KXD3;Q9JIF0;A0A140LHF7;A0A140LJF4;A0A140LJ70;A0A140LJ68;A0A140LHS4;A0A140LIF7;A0A140LI33;Q6PAK3	Protein arginine N-methyltransferase 1	Prmt1		36.567	+	2.64821	0.0111568	0.940247
A2ATU9;Q8BY71	Histone acetyltransferase type B catalytic subunit	Hat1		50.182	+	1.99789	0.0120584	1.03207
A2BE28	Ribosomal biogenesis protein LAS1L	Las1l		89.413	+	2.23763	0.012586	0.628974
E9PUG8;Q8CCG4	Developmental pluripotency-associated protein 4	Dppa4		26.648	+	1.63536	0.0127074	-1.5789
E9PV84;E9PXB1;Q3URR7	Zinc finger and SCAN domain-containing protein 10	Zscan10		61.588	+	1.8399	0.0207658	-0.481859
G3UXT7;Q8CFQ9;P56959;G3UZD2;Q91VQ2;F6QCI0	RNA-binding protein FUS	Fus		13.897	+	2.34893	0.0111928	-1.51759
G5E870;A0A087WNZ7;A0A0B4J1N9;A0A087WRV6;A0A087WQ02;A0A087WP92;Q3TP48;A0A087WSG4;A0A087WS65;A0A087WS33	E3 ubiquitin-protein ligase TRIP12	Trip12		224.13	+	1.79316	0.029559	0.382543
L7N208;F7AIG4;L7N212;Q8BZW4		Gm10324		70.027	+	1.32427	0.0198979	-1.15569
O35286;Q497W9;A0A0G2JG10;A0A0G2JGQ5	Pre-mRNA-splicing factor ATP-dependent RNA helicase DHX15	Dhx15		91.006	+	1.68647	0.0235485	0.486598
P14733	Lamin-B1	Lmnb1		66.785	+	1.39196	0.0242443	-0.675573
P15105;D3YVK1;D3Z121	Glutamine synthetase	Glul		42.119	+	1.77358	0.0113415	-2.43761
P27773;F6Q404	Protein disulfide-isomerase A3	Pdia3		56.678	+	1.22214	0.0229103	-1.19939
P43274	Histone H1.4	Hist1h1e		21.977	+	1.58533	0.0241583	0.520329
Q5RKN9;P47753;A0A0G2JE27	F-actin-capping protein subunit alpha-1	Capza1		32.953	+	1.24271	0.032659	-0.713685
P52927	High mobility group protein HMGI-C	Hmga2		11.819	+	1.91817	0.0116091	-1.97894
P54276	DNA mismatch repair protein Msh6	Msh6		151.08	+	1.53584	0.0208597	0.679789
P57784;A0A0U1RNZ6;G5E883	U2 small nuclear ribonucleoprotein A	Snrpa1		28.357	+	1.4166	0.0267211	0.589141
P61327;A0A023T778;Q9CQL1;G3UZW7	Protein mago nashi homolog;Protein mago nashi homolog 2	Magoh;Magohb		17.163	+	1.93678	0.0119735	-0.898617
P62267	40S ribosomal protein S23	Rps23	+	15.807	+	2.13149	0.0405725	0.291618
P62281;A0A1B0GRR3;A0A1B0GSE8	40S ribosomal protein S11	Rps11	+	18.431	+	1.53433	0.026917	0.495726
P62717;A0A1D5RLW5;A0A1D5RM85;A0A1D5RME4;A0A1D5RM79;F6YJW4;A0A1D5RMC7	60S ribosomal protein L18a	Rpl18a	+	20.732	+	2.5854	0.0125075	0.46936
P83917;Q7TPM0;Q9CYJ8	Chromobox protein homolog 1	Cbx1		21.418	+	1.47295	0.0125449	2.10554
P97310;A0A0N4SVY2	DNA replication licensing factor MCM2	Mcm2		102.08	+	1.32599	0.0456709	0.481227
Q05CL8;A2AMD0	La-related protein 7	Larp7		64.802	+	3.19493	0.00803571	2.57996
Q3TZX8;A0A0U1RPV7	Polynucleotide 5-hydroxyl-kinase NOL9	Nol9		80.839	+	1.5961	0.0147763	0.893024
Q5RJG1	Nucleolar protein 10	Nol10		80.076	+	1.48161	0.0190806	0.84255
Q6P9P6	Kinesin-like protein KIF11	Kif11		118.03	+	1.88626	0.04169	0.319459
Q6P9R1	ATP-dependent RNA helicase DDX51	Ddx51		70.367	+	2.23336	0.0113025	0.995935
Q6PB66;F6V2A3	Leucine-rich PPR motif-containing protein, mitochondrial	Lrpprc		156.61	+	2.05435	0.0375159	0.308229
Q6PR54	Telomere-associated protein RIF1	Rif1		266.23	+	1.99354	0.0126978	-0.757171
Q80ZM5		H1fx		20.151	+	1.91976	0.0222998	-0.420212
Q8BGQ7	Alanine--tRNA ligase, cytoplasmic	Aars		106.91	+	1.73588	0.0412519	-0.35062
Q8BWY3	Eukaryotic peptide chain release factor subunit 1	Etf1		49.03	+	2.02405	0.0118557	0.80253
Q8CFI7	DNA-directed RNA polymerase II subunit RPB2	Polr2b		133.91	+	2.22065	0.012237	0.806576
Q8R323	Replication factor C subunit 3	Rfc3		40.526	+	1.61577	0.0178596	0.726421
Q8VHZ7;F6VY64	U3 small nucleolar ribonucleoprotein protein IMP4	Imp4		33.656	+	1.9268	0.0113511	1.87894
Q8VI75;Q5U4C5;D6RES6	Importin-4	Ipo4		119.27	+	1.99811	0.011155	1.19091
Q91Z31;A0A0G2JGW0;Q3V328;A0A0G2JFV8	Polypyrimidine tract-binding protein 2	Ptbp2		57.488	+	2.33549	0.0107582	-1.40775
Q99JR1	Sideroflexin-1	Sfxn1		35.649	+	1.86155	0.0147008	0.61565
Q99LD9;D3Z487;D3Z7J6	Translation initiation factor eIF-2B subunit beta	Eif2b2		38.897	+	1.77995	0.0232754	0.453709
Q99MR6;A0A0G2JDF8;A0A0G2JG65;A0A0G2JDF1;A0A0G2JDN3	Serrate RNA effector molecule homolog	Srrt		100.45	+	1.2781	0.0431376	0.539835
Q9D1R9;A0A0G2JEY6;A0A0G2JGY8;D3YWC0	60S ribosomal protein L34	Rpl34		13.293	+	2.71508	0.011817	0.497983
Q9QZQ8	Core histone macro-H2A.1	H2afy	+	39.735	+	1.4632	0.0302389	-0.509085
Q9R0X4;Q32MW3	Acyl-coenzyme A thioesterase 9, mitochondrial;Acyl-coenzyme A thioesterase 10, mitochondrial	Acot9;Acot10		50.56	+	1.22603	0.0199907	-1.78531
Q9WTX6;Q3TPM3	Cullin-1	Cul1		89.69	+	1.57793	0.0213188	0.58812
Q9WU62	Inner centromere protein	Incenp		101.21	+	1.64633	0.0127662	1.02868
A0A0R4J0W6;Q9CRC8;F6RDA7;D6RHB1;D6RFC5;A0A0G2JGC9;F6RGS7	Leucine-rich repeat-containing protein 40	Lrrc40		68.048	+	2.25092	0.0121875	1.34438
A0A0R4J254;Q9ESJ0	Exportin-4	Xpo4		129.96	+	1.45417	0.0137898	1.47955
E9Q5Q0;Q3TGG2;A0A0U1RPL0;Q7TQH0;J3QP59	Ataxin-2-like protein	Atxn2l		92.071	+	1.54143	0.0384739	-0.419112
A2AFQ9;E9PUU4;Q8BX17	Gem-associated protein 5	Gemin5		166.52	+	1.43186	0.0175539	1.09523
A2AMV1;Q9D0I8;D6RCI7	mRNA turnover protein 4 homolog	Mrto4		27.417	+	1.37551	0.0269703	0.613988
A2AQR0;Q64521	Glycerol-3-phosphate dehydrogenase;Glycerol-3-phosphate dehydrogenase, mitochondrial	Gpd2		82.829	+	1.80714	0.0115566	-3.07302
A2ATQ5;P53995;Q6PG65	Anaphase-promoting complex subunit 1	Anapc1		134.72	+	1.74847	0.0192172	0.582795
A6ZI44;P05064;D3YWI1;A0A0U1RPN8;D3YV98;A0A0U1RPT5;D3Z510;A6ZI47;Q9CPQ9;A6ZI46;P05063;Q91Y97	Fructose-bisphosphate aldolase;Fructose-bisphosphate aldolase A	Aldoa;Aldoart2;Aldoart1		45.12	+	3.10028	0.0121687	-1.45825
F6WYM0;D3YYB1;D3Z3C0;E9Q3V6;P42208;F6UKN5;D3Z1S1	Septin-2	2018-09-02		24.258	+	4.81295	0	-4.47511
D3Z061;Q8C7R4	Ubiquitin-like modifier-activating enzyme 6	Uba6		114.77	+	1.77213	0.0121919	1.67897
E9Q1T9;Q9ERK4;F6ZEW4;E9QAX7	Exportin-2	Cse1l		103.89	+	1.70003	0.0238992	0.476001
E9Q616		Ahnak		604.25	+	3.60433	0.0107273	-4.59001
E9Q784		Zc3h13		203.75	+	1.11664	0.0455884	-0.715472
H3BJQ3;H3BKE5;E9QMH1;H3BJ44;H3BJL0;Q99J72;Q3TI69;H3BKS1;H3BJJ6;H3BJD1;H3BL97	DNA dC->dU-editing enzyme APOBEC-3	Apobec3		46.97	+	0.938182	0.0449493	-1.68248
E9QN31;Q922K7;A0A0N4SW16	Probable 28S rRNA (cytosine-C(5))-methyltransferase	Nop2		86.906	+	2.01582	0.0198673	0.438526
F6S4B9;Q5SVQ0;Q9D1P2;Q8BRB7	Histone acetyltransferase;Histone acetyltransferase KAT7;Histone acetyltransferase KAT8;Histone acetyltransferase KAT6B	Kat7;Kat8;Kat6b		17.471	+	1.32305	0.0426103	0.509048
Q6ZWZ6;F7AEH4;A0A1W2P7A1;P63323	40S ribosomal protein S12	Rps12	+	14.515	+	2.45968	0.0125415	0.514831
F8WHU5;Q4VA53	Sister chromatid cohesion protein PDS5 homolog B	Pds5b		164.76	+	1.49682	0.0260802	0.534494
F8WIX8;Q64523;Q6GSS7	Histone H2A;Histone H2A type 2-C;Histone H2A type 2-A	Hist1h2al;Hist2h2ac;Hist2h2aa1	+	13.607	+	1.468	0.0215022	-0.709592
Q68EM3;G3UY65;P24860	G2/mitotic-specific cyclin-B1	Ccnb1		41.467	+	3.59681	0.00945946	-2.3171
G8JL51;Q8K202	DNA-directed RNA polymerase I subunit RPA49	Polr1e		45.828	+	0.991613	0.0355795	1.7973
H7BX01;P58281;F6U775;E0CXD1	Dynamin-like 120 kDa protein, mitochondrial;Dynamin-like 120 kDa protein, form S1	Opa1		113.23	+	2.97902	0.00775862	-3.43118
O55091	Protein IMPACT	Impact		36.276	+	1.69424	0.0197604	-0.575885
O89079;D3Z315;E9Q6I5;F6YFR7	Coatomer subunit epsilon	Cope		34.567	+	1.65596	0.0168429	0.729388
Q3THW5;P0C0S6;Q8R029;Q3UA95	Histone H2A.V;Histone H2A.Z;Histone H2A	H2afv;H2afz	+	13.509	+	1.09706	0.0417671	0.843905
P10126;D3YZ68;D3Z3I8	Elongation factor 1-alpha 1	Eef1a1	+	50.113	+	2.14282	0.0285312	0.322414
P14131	40S ribosomal protein S16	Rps16	+	16.445	+	1.75992	0.0192376	0.562726
P14685;F7B7L8	26S proteasome non-ATPase regulatory subunit 3	Psmd3		60.718	+	1.69646	0.0432445	0.349258
P17426;A0A140LIG7;A0A0J9YUA7	AP-2 complex subunit alpha-1	Ap2a1		107.66	+	1.55432	0.0178164	0.801737
P18760;F8WGL3	Cofilin-1	Cfl1		18.559	+	2.80315	0.0200374	0.324552
P26350;A0A087WP98;A0A087WPN6;A0A087WQN2	Prothymosin alpha;Prothymosin alpha, N-terminally processed;Thymosin alpha	Ptma		12.254	+	0.942838	0.0404972	-2.13551
P38647	Stress-70 protein, mitochondrial	Hspa9	+	73.46	+	2.41035	0.017317	-0.401401
P51410;A0A0G2JES3;A0A140T8T4;D3Z629;D3YZT0;A0A0G2JFQ3;S4R1R7	60S ribosomal protein L9	Rpl9	+	21.881	+	1.80454	0.0128385	0.795387
P60867	40S ribosomal protein S20	Rps20	+	13.373	+	2.72766	0.0125846	0.810673
P62082;F6SVV1	40S ribosomal protein S7	Rps7;Gm9493	+	22.127	+	2.2257	0.0214123	0.36665
P62242	40S ribosomal protein S8	Rps8	+	24.205	+	1.52291	0.0374457	0.432301
P62264;D3YVF4;D3Z7I1	40S ribosomal protein S14	Rps14	+	16.273	+	2.06972	0.0257561	0.352057
P62274;D3YYL7	40S ribosomal protein S29	Rps29	+	6.6767	+	1.84957	0.0123964	0.805506
P62317;D3Z5N9	Small nuclear ribonucleoprotein Sm D2	Snrpd2;Gm5449		13.527	+	1.02111	0.0339313	-1.60611
P62892	60S ribosomal protein L39	Rpl39	+	6.4066	+	1.08058	0.026028	1.62826
P62900;A0A0A6YX26;A0A0A6YXL3	60S ribosomal protein L31	Rpl31	+	14.463	+	1.46203	0.0241443	0.598214
P63168;Q9D0M5;Q80ZS7	Dynein light chain 1, cytoplasmic;Dynein light chain 2, cytoplasmic	Dynll1;Dynll2		10.366	+	1.64656	0.0338667	0.408066
Q3UNN4;P97496;Q3UZD0	SWI/SNF complex subunit SMARCC1	Smarcc1		122.78	+	2.02449	0.0225411	0.397785
Q3TFD0;Q9CZN7	Serine hydroxymethyltransferase	Shmt2		55.42	+	1.08478	0.0272465	-1.41434
Q3THS6;A0A0U1RNT6;A0A0U1RNK6;A0A0U1RQ95;A0A0U1RQB0;Q91X83;A0A0U1RPH4	S-adenosylmethionine synthase isoform type-2	Mat2a		43.688	+	2.82998	0.0111618	0.624787
Q3TMP1		Gtf3c3		100.62	+	1.81389	0.0115356	1.66522
Q3U0V1	Far upstream element-binding protein 2	Khsrp		76.775	+	1.38642	0.0494414	0.434219
Q3U741;Q501J6	Probable ATP-dependent RNA helicase DDX17	Ddx17		72.584	+	1.44406	0.0294225	-0.528755
Q3UI84;Q99J62;D3Z7I8;D6RGM1	Replication factor C subunit 4	Rfc4		40.918	+	1.69857	0.0140214	0.822112
Q3ULL6;F6Q8N5		Upf3b		57.065	+	4.05155	0.0168571	-3.25777
Q60932;F2Z471	Voltage-dependent anion-selective channel protein 1	Vdac1		32.351	+	1.82664	0.0205804	0.479314
Q61846	Maternal embryonic leucine zipper kinase	Melk		72.728	+	2.20783	0.0146527	0.481721
Q64433	10 kDa heat shock protein, mitochondrial	Hspe1		10.963	+	1.59376	0.0114722	-3.07421
Q76MZ3;G3UWL2;H3BLQ0;Q3TTF6;H3BKU1;G3UWS4;Q7TNP2;G3UXQ1;H3BJ83;H3BIV7;H3BLE7	Serine/threonine-protein phosphatase 2A 65 kDa regulatory subunit A alpha isoform	Ppp2r1a		65.322	+	1.60291	0.0224924	0.557666
Q8BG32;G3UYI4;G3UYL3;G3UXL5;G3UYH2;G3UZ28;G3UYL8;G3UX15;G3UZ33;G3UWW7	26S proteasome non-ATPase regulatory subunit 11	Psmd11		47.436	+	0.943235	0.0375865	-2.66232
Q8BJ71;A0A1D5RLQ0	Nuclear pore complex protein Nup93	Nup93		93.28	+	1.61104	0.0239959	0.497709
Q8C156	Condensin complex subunit 2	Ncaph		82.302	+	1.80168	0.0138645	0.730525
Q8CG48;B1AWH6	Structural maintenance of chromosomes protein 2	Smc2		134.24	+	1.74189	0.0241942	0.445864
Q99JT9	1,2-dihydroxy-3-keto-5-methylthiopentene dioxygenase	Adi1		21.523	+	0.958424	0.0380598	2.11051
Q99JX7;V9GXF3;V9GXW3	Nuclear RNA export factor 1	Nxf1		70.299	+	2.10524	0.0121438	-3.55993
Q9CQ60;F6X8L5;Q8CBG6;D3Z4X1	6-phosphogluconolactonase	Pgls		27.254	+	1.10122	0.0232367	2.28976
Q9CY27;G3UWE1;Q52L67;Q3TAN8;A0A1D5RLB4;A0A1D5RLH3	Very-long-chain enoyl-CoA reductase	Tecr		36.09	+	1.46348	0.0350398	0.474911
Q9CZJ1	Probable U3 small nucleolar RNA-associated protein 11	Utp11l		30.55	+	3.11471	0.00918367	3.77177
Q9D6Z1;E0CXZ0;F7CHQ7;A2APD7;F7CHP9;F6USW7;F6U250;F6V095	Nucleolar protein 56	Nop56		64.464	+	2.06693	0.0191714	0.449272
Q9D7N3;A0A0J9YU02	28S ribosomal protein S9, mitochondrial	Mrps9	+	44.929	+	1.13344	0.0241081	1.48819
Q9D903;A2ACZ1	Probable rRNA-processing protein EBP2	Ebna1bp2		34.702	+	2.97175	0.0115122	0.494732
Q9DBG3;H3BKM0;H3BIY9	AP-2 complex subunit beta;AP complex subunit beta	Ap2b1		104.58	+	2.9082	0.0120294	0.691102
Q9DC48	Pre-mRNA-processing factor 17	Cdc40		65.46	+	2.97122	0.0136486	-1.93872
Q9JKF1;A0A0U1RNG5;A0A0U1RPI2;A0A0U1RPU3;Q3UQP1;F8VQ29	Ras GTPase-activating-like protein IQGAP1	Iqgap1		188.74	+	1.27682	0.0362981	0.612597
Q9QYB1	Chloride intracellular channel protein 4	Clic4		28.729	+	1.88933	0.0200046	0.476067
Q9QYI3;A2A5E1;F7BTP8	DnaJ homolog subfamily C member 7	Dnajc7		56.475	+	1.20894	0.0394041	0.66237
Q9R0E1;F6W3Q8	Procollagen-lysine,2-oxoglutarate 5-dioxygenase 3	Plod3		84.921	+	0.876661	0.0434029	-4.63797
Q9Z1M8	Protein Red	Ik		65.615	+	1.62571	0.023138	0.526398
Q9Z2I9	Succinyl-CoA ligase [ADP-forming] subunit beta, mitochondrial	Sucla2		50.113	+	1.99446	0.019806	0.449211

## Sheet: d16
						Strip2 D16 vs WT D0
T: Protein IDs	T: Protein names	T: Gene names	crapome	Mol. weight [kDa]	Strip2_D16_WT_D0	-log10 p-value Strip2_D16_WT_D0	q-value Strip2_D16_WT_D0	Difference Strip2_D16_WT_D0
Q3UHL6;A0A087WR50;P11276;A0A087WS56;A0A087WS99;Q4KL80;A0A087WQE0;A0A087WQW8	Fibronectin;Anastellin	Fn1		260.13	+	1.99429	0.0226316	1.39945
A0A0A0MQA5;P68368;A0A087WQS4;A0A087WRB4;A0A087WSB0;A0A087WSL5	Tubulin alpha-4A chain	Tuba4a	+	52.793	+	2.1221	0.0208478	-1.67333
A0A0U1RPD8;Q8K284;A0A0U1RP70;A0A0U1RNK8	General transcription factor 3C polypeptide 1	Gtf3c1		226.76	+	2.20404	0.0313951	0.624149
A2A6Q8;Q9CZ19;P09541	Myosin light chain 4	Myl4		21.045	+	2.29358	0.0176986	-1.70114
A2AJY2;O35206;A2AJY7;A2AJY5	Collagen alpha-1(XV) chain;Restin	Col15a1		138.29	+	3.07681	0.0200714	2.1283
A2ANY6;J3QMC5		Mdn1		630.33	+	1.75696	0.0402379	-0.616735
A2BE28	Ribosomal biogenesis protein LAS1L	Las1l		89.413	+	2.09354	0.0323765	-0.638161
A6H6E2	Multimerin-2	Mmrn2		105.21	+	1.93839	0.024	1.32092
B2M1R6;P61979;H3BLL4;H3BKD0;H3BK96;H3BKI8;H3BJS9;H3BLP7;Q8BT23;H3BJ43	Heterogeneous nuclear ribonucleoprotein K	Hnrnpk	+	48.562	+	2.61369	0.017	1.02272
D3YTQ3;F6VQH5;Q9Z130	Heterogeneous nuclear ribonucleoprotein D-like	Hnrnpdl	+	46.27	+	2.57984	0.0193636	2.32066
D3YWT1;D3Z3N4;D3Z6Y3		Hnrnph3	+	35.181	+	2.00682	0.0236154	1.57969
D3Z396;Q8BG33;Q99PJ0;Q6DFY2;G5E8G3;F6Z2M6;F6RQ26	Neurotrimin	Ntm;Opcml		34.954	+	1.55929	0.0278143	-3.43308
E9PUD2;Q8K1M6	Dynamin-1-like protein	Dnm1l		79.532	+	1.31268	0.0410599	-1.82449
E9PWG6		Ncapg		112.87	+	1.76406	0.0401905	-0.672155
E9PWQ3;J3QQ16;A0A087WS16;D3YWD1		Col6a3		353.93	+	3.00817	0.02248	2.8415
E9PZ16;B1B0C7;Q05793	Basement membrane-specific heparan sulfate proteoglycan core protein;Endorepellin;LG3 peptide	Hspg2		469.78	+	3.31361	0.026	3.87096
E9PZ88;F8WIE1;Q91W89;E9PYM7;F6TFL1;E0CYW2	Alpha-mannosidase;Alpha-mannosidase 2C1	Man2c1		104.68	+	4.2606	0.0373333	1.97221
E9Q3X0;Q9EQK5;D3Z2N7	Major vault protein	Mvp		96.856	+	1.37993	0.0373035	1.76302
E9Q5G3;A0A1L1SRP4	Kinesin-like protein KIF23	Kif23		108.77	+	3.75691	0.028	-2.95315
E9QB02;Q68FL6;F6W0G8	Methionine--tRNA ligase, cytoplasmic	Mars		102.37	+	2.53895	0.0280144	-0.592194
E9QPX1;P39061;A0A1W2P6N8	Collagen alpha-1(XVIII) chain;Endostatin	Col18a1		182.29	+	3.39604	0.0281	2.56538
F6QKD2;Q9CWX9;A0A0N4SVT1;A0A0N4SWC5;A0A0N4SVK2;D3YWF9	Probable ATP-dependent RNA helicase DDX47	Ddx47		39.913	+	2.0508	0.0178333	2.29281
G3UYN0;Q587J6;E9PZU6;E9PXD6	LINE-1 type transposase domain-containing protein 1	L1td1		95.434	+	1.3718	0.0406053	-1.26545
G3X956;Q920B9	FACT complex subunit SPT16	Supt16;Supt16h		119.84	+	2.09808	0.0249219	0.947272
G3X9B1		Heatr1		242.07	+	2.46667	0.0306076	-0.549216
O08528;E9Q5B5;E9Q9M6;G3UVV4;P17710;Q91W97;D3YYR4;D3Z365	Hexokinase-2;Hexokinase	Hk2		102.53	+	4.04892	0.0241429	-1.67641
O08969;A0A140LIM7	Pleckstrin homology-like domain family A member 2	Phlda2		16.727	+	2.08067	0.0165641	-2.47902
Q8C2Q7;O35737	Heterogeneous nuclear ribonucleoprotein H;Heterogeneous nuclear ribonucleoprotein H, N-terminally processed	Hnrnph1	+	51.217	+	2.29544	0.0264651	0.747233
O54774	AP-3 complex subunit delta-1	Ap3d1		135.08	+	1.51642	0.0417078	0.918625
Q924B0;O55023;Q80ZJ2;D3Z703;A0A0A6YW07	Inositol monophosphatase 1	Impa1		30.429	+	2.12338	0.0323146	0.587446
O88207;A3KGE7;A0A1D5RMJ0;Q9JLI2	Collagen alpha-1(V) chain	Col5a1		183.67	+	2.11707	0.0213111	1.69801
O88322	Nidogen-2	Nid2		153.91	+	2.9564	0.0216154	2.78144
O88508;G3UXY2;G3UZK0;G3UZG8;G3UZH2;G3UY43;G3UX63;G3UZN5;G3UX07	DNA (cytosine-5)-methyltransferase 3A	Dnmt3a		101.67	+	3.70222	0.0330588	1.91278
O88569;A0A0N4SUM2	Heterogeneous nuclear ribonucleoproteins A2/B1	Hnrnpa2b1	+	37.402	+	1.85626	0.0304151	0.959488
P02463;A0A1B0GSI7;A0A1B0GRC0;F7CK55;Q63ZW6	Collagen alpha-1(IV) chain;Arresten	Col4a1		160.68	+	2.22344	0.0167792	1.74707
P02802;A0A1D5RLN7	Metallothionein-1	Mt1		6.0181	+	2.03675	0.0223273	1.3762
P08121;A0A087WPS3;A0A087WPJ5	Collagen alpha-1(III) chain	Col3a1		138.94	+	2.0451	0.0193737	1.73528
P08122	Collagen alpha-2(IV) chain;Canstatin	Col4a2		167.32	+	2.42433	0.0187843	2.71317
P08752;A0A0A6YWA9;B2RSH2;Q9DC51;A2AE32;P20612;P18872;Q3V3I2;P50149;A2A610;A2AE31;D3Z2M7;F6QPU5;Q66L47;Q8CGK7	Guanine nucleotide-binding protein G(i) subunit alpha-2	Gnai2		40.489	+	1.81342	0.0286027	-1.18932
P09103;E9Q8G8	Protein disulfide-isomerase	P4hb		57.058	+	1.65822	0.0286104	1.57075
P10922	Histone H1.0;Histone H1.0, N-terminally processed	H1f0		20.861	+	2.2654	0.02032	1.1377
P11087;CON__Q862S4	Collagen alpha-1(I) chain	Col1a1		138.03	+	2.3405	0.0172267	1.52239
P11679	Keratin, type II cytoskeletal 8	Krt8	+	54.565	+	1.75116	0.0253175	1.99755
P12382;A0A1W2P7T1;A0A1W2P6Q4	ATP-dependent 6-phosphofructokinase, liver type	Pfkl		85.359	+	1.96539	0.030225	-0.806902
P13864;J3QNW0	DNA (cytosine-5)-methyltransferase 1;DNA (cytosine-5)-methyltransferase	Dnmt1		183.19	+	3.01634	0.0182703	1.56175
P16460;J3QNG0	Argininosuccinate synthase	Ass1;Gm5424		46.584	+	2.96452	0.0176235	0.734474
P16858;A0A0A0MQF6;A0A1D5RLD8;S4R257;V9GXA7	Glyceraldehyde-3-phosphate dehydrogenase	Gapdh		35.81	+	2.65627	0.019	-1.26357
P18608;D3Z607	Non-histone chromosomal protein HMG-14	Hmgn1		10.152	+	1.94681	0.0185814	3.21236
P19096;A0A0U1RNJ1	Fatty acid synthase;[Acyl-carrier-protein] S-acetyltransferase;[Acyl-carrier-protein] S-malonyltransferase;3-oxoacyl-[acyl-carrier-protein] synthase;3-oxoacyl-[acyl-carrier-protein] reductase;3-hydroxyacyl-[acyl-carrier-protein] dehydratase;Enoyl-[acyl-carrier-protein] reductase;Oleoyl-[acyl-carrier-protein] hydrolase	Fasn		272.43	+	3.46349	0.0279084	0.438435
P19324;A0A140LHR4;A0A140LHK0;A0A140LHD6	Serpin H1	Serpinh1		46.533	+	2.48915	0.0276528	0.593822
P20029	78 kDa glucose-regulated protein	Hspa5	+	72.421	+	3.49066	0.0208261	0.920663
P21981;G3UXE8	Protein-glutamine gamma-glutamyltransferase 2	Tgm2		77.06	+	2.80389	0.0177674	1.66641
P25206	DNA replication licensing factor MCM3	Mcm3		91.545	+	3.05836	0.0206237	-0.671992
P43274	Histone H1.4	Hist1h1e		21.977	+	2.04575	0.0316429	0.679326
P52480;A0A1L1SU37;A0A1L1SQV8;A0A1L1SSN6;A0A1L1STV8;A0A1L1SUV0;A0A1L1ST52;A0A1L1SVH2;E9Q509;G3X925;P53657	Pyruvate kinase PKM	Pkm		57.844	+	1.78018	0.027697	-1.5411
P52624;E9Q391;Q5SUC6;F6YBT6;E9Q5K7;Q8R093;Q8CGR7	Uridine phosphorylase 1	Upp1		34.086	+	1.27708	0.039972	-2.63957
P52927	High mobility group protein HMGI-C	Hmga2		11.819	+	2.17024	0.0199216	1.26698
P54071;D6RIL6;A0A0U1RP68;A0A0U1RPR1;D3YVY3;A0A087WPT4;A0A087WRS9;O88844	Isocitrate dehydrogenase [NADP], mitochondrial	Idh2		50.906	+	2.43773	0.0222414	0.783523
P68033;P62737;P68134;P63268;D3YZY0;D3Z2K3;A0A1D5RM20;A0A0U1RQ96	Actin, alpha cardiac muscle 1;Actin, aortic smooth muscle;Actin, alpha skeletal muscle;Actin, gamma-enteric smooth muscle	Actc1;Acta2;Acta1;Actg2	+	42.019	+	1.38339	0.0473693	-1.0354
P70698;P70303	CTP synthase 1	Ctps1		66.682	+	2.08522	0.0268824	-0.888522
P80315;G5E839;G3UYW5;G3UXF3;G3UXG2	T-complex protein 1 subunit delta	Cct4		58.066	+	2.0587	0.0432069	-0.466188
Q3TWV4;P84091	AP-2 complex subunit mu	Ap2m1		49.389	+	2.32881	0.0376195	0.450562
P84104;A2A4X6	Serine/arginine-rich splicing factor 3	Srsf3;Gm12355		19.329	+	1.40331	0.0428571	1.10217
P97311;Q3ULG5	DNA replication licensing factor MCM6;DNA helicase	Mcm6		92.866	+	2.95162	0.0168434	-0.753478
Q01149;E0CXI2	Collagen alpha-2(I) chain	Col1a2		129.56	+	2.76141	0.0187778	2.41702
Q01320	DNA topoisomerase 2-alpha	Top2a		172.79	+	2.48699	0.027617	-0.603822
Q02788;D3Z7D5	Collagen alpha-2(VI) chain	Col6a2		110.33	+	2.40313	0.0181231	1.64946
Q04750;Q8R4U6	DNA topoisomerase 1	Top1		90.875	+	2.07723	0.0300373	0.714754
Q04857	Collagen alpha-1(VI) chain	Col6a1		108.49	+	3.14159	0.0208148	2.00286
Q07832;A0A0U1RQ54;A0A0U1RNM9	Serine/threonine-protein kinase PLK1	Plk1		68.3	+	1.88688	0.0308025	-0.92759
Q3KR45;P0DOY1		Dnmt3b		97.355	+	4.61273	0	-2.45268
Q3SYK4	Vertnin	Vrtn		83.134	+	2.85049	0.018129	-2.767
Z4YKB8;Q3TEA8;Z4YKA3;A2AM65;A2AM63;A2AM62;A2AM70;A2AM69	Heterochromatin protein 1-binding protein 3	Hp1bp3		60.85	+	2.39144	0.0175821	1.59458
Q3U2G2;Q61316	Heat shock 70 kDa protein 4	Hspa4	+	94.208	+	2.63461	0.0210769	-0.869635
Q3U4X8;P37913;V9GWZ4;E9PV36;D3YUW4	DNA ligase;DNA ligase 1	Lig1		104.09	+	1.80419	0.0354545	-0.745797
Q3U962	Collagen alpha-2(V) chain	Col5a2		145.02	+	1.88015	0.0251181	1.36912
Q4FZF3	Probable ATP-dependent RNA helicase DDX49	Ddx49		54.093	+	2.42717	0.0310898	-0.522362
Q5SF07;A6X8Z3	Insulin-like growth factor 2 mRNA-binding protein 2	Igf2bp2		65.583	+	3.06705	0.0210357	0.996141
Q5SQ20;Q9EQ61	Pescadillo homolog	Pes1		68.23	+	3.63401	0.0225333	-0.463733
Q5SS83;Q60634	Flotillin-2	Flot2		47.116	+	1.25549	0.0471736	-1.65428
Q5SX75;Q60716;B0QZH3;B0QZH1;Q5SX76;B0QZH2;F6ULE1	Prolyl 4-hydroxylase subunit alpha-2	P4ha2		61.014	+	3.63766	0.0295789	1.95606
Q60668;F6ZV59;E9Q5B6;F6SHF3;A0A0G2JFL4;F7A465	Heterogeneous nuclear ribonucleoprotein D0	Hnrnpd	+	38.354	+	1.85688	0.0371188	0.641631
Q60715	Prolyl 4-hydroxylase subunit alpha-1	P4ha1		60.909	+	2.20263	0.0170725	2.27859
Q60749;Q9WU01;A0A087WSL3;A0A087WR32;Q9R226	KH domain-containing, RNA-binding, signal transduction-associated protein 1	Khdrbs1		48.37	+	2.13921	0.0286667	0.740068
Q60848;D3Z414	Lymphocyte-specific helicase	Hells		95.125	+	2.15289	0.0223471	-0.978752
Q60865;F6YLI0;A2BH47;F6YP03	Caprin-1	Caprin1		78.168	+	1.67242	0.049432	-0.584334
Q61024;D3Z0C2;D3YYR0;D3Z028	Asparagine synthetase [glutamine-hydrolyzing]	Asns		64.282	+	2.77634	0.0193455	-1.29327
Q61245;E9PVT8;V9GWX8	Collagen alpha-1(XI) chain	Col11a1		181.03	+	3.51708	0.0281667	2.82838
Q61554	Fibrillin-1	Fbn1		312.3	+	3.20526	0.0255455	2.59805
Q61555	Fibrillin-2	Fbn2		313.82	+	2.77113	0.021125	2.78297
Q62009;CON__Q2KJC7;F7C9H0	Periostin	Postn		93.142	+	4.01459	0.0295	3.30346
Q62266	Cornifin-A	Sprr1a		15.765	+	2.5814	0.0196333	1.46009
Q62315;G3UZT8;G3UZW3	Protein Jumonji	Jarid2		137.44	+	1.47833	0.0476048	-0.796017
Q62351;Q8C872	Transferrin receptor protein 1	Tfrc		85.73	+	2.54109	0.0174595	-1.17053
Q640M1;Q6EJB6;E9Q9S3	U3 small nucleolar RNA-associated protein 14 homolog A	Utp14a		87.264	+	1.94405	0.0357835	-0.612881
Q6ZWY9;Q64478;Q64525;P10854	Histone H2B type 1-C/E/G;Histone H2B type 1-H;Histone H2B type 2-B;Histone H2B type 1-M	Hist1h2bc;Hist1h2bh;Hist2h2bb;Hist1h2bm	+	13.906	+	1.73144	0.0414585	0.622974
Q6J1H4;Q148W8	Undifferentiated embryonic cell transcription factor 1	Utf1		36.407	+	3.89473	0.0168286	-0.601196
Q6P9R1	ATP-dependent RNA helicase DDX51	Ddx51		70.367	+	2.45638	0.0464538	-0.372495
Q6PAC3	DDB1- and CUL4-associated factor 13	Dcaf13		51.456	+	2.53913	0.0229533	-0.788146
Q6PR54	Telomere-associated protein RIF1	Rif1		266.23	+	3.17534	0.0193143	-1.4276
Q6ZQL4	WD repeat-containing protein 43	Wdr43		75.38	+	1.28646	0.0404159	1.85607
Q80ZM5		H1fx		20.151	+	2.12381	0.0475667	0.427958
Q8BGJ5;Q922I7;Q8CB58;P17225;E9QMW9;E9Q279;F7DCW4;F7AXP1;E9PZ39;G3UY95;A0A1W2P7W3;B2RU80	Polypyrimidine tract-binding protein 1	Ptbp1		56.891	+	1.88295	0.0355474	0.666466
Q8BJS4;E0CY39	SUN domain-containing protein 2	Sun2		81.604	+	2.08311	0.0449872	0.450237
Q8BKC5;Q8BIV3	Importin-5	Ipo5		123.59	+	2.59834	0.0172593	-0.977217
Q8BMJ2	Leucine--tRNA ligase, cytoplasmic	Lars		134.19	+	2.02513	0.0373137	-0.547225
Q8BP40	Lysophosphatidic acid phosphatase type 6	Acp6		47.624	+	2.45307	0.0225321	0.829463
Q8BP47	Asparagine--tRNA ligase, cytoplasmic	Nars		64.279	+	4.45225	0.0312222	-1.24279
Q8BU30;E9Q866;F6Q6R1	Isoleucine--tRNA ligase, cytoplasmic	Iars		144.27	+	3.45344	0.0288	-0.416588
Q8BX22;A2AUZ7;A2AUZ6	Sal-like protein 4	Sall4		113.11	+	3.07237	0.0204848	-1.67248
Q8C6P8;G3UYC1;G3UY05;H3BL53;G3UYK1	Zinc finger protein 57	Zfp57		47.958	+	2.00549	0.0328686	-0.671795
Q8CI11	Guanine nucleotide-binding protein-like 3	Gnl3		60.786	+	2.25026	0.0348844	-0.485513
Q8K297	Procollagen galactosyltransferase 1	Colgalt1		71.06	+	1.95942	0.0170488	3.56838
Q8K411	Presequence protease, mitochondrial	Pitrm1		117.37	+	3.37191	0.020383	0.963696
Q8R2M2	Deoxynucleotidyltransferase terminal-interacting protein 2	Dnttip2		84.276	+	2.37734	0.0203103	-2.31852
Q8R326;F7D909	Paraspeckle component 1	Pspc1		58.758	+	3.19879	0.0234167	2.26611
Q8R3N1	Nucleolar protein 14	Nop14		98.768	+	2.50847	0.0231698	-0.810375
Q8VCG3;A0A1B0GS18;Q3UL50	WD repeat-containing protein 74	Wdr74		42.636	+	1.72466	0.0290541	1.43987
Q8VDF2;E9Q5Y5;Q7TMI3	E3 ubiquitin-protein ligase UHRF1	Uhrf1		88.303	+	2.77912	0.01916	-1.48175
Q8VIJ6;E9Q2M5	Splicing factor, proline- and glutamine-rich	Sfpq		75.441	+	2.13643	0.0224348	1.08627
Q91Z31;A0A0G2JGW0;Q3V328;A0A0G2JFV8	Polypyrimidine tract-binding protein 2	Ptbp2		57.488	+	1.98432	0.0197732	2.10737
Q99020;Q80XR6;Q20BD0	Heterogeneous nuclear ribonucleoprotein A/B	Hnrnpab	+	30.831	+	2.7482	0.0215506	0.804495
Q99JB2;A2AG39;F6WI02;A2AG41	Stomatin-like protein 2, mitochondrial	Stoml2		38.384	+	2.21639	0.0483852	-0.402381
Q99K41	EMILIN-1	Emilin1		107.58	+	2.01474	0.0227407	1.49017
Q99K48;B1AXT0	Non-POU domain-containing octamer-binding protein	Nono		54.54	+	1.94959	0.0273188	1.02406
Q99LE6;REV__Q9DAC9;REV__A0A0R4J273	ATP-binding cassette sub-family F member 2	Abcf2		71.781	+	3.67286	0.0198824	-1.07349
Q99LX0;A2A813;A2A815;A2A817;A2A816	Protein deglycase DJ-1	Park7		20.021	+	2.57483	0.0184062	1.36877
Q99ME9	Nucleolar GTP-binding protein 1	Gtpbp4		74.112	+	1.99352	0.0356	0.585628
Q9CPN8	Insulin-like growth factor 2 mRNA-binding protein 3	Igf2bp3		63.574	+	3.85741	0.0178485	0.620122
Q9CQN1	Heat shock protein 75 kDa, mitochondrial	Trap1		80.208	+	2.81061	0.02552	-0.57445
Q9CZD3	Glycine--tRNA ligase	Gars		81.877	+	1.71552	0.036936	-0.759215
Q9CZX8;D3YUT3;D3Z5R8;D3Z722;D3YUG3;S4R223	40S ribosomal protein S19	Rps19	+	16.085	+	1.55202	0.0384251	-0.972377
Q9D0R2;Q8BLY2	Threonine--tRNA ligase, cytoplasmic	Tars		83.355	+	2.80241	0.0163544	-0.862067
Q9D8M4	60S ribosomal protein L7-like 1	Rpl7l1	+	28.543	+	3.58617	0.0193793	-1.26287
Q9DBY8	Nuclear valosin-containing protein-like	Nvl		94.475	+	2.09968	0.0347459	-0.568188
Q9QZF2	Glypican-1;Secreted glypican-1	Gpc1		61.359	+	1.5414	0.0284768	-2.87604
Q9QZQ8	Core histone macro-H2A.1	H2afy	+	39.735	+	3.17684	0.0244348	2.67024
Q9R0E2;A8Y5E6;F6WNR1	Procollagen-lysine,2-oxoglutarate 5-dioxygenase 1	Plod1		83.594	+	5.0154	0	4.42509
Q9R0X4;Q32MW3	Acyl-coenzyme A thioesterase 9, mitochondrial;Acyl-coenzyme A thioesterase 10, mitochondrial	Acot9;Acot10		50.56	+	1.28266	0.0413303	-2.02464
Q9WVK4;Q9QXY6;Q8BH64	EH domain-containing protein 1	Ehd1		60.602	+	2.71638	0.0199661	-1.31226
Q9Z2Z9	Glutamine--fructose-6-phosphate aminotransferase [isomerizing] 2	Gfpt2		77.008	+	1.67282	0.0468285	-0.624559
S4R294;S4R2J9;A0A0A0MQ79;Q3TLH4;S4R2E2;S4R2L9;S4R209;S4R298	Protein PRRC2C	Prrc2c		298.11	+	2.07704	0.0238447	-1.38363
A0A0G2JG95;Q8BX10	Serine/threonine-protein phosphatase PGAM5, mitochondrial	Pgam5		20.294	+	1.83945	0.0386117	0.63936
E9Q7W0;A0A0J9YTV5;P31266;Q3U6F1;A0A0J9YVE0	Recombining binding protein suppressor of hairless	Rbpj		54.325	+	2.17541	0.0270815	0.805309
A0A0N4SUH4;Q8BKS9	Pumilio domain-containing protein KIAA0020	Kiaa0020		72.93	+	2.02522	0.0411441	-0.494099
A0A0R4J0H7;Q8K2Z4;A0A087WRK6;A0A087WNQ1	Condensin complex subunit 1	Ncapd2		155.59	+	2.26389	0.0229153	-0.904718
A0A0R4J1N9;P40630;D3Z0F3	Transcription factor A, mitochondrial	Tfam		23.384	+	1.99284	0.0280423	-0.92698
E9Q5Q0;Q3TGG2;A0A0U1RPL0;Q7TQH0;J3QP59	Ataxin-2-like protein	Atxn2l		92.071	+	2.04996	0.0406204	-0.507587
A0A140T8T5;P27546;E9PZ43;A0A0G2JFK3;A0A0G2JDY5;A0A0G2JG35;A0A0G2JDN7;A0A0G2JFH2;A0A0G2JFT4;A0A0G2JE57;A0A0G2JDU1	Microtubule-associated protein 4;Microtubule-associated protein	Map4		41.784	+	1.84592	0.0221261	2.16383
A0A1W2P7L7;P59708	Splicing factor 3B subunit 6	Sf3b6		13.037	+	3.04802	0.0267619	-4.11375
A3KGL9;F6W687;P09602;Q5XK38;B7ZCQ3;E9Q2Z4;J3QM43;A0A087WR34	Non-histone chromosomal protein HMG-17	Hmgn2		9.7258	+	1.39028	0.0328352	2.39373
B0V2N8;B0V2N7;P07356;B0V2N5	Annexin;Annexin A2	Anxa2		19.596	+	1.54668	0.0314667	1.78582
B1AQR8;G3X9T7;O08573	Galectin;Galectin-9	Lgals9		39.907	+	1.42312	0.0321871	2.93141
E9QAI5;B2RQC6;G3UWN2;E9QAT6;F6S3Z3	CAD protein;Glutamine-dependent carbamoyl-phosphate synthase;Aspartate carbamoyltransferase;Dihydroorotase	Cad		236.25	+	2.02679	0.0357354	-0.589825
D3Z3E8;E9PW39;D3YVL0;P23249	Putative helicase MOV-10	Mov10		113.6	+	2.85926	0.0204615	1.24105
D3Z0M9		Ddx23		95.493	+	1.92826	0.0330978	-0.665481
E9PV24	Fibrinogen alpha chain;Fibrinopeptide A;Fibrinogen alpha chain	Fga		87.428	+	2.78746	0.0187333	3.26956
E9PVC6;E9Q9E1;E9PVC5;Q6NZJ6;A0A0J9YUS5;E9Q770;D6RCH1;D3YWY7;D3YWC6;D3YWM1;D3Z439;A0A0J9YVC1;A0A0J9YUC1	Eukaryotic translation initiation factor 4 gamma 1	Eif4g1		171.28	+	2.07918	0.0303205	-0.737284
F8WHY8;E9PX23;Q8K4B0;Q3U3A7;E9Q794;Q3UII8;Q924K8;H3BLE1	Metastasis-associated protein MTA1;Metastasis-associated protein MTA3	Mta1;Mta3		79.189	+	3.33659	0.0284	-3.40918
E9Q1T9;Q9ERK4;F6ZEW4;E9QAX7	Exportin-2	Cse1l		103.89	+	2.28838	0.0477976	-0.387646
E9Q5C9		Nolc1		73.697	+	2.77316	0.0191	-1.77762
E9Q718;Q9R0B9	Procollagen-lysine,2-oxoglutarate 5-dioxygenase 2	Plod2		86.9	+	3.56767	0.0307273	2.67565
E9QAT0;Q6AXB7;P35922;D3Z6U8;E9QNF5;E9QAS8;E9QAS9	Fragile X mental retardation protein 1 homolog	Fmr1		66.169	+	1.40609	0.0496892	-0.883017
F2Z456;Q9DCN2;A0A0A0MQM3	NADH-cytochrome b5 reductase;NADH-cytochrome b5 reductase 3;NADH-cytochrome b5 reductase 3 membrane-bound form;NADH-cytochrome b5 reductase 3 soluble form	Cyb5r3		34.929	+	1.43871	0.0479919	-0.871888
F7A8H6;O70325;Q91XR9;S4R1E5	Phospholipid hydroperoxide glutathione peroxidase, mitochondrial;Phospholipid hydroperoxide glutathione peroxidase, nuclear;Glutathione peroxidase	Gpx4		29.146	+	1.39504	0.0325444	2.45211
F8VQJ3;P02468;F6SFQ3;F6TLW1	Laminin subunit gamma-1	Lamc1		177.19	+	1.41127	0.0327209	3.04617
F8WIB1;P61211;E9Q006	ADP-ribosylation factor-like protein 1	Arl1		15.65	+	1.42492	0.0324972	2.41724
G8JL74;G3UXA6;Q8BHD7;G3UZ01;F7C521;G3UXZ8	Polypyrimidine tract-binding protein 3	Ptbp3		59.465	+	2.28913	0.0217955	1.28109
Q68EM3;G3UY65;P24860	G2/mitotic-specific cyclin-B1	Ccnb1		41.467	+	1.96786	0.0201188	-2.02312
H3BKN0;Q1HFZ0	tRNA (cytosine(34)-C(5))-methyltransferase	Nsun2		81.373	+	1.65742	0.0352386	-0.870654
O54825	Bystin	Bysl		49.783	+	1.53643	0.0327263	-1.37373
O55029	Coatomer subunit beta	Copb2		102.45	+	2.65417	0.019551	1.79571
O70194	Eukaryotic translation initiation factor 3 subunit D	Eif3d		63.988	+	5.46961	0.0181905	-0.614338
O70310;F7APP3;A2AJH3;O70311	Glycylpeptide N-tetradecanoyltransferase 1;Glycylpeptide N-tetradecanoyltransferase;Glycylpeptide N-tetradecanoyltransferase 2	Nmt1;Nmt2		56.888	+	1.32747	0.0405956	1.53589
O89079;D3Z315;E9Q6I5;F6YFR7	Coatomer subunit epsilon	Cope		34.567	+	2.02814	0.0284082	0.84699
Q564E2;P06151;A0A1B0GSX0;A0A1B0GSR9;D3YZQ9;A0A1B0GT41;A0A1B0GQX5;A0A1B0GSL7;A0A1B0GRW9;A0A1B0GS79;A0A1B0GRC1;A0A1B0GRS2;D3YVR7;D3YZE4;P00342;A0A1B0GSR2;A0A1B0GRE9	L-lactate dehydrogenase;L-lactate dehydrogenase A chain	Ldha		36.498	+	3.25453	0.0177895	-1.24748
P10107	Annexin A1	Anxa1		38.734	+	1.61462	0.0288591	2.00932
P11440;D3Z2T9;E3W997;E9PVC7;A0A1L1SUS7;Q64261;Q3V3A1;Q04899;O35495;Q04735;Q8K0D0;Q14AX6;Q69ZA1	Cyclin-dependent kinase 1	Cdk1		34.106	+	2.30242	0.0257258	-0.80039
P14211	Calreticulin	Calr		47.994	+	1.39949	0.0330166	2.33192
P15864	Histone H1.2	Hist1h1c	+	21.266	+	1.93748	0.0408093	0.553562
P17809;G3V010	Solute carrier family 2, facilitated glucose transporter member 1	Slc2a1		53.984	+	1.83324	0.0354184	-0.685473
P23116	Eukaryotic translation initiation factor 3 subunit A	Eif3a		161.93	+	1.88919	0.0443761	-0.517188
P24369	Peptidyl-prolyl cis-trans isomerase B	Ppib		23.713	+	1.46921	0.0318528	2.73942
P43276	Histone H1.5	Hist1h1b		22.576	+	1.94889	0.0407768	0.519089
Q3TGU7;P50580	Proliferation-associated protein 2G4	Pa2g4		43.698	+	3.35982	0.026625	3.00539
P52293;A2A600;A2A601;A6PW68;F2Z431;A2A602	Importin subunit alpha-1	Kpna2		57.927	+	3.11785	0.0189333	-1.17651
P52479;G3X9U6;G3UYQ8	Ubiquitin carboxyl-terminal hydrolase 10	Usp10		87.021	+	1.5896	0.04	-0.866585
P53996;A0A0N4SVS6;Q9D548	Cellular nucleic acid-binding protein	Cnbp		19.592	+	1.53311	0.0409596	0.86216
P60229	Eukaryotic translation initiation factor 3 subunit E	Eif3e		52.22	+	2.28562	0.0266861	-0.726864
P61620;Q9CYJ6;Q9JLR1;A2ATT9;A0A0A6YVQ7	Protein transport protein Sec61 subunit alpha isoform 1	Sec61a1		52.264	+	1.66052	0.0490843	0.59261
P62245;F8WJ41;D3Z712;D3YVB4	40S ribosomal protein S15a	Rps15a	+	14.839	+	1.7119	0.0481878	-0.577869
P62264;D3YVF4;D3Z7I1	40S ribosomal protein S14	Rps14	+	16.273	+	2.62627	0.0415182	-0.372244
P62806	Histone H4	Hist1h4a		11.367	+	3.02511	0.01615	-0.746711
P63242;A0A0A0MQM0;J3QPS8;Q8BGY2	Eukaryotic translation initiation factor 5A-1;Eukaryotic translation initiation factor 5A;Eukaryotic translation initiation factor 5A-2	Eif5a;Eif5a2		16.832	+	1.92187	0.022046	-3.46956
P82198	Transforming growth factor-beta-induced protein ig-h3	Tgfbi		74.596	+	3.90181	0.0224	2.16454
P97379;A0A0J9YUY8;A0A0J9YTQ8	Ras GTPase-activating protein-binding protein 2	G3bp2		54.087	+	1.98517	0.0272836	-1.0209
P97930;D3Z3R3	Thymidylate kinase	Dtymk		23.914	+	1.33004	0.0440343	-1.36265
Q05D44;REV__D3YVK9;REV__F6W8R9;REV__Q6DFZ2;Q8CB96	Eukaryotic translation initiation factor 5B	Eif5b		137.61	+	1.68941	0.0284258	1.41291
Q06890;E9PUU2;E9PXG5;E9Q8Y5;E9Q9B8;E9Q2G2	Clusterin;Clusterin beta chain;Clusterin alpha chain	Clu		51.655	+	1.84082	0.0204043	4.51995
Q3TFD0;Q9CZN7	Serine hydroxymethyltransferase	Shmt2		55.42	+	4.02208	0.0248889	-1.98853
Q3THS6;A0A0U1RNT6;A0A0U1RNK6;A0A0U1RQ95;A0A0U1RQB0;Q91X83;A0A0U1RPH4	S-adenosylmethionine synthase isoform type-2	Mat2a		43.688	+	2.24863	0.0451814	-0.408243
Q3TVK3;Q9Z2W0;Q8BPW9;A0A087WS31;A0A087WSE6;A0A087WRC1;A0A087WSU0;A0A087WNX3;A0A087WSD3	Aspartyl aminopeptidase	Dnpep		52.466	+	3.70078	0.0173333	0.958714
Q3UER8;Q8VCM7	Fibrinogen gamma chain	Fgg		50.349	+	2.51028	0.0199583	2.47409
Q3UFM5	Nucleolar MIF4G domain-containing protein 1	Nom1		95.959	+	2.55087	0.0206667	-1.67561
Q3UHX9	Putative methyltransferase C9orf114 homolog	D2Wsu81e		42.957	+	1.31085	0.0391866	2.26144
Q5F2E7	Nuclear fragile X mental retardation-interacting protein 2	Nufip2		75.656	+	1.70019	0.035822	-0.84084
Q5SWN2;Q8VEE4	Replication protein A 70 kDa DNA-binding subunit;Replication protein A 70 kDa DNA-binding subunit, N-terminally processed	Rpa1		71.413	+	2.93856	0.0201895	-0.696903
Q61846	Maternal embryonic leucine zipper kinase	Melk		72.728	+	2.3827	0.0274887	-0.678083
Q62074;F6QWV4;D3YXY0;Q3V341;Q02956	Protein kinase C iota type	Prkci		68.203	+	1.87196	0.0401596	-0.595881
Q62165	Dystroglycan;Alpha-dystroglycan;Beta-dystroglycan	Dag1		96.904	+	1.48861	0.0326818	1.81027
Q6P542	ATP-binding cassette sub-family F member 1	Abcf1		94.944	+	2.36658	0.0193115	1.96726
Q6P5B0	RRP12-like protein	Rrp12		143.13	+	2.7118	0.0219286	-0.670641
Q6P5F9;F6YA11;A2AKT6	Exportin-1	Xpo1		123.09	+	2.14482	0.0312771	-0.630693
Q791V5;Q9D050	Mitochondrial carrier homolog 2	Mtch2		33.499	+	2.05359	0.0320473	0.662217
Q8BJW6;D3YZZ6;D6RFN2;D6RGA6	Eukaryotic translation initiation factor 2A;Eukaryotic translation initiation factor 2A, N-terminally processed	Eif2a		64.403	+	3.90692	0.0448	2.83374
Q8BK64	Activator of 90 kDa heat shock protein ATPase homolog 1	Ahsa1		38.117	+	2.34433	0.0241967	-0.782605
Q8BMK4	Cytoskeleton-associated protein 4	Ckap4		63.691	+	2.15721	0.0356354	0.522219
Q8BWT1	3-ketoacyl-CoA thiolase, mitochondrial	Acaa2		41.829	+	2.17811	0.0163611	2.28035
Q8CG76	Aflatoxin B1 aldehyde reductase member 2	Akr7a2		40.612	+	2.70099	0.0165915	1.0275
Q8CIE6;F8WHL2;F6XJN3	Coatomer subunit alpha;Xenin;Proxenin;Coatomer subunit alpha	Copa		138.43	+	2.50622	0.0231111	0.736767
Q8JZQ9;A0A0G2JG48	Eukaryotic translation initiation factor 3 subunit B	Eif3b		91.369	+	2.6972	0.0195714	-0.78086
Q8K2V6	Importin-11	Ipo11		112.41	+	1.36433	0.035266	-2.49358
Q8K4L0	ATP-dependent RNA helicase DDX54	Ddx54		97.747	+	2.16553	0.0228319	-1.07706
Q8K4R9;A0A0R4J0G7;J3QPN1;E9QQ48	Disks large-associated protein 5	Dlgap5		90.195	+	1.86422	0.0398113	-0.601144
Q8QZY1	Eukaryotic translation initiation factor 3 subunit L	Eif3l		66.612	+	2.81875	0.0287974	-0.478935
Q8R1B4;M0QWV3	Eukaryotic translation initiation factor 3 subunit C	Eif3c		105.53	+	2.13109	0.039375	-0.494517
Q8R1Q8	Cytoplasmic dynein 1 light intermediate chain 1	Dync1li1		56.614	+	2.67909	0.03699	0.39618
Q8VCR2	17-beta-hydroxysteroid dehydrogenase 13	Hsd17b13		33.458	+	2.30234	0.0197037	3.1857
Q8VDW0;D6RHT5	ATP-dependent RNA helicase DDX39A	Ddx39a		49.067	+	2.08301	0.0316585	-0.677694
Q8VHM5;F7B5B5;A2AW41;S4R1E9;A2AW40;V9GWW3		Hnrnpr	+	70.887	+	2.46653	0.0272154	0.650325
Q91VZ6;D3YVX4	Stromal membrane-associated protein 1	Smap1		47.66	+	1.97641	0.0199792	2.16285
Q91YR7	Pre-mRNA-processing factor 6	Prpf6		106.72	+	2.46235	0.0447966	-0.374658
Q921F4;V9GXB6	Heterogeneous nuclear ribonucleoprotein L-like	Hnrnpll	+	64.124	+	1.55051	0.0485844	0.719759
Q924C1	Exportin-5	Xpo5		136.97	+	1.79956	0.0289868	-1.13921
Q99JX7;V9GXF3;V9GXW3	Nuclear RNA export factor 1	Nxf1		70.299	+	3.66998	0.032	-3.49982
Q9CR86	Calcium-regulated heat stable protein 1	Carhsp1		16.062	+	2.43707	0.0200755	2.32048
Q9CSH3	Exosome complex exonuclease RRP44	Dis3		108.84	+	2.93579	0.0186984	-0.973914
Q9CXS4;F6SS03	Centromere protein V	Cenpv		27.541	+	2.33114	0.0173235	1.77586
Q9D051	Pyruvate dehydrogenase E1 component subunit beta, mitochondrial	Pdhb		38.937	+	1.76405	0.0227227	-2.54816
Q9D0I9	Arginine--tRNA ligase, cytoplasmic	Rars		75.673	+	1.89726	0.0359689	-0.64139
Q9D1C9;E9PYF0;E9QAX0	Ribosomal RNA-processing protein 7 homolog A	Rrp7a		32.399	+	2.52083	0.0430435	0.374331
Q9D666;F7BX07;Q3TSM1;F6XYA0;D3Z5Q2;D3Z3N5;D3YUW9;D3Z1X3	SUN domain-containing protein 1	Sun1		101.98	+	1.80086	0.0350323	-0.761531
Q9DB29	Isoamyl acetate-hydrolyzing esterase 1 homolog	Iah1		27.974	+	1.91061	0.0233905	2.02488
Q9ERD7;A0A1D5RM76	Tubulin beta-3 chain	Tubb3	+	50.418	+	1.95039	0.0350606	0.604199
Q9JJF3	Bifunctional lysine-specific demethylase and histidyl-hydroxylase NO66	No66		67.556	+	3.22511	0.0278462	-0.444566
Q9JKB3	Y-box-binding protein 3	Ybx3		38.813	+	1.89347	0.0323448	-0.768461
Q9JKX6;A0A0A6YVU1;A2ATT5	ADP-sugar pyrophosphatase	Nudt5		23.984	+	1.37733	0.0332787	-2.5543
Q9R0E1;F6W3Q8	Procollagen-lysine,2-oxoglutarate 5-dioxygenase 3	Plod3		84.921	+	4.94931	0	2.91026
Q9R1T2	SUMO-activating enzyme subunit 1;SUMO-activating enzyme subunit 1, N-terminally processed	Sae1		38.62	+	2.3773	0.0325318	-0.518196
Q9WVM1;E9Q851;F6WD40;E9Q9N9	Rac GTPase-activating protein 1	Racgap1		70.158	+	2.60911	0.0186341	-2.35497
Q9Z1N2	Origin recognition complex subunit 1	Orc1		95.102	+	1.31593	0.0408716	-1.74291
