# Supplementary material for: Epigenetic mechanisms of Strip2 in differentiation of pluripotent stem cells
Source: Cell Death Discov. 2022 Nov 5;8:447. doi: 10.1038/s41420-022-01237-5 (PMC9637104; doi:10.1038/s41420-022-01237-5)
Supplement: Supplementary file 11 — Table S2 [file 41420_2022_1237_MOESM11_ESM.xlsx]

## Sheet: HeatmapSelectedGOTop100
GO	Description	_LogP_D16	_LogP_D4	_LogP_ESCs
GO:0000054	ribosomal subunit export from nucleus	0	-3.25586	-4.02876
R-MMU-430116	GP1b-IX-V activation signalling	0	-3.95418	-4.74332
GO:0019827	stem cell population maintenance	0	-2.87115	-4.73435
GO:0097435	supramolecular fiber organization	0	-2.29252	-5.01871
R-MMU-109581	Apoptosis	0	-3.69169	-6.30653
GO:0000022	mitotic spindle elongation	0	-3.53112	-6.05868
GO:0042393	histone binding	0	-5.9586	-4.84997
GO:0098760	response to interleukin-7	0	-4.33374	-5.30917
GO:0043531	ADP binding	0	-5.34498	-5.65659
GO:0000027	ribosomal large subunit assembly	0	-5.47013	-2.07109
GO:0033120	positive regulation of RNA splicing	0	-5.44343	-2.10824
R-MMU-72165	mRNA Splicing - Minor Pathway	0	-5.59847	-2.17084
GO:0000245	spliceosomal complex assembly	0	-4.78422	-3.12564
R-MMU-3371511	HSF1 activation	0	-4.60156	-3.69321
GO:0019843	rRNA binding	0	-13.6814	-3.75554
GO:0006284	base-excision repair	0	-6.30895	-3.41102
CORUM:3047	Parvulin-associated pre-rRNP complex	0	-40.479	-3.89561
WP246	TNF-alpha NF-kB signaling pathway	0	-11.9234	0
R-MMU-6782210	Gap-filling DNA repair synthesis and ligation in TC-NER	0	-7.69139	0
GO:0003725	double-stranded RNA binding	0	-5.11238	0
GO:0030621	U4 snRNA binding	0	-5.72159	0
GO:0016835	carbon-oxygen lyase activity	0	-4.47263	0
M00085	Fatty acid biosynthesis, elongation, mitochondria	0	-5.25318	0
R-MMU-9013418	RHOBTB2 GTPase cycle	0	-5.02743	0
GO:0051575	5'-deoxyribose-5-phosphate lyase activity	0	-4.8939	0
GO:0010032	meiotic chromosome condensation	0	-4.8939	0
R-MMU-68875	Mitotic Prophase	0	-2.61679	0
R-MMU-68884	Mitotic Telophase/Cytokinesis	0	-3.78675	0
GO:0031570	DNA integrity checkpoint signaling	0	0	-4.76217
GO:0030473	nuclear migration along microtubule	0	0	-4.42613
GO:0051656	establishment of organelle localization	0	0	-6.70979
GO:0140142	nucleocytoplasmic carrier activity	-6.13454	-3.23152	0
GO:0016874	ligase activity	-6.26112	-5.41842	0
GO:0031369	translation initiation factor binding	-4.11252	-4.42096	0
GO:1902415	regulation of mRNA binding	-5.43916	-5.66075	0
GO:0008631	intrinsic apoptotic signaling pathway in response to oxidative stress	-4.81546	-3.86846	0
GO:2001242	regulation of intrinsic apoptotic signaling pathway	-5.12251	-3.29691	0
GO:0140104	molecular carrier activity	-5.89769	-2.15253	0
GO:0050821	protein stabilization	-3.38066	-5.83407	0
WP435	One-carbon metabolism	-3.46164	-4.15908	0
GO:0051082	unfolded protein binding	-3.23054	-6.5521	0
GO:0003727	single-stranded RNA binding	-3.00748	-7.74282	0
GO:0042162	telomeric DNA binding	-2.10433	-4.66619	0
GO:0051287	NAD binding	-2.17276	-5.40122	0
GO:0043021	ribonucleoprotein complex binding	-6.14904	-10.4282	0
GO:0140097	catalytic activity, acting on DNA	-4.87467	-11.6285	0
GO:0075525	viral translational termination-reinitiation	-7.04234	-8.01688	0
GO:0003697	single-stranded DNA binding	-6.65985	-8.76928	0
GO:0072376	protein activation cascade	-4.9191	0	0
CORUM:5142	DCS complex (Ptbp1, Ptbp2, Hnrph1, Hnrpf)	-5.20199	0	0
CORUM:973	Sec61alpha-CollagenIV-Hsp47 complex	-5.80027	0	0
GO:1903047	mitotic cell cycle process	-2.79854	-7.18595	-6.13113
R-MMU-8953897	Cellular responses to stimuli	-2.18996	-7.26488	-8.73684
R-MMU-69620	Cell Cycle Checkpoints	-2.8669	-8.30578	-5.20076
GO:0006974	cellular response to DNA damage stimulus	-2.72233	-8.17256	-4.85896
GO:0071826	ribonucleoprotein complex subunit organization	-2.91552	-20.7975	-8.47793
GO:0030515	snoRNA binding	-3.29344	-4.93854	-2.81893
GO:0035198	miRNA binding	-2.13953	-4.7537	-2.71915
R-MMU-2995410	Nuclear Envelope (NE) Reassembly	-2.27197	-8.64103	-3.45428
R-MMU-437239	Recycling pathway of L1	-2.10433	-6.84863	-3.69001
ko04110	Cell cycle	-2.4655	-6.29937	-2.45935
GO:0010564	regulation of cell cycle process	-2.32874	-3.23976	-4.79333
GO:0042826	histone deacetylase binding	-3.02625	-3.91443	-4.34061
GO:0001568	blood vessel development	-2.47177	-3.16015	-7.98274
GO:0006356	regulation of transcription by RNA polymerase I	-3.19092	-3.75313	-6.08358
GO:0043414	macromolecule methylation	-3.45762	-5.32331	-6.86119
GO:0016572	histone phosphorylation	-3.0493	-5.52825	-3.57316
ko01230	Biosynthesis of amino acids	-3.51269	-4.61757	-5.43639
GO:0008134	transcription factor binding	-2.26703	-4.12976	-5.13472
GO:0006091	generation of precursor metabolites and energy	-3.77366	-3.66223	-3.33044
GO:0007000	nucleolus organization	-3.02051	-2.08871	-3.91764
R-MMU-422475	Axon guidance	-4.28533	-5.67752	-4.85317
GO:0035987	endodermal cell differentiation	-4.70126	-4.15908	-4.09326
GO:0055086	nucleobase-containing small molecule metabolic process	-4.90231	-5.09763	-3.22197
GO:0070828	heterochromatin organization	-6.75329	-4.31976	-5.7889
GO:0004656	procollagen-proline 4-dioxygenase activity	-4.80783	-3.82399	-4.42613
R-MMU-3000157	Laminin interactions	-5.03398	-3.4718	-4.42021
GO:0006913	nucleocytoplasmic transport	-5.10801	-7.18655	-6.57792
GO:0034502	protein localization to chromosome	-4.76604	-6.93753	-5.56661
GO:0048029	monosaccharide binding	-4.01391	-4.03512	-6.72813
mmu03008	Ribosome biogenesis in eukaryotes	-6.88261	-10.0219	-5.62213
GO:0048027	mRNA 5'-UTR binding	-6.03813	-13.2148	-4.09326
GO:0003682	chromatin binding	-9.82446	-10.1425	-7.91786
GO:0140657	ATP-dependent activity	-6.35116	-21.68	-7.4239
WP310	mRNA processing	-9.82594	-42.9578	-7.82467
GO:0051052	regulation of DNA metabolic process	-4.24485	-10.8185	-7.23473
GO:0042274	ribosomal small subunit biogenesis	-5.70586	-16.4376	-4.77071
R-MMU-69278	Cell Cycle, Mitotic	-3.58162	-17.022	-8.23222
GO:0042273	ribosomal large subunit biogenesis	-4.67213	-27.1641	-10.067
GO:0071103	DNA conformation change	-13.4798	-16.0895	-5.36986
GO:0006412	translation	-13.5545	-39.1377	-4.13117
GO:0003729	mRNA binding	-17.22	-28.1498	-3.62143
GO:0045182	translation regulator activity	-8.92035	-15.8528	-3.40161
GO:0006403	RNA localization	-6.84212	-12.6134	-3.35437
GO:0140640	catalytic activity, acting on a nucleic acid	-9.73622	-17.6569	-2.36071
GO:1901607	alpha-amino acid biosynthetic process	-4.2739	-7.87108	-2.70163
GO:0006541	glutamine metabolic process	-4.02835	-6.29645	-2.38326
R-MMU-8953854	Metabolism of RNA	-10.2179	-76.4647	-20.0214
GO:0022613	ribonucleoprotein complex biogenesis	-15.7622	-64.8126	-24.1917
R-MMU-1650814	Collagen biosynthesis and modifying enzymes	-25.2226	-19.6633	-22.5057
