# Supplementary material for: Epigenetic mechanisms of Strip2 in differentiation of pluripotent stem cells
Source: Cell Death Discov. 2022 Nov 5;8:447. doi: 10.1038/s41420-022-01237-5 (PMC9637104; doi:10.1038/s41420-022-01237-5)
Supplement: Supplementary file 12 — Table S3 [file 41420_2022_1237_MOESM12_ESM.xlsx]

## Sheet: GO_TRRUST
_MEMBER_D16	_MEMBER_D4	_MEMBER_ESCs	_LogP_D16	_LogP_D4	_LogP_ESCs	GO	_PATTERN_	_RANK_	GiniIndex	Category	CategoryID	Description	PARENT_GO	LogP	Enrichment	Z-score	#TotalGeneInLibrary	#GeneInGO	#GeneInHitList	#GeneInGOAndHitList	%InGO	STDV %InGO	GeneID	Hits	Log(q-value)	EvidenceCutoff
1	1	1	-4.8	-2.3	-2.9	TRR01517	M111	3	0	TRRUST	34	Regulated by: Usf2		-4.8	24	9.5	20504	14	240	4	1.7	0.83	12842|14104|14265|17748	Col1a1|Fasn|Fmr1|Mt1	-2.6	0
0	1	1	0	-3.1	-4.4	TRR01347	M011	2	0	TRRUST	34	Regulated by: Sp1		-4.4	3.4	5.1	20504	280	322	15	4.7	1.2	11545|11739|11758|12824|12831|12842|12843|13008|13433|14265|14584|15364|16852|16905|20527	Parp1|Slc25a4|Prdx6|Col2a1|Col5a1|Col1a1|Col1a2|Csrp2|Dnmt1|Fmr1|Gfpt2|Hmga2|Lgals1|Lmna|Slc2a3	-2.3	0
1	0	1	-4	0	-2.4	TRR01516	M101	2	0	TRRUST	34	Regulated by: Usf1		-4	16	7.6	20504	21	240	4	1.7	0.83	12842|14104|14265|17748	Col1a1|Fasn|Fmr1|Mt1	-2	0
1	1	1	-4	-2.2	-3.3	TRR00315	M111	3	0	TRRUST	34	Regulated by: Ep300		-4	7.9	6.1	20504	65	240	6	2.5	1	12843|13433|14104|14268|16828|17748	Col1a2|Dnmt1|Fasn|Fn1|Ldha|Mt1	-2	0
1	1	1	-2.6	-2.6	-3.3	TRR01313	M111	3	0	TRRUST	34	Regulated by: Smad1		-3.3	11	6	20504	24	322	4	1.2	0.62	12824|12826|12827|12842	Col2a1|Col4a1|Col4a2|Col1a1	-1.4	0
0	1	0	0	-3.1	0	TRR00614	M010	1	0	TRRUST	34	Regulated by: Id3		-3.1	15	6.3	20504	8	513	3	0.58	0.34	11647|12843|20588	Alpl|Col1a2|Smarcc1	-1.3	0
0	0	1	0	0	-3	TRR01123	M001	1	0	TRRUST	34	Regulated by: Pou5f1		-3	9.1	5.4	20504	28	322	4	1.2	0.62	13626|20674|22286|51869	Eed|Sox2|Utf1|Rif1	-1.3	0
0	0	1	0	0	-3	TRR01339	M001	1	0	TRRUST	34	Regulated by: Sox2		-3	9.1	5.4	20504	28	322	4	1.2	0.62	11799|20674|22286|332221	Birc5|Sox2|Utf1|Zscan10	-1.3	0
0	1	0	0	-2.8	0	TRR00238	M010	1	0	TRRUST	34	Regulated by: E2f1		-2.8	4.8	4.3	20504	50	513	6	1.2	0.47	13361|13433|14119|15361|18538|77579	Dhfr|Dnmt1|Fbn2|Hmga1|Pcna|Myh10	-1.1	0
1	1	0	-2.5	-2.7	0	TRR00838	M110	2	0	TRRUST	34	Regulated by: Myc		-2.7	4.6	4.2	20504	52	513	6	1.2	0.47	15382|19231|53379|67134|69719|268697	Hnrnpa1|Ptma|Hnrnpa2b1|Nop56|Cad|Ccnb1	-1.1	0
1	0	1	-2.6	0	-2.3	TRR00997	M101	2	0	TRRUST	34	Regulated by: Nrf1		-2.6	11	5.3	20504	23	240	3	1.2	0.72	14265|17748|21780	Fmr1|Mt1|Tfam	-0.98	0
1	0	1	-2.5	0	-2	TRR01315	M101	2	0	TRRUST	34	Regulated by: Smad3		-2.5	6.6	4.4	20504	52	240	4	1.7	0.83	12843|14268|16859|51869	Col1a2|Fn1|Lgals9|Rif1	-0.92	0
