# Supplementary material for: Epigenetic mechanisms of Strip2 in differentiation of pluripotent stem cells
Source: Cell Death Discov. 2022 Nov 5;8:447. doi: 10.1038/s41420-022-01237-5 (PMC9637104; doi:10.1038/s41420-022-01237-5)
Supplement: Supplementary file 13 — Table S4 [file 41420_2022_1237_MOESM13_ESM.xlsx]

## Sheet: GO_MCODE
Name	Category	CategoryID	GO	Description	PARENT_GO	LogP	Enrichment	Z-score	#TotalGeneInLibrary	#GeneInGO	#GeneInHitList	#GeneInGOAndHitList	%InGO	STDV %InGO	GeneID	Hits	Log(q-value)
D16	Reactome Gene Sets	6	R-MMU-1650814	Collagen biosynthesis and modifying enzymes		-26	33	26	20504	60	215	21	9.8	2	12406|12814|12819|12822|12825|12826|12827|12831|12832|12833|12834|12842|12843|18451|18452|18453|18822|19035|26432|26433|234407	Serpinh1|Col11a1|Col15a1|Col18a1|Col3a1|Col4a1|Col4a2|Col5a1|Col5a2|Col6a1|Col6a2|Col1a1|Col1a2|P4ha1|P4ha2|P4hb|Plod1|Ppib|Plod2|Plod3|Colgalt1	-24
D16	Reactome Gene Sets	6	R-MMU-1474290	Collagen formation		-23	25	22	20504	81	215	21	9.8	2	12406|12814|12819|12822|12825|12826|12827|12831|12832|12833|12834|12842|12843|18451|18452|18453|18822|19035|26432|26433|234407	Serpinh1|Col11a1|Col15a1|Col18a1|Col3a1|Col4a1|Col4a2|Col5a1|Col5a2|Col6a1|Col6a2|Col1a1|Col1a2|P4ha1|P4ha2|P4hb|Plod1|Ppib|Plod2|Plod3|Colgalt1	-21
D16	Reactome Gene Sets	6	R-MMU-1474244	Extracellular matrix organization		-21	11	16	20504	256	215	29	13	2.3	12406|12814|12819|12822|12825|12826|12827|12831|12832|12833|12834|12842|12843|13138|14118|14119|14161|14268|15530|18074|18451|18452|18453|18822|19035|26432|26433|99571|234407	Serpinh1|Col11a1|Col15a1|Col18a1|Col3a1|Col4a1|Col4a2|Col5a1|Col5a2|Col6a1|Col6a2|Col1a1|Col1a2|Dag1|Fbn1|Fbn2|Fga|Fn1|Hspg2|Nid2|P4ha1|P4ha2|P4hb|Plod1|Ppib|Plod2|Plod3|Fgg|Colgalt1	-19
D16	GO Molecular Functions	21	GO:0005201	extracellular matrix structural constituent		-18	14	16	20504	149	215	22	10	2.1	12814|12819|12822|12825|12826|12827|12831|12832|12833|12834|12835|12842|12843|14118|14119|14161|14268|15530|18074|21810|99571|226519	Col11a1|Col15a1|Col18a1|Col3a1|Col4a1|Col4a2|Col5a1|Col5a2|Col6a1|Col6a2|Col6a3|Col1a1|Col1a2|Fbn1|Fbn2|Fga|Fn1|Hspg2|Nid2|Tgfbi|Fgg|Lamc1	-17
D16	GO Biological Processes	19	GO:0034660	ncRNA metabolic process	19_GO:0008152 metabolic process	-18	6.9	13	20504	456	215	33	15	2.5	18813|20044|20085|28114|53379|53414|64934|66229|67459|67755|69237|69663|70223|70769|71990|72515|72554|72662|74778|75416|76130|100019|104458|105148|107045|107071|107094|110960|216443|217995|223499|234374|353172	Pa2g4|Rps14|Rps19|Nsun2|Hnrnpa2b1|Bysl|Pes1|Rpl7l1|Nvl|Ddx47|Gtpbp4|Ddx51|Nars|Nolc1|Ddx54|Wdr43|Utp14a|Dis3|Rrp7a|Nop14|Las1l|Mdn1|Rars|Iars|Lars|Wdr74|Rrp12|Tars|Mars1|Heatr1|Dcaf13|Ddx49|Gars	-16
D16	GO Molecular Functions	21	GO:0003729	mRNA binding		-18	7.8	14	20504	366	215	30	14	2.4	11991|12317|12785|12847|13669|14265|15387|18746|19205|20044|20218|23881|30877|52502|52874|53319|53379|55944|56195|56449|57320|66055|72322|72692|74326|108037|140488|208643|229317|230257	Hnrnpd|Calr|Cnbp|Copa|Eif3a|Fmr1|Hnrnpk|Pkm|Ptbp1|Rps14|Khdrbs1|G3bp2|Gnl3|Carhsp1|Pum3|Nxf1|Hnrnpa2b1|Eif3d|Ptbp2|Ybx3|Park7|Sf3b6|Xpo5|Hnrnpll|Hnrnpr|Shmt2|Igf2bp3|Eif4g1|Eif2a|Ptbp3	-16
D16	GO Molecular Functions	21	GO:0030020	extracellular matrix structural constituent conferring tensile strength		-16	33	20	20504	38	215	13	6	1.6	12814|12819|12822|12825|12826|12827|12831|12832|12833|12834|12835|12842|12843	Col11a1|Col15a1|Col18a1|Col3a1|Col4a1|Col4a2|Col5a1|Col5a2|Col6a1|Col6a2|Col6a3|Col1a1|Col1a2	-14
D16	GO Biological Processes	19	GO:0006364	rRNA processing	19_GO:0008152 metabolic process	-16	10	14	20504	214	215	23	11	2.1	18813|20044|20085|53414|64934|66229|67459|67755|69237|69663|71990|72515|72554|72662|74778|75416|76130|100019|107071|107094|217995|223499|234374	Pa2g4|Rps14|Rps19|Bysl|Pes1|Rpl7l1|Nvl|Ddx47|Gtpbp4|Ddx51|Ddx54|Wdr43|Utp14a|Dis3|Rrp7a|Nop14|Las1l|Mdn1|Wdr74|Rrp12|Heatr1|Dcaf13|Ddx49	-14
D16	GO Biological Processes	19	GO:0016072	rRNA metabolic process	19_GO:0008152 metabolic process	-16	9.8	14	20504	224	215	23	11	2.1	18813|20044|20085|53414|64934|66229|67459|67755|69237|69663|71990|72515|72554|72662|74778|75416|76130|100019|107071|107094|217995|223499|234374	Pa2g4|Rps14|Rps19|Bysl|Pes1|Rpl7l1|Nvl|Ddx47|Gtpbp4|Ddx51|Ddx54|Wdr43|Utp14a|Dis3|Rrp7a|Nop14|Las1l|Mdn1|Wdr74|Rrp12|Heatr1|Dcaf13|Ddx49	-14
D16	GO Biological Processes	19	GO:0022613	ribonucleoprotein complex biogenesis	19_GO:0009987 cellular process	-15	6.7	12	20504	412	215	29	13	2.3	13669|18813|20044|20085|53414|55944|56195|64934|66229|67459|67755|68879|69237|69663|71990|72515|72554|72662|74778|75416|76130|100019|103573|107071|107094|217995|223499|229317|234374	Eif3a|Pa2g4|Rps14|Rps19|Bysl|Eif3d|Ptbp2|Pes1|Rpl7l1|Nvl|Ddx47|Prpf6|Gtpbp4|Ddx51|Ddx54|Wdr43|Utp14a|Dis3|Rrp7a|Nop14|Las1l|Mdn1|Xpo1|Wdr74|Rrp12|Heatr1|Dcaf13|Eif2a|Ddx49	-14
D16	Reactome Gene Sets	6	R-MMU-216083	Integrin cell surface interactions		-15	20	17	20504	70	215	15	7	1.7	12822|12825|12826|12827|12831|12832|12833|12834|12842|12843|14118|14161|14268|15530|99571	Col18a1|Col3a1|Col4a1|Col4a2|Col5a1|Col5a2|Col6a1|Col6a2|Col1a1|Col1a2|Fbn1|Fga|Fn1|Hspg2|Fgg	-14
D16	GO Biological Processes	19	GO:0042254	ribosome biogenesis	19_GO:0009987 cellular process	-15	8.1	13	20504	296	215	25	12	2.2	18813|20044|20085|53414|64934|66229|67459|67755|69237|69663|71990|72515|72554|72662|74778|75416|76130|100019|103573|107071|107094|217995|223499|229317|234374	Pa2g4|Rps14|Rps19|Bysl|Pes1|Rpl7l1|Nvl|Ddx47|Gtpbp4|Ddx51|Ddx54|Wdr43|Utp14a|Dis3|Rrp7a|Nop14|Las1l|Mdn1|Xpo1|Wdr74|Rrp12|Heatr1|Dcaf13|Eif2a|Ddx49	-13
D16	GO Biological Processes	19	GO:0071103	DNA conformation change	19_GO:0009987 cellular process	-14	9.9	13	20504	203	215	21	9.8	2	12534|14958|15201|15364|15441|16952|17215|17219|21969|21973|26914|50708|50709|53379|54392|56702|68275|68298|73139|243529|268697	Cdk1|H1f0|Hells|Hmga2|Hp1bp3|Anxa1|Mcm3|Mcm6|Top1|Top2a|Macroh2a1|H1f2|H1f4|Hnrnpa2b1|Ncapg|H1f5|Rpa1|Ncapd2|Cenpv|H1f10|Ccnb1	-13
D16	GO Biological Processes	19	GO:0006412	translation	19_GO:0008152 metabolic process	-14	4.9	11	20504	677	215	35	16	2.5	11991|12317|12785|13669|14265|14433|16341|17454|18746|18813|20044|20085|20218|27979|52874|53872|55944|56347|68015|70223|70769|74326|104458|105148|107045|108037|110960|140488|208643|216443|223691|224742|226982|229317|353172	Hnrnpd|Calr|Cnbp|Eif3a|Fmr1|Gapdh|Eif3e|Mov10|Pkm|Pa2g4|Rps14|Rps19|Khdrbs1|Eif3b|Pum3|Caprin1|Eif3d|Eif3c|Trap1|Nars|Nolc1|Hnrnpr|Rars|Iars|Lars|Shmt2|Tars|Igf2bp3|Eif4g1|Mars1|Eif3l|Abcf1|Eif5b|Eif2a|Gars	-13
D16	Reactome Gene Sets	6	R-MMU-8948216	Collagen chain trimerization		-14	29	18	20504	40	215	12	5.6	1.6	12814|12819|12822|12825|12826|12827|12831|12832|12833|12834|12842|12843	Col11a1|Col15a1|Col18a1|Col3a1|Col4a1|Col4a2|Col5a1|Col5a2|Col6a1|Col6a2|Col1a1|Col1a2	-13
D16	GO Biological Processes	19	GO:0043043	peptide biosynthetic process	19_GO:0008152 metabolic process	-14	4.8	10	20504	701	215	35	16	2.5	11991|12317|12785|13669|14265|14433|16341|17454|18746|18813|20044|20085|20218|27979|52874|53872|55944|56347|68015|70223|70769|74326|104458|105148|107045|108037|110960|140488|208643|216443|223691|224742|226982|229317|353172	Hnrnpd|Calr|Cnbp|Eif3a|Fmr1|Gapdh|Eif3e|Mov10|Pkm|Pa2g4|Rps14|Rps19|Khdrbs1|Eif3b|Pum3|Caprin1|Eif3d|Eif3c|Trap1|Nars|Nolc1|Hnrnpr|Rars|Iars|Lars|Shmt2|Tars|Igf2bp3|Eif4g1|Mars1|Eif3l|Abcf1|Eif5b|Eif2a|Gars	-12
D16	GO Molecular Functions	21	GO:0005198	structural molecule activity		-14	5.2	11	20504	585	215	32	15	2.4	12814|12819|12822|12825|12826|12827|12831|12832|12833|12834|12835|12842|12843|12847|13138|14118|14119|14161|14268|15530|18074|20044|20085|21810|22145|22152|50797|59042|66229|99571|226519|267019	Col11a1|Col15a1|Col18a1|Col3a1|Col4a1|Col4a2|Col5a1|Col5a2|Col6a1|Col6a2|Col6a3|Col1a1|Col1a2|Copa|Dag1|Fbn1|Fbn2|Fga|Fn1|Hspg2|Nid2|Rps14|Rps19|Tgfbi|Tuba4a|Tubb3|Copb2|Cope|Rpl7l1|Fgg|Lamc1|Rps15a	-12
D16	Reactome Gene Sets	6	R-MMU-1442490	Collagen degradation		-14	25	17	20504	45	215	12	5.6	1.6	12814|12819|12822|12825|12826|12827|12831|12832|12833|12834|12842|12843	Col11a1|Col15a1|Col18a1|Col3a1|Col4a1|Col4a2|Col5a1|Col5a2|Col6a1|Col6a2|Col1a1|Col1a2	-12
D16	GO Biological Processes	19	GO:0034470	ncRNA processing	19_GO:0008152 metabolic process	-13	6.6	11	20504	362	215	25	12	2.2	18813|20044|20085|28114|53379|53414|64934|66229|67459|67755|69237|69663|71990|72515|72554|72662|74778|75416|76130|100019|107071|107094|217995|223499|234374	Pa2g4|Rps14|Rps19|Nsun2|Hnrnpa2b1|Bysl|Pes1|Rpl7l1|Nvl|Ddx47|Gtpbp4|Ddx51|Ddx54|Wdr43|Utp14a|Dis3|Rrp7a|Nop14|Las1l|Mdn1|Wdr74|Rrp12|Heatr1|Dcaf13|Ddx49	-11
D16	Reactome Gene Sets	6	R-MMU-1474228	Degradation of the extracellular matrix		-13	13	13	20504	119	215	16	7.4	1.8	12814|12819|12822|12825|12826|12827|12831|12832|12833|12834|12842|12843|14118|14119|14268|15530	Col11a1|Col15a1|Col18a1|Col3a1|Col4a1|Col4a2|Col5a1|Col5a2|Col6a1|Col6a2|Col1a1|Col1a2|Fbn1|Fbn2|Fn1|Hspg2	-11
D16	Reactome Gene Sets	6	R-MMU-2022090	Assembly of collagen fibrils and other multimeric structures		-12	20	15	20504	56	215	12	5.6	1.6	12814|12819|12822|12825|12826|12827|12831|12832|12833|12834|12842|12843	Col11a1|Col15a1|Col18a1|Col3a1|Col4a1|Col4a2|Col5a1|Col5a2|Col6a1|Col6a2|Col1a1|Col1a2	-11
D16	GO Biological Processes	19	GO:0030261	chromosome condensation	19_GO:0009987 cellular process	-12	23	15	20504	45	215	11	5.1	1.5	12534|14958|15364|21973|50708|50709|54392|56702|68298|243529|268697	Cdk1|H1f0|Hmga2|Top2a|H1f2|H1f4|Ncapg|H1f5|Ncapd2|H1f10|Ccnb1	-10
D16	GO Biological Processes	19	GO:0010608	posttranscriptional regulation of gene expression	19_GO:0008152 metabolic process	-11	4.7	9.4	20504	583	215	29	13	2.3	11991|12317|12785|14265|14433|16341|17454|18746|18813|20218|27979|28114|52502|52874|53379|53872|55944|68015|70769|72322|74326|108037|140488|208643|224742|226982|227695|229317|234374	Hnrnpd|Calr|Cnbp|Fmr1|Gapdh|Eif3e|Mov10|Pkm|Pa2g4|Khdrbs1|Eif3b|Nsun2|Carhsp1|Pum3|Hnrnpa2b1|Caprin1|Eif3d|Trap1|Nolc1|Xpo5|Hnrnpr|Shmt2|Igf2bp3|Eif4g1|Abcf1|Eif5b|Spout1|Eif2a|Ddx49	-9.9
D16	Reactome Gene Sets	6	R-MMU-8953854	Metabolism of RNA		-11	4.9	9.5	20504	546	215	28	13	2.3	11991|15387|20044|20085|30877|53319|53379|53414|59013|64934|66055|67755|68278|68879|72515|72554|72662|74326|74351|74778|75416|76130|103573|208643|217995|223499|234374|267019	Hnrnpd|Hnrnpk|Rps14|Rps19|Gnl3|Nxf1|Hnrnpa2b1|Bysl|Hnrnph1|Pes1|Sf3b6|Ddx47|Ddx39a|Prpf6|Wdr43|Utp14a|Dis3|Hnrnpr|Ddx23|Rrp7a|Nop14|Las1l|Xpo1|Eif4g1|Heatr1|Dcaf13|Ddx49|Rps15a	-9.8
D16	Reactome Gene Sets	6	R-MMU-3000171	Non-integrin membrane-ECM interactions		-11	25	15	20504	38	215	10	4.7	1.4	12814|12825|12826|12827|12831|12832|12842|12843|14268|15530	Col11a1|Col3a1|Col4a1|Col4a2|Col5a1|Col5a2|Col1a1|Col1a2|Fn1|Hspg2	-9.8
D16	GO Molecular Functions	21	GO:0031492	nucleosomal DNA binding		-11	40	18	20504	19	215	8	3.7	1.3	14958|15312|15364|26914|50708|50709|56702|243529	H1f0|Hmgn1|Hmga2|Macroh2a1|H1f2|H1f4|H1f5|H1f10	-9.5
D16	KEGG Pathway	24	ko04974	Protein digestion and absorption		-11	14	13	20504	90	215	13	6	1.6	12814|12819|12822|12825|12826|12827|12831|12832|12833|12834|12835|12842|12843	Col11a1|Col15a1|Col18a1|Col3a1|Col4a1|Col4a2|Col5a1|Col5a2|Col6a1|Col6a2|Col6a3|Col1a1|Col1a2	-9.5
D16	GO Molecular Functions	21	GO:0140640	catalytic activity, acting on a nucleic acid		-11	4.7	9.1	20504	573	215	28	13	2.3	13433|13435|13436|15201|15364|16881|16952|17215|17219|17454|19205|21969|21973|28114|67755|68278|69663|70223|71990|72662|74351|104458|105148|107045|110960|216443|234374|353172	Dnmt1|Dnmt3a|Dnmt3b|Hells|Hmga2|Lig1|Anxa1|Mcm3|Mcm6|Mov10|Ptbp1|Top1|Top2a|Nsun2|Ddx47|Ddx39a|Ddx51|Nars|Ddx54|Dis3|Ddx23|Rars|Iars|Lars|Tars|Mars1|Ddx49|Gars	-9.4
D16	WikiPathways	27	WP310	mRNA processing		-11	5.3	9.4	20504	453	215	25	12	2.2	11991|14265|15384|15387|19205|20044|27979|50926|52874|53319|53379|53610|56195|57320|59013|66055|66645|68278|68879|71514|72662|72692|74326|140488|230257	Hnrnpd|Fmr1|Hnrnpab|Hnrnpk|Ptbp1|Rps14|Eif3b|Hnrnpdl|Pum3|Nxf1|Hnrnpa2b1|Nono|Ptbp2|Park7|Hnrnph1|Sf3b6|Pspc1|Ddx39a|Prpf6|Sfpq|Dis3|Hnrnpll|Hnrnpr|Igf2bp3|Ptbp3	-9.4
D16	KEGG Pathway	24	mmu04974	Protein digestion and absorption		-11	13	12	20504	93	215	13	6	1.6	12814|12819|12822|12825|12826|12827|12831|12832|12833|12834|12835|12842|12843	Col11a1|Col15a1|Col18a1|Col3a1|Col4a1|Col4a2|Col5a1|Col5a2|Col6a1|Col6a2|Col6a3|Col1a1|Col1a2	-9.3
D16	GO Biological Processes	19	GO:0030199	collagen fibril organization	19_GO:0009987 cellular process	-11	18	13	20504	59	215	11	5.1	1.5	12306|12406|12814|12825|12831|12832|12842|12843|18451|26433|234407	Anxa2|Serpinh1|Col11a1|Col3a1|Col5a1|Col5a2|Col1a1|Col1a2|P4ha1|Plod3|Colgalt1	-9.2
D16	Reactome Gene Sets	6	R-MMU-3000178	ECM proteoglycans		-11	22	14	20504	44	215	10	4.7	1.4	12825|12831|12832|12833|12834|12842|12843|13138|14268|15530	Col3a1|Col5a1|Col5a2|Col6a1|Col6a2|Col1a1|Col1a2|Dag1|Fn1|Hspg2	-9.2
D16	GO Biological Processes	19	GO:0006417	regulation of translation	19_GO:0008152 metabolic process	-11	5.6	9.5	20504	391	215	23	11	2.1	11991|12317|12785|14265|14433|16341|17454|18746|18813|20218|27979|52874|53872|55944|68015|70769|74326|108037|140488|208643|224742|226982|229317	Hnrnpd|Calr|Cnbp|Fmr1|Gapdh|Eif3e|Mov10|Pkm|Pa2g4|Khdrbs1|Eif3b|Pum3|Caprin1|Eif3d|Trap1|Nolc1|Hnrnpr|Shmt2|Igf2bp3|Eif4g1|Abcf1|Eif5b|Eif2a	-9.1
D16	Reactome Gene Sets	6	R-MMU-8868773	rRNA processing in the nucleus and cytosol		-10	8.9	11	20504	171	215	16	7.4	1.8	20044|20085|30877|53414|64934|67755|72515|72554|72662|74778|75416|76130|217995|223499|234374|267019	Rps14|Rps19|Gnl3|Bysl|Pes1|Ddx47|Wdr43|Utp14a|Dis3|Rrp7a|Nop14|Las1l|Heatr1|Dcaf13|Ddx49|Rps15a	-9
D16	Reactome Gene Sets	6	R-MMU-6791226	Major pathway of rRNA processing in the nucleolus and cytosol		-10	8.9	11	20504	171	215	16	7.4	1.8	20044|20085|30877|53414|64934|67755|72515|72554|72662|74778|75416|76130|217995|223499|234374|267019	Rps14|Rps19|Gnl3|Bysl|Pes1|Ddx47|Wdr43|Utp14a|Dis3|Rrp7a|Nop14|Las1l|Heatr1|Dcaf13|Ddx49|Rps15a	-9
D16	Reactome Gene Sets	6	R-MMU-72312	rRNA processing		-10	8.9	11	20504	171	215	16	7.4	1.8	20044|20085|30877|53414|64934|67755|72515|72554|72662|74778|75416|76130|217995|223499|234374|267019	Rps14|Rps19|Gnl3|Bysl|Pes1|Ddx47|Wdr43|Utp14a|Dis3|Rrp7a|Nop14|Las1l|Heatr1|Dcaf13|Ddx49|Rps15a	-9
D16	GO Molecular Functions	21	GO:0003682	chromatin binding		-10	4.3	8.7	20504	649	215	29	13	2.3	11991|12534|13433|13435|13436|14265|14958|15201|15312|15364|15441|16468|18140|18392|19664|21780|21969|21973|22715|26914|50708|50709|53610|56702|68275|68298|71514|108037|243529	Hnrnpd|Cdk1|Dnmt1|Dnmt3a|Dnmt3b|Fmr1|H1f0|Hells|Hmgn1|Hmga2|Hp1bp3|Jarid2|Uhrf1|Orc1|Rbpj|Tfam|Top1|Top2a|Zfp57|Macroh2a1|H1f2|H1f4|Nono|H1f5|Rpa1|Ncapd2|Sfpq|Shmt2|H1f10	-8.9
D16	GO Biological Processes	19	GO:0034248	regulation of cellular amide metabolic process	19_GO:0008152 metabolic process	-10	5.1	9	20504	449	215	24	11	2.1	11991|12317|12759|12785|14265|14433|16341|17454|18746|18813|20218|27979|52874|53872|55944|68015|70769|74326|108037|140488|208643|224742|226982|229317	Hnrnpd|Calr|Clu|Cnbp|Fmr1|Gapdh|Eif3e|Mov10|Pkm|Pa2g4|Khdrbs1|Eif3b|Pum3|Caprin1|Eif3d|Trap1|Nolc1|Hnrnpr|Shmt2|Igf2bp3|Eif4g1|Abcf1|Eif5b|Eif2a	-8.7
D16	GO Molecular Functions	21	GO:0031491	nucleosome binding		-10	19	13	20504	50	215	10	4.7	1.4	14958|15312|15364|15441|18140|26914|50708|50709|56702|243529	H1f0|Hmgn1|Hmga2|Hp1bp3|Uhrf1|Macroh2a1|H1f2|H1f4|H1f5|H1f10	-8.6
D16	GO Biological Processes	19	GO:0006323	DNA packaging	19_GO:0009987 cellular process	-10	9.2	11	20504	155	215	15	7	1.7	12534|14958|15201|15364|15441|21973|26914|50708|50709|54392|56702|68298|73139|243529|268697	Cdk1|H1f0|Hells|Hmga2|Hp1bp3|Top2a|Macroh2a1|H1f2|H1f4|Ncapg|H1f5|Ncapd2|Cenpv|H1f10|Ccnb1	-8.6
D16	GO Biological Processes	19	GO:0030198	extracellular matrix organization	19_GO:0009987 cellular process	-9.9	6.1	9.4	20504	312	215	20	9.3	2	12306|12406|12814|12819|12822|12825|12826|12827|12831|12832|12842|12843|13138|14268|15530|18451|21810|26433|226519|234407	Anxa2|Serpinh1|Col11a1|Col15a1|Col18a1|Col3a1|Col4a1|Col4a2|Col5a1|Col5a2|Col1a1|Col1a2|Dag1|Fn1|Hspg2|P4ha1|Tgfbi|Plod3|Lamc1|Colgalt1	-8.5
D16	GO Biological Processes	19	GO:0043062	extracellular structure organization	19_GO:0009987 cellular process	-9.9	6.1	9.3	20504	313	215	20	9.3	2	12306|12406|12814|12819|12822|12825|12826|12827|12831|12832|12842|12843|13138|14268|15530|18451|21810|26433|226519|234407	Anxa2|Serpinh1|Col11a1|Col15a1|Col18a1|Col3a1|Col4a1|Col4a2|Col5a1|Col5a2|Col1a1|Col1a2|Dag1|Fn1|Hspg2|P4ha1|Tgfbi|Plod3|Lamc1|Colgalt1	-8.5
D16	GO Biological Processes	19	GO:0045229	external encapsulating structure organization	19_GO:0009987 cellular process	-9.9	6.1	9.3	20504	314	215	20	9.3	2	12306|12406|12814|12819|12822|12825|12826|12827|12831|12832|12842|12843|13138|14268|15530|18451|21810|26433|226519|234407	Anxa2|Serpinh1|Col11a1|Col15a1|Col18a1|Col3a1|Col4a1|Col4a2|Col5a1|Col5a2|Col1a1|Col1a2|Dag1|Fn1|Hspg2|P4ha1|Tgfbi|Plod3|Lamc1|Colgalt1	-8.5
D16	GO Molecular Functions	21	GO:0045182	translation regulator activity		-9.5	9.5	10	20504	141	215	14	6.5	1.7	12785|13669|14265|16341|20044|27979|55944|56347|108037|208643|223691|224742|226982|229317	Cnbp|Eif3a|Fmr1|Eif3e|Rps14|Eif3b|Eif3d|Eif3c|Shmt2|Eif4g1|Eif3l|Abcf1|Eif5b|Eif2a	-8.2
D16	Reactome Gene Sets	6	R-MMU-72649	Translation initiation complex formation		-9.4	17	12	20504	57	215	10	4.7	1.4	13669|16341|20044|20085|27979|55944|56347|208643|223691|267019	Eif3a|Eif3e|Rps14|Rps19|Eif3b|Eif3d|Eif3c|Eif4g1|Eif3l|Rps15a	-8.1
D16	Reactome Gene Sets	6	R-MMU-72702	Ribosomal scanning and start codon recognition		-9.4	17	12	20504	57	215	10	4.7	1.4	13669|16341|20044|20085|27979|55944|56347|208643|223691|267019	Eif3a|Eif3e|Rps14|Rps19|Eif3b|Eif3d|Eif3c|Eif4g1|Eif3l|Rps15a	-8.1
D16	Reactome Gene Sets	6	R-MMU-72662	Activation of the mRNA upon binding of the cap-binding complex and eIFs, and subsequent binding to 43S		-9.4	16	12	20504	58	215	10	4.7	1.4	13669|16341|20044|20085|27979|55944|56347|208643|223691|267019	Eif3a|Eif3e|Rps14|Rps19|Eif3b|Eif3d|Eif3c|Eif4g1|Eif3l|Rps15a	-8
D16	Reactome Gene Sets	6	R-MMU-419037	NCAM1 interactions		-9.2	35	15	20504	19	215	7	3.3	1.2	12825|12826|12827|12831|12832|12833|12834	Col3a1|Col4a1|Col4a2|Col5a1|Col5a2|Col6a1|Col6a2	-7.9
D16	GO Molecular Functions	21	GO:0048407	platelet-derived growth factor binding		-9	48	17	20504	12	215	6	2.8	1.1	12825|12826|12831|12833|12842|12843	Col3a1|Col4a1|Col5a1|Col6a1|Col1a1|Col1a2	-7.6
D16	KEGG Pathway	24	ko04512	ECM-receptor interaction		-9	13	11	20504	83	215	11	5.1	1.5	12826|12827|12833|12834|12835|12842|12843|13138|14268|15530|226519	Col4a1|Col4a2|Col6a1|Col6a2|Col6a3|Col1a1|Col1a2|Dag1|Fn1|Hspg2|Lamc1	-7.6
D16	KEGG Pathway	24	mmu04512	ECM-receptor interaction		-8.9	12	11	20504	85	215	11	5.1	1.5	12826|12827|12833|12834|12835|12842|12843|13138|14268|15530|226519	Col4a1|Col4a2|Col6a1|Col6a2|Col6a3|Col1a1|Col1a2|Dag1|Fn1|Hspg2|Lamc1	-7.5
D16	Reactome Gene Sets	6	R-MMU-72695	Formation of the ternary complex, and subsequently, the 43S complex		-8.7	17	12	20504	50	215	9	4.2	1.4	13669|16341|20044|20085|27979|55944|56347|223691|267019	Eif3a|Eif3e|Rps14|Rps19|Eif3b|Eif3d|Eif3c|Eif3l|Rps15a	-7.3
D16	GO Biological Processes	19	GO:0006413	translational initiation	19_GO:0008152 metabolic process	-8.3	9.6	9.7	20504	119	215	12	5.6	1.6	13669|14265|16341|20218|27979|55944|56347|208643|223691|224742|226982|229317	Eif3a|Fmr1|Eif3e|Khdrbs1|Eif3b|Eif3d|Eif3c|Eif4g1|Eif3l|Abcf1|Eif5b|Eif2a	-7.1
D16	Reactome Gene Sets	6	R-MMU-8874081	MET activates PTK2 signaling		-8	25	13	20504	27	215	7	3.3	1.2	12814|12825|12831|12832|12842|12843|14268	Col11a1|Col3a1|Col5a1|Col5a2|Col1a1|Col1a2|Fn1	-6.8
D16	GO Molecular Functions	21	GO:0003743	translation initiation factor activity		-7.9	14	11	20504	61	215	9	4.2	1.4	13669|16341|27979|55944|56347|208643|223691|226982|229317	Eif3a|Eif3e|Eif3b|Eif3d|Eif3c|Eif4g1|Eif3l|Eif5b|Eif2a	-6.6
D16	Reactome Gene Sets	6	R-MMU-72706	GTP hydrolysis and joining of the 60S ribosomal subunit		-7.7	9.7	9.3	20504	108	215	11	5.1	1.5	13669|16341|20044|20085|27979|55944|56347|208643|223691|226982|267019	Eif3a|Eif3e|Rps14|Rps19|Eif3b|Eif3d|Eif3c|Eif4g1|Eif3l|Eif5b|Rps15a	-6.5
D16	GO Molecular Functions	21	GO:0090079	translation regulator activity, nucleic acid binding		-7.7	9.7	9.3	20504	108	215	11	5.1	1.5	13669|16341|27979|55944|56347|108037|208643|223691|224742|226982|229317	Eif3a|Eif3e|Eif3b|Eif3d|Eif3c|Shmt2|Eif4g1|Eif3l|Abcf1|Eif5b|Eif2a	-6.5
D16	GO Biological Processes	19	GO:0010216	maintenance of DNA methylation	19_GO:0008152 metabolic process	-7.5	48	15	20504	10	215	5	2.3	1	13433|13435|15201|18140|22715	Dnmt1|Dnmt3a|Hells|Uhrf1|Zfp57	-6.3
D16	Reactome Gene Sets	6	R-MMU-72613	Eukaryotic Translation Initiation		-7.4	9.1	9	20504	115	215	11	5.1	1.5	13669|16341|20044|20085|27979|55944|56347|208643|223691|226982|267019	Eif3a|Eif3e|Rps14|Rps19|Eif3b|Eif3d|Eif3c|Eif4g1|Eif3l|Eif5b|Rps15a	-6.3
D16	Reactome Gene Sets	6	R-MMU-72737	Cap-dependent Translation Initiation		-7.4	9.1	9	20504	115	215	11	5.1	1.5	13669|16341|20044|20085|27979|55944|56347|208643|223691|226982|267019	Eif3a|Eif3e|Rps14|Rps19|Eif3b|Eif3d|Eif3c|Eif4g1|Eif3l|Eif5b|Rps15a	-6.3
D16	KEGG Pathway	24	mmu03008	Ribosome biogenesis in eukaryotes		-7.4	9	8.9	20504	117	215	11	5.1	1.5	30877|53319|67459|69237|72515|72554|74778|100019|103573|140488|217995	Gnl3|Nxf1|Nvl|Gtpbp4|Wdr43|Utp14a|Rrp7a|Mdn1|Xpo1|Igf2bp3|Heatr1	-6.2
D16	Reactome Gene Sets	6	R-MMU-375165	NCAM signaling for neurite out-growth		-7.3	20	11	20504	34	215	7	3.3	1.2	12825|12826|12827|12831|12832|12833|12834	Col3a1|Col4a1|Col4a2|Col5a1|Col5a2|Col6a1|Col6a2	-6.1
D16	GO Biological Processes	19	GO:0075525	viral translational termination-reinitiation	19_GO:0016032 viral process	-7.2	76	17	20504	5	215	4	1.9	0.92	13669|27979|55944|223691	Eif3a|Eif3b|Eif3d|Eif3l	-6.1
D16	GO Molecular Functions	21	GO:0140657	ATP-dependent activity		-7.2	3.9	7	20504	541	215	22	10	2.1	12464|14828|15201|15525|16952|17215|17219|17454|18392|21973|27407|67459|67755|68015|68278|69663|71819|71990|74351|224742|234374|235661	Cct4|Hspa5|Hells|Hspa4|Anxa1|Mcm3|Mcm6|Mov10|Orc1|Top2a|Abcf2|Nvl|Ddx47|Trap1|Ddx39a|Ddx51|Kif23|Ddx54|Ddx23|Abcf1|Ddx49|Dync1li1	-6
D16	GO Molecular Functions	21	GO:0003697	single-stranded DNA binding		-7.1	8.5	8.6	20504	123	215	11	5.1	1.5	12785|15387|16952|17215|17219|19205|21969|50926|53379|56449|68275	Cnbp|Hnrnpk|Anxa1|Mcm3|Mcm6|Ptbp1|Top1|Hnrnpdl|Hnrnpa2b1|Ybx3|Rpa1	-6
D16	GO Biological Processes	19	GO:0070828	heterochromatin organization	19_GO:0009987 cellular process	-7.1	14	10	20504	53	215	8	3.7	1.3	13433|13435|13436|15201|15364|15441|51869|73139	Dnmt1|Dnmt3a|Dnmt3b|Hells|Hmga2|Hp1bp3|Rif1|Cenpv	-6
D16	GO Biological Processes	19	GO:0006520	cellular amino acid metabolic process	19_GO:0008152 metabolic process	-7	5.6	7.6	20504	257	215	15	7	1.7	14584|26432|26433|27053|51797|57320|69719|70223|104458|105148|107045|108037|110960|216443|353172	Gfpt2|Plod2|Plod3|Asns|Ctps|Park7|Cad|Nars|Rars|Iars|Lars|Shmt2|Tars|Mars1|Gars	-5.9
D16	Reactome Gene Sets	6	R-MMU-8875878	MET promotes cell motility		-7	18	11	20504	37	215	7	3.3	1.2	12814|12825|12831|12832|12842|12843|14268	Col11a1|Col3a1|Col5a1|Col5a2|Col1a1|Col1a2|Fn1	-5.9
D16	KEGG Functional Sets	26	mmu_M00359	Aminoacyl-tRNA biosynthesis, eukaryotes		-6.9	18	11	20504	38	215	7	3.3	1.2	70223|104458|105148|107045|110960|216443|353172	Nars|Rars|Iars|Lars|Tars|Mars1|Gars	-5.8
D16	KEGG Functional Sets	26	M00359	Aminoacyl-tRNA biosynthesis, eukaryotes		-6.9	18	11	20504	38	215	7	3.3	1.2	70223|104458|105148|107045|110960|216443|353172	Nars|Rars|Iars|Lars|Tars|Mars1|Gars	-5.8
D16	GO Biological Processes	19	GO:0006325	chromatin organization	19_GO:0009987 cellular process	-6.8	4	6.8	20504	477	215	20	9.3	2	13433|13435|13436|14958|15201|15312|15364|15441|16468|18140|21969|26914|50708|50709|51869|53893|56702|73139|243529|625249	Dnmt1|Dnmt3a|Dnmt3b|H1f0|Hells|Hmgn1|Hmga2|Hp1bp3|Jarid2|Uhrf1|Top1|Macroh2a1|H1f2|H1f4|Rif1|Nudt5|H1f5|Cenpv|H1f10|Gpx4	-5.7
D16	GO Biological Processes	19	GO:0006418	tRNA aminoacylation for protein translation	19_GO:0008152 metabolic process	-6.8	17	10	20504	40	215	7	3.3	1.2	70223|104458|105148|107045|110960|216443|353172	Nars|Rars|Iars|Lars|Tars|Mars1|Gars	-5.6
D16	Reactome Gene Sets	6	R-MMU-156827	L13a-mediated translational silencing of Ceruloplasmin expression		-6.7	8.9	8.4	20504	107	215	10	4.7	1.4	13669|16341|20044|20085|27979|55944|56347|208643|223691|267019	Eif3a|Eif3e|Rps14|Rps19|Eif3b|Eif3d|Eif3c|Eif4g1|Eif3l|Rps15a	-5.6
D16	GO Biological Processes	19	GO:0016071	mRNA metabolic process	19_GO:0008152 metabolic process	-6.7	3.4	6.5	20504	675	215	24	11	2.1	11991|14265|15387|16341|17454|19205|20218|28114|50926|52502|53379|53610|56195|59013|66055|67755|68278|68879|71514|72692|74326|74351|230257|268697	Hnrnpd|Fmr1|Hnrnpk|Eif3e|Mov10|Ptbp1|Khdrbs1|Nsun2|Hnrnpdl|Carhsp1|Hnrnpa2b1|Nono|Ptbp2|Hnrnph1|Sf3b6|Ddx47|Ddx39a|Prpf6|Sfpq|Hnrnpll|Hnrnpr|Ddx23|Ptbp3|Ccnb1	-5.6
D16	GO Molecular Functions	21	GO:0004812	aminoacyl-tRNA ligase activity		-6.7	16	10	20504	41	215	7	3.3	1.2	70223|104458|105148|107045|110960|216443|353172	Nars|Rars|Iars|Lars|Tars|Mars1|Gars	-5.6
D16	GO Molecular Functions	21	GO:0016875	ligase activity, forming carbon-oxygen bonds		-6.7	16	10	20504	41	215	7	3.3	1.2	70223|104458|105148|107045|110960|216443|353172	Nars|Rars|Iars|Lars|Tars|Mars1|Gars	-5.6
D16	GO Molecular Functions	21	GO:0043021	ribonucleoprotein complex binding		-6.7	6.8	7.8	20504	168	215	12	5.6	1.6	14265|14828|15387|53421|56347|56449|67459|68879|70769|72322|224742|229317	Fmr1|Hspa5|Hnrnpk|Sec61a1|Eif3c|Ybx3|Nvl|Prpf6|Nolc1|Xpo5|Abcf1|Eif2a	-5.6
D16	GO Biological Processes	19	GO:0043039	tRNA aminoacylation	19_GO:0008152 metabolic process	-6.5	16	9.8	20504	43	215	7	3.3	1.2	70223|104458|105148|107045|110960|216443|353172	Nars|Rars|Iars|Lars|Tars|Mars1|Gars	-5.4
D16	GO Biological Processes	19	GO:0006403	RNA localization	19_GO:0051179 localization	-6.5	6.6	7.6	20504	174	215	12	5.6	1.6	12464|14265|20218|23881|28114|53319|53379|68278|68879|72322|103573|140488	Cct4|Fmr1|Khdrbs1|G3bp2|Nsun2|Nxf1|Hnrnpa2b1|Ddx39a|Prpf6|Xpo5|Xpo1|Igf2bp3	-5.4
D16	GO Biological Processes	19	GO:0016584	nucleosome positioning	19_GO:0009987 cellular process	-6.5	32	12	20504	15	215	5	2.3	1	14958|50708|50709|56702|243529	H1f0|H1f2|H1f4|H1f5|H1f10	-5.4
D16	GO Biological Processes	19	GO:0001101	response to acid chemical	19_GO:0050896 response to stimulus	-6.5	5.9	7.4	20504	209	215	13	6	1.6	12306|12825|12826|12832|12833|12842|12843|13433|13435|13436|16691|70572|107045	Anxa2|Col3a1|Col4a1|Col5a2|Col6a1|Col1a1|Col1a2|Dnmt1|Dnmt3a|Dnmt3b|Krt8|Ipo5|Lars	-5.4
D16	GO Biological Processes	19	GO:0043038	amino acid activation	19_GO:0008152 metabolic process	-6.5	15	9.7	20504	44	215	7	3.3	1.2	70223|104458|105148|107045|110960|216443|353172	Nars|Rars|Iars|Lars|Tars|Mars1|Gars	-5.4
D16	GO Molecular Functions	21	GO:0140142	nucleocytoplasmic carrier activity		-6.4	20	11	20504	28	215	6	2.8	1.1	16647|70572|72322|76582|103573|110750	Kpna2|Ipo5|Xpo5|Ipo11|Xpo1|Cse1l	-5.3
D16	GO Biological Processes	19	GO:0018126	protein hydroxylation	19_GO:0008152 metabolic process	-6.4	20	11	20504	28	215	6	2.8	1.1	18451|18452|18453|18822|26432|26433	P4ha1|P4ha2|P4hb|Plod1|Plod2|Plod3	-5.3
D16	GO Biological Processes	19	GO:1902416	positive regulation of mRNA binding	19_GO:0065007 biological regulation	-6.4	54	15	20504	7	215	4	1.9	0.92	14265|16341|55944|208643	Fmr1|Eif3e|Eif3d|Eif4g1	-5.3
D16	KEGG Pathway	24	ko03008	Ribosome biogenesis in eukaryotes		-6.4	8.2	8	20504	116	215	10	4.7	1.4	30877|53319|67459|69237|72515|72554|74778|100019|103573|217995	Gnl3|Nxf1|Nvl|Gtpbp4|Wdr43|Utp14a|Rrp7a|Mdn1|Xpo1|Heatr1	-5.3
D16	GO Molecular Functions	21	GO:0008135	translation factor activity, RNA binding		-6.4	9.5	8.4	20504	90	215	9	4.2	1.4	13669|16341|27979|55944|56347|208643|223691|226982|229317	Eif3a|Eif3e|Eif3b|Eif3d|Eif3c|Eif4g1|Eif3l|Eif5b|Eif2a	-5.3
D16	GO Molecular Functions	21	GO:0140104	molecular carrier activity		-6.3	11	8.7	20504	68	215	8	3.7	1.3	12759|16647|57320|70572|72322|76582|103573|110750	Clu|Kpna2|Park7|Ipo5|Xpo5|Ipo11|Xpo1|Cse1l	-5.2
D16	GO Molecular Functions	21	GO:0004386	helicase activity		-6.2	6.9	7.6	20504	151	215	11	5.1	1.5	15201|16952|17215|17219|17454|67755|68278|69663|71990|74351|234374	Hells|Anxa1|Mcm3|Mcm6|Mov10|Ddx47|Ddx39a|Ddx51|Ddx54|Ddx23|Ddx49	-5.2
D16	GO Biological Processes	19	GO:0033044	regulation of chromosome organization	19_GO:0050789 regulation of biological process	-6.2	6.2	7.3	20504	185	215	12	5.6	1.6	11991|12464|13433|18817|21973|26914|30877|53379|71514|73139|235661|268697	Hnrnpd|Cct4|Dnmt1|Plk1|Top2a|Macroh2a1|Gnl3|Hnrnpa2b1|Sfpq|Cenpv|Dync1li1|Ccnb1	-5.2
D16	GO Biological Processes	19	GO:0019081	viral translation	19_GO:0016032 viral process	-6.2	28	11	20504	17	215	5	2.3	1	13669|19205|27979|55944|223691	Eif3a|Ptbp1|Eif3b|Eif3d|Eif3l	-5.1
D16	GO Biological Processes	19	GO:0071229	cellular response to acid chemical	19_GO:0050896 response to stimulus	-6.2	6.1	7.2	20504	187	215	12	5.6	1.6	12306|12825|12826|12832|12833|12842|12843|13433|13435|13436|70572|107045	Anxa2|Col3a1|Col4a1|Col5a2|Col6a1|Col1a1|Col1a2|Dnmt1|Dnmt3a|Dnmt3b|Ipo5|Lars	-5.1
D16	GO Biological Processes	19	GO:1905216	positive regulation of RNA binding	19_GO:0065007 biological regulation	-6.1	48	14	20504	8	215	4	1.9	0.92	14265|16341|55944|208643	Fmr1|Eif3e|Eif3d|Eif4g1	-5.1
D16	Reactome Gene Sets	6	R-MMU-72689	Formation of a pool of free 40S subunits		-6.1	8.8	8	20504	97	215	9	4.2	1.4	13669|16341|20044|20085|27979|55944|56347|223691|267019	Eif3a|Eif3e|Rps14|Rps19|Eif3b|Eif3d|Eif3c|Eif3l|Rps15a	-5
D16	GO Molecular Functions	21	GO:0031490	chromatin DNA binding		-6.1	8.8	8	20504	97	215	9	4.2	1.4	14958|15312|15364|21969|26914|50708|50709|56702|243529	H1f0|Hmgn1|Hmga2|Top1|Macroh2a1|H1f2|H1f4|H1f5|H1f10	-5
D16	WikiPathways	27	WP157	Glycolysis and gluconeogenesis		-6	13	8.9	20504	51	215	7	3.3	1.2	14433|15277|16828|18641|18746|20525|68263	Gapdh|Hk2|Ldha|Pfkl|Pkm|Slc2a1|Pdhb	-5
D16	GO Biological Processes	19	GO:0045814	negative regulation of gene expression, epigenetic	19_GO:0048519 negative regulation of biological process	-5.9	13	8.8	20504	52	215	7	3.3	1.2	13433|13435|13436|15201|15364|26914|51869	Dnmt1|Dnmt3a|Dnmt3b|Hells|Hmga2|Macroh2a1|Rif1	-4.9
D16	CORUM	33	CORUM:973	Sec61alpha-CollagenIV-Hsp47 complex		-5.9	95	17	20504	3	215	3	1.4	0.8	12406|12826|53421	Serpinh1|Col4a1|Sec61a1	-4.9
D16	GO Molecular Functions	21	GO:0003886	DNA (cytosine-5-)-methyltransferase activity		-5.9	95	17	20504	3	215	3	1.4	0.8	13433|13435|13436	Dnmt1|Dnmt3a|Dnmt3b	-4.9
D16	GO Molecular Functions	21	GO:0008475	procollagen-lysine 5-dioxygenase activity		-5.9	95	17	20504	3	215	3	1.4	0.8	18822|26432|26433	Plod1|Plod2|Plod3	-4.9
D16	GO Biological Processes	19	GO:0008380	RNA splicing	19_GO:0008152 metabolic process	-5.9	4.1	6.4	20504	399	215	17	7.9	1.8	14265|15387|19205|20218|53379|53610|56195|59013|66055|67755|68278|68879|71514|72692|74351|230257|432467	Fmr1|Hnrnpk|Ptbp1|Khdrbs1|Hnrnpa2b1|Nono|Ptbp2|Hnrnph1|Sf3b6|Ddx47|Ddx39a|Prpf6|Sfpq|Hnrnpll|Ddx23|Ptbp3|Hnrnph3	-4.9
D16	GO Molecular Functions	21	GO:0031418	L-ascorbic acid binding		-5.9	25	11	20504	19	215	5	2.3	1	18451|18452|18822|26432|26433	P4ha1|P4ha2|Plod1|Plod2|Plod3	-4.9
D16	Reactome Gene Sets	6	R-MMU-186797	Signaling by PDGF		-5.9	13	8.7	20504	53	215	7	3.3	1.2	12825|12826|12827|12831|12832|12833|12834	Col3a1|Col4a1|Col4a2|Col5a1|Col5a2|Col6a1|Col6a2	-4.9
D16	GO Molecular Functions	21	GO:0016874	ligase activity		-5.9	6.4	7.1	20504	164	215	11	5.1	1.5	16881|27053|51797|69719|70223|104458|105148|107045|110960|216443|353172	Lig1|Asns|Ctps|Cad|Nars|Rars|Iars|Lars|Tars|Mars1|Gars	-4.9
D16	GO Biological Processes	19	GO:0034504	protein localization to nucleus	19_GO:0051179 localization	-5.9	4.5	6.5	20504	317	215	15	7	1.7	12317|12534|12842|16647|18817|22042|57320|67459|70572|70769|76582|77053|103573|110750|223697	Calr|Cdk1|Col1a1|Kpna2|Plk1|Tfrc|Park7|Nvl|Ipo5|Nolc1|Ipo11|Sun1|Xpo1|Cse1l|Sun2	-4.8
D16	GO Biological Processes	19	GO:0043045	DNA methylation involved in embryo development	19_GO:0032502 developmental process	-5.8	42	13	20504	9	215	4	1.9	0.92	13433|13435|13436|22715	Dnmt1|Dnmt3a|Dnmt3b|Zfp57	-4.8
D16	GO Biological Processes	19	GO:1901538	changes to DNA methylation involved in embryo development	19_GO:0032502 developmental process	-5.8	42	13	20504	9	215	4	1.9	0.92	13433|13435|13436|22715	Dnmt1|Dnmt3a|Dnmt3b|Zfp57	-4.8
D16	GO Biological Processes	19	GO:0031497	chromatin assembly	19_GO:0009987 cellular process	-5.8	8.3	7.6	20504	104	215	9	4.2	1.4	14958|15201|15441|26914|50708|50709|56702|73139|243529	H1f0|Hells|Hp1bp3|Macroh2a1|H1f2|H1f4|H1f5|Cenpv|H1f10	-4.8
D16	KEGG Pathway	24	ko03013	RNA transport		-5.8	6.3	7.1	20504	167	215	11	5.1	1.5	13669|14265|16341|27979|53319|55944|56347|72322|103573|208643|226982	Eif3a|Fmr1|Eif3e|Eif3b|Nxf1|Eif3d|Eif3c|Xpo5|Xpo1|Eif4g1|Eif5b	-4.8
D16	KEGG Pathway	24	mmu03013	RNA transport		-5.8	6.2	7	20504	168	215	11	5.1	1.5	13669|14265|16341|27979|53319|55944|56347|72322|103573|208643|226982	Eif3a|Fmr1|Eif3e|Eif3b|Nxf1|Eif3d|Eif3c|Xpo5|Xpo1|Eif4g1|Eif5b	-4.8
D16	GO Biological Processes	19	GO:0016458	gene silencing	19_GO:0048519 negative regulation of biological process	-5.7	5.1	6.6	20504	243	215	13	6	1.6	13433|13435|13436|14265|14958|15201|15364|17454|51869|53379|72322|208643|227695	Dnmt1|Dnmt3a|Dnmt3b|Fmr1|H1f0|Hells|Hmga2|Mov10|Rif1|Hnrnpa2b1|Xpo5|Eif4g1|Spout1	-4.7
D16	GO Biological Processes	19	GO:0051169	nuclear transport	19_GO:0051179 localization	-5.7	4.4	6.3	20504	327	215	15	7	1.7	12317|12534|16647|20218|28114|53319|53379|57320|68278|70572|70769|72322|76582|103573|110750	Calr|Cdk1|Kpna2|Khdrbs1|Nsun2|Nxf1|Hnrnpa2b1|Park7|Ddx39a|Ipo5|Nolc1|Xpo5|Ipo11|Xpo1|Cse1l	-4.7
D16	GO Biological Processes	19	GO:0006913	nucleocytoplasmic transport	19_GO:0051179 localization	-5.7	4.4	6.3	20504	327	215	15	7	1.7	12317|12534|16647|20218|28114|53319|53379|57320|68278|70572|70769|72322|76582|103573|110750	Calr|Cdk1|Kpna2|Khdrbs1|Nsun2|Nxf1|Hnrnpa2b1|Park7|Ddx39a|Ipo5|Nolc1|Xpo5|Ipo11|Xpo1|Cse1l	-4.7
D16	GO Biological Processes	19	GO:0006338	chromatin remodeling	19_GO:0009987 cellular process	-5.7	5.5	6.7	20504	208	215	12	5.6	1.6	14958|15201|15441|16468|21969|26914|50708|50709|53893|56702|73139|243529	H1f0|Hells|Hp1bp3|Jarid2|Top1|Macroh2a1|H1f2|H1f4|Nudt5|H1f5|Cenpv|H1f10	-4.7
D16	GO Molecular Functions	21	GO:0140098	catalytic activity, acting on RNA		-5.7	4.1	6.2	20504	373	215	16	7.4	1.8	17454|28114|67755|68278|69663|70223|71990|72662|74351|104458|105148|107045|110960|216443|234374|353172	Mov10|Nsun2|Ddx47|Ddx39a|Ddx51|Nars|Ddx54|Dis3|Ddx23|Rars|Iars|Lars|Tars|Mars1|Ddx49|Gars	-4.7
D16	GO Biological Processes	19	GO:0071230	cellular response to amino acid stimulus	19_GO:0050896 response to stimulus	-5.7	6.1	6.9	20504	173	215	11	5.1	1.5	12825|12826|12832|12833|12842|12843|13433|13435|13436|70572|107045	Col3a1|Col4a1|Col5a2|Col6a1|Col1a1|Col1a2|Dnmt1|Dnmt3a|Dnmt3b|Ipo5|Lars	-4.7
D16	GO Biological Processes	19	GO:1902415	regulation of mRNA binding	19_GO:0065007 biological regulation	-5.6	38	12	20504	10	215	4	1.9	0.92	14265|16341|55944|208643	Fmr1|Eif3e|Eif3d|Eif4g1	-4.6
D16	GO Biological Processes	19	GO:2001242	regulation of intrinsic apoptotic signaling pathway	19_GO:0023052 signaling	-5.6	6	6.8	20504	176	215	11	5.1	1.5	12759|15201|15387|18453|53610|56428|56449|57320|68015|71514|74006	Clu|Hells|Hnrnpk|P4hb|Nono|Mtch2|Ybx3|Park7|Trap1|Sfpq|Dnm1l	-4.6
D16	GO Biological Processes	19	GO:0050658	RNA transport	19_GO:0051179 localization	-5.4	6.5	6.9	20504	147	215	10	4.7	1.4	14265|20218|23881|28114|53319|53379|68278|72322|103573|140488	Fmr1|Khdrbs1|G3bp2|Nsun2|Nxf1|Hnrnpa2b1|Ddx39a|Xpo5|Xpo1|Igf2bp3	-4.5
D16	GO Biological Processes	19	GO:0050657	nucleic acid transport	19_GO:0051179 localization	-5.4	6.5	6.9	20504	147	215	10	4.7	1.4	14265|20218|23881|28114|53319|53379|68278|72322|103573|140488	Fmr1|Khdrbs1|G3bp2|Nsun2|Nxf1|Hnrnpa2b1|Ddx39a|Xpo5|Xpo1|Igf2bp3	-4.5
D16	KEGG Pathway	24	mmu_M00035	Methionine degradation		-5.4	35	12	20504	11	215	4	1.9	0.92	13433|13435|13436|232087	Dnmt1|Dnmt3a|Dnmt3b|Mat2a	-4.5
D16	KEGG Pathway	24	M00035	Methionine degradation		-5.4	35	12	20504	11	215	4	1.9	0.92	13433|13435|13436|232087	Dnmt1|Dnmt3a|Dnmt3b|Mat2a	-4.5
D16	GO Biological Processes	19	GO:0046034	ATP metabolic process	19_GO:0008152 metabolic process	-5.4	4.8	6.3	20504	259	215	13	6	1.6	12534|14433|15277|16828|18641|18746|53893|56428|57320|66592|74006|108037|268697	Cdk1|Gapdh|Hk2|Ldha|Pfkl|Pkm|Nudt5|Mtch2|Park7|Stoml2|Dnm1l|Shmt2|Ccnb1	-4.5
D16	GO Molecular Functions	21	GO:0016706	2-oxoglutarate-dependent dioxygenase activity		-5.4	11	7.9	20504	62	215	7	3.3	1.2	16468|18451|18452|18453|18822|26432|26433	Jarid2|P4ha1|P4ha2|P4hb|Plod1|Plod2|Plod3	-4.5
D16	GO Biological Processes	19	GO:0006310	DNA recombination	19_GO:0008152 metabolic process	-5.4	4.4	6.2	20504	301	215	14	6.5	1.7	14958|16881|17215|17219|21973|22042|50708|50709|51869|53610|56702|68275|71514|243529	H1f0|Lig1|Mcm3|Mcm6|Top2a|Tfrc|H1f2|H1f4|Rif1|Nono|H1f5|Rpa1|Sfpq|H1f10	-4.5
D16	GO Biological Processes	19	GO:0051236	establishment of RNA localization	19_GO:0051179 localization	-5.4	6.4	6.8	20504	150	215	10	4.7	1.4	14265|20218|23881|28114|53319|53379|68278|72322|103573|140488	Fmr1|Khdrbs1|G3bp2|Nsun2|Nxf1|Hnrnpa2b1|Ddx39a|Xpo5|Xpo1|Igf2bp3	-4.4
D16	WikiPathways	27	WP85	Focal adhesion		-5.4	5.7	6.6	20504	185	215	11	5.1	1.5	12814|12825|12826|12827|12831|12832|12834|12842|12843|14268|226519	Col11a1|Col3a1|Col4a1|Col4a2|Col5a1|Col5a2|Col6a2|Col1a1|Col1a2|Fn1|Lamc1	-4.4
D16	GO Molecular Functions	21	GO:0140097	catalytic activity, acting on DNA		-5.4	5.1	6.4	20504	223	215	12	5.6	1.6	13433|13435|13436|15201|15364|16881|16952|17215|17219|19205|21969|21973	Dnmt1|Dnmt3a|Dnmt3b|Hells|Hmga2|Lig1|Anxa1|Mcm3|Mcm6|Ptbp1|Top1|Top2a	-4.4
D16	CORUM	33	CORUM:5142	DCS complex (Ptbp1, Ptbp2, Hnrph1, Hnrpf)		-5.3	72	15	20504	4	215	3	1.4	0.8	19205|56195|59013	Ptbp1|Ptbp2|Hnrnph1	-4.4
D16	GO Molecular Functions	21	GO:0009008	DNA-methyltransferase activity		-5.3	72	15	20504	4	215	3	1.4	0.8	13433|13435|13436	Dnmt1|Dnmt3a|Dnmt3b	-4.4
D16	GO Molecular Functions	21	GO:0070815	peptidyl-lysine 5-dioxygenase activity		-5.3	72	15	20504	4	215	3	1.4	0.8	18822|26432|26433	Plod1|Plod2|Plod3	-4.4
D16	GO Biological Processes	19	GO:0043200	response to amino acid	19_GO:0050896 response to stimulus	-5.3	5.6	6.5	20504	187	215	11	5.1	1.5	12825|12826|12832|12833|12842|12843|13433|13435|13436|70572|107045	Col3a1|Col4a1|Col5a2|Col6a1|Col1a1|Col1a2|Dnmt1|Dnmt3a|Dnmt3b|Ipo5|Lars	-4.4
D16	Reactome Gene Sets	6	R-MMU-3000157	Laminin interactions		-5.3	19	9.3	20504	25	215	5	2.3	1	12822|12826|12827|15530|18074	Col18a1|Col4a1|Col4a2|Hspg2|Nid2	-4.3
D16	GO Biological Processes	19	GO:0075522	IRES-dependent viral translational initiation	19_GO:0016032 viral process	-5.3	32	11	20504	12	215	4	1.9	0.92	13669|19205|27979|55944	Eif3a|Ptbp1|Eif3b|Eif3d	-4.3
D16	GO Biological Processes	19	GO:0051168	nuclear export	19_GO:0051179 localization	-5.2	6.2	6.6	20504	155	215	10	4.7	1.4	12317|20218|28114|53319|53379|57320|68278|72322|103573|110750	Calr|Khdrbs1|Nsun2|Nxf1|Hnrnpa2b1|Park7|Ddx39a|Xpo5|Xpo1|Cse1l	-4.3
D16	KEGG Pathway	24	ko00970	Aminoacyl-tRNA biosynthesis		-5.2	10	7.6	20504	66	215	7	3.3	1.2	70223|104458|105148|107045|110960|216443|353172	Nars|Rars|Iars|Lars|Tars|Mars1|Gars	-4.3
D16	GO Biological Processes	19	GO:0040029	regulation of gene expression, epigenetic	19_GO:0008152 metabolic process	-5.2	7	6.8	20504	123	215	9	4.2	1.4	13433|13435|13436|15201|15364|16468|22715|26914|51869	Dnmt1|Dnmt3a|Dnmt3b|Hells|Hmga2|Jarid2|Zfp57|Macroh2a1|Rif1	-4.3
D16	GO Biological Processes	19	GO:0031507	heterochromatin assembly	19_GO:0048519 negative regulation of biological process	-5.2	13	8.2	20504	44	215	6	2.8	1.1	13433|13435|13436|15201|15364|51869	Dnmt1|Dnmt3a|Dnmt3b|Hells|Hmga2|Rif1	-4.3
D16	GO Biological Processes	19	GO:0032392	DNA geometric change	19_GO:0009987 cellular process	-5.2	13	8.2	20504	44	215	6	2.8	1.1	16952|17215|17219|21973|53379|68275	Anxa1|Mcm3|Mcm6|Top2a|Hnrnpa2b1|Rpa1	-4.3
D16	KEGG Pathway	24	mmu00970	Aminoacyl-tRNA biosynthesis		-5.2	10	7.6	20504	67	215	7	3.3	1.2	70223|104458|105148|107045|110960|216443|353172	Nars|Rars|Iars|Lars|Tars|Mars1|Gars	-4.2
D16	WikiPathways	27	WP3855	Dysregulated miRNA targeting in insulin/PI3K-AKT signaling		-5.2	18	9.1	20504	26	215	5	2.3	1	12825|12827|12842|12843|14104	Col3a1|Col4a2|Col1a1|Col1a2|Fasn	-4.2
D16	GO Biological Processes	19	GO:0043484	regulation of RNA splicing	19_GO:0008152 metabolic process	-5.2	6	6.5	20504	158	215	10	4.7	1.4	14265|15387|19205|20218|53379|56195|59013|72692|230257|432467	Fmr1|Hnrnpk|Ptbp1|Khdrbs1|Hnrnpa2b1|Ptbp2|Hnrnph1|Hnrnpll|Ptbp3|Hnrnph3	-4.2
D16	GO Biological Processes	19	GO:0034250	positive regulation of cellular amide metabolic process	19_GO:0048518 positive regulation of biological process	-5.1	6	6.5	20504	159	215	10	4.7	1.4	11991|12759|12785|14265|16341|18746|20218|55944|208643|224742	Hnrnpd|Clu|Cnbp|Fmr1|Eif3e|Pkm|Khdrbs1|Eif3d|Eif4g1|Abcf1	-4.2
D16	GO Biological Processes	19	GO:0034502	protein localization to chromosome	19_GO:0051179 localization	-5.1	7.9	7	20504	96	215	8	3.7	1.3	12464|12534|16468|18817|26914|30877|56702|68275	Cct4|Cdk1|Jarid2|Plk1|Macroh2a1|Gnl3|H1f5|Rpa1	-4.2
D16	Reactome Gene Sets	6	R-MMU-2214320	Anchoring fibril formation		-5.1	29	11	20504	13	215	4	1.9	0.92	12826|12827|12842|12843	Col4a1|Col4a2|Col1a1|Col1a2	-4.2
D16	GO Biological Processes	19	GO:1905214	regulation of RNA binding	19_GO:0065007 biological regulation	-5.1	29	11	20504	13	215	4	1.9	0.92	14265|16341|55944|208643	Fmr1|Eif3e|Eif3d|Eif4g1	-4.2
D16	GO Biological Processes	19	GO:0006333	chromatin assembly or disassembly	19_GO:0009987 cellular process	-5.1	6.8	6.7	20504	127	215	9	4.2	1.4	14958|15201|15441|26914|50708|50709|56702|73139|243529	H1f0|Hells|Hp1bp3|Macroh2a1|H1f2|H1f4|H1f5|Cenpv|H1f10	-4.2
D16	GO Biological Processes	19	GO:0008631	intrinsic apoptotic signaling pathway in response to oxidative stress	19_GO:0023052 signaling	-5.1	12	8	20504	46	215	6	2.8	1.1	17279|18453|53610|57320|68015|71514	Melk|P4hb|Nono|Park7|Trap1|Sfpq	-4.2
D16	GO Biological Processes	19	GO:0045910	negative regulation of DNA recombination	19_GO:0048519 negative regulation of biological process	-5	12	7.9	20504	47	215	6	2.8	1.1	14958|50708|50709|51869|56702|243529	H1f0|H1f2|H1f4|Rif1|H1f5|H1f10	-4.1
D16	GO Biological Processes	19	GO:0072594	establishment of protein localization to organelle	19_GO:0051179 localization	-5	3.7	5.6	20504	418	215	16	7.4	1.8	11776|12464|12534|12759|14828|15277|15525|16647|26914|53421|56428|56702|70572|70769|76582|110750	Ap3d1|Cct4|Cdk1|Clu|Hspa5|Hk2|Hspa4|Kpna2|Macroh2a1|Sec61a1|Mtch2|H1f5|Ipo5|Nolc1|Ipo11|Cse1l	-4.1
D16	GO Biological Processes	19	GO:1902175	regulation of oxidative stress-induced intrinsic apoptotic signaling pathway	19_GO:0023052 signaling	-5	17	8.7	20504	28	215	5	2.3	1	18453|53610|57320|68015|71514	P4hb|Nono|Park7|Trap1|Sfpq	-4.1
D16	GO Biological Processes	19	GO:0045727	positive regulation of translation	19_GO:0048518 positive regulation of biological process	-5	6.6	6.6	20504	131	215	9	4.2	1.4	11991|12785|14265|16341|18746|20218|55944|208643|224742	Hnrnpd|Cnbp|Fmr1|Eif3e|Pkm|Khdrbs1|Eif3d|Eif4g1|Abcf1	-4.1
D16	GO Biological Processes	19	GO:0006397	mRNA processing	19_GO:0008152 metabolic process	-5	3.4	5.5	20504	470	215	17	7.9	1.8	14265|15387|19205|20218|53379|53610|56195|59013|66055|67755|68278|68879|71514|72692|74351|230257|268697	Fmr1|Hnrnpk|Ptbp1|Khdrbs1|Hnrnpa2b1|Nono|Ptbp2|Hnrnph1|Sf3b6|Ddx47|Ddx39a|Prpf6|Sfpq|Hnrnpll|Ddx23|Ptbp3|Ccnb1	-4.1
D16	GO Biological Processes	19	GO:0042273	ribosomal large subunit biogenesis	19_GO:0009987 cellular process	-5	9.3	7.2	20504	72	215	7	3.3	1.2	64934|66229|67459|69237|76130|100019|107071	Pes1|Rpl7l1|Nvl|Gtpbp4|Las1l|Mdn1|Wdr74	-4.1
D16	GO Biological Processes	19	GO:0042274	ribosomal small subunit biogenesis	19_GO:0009987 cellular process	-5	9.3	7.2	20504	72	215	7	3.3	1.2	20044|20085|53414|74778|75416|217995|223499	Rps14|Rps19|Bysl|Rrp7a|Nop14|Heatr1|Dcaf13	-4.1
D16	GO Molecular Functions	21	GO:0004656	procollagen-proline 4-dioxygenase activity		-5	57	13	20504	5	215	3	1.4	0.8	18451|18452|18453	P4ha1|P4ha2|P4hb	-4
D16	Reactome Gene Sets	6	R-MMU-2980767	Activation of NIMA Kinases NEK9, NEK6, NEK7		-5	57	13	20504	5	215	3	1.4	0.8	12534|18817|268697	Cdk1|Plk1|Ccnb1	-4
D16	Reactome Gene Sets	6	R-MMU-6806834	Signaling by MET		-4.9	9.1	7.2	20504	73	215	7	3.3	1.2	12814|12825|12831|12832|12842|12843|14268	Col11a1|Col3a1|Col5a1|Col5a2|Col1a1|Col1a2|Fn1	-4
D16	GO Molecular Functions	21	GO:0003724	RNA helicase activity		-4.9	9.1	7.2	20504	73	215	7	3.3	1.2	17454|67755|68278|69663|71990|74351|234374	Mov10|Ddx47|Ddx39a|Ddx51|Ddx54|Ddx23|Ddx49	-4
D16	GO Biological Processes	19	GO:0033119	negative regulation of RNA splicing	19_GO:0048519 negative regulation of biological process	-4.9	16	8.6	20504	29	215	5	2.3	1	15387|19205|53379|56195|230257	Hnrnpk|Ptbp1|Hnrnpa2b1|Ptbp2|Ptbp3	-4
D16	GO Molecular Functions	21	GO:0048027	mRNA 5'-UTR binding		-4.9	16	8.6	20504	29	215	5	2.3	1	14265|20044|30877|108037|140488	Fmr1|Rps14|Gnl3|Shmt2|Igf2bp3	-4
D16	GO Biological Processes	19	GO:0051570	regulation of histone H3-K9 methylation	19_GO:0008152 metabolic process	-4.9	16	8.6	20504	29	215	5	2.3	1	13433|13436|16468|51869|56702	Dnmt1|Dnmt3b|Jarid2|Rif1|H1f5	-4
D16	GO Biological Processes	19	GO:0035987	endodermal cell differentiation	19_GO:0032502 developmental process	-4.9	16	8.6	20504	29	215	5	2.3	1	12831|12832|14268|15364|26914	Col5a1|Col5a2|Fn1|Hmga2|Macroh2a1	-4
D16	GO Biological Processes	19	GO:0030490	maturation of SSU-rRNA	19_GO:0008152 metabolic process	-4.9	12	7.7	20504	49	215	6	2.8	1.1	20044|20085|53414|75416|217995|223499	Rps14|Rps19|Bysl|Nop14|Heatr1|Dcaf13	-4
D16	WikiPathways	27	WP307	Translation factors		-4.9	12	7.7	20504	49	215	6	2.8	1.1	13669|16341|27979|55944|56347|208643	Eif3a|Eif3e|Eif3b|Eif3d|Eif3c|Eif4g1	-4
D16	GO Biological Processes	19	GO:0045185	maintenance of protein location	19_GO:0051179 localization	-4.9	7.4	6.7	20504	103	215	8	3.7	1.3	14118|14119|14828|15277|16859|57320|77053|223697	Fbn1|Fbn2|Hspa5|Hk2|Lgals9|Park7|Sun1|Sun2	-4
D16	GO Biological Processes	19	GO:0045787	positive regulation of cell cycle	19_GO:0048518 positive regulation of biological process	-4.9	4	5.7	20504	336	215	14	6.5	1.7	12317|12534|16952|18392|26914|26934|27053|71514|71819|73139|208643|235661|267019|268697	Calr|Cdk1|Anxa1|Orc1|Macroh2a1|Racgap1|Asns|Sfpq|Kif23|Cenpv|Eif4g1|Dync1li1|Rps15a|Ccnb1	-4
D16	GO Molecular Functions	21	GO:0008186	ATP-dependent activity, acting on RNA		-4.9	8.9	7.1	20504	75	215	7	3.3	1.2	17454|67755|68278|69663|71990|74351|234374	Mov10|Ddx47|Ddx39a|Ddx51|Ddx54|Ddx23|Ddx49	-4
D16	WikiPathways	27	WP458	Inflammatory response pathway		-4.9	16	8.4	20504	30	215	5	2.3	1	12825|12842|12843|14268|226519	Col3a1|Col1a1|Col1a2|Fn1|Lamc1	-4
D16	GO Biological Processes	19	GO:0051052	regulation of DNA metabolic process	19_GO:0008152 metabolic process	-4.8	3.7	5.5	20504	388	215	15	7	1.7	11991|12464|13433|13435|14958|15364|22042|30877|50708|50709|51869|53379|56702|67459|243529	Hnrnpd|Cct4|Dnmt1|Dnmt3a|H1f0|Hmga2|Tfrc|Gnl3|H1f2|H1f4|Rif1|Hnrnpa2b1|H1f5|Nvl|H1f10	-3.9
D16	GO Molecular Functions	21	GO:0003730	mRNA 3'-UTR binding		-4.8	7.2	6.6	20504	106	215	8	3.7	1.3	11991|14265|15387|52502|53379|56449|74326|140488	Hnrnpd|Fmr1|Hnrnpk|Carhsp1|Hnrnpa2b1|Ybx3|Hnrnpr|Igf2bp3	-3.9
D16	WikiPathways	27	WP730	Glutathione and one-carbon metabolism		-4.8	15	8.2	20504	31	215	5	2.3	1	13433|13435|13436|108037|625249	Dnmt1|Dnmt3a|Dnmt3b|Shmt2|Gpx4	-3.9
D16	Reactome Gene Sets	6	R-MMU-422475	Axon guidance		-4.8	4.5	5.8	20504	256	215	12	5.6	1.6	11773|12825|12826|12827|12831|12832|12833|12834|13138|14733|22145|22152	Ap2m1|Col3a1|Col4a1|Col4a2|Col5a1|Col5a2|Col6a1|Col6a2|Dag1|Gpc1|Tuba4a|Tubb3	-3.9
D16	Reactome Gene Sets	6	R-MMU-9675108	Nervous system development		-4.7	4.5	5.7	20504	257	215	12	5.6	1.6	11773|12825|12826|12827|12831|12832|12833|12834|13138|14733|22145|22152	Ap2m1|Col3a1|Col4a1|Col4a2|Col5a1|Col5a2|Col6a1|Col6a2|Dag1|Gpc1|Tuba4a|Tubb3	-3.9
D16	Reactome Gene Sets	6	R-MMU-2559584	Formation of Senescence-Associated Heterochromatin Foci (SAHF)		-4.7	24	9.4	20504	16	215	4	1.9	0.92	14958|15364|50708|56702	H1f0|Hmga2|H1f2|H1f5	-3.8
D16	Reactome Gene Sets	6	R-MMU-72766	Translation		-4.7	4.8	5.8	20504	220	215	11	5.1	1.5	13669|16341|20044|20085|27979|55944|56347|208643|223691|226982|267019	Eif3a|Eif3e|Rps14|Rps19|Eif3b|Eif3d|Eif3c|Eif4g1|Eif3l|Eif5b|Rps15a	-3.8
D16	Reactome Gene Sets	6	R-MMU-176417	Phosphorylation of Emi1		-4.7	48	12	20504	6	215	3	1.4	0.8	12534|18817|268697	Cdk1|Plk1|Ccnb1	-3.8
D16	GO Biological Processes	19	GO:1903224	regulation of endodermal cell differentiation	19_GO:0032502 developmental process	-4.7	48	12	20504	6	215	3	1.4	0.8	12831|12832|26914	Col5a1|Col5a2|Macroh2a1	-3.8
D16	GO Biological Processes	19	GO:0065004	protein-DNA complex assembly	19_GO:0009987 cellular process	-4.6	5.9	6.1	20504	145	215	9	4.2	1.4	14958|15201|15441|26914|50708|50709|56702|73139|218977	H1f0|Hells|Hp1bp3|Macroh2a1|H1f2|H1f4|H1f5|Cenpv|Dlgap5	-3.8
D16	GO Biological Processes	19	GO:2001233	regulation of apoptotic signaling pathway	19_GO:0023052 signaling	-4.6	3.6	5.3	20504	402	215	15	7	1.7	12759|14161|14678|15201|15387|18453|52538|53610|56428|56449|57320|68015|71514|74006|99571	Clu|Fga|Gnai2|Hells|Hnrnpk|P4hb|Acaa2|Nono|Mtch2|Ybx3|Park7|Trap1|Sfpq|Dnm1l|Fgg	-3.8
D16	GO Biological Processes	19	GO:2001252	positive regulation of chromosome organization	19_GO:0048518 positive regulation of biological process	-4.6	8.1	6.7	20504	82	215	7	3.3	1.2	11991|12464|13433|26914|30877|53379|71514	Hnrnpd|Cct4|Dnmt1|Macroh2a1|Gnl3|Hnrnpa2b1|Sfpq	-3.7
D16	Reactome Gene Sets	6	R-MMU-2243919	Crosslinking of collagen fibrils		-4.6	22	9.1	20504	17	215	4	1.9	0.92	12826|12827|12842|12843	Col4a1|Col4a2|Col1a1|Col1a2	-3.7
D16	GO Biological Processes	19	GO:1901607	alpha-amino acid biosynthetic process	19_GO:0008152 metabolic process	-4.5	10	7	20504	57	215	6	2.8	1.1	26432|26433|27053|57320|69719|108037	Plod2|Plod3|Asns|Park7|Cad|Shmt2	-3.7
D16	GO Molecular Functions	21	GO:0043177	organic acid binding		-4.5	5.7	6	20504	150	215	9	4.2	1.4	18451|18452|18822|26432|26433|69719|104458|108037|232087	P4ha1|P4ha2|Plod1|Plod2|Plod3|Cad|Rars|Shmt2|Mat2a	-3.7
D16	GO Biological Processes	19	GO:0000462	maturation of SSU-rRNA from tricistronic rRNA transcript (SSU-rRNA, 5.8S rRNA, LSU-rRNA)	19_GO:0008152 metabolic process	-4.5	14	7.7	20504	35	215	5	2.3	1	20044|20085|53414|217995|223499	Rps14|Rps19|Bysl|Heatr1|Dcaf13	-3.7
D16	GO Biological Processes	19	GO:0000819	sister chromatid segregation	19_GO:0009987 cellular process	-4.5	5.1	5.8	20504	188	215	10	4.7	1.4	18817|21973|26914|26934|54392|68298|71514|71819|235661|268697	Plk1|Top2a|Macroh2a1|Racgap1|Ncapg|Ncapd2|Sfpq|Kif23|Dync1li1|Ccnb1	-3.7
D16	GO Biological Processes	19	GO:0051028	mRNA transport	19_GO:0051179 localization	-4.5	6.5	6.2	20504	117	215	8	3.7	1.3	14265|23881|28114|53319|53379|68278|103573|140488	Fmr1|G3bp2|Nsun2|Nxf1|Hnrnpa2b1|Ddx39a|Xpo1|Igf2bp3	-3.6
D16	Reactome Gene Sets	6	R-MMU-76009	Platelet Aggregation (Plug Formation)		-4.5	13	7.6	20504	36	215	5	2.3	1	12842|12843|14161|14268|99571	Col1a1|Col1a2|Fga|Fn1|Fgg	-3.6
D16	GO Biological Processes	19	GO:0055086	nucleobase-containing small molecule metabolic process	19_GO:0008152 metabolic process	-4.4	3.1	5	20504	519	215	17	7.9	1.8	14104|14433|14584|15277|18641|18746|51797|52538|53893|56428|57320|66592|68263|69719|108037|269951|353172	Fasn|Gapdh|Gfpt2|Hk2|Pfkl|Pkm|Ctps|Acaa2|Nudt5|Mtch2|Park7|Stoml2|Pdhb|Cad|Shmt2|Idh2|Gars	-3.6
D16	GO Biological Processes	19	GO:0071824	protein-DNA complex subunit organization	19_GO:0009987 cellular process	-4.4	5	5.7	20504	192	215	10	4.7	1.4	14958|15201|15441|26914|50708|50709|56702|73139|218977|243529	H1f0|Hells|Hp1bp3|Macroh2a1|H1f2|H1f4|H1f5|Cenpv|Dlgap5|H1f10	-3.6
D16	GO Biological Processes	19	GO:0051099	positive regulation of binding	19_GO:0065007 biological regulation	-4.4	4.9	5.7	20504	193	215	10	4.7	1.4	12306|14265|14958|15525|16341|16859|55944|57320|67459|208643	Anxa2|Fmr1|H1f0|Hspa4|Eif3e|Lgals9|Eif3d|Park7|Nvl|Eif4g1	-3.6
D16	CORUM	33	CORUM:3145	Coatomer complex		-4.4	41	11	20504	7	215	3	1.4	0.8	12847|50797|59042	Copa|Copb2|Cope	-3.6
D16	GO Biological Processes	19	GO:0032776	DNA methylation on cytosine	19_GO:0008152 metabolic process	-4.4	41	11	20504	7	215	3	1.4	0.8	13433|13435|13436	Dnmt1|Dnmt3a|Dnmt3b	-3.6
D16	GO Molecular Functions	21	GO:0140101	catalytic activity, acting on a tRNA		-4.4	6.4	6.1	20504	120	215	8	3.7	1.3	28114|70223|104458|105148|107045|110960|216443|353172	Nsun2|Nars|Rars|Iars|Lars|Tars|Mars1|Gars	-3.6
D16	GO Molecular Functions	21	GO:0016462	pyrophosphatase activity		-4.4	3	5	20504	577	215	18	8.4	1.9	12464|14678|14828|15525|18392|22145|22152|27407|53893|67459|68015|69237|71819|74006|104303|224742|226982|353172	Cct4|Gnai2|Hspa5|Hspa4|Orc1|Tuba4a|Tubb3|Abcf2|Nudt5|Nvl|Trap1|Gtpbp4|Kif23|Dnm1l|Arl1|Abcf1|Eif5b|Gars	-3.6
D16	GO Biological Processes	19	GO:0032508	DNA duplex unwinding	19_GO:0009987 cellular process	-4.4	13	7.5	20504	37	215	5	2.3	1	16952|17215|17219|21973|68275	Anxa1|Mcm3|Mcm6|Top2a|Rpa1	-3.6
D16	GO Biological Processes	19	GO:0000377	RNA splicing, via transesterification reactions with bulged adenosine as nucleophile	19_GO:0008152 metabolic process	-4.4	4.1	5.4	20504	280	215	12	5.6	1.6	14265|15387|19205|20218|53379|56195|66055|68278|68879|71514|74351|230257	Fmr1|Hnrnpk|Ptbp1|Khdrbs1|Hnrnpa2b1|Ptbp2|Sf3b6|Ddx39a|Prpf6|Sfpq|Ddx23|Ptbp3	-3.5
D16	GO Biological Processes	19	GO:0000398	mRNA splicing, via spliceosome	19_GO:0008152 metabolic process	-4.4	4.1	5.4	20504	280	215	12	5.6	1.6	14265|15387|19205|20218|53379|56195|66055|68278|68879|71514|74351|230257	Fmr1|Hnrnpk|Ptbp1|Khdrbs1|Hnrnpa2b1|Ptbp2|Sf3b6|Ddx39a|Prpf6|Sfpq|Ddx23|Ptbp3	-3.5
D16	GO Biological Processes	19	GO:0000375	RNA splicing, via transesterification reactions	19_GO:0008152 metabolic process	-4.4	4.1	5.4	20504	280	215	12	5.6	1.6	14265|15387|19205|20218|53379|56195|66055|68278|68879|71514|74351|230257	Fmr1|Hnrnpk|Ptbp1|Khdrbs1|Hnrnpa2b1|Ptbp2|Sf3b6|Ddx39a|Prpf6|Sfpq|Ddx23|Ptbp3	-3.5
D16	GO Biological Processes	19	GO:0015931	nucleobase-containing compound transport	19_GO:0051179 localization	-4.4	4.9	5.6	20504	196	215	10	4.7	1.4	14265|20218|23881|28114|53319|53379|68278|72322|103573|140488	Fmr1|Khdrbs1|G3bp2|Nsun2|Nxf1|Hnrnpa2b1|Ddx39a|Xpo5|Xpo1|Igf2bp3	-3.5
D16	GO Molecular Functions	21	GO:0031369	translation initiation factor binding		-4.3	13	7.3	20504	38	215	5	2.3	1	14265|20085|27979|56347|208643	Fmr1|Rps19|Eif3b|Eif3c|Eif4g1	-3.5
D16	GO Molecular Functions	21	GO:0048029	monosaccharide binding		-4.3	7.3	6.2	20504	91	215	7	3.3	1.2	15277|18451|18452|18641|18822|26432|26433	Hk2|P4ha1|P4ha2|Pfkl|Plod1|Plod2|Plod3	-3.5
D16	Reactome Gene Sets	6	R-MMU-6811434	COPI-dependent Golgi-to-ER retrograde traffic		-4.3	7.3	6.2	20504	91	215	7	3.3	1.2	12847|22145|22152|26934|50797|59042|71819	Copa|Tuba4a|Tubb3|Racgap1|Copb2|Cope|Kif23	-3.5
D16	GO Molecular Functions	21	GO:0016818	hydrolase activity, acting on acid anhydrides, in phosphorus-containing anhydrides		-4.3	2.9	4.9	20504	586	215	18	8.4	1.9	12464|14678|14828|15525|18392|22145|22152|27407|53893|67459|68015|69237|71819|74006|104303|224742|226982|353172	Cct4|Gnai2|Hspa5|Hspa4|Orc1|Tuba4a|Tubb3|Abcf2|Nudt5|Nvl|Trap1|Gtpbp4|Kif23|Dnm1l|Arl1|Abcf1|Eif5b|Gars	-3.5
D16	GO Biological Processes	19	GO:0034968	histone lysine methylation	19_GO:0008152 metabolic process	-4.3	6.2	5.9	20504	124	215	8	3.7	1.3	13433|13436|16468|26914|50708|50709|51869|56702	Dnmt1|Dnmt3b|Jarid2|Macroh2a1|H1f2|H1f4|Rif1|H1f5	-3.5
D16	Reactome Gene Sets	6	R-MMU-8856688	Golgi-to-ER retrograde transport		-4.3	6.2	5.9	20504	124	215	8	3.7	1.3	12847|22145|22152|26934|50797|59042|71819|235661	Copa|Tuba4a|Tubb3|Racgap1|Copb2|Cope|Kif23|Dync1li1	-3.5
D16	GO Molecular Functions	21	GO:0016817	hydrolase activity, acting on acid anhydrides		-4.3	2.9	4.9	20504	587	215	18	8.4	1.9	12464|14678|14828|15525|18392|22145|22152|27407|53893|67459|68015|69237|71819|74006|104303|224742|226982|353172	Cct4|Gnai2|Hspa5|Hspa4|Orc1|Tuba4a|Tubb3|Abcf2|Nudt5|Nvl|Trap1|Gtpbp4|Kif23|Dnm1l|Arl1|Abcf1|Eif5b|Gars	-3.5
D16	GO Biological Processes	19	GO:0051567	histone H3-K9 methylation	19_GO:0008152 metabolic process	-4.3	12	7.2	20504	39	215	5	2.3	1	13433|13436|16468|51869|56702	Dnmt1|Dnmt3b|Jarid2|Rif1|H1f5	-3.5
D16	GO Biological Processes	19	GO:0001706	endoderm formation	19_GO:0032502 developmental process	-4.3	12	7.2	20504	39	215	5	2.3	1	12831|12832|14268|15364|26914	Col5a1|Col5a2|Fn1|Hmga2|Macroh2a1	-3.5
D16	GO Biological Processes	19	GO:0008652	cellular amino acid biosynthetic process	19_GO:0008152 metabolic process	-4.3	8.9	6.5	20504	64	215	6	2.8	1.1	26432|26433|27053|57320|69719|108037	Plod2|Plod3|Asns|Park7|Cad|Shmt2	-3.4
D16	KEGG Pathway	24	ko05230	Central carbon metabolism in cancer		-4.3	8.9	6.5	20504	64	215	6	2.8	1.1	15277|16828|18641|18746|20525|68263	Hk2|Ldha|Pfkl|Pkm|Slc2a1|Pdhb	-3.4
D16	GO Molecular Functions	21	GO:0051213	dioxygenase activity		-4.2	7.1	6.1	20504	94	215	7	3.3	1.2	16468|18451|18452|18453|18822|26432|26433	Jarid2|P4ha1|P4ha2|P4hb|Plod1|Plod2|Plod3	-3.4
D16	GO Biological Processes	19	GO:0006541	glutamine metabolic process	19_GO:0008152 metabolic process	-4.2	18	8.1	20504	21	215	4	1.9	0.92	14584|27053|51797|69719	Gfpt2|Asns|Ctps|Cad	-3.4
D16	GO Biological Processes	19	GO:0006346	DNA methylation-dependent heterochromatin assembly	19_GO:0048519 negative regulation of biological process	-4.2	18	8.1	20504	21	215	4	1.9	0.92	13433|13435|13436|15201	Dnmt1|Dnmt3a|Dnmt3b|Hells	-3.4
D16	CORUM	33	CORUM:3146	Coatomer-Arf1 complex		-4.2	36	10	20504	8	215	3	1.4	0.8	12847|50797|59042	Copa|Copb2|Cope	-3.4
D16	GO Molecular Functions	21	GO:0019798	procollagen-proline dioxygenase activity		-4.2	36	10	20504	8	215	3	1.4	0.8	18451|18452|18453	P4ha1|P4ha2|P4hb	-3.4
D16	GO Molecular Functions	21	GO:0031545	peptidyl-proline 4-dioxygenase activity		-4.2	36	10	20504	8	215	3	1.4	0.8	18451|18452|18453	P4ha1|P4ha2|P4hb	-3.4
D16	GO Biological Processes	19	GO:0007059	chromosome segregation	19_GO:0009987 cellular process	-4.2	3.7	5.1	20504	338	215	13	6	1.6	18817|21969|21973|26914|26934|54392|68298|71514|71819|77053|218977|235661|268697	Plk1|Top1|Top2a|Macroh2a1|Racgap1|Ncapg|Ncapd2|Sfpq|Kif23|Sun1|Dlgap5|Dync1li1|Ccnb1	-3.4
D16	WikiPathways	27	WP1763	PluriNetWork: mechanisms associated with pluripotency		-4.2	3.9	5.2	20504	292	215	12	5.6	1.6	13433|13435|13436|15201|16468|16647|18140|18451|19664|22715|51869|69719	Dnmt1|Dnmt3a|Dnmt3b|Hells|Jarid2|Kpna2|Uhrf1|P4ha1|Rbpj|Zfp57|Rif1|Cad	-3.4
D16	KEGG Pathway	24	ko00010	Glycolysis / Gluconeogenesis		-4.2	8.7	6.4	20504	66	215	6	2.8	1.1	14433|15277|16828|18641|18746|68263	Gapdh|Hk2|Ldha|Pfkl|Pkm|Pdhb	-3.4
D16	KEGG Pathway	24	mmu05230	Central carbon metabolism in cancer		-4.2	8.7	6.4	20504	66	215	6	2.8	1.1	15277|16828|18641|18746|20525|68263	Hk2|Ldha|Pfkl|Pkm|Slc2a1|Pdhb	-3.4
D16	GO Biological Processes	19	GO:0090068	positive regulation of cell cycle process	19_GO:0048518 positive regulation of biological process	-4.2	4.2	5.3	20504	249	215	11	5.1	1.5	12534|16952|18392|26914|26934|71514|71819|73139|208643|235661|268697	Cdk1|Anxa1|Orc1|Macroh2a1|Racgap1|Sfpq|Kif23|Cenpv|Eif4g1|Dync1li1|Ccnb1	-3.4
D16	WikiPathways	27	WP662	Amino acid metabolism		-4.2	7	6	20504	96	215	7	3.3	1.2	16828|18452|18746|27053|69719|104458|105148	Ldha|P4ha2|Pkm|Asns|Cad|Rars|Iars	-3.4
D16	Reactome Gene Sets	6	R-MMU-69278	Cell Cycle, Mitotic		-4.1	3.1	4.8	20504	496	215	16	7.4	1.8	12534|16881|17215|17219|18392|18817|22145|22152|54392|68275|68298|71819|103573|235661|268697|326619	Cdk1|Lig1|Mcm3|Mcm6|Orc1|Plk1|Tuba4a|Tubb3|Ncapg|Rpa1|Ncapd2|Kif23|Xpo1|Dync1li1|Ccnb1|H4c1	-3.3
D16	Reactome Gene Sets	6	R-MMU-69273	Cyclin A/B1/B2 associated events during G2/M transition		-4.1	17	7.9	20504	22	215	4	1.9	0.92	12534|18817|103573|268697	Cdk1|Plk1|Xpo1|Ccnb1	-3.3
D16	GO Biological Processes	19	GO:0072595	maintenance of protein localization in organelle	19_GO:0051179 localization	-4.1	11	6.9	20504	42	215	5	2.3	1	14828|15277|57320|77053|223697	Hspa5|Hk2|Park7|Sun1|Sun2	-3.3
D16	GO Biological Processes	19	GO:0051098	regulation of binding	19_GO:0065007 biological regulation	-4.1	3.4	4.9	20504	397	215	14	6.5	1.7	12306|14265|14958|15364|15387|15525|16341|16859|18817|55944|57320|67459|69237|208643	Anxa2|Fmr1|H1f0|Hmga2|Hnrnpk|Hspa4|Eif3e|Lgals9|Plk1|Eif3d|Park7|Nvl|Gtpbp4|Eif4g1	-3.3
D16	GO Molecular Functions	21	GO:0043022	ribosome binding		-4.1	8.3	6.2	20504	69	215	6	2.8	1.1	14265|14828|53421|56347|224742|229317	Fmr1|Hspa5|Sec61a1|Eif3c|Abcf1|Eif2a	-3.3
D16	GO Biological Processes	19	GO:0019080	viral gene expression	19_GO:0016032 viral process	-4.1	8.3	6.2	20504	69	215	6	2.8	1.1	13669|15364|19205|27979|55944|223691	Eif3a|Hmga2|Ptbp1|Eif3b|Eif3d|Eif3l	-3.3
D16	CORUM	33	CORUM:414	(ER)-localized multiprotein complex, in absence of Ig heavy chains		-4	32	9.5	20504	9	215	3	1.4	0.8	14828|18453|19035	Hspa5|P4hb|Ppib	-3.2
D16	GO Biological Processes	19	GO:0017185	peptidyl-lysine hydroxylation	19_GO:0008152 metabolic process	-4	32	9.5	20504	9	215	3	1.4	0.8	18822|26432|26433	Plod1|Plod2|Plod3	-3.2
D16	GO Biological Processes	19	GO:0072378	blood coagulation, fibrin clot formation	19_GO:0032501 multicellular organismal process	-4	32	9.5	20504	9	215	3	1.4	0.8	14161|14268|99571	Fga|Fn1|Fgg	-3.2
D16	GO Molecular Functions	21	GO:0000049	tRNA binding		-4	8.2	6.2	20504	70	215	6	2.8	1.1	28114|72322|104458|105148|216443|229317	Nsun2|Xpo5|Rars|Iars|Mars1|Eif2a	-3.2
D16	GO Biological Processes	19	GO:0031056	regulation of histone modification	19_GO:0008152 metabolic process	-4	4.9	5.4	20504	174	215	9	4.2	1.4	13433|13436|14265|16468|26914|51869|56702|57320|268697	Dnmt1|Dnmt3b|Fmr1|Jarid2|Macroh2a1|Rif1|H1f5|Park7|Ccnb1	-3.2
D16	GO Biological Processes	19	GO:0097193	intrinsic apoptotic signaling pathway	19_GO:0023052 signaling	-4	3.7	5	20504	307	215	12	5.6	1.6	12759|15201|15387|17279|18453|53610|56428|56449|57320|68015|71514|74006	Clu|Hells|Hnrnpk|Melk|P4hb|Nono|Mtch2|Ybx3|Park7|Trap1|Sfpq|Dnm1l	-3.2
D16	GO Biological Processes	19	GO:0051301	cell division	19_GO:0009987 cellular process	-4	2.8	4.6	20504	621	215	18	8.4	1.9	12534|14678|15201|15364|16881|17758|18817|21969|21973|26934|28114|30877|68298|71819|73139|227695|235661|268697	Cdk1|Gnai2|Hells|Hmga2|Lig1|Map4|Plk1|Top1|Top2a|Racgap1|Nsun2|Gnl3|Ncapd2|Kif23|Cenpv|Spout1|Dync1li1|Ccnb1	-3.2
D16	GO Biological Processes	19	GO:0048025	negative regulation of mRNA splicing, via spliceosome	19_GO:0048519 negative regulation of biological process	-4	16	7.5	20504	24	215	4	1.9	0.92	15387|19205|53379|230257	Hnrnpk|Ptbp1|Hnrnpa2b1|Ptbp3	-3.2
D16	GO Biological Processes	19	GO:0097190	apoptotic signaling pathway	19_GO:0023052 signaling	-4	2.8	4.6	20504	623	215	18	8.4	1.9	12759|14161|14678|15201|15387|16691|17279|18453|52538|53610|56428|56449|57320|67755|68015|71514|74006|99571	Clu|Fga|Gnai2|Hells|Hnrnpk|Krt8|Melk|P4hb|Acaa2|Nono|Mtch2|Ybx3|Park7|Ddx47|Trap1|Sfpq|Dnm1l|Fgg	-3.2
D16	Reactome Gene Sets	6	R-MMU-6811442	Intra-Golgi and retrograde Golgi-to-ER traffic		-4	4.8	5.3	20504	177	215	9	4.2	1.4	12847|22145|22152|26934|50797|59042|71819|104303|235661	Copa|Tuba4a|Tubb3|Racgap1|Copb2|Cope|Kif23|Arl1|Dync1li1	-3.2
D16	KEGG Pathway	24	mmu00010	Glycolysis / Gluconeogenesis		-4	7.9	6.1	20504	72	215	6	2.8	1.1	14433|15277|16828|18641|18746|68263	Gapdh|Hk2|Ldha|Pfkl|Pkm|Pdhb	-3.2
D16	GO Biological Processes	19	GO:0006753	nucleoside phosphate metabolic process	19_GO:0008152 metabolic process	-4	3.1	4.7	20504	460	215	15	7	1.7	14104|14433|15277|18641|18746|51797|52538|53893|56428|57320|66592|68263|69719|269951|353172	Fasn|Gapdh|Hk2|Pfkl|Pkm|Ctps|Acaa2|Nudt5|Mtch2|Park7|Stoml2|Pdhb|Cad|Idh2|Gars	-3.2
D16	GO Molecular Functions	21	GO:0005048	signal sequence binding		-3.9	10	6.5	20504	46	215	5	2.3	1	11773|16647|53421|70572|70769	Ap2m1|Kpna2|Sec61a1|Ipo5|Nolc1	-3.1
D16	GO Biological Processes	19	GO:0018022	peptidyl-lysine methylation	19_GO:0008152 metabolic process	-3.9	5.4	5.4	20504	141	215	8	3.7	1.3	13433|13436|16468|26914|50708|50709|51869|56702	Dnmt1|Dnmt3b|Jarid2|Macroh2a1|H1f2|H1f4|Rif1|H1f5	-3.1
D16	GO Biological Processes	19	GO:0016052	carbohydrate catabolic process	19_GO:0008152 metabolic process	-3.9	5.4	5.4	20504	141	215	8	3.7	1.3	14433|15277|16828|18641|18746|53893|56428|73744	Gapdh|Hk2|Ldha|Pfkl|Pkm|Nudt5|Mtch2|Man2c1	-3.1
D16	GO Biological Processes	19	GO:0043414	macromolecule methylation	19_GO:0008152 metabolic process	-3.9	3.6	4.9	20504	314	215	12	5.6	1.6	13433|13435|13436|15201|16468|22715|26914|28114|50708|50709|51869|56702	Dnmt1|Dnmt3a|Dnmt3b|Hells|Jarid2|Zfp57|Macroh2a1|Nsun2|H1f2|H1f4|Rif1|H1f5	-3.1
D16	GO Biological Processes	19	GO:0032259	methylation	19_GO:0008152 metabolic process	-3.9	3.4	4.8	20504	363	215	13	6	1.6	13433|13435|13436|15201|16468|22715|26914|28114|50708|50709|51869|56702|227695	Dnmt1|Dnmt3a|Dnmt3b|Hells|Jarid2|Zfp57|Macroh2a1|Nsun2|H1f2|H1f4|Rif1|H1f5|Spout1	-3.1
D16	KEGG Pathway	24	ko05146	Amoebiasis		-3.9	6.3	5.6	20504	106	215	7	3.3	1.2	12825|12826|12827|12842|12843|14268|226519	Col3a1|Col4a1|Col4a2|Col1a1|Col1a2|Fn1|Lamc1	-3.1
D16	CORUM	33	CORUM:413	(ER)-localized multiprotein complex, Ig heavy chains associated		-3.9	29	9	20504	10	215	3	1.4	0.8	14828|18453|19035	Hspa5|P4hb|Ppib	-3.1
D16	GO Molecular Functions	21	GO:0003680	minor groove of adenine-thymine-rich DNA binding		-3.9	29	9	20504	10	215	3	1.4	0.8	11991|14958|15364	Hnrnpd|H1f0|Hmga2	-3.1
D16	GO Molecular Functions	21	GO:0005049	nuclear export signal receptor activity		-3.9	29	9	20504	10	215	3	1.4	0.8	72322|103573|110750	Xpo5|Xpo1|Cse1l	-3.1
D16	GO Molecular Functions	21	GO:0017111	nucleoside-triphosphatase activity		-3.9	2.9	4.6	20504	523	215	16	7.4	1.8	12464|14678|14828|15525|18392|22145|22152|27407|67459|68015|69237|71819|74006|104303|224742|226982	Cct4|Gnai2|Hspa5|Hspa4|Orc1|Tuba4a|Tubb3|Abcf2|Nvl|Trap1|Gtpbp4|Kif23|Dnm1l|Arl1|Abcf1|Eif5b	-3.1
D16	KEGG Pathway	24	ko00270	Cysteine and methionine metabolism		-3.8	9.9	6.4	20504	48	215	5	2.3	1	13433|13435|13436|16828|232087	Dnmt1|Dnmt3a|Dnmt3b|Ldha|Mat2a	-3.1
D16	GO Biological Processes	19	GO:0031062	positive regulation of histone methylation	19_GO:0048518 positive regulation of biological process	-3.8	9.9	6.4	20504	48	215	5	2.3	1	13433|13436|16468|51869|56702	Dnmt1|Dnmt3b|Jarid2|Rif1|H1f5	-3.1
D16	KEGG Pathway	24	mmu05146	Amoebiasis		-3.8	6.2	5.6	20504	108	215	7	3.3	1.2	12825|12826|12827|12842|12843|14268|226519	Col3a1|Col4a1|Col4a2|Col1a1|Col1a2|Fn1|Lamc1	-3.1
D16	KEGG Pathway	24	mmu04066	HIF-1 signaling pathway		-3.8	6.2	5.6	20504	108	215	7	3.3	1.2	14433|15277|16828|18641|20525|22042|68263	Gapdh|Hk2|Ldha|Pfkl|Slc2a1|Tfrc|Pdhb	-3.1
D16	GO Biological Processes	19	GO:0031058	positive regulation of histone modification	19_GO:0048518 positive regulation of biological process	-3.8	6.2	5.6	20504	108	215	7	3.3	1.2	13433|13436|14265|16468|51869|56702|268697	Dnmt1|Dnmt3b|Fmr1|Jarid2|Rif1|H1f5|Ccnb1	-3.1
D16	GO Biological Processes	19	GO:0098813	nuclear chromosome segregation	19_GO:0009987 cellular process	-3.8	3.8	4.9	20504	273	215	11	5.1	1.5	18817|21973|26914|26934|54392|68298|71514|71819|77053|235661|268697	Plk1|Top2a|Macroh2a1|Racgap1|Ncapg|Ncapd2|Sfpq|Kif23|Sun1|Dync1li1|Ccnb1	-3
D16	Reactome Gene Sets	6	R-MMU-72203	Processing of Capped Intron-Containing Pre-mRNA		-3.8	4.2	5	20504	229	215	10	4.7	1.4	11991|15387|53319|53379|59013|66055|68278|68879|74326|74351	Hnrnpd|Hnrnpk|Nxf1|Hnrnpa2b1|Hnrnph1|Sf3b6|Ddx39a|Prpf6|Hnrnpr|Ddx23	-3
D16	WikiPathways	27	WP2841	Focal adhesion: PI3K-Akt-mTOR signaling pathway		-3.8	3.6	4.8	20504	322	215	12	5.6	1.6	12814|12825|12826|12827|12831|12832|12834|12842|12843|14268|20525|226519	Col11a1|Col3a1|Col4a1|Col4a2|Col5a1|Col5a2|Col6a2|Col1a1|Col1a2|Fn1|Slc2a1|Lamc1	-3
D16	GO Biological Processes	19	GO:0071417	cellular response to organonitrogen compound	19_GO:0050896 response to stimulus	-3.8	2.7	4.4	20504	646	215	18	8.4	1.9	11991|12825|12826|12832|12833|12842|12843|13433|13435|13436|14678|15387|18746|18759|21817|70572|107045|216443	Hnrnpd|Col3a1|Col4a1|Col5a2|Col6a1|Col1a1|Col1a2|Dnmt1|Dnmt3a|Dnmt3b|Gnai2|Hnrnpk|Pkm|Prkci|Tgm2|Ipo5|Lars|Mars1	-3
D16	KEGG Pathway	24	mmu01230	Biosynthesis of amino acids		-3.8	7.3	5.8	20504	78	215	6	2.8	1.1	14433|18641|18746|108037|232087|269951	Gapdh|Pfkl|Pkm|Shmt2|Mat2a|Idh2	-3
D16	KEGG Pathway	24	ko01230	Biosynthesis of amino acids		-3.8	7.3	5.8	20504	78	215	6	2.8	1.1	14433|18641|18746|108037|232087|269951	Gapdh|Pfkl|Pkm|Shmt2|Mat2a|Idh2	-3
D16	GO Biological Processes	19	GO:0140694	non-membrane-bounded organelle assembly	19_GO:0009987 cellular process	-3.8	3.3	4.7	20504	374	215	13	6	1.6	16691|18817|20044|20085|23881|26934|71819|74778|100019|218977|226562|229317|233871	Krt8|Plk1|Rps14|Rps19|G3bp2|Racgap1|Kif23|Rrp7a|Mdn1|Dlgap5|Prrc2c|Eif2a|Atxn2l	-3
D16	KEGG Pathway	24	M00001	Glycolysis (Embden-Meyerhof pathway), glucose => pyruvate		-3.8	14	7	20504	27	215	4	1.9	0.92	14433|15277|18641|18746	Gapdh|Hk2|Pfkl|Pkm	-3
D16	GO Biological Processes	19	GO:0031061	negative regulation of histone methylation	19_GO:0048519 negative regulation of biological process	-3.8	14	7	20504	27	215	4	1.9	0.92	13433|13436|16468|26914	Dnmt1|Dnmt3b|Jarid2|Macroh2a1	-3
D16	KEGG Pathway	24	mmu_M00001	Glycolysis (Embden-Meyerhof pathway), glucose => pyruvate		-3.8	14	7	20504	27	215	4	1.9	0.92	14433|15277|18641|18746	Gapdh|Hk2|Pfkl|Pkm	-3
D16	Reactome Gene Sets	6	R-MMU-68877	Mitotic Prometaphase		-3.8	4.6	5.1	20504	188	215	9	4.2	1.4	12534|18817|22145|22152|54392|68298|103573|235661|268697	Cdk1|Plk1|Tuba4a|Tubb3|Ncapg|Ncapd2|Xpo1|Dync1li1|Ccnb1	-3
D16	GO Biological Processes	19	GO:0061647	histone H3-K9 modification	19_GO:0008152 metabolic process	-3.8	9.5	6.2	20504	50	215	5	2.3	1	13433|13436|16468|51869|56702	Dnmt1|Dnmt3b|Jarid2|Rif1|H1f5	-3
D16	KEGG Pathway	24	mmu00270	Cysteine and methionine metabolism		-3.8	9.5	6.2	20504	50	215	5	2.3	1	13433|13435|13436|16828|232087	Dnmt1|Dnmt3a|Dnmt3b|Ldha|Mat2a	-3
D16	GO Biological Processes	19	GO:0018401	peptidyl-proline hydroxylation to 4-hydroxy-L-proline	19_GO:0008152 metabolic process	-3.8	26	8.5	20504	11	215	3	1.4	0.8	18451|18452|18453	P4ha1|P4ha2|P4hb	-3
D16	GO Biological Processes	19	GO:0018205	peptidyl-lysine modification	19_GO:0008152 metabolic process	-3.7	3.3	4.6	20504	376	215	13	6	1.6	13433|13436|16468|18822|26432|26433|26914|30877|50708|50709|51869|56702|57320	Dnmt1|Dnmt3b|Jarid2|Plod1|Plod2|Plod3|Macroh2a1|Gnl3|H1f2|H1f4|Rif1|H1f5|Park7	-3
D16	GO Biological Processes	19	GO:0000018	regulation of DNA recombination	19_GO:0008152 metabolic process	-3.7	6	5.4	20504	112	215	7	3.3	1.2	14958|22042|50708|50709|51869|56702|243529	H1f0|Tfrc|H1f2|H1f4|Rif1|H1f5|H1f10	-3
D16	GO Biological Processes	19	GO:0006091	generation of precursor metabolites and energy	19_GO:0008152 metabolic process	-3.7	3.1	4.6	20504	428	215	14	6.5	1.7	12534|14433|15277|16828|18641|18746|56428|57320|66592|68015|68263|108037|268697|269951	Cdk1|Gapdh|Hk2|Ldha|Pfkl|Pkm|Mtch2|Park7|Stoml2|Trap1|Pdhb|Shmt2|Ccnb1|Idh2	-3
D16	GO Biological Processes	19	GO:0006405	RNA export from nucleus	19_GO:0051179 localization	-3.7	7.2	5.7	20504	79	215	6	2.8	1.1	20218|28114|53319|53379|68278|72322	Khdrbs1|Nsun2|Nxf1|Hnrnpa2b1|Ddx39a|Xpo5	-3
D16	GO Biological Processes	19	GO:0009185	ribonucleoside diphosphate metabolic process	19_GO:0008152 metabolic process	-3.7	5.9	5.4	20504	113	215	7	3.3	1.2	14433|15277|18641|18746|53893|56428|69719	Gapdh|Hk2|Pfkl|Pkm|Nudt5|Mtch2|Cad	-3
D16	GO Molecular Functions	21	GO:0019838	growth factor binding		-3.7	5.1	5.1	20504	151	215	8	3.7	1.3	12825|12826|12831|12833|12842|12843|14733|20085	Col3a1|Col4a1|Col5a1|Col6a1|Col1a1|Col1a2|Gpc1|Rps19	-3
D16	GO Biological Processes	19	GO:1901699	cellular response to nitrogen compound	19_GO:0050896 response to stimulus	-3.7	2.5	4.3	20504	717	215	19	8.8	1.9	11991|12825|12826|12832|12833|12842|12843|13433|13435|13436|14265|14678|15387|18746|18759|21817|70572|107045|216443	Hnrnpd|Col3a1|Col4a1|Col5a2|Col6a1|Col1a1|Col1a2|Dnmt1|Dnmt3a|Dnmt3b|Fmr1|Gnai2|Hnrnpk|Pkm|Prkci|Tgm2|Ipo5|Lars|Mars1	-2.9
D16	GO Biological Processes	19	GO:0006334	nucleosome assembly	19_GO:0009987 cellular process	-3.7	7	5.6	20504	82	215	6	2.8	1.1	14958|15441|26914|50708|50709|56702	H1f0|Hp1bp3|Macroh2a1|H1f2|H1f4|H1f5	-2.9
D16	GO Biological Processes	19	GO:0016571	histone methylation	19_GO:0008152 metabolic process	-3.6	5	5.1	20504	154	215	8	3.7	1.3	13433|13436|16468|26914|50708|50709|51869|56702	Dnmt1|Dnmt3b|Jarid2|Macroh2a1|H1f2|H1f4|Rif1|H1f5	-2.9
D16	WikiPathways	27	WP435	One-carbon metabolism		-3.6	13	6.7	20504	29	215	4	1.9	0.92	13433|13435|13436|108037	Dnmt1|Dnmt3a|Dnmt3b|Shmt2	-2.9
D16	GO Biological Processes	19	GO:0051574	positive regulation of histone H3-K9 methylation	19_GO:0048518 positive regulation of biological process	-3.6	24	8.1	20504	12	215	3	1.4	0.8	16468|51869|56702	Jarid2|Rif1|H1f5	-2.9
D16	GO Biological Processes	19	GO:0038063	collagen-activated tyrosine kinase receptor signaling pathway	19_GO:0023052 signaling	-3.6	24	8.1	20504	12	215	3	1.4	0.8	12826|12827|12842	Col4a1|Col4a2|Col1a1	-2.9
D16	Reactome Gene Sets	6	R-MMU-140342	Apoptosis induced DNA fragmentation		-3.6	24	8.1	20504	12	215	3	1.4	0.8	14958|50708|56702	H1f0|H1f2|H1f5	-2.9
D16	GO Molecular Functions	21	GO:0031543	peptidyl-proline dioxygenase activity		-3.6	24	8.1	20504	12	215	3	1.4	0.8	18451|18452|18453	P4ha1|P4ha2|P4hb	-2.9
D16	CORUM	33	CORUM:1001	DNA synthesome complex		-3.6	24	8.1	20504	12	215	3	1.4	0.8	16881|21969|21973	Lig1|Top1|Top2a	-2.9
D16	Reactome Gene Sets	6	R-MMU-3108232	SUMO E3 ligases SUMOylate target proteins		-3.6	4.9	5	20504	155	215	8	3.7	1.3	13433|13436|15387|21969|21973|57320|68275|326619	Dnmt1|Dnmt3b|Hnrnpk|Top1|Top2a|Park7|Rpa1|H4c1	-2.9
D16	Reactome Gene Sets	6	R-MMU-2500257	Resolution of Sister Chromatid Cohesion		-3.6	5.7	5.3	20504	117	215	7	3.3	1.2	12534|18817|22145|22152|103573|235661|268697	Cdk1|Plk1|Tuba4a|Tubb3|Xpo1|Dync1li1|Ccnb1	-2.9
D16	GO Biological Processes	19	GO:2001234	negative regulation of apoptotic signaling pathway	19_GO:0048519 negative regulation of biological process	-3.6	3.9	4.7	20504	242	215	10	4.7	1.4	12759|14161|14678|15201|52538|53610|56449|57320|68015|99571	Clu|Fga|Gnai2|Hells|Acaa2|Nono|Ybx3|Park7|Trap1|Fgg	-2.9
D16	KEGG Pathway	24	ko01200	Carbon metabolism		-3.6	5.7	5.2	20504	118	215	7	3.3	1.2	14433|15277|18641|18746|68263|108037|269951	Gapdh|Hk2|Pfkl|Pkm|Pdhb|Shmt2|Idh2	-2.9
D16	KEGG Pathway	24	mmu01200	Carbon metabolism		-3.6	5.7	5.2	20504	118	215	7	3.3	1.2	14433|15277|18641|18746|68263|108037|269951	Gapdh|Hk2|Pfkl|Pkm|Pdhb|Shmt2|Idh2	-2.9
D16	Reactome Gene Sets	6	R-MMU-68962	Activation of the pre-replicative complex		-3.6	13	6.6	20504	30	215	4	1.9	0.92	17215|17219|18392|68275	Mcm3|Mcm6|Orc1|Rpa1	-2.9
D16	GO Biological Processes	19	GO:0000470	maturation of LSU-rRNA	19_GO:0008152 metabolic process	-3.6	13	6.6	20504	30	215	4	1.9	0.92	64934|66229|69237|76130	Pes1|Rpl7l1|Gtpbp4|Las1l	-2.9
D16	KEGG Pathway	24	ko04510	Focal adhesion		-3.6	4.3	4.8	20504	199	215	9	4.2	1.4	12826|12827|12833|12834|12835|12842|12843|14268|226519	Col4a1|Col4a2|Col6a1|Col6a2|Col6a3|Col1a1|Col1a2|Fn1|Lamc1	-2.8
D16	GO Biological Processes	19	GO:0031060	regulation of histone methylation	19_GO:0008152 metabolic process	-3.6	6.7	5.5	20504	85	215	6	2.8	1.1	13433|13436|16468|26914|51869|56702	Dnmt1|Dnmt3b|Jarid2|Macroh2a1|Rif1|H1f5	-2.8
D16	GO Biological Processes	19	GO:0006090	pyruvate metabolic process	19_GO:0008152 metabolic process	-3.6	5.6	5.2	20504	120	215	7	3.3	1.2	14433|15277|16828|18641|18746|56428|68263	Gapdh|Hk2|Ldha|Pfkl|Pkm|Mtch2|Pdhb	-2.8
D16	GO Biological Processes	19	GO:0000070	mitotic sister chromatid segregation	19_GO:0009987 cellular process	-3.6	4.8	4.9	20504	159	215	8	3.7	1.3	18817|26914|26934|54392|68298|71819|235661|268697	Plk1|Macroh2a1|Racgap1|Ncapg|Ncapd2|Kif23|Dync1li1|Ccnb1	-2.8
D16	GO Biological Processes	19	GO:1903311	regulation of mRNA metabolic process	19_GO:0008152 metabolic process	-3.6	3.6	4.6	20504	293	215	11	5.1	1.5	11991|14265|15387|17454|19205|20218|52502|53379|74326|230257|268697	Hnrnpd|Fmr1|Hnrnpk|Mov10|Ptbp1|Khdrbs1|Carhsp1|Hnrnpa2b1|Hnrnpr|Ptbp3|Ccnb1	-2.8
D16	Reactome Gene Sets	6	R-MMU-2990846	SUMOylation		-3.5	4.8	4.9	20504	160	215	8	3.7	1.3	13433|13436|15387|21969|21973|57320|68275|326619	Dnmt1|Dnmt3b|Hnrnpk|Top1|Top2a|Park7|Rpa1|H4c1	-2.8
D16	GO Biological Processes	19	GO:0072376	protein activation cascade	19_GO:0050896 response to stimulus	-3.5	22	7.8	20504	13	215	3	1.4	0.8	14161|14268|99571	Fga|Fn1|Fgg	-2.8
D16	KEGG Pathway	24	mmu04510	Focal adhesion		-3.5	4.2	4.8	20504	203	215	9	4.2	1.4	12826|12827|12833|12834|12835|12842|12843|14268|226519	Col4a1|Col4a2|Col6a1|Col6a2|Col6a3|Col1a1|Col1a2|Fn1|Lamc1	-2.8
D16	GO Biological Processes	19	GO:0009060	aerobic respiration	19_GO:0008152 metabolic process	-3.5	4.7	4.9	20504	161	215	8	3.7	1.3	12534|56428|57320|66592|68263|108037|268697|269951	Cdk1|Mtch2|Park7|Stoml2|Pdhb|Shmt2|Ccnb1|Idh2	-2.8
D16	GO Biological Processes	19	GO:0009117	nucleotide metabolic process	19_GO:0008152 metabolic process	-3.5	3	4.3	20504	451	215	14	6.5	1.7	14104|14433|15277|18641|18746|51797|52538|56428|57320|66592|68263|69719|269951|353172	Fasn|Gapdh|Hk2|Pfkl|Pkm|Ctps|Acaa2|Mtch2|Park7|Stoml2|Pdhb|Cad|Idh2|Gars	-2.8
D16	GO Biological Processes	19	GO:0016032	viral process	19_GO:0016032 viral process	-3.5	3.3	4.5	20504	346	215	12	5.6	1.6	13138|13669|14265|15364|16647|18453|19035|19205|21973|27979|55944|223691	Dag1|Eif3a|Fmr1|Hmga2|Kpna2|P4hb|Ppib|Ptbp1|Top2a|Eif3b|Eif3d|Eif3l	-2.8
D16	GO Biological Processes	19	GO:1903827	regulation of cellular protein localization	19_GO:0051179 localization	-3.5	2.7	4.2	20504	564	215	16	7.4	1.8	11773|12464|12534|13138|14733|15387|18759|18817|22042|26914|30877|57320|67459|70572|70769|103573	Ap2m1|Cct4|Cdk1|Dag1|Gpc1|Hnrnpk|Prkci|Plk1|Tfrc|Macroh2a1|Gnl3|Park7|Nvl|Ipo5|Nolc1|Xpo1	-2.8
D16	GO Molecular Functions	21	GO:0051082	unfolded protein binding		-3.5	6.5	5.3	20504	88	215	6	2.8	1.1	12317|12406|12464|12759|14828|68015	Calr|Serpinh1|Cct4|Clu|Hspa5|Trap1	-2.8
D16	GO Biological Processes	19	GO:0006457	protein folding	19_GO:0009987 cellular process	-3.5	4.7	4.9	20504	163	215	8	3.7	1.3	12317|12464|12759|14828|18453|19035|68015|217737	Calr|Cct4|Clu|Hspa5|P4hb|Ppib|Trap1|Ahsa1	-2.8
D16	GO Biological Processes	19	GO:0050686	negative regulation of mRNA processing	19_GO:0048519 negative regulation of biological process	-3.5	12	6.4	20504	32	215	4	1.9	0.92	15387|19205|53379|230257	Hnrnpk|Ptbp1|Hnrnpa2b1|Ptbp3	-2.8
D16	GO Molecular Functions	21	GO:0030515	snoRNA binding		-3.5	12	6.4	20504	32	215	4	1.9	0.92	53414|53893|70769|217995	Bysl|Nudt5|Nolc1|Heatr1	-2.8
D16	GO Biological Processes	19	GO:0006260	DNA replication	19_GO:0008152 metabolic process	-3.5	3.8	4.6	20504	253	215	10	4.7	1.4	12534|16881|17215|17219|18392|21969|66592|68275|69237|74351	Cdk1|Lig1|Mcm3|Mcm6|Orc1|Top1|Stoml2|Rpa1|Gtpbp4|Ddx23	-2.7
D16	GO Biological Processes	19	GO:0034728	nucleosome organization	19_GO:0009987 cellular process	-3.5	5.3	5	20504	125	215	7	3.3	1.2	14958|15441|26914|50708|50709|56702|243529	H1f0|Hp1bp3|Macroh2a1|H1f2|H1f4|H1f5|H1f10	-2.7
D16	Reactome Gene Sets	6	R-MMU-6807878	COPI-mediated anterograde transport		-3.4	6.4	5.2	20504	90	215	6	2.8	1.1	12847|22145|22152|50797|59042|235661	Copa|Tuba4a|Tubb3|Copb2|Cope|Dync1li1	-2.7
D16	KEGG Pathway	24	mmu04611	Platelet activation		-3.4	5.3	5	20504	126	215	7	3.3	1.2	12825|12842|12843|14161|14678|18759|99571	Col3a1|Col1a1|Col1a2|Fga|Gnai2|Prkci|Fgg	-2.7
D16	GO Biological Processes	19	GO:0034249	negative regulation of cellular amide metabolic process	19_GO:0048519 negative regulation of biological process	-3.4	4.1	4.6	20504	209	215	9	4.2	1.4	11991|12317|12759|14265|14433|17454|53872|74326|208643	Hnrnpd|Calr|Clu|Fmr1|Gapdh|Mov10|Caprin1|Hnrnpr|Eif4g1	-2.7
D16	Reactome Gene Sets	6	R-MMU-9006934	Signaling by Receptor Tyrosine Kinases		-3.4	3.1	4.3	20504	406	215	13	6	1.6	11773|12814|12825|12826|12827|12831|12832|12833|12834|12842|12843|14268|59013	Ap2m1|Col11a1|Col3a1|Col4a1|Col4a2|Col5a1|Col5a2|Col6a1|Col6a2|Col1a1|Col1a2|Fn1|Hnrnph1	-2.7
D16	GO Biological Processes	19	GO:0071168	protein localization to chromatin	19_GO:0051179 localization	-3.4	12	6.2	20504	33	215	4	1.9	0.92	16468|18817|26914|56702	Jarid2|Plk1|Macroh2a1|H1f5	-2.7
D16	GO Biological Processes	19	GO:0009303	rRNA transcription	19_GO:0008152 metabolic process	-3.4	12	6.2	20504	33	215	4	1.9	0.92	21969|26914|216443|233863	Top1|Macroh2a1|Mars1|Gtf3c1	-2.7
D16	GO Biological Processes	19	GO:0051642	centrosome localization	19_GO:0051179 localization	-3.4	12	6.2	20504	33	215	4	1.9	0.92	77053|218977|223697|227695	Sun1|Dlgap5|Sun2|Spout1	-2.7
D16	GO Biological Processes	19	GO:0006002	fructose 6-phosphate metabolic process	19_GO:0008152 metabolic process	-3.4	20	7.5	20504	14	215	3	1.4	0.8	14584|15277|18641	Gfpt2|Hk2|Pfkl	-2.7
D16	GO Biological Processes	19	GO:0033127	regulation of histone phosphorylation	19_GO:0008152 metabolic process	-3.4	20	7.5	20504	14	215	3	1.4	0.8	14265|26914|268697	Fmr1|Macroh2a1|Ccnb1	-2.7
D16	GO Biological Processes	19	GO:0019511	peptidyl-proline hydroxylation	19_GO:0008152 metabolic process	-3.4	20	7.5	20504	14	215	3	1.4	0.8	18451|18452|18453	P4ha1|P4ha2|P4hb	-2.7
D16	GO Biological Processes	19	GO:1902969	mitotic DNA replication	19_GO:0008152 metabolic process	-3.4	20	7.5	20504	14	215	3	1.4	0.8	16881|17215|17219	Lig1|Mcm3|Mcm6	-2.7
D16	GO Biological Processes	19	GO:0001825	blastocyst formation	19_GO:0032502 developmental process	-3.4	8.1	5.6	20504	59	215	5	2.3	1	53414|66055|66229|74778|107071	Bysl|Sf3b6|Rpl7l1|Rrp7a|Wdr74	-2.7
D16	GO Biological Processes	19	GO:0016570	histone modification	19_GO:0008152 metabolic process	-3.4	2.9	4.2	20504	462	215	14	6.5	1.7	13433|13436|14265|15364|16468|18140|26914|50708|50709|51869|56702|57320|71514|268697	Dnmt1|Dnmt3b|Fmr1|Hmga2|Jarid2|Uhrf1|Macroh2a1|H1f2|H1f4|Rif1|H1f5|Park7|Sfpq|Ccnb1	-2.7
D16	GO Biological Processes	19	GO:0006399	tRNA metabolic process	19_GO:0008152 metabolic process	-3.4	4.5	4.7	20504	168	215	8	3.7	1.3	28114|70223|104458|105148|107045|110960|216443|353172	Nsun2|Nars|Rars|Iars|Lars|Tars|Mars1|Gars	-2.7
D16	Reactome Gene Sets	6	R-MMU-1640170	Cell Cycle		-3.4	2.6	4.1	20504	579	215	16	7.4	1.8	12534|16881|17215|17219|18392|18817|22145|22152|54392|68275|68298|71819|103573|235661|268697|326619	Cdk1|Lig1|Mcm3|Mcm6|Orc1|Plk1|Tuba4a|Tubb3|Ncapg|Rpa1|Ncapd2|Kif23|Xpo1|Dync1li1|Ccnb1|H4c1	-2.7
D16	Reactome Gene Sets	6	R-MMU-176187	Activation of ATR in response to replication stress		-3.4	11	6.1	20504	34	215	4	1.9	0.92	17215|17219|18392|68275	Mcm3|Mcm6|Orc1|Rpa1	-2.7
D16	GO Biological Processes	19	GO:0045920	negative regulation of exocytosis	19_GO:0048519 negative regulation of biological process	-3.4	11	6.1	20504	34	215	4	1.9	0.92	14265|14678|16859|16952	Fmr1|Gnai2|Lgals9|Anxa1	-2.7
D16	GO Biological Processes	19	GO:0061842	microtubule organizing center localization	19_GO:0051179 localization	-3.4	11	6.1	20504	34	215	4	1.9	0.92	77053|218977|223697|227695	Sun1|Dlgap5|Sun2|Spout1	-2.7
D16	GO Biological Processes	19	GO:0006356	regulation of transcription by RNA polymerase I	19_GO:0008152 metabolic process	-3.4	11	6.1	20504	34	215	4	1.9	0.92	26914|72515|216443|217995	Macroh2a1|Wdr43|Mars1|Heatr1	-2.7
D16	GO Biological Processes	19	GO:0009132	nucleoside diphosphate metabolic process	19_GO:0008152 metabolic process	-3.4	5.2	4.9	20504	129	215	7	3.3	1.2	14433|15277|18641|18746|53893|56428|69719	Gapdh|Hk2|Pfkl|Pkm|Nudt5|Mtch2|Cad	-2.7
D16	GO Biological Processes	19	GO:0046822	regulation of nucleocytoplasmic transport	19_GO:0051179 localization	-3.4	5.2	4.9	20504	129	215	7	3.3	1.2	12534|20218|28114|57320|70572|70769|103573	Cdk1|Khdrbs1|Nsun2|Park7|Ipo5|Nolc1|Xpo1	-2.7
D16	GO Biological Processes	19	GO:1903312	negative regulation of mRNA metabolic process	19_GO:0048519 negative regulation of biological process	-3.4	6.2	5.1	20504	93	215	6	2.8	1.1	11991|14265|15387|19205|53379|230257	Hnrnpd|Fmr1|Hnrnpk|Ptbp1|Hnrnpa2b1|Ptbp3	-2.7
D16	GO Biological Processes	19	GO:1903047	mitotic cell cycle process	19_GO:0009987 cellular process	-3.4	2.4	4	20504	701	215	18	8.4	1.9	12534|15364|16881|16952|17215|17219|17758|18392|18817|26914|26934|54392|68298|71819|208643|218977|235661|268697	Cdk1|Hmga2|Lig1|Anxa1|Mcm3|Mcm6|Map4|Orc1|Plk1|Macroh2a1|Racgap1|Ncapg|Ncapd2|Kif23|Eif4g1|Dlgap5|Dync1li1|Ccnb1	-2.6
D16	GO Biological Processes	19	GO:0051568	histone H3-K4 methylation	19_GO:0008152 metabolic process	-3.3	7.8	5.5	20504	61	215	5	2.3	1	13433|13436|26914|50708|50709	Dnmt1|Dnmt3b|Macroh2a1|H1f2|H1f4	-2.6
D16	WikiPathways	27	WP413	G1 to S cell cycle control		-3.3	7.8	5.5	20504	61	215	5	2.3	1	12534|17215|17219|18392|68275	Cdk1|Mcm3|Mcm6|Orc1|Rpa1	-2.6
D16	GO Biological Processes	19	GO:0022618	ribonucleoprotein complex assembly	19_GO:0009987 cellular process	-3.3	4.5	4.7	20504	171	215	8	3.7	1.3	13669|20044|20085|55944|56195|68879|74778|100019	Eif3a|Rps14|Rps19|Eif3d|Ptbp2|Prpf6|Rrp7a|Mdn1	-2.6
D16	GO Biological Processes	19	GO:0045333	cellular respiration	19_GO:0008152 metabolic process	-3.3	4	4.5	20504	215	215	9	4.2	1.4	12534|56428|57320|66592|68015|68263|108037|268697|269951	Cdk1|Mtch2|Park7|Stoml2|Trap1|Pdhb|Shmt2|Ccnb1|Idh2	-2.6
D16	GO Biological Processes	19	GO:2000765	regulation of cytoplasmic translation	19_GO:0008152 metabolic process	-3.3	19	7.2	20504	15	215	3	1.4	0.8	12785|14265|18746	Cnbp|Fmr1|Pkm	-2.6
D16	Reactome Gene Sets	6	R-MMU-372708	p130Cas linkage to MAPK signaling for integrins		-3.3	19	7.2	20504	15	215	3	1.4	0.8	14161|14268|99571	Fga|Fn1|Fgg	-2.6
D16	Reactome Gene Sets	6	R-MMU-354194	GRB2:SOS provides linkage to MAPK signaling for Integrins		-3.3	19	7.2	20504	15	215	3	1.4	0.8	14161|14268|99571	Fga|Fn1|Fgg	-2.6
D16	GO Biological Processes	19	GO:1904814	regulation of protein localization to chromosome, telomeric region	19_GO:0051179 localization	-3.3	19	7.2	20504	15	215	3	1.4	0.8	12464|26914|30877	Cct4|Macroh2a1|Gnl3	-2.6
D16	Reactome Gene Sets	6	R-MMU-72163	mRNA Splicing - Major Pathway		-3.3	4.4	4.7	20504	172	215	8	3.7	1.3	11991|15387|53379|59013|66055|68879|74326|74351	Hnrnpd|Hnrnpk|Hnrnpa2b1|Hnrnph1|Sf3b6|Prpf6|Hnrnpr|Ddx23	-2.6
D16	KEGG Pathway	24	ko03030	DNA replication		-3.3	11	6	20504	35	215	4	1.9	0.92	16881|17215|17219|68275	Lig1|Mcm3|Mcm6|Rpa1	-2.6
D16	GO Biological Processes	19	GO:0006446	regulation of translational initiation	19_GO:0008152 metabolic process	-3.3	7.7	5.4	20504	62	215	5	2.3	1	14265|20218|27979|208643|226982	Fmr1|Khdrbs1|Eif3b|Eif4g1|Eif5b	-2.6
D16	GO Molecular Functions	21	GO:0042826	histone deacetylase binding		-3.3	5.1	4.8	20504	132	215	7	3.3	1.2	11991|13433|13436|16647|21973|56702|71514	Hnrnpd|Dnmt1|Dnmt3b|Kpna2|Top2a|H1f5|Sfpq	-2.6
D16	GO Biological Processes	19	GO:0051053	negative regulation of DNA metabolic process	19_GO:0048519 negative regulation of biological process	-3.3	5.1	4.8	20504	132	215	7	3.3	1.2	14958|15364|50708|50709|51869|56702|243529	H1f0|Hmga2|H1f2|H1f4|Rif1|H1f5|H1f10	-2.6
D16	GO Biological Processes	19	GO:0031503	protein-containing complex localization	19_GO:0051179 localization	-3.3	3.6	4.4	20504	265	215	10	4.7	1.4	11773|11776|13138|13436|28114|53319|53379|68278|71514|103573	Ap2m1|Ap3d1|Dag1|Dnmt3b|Nsun2|Nxf1|Hnrnpa2b1|Ddx39a|Sfpq|Xpo1	-2.6
D16	GO Biological Processes	19	GO:0006974	cellular response to DNA damage stimulus	19_GO:0050896 response to stimulus	-3.3	2.4	3.9	20504	771	215	19	8.8	1.9	12534|12759|14265|15312|15364|15387|16881|17215|17219|18140|18817|21973|22224|51869|53610|56428|57320|68275|71514	Cdk1|Clu|Fmr1|Hmgn1|Hmga2|Hnrnpk|Lig1|Mcm3|Mcm6|Uhrf1|Plk1|Top2a|Usp10|Rif1|Nono|Mtch2|Park7|Rpa1|Sfpq	-2.6
D16	GO Biological Processes	19	GO:1902750	negative regulation of cell cycle G2/M phase transition	19_GO:0048519 negative regulation of biological process	-3.3	7.6	5.4	20504	63	215	5	2.3	1	12534|15364|18392|18817|26914	Cdk1|Hmga2|Orc1|Plk1|Macroh2a1	-2.6
D16	Reactome Gene Sets	6	R-MMU-9663891	Selective autophagy		-3.3	7.6	5.4	20504	63	215	5	2.3	1	22145|22152|57320|72542|235661	Tuba4a|Tubb3|Park7|Pgam5|Dync1li1	-2.6
D16	GO Biological Processes	19	GO:0042255	ribosome assembly	19_GO:0009987 cellular process	-3.3	7.6	5.4	20504	63	215	5	2.3	1	20044|20085|74778|100019|229317	Rps14|Rps19|Rrp7a|Mdn1|Eif2a	-2.6
D16	GO Biological Processes	19	GO:0048260	positive regulation of receptor-mediated endocytosis	19_GO:0051179 localization	-3.3	7.6	5.4	20504	63	215	5	2.3	1	11773|12306|12759|14265|15387	Ap2m1|Anxa2|Clu|Fmr1|Hnrnpk	-2.6
D16	Reactome Gene Sets	6	R-MMU-9646399	Aggrephagy		-3.3	11	5.9	20504	36	215	4	1.9	0.92	22145|22152|57320|235661	Tuba4a|Tubb3|Park7|Dync1li1	-2.6
D16	GO Biological Processes	19	GO:0000463	maturation of LSU-rRNA from tricistronic rRNA transcript (SSU-rRNA, 5.8S rRNA, LSU-rRNA)	19_GO:0008152 metabolic process	-3.2	18	7	20504	16	215	3	1.4	0.8	64934|66229|69237	Pes1|Rpl7l1|Gtpbp4	-2.6
D16	GO Biological Processes	19	GO:0046112	nucleobase biosynthetic process	19_GO:0008152 metabolic process	-3.2	18	7	20504	16	215	3	1.4	0.8	51797|69719|108037	Ctps|Cad|Shmt2	-2.6
D16	GO Biological Processes	19	GO:0038065	collagen-activated signaling pathway	19_GO:0023052 signaling	-3.2	18	7	20504	16	215	3	1.4	0.8	12826|12827|12842	Col4a1|Col4a2|Col1a1	-2.6
D16	Reactome Gene Sets	6	R-MMU-69620	Cell Cycle Checkpoints		-3.2	3.5	4.3	20504	270	215	10	4.7	1.4	12534|17215|17219|18392|18817|68275|103573|235661|268697|326619	Cdk1|Mcm3|Mcm6|Orc1|Plk1|Rpa1|Xpo1|Dync1li1|Ccnb1|H4c1	-2.5
D16	KEGG Pathway	24	mmu03030	DNA replication		-3.2	10	5.8	20504	37	215	4	1.9	0.92	16881|17215|17219|68275	Lig1|Mcm3|Mcm6|Rpa1	-2.5
D16	GO Biological Processes	19	GO:0016572	histone phosphorylation	19_GO:0008152 metabolic process	-3.2	10	5.8	20504	37	215	4	1.9	0.92	14265|15364|26914|268697	Fmr1|Hmga2|Macroh2a1|Ccnb1	-2.5
D16	GO Biological Processes	19	GO:1901605	alpha-amino acid metabolic process	19_GO:0008152 metabolic process	-3.2	4.3	4.5	20504	178	215	8	3.7	1.3	14584|26432|26433|27053|51797|57320|69719|108037	Gfpt2|Plod2|Plod3|Asns|Ctps|Park7|Cad|Shmt2	-2.5
D16	GO Biological Processes	19	GO:0071826	ribonucleoprotein complex subunit organization	19_GO:0009987 cellular process	-3.2	4.3	4.5	20504	178	215	8	3.7	1.3	13669|20044|20085|55944|56195|68879|74778|100019	Eif3a|Rps14|Rps19|Eif3d|Ptbp2|Prpf6|Rrp7a|Mdn1	-2.5
D16	Reactome Gene Sets	6	R-MMU-72172	mRNA Splicing		-3.2	4.3	4.5	20504	178	215	8	3.7	1.3	11991|15387|53379|59013|66055|68879|74326|74351	Hnrnpd|Hnrnpk|Hnrnpa2b1|Hnrnph1|Sf3b6|Prpf6|Hnrnpr|Ddx23	-2.5
D16	GO Biological Processes	19	GO:0006611	protein export from nucleus	19_GO:0051179 localization	-3.2	7.3	5.3	20504	65	215	5	2.3	1	12317|57320|72322|103573|110750	Calr|Park7|Xpo5|Xpo1|Cse1l	-2.5
D16	GO Biological Processes	19	GO:0045927	positive regulation of growth	19_GO:0040007 growth	-3.2	3.3	4.2	20504	321	215	11	5.1	1.5	12534|14268|15364|15387|19035|19664|56449|56702|208643|234374|268697	Cdk1|Fn1|Hmga2|Hnrnpk|Ppib|Rbpj|Ybx3|H1f5|Eif4g1|Ddx49|Ccnb1	-2.5
D16	GO Molecular Functions	21	GO:0019842	vitamin binding		-3.2	4.9	4.7	20504	137	215	7	3.3	1.2	14104|18451|18452|18822|26432|26433|108037	Fasn|P4ha1|P4ha2|Plod1|Plod2|Plod3|Shmt2	-2.5
D16	GO Biological Processes	19	GO:1902882	regulation of response to oxidative stress	19_GO:0050896 response to stimulus	-3.2	5.8	4.9	20504	99	215	6	2.8	1.1	18453|26914|53610|57320|68015|71514	P4hb|Macroh2a1|Nono|Park7|Trap1|Sfpq	-2.5
D16	GO Molecular Functions	21	GO:0016887	ATP hydrolysis activity		-3.2	3.8	4.4	20504	225	215	9	4.2	1.4	12464|14828|15525|18392|27407|67459|68015|71819|224742	Cct4|Hspa5|Hspa4|Orc1|Abcf2|Nvl|Trap1|Kif23|Abcf1	-2.5
D16	KEGG Pathway	24	ko04933	AGE-RAGE signaling pathway in diabetic complications		-3.2	5.7	4.9	20504	100	215	6	2.8	1.1	12825|12826|12827|12842|12843|14268	Col3a1|Col4a1|Col4a2|Col1a1|Col1a2|Fn1	-2.5
D16	GO Molecular Functions	21	GO:0030246	carbohydrate binding		-3.2	3.5	4.2	20504	275	215	10	4.7	1.4	12317|15277|16859|18451|18452|18641|18822|26432|26433|73744	Calr|Hk2|Lgals9|P4ha1|P4ha2|Pfkl|Plod1|Plod2|Plod3|Man2c1	-2.5
D16	GO Biological Processes	19	GO:2001243	negative regulation of intrinsic apoptotic signaling pathway	19_GO:0048519 negative regulation of biological process	-3.2	5.7	4.8	20504	101	215	6	2.8	1.1	12759|15201|53610|56449|57320|68015	Clu|Hells|Nono|Ybx3|Park7|Trap1	-2.5
D16	GO Biological Processes	19	GO:0036473	cell death in response to oxidative stress	19_GO:0050896 response to stimulus	-3.2	5.7	4.8	20504	101	215	6	2.8	1.1	17279|18453|53610|57320|68015|71514	Melk|P4hb|Nono|Park7|Trap1|Sfpq	-2.5
D16	GO Biological Processes	19	GO:0019693	ribose phosphate metabolic process	19_GO:0008152 metabolic process	-3.2	3	4.1	20504	379	215	12	5.6	1.6	14104|14433|15277|18641|18746|51797|52538|53893|56428|66592|68263|69719	Fasn|Gapdh|Hk2|Pfkl|Pkm|Ctps|Acaa2|Nudt5|Mtch2|Stoml2|Pdhb|Cad	-2.5
D16	GO Biological Processes	19	GO:0001886	endothelial cell morphogenesis	19_GO:0032502 developmental process	-3.2	17	6.7	20504	17	215	3	1.4	0.8	12819|12822|26433	Col15a1|Col18a1|Plod3	-2.5
D16	GO Molecular Functions	21	GO:0008301	DNA binding, bending		-3.2	17	6.7	20504	17	215	3	1.4	0.8	15364|21780|21973	Hmga2|Tfam|Top2a	-2.5
D16	GO Molecular Functions	21	GO:0061608	nuclear import signal receptor activity		-3.2	17	6.7	20504	17	215	3	1.4	0.8	16647|70572|76582	Kpna2|Ipo5|Ipo11	-2.5
D16	GO Biological Processes	19	GO:0007000	nucleolus organization	19_GO:0009987 cellular process	-3.2	17	6.7	20504	17	215	3	1.4	0.8	20085|64934|70769	Rps19|Pes1|Nolc1	-2.5
D16	GO Molecular Functions	21	GO:0005521	lamin binding		-3.2	17	6.7	20504	17	215	3	1.4	0.8	15387|77053|223697	Hnrnpk|Sun1|Sun2	-2.5
D16	GO Biological Processes	19	GO:0018208	peptidyl-proline modification	19_GO:0008152 metabolic process	-3.1	9.8	5.7	20504	39	215	4	1.9	0.92	18451|18452|18453|19035	P4ha1|P4ha2|P4hb|Ppib	-2.5
D16	GO Molecular Functions	21	GO:0019001	guanyl nucleotide binding		-3.1	3	4.1	20504	381	215	12	5.6	1.6	13660|14678|21817|22145|22152|30877|50709|69237|74006|104303|226982|235661	Ehd1|Gnai2|Tgm2|Tuba4a|Tubb3|Gnl3|H1f4|Gtpbp4|Dnm1l|Arl1|Eif5b|Dync1li1	-2.5
D16	GO Molecular Functions	21	GO:0032561	guanyl ribonucleotide binding		-3.1	3	4.1	20504	381	215	12	5.6	1.6	13660|14678|21817|22145|22152|30877|50709|69237|74006|104303|226982|235661	Ehd1|Gnai2|Tgm2|Tuba4a|Tubb3|Gnl3|H1f4|Gtpbp4|Dnm1l|Arl1|Eif5b|Dync1li1	-2.5
D16	GO Biological Processes	19	GO:0006261	DNA-dependent DNA replication	19_GO:0008152 metabolic process	-3.1	4.7	4.6	20504	142	215	7	3.3	1.2	16881|17215|17219|18392|66592|68275|74351	Lig1|Mcm3|Mcm6|Orc1|Stoml2|Rpa1|Ddx23	-2.4
D16	KEGG Pathway	24	mmu04933	AGE-RAGE signaling pathway in diabetic complications		-3.1	5.6	4.8	20504	103	215	6	2.8	1.1	12825|12826|12827|12842|12843|14268	Col3a1|Col4a1|Col4a2|Col1a1|Col1a2|Fn1	-2.4
D16	GO Biological Processes	19	GO:0048285	organelle fission	19_GO:0009987 cellular process	-3.1	2.7	3.9	20504	496	215	14	6.5	1.7	12317|18817|21973|26914|26934|54392|56428|68298|71819|72542|74006|77053|235661|268697	Calr|Plk1|Top2a|Macroh2a1|Racgap1|Ncapg|Mtch2|Ncapd2|Kif23|Pgam5|Dnm1l|Sun1|Dync1li1|Ccnb1	-2.4
D16	GO Biological Processes	19	GO:0032507	maintenance of protein location in cell	19_GO:0051179 localization	-3.1	6.9	5.1	20504	69	215	5	2.3	1	14828|15277|57320|77053|223697	Hspa5|Hk2|Park7|Sun1|Sun2	-2.4
D16	GO Biological Processes	19	GO:0017148	negative regulation of translation	19_GO:0048519 negative regulation of biological process	-3.1	4.1	4.4	20504	186	215	8	3.7	1.3	11991|12317|14265|14433|17454|53872|74326|208643	Hnrnpd|Calr|Fmr1|Gapdh|Mov10|Caprin1|Hnrnpr|Eif4g1	-2.4
D16	GO Biological Processes	19	GO:1902176	negative regulation of oxidative stress-induced intrinsic apoptotic signaling pathway	19_GO:0048519 negative regulation of biological process	-3.1	16	6.5	20504	18	215	3	1.4	0.8	53610|57320|68015	Nono|Park7|Trap1	-2.4
D16	GO Biological Processes	19	GO:2001244	positive regulation of intrinsic apoptotic signaling pathway	19_GO:0048518 positive regulation of biological process	-3.1	6.8	5	20504	70	215	5	2.3	1	12759|56428|57320|71514|74006	Clu|Mtch2|Park7|Sfpq|Dnm1l	-2.4
D16	GO Biological Processes	19	GO:1902749	regulation of cell cycle G2/M phase transition	19_GO:0050789 regulation of biological process	-3.1	5.4	4.7	20504	105	215	6	2.8	1.1	12534|15364|18392|18817|26914|268697	Cdk1|Hmga2|Orc1|Plk1|Macroh2a1|Ccnb1	-2.4
D16	Reactome Gene Sets	6	R-MMU-2132295	MHC class II antigen presentation		-3.1	5.4	4.7	20504	105	215	6	2.8	1.1	11773|22145|22152|26934|71819|235661	Ap2m1|Tuba4a|Tubb3|Racgap1|Kif23|Dync1li1	-2.4
D16	WikiPathways	27	WP150	DNA replication		-3.1	9.3	5.5	20504	41	215	4	1.9	0.92	17215|17219|18392|68275	Mcm3|Mcm6|Orc1|Rpa1	-2.4
D16	GO Biological Processes	19	GO:0018149	peptide cross-linking	19_GO:0008152 metabolic process	-3.1	9.3	5.5	20504	41	215	4	1.9	0.92	12825|14268|16952|21817	Col3a1|Fn1|Anxa1|Tgm2	-2.4
D16	GO Biological Processes	19	GO:0051235	maintenance of location	19_GO:0051179 localization	-3	3.1	4	20504	337	215	11	5.1	1.5	11776|13660|14118|14119|14828|15277|16859|57320|77053|223697|227695	Ap3d1|Ehd1|Fbn1|Fbn2|Hspa5|Hk2|Lgals9|Park7|Sun1|Sun2|Spout1	-2.4
D16	GO Biological Processes	19	GO:0050821	protein stabilization	19_GO:0065007 biological regulation	-3	4	4.3	20504	190	215	8	3.7	1.3	12317|12464|12759|14433|19035|56702|57320|69237	Calr|Cct4|Clu|Gapdh|Ppib|H1f5|Park7|Gtpbp4	-2.4
D16	Reactome Gene Sets	6	R-MMU-109582	Hemostasis		-3	2.6	3.8	20504	506	215	14	6.5	1.7	12306|12759|12842|12843|13660|14161|14268|14678|14733|22145|22152|26934|71819|99571	Anxa2|Clu|Col1a1|Col1a2|Ehd1|Fga|Fn1|Gnai2|Gpc1|Tuba4a|Tubb3|Racgap1|Kif23|Fgg	-2.4
D16	GO Biological Processes	19	GO:0006089	lactate metabolic process	19_GO:0008152 metabolic process	-3	15	6.3	20504	19	215	3	1.4	0.8	16828|56428|57320	Ldha|Mtch2|Park7	-2.4
D16	GO Molecular Functions	21	GO:0016208	AMP binding		-3	15	6.3	20504	19	215	3	1.4	0.8	18641|50709|109754	Pfkl|H1f4|Cyb5r3	-2.4
D16	GO Biological Processes	19	GO:0042730	fibrinolysis	19_GO:0048519 negative regulation of biological process	-3	15	6.3	20504	19	215	3	1.4	0.8	12306|14161|99571	Anxa2|Fga|Fgg	-2.4
D16	GO Biological Processes	19	GO:0050684	regulation of mRNA processing	19_GO:0008152 metabolic process	-3	4.5	4.4	20504	149	215	7	3.3	1.2	14265|15387|19205|20218|53379|230257|268697	Fmr1|Hnrnpk|Ptbp1|Khdrbs1|Hnrnpa2b1|Ptbp3|Ccnb1	-2.3
D16	GO Biological Processes	19	GO:0006305	DNA alkylation	19_GO:0008152 metabolic process	-3	6.5	4.9	20504	73	215	5	2.3	1	13433|13435|13436|15201|22715	Dnmt1|Dnmt3a|Dnmt3b|Hells|Zfp57	-2.3
D16	GO Biological Processes	19	GO:0006306	DNA methylation	19_GO:0008152 metabolic process	-3	6.5	4.9	20504	73	215	5	2.3	1	13433|13435|13436|15201|22715	Dnmt1|Dnmt3a|Dnmt3b|Hells|Zfp57	-2.3
D16	GO Biological Processes	19	GO:0008213	protein alkylation	19_GO:0008152 metabolic process	-3	3.9	4.2	20504	194	215	8	3.7	1.3	13433|13436|16468|26914|50708|50709|51869|56702	Dnmt1|Dnmt3b|Jarid2|Macroh2a1|H1f2|H1f4|Rif1|H1f5	-2.3
D16	GO Biological Processes	19	GO:0006479	protein methylation	19_GO:0008152 metabolic process	-3	3.9	4.2	20504	194	215	8	3.7	1.3	13433|13436|16468|26914|50708|50709|51869|56702	Dnmt1|Dnmt3b|Jarid2|Macroh2a1|H1f2|H1f4|Rif1|H1f5	-2.3
D16	GO Biological Processes	19	GO:0085029	extracellular matrix assembly	19_GO:0009987 cellular process	-3	8.9	5.3	20504	43	215	4	1.9	0.92	12825|12843|13138|26433	Col3a1|Col1a2|Dag1|Plod3	-2.3
D16	Reactome Gene Sets	6	R-MMU-1266738	Developmental Biology		-3	2.7	3.8	20504	454	215	13	6	1.6	11773|12825|12826|12827|12831|12832|12833|12834|13138|14733|16691|22145|22152	Ap2m1|Col3a1|Col4a1|Col4a2|Col5a1|Col5a2|Col6a1|Col6a2|Dag1|Gpc1|Krt8|Tuba4a|Tubb3	-2.3
D16	Reactome Gene Sets	6	R-MMU-8852276	The role of GTSE1 in G2/M progression after G2 checkpoint		-3	6.4	4.8	20504	74	215	5	2.3	1	12534|18817|22145|22152|268697	Cdk1|Plk1|Tuba4a|Tubb3|Ccnb1	-2.3
D16	Reactome Gene Sets	6	R-MMU-212300	PRC2 methylates histones and DNA		-3	6.4	4.8	20504	74	215	5	2.3	1	13433|13435|13436|16468|326619	Dnmt1|Dnmt3a|Dnmt3b|Jarid2|H4c1	-2.3
D16	GO Biological Processes	19	GO:0048024	regulation of mRNA splicing, via spliceosome	19_GO:0008152 metabolic process	-2.9	5.2	4.5	20504	111	215	6	2.8	1.1	14265|15387|19205|20218|53379|230257	Fmr1|Hnrnpk|Ptbp1|Khdrbs1|Hnrnpa2b1|Ptbp3	-2.3
D16	Reactome Gene Sets	6	R-MMU-69481	G2/M Checkpoints		-2.9	4.4	4.3	20504	152	215	7	3.3	1.2	12534|17215|17219|18392|68275|268697|326619	Cdk1|Mcm3|Mcm6|Orc1|Rpa1|Ccnb1|H4c1	-2.3
D16	GO Biological Processes	19	GO:0000028	ribosomal small subunit assembly	19_GO:0009987 cellular process	-2.9	14	6.1	20504	20	215	3	1.4	0.8	20044|20085|74778	Rps14|Rps19|Rrp7a	-2.3
D16	GO Biological Processes	19	GO:0006349	regulation of gene expression by genetic imprinting	19_GO:0008152 metabolic process	-2.9	14	6.1	20504	20	215	3	1.4	0.8	13435|13436|22715	Dnmt3a|Dnmt3b|Zfp57	-2.3
D16	Reactome Gene Sets	6	R-MMU-176412	Phosphorylation of the APC/C		-2.9	14	6.1	20504	20	215	3	1.4	0.8	12534|18817|268697	Cdk1|Plk1|Ccnb1	-2.3
D16	GO Biological Processes	19	GO:0007492	endoderm development	19_GO:0032502 developmental process	-2.9	6.4	4.8	20504	75	215	5	2.3	1	12831|12832|14268|15364|26914	Col5a1|Col5a2|Fn1|Hmga2|Macroh2a1	-2.3
D16	GO Biological Processes	19	GO:0071496	cellular response to external stimulus	19_GO:0050896 response to stimulus	-2.9	3.2	4	20504	295	215	10	4.7	1.4	12842|13138|14828|16828|20525|22042|27053|107045|208643|216443	Col1a1|Dag1|Hspa5|Ldha|Slc2a1|Tfrc|Asns|Lars|Eif4g1|Mars1	-2.3
D16	GO Biological Processes	19	GO:0046394	carboxylic acid biosynthetic process	19_GO:0008152 metabolic process	-2.9	3.2	4	20504	296	215	10	4.7	1.4	14104|16828|16952|18746|26432|26433|27053|57320|69719|108037	Fasn|Ldha|Anxa1|Pkm|Plod2|Plod3|Asns|Park7|Cad|Shmt2	-2.3
D16	GO Biological Processes	19	GO:0016053	organic acid biosynthetic process	19_GO:0008152 metabolic process	-2.9	3.2	4	20504	297	215	10	4.7	1.4	14104|16828|16952|18746|26432|26433|27053|57320|69719|108037	Fasn|Ldha|Anxa1|Pkm|Plod2|Plod3|Asns|Park7|Cad|Shmt2	-2.3
D16	GO Biological Processes	19	GO:0006119	oxidative phosphorylation	19_GO:0008152 metabolic process	-2.9	5.1	4.5	20504	113	215	6	2.8	1.1	12534|56428|57320|66592|108037|268697	Cdk1|Mtch2|Park7|Stoml2|Shmt2|Ccnb1	-2.3
D16	Reactome Gene Sets	6	R-MMU-8957275	Post-translational protein phosphorylation		-2.9	5	4.4	20504	114	215	6	2.8	1.1	14118|14161|14268|18453|99571|216197	Fbn1|Fga|Fn1|P4hb|Fgg|Ckap4	-2.3
D16	GO Biological Processes	19	GO:0009067	aspartate family amino acid biosynthetic process	19_GO:0008152 metabolic process	-2.9	14	6	20504	21	215	3	1.4	0.8	26432|26433|27053	Plod2|Plod3|Asns	-2.2
D16	GO Biological Processes	19	GO:0071426	ribonucleoprotein complex export from nucleus	19_GO:0051179 localization	-2.8	6	4.6	20504	79	215	5	2.3	1	28114|53319|53379|68278|103573	Nsun2|Nxf1|Hnrnpa2b1|Ddx39a|Xpo1	-2.2
D16	GO Biological Processes	19	GO:1903201	regulation of oxidative stress-induced cell death	19_GO:0050896 response to stimulus	-2.8	6	4.6	20504	79	215	5	2.3	1	18453|53610|57320|68015|71514	P4hb|Nono|Park7|Trap1|Sfpq	-2.2
D16	Reactome Gene Sets	6	R-MMU-2559586	DNA Damage/Telomere Stress Induced Senescence		-2.8	6	4.6	20504	79	215	5	2.3	1	14958|15364|50708|56702|326619	H1f0|Hmga2|H1f2|H1f5|H4c1	-2.2
D16	GO Molecular Functions	21	GO:0005525	GTP binding		-2.8	2.9	3.8	20504	358	215	11	5.1	1.5	13660|14678|21817|22145|22152|30877|50709|69237|74006|104303|226982	Ehd1|Gnai2|Tgm2|Tuba4a|Tubb3|Gnl3|H1f4|Gtpbp4|Dnm1l|Arl1|Eif5b	-2.2
D16	GO Biological Processes	19	GO:0015980	energy derivation by oxidation of organic compounds	19_GO:0008152 metabolic process	-2.8	3.1	3.9	20504	305	215	10	4.7	1.4	12534|16828|56428|57320|66592|68015|68263|108037|268697|269951	Cdk1|Ldha|Mtch2|Park7|Stoml2|Trap1|Pdhb|Shmt2|Ccnb1|Idh2	-2.2
D16	GO Biological Processes	19	GO:0071166	ribonucleoprotein complex localization	19_GO:0051179 localization	-2.8	6	4.6	20504	80	215	5	2.3	1	28114|53319|53379|68278|103573	Nsun2|Nxf1|Hnrnpa2b1|Ddx39a|Xpo1	-2.2
D16	GO Molecular Functions	21	GO:0005518	collagen binding		-2.8	6	4.6	20504	80	215	5	2.3	1	12406|12833|12834|14733|21810	Serpinh1|Col6a1|Col6a2|Gpc1|Tgfbi	-2.2
D16	GO Biological Processes	19	GO:0048511	rhythmic process	19_GO:0048511 rhythmic process	-2.8	3.1	3.8	20504	307	215	10	4.7	1.4	11991|12534|16952|21969|21973|53610|66645|71514|74006|232087	Hnrnpd|Cdk1|Anxa1|Top1|Top2a|Nono|Pspc1|Sfpq|Dnm1l|Mat2a	-2.2
D16	GO Biological Processes	19	GO:0010564	regulation of cell cycle process	19_GO:0050789 regulation of biological process	-2.8	2.3	3.6	20504	656	215	16	7.4	1.8	12317|12534|15364|16952|18392|18817|26914|26934|28114|71514|71819|73139|103573|208643|235661|268697	Calr|Cdk1|Hmga2|Anxa1|Orc1|Plk1|Macroh2a1|Racgap1|Nsun2|Sfpq|Kif23|Cenpv|Xpo1|Eif4g1|Dync1li1|Ccnb1	-2.2
D16	GO Biological Processes	19	GO:0051972	regulation of telomerase activity	19_GO:0008152 metabolic process	-2.8	7.9	5	20504	48	215	4	1.9	0.92	11991|12464|53379|67459	Hnrnpd|Cct4|Hnrnpa2b1|Nvl	-2.2
D16	Reactome Gene Sets	6	R-MMU-75153	Apoptotic execution phase		-2.8	7.9	5	20504	48	215	4	1.9	0.92	14958|50708|56702|74006	H1f0|H1f2|H1f5|Dnm1l	-2.2
D16	GO Biological Processes	19	GO:0032963	collagen metabolic process	19_GO:0008152 metabolic process	-2.8	4.8	4.3	20504	119	215	6	2.8	1.1	12406|12831|12842|12843|14268|26433	Serpinh1|Col5a1|Col1a1|Col1a2|Fn1|Plod3	-2.2
D16	GO Biological Processes	19	GO:1904019	epithelial cell apoptotic process	19_GO:0009987 cellular process	-2.8	4.8	4.3	20504	120	215	6	2.8	1.1	12822|14161|16691|18759|56428|99571	Col18a1|Fga|Krt8|Prkci|Mtch2|Fgg	-2.2
D16	Reactome Gene Sets	6	R-MMU-381426	Regulation of Insulin-like Growth Factor (IGF) transport and uptake by Insulin-like Growth Factor Binding Proteins (IGFBPs)		-2.8	4.8	4.3	20504	120	215	6	2.8	1.1	14118|14161|14268|18453|99571|216197	Fbn1|Fga|Fn1|P4hb|Fgg|Ckap4	-2.2
D16	GO Biological Processes	19	GO:0007052	mitotic spindle organization	19_GO:0009987 cellular process	-2.8	4.8	4.3	20504	120	215	6	2.8	1.1	17758|18817|26934|71819|218977|268697	Map4|Plk1|Racgap1|Kif23|Dlgap5|Ccnb1	-2.2
D16	GO Biological Processes	19	GO:0045943	positive regulation of transcription by RNA polymerase I	19_GO:0048518 positive regulation of biological process	-2.8	12	5.7	20504	23	215	3	1.4	0.8	72515|216443|217995	Wdr43|Mars1|Heatr1	-2.1
D16	GO Biological Processes	19	GO:0009259	ribonucleotide metabolic process	19_GO:0008152 metabolic process	-2.8	2.9	3.7	20504	367	215	11	5.1	1.5	14104|14433|15277|18641|18746|51797|52538|56428|66592|68263|69719	Fasn|Gapdh|Hk2|Pfkl|Pkm|Ctps|Acaa2|Mtch2|Stoml2|Pdhb|Cad	-2.1
D16	GO Molecular Functions	21	GO:0051020	GTPase binding		-2.7	3	3.8	20504	313	215	10	4.7	1.4	12306|13660|66592|70572|72322|74006|76582|103573|105148|110750	Anxa2|Ehd1|Stoml2|Ipo5|Xpo5|Dnm1l|Ipo11|Xpo1|Iars|Cse1l	-2.1
D16	GO Biological Processes	19	GO:0044818	mitotic G2/M transition checkpoint	19_GO:0048519 negative regulation of biological process	-2.7	7.6	4.8	20504	50	215	4	1.9	0.92	12534|15364|18392|18817	Cdk1|Hmga2|Orc1|Plk1	-2.1
D16	GO Biological Processes	19	GO:0031057	negative regulation of histone modification	19_GO:0048519 negative regulation of biological process	-2.7	7.6	4.8	20504	50	215	4	1.9	0.92	13433|13436|16468|26914	Dnmt1|Dnmt3b|Jarid2|Macroh2a1	-2.1
D16	GO Biological Processes	19	GO:0043487	regulation of RNA stability	19_GO:0008152 metabolic process	-2.7	4	4	20504	166	215	7	3.3	1.2	11991|14265|17454|28114|52502|74326|234374	Hnrnpd|Fmr1|Mov10|Nsun2|Carhsp1|Hnrnpr|Ddx49	-2.1
D16	GO Molecular Functions	21	GO:0008139	nuclear localization sequence binding		-2.7	12	5.5	20504	24	215	3	1.4	0.8	16647|70572|70769	Kpna2|Ipo5|Nolc1	-2.1
D16	GO Biological Processes	19	GO:0034383	low-density lipoprotein particle clearance	19_GO:0032501 multicellular organismal process	-2.7	12	5.5	20504	24	215	3	1.4	0.8	12306|13660|15387	Anxa2|Ehd1|Hnrnpk	-2.1
D16	GO Biological Processes	19	GO:0070734	histone H3-K27 methylation	19_GO:0008152 metabolic process	-2.7	12	5.5	20504	24	215	3	1.4	0.8	26914|50708|50709	Macroh2a1|H1f2|H1f4	-2.1
D16	KEGG Pathway	24	ko04110	Cell cycle		-2.7	4.6	4.2	20504	124	215	6	2.8	1.1	12534|17215|17219|18392|18817|268697	Cdk1|Mcm3|Mcm6|Orc1|Plk1|Ccnb1	-2.1
D16	GO Biological Processes	19	GO:0060627	regulation of vesicle-mediated transport	19_GO:0051179 localization	-2.7	2.3	3.5	20504	612	215	15	7	1.7	11773|12306|12317|12759|13660|14161|14265|14678|15387|16859|16952|21817|74006|98366|99571	Ap2m1|Anxa2|Calr|Clu|Ehd1|Fga|Fmr1|Gnai2|Hnrnpk|Lgals9|Anxa1|Tgm2|Dnm1l|Smap1|Fgg	-2.1
D16	WikiPathways	27	WP1770	One-carbon metabolism and related pathways		-2.7	7.3	4.7	20504	52	215	4	1.9	0.92	13435|108037|232087|625249	Dnmt3a|Shmt2|Mat2a|Gpx4	-2.1
D16	GO Biological Processes	19	GO:0006360	transcription by RNA polymerase I	19_GO:0008152 metabolic process	-2.7	7.3	4.7	20504	52	215	4	1.9	0.92	26914|72515|216443|217995	Macroh2a1|Wdr43|Mars1|Heatr1	-2.1
D16	Reactome Gene Sets	6	R-MMU-983189	Kinesins		-2.7	7.3	4.7	20504	52	215	4	1.9	0.92	22145|22152|26934|71819	Tuba4a|Tubb3|Racgap1|Kif23	-2.1
D16	GO Biological Processes	19	GO:0032206	positive regulation of telomere maintenance	19_GO:0048518 positive regulation of biological process	-2.7	7.3	4.7	20504	52	215	4	1.9	0.92	11991|12464|30877|53379	Hnrnpd|Cct4|Gnl3|Hnrnpa2b1	-2.1
D16	GO Biological Processes	19	GO:0048259	regulation of receptor-mediated endocytosis	19_GO:0051179 localization	-2.7	4.5	4.1	20504	126	215	6	2.8	1.1	11773|12306|12759|14265|15387|98366	Ap2m1|Anxa2|Clu|Fmr1|Hnrnpk|Smap1	-2.1
D16	GO Biological Processes	19	GO:0000723	telomere maintenance	19_GO:0008152 metabolic process	-2.7	4.5	4.1	20504	126	215	6	2.8	1.1	11991|12464|30877|51869|53379|68275	Hnrnpd|Cct4|Gnl3|Rif1|Hnrnpa2b1|Rpa1	-2.1
D16	GO Biological Processes	19	GO:1903306	negative regulation of regulated secretory pathway	19_GO:0048519 negative regulation of biological process	-2.7	11	5.4	20504	25	215	3	1.4	0.8	14265|14678|16859	Fmr1|Gnai2|Lgals9	-2.1
D16	GO Biological Processes	19	GO:2000679	positive regulation of transcription regulatory region DNA binding	19_GO:0065007 biological regulation	-2.7	11	5.4	20504	25	215	3	1.4	0.8	14958|16859|57320	H1f0|Lgals9|Park7	-2.1
D16	GO Biological Processes	19	GO:0051457	maintenance of protein location in nucleus	19_GO:0051179 localization	-2.7	11	5.4	20504	25	215	3	1.4	0.8	57320|77053|223697	Park7|Sun1|Sun2	-2.1
D16	GO Molecular Functions	21	GO:0016769	transferase activity, transferring nitrogenous groups		-2.7	11	5.4	20504	25	215	3	1.4	0.8	14433|14584|21817	Gapdh|Gfpt2|Tgm2	-2.1
D16	KEGG Pathway	24	mmu04110	Cell cycle		-2.7	4.5	4.1	20504	127	215	6	2.8	1.1	12534|17215|17219|18392|18817|268697	Cdk1|Mcm3|Mcm6|Orc1|Plk1|Ccnb1	-2.1
D16	GO Biological Processes	19	GO:2000351	regulation of endothelial cell apoptotic process	19_GO:0050789 regulation of biological process	-2.6	7.2	4.7	20504	53	215	4	1.9	0.92	12822|14161|18759|99571	Col18a1|Fga|Prkci|Fgg	-2
D16	GO Biological Processes	19	GO:0060043	regulation of cardiac muscle cell proliferation	19_GO:0040007 growth	-2.6	7.2	4.7	20504	53	215	4	1.9	0.92	12534|16468|19664|268697	Cdk1|Jarid2|Rbpj|Ccnb1	-2
D16	GO Biological Processes	19	GO:0098781	ncRNA transcription	19_GO:0008152 metabolic process	-2.6	7.2	4.7	20504	53	215	4	1.9	0.92	21969|26914|216443|233863	Top1|Macroh2a1|Mars1|Gtf3c1	-2
D16	GO Biological Processes	19	GO:0042752	regulation of circadian rhythm	19_GO:0048511 rhythmic process	-2.6	4.5	4.1	20504	128	215	6	2.8	1.1	11991|12534|21973|53610|66645|71514	Hnrnpd|Cdk1|Top2a|Nono|Pspc1|Sfpq	-2
D16	GO Biological Processes	19	GO:0045807	positive regulation of endocytosis	19_GO:0051179 localization	-2.6	4.5	4.1	20504	128	215	6	2.8	1.1	11773|12306|12759|14265|15387|74006	Ap2m1|Anxa2|Clu|Fmr1|Hnrnpk|Dnm1l	-2
D16	Reactome Gene Sets	6	R-MMU-68886	M Phase		-2.6	2.8	3.6	20504	380	215	11	5.1	1.5	12534|18817|22145|22152|54392|68298|71819|103573|235661|268697|326619	Cdk1|Plk1|Tuba4a|Tubb3|Ncapg|Ncapd2|Kif23|Xpo1|Dync1li1|Ccnb1|H4c1	-2
D16	GO Biological Processes	19	GO:0048639	positive regulation of developmental growth	19_GO:0040007 growth	-2.6	3.5	3.8	20504	221	215	8	3.7	1.3	12534|14268|15364|15387|19035|19664|56449|268697	Cdk1|Fn1|Hmga2|Hnrnpk|Ppib|Rbpj|Ybx3|Ccnb1	-2
D16	GO Biological Processes	19	GO:0006401	RNA catabolic process	19_GO:0008152 metabolic process	-2.6	3.1	3.7	20504	273	215	9	4.2	1.4	11991|14265|16341|17454|28114|52502|72662|74326|234374	Hnrnpd|Fmr1|Eif3e|Mov10|Nsun2|Carhsp1|Dis3|Hnrnpr|Ddx49	-2
D16	GO Biological Processes	19	GO:0007623	circadian rhythm	19_GO:0048511 rhythmic process	-2.6	3.4	3.8	20504	222	215	8	3.7	1.3	11991|12534|21969|21973|53610|66645|71514|232087	Hnrnpd|Cdk1|Top1|Top2a|Nono|Pspc1|Sfpq|Mat2a	-2
D16	GO Biological Processes	19	GO:0070199	establishment of protein localization to chromosome	19_GO:0051179 localization	-2.6	11	5.3	20504	26	215	3	1.4	0.8	12464|26914|56702	Cct4|Macroh2a1|H1f5	-2
D16	GO Biological Processes	19	GO:0005996	monosaccharide metabolic process	19_GO:0008152 metabolic process	-2.6	3.1	3.7	20504	274	215	9	4.2	1.4	14118|14433|15277|16828|18641|18746|53893|68263|73744	Fbn1|Gapdh|Hk2|Ldha|Pfkl|Pkm|Nudt5|Pdhb|Man2c1	-2
D16	GO Biological Processes	19	GO:0044728	DNA methylation or demethylation	19_GO:0008152 metabolic process	-2.6	5.3	4.2	20504	90	215	5	2.3	1	13433|13435|13436|15201|22715	Dnmt1|Dnmt3a|Dnmt3b|Hells|Zfp57	-2
D16	GO Biological Processes	19	GO:1900407	regulation of cellular response to oxidative stress	19_GO:0050896 response to stimulus	-2.6	5.3	4.2	20504	90	215	5	2.3	1	18453|53610|57320|68015|71514	P4hb|Nono|Park7|Trap1|Sfpq	-2
D16	GO Biological Processes	19	GO:0000075	cell cycle checkpoint signaling	19_GO:0048519 negative regulation of biological process	-2.6	3.8	3.8	20504	176	215	7	3.3	1.2	12534|15364|18392|18817|28114|235661|268697	Cdk1|Hmga2|Orc1|Plk1|Nsun2|Dync1li1|Ccnb1	-2
D16	GO Biological Processes	19	GO:0032200	telomere organization	19_GO:0009987 cellular process	-2.6	4.4	4	20504	131	215	6	2.8	1.1	11991|12464|30877|51869|53379|68275	Hnrnpd|Cct4|Gnl3|Rif1|Hnrnpa2b1|Rpa1	-2
D16	GO Biological Processes	19	GO:0032964	collagen biosynthetic process	19_GO:0008152 metabolic process	-2.6	6.9	4.5	20504	55	215	4	1.9	0.92	12406|12831|12842|14268	Serpinh1|Col5a1|Col1a1|Fn1	-2
D16	Reactome Gene Sets	6	R-MMU-354192	Integrin signaling		-2.6	11	5.1	20504	27	215	3	1.4	0.8	14161|14268|99571	Fga|Fn1|Fgg	-2
D16	GO Biological Processes	19	GO:0006891	intra-Golgi vesicle-mediated transport	19_GO:0051179 localization	-2.6	11	5.1	20504	27	215	3	1.4	0.8	12847|50797|59042	Copa|Copb2|Cope	-2
D16	GO Biological Processes	19	GO:0034063	stress granule assembly	19_GO:0009987 cellular process	-2.6	11	5.1	20504	27	215	3	1.4	0.8	23881|226562|233871	G3bp2|Prrc2c|Atxn2l	-2
D16	GO Biological Processes	19	GO:0072577	endothelial cell apoptotic process	19_GO:0009987 cellular process	-2.5	6.8	4.5	20504	56	215	4	1.9	0.92	12822|14161|18759|99571	Col18a1|Fga|Prkci|Fgg	-2
D16	GO Biological Processes	19	GO:0006096	glycolytic process	19_GO:0008152 metabolic process	-2.5	5.2	4.1	20504	92	215	5	2.3	1	14433|15277|18641|18746|56428	Gapdh|Hk2|Pfkl|Pkm|Mtch2	-2
D16	GO Biological Processes	19	GO:0017038	protein import	19_GO:0051179 localization	-2.5	3.3	3.7	20504	229	215	8	3.7	1.3	12534|12759|15525|16647|70572|70769|76582|110750	Cdk1|Clu|Hspa4|Kpna2|Ipo5|Nolc1|Ipo11|Cse1l	-1.9
D16	GO Biological Processes	19	GO:0006757	ATP generation from ADP	19_GO:0008152 metabolic process	-2.5	5.1	4.1	20504	93	215	5	2.3	1	14433|15277|18641|18746|56428	Gapdh|Hk2|Pfkl|Pkm|Mtch2	-1.9
D16	GO Biological Processes	19	GO:0008053	mitochondrial fusion	19_GO:0009987 cellular process	-2.5	10	5	20504	28	215	3	1.4	0.8	22042|66592|74006	Tfrc|Stoml2|Dnm1l	-1.9
D16	GO Biological Processes	19	GO:1903902	positive regulation of viral life cycle	19_GO:0016032 viral process	-2.5	10	5	20504	28	215	3	1.4	0.8	14265|16647|18453	Fmr1|Kpna2|P4hb	-1.9
D16	GO Biological Processes	19	GO:0031668	cellular response to extracellular stimulus	19_GO:0050896 response to stimulus	-2.5	3.3	3.6	20504	231	215	8	3.7	1.3	14828|16828|20525|22042|27053|107045|208643|216443	Hspa5|Ldha|Slc2a1|Tfrc|Asns|Lars|Eif4g1|Mars1	-1.9
D16	GO Biological Processes	19	GO:0007093	mitotic cell cycle checkpoint signaling	19_GO:0048519 negative regulation of biological process	-2.5	4.2	3.9	20504	136	215	6	2.8	1.1	12534|15364|18392|18817|235661|268697	Cdk1|Hmga2|Orc1|Plk1|Dync1li1|Ccnb1	-1.9
D16	GO Molecular Functions	21	GO:0050840	extracellular matrix binding		-2.5	6.6	4.4	20504	58	215	4	1.9	0.92	12306|13138|14733|21810	Anxa2|Dag1|Gpc1|Tgfbi	-1.9
D16	GO Molecular Functions	21	GO:0002020	protease binding		-2.5	3.6	3.7	20504	184	215	7	3.3	1.2	12306|12825|12842|12843|14268|15530|57320	Anxa2|Col3a1|Col1a1|Col1a2|Fn1|Hspg2|Park7	-1.9
D16	GO Biological Processes	19	GO:0046365	monosaccharide catabolic process	19_GO:0008152 metabolic process	-2.5	9.9	4.9	20504	29	215	3	1.4	0.8	16828|18641|53893	Ldha|Pfkl|Nudt5	-1.9
D16	GO Biological Processes	19	GO:0060045	positive regulation of cardiac muscle cell proliferation	19_GO:0040007 growth	-2.5	9.9	4.9	20504	29	215	3	1.4	0.8	12534|19664|268697	Cdk1|Rbpj|Ccnb1	-1.9
D16	Reactome Gene Sets	6	R-MMU-176408	Regulation of APC/C activators between G1/S and early anaphase		-2.5	9.9	4.9	20504	29	215	3	1.4	0.8	12534|18817|268697	Cdk1|Plk1|Ccnb1	-1.9
D16	KEGG Pathway	24	ko00310	Lysine degradation		-2.5	6.5	4.3	20504	59	215	4	1.9	0.92	18822|26432|26433|234407	Plod1|Plod2|Plod3|Colgalt1	-1.9
D16	GO Biological Processes	19	GO:0002181	cytoplasmic translation	19_GO:0008152 metabolic process	-2.5	5	4	20504	96	215	5	2.3	1	12785|13669|14265|18746|55944	Cnbp|Eif3a|Fmr1|Pkm|Eif3d	-1.9
D16	GO Biological Processes	19	GO:0042063	gliogenesis	19_GO:0032502 developmental process	-2.5	2.8	3.4	20504	344	215	10	4.7	1.4	12759|13138|14268|14733|15364|16952|18759|77053|223697|269951	Clu|Dag1|Fn1|Gpc1|Hmga2|Anxa1|Prkci|Sun1|Sun2|Idh2	-1.9
D16	GO Biological Processes	19	GO:0010389	regulation of G2/M transition of mitotic cell cycle	19_GO:0050789 regulation of biological process	-2.4	4.9	4	20504	97	215	5	2.3	1	12534|15364|18392|18817|268697	Cdk1|Hmga2|Orc1|Plk1|Ccnb1	-1.9
D16	GO Molecular Functions	21	GO:0003727	single-stranded RNA binding		-2.4	4.9	4	20504	97	215	5	2.3	1	12785|14265|16952|20218|50926	Cnbp|Fmr1|Anxa1|Khdrbs1|Hnrnpdl	-1.9
D16	GO Biological Processes	19	GO:0071427	mRNA-containing ribonucleoprotein complex export from nucleus	19_GO:0051179 localization	-2.4	6.4	4.3	20504	60	215	4	1.9	0.92	28114|53319|53379|68278	Nsun2|Nxf1|Hnrnpa2b1|Ddx39a	-1.9
D16	Reactome Gene Sets	6	R-MMU-2299718	Condensation of Prophase Chromosomes		-2.4	6.4	4.3	20504	60	215	4	1.9	0.92	12534|18817|268697|326619	Cdk1|Plk1|Ccnb1|H4c1	-1.9
D16	Reactome Gene Sets	6	R-MMU-2995410	Nuclear Envelope (NE) Reassembly		-2.4	6.4	4.3	20504	60	215	4	1.9	0.92	12534|22145|22152|268697	Cdk1|Tuba4a|Tubb3|Ccnb1	-1.9
D16	GO Biological Processes	19	GO:0006406	mRNA export from nucleus	19_GO:0051179 localization	-2.4	6.4	4.3	20504	60	215	4	1.9	0.92	28114|53319|53379|68278	Nsun2|Nxf1|Hnrnpa2b1|Ddx39a	-1.9
D16	GO Molecular Functions	21	GO:0031406	carboxylic acid binding		-2.4	3.6	3.6	20504	187	215	7	3.3	1.2	18451|18452|18822|26432|26433|104458|108037	P4ha1|P4ha2|Plod1|Plod2|Plod3|Rars|Shmt2	-1.9
D16	GO Biological Processes	19	GO:0034508	centromere complex assembly	19_GO:0009987 cellular process	-2.4	9.5	4.8	20504	30	215	3	1.4	0.8	15201|73139|218977	Hells|Cenpv|Dlgap5	-1.9
D16	GO Biological Processes	19	GO:0070198	protein localization to chromosome, telomeric region	19_GO:0051179 localization	-2.4	9.5	4.8	20504	30	215	3	1.4	0.8	12464|26914|30877	Cct4|Macroh2a1|Gnl3	-1.9
D16	GO Biological Processes	19	GO:0071711	basement membrane organization	19_GO:0009987 cellular process	-2.4	9.5	4.8	20504	30	215	3	1.4	0.8	12826|13138|26433	Col4a1|Dag1|Plod3	-1.9
D16	Reactome Gene Sets	6	R-MMU-70171	Glycolysis		-2.4	6.3	4.2	20504	61	215	4	1.9	0.92	14433|15277|18641|18746	Gapdh|Hk2|Pfkl|Pkm	-1.9
D16	GO Biological Processes	19	GO:0010972	negative regulation of G2/M transition of mitotic cell cycle	19_GO:0048519 negative regulation of biological process	-2.4	6.3	4.2	20504	61	215	4	1.9	0.92	12534|15364|18392|18817	Cdk1|Hmga2|Orc1|Plk1	-1.9
D16	GO Biological Processes	19	GO:0048524	positive regulation of viral process	19_GO:0016032 viral process	-2.4	6.3	4.2	20504	61	215	4	1.9	0.92	14265|16647|18453|21973	Fmr1|Kpna2|P4hb|Top2a	-1.9
D16	KEGG Pathway	24	mmu00310	Lysine degradation		-2.4	6.3	4.2	20504	61	215	4	1.9	0.92	18822|26432|26433|234407	Plod1|Plod2|Plod3|Colgalt1	-1.9
D16	GO Molecular Functions	21	GO:0005178	integrin binding		-2.4	4	3.7	20504	142	215	6	2.8	1.1	12317|12825|14118|14268|18453|21810	Calr|Col3a1|Fbn1|Fn1|P4hb|Tgfbi	-1.8
D16	Reactome Gene Sets	6	R-MMU-199977	ER to Golgi Anterograde Transport		-2.4	4	3.7	20504	142	215	6	2.8	1.1	12847|22145|22152|50797|59042|235661	Copa|Tuba4a|Tubb3|Copb2|Cope|Dync1li1	-1.8
D16	GO Biological Processes	19	GO:0006997	nucleus organization	19_GO:0009987 cellular process	-2.4	4	3.7	20504	142	215	6	2.8	1.1	18817|20085|64934|70769|77053|223697	Plk1|Rps19|Pes1|Nolc1|Sun1|Sun2	-1.8
D16	GO Biological Processes	19	GO:0051259	protein complex oligomerization	19_GO:0009987 cellular process	-2.4	3.2	3.5	20504	240	215	8	3.7	1.3	12843|13660|21817|23881|66592|74006|108037|232087	Col1a2|Ehd1|Tgm2|G3bp2|Stoml2|Dnm1l|Shmt2|Mat2a	-1.8
D16	GO Biological Processes	19	GO:0043588	skin development	19_GO:0032502 developmental process	-2.4	2.9	3.4	20504	294	215	9	4.2	1.4	12825|12831|12832|12842|12843|16952|19664|26914|28114	Col3a1|Col5a1|Col5a2|Col1a1|Col1a2|Anxa1|Rbpj|Macroh2a1|Nsun2	-1.8
D16	Reactome Gene Sets	6	R-MMU-76002	Platelet activation, signaling and aggregation		-2.4	3.2	3.5	20504	241	215	8	3.7	1.3	12759|12842|12843|14161|14268|14678|22145|99571	Clu|Col1a1|Col1a2|Fga|Fn1|Gnai2|Tuba4a|Fgg	-1.8
D16	GO Biological Processes	19	GO:0046622	positive regulation of organ growth	19_GO:0040007 growth	-2.4	6.2	4.2	20504	62	215	4	1.9	0.92	12534|19664|56449|268697	Cdk1|Rbpj|Ybx3|Ccnb1	-1.8
D16	GO Biological Processes	19	GO:0001944	vasculature development	19_GO:0032502 developmental process	-2.4	2.1	3.1	20504	789	215	17	7.9	1.8	12306|12819|12822|12825|12826|12827|12831|12842|12843|13433|14268|15277|15364|15530|16952|18746|19664	Anxa2|Col15a1|Col18a1|Col3a1|Col4a1|Col4a2|Col5a1|Col1a1|Col1a2|Dnmt1|Fn1|Hk2|Hmga2|Hspg2|Anxa1|Pkm|Rbpj	-1.8
D16	GO Biological Processes	19	GO:1902883	negative regulation of response to oxidative stress	19_GO:0048519 negative regulation of biological process	-2.4	9.2	4.7	20504	31	215	3	1.4	0.8	26914|57320|68015	Macroh2a1|Park7|Trap1	-1.8
D16	GO Biological Processes	19	GO:0006270	DNA replication initiation	19_GO:0008152 metabolic process	-2.4	9.2	4.7	20504	31	215	3	1.4	0.8	17215|17219|18392	Mcm3|Mcm6|Orc1	-1.8
D16	GO Biological Processes	19	GO:1901988	negative regulation of cell cycle phase transition	19_GO:0048519 negative regulation of biological process	-2.4	3.1	3.5	20504	243	215	8	3.7	1.3	12534|15364|18392|18817|26914|28114|235661|268697	Cdk1|Hmga2|Orc1|Plk1|Macroh2a1|Nsun2|Dync1li1|Ccnb1	-1.8
D16	GO Biological Processes	19	GO:0046031	ADP metabolic process	19_GO:0008152 metabolic process	-2.4	4.7	3.9	20504	101	215	5	2.3	1	14433|15277|18641|18746|56428	Gapdh|Hk2|Pfkl|Pkm|Mtch2	-1.8
D16	GO Biological Processes	19	GO:0008347	glial cell migration	19_GO:0040011 locomotion	-2.4	6.1	4.1	20504	63	215	4	1.9	0.92	14268|77053|223697|269951	Fn1|Sun1|Sun2|Idh2	-1.8
D16	GO Biological Processes	19	GO:0001704	formation of primary germ layer	19_GO:0032502 developmental process	-2.4	4.7	3.8	20504	102	215	5	2.3	1	12831|12832|14268|15364|26914	Col5a1|Col5a2|Fn1|Hmga2|Macroh2a1	-1.8
D16	KEGG Pathway	24	ko04922	Glucagon signaling pathway		-2.4	4.7	3.8	20504	102	215	5	2.3	1	16828|18641|18746|20525|68263	Ldha|Pfkl|Pkm|Slc2a1|Pdhb	-1.8
D16	GO Biological Processes	19	GO:0044839	cell cycle G2/M phase transition	19_GO:0009987 cellular process	-2.4	3.9	3.6	20504	146	215	6	2.8	1.1	12534|15364|18392|18817|26914|268697	Cdk1|Hmga2|Orc1|Plk1|Macroh2a1|Ccnb1	-1.8
D16	GO Biological Processes	19	GO:1902042	negative regulation of extrinsic apoptotic signaling pathway via death domain receptors	19_GO:0048519 negative regulation of biological process	-2.3	8.9	4.6	20504	32	215	3	1.4	0.8	14161|57320|99571	Fga|Park7|Fgg	-1.8
D16	GO Biological Processes	19	GO:0060148	positive regulation of posttranscriptional gene silencing	19_GO:0048519 negative regulation of biological process	-2.3	8.9	4.6	20504	32	215	3	1.4	0.8	14265|72322|208643	Fmr1|Xpo5|Eif4g1	-1.8
D16	GO Biological Processes	19	GO:0039694	viral RNA genome replication	19_GO:0016032 viral process	-2.3	8.9	4.6	20504	32	215	3	1.4	0.8	14265|15364|21973	Fmr1|Hmga2|Top2a	-1.8
D16	GO Molecular Functions	21	GO:0051287	NAD binding		-2.3	6	4.1	20504	64	215	4	1.9	0.92	14433|16828|109754|269951	Gapdh|Ldha|Cyb5r3|Idh2	-1.8
D16	GO Biological Processes	19	GO:0060999	positive regulation of dendritic spine development	19_GO:0048518 positive regulation of biological process	-2.3	6	4.1	20504	64	215	4	1.9	0.92	14265|15387|53872|74006	Fmr1|Hnrnpk|Caprin1|Dnm1l	-1.8
D16	GO Molecular Functions	21	GO:0016597	amino acid binding		-2.3	6	4.1	20504	64	215	4	1.9	0.92	69719|104458|108037|232087	Cad|Rars|Shmt2|Mat2a	-1.8
D16	GO Biological Processes	19	GO:0009064	glutamine family amino acid metabolic process	19_GO:0008152 metabolic process	-2.3	6	4.1	20504	64	215	4	1.9	0.92	14584|27053|51797|69719	Gfpt2|Asns|Ctps|Cad	-1.8
D16	GO Biological Processes	19	GO:1902850	microtubule cytoskeleton organization involved in mitosis	19_GO:0009987 cellular process	-2.3	3.9	3.6	20504	147	215	6	2.8	1.1	17758|18817|26934|71819|218977|268697	Map4|Plk1|Racgap1|Kif23|Dlgap5|Ccnb1	-1.8
D16	GO Biological Processes	19	GO:0043467	regulation of generation of precursor metabolites and energy	19_GO:0008152 metabolic process	-2.3	3.9	3.6	20504	147	215	6	2.8	1.1	12534|56428|57320|68015|108037|268697	Cdk1|Mtch2|Park7|Trap1|Shmt2|Ccnb1	-1.8
D16	GO Molecular Functions	21	GO:0031072	heat shock protein binding		-2.3	3.9	3.6	20504	147	215	6	2.8	1.1	12534|14828|15387|21780|22042|217737	Cdk1|Hspa5|Hnrnpk|Tfam|Tfrc|Ahsa1	-1.8
D16	GO Biological Processes	19	GO:0006304	DNA modification	19_GO:0008152 metabolic process	-2.3	4.6	3.8	20504	103	215	5	2.3	1	13433|13435|13436|15201|22715	Dnmt1|Dnmt3a|Dnmt3b|Hells|Zfp57	-1.8
D16	GO Biological Processes	19	GO:0042775	mitochondrial ATP synthesis coupled electron transport	19_GO:0008152 metabolic process	-2.3	5.9	4	20504	65	215	4	1.9	0.92	12534|56428|57320|268697	Cdk1|Mtch2|Park7|Ccnb1	-1.8
D16	GO Biological Processes	19	GO:0035195	gene silencing by miRNA	19_GO:0048519 negative regulation of biological process	-2.3	3.8	3.6	20504	149	215	6	2.8	1.1	14265|17454|53379|72322|208643|227695	Fmr1|Mov10|Hnrnpa2b1|Xpo5|Eif4g1|Spout1	-1.8
D16	GO Biological Processes	19	GO:0033260	nuclear DNA replication	19_GO:0008152 metabolic process	-2.3	8.7	4.5	20504	33	215	3	1.4	0.8	16881|17215|17219	Lig1|Mcm3|Mcm6	-1.8
D16	GO Biological Processes	19	GO:0070266	necroptotic process	19_GO:0009987 cellular process	-2.3	8.7	4.5	20504	33	215	3	1.4	0.8	56449|72542|74006	Ybx3|Pgam5|Dnm1l	-1.8
D16	GO Molecular Functions	21	GO:0050681	androgen receptor binding		-2.3	8.7	4.5	20504	33	215	3	1.4	0.8	12317|57320|68879	Calr|Park7|Prpf6	-1.8
D16	GO Biological Processes	19	GO:0009179	purine ribonucleoside diphosphate metabolic process	19_GO:0008152 metabolic process	-2.3	4.5	3.7	20504	105	215	5	2.3	1	14433|15277|18641|18746|56428	Gapdh|Hk2|Pfkl|Pkm|Mtch2	-1.8
D16	KEGG Pathway	24	mmu04922	Glucagon signaling pathway		-2.3	4.5	3.7	20504	105	215	5	2.3	1	16828|18641|18746|20525|68263	Ldha|Pfkl|Pkm|Slc2a1|Pdhb	-1.8
D16	GO Biological Processes	19	GO:0009135	purine nucleoside diphosphate metabolic process	19_GO:0008152 metabolic process	-2.3	4.5	3.7	20504	105	215	5	2.3	1	14433|15277|18641|18746|56428	Gapdh|Hk2|Pfkl|Pkm|Mtch2	-1.8
D16	GO Biological Processes	19	GO:0060038	cardiac muscle cell proliferation	19_GO:0040007 growth	-2.3	5.8	4	20504	66	215	4	1.9	0.92	12534|16468|19664|268697	Cdk1|Jarid2|Rbpj|Ccnb1	-1.7
D16	GO Biological Processes	19	GO:0060350	endochondral bone morphogenesis	19_GO:0032502 developmental process	-2.3	5.8	4	20504	66	215	4	1.9	0.92	12406|12825|12842|15530	Serpinh1|Col3a1|Col1a1|Hspg2	-1.7
D16	Reactome Gene Sets	6	R-MMU-9648025	EML4 and NUDC in mitotic spindle formation		-2.3	4.5	3.7	20504	106	215	5	2.3	1	18817|22145|22152|103573|235661	Plk1|Tuba4a|Tubb3|Xpo1|Dync1li1	-1.7
D16	GO Biological Processes	19	GO:0006165	nucleoside diphosphate phosphorylation	19_GO:0008152 metabolic process	-2.3	4.5	3.7	20504	106	215	5	2.3	1	14433|15277|18641|18746|56428	Gapdh|Hk2|Pfkl|Pkm|Mtch2	-1.7
D16	GO Biological Processes	19	GO:1900180	regulation of protein localization to nucleus	19_GO:0051179 localization	-2.3	3.8	3.5	20504	151	215	6	2.8	1.1	12534|22042|57320|67459|70572|70769	Cdk1|Tfrc|Park7|Nvl|Ipo5|Nolc1	-1.7
D16	GO Molecular Functions	21	GO:0035198	miRNA binding		-2.3	8.4	4.5	20504	34	215	3	1.4	0.8	14265|53379|227695	Fmr1|Hnrnpa2b1|Spout1	-1.7
D16	GO Biological Processes	19	GO:0051569	regulation of histone H3-K4 methylation	19_GO:0008152 metabolic process	-2.3	8.4	4.5	20504	34	215	3	1.4	0.8	13433|13436|26914	Dnmt1|Dnmt3b|Macroh2a1	-1.7
D16	GO Biological Processes	19	GO:0031647	regulation of protein stability	19_GO:0065007 biological regulation	-2.3	2.8	3.3	20504	308	215	9	4.2	1.4	12317|12464|12759|14433|18817|19035|56702|57320|69237	Calr|Cct4|Clu|Gapdh|Plk1|Ppib|H1f5|Park7|Gtpbp4	-1.7
D16	GO Biological Processes	19	GO:0042773	ATP synthesis coupled electron transport	19_GO:0008152 metabolic process	-2.3	5.7	4	20504	67	215	4	1.9	0.92	12534|56428|57320|268697	Cdk1|Mtch2|Park7|Ccnb1	-1.7
D16	GO Biological Processes	19	GO:0031589	cell-substrate adhesion	19_GO:0022610 biological adhesion	-2.3	2.6	3.2	20504	366	215	10	4.7	1.4	12317|12825|12842|13138|14161|14268|18074|18453|99571|226519	Calr|Col3a1|Col1a1|Dag1|Fga|Fn1|Nid2|P4hb|Fgg|Lamc1	-1.7
D16	Reactome Gene Sets	6	R-MMU-446203	Asparagine N-linked glycosylation		-2.3	3	3.3	20504	254	215	8	3.7	1.3	12317|12847|14584|22145|22152|50797|59042|235661	Calr|Copa|Gfpt2|Tuba4a|Tubb3|Copb2|Cope|Dync1li1	-1.7
D16	Reactome Gene Sets	6	R-MMU-212165	Epigenetic regulation of gene expression		-2.2	4.4	3.7	20504	108	215	5	2.3	1	13433|13435|13436|16468|326619	Dnmt1|Dnmt3a|Dnmt3b|Jarid2|H4c1	-1.7
D16	GO Biological Processes	19	GO:0010942	positive regulation of cell death	19_GO:0048518 positive regulation of biological process	-2.2	2.1	3	20504	682	215	15	7	1.7	12759|12822|13435|15364|16828|16952|17279|18759|21817|21973|56428|57320|71514|74006|208643	Clu|Col18a1|Dnmt3a|Hmga2|Ldha|Anxa1|Melk|Prkci|Tgm2|Top2a|Mtch2|Park7|Sfpq|Dnm1l|Eif4g1	-1.7
D16	GO Biological Processes	19	GO:0001837	epithelial to mesenchymal transition	19_GO:0032502 developmental process	-2.2	3.7	3.5	20504	154	215	6	2.8	1.1	12842|13138|15364|15384|19664|70769	Col1a1|Dag1|Hmga2|Hnrnpab|Rbpj|Nolc1	-1.7
D16	GO Biological Processes	19	GO:0006084	acetyl-CoA metabolic process	19_GO:0008152 metabolic process	-2.2	8.2	4.4	20504	35	215	3	1.4	0.8	14104|52538|68263	Fasn|Acaa2|Pdhb	-1.7
D16	Reactome Gene Sets	6	R-MMU-2129379	Molecules associated with elastic fibres		-2.2	8.2	4.4	20504	35	215	3	1.4	0.8	14118|14119|14268	Fbn1|Fbn2|Fn1	-1.7
D16	Reactome Gene Sets	6	R-MMU-437239	Recycling pathway of L1		-2.2	8.2	4.4	20504	35	215	3	1.4	0.8	11773|22145|22152	Ap2m1|Tuba4a|Tubb3	-1.7
D16	GO Molecular Functions	21	GO:0042162	telomeric DNA binding		-2.2	8.2	4.4	20504	35	215	3	1.4	0.8	11991|53379|68275	Hnrnpd|Hnrnpa2b1|Rpa1	-1.7
D16	GO Biological Processes	19	GO:0046939	nucleotide phosphorylation	19_GO:0008152 metabolic process	-2.2	4.4	3.6	20504	109	215	5	2.3	1	14433|15277|18641|18746|56428	Gapdh|Hk2|Pfkl|Pkm|Mtch2	-1.7
D16	GO Molecular Functions	21	GO:0042277	peptide binding		-2.2	2.6	3.2	20504	370	215	10	4.7	1.4	11773|12317|12759|16647|18822|19035|22152|53421|70572|70769	Ap2m1|Calr|Clu|Kpna2|Plod1|Ppib|Tubb3|Sec61a1|Ipo5|Nolc1	-1.7
D16	GO Biological Processes	19	GO:0019318	hexose metabolic process	19_GO:0008152 metabolic process	-2.2	3	3.3	20504	257	215	8	3.7	1.3	14118|14433|15277|16828|18641|18746|68263|73744	Fbn1|Gapdh|Hk2|Ldha|Pfkl|Pkm|Pdhb|Man2c1	-1.7
D16	GO Biological Processes	19	GO:0001568	blood vessel development	19_GO:0032502 developmental process	-2.2	2	3	20504	752	215	16	7.4	1.8	12306|12819|12822|12825|12826|12827|12831|12842|12843|14268|15277|15364|15530|16952|18746|19664	Anxa2|Col15a1|Col18a1|Col3a1|Col4a1|Col4a2|Col5a1|Col1a1|Col1a2|Fn1|Hk2|Hmga2|Hspg2|Anxa1|Pkm|Rbpj	-1.7
D16	GO Biological Processes	19	GO:0035194	post-transcriptional gene silencing by RNA	19_GO:0048519 negative regulation of biological process	-2.2	3.7	3.5	20504	155	215	6	2.8	1.1	14265|17454|53379|72322|208643|227695	Fmr1|Mov10|Hnrnpa2b1|Xpo5|Eif4g1|Spout1	-1.7
D16	GO Molecular Functions	21	GO:0016922	nuclear receptor binding		-2.2	3.7	3.5	20504	155	215	6	2.8	1.1	12317|13433|57320|68879|71990|223499	Calr|Dnmt1|Park7|Prpf6|Ddx54|Dcaf13	-1.7
D16	GO Biological Processes	19	GO:0000226	microtubule cytoskeleton organization	19_GO:0009987 cellular process	-2.2	2.2	3	20504	620	215	14	6.5	1.7	13138|14433|17758|18817|22145|22152|26934|71819|77053|103573|218977|223697|235661|268697	Dag1|Gapdh|Map4|Plk1|Tuba4a|Tubb3|Racgap1|Kif23|Sun1|Xpo1|Dlgap5|Sun2|Dync1li1|Ccnb1	-1.7
D16	GO Biological Processes	19	GO:0001701	in utero embryonic development	19_GO:0032502 developmental process	-2.2	2.2	3	20504	556	215	13	6	1.6	12825|16691|19664|26433|28114|53414|56449|66055|66229|68275|74778|107071|268697	Col3a1|Krt8|Rbpj|Plod3|Nsun2|Bysl|Ybx3|Sf3b6|Rpl7l1|Rpa1|Rrp7a|Wdr74|Ccnb1	-1.7
D16	GO Molecular Functions	21	GO:0008094	ATP-dependent activity, acting on DNA		-2.2	4.3	3.6	20504	110	215	5	2.3	1	15201|16952|17215|17219|21973	Hells|Anxa1|Mcm3|Mcm6|Top2a	-1.7
D16	GO Biological Processes	19	GO:0006281	DNA repair	19_GO:0050896 response to stimulus	-2.2	2.3	3	20504	496	215	12	5.6	1.6	15312|15364|16881|17215|17219|18140|22224|51869|53610|57320|68275|71514	Hmgn1|Hmga2|Lig1|Mcm3|Mcm6|Uhrf1|Usp10|Rif1|Nono|Park7|Rpa1|Sfpq	-1.7
D16	GO Biological Processes	19	GO:0021987	cerebral cortex development	19_GO:0032502 developmental process	-2.2	4.3	3.6	20504	111	215	5	2.3	1	12825|15387|70223|77053|223697	Col3a1|Hnrnpk|Nars|Sun1|Sun2	-1.7
D16	Reactome Gene Sets	6	R-MMU-71387	Metabolism of carbohydrates		-2.2	2.9	3.2	20504	262	215	8	3.7	1.3	14433|14733|15277|15530|18641|18746|20525|73744	Gapdh|Gpc1|Hk2|Hspg2|Pfkl|Pkm|Slc2a1|Man2c1	-1.7
D16	Reactome Gene Sets	6	R-MMU-2262752	Cellular responses to stress		-2.2	2.3	3	20504	499	215	12	5.6	1.6	14828|14958|15364|18453|22145|22152|50708|56702|68275|103573|235661|326619	Hspa5|H1f0|Hmga2|P4hb|Tuba4a|Tubb3|H1f2|H1f5|Rpa1|Xpo1|Dync1li1|H4c1	-1.7
D16	GO Molecular Functions	21	GO:0036002	pre-mRNA binding		-2.2	7.7	4.2	20504	37	215	3	1.4	0.8	15387|19205|53379	Hnrnpk|Ptbp1|Hnrnpa2b1	-1.6
D16	GO Biological Processes	19	GO:0071514	genetic imprinting	19_GO:0008152 metabolic process	-2.2	7.7	4.2	20504	37	215	3	1.4	0.8	13435|13436|22715	Dnmt3a|Dnmt3b|Zfp57	-1.6
D16	GO Biological Processes	19	GO:0007095	mitotic G2 DNA damage checkpoint signaling	19_GO:0048519 negative regulation of biological process	-2.2	7.7	4.2	20504	37	215	3	1.4	0.8	12534|15364|18817	Cdk1|Hmga2|Plk1	-1.6
D16	GO Molecular Functions	21	GO:0097718	disordered domain specific binding		-2.2	7.7	4.2	20504	37	215	3	1.4	0.8	11773|14268|14433	Ap2m1|Fn1|Gapdh	-1.6
D16	GO Molecular Functions	21	GO:0000217	DNA secondary structure binding		-2.2	7.7	4.2	20504	37	215	3	1.4	0.8	11991|14958|15364	Hnrnpd|H1f0|Hmga2	-1.6
D16	KEGG Pathway	24	ko00250	Alanine, aspartate and glutamate metabolism		-2.2	7.7	4.2	20504	37	215	3	1.4	0.8	14584|27053|69719	Gfpt2|Asns|Cad	-1.6
D16	GO Biological Processes	19	GO:1901987	regulation of cell cycle phase transition	19_GO:0050789 regulation of biological process	-2.2	2.5	3.1	20504	379	215	10	4.7	1.4	12534|15364|16952|18392|18817|26914|28114|208643|235661|268697	Cdk1|Hmga2|Anxa1|Orc1|Plk1|Macroh2a1|Nsun2|Eif4g1|Dync1li1|Ccnb1	-1.6
D16	Reactome Gene Sets	6	R-MMU-8953897	Cellular responses to stimuli		-2.2	2.3	3	20504	502	215	12	5.6	1.6	14828|14958|15364|18453|22145|22152|50708|56702|68275|103573|235661|326619	Hspa5|H1f0|Hmga2|P4hb|Tuba4a|Tubb3|H1f2|H1f5|Rpa1|Xpo1|Dync1li1|H4c1	-1.6
D16	GO Biological Processes	19	GO:0009201	ribonucleoside triphosphate biosynthetic process	19_GO:0008152 metabolic process	-2.2	5.3	3.8	20504	72	215	4	1.9	0.92	18746|51797|66592|69719	Pkm|Ctps|Stoml2|Cad	-1.6
D16	GO Biological Processes	19	GO:0006898	receptor-mediated endocytosis	19_GO:0051179 localization	-2.2	2.9	3.2	20504	265	215	8	3.7	1.3	11773|12306|12759|14265|15387|15530|22042|98366	Ap2m1|Anxa2|Clu|Fmr1|Hnrnpk|Hspg2|Tfrc|Smap1	-1.6
D16	GO Biological Processes	19	GO:0051702	biological process involved in interaction with symbiont	19_GO:0044419 biological process involved in interspecies interaction between organisms	-2.2	4.2	3.5	20504	114	215	5	2.3	1	14265|14268|14433|15364|19035	Fmr1|Fn1|Gapdh|Hmga2|Ppib	-1.6
D16	Reactome Gene Sets	6	R-MMU-69239	Synthesis of DNA		-2.2	4.2	3.5	20504	114	215	5	2.3	1	16881|17215|17219|18392|68275	Lig1|Mcm3|Mcm6|Orc1|Rpa1	-1.6
D16	GO Biological Processes	19	GO:0016441	posttranscriptional gene silencing	19_GO:0048519 negative regulation of biological process	-2.1	3.6	3.3	20504	161	215	6	2.8	1.1	14265|17454|53379|72322|208643|227695	Fmr1|Mov10|Hnrnpa2b1|Xpo5|Eif4g1|Spout1	-1.6
D16	GO Molecular Functions	21	GO:0008017	microtubule binding		-2.1	2.9	3.2	20504	266	215	8	3.7	1.3	14265|14433|17758|18817|26934|71819|74006|218977	Fmr1|Gapdh|Map4|Plk1|Racgap1|Kif23|Dnm1l|Dlgap5	-1.6
D16	GO Biological Processes	19	GO:0000280	nuclear division	19_GO:0009987 cellular process	-2.1	2.4	3	20504	443	215	11	5.1	1.5	12317|18817|21973|26914|26934|54392|68298|71819|77053|235661|268697	Calr|Plk1|Top2a|Macroh2a1|Racgap1|Ncapg|Ncapd2|Kif23|Sun1|Dync1li1|Ccnb1	-1.6
D16	Reactome Gene Sets	6	R-MMU-114608	Platelet degranulation		-2.1	4.1	3.5	20504	115	215	5	2.3	1	12759|14161|14268|22145|99571	Clu|Fga|Fn1|Tuba4a|Fgg	-1.6
D16	KEGG Pathway	24	ko00620	Pyruvate metabolism		-2.1	7.5	4.1	20504	38	215	3	1.4	0.8	16828|18746|68263	Ldha|Pkm|Pdhb	-1.6
D16	GO Biological Processes	19	GO:0044786	cell cycle DNA replication	19_GO:0008152 metabolic process	-2.1	7.5	4.1	20504	38	215	3	1.4	0.8	16881|17215|17219	Lig1|Mcm3|Mcm6	-1.6
D16	GO Biological Processes	19	GO:1902229	regulation of intrinsic apoptotic signaling pathway in response to DNA damage	19_GO:0023052 signaling	-2.1	7.5	4.1	20504	38	215	3	1.4	0.8	12759|15387|56428	Clu|Hnrnpk|Mtch2	-1.6
D16	GO Biological Processes	19	GO:0009066	aspartate family amino acid metabolic process	19_GO:0008152 metabolic process	-2.1	7.5	4.1	20504	38	215	3	1.4	0.8	26432|26433|27053	Plod2|Plod3|Asns	-1.6
D16	GO Biological Processes	19	GO:0034381	plasma lipoprotein particle clearance	19_GO:0032501 multicellular organismal process	-2.1	7.5	4.1	20504	38	215	3	1.4	0.8	12306|13660|15387	Anxa2|Ehd1|Hnrnpk	-1.6
D16	Reactome Gene Sets	6	R-MMU-68882	Mitotic Anaphase		-2.1	3.1	3.2	20504	213	215	7	3.3	1.2	12534|18817|22145|22152|103573|235661|268697	Cdk1|Plk1|Tuba4a|Tubb3|Xpo1|Dync1li1|Ccnb1	-1.6
D16	GO Molecular Functions	21	GO:0016741	transferase activity, transferring one-carbon groups		-2.1	3.1	3.2	20504	213	215	7	3.3	1.2	13433|13435|13436|28114|69719|108037|227695	Dnmt1|Dnmt3a|Dnmt3b|Nsun2|Cad|Shmt2|Spout1	-1.6
D16	Reactome Gene Sets	6	R-MMU-2555396	Mitotic Metaphase and Anaphase		-2.1	3.1	3.2	20504	214	215	7	3.3	1.2	12534|18817|22145|22152|103573|235661|268697	Cdk1|Plk1|Tuba4a|Tubb3|Xpo1|Dync1li1|Ccnb1	-1.6
D16	GO Biological Processes	19	GO:0002062	chondrocyte differentiation	19_GO:0032502 developmental process	-2.1	4.1	3.5	20504	116	215	5	2.3	1	12406|12814|12825|15364|15530	Serpinh1|Col11a1|Col3a1|Hmga2|Hspg2	-1.6
D16	GO Biological Processes	19	GO:0060968	regulation of gene silencing	19_GO:0048519 negative regulation of biological process	-2.1	5.2	3.7	20504	74	215	4	1.9	0.92	13433|14265|72322|208643	Dnmt1|Fmr1|Xpo5|Eif4g1	-1.6
D16	GO Biological Processes	19	GO:0009165	nucleotide biosynthetic process	19_GO:0008152 metabolic process	-2.1	3.1	3.2	20504	215	215	7	3.3	1.2	18746|51797|66592|68263|69719|269951|353172	Pkm|Ctps|Stoml2|Pdhb|Cad|Idh2|Gars	-1.6
D16	GO Molecular Functions	21	GO:0033218	amide binding		-2.1	2.3	3	20504	447	215	11	5.1	1.5	11773|12317|12759|14104|16647|18822|19035|22152|53421|70572|70769	Ap2m1|Calr|Clu|Fasn|Kpna2|Plod1|Ppib|Tubb3|Sec61a1|Ipo5|Nolc1	-1.6
D16	GO Biological Processes	19	GO:0060351	cartilage development involved in endochondral bone morphogenesis	19_GO:0032502 developmental process	-2.1	7.3	4.1	20504	39	215	3	1.4	0.8	12406|12842|15530	Serpinh1|Col1a1|Hspg2	-1.6
D16	GO Molecular Functions	21	GO:0070717	poly-purine tract binding		-2.1	7.3	4.1	20504	39	215	3	1.4	0.8	14265|20218|50926	Fmr1|Khdrbs1|Hnrnpdl	-1.6
D16	Reactome Gene Sets	6	R-MMU-5674135	MAP2K and MAPK activation		-2.1	7.3	4.1	20504	39	215	3	1.4	0.8	14161|14268|99571	Fga|Fn1|Fgg	-1.6
D16	GO Biological Processes	19	GO:0009112	nucleobase metabolic process	19_GO:0008152 metabolic process	-2.1	7.3	4.1	20504	39	215	3	1.4	0.8	51797|69719|108037	Ctps|Cad|Shmt2	-1.6
D16	GO Biological Processes	19	GO:0034661	ncRNA catabolic process	19_GO:0008152 metabolic process	-2.1	7.3	4.1	20504	39	215	3	1.4	0.8	28114|72662|234374	Nsun2|Dis3|Ddx49	-1.6
D16	GO Molecular Functions	21	GO:0043531	ADP binding		-2.1	7.3	4.1	20504	39	215	3	1.4	0.8	18746|50709|109754	Pkm|H1f4|Cyb5r3	-1.6
D16	GO Biological Processes	19	GO:0034655	nucleobase-containing compound catabolic process	19_GO:0008152 metabolic process	-2.1	2.5	3	20504	387	215	10	4.7	1.4	11991|14265|16341|17454|28114|52502|53893|72662|74326|234374	Hnrnpd|Fmr1|Eif3e|Mov10|Nsun2|Carhsp1|Nudt5|Dis3|Hnrnpr|Ddx49	-1.6
D16	Reactome Gene Sets	6	R-MMU-196854	Metabolism of vitamins and cofactors		-2.1	3.5	3.3	20504	165	215	6	2.8	1.1	14104|14733|15530|20525|108037|109754	Fasn|Gpc1|Hspg2|Slc2a1|Shmt2|Cyb5r3	-1.6
D16	GO Biological Processes	19	GO:0001885	endothelial cell development	19_GO:0032502 developmental process	-2.1	5.1	3.6	20504	75	215	4	1.9	0.92	12819|12822|14104|26433	Col15a1|Col18a1|Fasn|Plod3	-1.6
D16	GO Biological Processes	19	GO:0000380	alternative mRNA splicing, via spliceosome	19_GO:0008152 metabolic process	-2.1	5.1	3.6	20504	75	215	4	1.9	0.92	14265|19205|20218|71514	Fmr1|Ptbp1|Khdrbs1|Sfpq	-1.6
D16	Reactome Gene Sets	6	R-MMU-9612973	Autophagy		-2.1	4	3.4	20504	118	215	5	2.3	1	22145|22152|57320|72542|235661	Tuba4a|Tubb3|Park7|Pgam5|Dync1li1	-1.6
D16	Reactome Gene Sets	6	R-MMU-1632852	Macroautophagy		-2.1	4	3.4	20504	118	215	5	2.3	1	22145|22152|57320|72542|235661	Tuba4a|Tubb3|Park7|Pgam5|Dync1li1	-1.6
D16	GO Biological Processes	19	GO:0045446	endothelial cell differentiation	19_GO:0032502 developmental process	-2.1	4	3.4	20504	119	215	5	2.3	1	12819|12822|14104|19664|26433	Col15a1|Col18a1|Fasn|Rbpj|Plod3	-1.6
D16	KEGG Pathway	24	mmu00250	Alanine, aspartate and glutamate metabolism		-2.1	7.2	4	20504	40	215	3	1.4	0.8	14584|27053|69719	Gfpt2|Asns|Cad	-1.6
D16	Reactome Gene Sets	6	R-MMU-190828	Gap junction trafficking		-2.1	7.2	4	20504	40	215	3	1.4	0.8	11773|22145|22152	Ap2m1|Tuba4a|Tubb3	-1.6
D16	GO Biological Processes	19	GO:0007094	mitotic spindle assembly checkpoint signaling	19_GO:0048519 negative regulation of biological process	-2.1	7.2	4	20504	40	215	3	1.4	0.8	18817|235661|268697	Plk1|Dync1li1|Ccnb1	-1.6
D16	GO Biological Processes	19	GO:0006284	base-excision repair	19_GO:0050896 response to stimulus	-2.1	7.2	4	20504	40	215	3	1.4	0.8	15364|16881|68275	Hmga2|Lig1|Rpa1	-1.6
D16	GO Biological Processes	19	GO:0042398	cellular modified amino acid biosynthetic process	19_GO:0008152 metabolic process	-2.1	7.2	4	20504	40	215	3	1.4	0.8	26432|26433|57320	Plod2|Plod3|Park7	-1.6
D16	GO Biological Processes	19	GO:0071173	spindle assembly checkpoint signaling	19_GO:0048519 negative regulation of biological process	-2.1	7.2	4	20504	40	215	3	1.4	0.8	18817|235661|268697	Plk1|Dync1li1|Ccnb1	-1.6
D16	GO Biological Processes	19	GO:1901293	nucleoside phosphate biosynthetic process	19_GO:0008152 metabolic process	-2.1	3	3.1	20504	220	215	7	3.3	1.2	18746|51797|66592|68263|69719|269951|353172	Pkm|Ctps|Stoml2|Pdhb|Cad|Idh2|Gars	-1.6
D16	GO Biological Processes	19	GO:0051651	maintenance of location in cell	19_GO:0051179 localization	-2.1	3	3.1	20504	220	215	7	3.3	1.2	11776|14828|15277|57320|77053|223697|227695	Ap3d1|Hspa5|Hk2|Park7|Sun1|Sun2|Spout1	-1.6
D16	Reactome Gene Sets	6	R-MMU-76005	Response to elevated platelet cytosolic Ca2+		-2.1	4	3.4	20504	120	215	5	2.3	1	12759|14161|14268|22145|99571	Clu|Fga|Fn1|Tuba4a|Fgg	-1.6
D16	GO Biological Processes	19	GO:0051321	meiotic cell cycle	19_GO:0022414 reproductive process	-2.1	2.6	3	20504	333	215	9	4.2	1.4	12317|15364|18817|21973|28114|68275|68298|77053|223697	Calr|Hmga2|Plk1|Top2a|Nsun2|Rpa1|Ncapd2|Sun1|Sun2	-1.6
D16	GO Biological Processes	19	GO:1901991	negative regulation of mitotic cell cycle phase transition	19_GO:0048519 negative regulation of biological process	-2	3.4	3.2	20504	169	215	6	2.8	1.1	12534|15364|18392|18817|235661|268697	Cdk1|Hmga2|Orc1|Plk1|Dync1li1|Ccnb1	-1.5
D16	GO Biological Processes	19	GO:0010035	response to inorganic substance	19_GO:0050896 response to stimulus	-2	2.2	2.9	20504	520	215	12	5.6	1.6	11991|14161|14265|14268|14433|16691|16881|16952|22042|57320|68015|99571	Hnrnpd|Fga|Fmr1|Fn1|Gapdh|Krt8|Lig1|Anxa1|Tfrc|Park7|Trap1|Fgg	-1.5
D16	GO Biological Processes	19	GO:0006998	nuclear envelope organization	19_GO:0009987 cellular process	-2	7	3.9	20504	41	215	3	1.4	0.8	18817|77053|223697	Plk1|Sun1|Sun2	-1.5
D16	GO Molecular Functions	21	GO:0031267	small GTPase binding		-2	2.8	3	20504	277	215	8	3.7	1.3	12306|13660|70572|72322|74006|76582|103573|110750	Anxa2|Ehd1|Ipo5|Xpo5|Dnm1l|Ipo11|Xpo1|Cse1l	-1.5
D16	GO Biological Processes	19	GO:0072521	purine-containing compound metabolic process	19_GO:0008152 metabolic process	-2	2.4	2.9	20504	395	215	10	4.7	1.4	14104|14433|15277|18641|18746|52538|56428|66592|68263|108037	Fasn|Gapdh|Hk2|Pfkl|Pkm|Acaa2|Mtch2|Stoml2|Pdhb|Shmt2	-1.5
D16	GO Biological Processes	19	GO:0032386	regulation of intracellular transport	19_GO:0051179 localization	-2	2.6	3	20504	335	215	9	4.2	1.4	12306|12534|13660|20218|28114|57320|70572|70769|103573	Anxa2|Cdk1|Ehd1|Khdrbs1|Nsun2|Park7|Ipo5|Nolc1|Xpo1	-1.5
D16	GO Biological Processes	19	GO:0051054	positive regulation of DNA metabolic process	19_GO:0048518 positive regulation of biological process	-2	3	3.1	20504	222	215	7	3.3	1.2	11991|12464|22042|30877|51869|53379|67459	Hnrnpd|Cct4|Tfrc|Gnl3|Rif1|Hnrnpa2b1|Nvl	-1.5
D16	Reactome Gene Sets	6	R-MMU-948021	Transport to the Golgi and subsequent modification		-2	3.4	3.2	20504	170	215	6	2.8	1.1	12847|22145|22152|50797|59042|235661	Copa|Tuba4a|Tubb3|Copb2|Cope|Dync1li1	-1.5
D16	GO Biological Processes	19	GO:1903531	negative regulation of secretion by cell	19_GO:0048519 negative regulation of biological process	-2	3.4	3.2	20504	170	215	6	2.8	1.1	14265|14678|16859|16952|18641|269951	Fmr1|Gnai2|Lgals9|Anxa1|Pfkl|Idh2	-1.5
D16	GO Biological Processes	19	GO:1903829	positive regulation of cellular protein localization	19_GO:0051179 localization	-2	2.7	3	20504	278	215	8	3.7	1.3	12464|12534|15387|18759|22042|30877|57320|70572	Cct4|Cdk1|Hnrnpk|Prkci|Tfrc|Gnl3|Park7|Ipo5	-1.5
D16	Reactome Gene Sets	6	R-MMU-983231	Factors involved in megakaryocyte development and platelet production		-2	3.9	3.3	20504	122	215	5	2.3	1	13660|22145|22152|26934|71819	Ehd1|Tuba4a|Tubb3|Racgap1|Kif23	-1.5
D16	GO Molecular Functions	21	GO:0005506	iron ion binding		-2	3.3	3.2	20504	171	215	6	2.8	1.1	12317|18451|18452|18822|26432|26433	Calr|P4ha1|P4ha2|Plod1|Plod2|Plod3	-1.5
D16	GO Biological Processes	19	GO:0071897	DNA biosynthetic process	19_GO:0008152 metabolic process	-2	3.3	3.2	20504	171	215	6	2.8	1.1	11991|12464|16881|53379|67459|68275	Hnrnpd|Cct4|Lig1|Hnrnpa2b1|Nvl|Rpa1	-1.5
D16	GO Biological Processes	19	GO:0140014	mitotic nuclear division	19_GO:0009987 cellular process	-2	2.7	3	20504	279	215	8	3.7	1.3	18817|26914|26934|54392|68298|71819|235661|268697	Plk1|Macroh2a1|Racgap1|Ncapg|Ncapd2|Kif23|Dync1li1|Ccnb1	-1.5
D16	KEGG Pathway	24	mmu00620	Pyruvate metabolism		-2	6.8	3.9	20504	42	215	3	1.4	0.8	16828|18746|68263	Ldha|Pkm|Pdhb	-1.5
D16	Reactome Gene Sets	6	R-MMU-1566948	Elastic fibre formation		-2	6.8	3.9	20504	42	215	3	1.4	0.8	14118|14119|14268	Fbn1|Fbn2|Fn1	-1.5
D16	Reactome Gene Sets	6	R-MMU-157858	Gap junction trafficking and regulation		-2	6.8	3.9	20504	42	215	3	1.4	0.8	11773|22145|22152	Ap2m1|Tuba4a|Tubb3	-1.5
D16	GO Biological Processes	19	GO:0071174	mitotic spindle checkpoint signaling	19_GO:0048519 negative regulation of biological process	-2	6.8	3.9	20504	42	215	3	1.4	0.8	18817|235661|268697	Plk1|Dync1li1|Ccnb1	-1.5
D16	GO Biological Processes	19	GO:0045841	negative regulation of mitotic metaphase/anaphase transition	19_GO:0048519 negative regulation of biological process	-2	6.8	3.9	20504	42	215	3	1.4	0.8	18817|235661|268697	Plk1|Dync1li1|Ccnb1	-1.5
D16	GO Biological Processes	19	GO:0018105	peptidyl-serine phosphorylation	19_GO:0008152 metabolic process	-2	2.5	2.9	20504	340	215	9	4.2	1.4	12534|15364|18759|18817|21969|22042|57320|208643|268697	Cdk1|Hmga2|Prkci|Plk1|Top1|Tfrc|Park7|Eif4g1|Ccnb1	-1.5
D16	GO Biological Processes	19	GO:0032204	regulation of telomere maintenance	19_GO:0008152 metabolic process	-2	4.8	3.5	20504	80	215	4	1.9	0.92	11991|12464|30877|53379	Hnrnpd|Cct4|Gnl3|Hnrnpa2b1	-1.5
D16	Reactome Gene Sets	6	R-MMU-70326	Glucose metabolism		-2	4.8	3.5	20504	80	215	4	1.9	0.92	14433|15277|18641|18746	Gapdh|Hk2|Pfkl|Pkm	-1.5
D16_MCODE_ALL	Reactome Gene Sets	6	R-MMU-1650814	Collagen biosynthesis and modifying enzymes		-33	69	38	20504	60	104	21	20	3.9	12406|12814|12819|12822|12825|12826|12827|12831|12832|12833|12834|12842|12843|18451|18452|18453|18822|19035|26432|26433|234407	Serpinh1|Col11a1|Col15a1|Col18a1|Col3a1|Col4a1|Col4a2|Col5a1|Col5a2|Col6a1|Col6a2|Col1a1|Col1a2|P4ha1|P4ha2|P4hb|Plod1|Ppib|Plod2|Plod3|Colgalt1	-31
D16_MCODE_ALL	Reactome Gene Sets	6	R-MMU-1474290	Collagen formation		-30	51	32	20504	81	104	21	20	3.9	12406|12814|12819|12822|12825|12826|12827|12831|12832|12833|12834|12842|12843|18451|18452|18453|18822|19035|26432|26433|234407	Serpinh1|Col11a1|Col15a1|Col18a1|Col3a1|Col4a1|Col4a2|Col5a1|Col5a2|Col6a1|Col6a2|Col1a1|Col1a2|P4ha1|P4ha2|P4hb|Plod1|Ppib|Plod2|Plod3|Colgalt1	-28
D16_MCODE_ALL	Reactome Gene Sets	6	R-MMU-1474244	Extracellular matrix organization		-25	19	21	20504	256	104	25	24	4.2	12406|12814|12819|12822|12825|12826|12827|12831|12832|12833|12834|12842|12843|14118|14161|14268|18451|18452|18453|18822|19035|26432|26433|99571|234407	Serpinh1|Col11a1|Col15a1|Col18a1|Col3a1|Col4a1|Col4a2|Col5a1|Col5a2|Col6a1|Col6a2|Col1a1|Col1a2|Fbn1|Fga|Fn1|P4ha1|P4ha2|P4hb|Plod1|Ppib|Plod2|Plod3|Fgg|Colgalt1	-23
D16_MCODE_ALL	GO Molecular Functions	21	GO:0030020	extracellular matrix structural constituent conferring tensile strength		-20	67	29	20504	38	104	13	12	3.2	12814|12819|12822|12825|12826|12827|12831|12832|12833|12834|12835|12842|12843	Col11a1|Col15a1|Col18a1|Col3a1|Col4a1|Col4a2|Col5a1|Col5a2|Col6a1|Col6a2|Col6a3|Col1a1|Col1a2	-19
D16_MCODE_ALL	GO Molecular Functions	21	GO:0005201	extracellular matrix structural constituent		-19	24	20	20504	149	104	18	17	3.7	12814|12819|12822|12825|12826|12827|12831|12832|12833|12834|12835|12842|12843|14118|14161|14268|99571|226519	Col11a1|Col15a1|Col18a1|Col3a1|Col4a1|Col4a2|Col5a1|Col5a2|Col6a1|Col6a2|Col6a3|Col1a1|Col1a2|Fbn1|Fga|Fn1|Fgg|Lamc1	-17
D16_MCODE_ALL	GO Biological Processes	19	GO:0034660	ncRNA metabolic process	19_GO:0008152 metabolic process	-18	11	15	20504	456	104	25	24	4.2	20044|20085|28114|53379|53414|64934|66229|67755|69237|69663|70223|71990|72515|72554|74778|75416|104458|105148|107045|107071|216443|217995|223499|234374|353172	Rps14|Rps19|Nsun2|Hnrnpa2b1|Bysl|Pes1|Rpl7l1|Ddx47|Gtpbp4|Ddx51|Nars|Ddx54|Wdr43|Utp14a|Rrp7a|Nop14|Rars|Iars|Lars|Wdr74|Mars1|Heatr1|Dcaf13|Ddx49|Gars	-17
D16_MCODE_ALL	Reactome Gene Sets	6	R-MMU-216083	Integrin cell surface interactions		-18	39	23	20504	70	104	14	13	3.3	12822|12825|12826|12827|12831|12832|12833|12834|12842|12843|14118|14161|14268|99571	Col18a1|Col3a1|Col4a1|Col4a2|Col5a1|Col5a2|Col6a1|Col6a2|Col1a1|Col1a2|Fbn1|Fga|Fn1|Fgg	-16
D16_MCODE_ALL	Reactome Gene Sets	6	R-MMU-8948216	Collagen chain trimerization		-18	59	26	20504	40	104	12	12	3.1	12814|12819|12822|12825|12826|12827|12831|12832|12833|12834|12842|12843	Col11a1|Col15a1|Col18a1|Col3a1|Col4a1|Col4a2|Col5a1|Col5a2|Col6a1|Col6a2|Col1a1|Col1a2	-16
D16_MCODE_ALL	Reactome Gene Sets	6	R-MMU-1442490	Collagen degradation		-17	53	25	20504	45	104	12	12	3.1	12814|12819|12822|12825|12826|12827|12831|12832|12833|12834|12842|12843	Col11a1|Col15a1|Col18a1|Col3a1|Col4a1|Col4a2|Col5a1|Col5a2|Col6a1|Col6a2|Col1a1|Col1a2	-16
D16_MCODE_ALL	Reactome Gene Sets	6	R-MMU-2022090	Assembly of collagen fibrils and other multimeric structures		-16	42	22	20504	56	104	12	12	3.1	12814|12819|12822|12825|12826|12827|12831|12832|12833|12834|12842|12843	Col11a1|Col15a1|Col18a1|Col3a1|Col4a1|Col4a2|Col5a1|Col5a2|Col6a1|Col6a2|Col1a1|Col1a2	-14
D16_MCODE_ALL	GO Molecular Functions	21	GO:0005198	structural molecule activity		-16	8.4	13	20504	585	104	25	24	4.2	12814|12819|12822|12825|12826|12827|12831|12832|12833|12834|12835|12842|12843|12847|14118|14161|14268|20044|20085|50797|59042|66229|99571|226519|267019	Col11a1|Col15a1|Col18a1|Col3a1|Col4a1|Col4a2|Col5a1|Col5a2|Col6a1|Col6a2|Col6a3|Col1a1|Col1a2|Copa|Fbn1|Fga|Fn1|Rps14|Rps19|Copb2|Cope|Rpl7l1|Fgg|Lamc1|Rps15a	-14
D16_MCODE_ALL	GO Biological Processes	19	GO:0006364	rRNA processing	19_GO:0008152 metabolic process	-15	16	15	20504	214	104	17	16	3.6	20044|20085|53414|64934|66229|67755|69237|69663|71990|72515|72554|74778|75416|107071|217995|223499|234374	Rps14|Rps19|Bysl|Pes1|Rpl7l1|Ddx47|Gtpbp4|Ddx51|Ddx54|Wdr43|Utp14a|Rrp7a|Nop14|Wdr74|Heatr1|Dcaf13|Ddx49	-13
D16_MCODE_ALL	KEGG Pathway	24	ko04974	Protein digestion and absorption		-15	28	19	20504	90	104	13	12	3.2	12814|12819|12822|12825|12826|12827|12831|12832|12833|12834|12835|12842|12843	Col11a1|Col15a1|Col18a1|Col3a1|Col4a1|Col4a2|Col5a1|Col5a2|Col6a1|Col6a2|Col6a3|Col1a1|Col1a2	-13
D16_MCODE_ALL	Reactome Gene Sets	6	R-MMU-1474228	Degradation of the extracellular matrix		-15	23	17	20504	119	104	14	13	3.3	12814|12819|12822|12825|12826|12827|12831|12832|12833|12834|12842|12843|14118|14268	Col11a1|Col15a1|Col18a1|Col3a1|Col4a1|Col4a2|Col5a1|Col5a2|Col6a1|Col6a2|Col1a1|Col1a2|Fbn1|Fn1	-13
D16_MCODE_ALL	KEGG Pathway	24	mmu04974	Protein digestion and absorption		-15	28	18	20504	93	104	13	12	3.2	12814|12819|12822|12825|12826|12827|12831|12832|12833|12834|12835|12842|12843	Col11a1|Col15a1|Col18a1|Col3a1|Col4a1|Col4a2|Col5a1|Col5a2|Col6a1|Col6a2|Col6a3|Col1a1|Col1a2	-13
D16_MCODE_ALL	GO Biological Processes	19	GO:0016072	rRNA metabolic process	19_GO:0008152 metabolic process	-15	15	15	20504	224	104	17	16	3.6	20044|20085|53414|64934|66229|67755|69237|69663|71990|72515|72554|74778|75416|107071|217995|223499|234374	Rps14|Rps19|Bysl|Pes1|Rpl7l1|Ddx47|Gtpbp4|Ddx51|Ddx54|Wdr43|Utp14a|Rrp7a|Nop14|Wdr74|Heatr1|Dcaf13|Ddx49	-13
D16_MCODE_ALL	GO Biological Processes	19	GO:0022613	ribonucleoprotein complex biogenesis	19_GO:0009987 cellular process	-15	10	13	20504	412	104	21	20	3.9	13669|20044|20085|53414|55944|64934|66229|67755|68879|69237|69663|71990|72515|72554|74778|75416|107071|217995|223499|229317|234374	Eif3a|Rps14|Rps19|Bysl|Eif3d|Pes1|Rpl7l1|Ddx47|Prpf6|Gtpbp4|Ddx51|Ddx54|Wdr43|Utp14a|Rrp7a|Nop14|Wdr74|Heatr1|Dcaf13|Eif2a|Ddx49	-13
D16_MCODE_ALL	Reactome Gene Sets	6	R-MMU-8953854	Metabolism of RNA		-14	8.3	12	20504	546	104	23	22	4.1	11991|15387|20044|20085|30877|53379|53414|59013|64934|66055|67755|68879|72515|72554|74326|74351|74778|75416|208643|217995|223499|234374|267019	Hnrnpd|Hnrnpk|Rps14|Rps19|Gnl3|Hnrnpa2b1|Bysl|Hnrnph1|Pes1|Sf3b6|Ddx47|Prpf6|Wdr43|Utp14a|Hnrnpr|Ddx23|Rrp7a|Nop14|Eif4g1|Heatr1|Dcaf13|Ddx49|Rps15a	-13
D16_MCODE_ALL	GO Biological Processes	19	GO:0042254	ribosome biogenesis	19_GO:0009987 cellular process	-14	12	14	20504	296	104	18	17	3.7	20044|20085|53414|64934|66229|67755|69237|69663|71990|72515|72554|74778|75416|107071|217995|223499|229317|234374	Rps14|Rps19|Bysl|Pes1|Rpl7l1|Ddx47|Gtpbp4|Ddx51|Ddx54|Wdr43|Utp14a|Rrp7a|Nop14|Wdr74|Heatr1|Dcaf13|Eif2a|Ddx49	-12
D16_MCODE_ALL	GO Biological Processes	19	GO:0034470	ncRNA processing	19_GO:0008152 metabolic process	-14	10	13	20504	362	104	19	18	3.8	20044|20085|28114|53379|53414|64934|66229|67755|69237|69663|71990|72515|72554|74778|75416|107071|217995|223499|234374	Rps14|Rps19|Nsun2|Hnrnpa2b1|Bysl|Pes1|Rpl7l1|Ddx47|Gtpbp4|Ddx51|Ddx54|Wdr43|Utp14a|Rrp7a|Nop14|Wdr74|Heatr1|Dcaf13|Ddx49	-12
D16_MCODE_ALL	Reactome Gene Sets	6	R-MMU-8868773	rRNA processing in the nucleus and cytosol		-13	16	14	20504	171	104	14	13	3.3	20044|20085|30877|53414|64934|67755|72515|72554|74778|75416|217995|223499|234374|267019	Rps14|Rps19|Gnl3|Bysl|Pes1|Ddx47|Wdr43|Utp14a|Rrp7a|Nop14|Heatr1|Dcaf13|Ddx49|Rps15a	-11
D16_MCODE_ALL	Reactome Gene Sets	6	R-MMU-72312	rRNA processing		-13	16	14	20504	171	104	14	13	3.3	20044|20085|30877|53414|64934|67755|72515|72554|74778|75416|217995|223499|234374|267019	Rps14|Rps19|Gnl3|Bysl|Pes1|Ddx47|Wdr43|Utp14a|Rrp7a|Nop14|Heatr1|Dcaf13|Ddx49|Rps15a	-11
D16_MCODE_ALL	Reactome Gene Sets	6	R-MMU-6791226	Major pathway of rRNA processing in the nucleolus and cytosol		-13	16	14	20504	171	104	14	13	3.3	20044|20085|30877|53414|64934|67755|72515|72554|74778|75416|217995|223499|234374|267019	Rps14|Rps19|Gnl3|Bysl|Pes1|Ddx47|Wdr43|Utp14a|Rrp7a|Nop14|Heatr1|Dcaf13|Ddx49|Rps15a	-11
D16_MCODE_ALL	Reactome Gene Sets	6	R-MMU-3000171	Non-integrin membrane-ECM interactions		-13	47	20	20504	38	104	9	8.7	2.8	12814|12825|12826|12827|12831|12832|12842|12843|14268	Col11a1|Col3a1|Col4a1|Col4a2|Col5a1|Col5a2|Col1a1|Col1a2|Fn1	-11
D16_MCODE_ALL	Reactome Gene Sets	6	R-MMU-72649	Translation initiation complex formation		-13	35	18	20504	57	104	10	9.6	2.9	13669|16341|20044|20085|27979|55944|56347|208643|223691|267019	Eif3a|Eif3e|Rps14|Rps19|Eif3b|Eif3d|Eif3c|Eif4g1|Eif3l|Rps15a	-11
D16_MCODE_ALL	Reactome Gene Sets	6	R-MMU-72702	Ribosomal scanning and start codon recognition		-13	35	18	20504	57	104	10	9.6	2.9	13669|16341|20044|20085|27979|55944|56347|208643|223691|267019	Eif3a|Eif3e|Rps14|Rps19|Eif3b|Eif3d|Eif3c|Eif4g1|Eif3l|Rps15a	-11
D16_MCODE_ALL	Reactome Gene Sets	6	R-MMU-72662	Activation of the mRNA upon binding of the cap-binding complex and eIFs, and subsequent binding to 43S		-13	34	18	20504	58	104	10	9.6	2.9	13669|16341|20044|20085|27979|55944|56347|208643|223691|267019	Eif3a|Eif3e|Rps14|Rps19|Eif3b|Eif3d|Eif3c|Eif4g1|Eif3l|Rps15a	-11
D16_MCODE_ALL	GO Biological Processes	19	GO:0030199	collagen fibril organization	19_GO:0009987 cellular process	-12	33	18	20504	59	104	10	9.6	2.9	12406|12814|12825|12831|12832|12842|12843|18451|26433|234407	Serpinh1|Col11a1|Col3a1|Col5a1|Col5a2|Col1a1|Col1a2|P4ha1|Plod3|Colgalt1	-11
D16_MCODE_ALL	Reactome Gene Sets	6	R-MMU-72695	Formation of the ternary complex, and subsequently, the 43S complex		-11	35	17	20504	50	104	9	8.7	2.8	13669|16341|20044|20085|27979|55944|56347|223691|267019	Eif3a|Eif3e|Rps14|Rps19|Eif3b|Eif3d|Eif3c|Eif3l|Rps15a	-9.9
D16_MCODE_ALL	Reactome Gene Sets	6	R-MMU-419037	NCAM1 interactions		-11	73	22	20504	19	104	7	6.7	2.5	12825|12826|12827|12831|12832|12833|12834	Col3a1|Col4a1|Col4a2|Col5a1|Col5a2|Col6a1|Col6a2	-9.9
D16_MCODE_ALL	GO Molecular Functions	21	GO:0003729	mRNA binding		-11	9.2	11	20504	366	104	17	16	3.6	11991|12847|13669|14265|15387|19205|20044|23881|30877|52874|53379|55944|57320|66055|74326|208643|229317	Hnrnpd|Copa|Eif3a|Fmr1|Hnrnpk|Ptbp1|Rps14|G3bp2|Gnl3|Pum3|Hnrnpa2b1|Eif3d|Park7|Sf3b6|Hnrnpr|Eif4g1|Eif2a	-9.8
D16_MCODE_ALL	GO Biological Processes	19	GO:0030198	extracellular matrix organization	19_GO:0009987 cellular process	-11	10	12	20504	312	104	16	15	3.5	12406|12814|12819|12822|12825|12826|12827|12831|12832|12842|12843|14268|18451|26433|226519|234407	Serpinh1|Col11a1|Col15a1|Col18a1|Col3a1|Col4a1|Col4a2|Col5a1|Col5a2|Col1a1|Col1a2|Fn1|P4ha1|Plod3|Lamc1|Colgalt1	-9.8
D16_MCODE_ALL	GO Biological Processes	19	GO:0043062	extracellular structure organization	19_GO:0009987 cellular process	-11	10	12	20504	313	104	16	15	3.5	12406|12814|12819|12822|12825|12826|12827|12831|12832|12842|12843|14268|18451|26433|226519|234407	Serpinh1|Col11a1|Col15a1|Col18a1|Col3a1|Col4a1|Col4a2|Col5a1|Col5a2|Col1a1|Col1a2|Fn1|P4ha1|Plod3|Lamc1|Colgalt1	-9.8
D16_MCODE_ALL	GO Biological Processes	19	GO:0045229	external encapsulating structure organization	19_GO:0009987 cellular process	-11	10	12	20504	314	104	16	15	3.5	12406|12814|12819|12822|12825|12826|12827|12831|12832|12842|12843|14268|18451|26433|226519|234407	Serpinh1|Col11a1|Col15a1|Col18a1|Col3a1|Col4a1|Col4a2|Col5a1|Col5a2|Col1a1|Col1a2|Fn1|P4ha1|Plod3|Lamc1|Colgalt1	-9.8
D16_MCODE_ALL	GO Molecular Functions	21	GO:0048407	platelet-derived growth factor binding		-11	99	24	20504	12	104	6	5.8	2.3	12825|12826|12831|12833|12842|12843	Col3a1|Col4a1|Col5a1|Col6a1|Col1a1|Col1a2	-9.4
D16_MCODE_ALL	GO Biological Processes	19	GO:0006412	translation	19_GO:0008152 metabolic process	-11	6.1	9.7	20504	677	104	21	20	3.9	11991|13669|14265|16341|20044|20085|27979|52874|55944|56347|68015|70223|74326|104458|105148|107045|208643|216443|223691|229317|353172	Hnrnpd|Eif3a|Fmr1|Eif3e|Rps14|Rps19|Eif3b|Pum3|Eif3d|Eif3c|Trap1|Nars|Hnrnpr|Rars|Iars|Lars|Eif4g1|Mars1|Eif3l|Eif2a|Gars	-9.2
D16_MCODE_ALL	GO Biological Processes	19	GO:0043043	peptide biosynthetic process	19_GO:0008152 metabolic process	-10	5.9	9.4	20504	701	104	21	20	3.9	11991|13669|14265|16341|20044|20085|27979|52874|55944|56347|68015|70223|74326|104458|105148|107045|208643|216443|223691|229317|353172	Hnrnpd|Eif3a|Fmr1|Eif3e|Rps14|Rps19|Eif3b|Pum3|Eif3d|Eif3c|Trap1|Nars|Hnrnpr|Rars|Iars|Lars|Eif4g1|Mars1|Eif3l|Eif2a|Gars	-8.9
D16_MCODE_ALL	Reactome Gene Sets	6	R-MMU-3000178	ECM proteoglycans		-10	36	17	20504	44	104	8	7.7	2.6	12825|12831|12832|12833|12834|12842|12843|14268	Col3a1|Col5a1|Col5a2|Col6a1|Col6a2|Col1a1|Col1a2|Fn1	-8.9
D16_MCODE_ALL	Reactome Gene Sets	6	R-MMU-8874081	MET activates PTK2 signaling		-10	51	19	20504	27	104	7	6.7	2.5	12814|12825|12831|12832|12842|12843|14268	Col11a1|Col3a1|Col5a1|Col5a2|Col1a1|Col1a2|Fn1	-8.8
D16_MCODE_ALL	Reactome Gene Sets	6	R-MMU-156827	L13a-mediated translational silencing of Ceruloplasmin expression		-9.8	18	13	20504	107	104	10	9.6	2.9	13669|16341|20044|20085|27979|55944|56347|208643|223691|267019	Eif3a|Eif3e|Rps14|Rps19|Eif3b|Eif3d|Eif3c|Eif4g1|Eif3l|Rps15a	-8.4
D16_MCODE_ALL	Reactome Gene Sets	6	R-MMU-72706	GTP hydrolysis and joining of the 60S ribosomal subunit		-9.7	18	13	20504	108	104	10	9.6	2.9	13669|16341|20044|20085|27979|55944|56347|208643|223691|267019	Eif3a|Eif3e|Rps14|Rps19|Eif3b|Eif3d|Eif3c|Eif4g1|Eif3l|Rps15a	-8.3
D16_MCODE_ALL	Reactome Gene Sets	6	R-MMU-375165	NCAM signaling for neurite out-growth		-9.5	41	16	20504	34	104	7	6.7	2.5	12825|12826|12827|12831|12832|12833|12834	Col3a1|Col4a1|Col4a2|Col5a1|Col5a2|Col6a1|Col6a2	-8.1
D16_MCODE_ALL	Reactome Gene Sets	6	R-MMU-72737	Cap-dependent Translation Initiation		-9.5	17	12	20504	115	104	10	9.6	2.9	13669|16341|20044|20085|27979|55944|56347|208643|223691|267019	Eif3a|Eif3e|Rps14|Rps19|Eif3b|Eif3d|Eif3c|Eif4g1|Eif3l|Rps15a	-8.1
D16_MCODE_ALL	Reactome Gene Sets	6	R-MMU-72613	Eukaryotic Translation Initiation		-9.5	17	12	20504	115	104	10	9.6	2.9	13669|16341|20044|20085|27979|55944|56347|208643|223691|267019	Eif3a|Eif3e|Rps14|Rps19|Eif3b|Eif3d|Eif3c|Eif4g1|Eif3l|Rps15a	-8.1
D16_MCODE_ALL	KEGG Pathway	24	ko04512	ECM-receptor interaction		-9.4	21	13	20504	83	104	9	8.7	2.8	12826|12827|12833|12834|12835|12842|12843|14268|226519	Col4a1|Col4a2|Col6a1|Col6a2|Col6a3|Col1a1|Col1a2|Fn1|Lamc1	-8.1
D16_MCODE_ALL	GO Molecular Functions	21	GO:0031492	nucleosomal DNA binding		-9.4	62	19	20504	19	104	6	5.8	2.3	14958|15364|26914|50708|50709|56702	H1f0|Hmga2|Macroh2a1|H1f2|H1f4|H1f5	-8.1
D16_MCODE_ALL	KEGG Pathway	24	mmu04512	ECM-receptor interaction		-9.3	21	13	20504	85	104	9	8.7	2.8	12826|12827|12833|12834|12835|12842|12843|14268|226519	Col4a1|Col4a2|Col6a1|Col6a2|Col6a3|Col1a1|Col1a2|Fn1|Lamc1	-8
D16_MCODE_ALL	Reactome Gene Sets	6	R-MMU-8875878	MET promotes cell motility		-9.2	37	16	20504	37	104	7	6.7	2.5	12814|12825|12831|12832|12842|12843|14268	Col11a1|Col3a1|Col5a1|Col5a2|Col1a1|Col1a2|Fn1	-7.8
D16_MCODE_ALL	GO Molecular Functions	21	GO:0003743	translation initiation factor activity		-9.1	26	14	20504	61	104	8	7.7	2.6	13669|16341|27979|55944|56347|208643|223691|229317	Eif3a|Eif3e|Eif3b|Eif3d|Eif3c|Eif4g1|Eif3l|Eif2a	-7.8
D16_MCODE_ALL	Reactome Gene Sets	6	R-MMU-72689	Formation of a pool of free 40S subunits		-8.8	18	12	20504	97	104	9	8.7	2.8	13669|16341|20044|20085|27979|55944|56347|223691|267019	Eif3a|Eif3e|Rps14|Rps19|Eif3b|Eif3d|Eif3c|Eif3l|Rps15a	-7.5
D16_MCODE_ALL	WikiPathways	27	WP85	Focal adhesion		-8.6	12	10	20504	185	104	11	11	3	12814|12825|12826|12827|12831|12832|12834|12842|12843|14268|226519	Col11a1|Col3a1|Col4a1|Col4a2|Col5a1|Col5a2|Col6a2|Col1a1|Col1a2|Fn1|Lamc1	-7.3
D16_MCODE_ALL	GO Molecular Functions	21	GO:0045182	translation regulator activity		-8.6	14	11	20504	141	104	10	9.6	2.9	13669|14265|16341|20044|27979|55944|56347|208643|223691|229317	Eif3a|Fmr1|Eif3e|Rps14|Eif3b|Eif3d|Eif3c|Eif4g1|Eif3l|Eif2a	-7.3
D16_MCODE_ALL	GO Biological Processes	19	GO:0075525	viral translational termination-reinitiation	19_GO:0016032 viral process	-8.5	160	25	20504	5	104	4	3.8	1.9	13669|27979|55944|223691	Eif3a|Eif3b|Eif3d|Eif3l	-7.2
D16_MCODE_ALL	GO Biological Processes	19	GO:0018126	protein hydroxylation	19_GO:0008152 metabolic process	-8.3	42	16	20504	28	104	6	5.8	2.3	18451|18452|18453|18822|26432|26433	P4ha1|P4ha2|P4hb|Plod1|Plod2|Plod3	-7
D16_MCODE_ALL	GO Molecular Functions	21	GO:0031491	nucleosome binding		-8.2	28	13	20504	50	104	7	6.7	2.5	14958|15364|18140|26914|50708|50709|56702	H1f0|Hmga2|Uhrf1|Macroh2a1|H1f2|H1f4|H1f5	-7
D16_MCODE_ALL	Reactome Gene Sets	6	R-MMU-186797	Signaling by PDGF		-8	26	13	20504	53	104	7	6.7	2.5	12825|12826|12827|12831|12832|12833|12834	Col3a1|Col4a1|Col4a2|Col5a1|Col5a2|Col6a1|Col6a2	-6.8
D16_MCODE_ALL	WikiPathways	27	WP310	mRNA processing		-8	6.5	8.5	20504	453	104	15	14	3.4	11991|14265|15384|15387|19205|20044|27979|50926|52874|53379|57320|59013|66055|68879|74326	Hnrnpd|Fmr1|Hnrnpab|Hnrnpk|Ptbp1|Rps14|Eif3b|Hnrnpdl|Pum3|Hnrnpa2b1|Park7|Hnrnph1|Sf3b6|Prpf6|Hnrnpr	-6.8
D16_MCODE_ALL	GO Biological Processes	19	GO:0006413	translational initiation	19_GO:0008152 metabolic process	-8	15	11	20504	119	104	9	8.7	2.8	13669|14265|16341|27979|55944|56347|208643|223691|229317	Eif3a|Fmr1|Eif3e|Eif3b|Eif3d|Eif3c|Eif4g1|Eif3l|Eif2a	-6.8
D16_MCODE_ALL	GO Biological Processes	19	GO:0019081	viral translation	19_GO:0016032 viral process	-7.7	58	17	20504	17	104	5	4.8	2.1	13669|19205|27979|55944|223691	Eif3a|Ptbp1|Eif3b|Eif3d|Eif3l	-6.5
D16_MCODE_ALL	GO Molecular Functions	21	GO:0008135	translation factor activity, RNA binding		-7.7	18	11	20504	90	104	8	7.7	2.6	13669|16341|27979|55944|56347|208643|223691|229317	Eif3a|Eif3e|Eif3b|Eif3d|Eif3c|Eif4g1|Eif3l|Eif2a	-6.5
D16_MCODE_ALL	GO Biological Processes	19	GO:1902416	positive regulation of mRNA binding	19_GO:0065007 biological regulation	-7.7	110	21	20504	7	104	4	3.8	1.9	14265|16341|55944|208643	Fmr1|Eif3e|Eif3d|Eif4g1	-6.5
D16_MCODE_ALL	GO Molecular Functions	21	GO:0016706	2-oxoglutarate-dependent dioxygenase activity		-7.6	22	12	20504	62	104	7	6.7	2.5	16468|18451|18452|18453|18822|26432|26433	Jarid2|P4ha1|P4ha2|P4hb|Plod1|Plod2|Plod3	-6.4
D16_MCODE_ALL	GO Molecular Functions	21	GO:0031418	L-ascorbic acid binding		-7.5	52	16	20504	19	104	5	4.8	2.1	18451|18452|18822|26432|26433	P4ha1|P4ha2|Plod1|Plod2|Plod3	-6.3
D16_MCODE_ALL	KEGG Functional Sets	26	M00359	Aminoacyl-tRNA biosynthesis, eukaryotes		-7.4	31	13	20504	38	104	6	5.8	2.3	70223|104458|105148|107045|216443|353172	Nars|Rars|Iars|Lars|Mars1|Gars	-6.3
D16_MCODE_ALL	KEGG Functional Sets	26	mmu_M00359	Aminoacyl-tRNA biosynthesis, eukaryotes		-7.4	31	13	20504	38	104	6	5.8	2.3	70223|104458|105148|107045|216443|353172	Nars|Rars|Iars|Lars|Mars1|Gars	-6.3
D16_MCODE_ALL	GO Biological Processes	19	GO:1905216	positive regulation of RNA binding	19_GO:0065007 biological regulation	-7.4	99	20	20504	8	104	4	3.8	1.9	14265|16341|55944|208643	Fmr1|Eif3e|Eif3d|Eif4g1	-6.2
D16_MCODE_ALL	GO Biological Processes	19	GO:0006418	tRNA aminoacylation for protein translation	19_GO:0008152 metabolic process	-7.3	30	13	20504	40	104	6	5.8	2.3	70223|104458|105148|107045|216443|353172	Nars|Rars|Iars|Lars|Mars1|Gars	-6.1
D16_MCODE_ALL	GO Molecular Functions	21	GO:0016875	ligase activity, forming carbon-oxygen bonds		-7.2	29	13	20504	41	104	6	5.8	2.3	70223|104458|105148|107045|216443|353172	Nars|Rars|Iars|Lars|Mars1|Gars	-6.1
D16_MCODE_ALL	GO Molecular Functions	21	GO:0004812	aminoacyl-tRNA ligase activity		-7.2	29	13	20504	41	104	6	5.8	2.3	70223|104458|105148|107045|216443|353172	Nars|Rars|Iars|Lars|Mars1|Gars	-6.1
D16_MCODE_ALL	GO Biological Processes	19	GO:0043039	tRNA aminoacylation	19_GO:0008152 metabolic process	-7.1	28	12	20504	43	104	6	5.8	2.3	70223|104458|105148|107045|216443|353172	Nars|Rars|Iars|Lars|Mars1|Gars	-6
D16_MCODE_ALL	GO Molecular Functions	21	GO:0090079	translation regulator activity, nucleic acid binding		-7.1	15	10	20504	108	104	8	7.7	2.6	13669|16341|27979|55944|56347|208643|223691|229317	Eif3a|Eif3e|Eif3b|Eif3d|Eif3c|Eif4g1|Eif3l|Eif2a	-6
D16_MCODE_ALL	GO Biological Processes	19	GO:0006520	cellular amino acid metabolic process	19_GO:0008152 metabolic process	-7.1	8.4	8.6	20504	257	104	11	11	3	26432|26433|27053|57320|69719|70223|104458|105148|107045|216443|353172	Plod2|Plod3|Asns|Park7|Cad|Nars|Rars|Iars|Lars|Mars1|Gars	-6
D16_MCODE_ALL	GO Biological Processes	19	GO:0042274	ribosomal small subunit biogenesis	19_GO:0009987 cellular process	-7.1	19	11	20504	72	104	7	6.7	2.5	20044|20085|53414|74778|75416|217995|223499	Rps14|Rps19|Bysl|Rrp7a|Nop14|Heatr1|Dcaf13	-6
D16_MCODE_ALL	Reactome Gene Sets	6	R-MMU-6806834	Signaling by MET		-7.1	19	11	20504	73	104	7	6.7	2.5	12814|12825|12831|12832|12842|12843|14268	Col11a1|Col3a1|Col5a1|Col5a2|Col1a1|Col1a2|Fn1	-5.9
D16_MCODE_ALL	GO Biological Processes	19	GO:0043038	amino acid activation	19_GO:0008152 metabolic process	-7.1	27	12	20504	44	104	6	5.8	2.3	70223|104458|105148|107045|216443|353172	Nars|Rars|Iars|Lars|Mars1|Gars	-5.9
D16_MCODE_ALL	GO Molecular Functions	21	GO:0008475	procollagen-lysine 5-dioxygenase activity		-6.9	200	24	20504	3	104	3	2.9	1.6	18822|26432|26433	Plod1|Plod2|Plod3	-5.8
D16_MCODE_ALL	GO Biological Processes	19	GO:1902415	regulation of mRNA binding	19_GO:0065007 biological regulation	-6.9	79	18	20504	10	104	4	3.8	1.9	14265|16341|55944|208643	Fmr1|Eif3e|Eif3d|Eif4g1	-5.8
D16_MCODE_ALL	WikiPathways	27	WP307	Translation factors		-6.8	24	12	20504	49	104	6	5.8	2.3	13669|16341|27979|55944|56347|208643	Eif3a|Eif3e|Eif3b|Eif3d|Eif3c|Eif4g1	-5.6
D16_MCODE_ALL	GO Biological Processes	19	GO:0030490	maturation of SSU-rRNA	19_GO:0008152 metabolic process	-6.8	24	12	20504	49	104	6	5.8	2.3	20044|20085|53414|75416|217995|223499	Rps14|Rps19|Bysl|Nop14|Heatr1|Dcaf13	-5.6
D16_MCODE_ALL	Reactome Gene Sets	6	R-MMU-72766	Translation		-6.7	9	8.5	20504	220	104	10	9.6	2.9	13669|16341|20044|20085|27979|55944|56347|208643|223691|267019	Eif3a|Eif3e|Rps14|Rps19|Eif3b|Eif3d|Eif3c|Eif4g1|Eif3l|Rps15a	-5.6
D16_MCODE_ALL	GO Molecular Functions	21	GO:0140640	catalytic activity, acting on a nucleic acid		-6.7	5.2	7.2	20504	573	104	15	14	3.4	13433|15364|19205|28114|67755|69663|70223|71990|74351|104458|105148|107045|216443|234374|353172	Dnmt1|Hmga2|Ptbp1|Nsun2|Ddx47|Ddx51|Nars|Ddx54|Ddx23|Rars|Iars|Lars|Mars1|Ddx49|Gars	-5.6
D16_MCODE_ALL	GO Biological Processes	19	GO:0075522	IRES-dependent viral translational initiation	19_GO:0016032 viral process	-6.5	66	16	20504	12	104	4	3.8	1.9	13669|19205|27979|55944	Eif3a|Ptbp1|Eif3b|Eif3d	-5.4
D16_MCODE_ALL	GO Biological Processes	19	GO:0035987	endodermal cell differentiation	19_GO:0032502 developmental process	-6.5	34	13	20504	29	104	5	4.8	2.1	12831|12832|14268|15364|26914	Col5a1|Col5a2|Fn1|Hmga2|Macroh2a1	-5.4
D16_MCODE_ALL	WikiPathways	27	WP458	Inflammatory response pathway		-6.4	33	12	20504	30	104	5	4.8	2.1	12825|12842|12843|14268|226519	Col3a1|Col1a1|Col1a2|Fn1|Lamc1	-5.3
D16_MCODE_ALL	GO Molecular Functions	21	GO:0140098	catalytic activity, acting on RNA		-6.4	6.3	7.4	20504	373	104	12	12	3.1	28114|67755|69663|70223|71990|74351|104458|105148|107045|216443|234374|353172	Nsun2|Ddx47|Ddx51|Nars|Ddx54|Ddx23|Rars|Iars|Lars|Mars1|Ddx49|Gars	-5.3
D16_MCODE_ALL	Reactome Gene Sets	6	R-MMU-2214320	Anchoring fibril formation		-6.4	61	15	20504	13	104	4	3.8	1.9	12826|12827|12842|12843	Col4a1|Col4a2|Col1a1|Col1a2	-5.3
D16_MCODE_ALL	GO Biological Processes	19	GO:1905214	regulation of RNA binding	19_GO:0065007 biological regulation	-6.4	61	15	20504	13	104	4	3.8	1.9	14265|16341|55944|208643	Fmr1|Eif3e|Eif3d|Eif4g1	-5.3
D16_MCODE_ALL	GO Molecular Functions	21	GO:0051213	dioxygenase activity		-6.3	15	9.5	20504	94	104	7	6.7	2.5	16468|18451|18452|18453|18822|26432|26433	Jarid2|P4ha1|P4ha2|P4hb|Plod1|Plod2|Plod3	-5.2
D16_MCODE_ALL	GO Molecular Functions	21	GO:0070815	peptidyl-lysine 5-dioxygenase activity		-6.3	150	21	20504	4	104	3	2.9	1.6	18822|26432|26433	Plod1|Plod2|Plod3	-5.2
D16_MCODE_ALL	WikiPathways	27	WP2841	Focal adhesion: PI3K-Akt-mTOR signaling pathway		-6.1	6.7	7.4	20504	322	104	11	11	3	12814|12825|12826|12827|12831|12832|12834|12842|12843|14268|226519	Col11a1|Col3a1|Col4a1|Col4a2|Col5a1|Col5a2|Col6a2|Col1a1|Col1a2|Fn1|Lamc1	-5.1
D16_MCODE_ALL	KEGG Pathway	24	ko04510	Focal adhesion		-6.1	8.9	8	20504	199	104	9	8.7	2.8	12826|12827|12833|12834|12835|12842|12843|14268|226519	Col4a1|Col4a2|Col6a1|Col6a2|Col6a3|Col1a1|Col1a2|Fn1|Lamc1	-5.1
D16_MCODE_ALL	GO Biological Processes	19	GO:0016584	nucleosome positioning	19_GO:0009987 cellular process	-6.1	53	14	20504	15	104	4	3.8	1.9	14958|50708|50709|56702	H1f0|H1f2|H1f4|H1f5	-5
D16_MCODE_ALL	GO Biological Processes	19	GO:0000462	maturation of SSU-rRNA from tricistronic rRNA transcript (SSU-rRNA, 5.8S rRNA, LSU-rRNA)	19_GO:0008152 metabolic process	-6.1	28	11	20504	35	104	5	4.8	2.1	20044|20085|53414|217995|223499	Rps14|Rps19|Bysl|Heatr1|Dcaf13	-5
D16_MCODE_ALL	KEGG Pathway	24	mmu04510	Focal adhesion		-6	8.7	7.9	20504	203	104	9	8.7	2.8	12826|12827|12833|12834|12835|12842|12843|14268|226519	Col4a1|Col4a2|Col6a1|Col6a2|Col6a3|Col1a1|Col1a2|Fn1|Lamc1	-5
D16_MCODE_ALL	GO Molecular Functions	21	GO:0043177	organic acid binding		-6	11	8.4	20504	150	104	8	7.7	2.6	18451|18452|18822|26432|26433|69719|104458|232087	P4ha1|P4ha2|Plod1|Plod2|Plod3|Cad|Rars|Mat2a	-5
D16_MCODE_ALL	Reactome Gene Sets	6	R-MMU-76009	Platelet Aggregation (Plug Formation)		-6	27	11	20504	36	104	5	4.8	2.1	12842|12843|14161|14268|99571	Col1a1|Col1a2|Fga|Fn1|Fgg	-5
D16_MCODE_ALL	Reactome Gene Sets	6	R-MMU-9006934	Signaling by Receptor Tyrosine Kinases		-6	5.8	7	20504	406	104	12	12	3.1	12814|12825|12826|12827|12831|12832|12833|12834|12842|12843|14268|59013	Col11a1|Col3a1|Col4a1|Col4a2|Col5a1|Col5a2|Col6a1|Col6a2|Col1a1|Col1a2|Fn1|Hnrnph1	-5
D16_MCODE_ALL	KEGG Pathway	24	ko00970	Aminoacyl-tRNA biosynthesis		-6	18	9.8	20504	66	104	6	5.8	2.3	70223|104458|105148|107045|216443|353172	Nars|Rars|Iars|Lars|Mars1|Gars	-4.9
D16_MCODE_ALL	Reactome Gene Sets	6	R-MMU-2559584	Formation of Senescence-Associated Heterochromatin Foci (SAHF)		-6	49	14	20504	16	104	4	3.8	1.9	14958|15364|50708|56702	H1f0|Hmga2|H1f2|H1f5	-4.9
D16_MCODE_ALL	KEGG Pathway	24	ko05146	Amoebiasis		-5.9	13	8.9	20504	106	104	7	6.7	2.5	12825|12826|12827|12842|12843|14268|226519	Col3a1|Col4a1|Col4a2|Col1a1|Col1a2|Fn1|Lamc1	-4.9
D16_MCODE_ALL	KEGG Pathway	24	mmu00970	Aminoacyl-tRNA biosynthesis		-5.9	18	9.7	20504	67	104	6	5.8	2.3	70223|104458|105148|107045|216443|353172	Nars|Rars|Iars|Lars|Mars1|Gars	-4.9
D16_MCODE_ALL	GO Molecular Functions	21	GO:0004656	procollagen-proline 4-dioxygenase activity		-5.9	120	19	20504	5	104	3	2.9	1.6	18451|18452|18453	P4ha1|P4ha2|P4hb	-4.9
D16_MCODE_ALL	KEGG Pathway	24	mmu05146	Amoebiasis		-5.9	13	8.8	20504	108	104	7	6.7	2.5	12825|12826|12827|12842|12843|14268|226519	Col3a1|Col4a1|Col4a2|Col1a1|Col1a2|Fn1|Lamc1	-4.9
D16_MCODE_ALL	GO Molecular Functions	21	GO:0031369	translation initiation factor binding		-5.9	26	11	20504	38	104	5	4.8	2.1	14265|20085|27979|56347|208643	Fmr1|Rps19|Eif3b|Eif3c|Eif4g1	-4.9
D16_MCODE_ALL	GO Biological Processes	19	GO:0019080	viral gene expression	19_GO:0016032 viral process	-5.9	17	9.6	20504	69	104	6	5.8	2.3	13669|15364|19205|27979|55944|223691	Eif3a|Hmga2|Ptbp1|Eif3b|Eif3d|Eif3l	-4.8
D16_MCODE_ALL	Reactome Gene Sets	6	R-MMU-2243919	Crosslinking of collagen fibrils		-5.8	46	13	20504	17	104	4	3.8	1.9	12826|12827|12842|12843	Col4a1|Col4a2|Col1a1|Col1a2	-4.8
D16_MCODE_ALL	GO Biological Processes	19	GO:0001706	endoderm formation	19_GO:0032502 developmental process	-5.8	25	11	20504	39	104	5	4.8	2.1	12831|12832|14268|15364|26914	Col5a1|Col5a2|Fn1|Hmga2|Macroh2a1	-4.8
D16_MCODE_ALL	GO Molecular Functions	21	GO:0016874	ligase activity		-5.7	9.6	7.9	20504	164	104	8	7.7	2.6	27053|69719|70223|104458|105148|107045|216443|353172	Asns|Cad|Nars|Rars|Iars|Lars|Mars1|Gars	-4.7
D16_MCODE_ALL	GO Biological Processes	19	GO:1903224	regulation of endodermal cell differentiation	19_GO:0032502 developmental process	-5.6	99	17	20504	6	104	3	2.9	1.6	12831|12832|26914	Col5a1|Col5a2|Macroh2a1	-4.6
D16_MCODE_ALL	GO Molecular Functions	21	GO:0140101	catalytic activity, acting on a tRNA		-5.6	12	8.2	20504	120	104	7	6.7	2.5	28114|70223|104458|105148|107045|216443|353172	Nsun2|Nars|Rars|Iars|Lars|Mars1|Gars	-4.6
D16_MCODE_ALL	Reactome Gene Sets	6	R-MMU-72163	mRNA Splicing - Major Pathway		-5.6	9.2	7.7	20504	172	104	8	7.7	2.6	11991|15387|53379|59013|66055|68879|74326|74351	Hnrnpd|Hnrnpk|Hnrnpa2b1|Hnrnph1|Sf3b6|Prpf6|Hnrnpr|Ddx23	-4.6
D16_MCODE_ALL	GO Biological Processes	19	GO:0071230	cellular response to amino acid stimulus	19_GO:0050896 response to stimulus	-5.5	9.1	7.7	20504	173	104	8	7.7	2.6	12825|12826|12832|12833|12842|12843|13433|107045	Col3a1|Col4a1|Col5a2|Col6a1|Col1a1|Col1a2|Dnmt1|Lars	-4.6
D16_MCODE_ALL	GO Biological Processes	19	GO:0030261	chromosome condensation	19_GO:0009987 cellular process	-5.5	22	10	20504	45	104	5	4.8	2.1	14958|15364|50708|50709|56702	H1f0|Hmga2|H1f2|H1f4|H1f5	-4.5
D16_MCODE_ALL	GO Biological Processes	19	GO:0018205	peptidyl-lysine modification	19_GO:0008152 metabolic process	-5.5	5.8	6.7	20504	376	104	11	11	3	13433|16468|18822|26432|26433|26914|30877|50708|50709|56702|57320	Dnmt1|Jarid2|Plod1|Plod2|Plod3|Macroh2a1|Gnl3|H1f2|H1f4|H1f5|Park7	-4.5
D16_MCODE_ALL	Reactome Gene Sets	6	R-MMU-72172	mRNA Splicing		-5.5	8.9	7.5	20504	178	104	8	7.7	2.6	11991|15387|53379|59013|66055|68879|74326|74351	Hnrnpd|Hnrnpk|Hnrnpa2b1|Hnrnph1|Sf3b6|Prpf6|Hnrnpr|Ddx23	-4.5
D16_MCODE_ALL	GO Biological Processes	19	GO:2001252	positive regulation of chromosome organization	19_GO:0048518 positive regulation of biological process	-5.4	14	8.7	20504	82	104	6	5.8	2.3	11991|12464|13433|26914|30877|53379	Hnrnpd|Cct4|Dnmt1|Macroh2a1|Gnl3|Hnrnpa2b1	-4.5
D16_MCODE_ALL	CORUM	33	CORUM:3145	Coatomer complex		-5.4	84	16	20504	7	104	3	2.9	1.6	12847|50797|59042	Copa|Copb2|Cope	-4.4
D16_MCODE_ALL	GO Biological Processes	19	GO:0071229	cellular response to acid chemical	19_GO:0050896 response to stimulus	-5.3	8.4	7.3	20504	187	104	8	7.7	2.6	12825|12826|12832|12833|12842|12843|13433|107045	Col3a1|Col4a1|Col5a2|Col6a1|Col1a1|Col1a2|Dnmt1|Lars	-4.3
D16_MCODE_ALL	GO Biological Processes	19	GO:0043200	response to amino acid	19_GO:0050896 response to stimulus	-5.3	8.4	7.3	20504	187	104	8	7.7	2.6	12825|12826|12832|12833|12842|12843|13433|107045	Col3a1|Col4a1|Col5a2|Col6a1|Col1a1|Col1a2|Dnmt1|Lars	-4.3
D16_MCODE_ALL	CORUM	33	CORUM:3146	Coatomer-Arf1 complex		-5.2	74	15	20504	8	104	3	2.9	1.6	12847|50797|59042	Copa|Copb2|Cope	-4.2
D16_MCODE_ALL	GO Molecular Functions	21	GO:0031545	peptidyl-proline 4-dioxygenase activity		-5.2	74	15	20504	8	104	3	2.9	1.6	18451|18452|18453	P4ha1|P4ha2|P4hb	-4.2
D16_MCODE_ALL	GO Molecular Functions	21	GO:0019798	procollagen-proline dioxygenase activity		-5.2	74	15	20504	8	104	3	2.9	1.6	18451|18452|18453	P4ha1|P4ha2|P4hb	-4.2
D16_MCODE_ALL	GO Biological Processes	19	GO:0016071	mRNA metabolic process	19_GO:0008152 metabolic process	-5.1	4.1	5.8	20504	675	104	14	13	3.3	11991|14265|15387|16341|19205|28114|50926|53379|59013|66055|67755|68879|74326|74351	Hnrnpd|Fmr1|Hnrnpk|Eif3e|Ptbp1|Nsun2|Hnrnpdl|Hnrnpa2b1|Hnrnph1|Sf3b6|Ddx47|Prpf6|Hnrnpr|Ddx23	-4.2
D16_MCODE_ALL	GO Biological Processes	19	GO:0010608	posttranscriptional regulation of gene expression	19_GO:0008152 metabolic process	-5.1	4.4	5.9	20504	583	104	13	12	3.2	11991|14265|16341|27979|28114|52874|53379|55944|68015|74326|208643|229317|234374	Hnrnpd|Fmr1|Eif3e|Eif3b|Nsun2|Pum3|Hnrnpa2b1|Eif3d|Trap1|Hnrnpr|Eif4g1|Eif2a|Ddx49	-4.2
D16_MCODE_ALL	WikiPathways	27	WP3855	Dysregulated miRNA targeting in insulin/PI3K-AKT signaling		-5.1	30	11	20504	26	104	4	3.8	1.9	12825|12827|12842|12843	Col3a1|Col4a2|Col1a1|Col1a2	-4.1
D16_MCODE_ALL	GO Molecular Functions	21	GO:0031490	chromatin DNA binding		-5	12	7.9	20504	97	104	6	5.8	2.3	14958|15364|26914|50708|50709|56702	H1f0|Hmga2|Macroh2a1|H1f2|H1f4|H1f5	-4.1
D16_MCODE_ALL	GO Biological Processes	19	GO:1901607	alpha-amino acid biosynthetic process	19_GO:0008152 metabolic process	-5	17	8.8	20504	57	104	5	4.8	2.1	26432|26433|27053|57320|69719	Plod2|Plod3|Asns|Park7|Cad	-4.1
D16_MCODE_ALL	CORUM	33	CORUM:414	(ER)-localized multiprotein complex, in absence of Ig heavy chains		-5	66	14	20504	9	104	3	2.9	1.6	14828|18453|19035	Hspa5|P4hb|Ppib	-4.1
D16_MCODE_ALL	GO Biological Processes	19	GO:0017185	peptidyl-lysine hydroxylation	19_GO:0008152 metabolic process	-5	66	14	20504	9	104	3	2.9	1.6	18822|26432|26433	Plod1|Plod2|Plod3	-4.1
D16_MCODE_ALL	GO Biological Processes	19	GO:0072378	blood coagulation, fibrin clot formation	19_GO:0032501 multicellular organismal process	-5	66	14	20504	9	104	3	2.9	1.6	14161|14268|99571	Fga|Fn1|Fgg	-4.1
D16_MCODE_ALL	GO Biological Processes	19	GO:0001101	response to acid chemical	19_GO:0050896 response to stimulus	-4.9	7.5	6.8	20504	209	104	8	7.7	2.6	12825|12826|12832|12833|12842|12843|13433|107045	Col3a1|Col4a1|Col5a2|Col6a1|Col1a1|Col1a2|Dnmt1|Lars	-4
D16_MCODE_ALL	KEGG Pathway	24	ko04933	AGE-RAGE signaling pathway in diabetic complications		-4.9	12	7.8	20504	100	104	6	5.8	2.3	12825|12826|12827|12842|12843|14268	Col3a1|Col4a1|Col4a2|Col1a1|Col1a2|Fn1	-4
D16_MCODE_ALL	GO Molecular Functions	21	GO:0019838	growth factor binding		-4.9	9.1	7.2	20504	151	104	7	6.7	2.5	12825|12826|12831|12833|12842|12843|20085	Col3a1|Col4a1|Col5a1|Col6a1|Col1a1|Col1a2|Rps19	-4
D16_MCODE_ALL	GO Biological Processes	19	GO:0001825	blastocyst formation	19_GO:0032502 developmental process	-4.9	17	8.6	20504	59	104	5	4.8	2.1	53414|66055|66229|74778|107071	Bysl|Sf3b6|Rpl7l1|Rrp7a|Wdr74	-4
D16_MCODE_ALL	KEGG Pathway	24	mmu04933	AGE-RAGE signaling pathway in diabetic complications		-4.8	11	7.6	20504	103	104	6	5.8	2.3	12825|12826|12827|12842|12843|14268	Col3a1|Col4a1|Col4a2|Col1a1|Col1a2|Fn1	-4
D16_MCODE_ALL	GO Molecular Functions	21	GO:0003680	minor groove of adenine-thymine-rich DNA binding		-4.8	59	13	20504	10	104	3	2.9	1.6	11991|14958|15364	Hnrnpd|H1f0|Hmga2	-3.9
D16_MCODE_ALL	CORUM	33	CORUM:413	(ER)-localized multiprotein complex, Ig heavy chains associated		-4.8	59	13	20504	10	104	3	2.9	1.6	14828|18453|19035	Hspa5|P4hb|Ppib	-3.9
D16_MCODE_ALL	GO Biological Processes	19	GO:0008652	cellular amino acid biosynthetic process	19_GO:0008152 metabolic process	-4.7	15	8.2	20504	64	104	5	4.8	2.1	26432|26433|27053|57320|69719	Plod2|Plod3|Asns|Park7|Cad	-3.9
D16_MCODE_ALL	GO Molecular Functions	21	GO:0140657	ATP-dependent activity		-4.7	4.4	5.7	20504	541	104	12	12	3.1	12464|14828|15525|18392|67755|68015|69663|71819|71990|74351|234374|235661	Cct4|Hspa5|Hspa4|Orc1|Ddx47|Trap1|Ddx51|Kif23|Ddx54|Ddx23|Ddx49|Dync1li1	-3.8
D16_MCODE_ALL	GO Biological Processes	19	GO:0018401	peptidyl-proline hydroxylation to 4-hydroxy-L-proline	19_GO:0008152 metabolic process	-4.7	54	12	20504	11	104	3	2.9	1.6	18451|18452|18453	P4ha1|P4ha2|P4hb	-3.8
D16_MCODE_ALL	Reactome Gene Sets	6	R-MMU-72203	Processing of Capped Intron-Containing Pre-mRNA		-4.7	6.9	6.4	20504	229	104	8	7.7	2.6	11991|15387|53379|59013|66055|68879|74326|74351	Hnrnpd|Hnrnpk|Hnrnpa2b1|Hnrnph1|Sf3b6|Prpf6|Hnrnpr|Ddx23	-3.8
D16_MCODE_ALL	KEGG Pathway	24	ko03013	RNA transport		-4.6	8.3	6.7	20504	167	104	7	6.7	2.5	13669|14265|16341|27979|55944|56347|208643	Eif3a|Fmr1|Eif3e|Eif3b|Eif3d|Eif3c|Eif4g1	-3.8
D16_MCODE_ALL	KEGG Pathway	24	mmu03013	RNA transport		-4.6	8.2	6.7	20504	168	104	7	6.7	2.5	13669|14265|16341|27979|55944|56347|208643	Eif3a|Fmr1|Eif3e|Eif3b|Eif3d|Eif3c|Eif4g1	-3.8
D16_MCODE_ALL	GO Biological Processes	19	GO:0006399	tRNA metabolic process	19_GO:0008152 metabolic process	-4.6	8.2	6.7	20504	168	104	7	6.7	2.5	28114|70223|104458|105148|107045|216443|353172	Nsun2|Nars|Rars|Iars|Lars|Mars1|Gars	-3.8
D16_MCODE_ALL	Reactome Gene Sets	6	R-MMU-8957275	Post-translational protein phosphorylation		-4.6	10	7.2	20504	114	104	6	5.8	2.3	14118|14161|14268|18453|99571|216197	Fbn1|Fga|Fn1|P4hb|Fgg|Ckap4	-3.7
D16_MCODE_ALL	GO Biological Processes	19	GO:0006356	regulation of transcription by RNA polymerase I	19_GO:0008152 metabolic process	-4.6	23	9.2	20504	34	104	4	3.8	1.9	26914|72515|216443|217995	Macroh2a1|Wdr43|Mars1|Heatr1	-3.7
D16_MCODE_ALL	Reactome Gene Sets	6	R-MMU-140342	Apoptosis induced DNA fragmentation		-4.6	49	12	20504	12	104	3	2.9	1.6	14958|50708|56702	H1f0|H1f2|H1f5	-3.7
D16_MCODE_ALL	GO Biological Processes	19	GO:0038063	collagen-activated tyrosine kinase receptor signaling pathway	19_GO:0023052 signaling	-4.6	49	12	20504	12	104	3	2.9	1.6	12826|12827|12842	Col4a1|Col4a2|Col1a1	-3.7
D16_MCODE_ALL	GO Molecular Functions	21	GO:0031543	peptidyl-proline dioxygenase activity		-4.6	49	12	20504	12	104	3	2.9	1.6	18451|18452|18453	P4ha1|P4ha2|P4hb	-3.7
D16_MCODE_ALL	KEGG Pathway	24	ko03008	Ribosome biogenesis in eukaryotes		-4.6	10	7.1	20504	116	104	6	5.8	2.3	30877|69237|72515|72554|74778|217995	Gnl3|Gtpbp4|Wdr43|Utp14a|Rrp7a|Heatr1	-3.7
D16_MCODE_ALL	GO Biological Processes	19	GO:0051052	regulation of DNA metabolic process	19_GO:0008152 metabolic process	-4.6	5.1	5.8	20504	388	104	10	9.6	2.9	11991|12464|13433|14958|15364|30877|50708|50709|53379|56702	Hnrnpd|Cct4|Dnmt1|H1f0|Hmga2|Gnl3|H1f2|H1f4|Hnrnpa2b1|H1f5	-3.7
D16_MCODE_ALL	GO Molecular Functions	21	GO:0000049	tRNA binding		-4.5	14	7.8	20504	70	104	5	4.8	2.1	28114|104458|105148|216443|229317	Nsun2|Rars|Iars|Mars1|Eif2a	-3.7
D16_MCODE_ALL	KEGG Pathway	24	mmu03008	Ribosome biogenesis in eukaryotes		-4.5	10	7.1	20504	117	104	6	5.8	2.3	30877|69237|72515|72554|74778|217995	Gnl3|Gtpbp4|Wdr43|Utp14a|Rrp7a|Heatr1	-3.7
D16_MCODE_ALL	GO Biological Processes	19	GO:0006417	regulation of translation	19_GO:0008152 metabolic process	-4.5	5	5.8	20504	391	104	10	9.6	2.9	11991|14265|16341|27979|52874|55944|68015|74326|208643|229317	Hnrnpd|Fmr1|Eif3e|Eif3b|Pum3|Eif3d|Trap1|Hnrnpr|Eif4g1|Eif2a	-3.7
D16_MCODE_ALL	GO Biological Processes	19	GO:0032963	collagen metabolic process	19_GO:0008152 metabolic process	-4.5	9.9	7	20504	119	104	6	5.8	2.3	12406|12831|12842|12843|14268|26433	Serpinh1|Col5a1|Col1a1|Col1a2|Fn1|Plod3	-3.6
D16_MCODE_ALL	Reactome Gene Sets	6	R-MMU-381426	Regulation of Insulin-like Growth Factor (IGF) transport and uptake by Insulin-like Growth Factor Binding Proteins (IGFBPs)		-4.5	9.9	6.9	20504	120	104	6	5.8	2.3	14118|14161|14268|18453|99571|216197	Fbn1|Fga|Fn1|P4hb|Fgg|Ckap4	-3.6
D16_MCODE_ALL	GO Biological Processes	19	GO:0051098	regulation of binding	19_GO:0065007 biological regulation	-4.5	5	5.7	20504	397	104	10	9.6	2.9	14265|14958|15364|15387|15525|16341|55944|57320|69237|208643	Fmr1|H1f0|Hmga2|Hnrnpk|Hspa4|Eif3e|Eif3d|Park7|Gtpbp4|Eif4g1	-3.6
D16_MCODE_ALL	GO Molecular Functions	21	GO:0003724	RNA helicase activity		-4.5	14	7.6	20504	73	104	5	4.8	2.1	67755|69663|71990|74351|234374	Ddx47|Ddx51|Ddx54|Ddx23|Ddx49	-3.6
D16_MCODE_ALL	GO Biological Processes	19	GO:0072376	protein activation cascade	19_GO:0050896 response to stimulus	-4.5	45	11	20504	13	104	3	2.9	1.6	14161|14268|99571	Fga|Fn1|Fgg	-3.6
D16_MCODE_ALL	GO Biological Processes	19	GO:0007492	endoderm development	19_GO:0032502 developmental process	-4.4	13	7.5	20504	75	104	5	4.8	2.1	12831|12832|14268|15364|26914	Col5a1|Col5a2|Fn1|Hmga2|Macroh2a1	-3.6
D16_MCODE_ALL	GO Molecular Functions	21	GO:0008186	ATP-dependent activity, acting on RNA		-4.4	13	7.5	20504	75	104	5	4.8	2.1	67755|69663|71990|74351|234374	Ddx47|Ddx51|Ddx54|Ddx23|Ddx49	-3.6
D16_MCODE_ALL	Reactome Gene Sets	6	R-MMU-8856688	Golgi-to-ER retrograde transport		-4.4	9.5	6.8	20504	124	104	6	5.8	2.3	12847|26934|50797|59042|71819|235661	Copa|Racgap1|Copb2|Cope|Kif23|Dync1li1	-3.6
D16_MCODE_ALL	GO Biological Processes	19	GO:0034968	histone lysine methylation	19_GO:0008152 metabolic process	-4.4	9.5	6.8	20504	124	104	6	5.8	2.3	13433|16468|26914|50708|50709|56702	Dnmt1|Jarid2|Macroh2a1|H1f2|H1f4|H1f5	-3.6
D16_MCODE_ALL	GO Biological Processes	19	GO:0033044	regulation of chromosome organization	19_GO:0050789 regulation of biological process	-4.4	7.5	6.3	20504	185	104	7	6.7	2.5	11991|12464|13433|26914|30877|53379|235661	Hnrnpd|Cct4|Dnmt1|Macroh2a1|Gnl3|Hnrnpa2b1|Dync1li1	-3.5
D16_MCODE_ALL	GO Biological Processes	19	GO:0019511	peptidyl-proline hydroxylation	19_GO:0008152 metabolic process	-4.4	42	11	20504	14	104	3	2.9	1.6	18451|18452|18453	P4ha1|P4ha2|P4hb	-3.5
D16_MCODE_ALL	GO Biological Processes	19	GO:0018208	peptidyl-proline modification	19_GO:0008152 metabolic process	-4.3	20	8.6	20504	39	104	4	3.8	1.9	18451|18452|18453|19035	P4ha1|P4ha2|P4hb|Ppib	-3.5
D16_MCODE_ALL	Reactome Gene Sets	6	R-MMU-2559586	DNA Damage/Telomere Stress Induced Senescence		-4.3	12	7.3	20504	79	104	5	4.8	2.1	14958|15364|50708|56702|326619	H1f0|Hmga2|H1f2|H1f5|H4c1	-3.5
D16_MCODE_ALL	Reactome Gene Sets	6	R-MMU-372708	p130Cas linkage to MAPK signaling for integrins		-4.3	39	11	20504	15	104	3	2.9	1.6	14161|14268|99571	Fga|Fn1|Fgg	-3.4
D16_MCODE_ALL	Reactome Gene Sets	6	R-MMU-354194	GRB2:SOS provides linkage to MAPK signaling for Integrins		-4.3	39	11	20504	15	104	3	2.9	1.6	14161|14268|99571	Fga|Fn1|Fgg	-3.4
D16_MCODE_ALL	GO Biological Processes	19	GO:1904814	regulation of protein localization to chromosome, telomeric region	19_GO:0051179 localization	-4.3	39	11	20504	15	104	3	2.9	1.6	12464|26914|30877	Cct4|Macroh2a1|Gnl3	-3.4
D16_MCODE_ALL	GO Biological Processes	19	GO:0051099	positive regulation of binding	19_GO:0065007 biological regulation	-4.2	7.2	6.1	20504	193	104	7	6.7	2.5	14265|14958|15525|16341|55944|57320|208643	Fmr1|H1f0|Hspa4|Eif3e|Eif3d|Park7|Eif4g1	-3.4
D16_MCODE_ALL	GO Biological Processes	19	GO:0006334	nucleosome assembly	19_GO:0009987 cellular process	-4.2	12	7.1	20504	82	104	5	4.8	2.1	14958|26914|50708|50709|56702	H1f0|Macroh2a1|H1f2|H1f4|H1f5	-3.4
D16_MCODE_ALL	GO Biological Processes	19	GO:0016032	viral process	19_GO:0016032 viral process	-4.2	5.1	5.5	20504	346	104	9	8.7	2.8	13669|14265|15364|18453|19035|19205|27979|55944|223691	Eif3a|Fmr1|Hmga2|P4hb|Ppib|Ptbp1|Eif3b|Eif3d|Eif3l	-3.4
D16_MCODE_ALL	KEGG Pathway	24	ko04151	PI3K-Akt signaling pathway		-4.2	5.1	5.5	20504	346	104	9	8.7	2.8	12826|12827|12833|12834|12835|12842|12843|14268|226519	Col4a1|Col4a2|Col6a1|Col6a2|Col6a3|Col1a1|Col1a2|Fn1|Lamc1	-3.4
D16_MCODE_ALL	GO Biological Processes	19	GO:0000463	maturation of LSU-rRNA from tricistronic rRNA transcript (SSU-rRNA, 5.8S rRNA, LSU-rRNA)	19_GO:0008152 metabolic process	-4.2	37	10	20504	16	104	3	2.9	1.6	64934|66229|69237	Pes1|Rpl7l1|Gtpbp4	-3.4
D16_MCODE_ALL	GO Biological Processes	19	GO:0038065	collagen-activated signaling pathway	19_GO:0023052 signaling	-4.2	37	10	20504	16	104	3	2.9	1.6	12826|12827|12842	Col4a1|Col4a2|Col1a1	-3.4
D16_MCODE_ALL	KEGG Pathway	24	mmu04151	PI3K-Akt signaling pathway		-4.1	5.1	5.5	20504	350	104	9	8.7	2.8	12826|12827|12833|12834|12835|12842|12843|14268|226519	Col4a1|Col4a2|Col6a1|Col6a2|Col6a3|Col1a1|Col1a2|Fn1|Lamc1	-3.3
D16_MCODE_ALL	GO Biological Processes	19	GO:0071103	DNA conformation change	19_GO:0009987 cellular process	-4.1	6.8	5.9	20504	203	104	7	6.7	2.5	14958|15364|26914|50708|50709|53379|56702	H1f0|Hmga2|Macroh2a1|H1f2|H1f4|Hnrnpa2b1|H1f5	-3.3
D16_MCODE_ALL	GO Biological Processes	19	GO:0001886	endothelial cell morphogenesis	19_GO:0032502 developmental process	-4.1	35	10	20504	17	104	3	2.9	1.6	12819|12822|26433	Col15a1|Col18a1|Plod3	-3.3
D16_MCODE_ALL	GO Biological Processes	19	GO:0018022	peptidyl-lysine methylation	19_GO:0008152 metabolic process	-4.1	8.4	6.3	20504	141	104	6	5.8	2.3	13433|16468|26914|50708|50709|56702	Dnmt1|Jarid2|Macroh2a1|H1f2|H1f4|H1f5	-3.3
D16_MCODE_ALL	GO Biological Processes	19	GO:0045910	negative regulation of DNA recombination	19_GO:0048519 negative regulation of biological process	-4	17	7.7	20504	47	104	4	3.8	1.9	14958|50708|50709|56702	H1f0|H1f2|H1f4|H1f5	-3.2
D16_MCODE_ALL	GO Biological Processes	19	GO:0034248	regulation of cellular amide metabolic process	19_GO:0008152 metabolic process	-4	4.4	5.2	20504	449	104	10	9.6	2.9	11991|14265|16341|27979|52874|55944|68015|74326|208643|229317	Hnrnpd|Fmr1|Eif3e|Eif3b|Pum3|Eif3d|Trap1|Hnrnpr|Eif4g1|Eif2a	-3.2
D16_MCODE_ALL	Reactome Gene Sets	6	R-MMU-6811434	COPI-dependent Golgi-to-ER retrograde traffic		-4	11	6.7	20504	91	104	5	4.8	2.1	12847|26934|50797|59042|71819	Copa|Racgap1|Copb2|Cope|Kif23	-3.2
D16_MCODE_ALL	GO Molecular Functions	21	GO:0048029	monosaccharide binding		-4	11	6.7	20504	91	104	5	4.8	2.1	18451|18452|18822|26432|26433	P4ha1|P4ha2|Plod1|Plod2|Plod3	-3.2
D16_MCODE_ALL	GO Molecular Functions	21	GO:0003682	chromatin binding		-4	3.6	4.9	20504	649	104	12	12	3.1	11991|13433|14265|14958|15364|16468|18140|18392|26914|50708|50709|56702	Hnrnpd|Dnmt1|Fmr1|H1f0|Hmga2|Jarid2|Uhrf1|Orc1|Macroh2a1|H1f2|H1f4|H1f5	-3.2
D16_MCODE_ALL	GO Biological Processes	19	GO:1903312	negative regulation of mRNA metabolic process	19_GO:0048519 negative regulation of biological process	-4	11	6.6	20504	93	104	5	4.8	2.1	11991|14265|15387|19205|53379	Hnrnpd|Fmr1|Hnrnpk|Ptbp1|Hnrnpa2b1	-3.2
D16_MCODE_ALL	GO Biological Processes	19	GO:0016570	histone modification	19_GO:0008152 metabolic process	-3.9	4.3	5.1	20504	462	104	10	9.6	2.9	13433|14265|15364|16468|18140|26914|50708|50709|56702|57320	Dnmt1|Fmr1|Hmga2|Jarid2|Uhrf1|Macroh2a1|H1f2|H1f4|H1f5|Park7	-3.1
D16_MCODE_ALL	GO Biological Processes	19	GO:0034502	protein localization to chromosome	19_GO:0051179 localization	-3.9	10	6.5	20504	96	104	5	4.8	2.1	12464|16468|26914|30877|56702	Cct4|Jarid2|Macroh2a1|Gnl3|H1f5	-3.1
D16_MCODE_ALL	WikiPathways	27	WP662	Amino acid metabolism		-3.9	10	6.5	20504	96	104	5	4.8	2.1	18452|27053|69719|104458|105148	P4ha2|Asns|Cad|Rars|Iars	-3.1
D16_MCODE_ALL	GO Biological Processes	19	GO:0016571	histone methylation	19_GO:0008152 metabolic process	-3.9	7.7	5.9	20504	154	104	6	5.8	2.3	13433|16468|26914|50708|50709|56702	Dnmt1|Jarid2|Macroh2a1|H1f2|H1f4|H1f5	-3.1
D16_MCODE_ALL	GO Biological Processes	19	GO:0000028	ribosomal small subunit assembly	19_GO:0009987 cellular process	-3.9	30	9.1	20504	20	104	3	2.9	1.6	20044|20085|74778	Rps14|Rps19|Rrp7a	-3.1
D16_MCODE_ALL	GO Biological Processes	19	GO:0006323	DNA packaging	19_GO:0009987 cellular process	-3.9	7.6	5.9	20504	155	104	6	5.8	2.3	14958|15364|26914|50708|50709|56702	H1f0|Hmga2|Macroh2a1|H1f2|H1f4|H1f5	-3.1
D16_MCODE_ALL	GO Biological Processes	19	GO:0006360	transcription by RNA polymerase I	19_GO:0008152 metabolic process	-3.9	15	7.3	20504	52	104	4	3.8	1.9	26914|72515|216443|217995	Macroh2a1|Wdr43|Mars1|Heatr1	-3.1
D16_MCODE_ALL	GO Biological Processes	19	GO:0032206	positive regulation of telomere maintenance	19_GO:0048518 positive regulation of biological process	-3.9	15	7.3	20504	52	104	4	3.8	1.9	11991|12464|30877|53379	Hnrnpd|Cct4|Gnl3|Hnrnpa2b1	-3.1
D16_MCODE_ALL	GO Biological Processes	19	GO:0009067	aspartate family amino acid biosynthetic process	19_GO:0008152 metabolic process	-3.8	28	8.9	20504	21	104	3	2.9	1.6	26432|26433|27053	Plod2|Plod3|Asns	-3
D16_MCODE_ALL	GO Molecular Functions	21	GO:0016705	oxidoreductase activity, acting on paired donors, with incorporation or reduction of molecular oxygen		-3.8	6	5.5	20504	229	104	7	6.7	2.5	16468|18451|18452|18453|18822|26432|26433	Jarid2|P4ha1|P4ha2|P4hb|Plod1|Plod2|Plod3	-3
D16_MCODE_ALL	GO Biological Processes	19	GO:0001704	formation of primary germ layer	19_GO:0032502 developmental process	-3.8	9.7	6.3	20504	102	104	5	4.8	2.1	12831|12832|14268|15364|26914	Col5a1|Col5a2|Fn1|Hmga2|Macroh2a1	-3
D16_MCODE_ALL	GO Biological Processes	19	GO:0032964	collagen biosynthetic process	19_GO:0008152 metabolic process	-3.8	14	7.1	20504	55	104	4	3.8	1.9	12406|12831|12842|14268	Serpinh1|Col5a1|Col1a1|Fn1	-3
D16_MCODE_ALL	GO Biological Processes	19	GO:0031497	chromatin assembly	19_GO:0009987 cellular process	-3.7	9.5	6.2	20504	104	104	5	4.8	2.1	14958|26914|50708|50709|56702	H1f0|Macroh2a1|H1f2|H1f4|H1f5	-3
D16_MCODE_ALL	GO Biological Processes	19	GO:0008380	RNA splicing	19_GO:0008152 metabolic process	-3.7	4.4	5	20504	399	104	9	8.7	2.8	14265|15387|19205|53379|59013|66055|67755|68879|74351	Fmr1|Hnrnpk|Ptbp1|Hnrnpa2b1|Hnrnph1|Sf3b6|Ddx47|Prpf6|Ddx23	-3
D16_MCODE_ALL	GO Molecular Functions	21	GO:0003730	mRNA 3'-UTR binding		-3.7	9.3	6.1	20504	106	104	5	4.8	2.1	11991|14265|15387|53379|74326	Hnrnpd|Fmr1|Hnrnpk|Hnrnpa2b1|Hnrnpr	-2.9
D16_MCODE_ALL	GO Biological Processes	19	GO:0045943	positive regulation of transcription by RNA polymerase I	19_GO:0048518 positive regulation of biological process	-3.7	26	8.5	20504	23	104	3	2.9	1.6	72515|216443|217995	Wdr43|Mars1|Heatr1	-2.9
D16_MCODE_ALL	GO Molecular Functions	21	GO:0043021	ribonucleoprotein complex binding		-3.7	7	5.6	20504	168	104	6	5.8	2.3	14265|14828|15387|56347|68879|229317	Fmr1|Hspa5|Hnrnpk|Eif3c|Prpf6|Eif2a	-2.9
D16_MCODE_ALL	KEGG Pathway	24	ko00310	Lysine degradation		-3.6	13	6.8	20504	59	104	4	3.8	1.9	18822|26432|26433|234407	Plod1|Plod2|Plod3|Colgalt1	-2.9
D16_MCODE_ALL	GO Biological Processes	19	GO:0070734	histone H3-K27 methylation	19_GO:0008152 metabolic process	-3.6	25	8.3	20504	24	104	3	2.9	1.6	26914|50708|50709	Macroh2a1|H1f2|H1f4	-2.9
D16_MCODE_ALL	GO Biological Processes	19	GO:0048025	negative regulation of mRNA splicing, via spliceosome	19_GO:0048519 negative regulation of biological process	-3.6	25	8.3	20504	24	104	3	2.9	1.6	15387|19205|53379	Hnrnpk|Ptbp1|Hnrnpa2b1	-2.9
D16_MCODE_ALL	GO Biological Processes	19	GO:0022618	ribonucleoprotein complex assembly	19_GO:0009987 cellular process	-3.6	6.9	5.5	20504	171	104	6	5.8	2.3	13669|20044|20085|55944|68879|74778	Eif3a|Rps14|Rps19|Eif3d|Prpf6|Rrp7a	-2.9
D16_MCODE_ALL	GO Biological Processes	19	GO:0051568	histone H3-K4 methylation	19_GO:0008152 metabolic process	-3.6	13	6.7	20504	61	104	4	3.8	1.9	13433|26914|50708|50709	Dnmt1|Macroh2a1|H1f2|H1f4	-2.8
D16_MCODE_ALL	KEGG Pathway	24	mmu00310	Lysine degradation		-3.6	13	6.7	20504	61	104	4	3.8	1.9	18822|26432|26433|234407	Plod1|Plod2|Plod3|Colgalt1	-2.8
D16_MCODE_ALL	GO Biological Processes	19	GO:0006403	RNA localization	19_GO:0051179 localization	-3.6	6.8	5.5	20504	174	104	6	5.8	2.3	12464|14265|23881|28114|53379|68879	Cct4|Fmr1|G3bp2|Nsun2|Hnrnpa2b1|Prpf6	-2.8
D16_MCODE_ALL	GO Biological Processes	19	GO:0031056	regulation of histone modification	19_GO:0008152 metabolic process	-3.6	6.8	5.5	20504	174	104	6	5.8	2.3	13433|14265|16468|26914|56702|57320	Dnmt1|Fmr1|Jarid2|Macroh2a1|H1f5|Park7	-2.8
D16_MCODE_ALL	Reactome Gene Sets	6	R-MMU-3000157	Laminin interactions		-3.6	24	8.1	20504	25	104	3	2.9	1.6	12822|12826|12827	Col18a1|Col4a1|Col4a2	-2.8
D16_MCODE_ALL	GO Biological Processes	19	GO:1901699	cellular response to nitrogen compound	19_GO:0050896 response to stimulus	-3.6	3.3	4.5	20504	717	104	12	12	3.1	11991|12825|12826|12832|12833|12842|12843|13433|14265|15387|107045|216443	Hnrnpd|Col3a1|Col4a1|Col5a2|Col6a1|Col1a1|Col1a2|Dnmt1|Fmr1|Hnrnpk|Lars|Mars1	-2.8
D16_MCODE_ALL	Reactome Gene Sets	6	R-MMU-6811442	Intra-Golgi and retrograde Golgi-to-ER traffic		-3.5	6.7	5.4	20504	177	104	6	5.8	2.3	12847|26934|50797|59042|71819|235661	Copa|Racgap1|Copb2|Cope|Kif23|Dync1li1	-2.8
D16_MCODE_ALL	GO Biological Processes	19	GO:0071826	ribonucleoprotein complex subunit organization	19_GO:0009987 cellular process	-3.5	6.6	5.4	20504	178	104	6	5.8	2.3	13669|20044|20085|55944|68879|74778	Eif3a|Rps14|Rps19|Eif3d|Prpf6|Rrp7a	-2.8
D16_MCODE_ALL	GO Biological Processes	19	GO:0042255	ribosome assembly	19_GO:0009987 cellular process	-3.5	13	6.5	20504	63	104	4	3.8	1.9	20044|20085|74778|229317	Rps14|Rps19|Rrp7a|Eif2a	-2.8
D16_MCODE_ALL	GO Biological Processes	19	GO:0070199	establishment of protein localization to chromosome	19_GO:0051179 localization	-3.5	23	7.9	20504	26	104	3	2.9	1.6	12464|26914|56702	Cct4|Macroh2a1|H1f5	-2.8
D16_MCODE_ALL	GO Biological Processes	19	GO:0045787	positive regulation of cell cycle	19_GO:0048518 positive regulation of biological process	-3.5	4.7	4.9	20504	336	104	8	7.7	2.6	18392|26914|26934|27053|71819|208643|235661|267019	Orc1|Macroh2a1|Racgap1|Asns|Kif23|Eif4g1|Dync1li1|Rps15a	-2.8
D16_MCODE_ALL	Reactome Gene Sets	6	R-MMU-422475	Axon guidance		-3.5	5.4	5	20504	256	104	7	6.7	2.5	12825|12826|12827|12831|12832|12833|12834	Col3a1|Col4a1|Col4a2|Col5a1|Col5a2|Col6a1|Col6a2	-2.8
D16_MCODE_ALL	Reactome Gene Sets	6	R-MMU-9675108	Nervous system development		-3.5	5.4	5	20504	257	104	7	6.7	2.5	12825|12826|12827|12831|12832|12833|12834	Col3a1|Col4a1|Col4a2|Col5a1|Col5a2|Col6a1|Col6a2	-2.8
D16_MCODE_ALL	Reactome Gene Sets	6	R-MMU-354192	Integrin signaling		-3.5	22	7.8	20504	27	104	3	2.9	1.6	14161|14268|99571	Fga|Fn1|Fgg	-2.8
D16_MCODE_ALL	GO Biological Processes	19	GO:0031061	negative regulation of histone methylation	19_GO:0048519 negative regulation of biological process	-3.5	22	7.8	20504	27	104	3	2.9	1.6	13433|16468|26914	Dnmt1|Jarid2|Macroh2a1	-2.8
D16_MCODE_ALL	GO Biological Processes	19	GO:0006891	intra-Golgi vesicle-mediated transport	19_GO:0051179 localization	-3.5	22	7.8	20504	27	104	3	2.9	1.6	12847|50797|59042	Copa|Copb2|Cope	-2.8
D16_MCODE_ALL	GO Biological Processes	19	GO:1902175	regulation of oxidative stress-induced intrinsic apoptotic signaling pathway	19_GO:0023052 signaling	-3.4	21	7.6	20504	28	104	3	2.9	1.6	18453|57320|68015	P4hb|Park7|Trap1	-2.7
D16_MCODE_ALL	GO Molecular Functions	21	GO:0031406	carboxylic acid binding		-3.4	6.3	5.2	20504	187	104	6	5.8	2.3	18451|18452|18822|26432|26433|104458	P4ha1|P4ha2|Plod1|Plod2|Plod3|Rars	-2.7
D16_MCODE_ALL	GO Molecular Functions	21	GO:0043022	ribosome binding		-3.4	11	6.2	20504	69	104	4	3.8	1.9	14265|14828|56347|229317	Fmr1|Hspa5|Eif3c|Eif2a	-2.7
D16_MCODE_ALL	GO Biological Processes	19	GO:0033119	negative regulation of RNA splicing	19_GO:0048519 negative regulation of biological process	-3.4	20	7.5	20504	29	104	3	2.9	1.6	15387|19205|53379	Hnrnpk|Ptbp1|Hnrnpa2b1	-2.7
D16_MCODE_ALL	GO Biological Processes	19	GO:0051570	regulation of histone H3-K9 methylation	19_GO:0008152 metabolic process	-3.4	20	7.5	20504	29	104	3	2.9	1.6	13433|16468|56702	Dnmt1|Jarid2|H1f5	-2.7
D16_MCODE_ALL	GO Molecular Functions	21	GO:0048027	mRNA 5'-UTR binding		-3.4	20	7.5	20504	29	104	3	2.9	1.6	14265|20044|30877	Fmr1|Rps14|Gnl3	-2.7
D16_MCODE_ALL	GO Biological Processes	19	GO:0071417	cellular response to organonitrogen compound	19_GO:0050896 response to stimulus	-3.4	3.4	4.3	20504	646	104	11	11	3	11991|12825|12826|12832|12833|12842|12843|13433|15387|107045|216443	Hnrnpd|Col3a1|Col4a1|Col5a2|Col6a1|Col1a1|Col1a2|Dnmt1|Hnrnpk|Lars|Mars1	-2.7
D16_MCODE_ALL	GO Biological Processes	19	GO:0034728	nucleosome organization	19_GO:0009987 cellular process	-3.4	7.9	5.5	20504	125	104	5	4.8	2.1	14958|26914|50708|50709|56702	H1f0|Macroh2a1|H1f2|H1f4|H1f5	-2.7
D16_MCODE_ALL	KEGG Pathway	24	mmu04611	Platelet activation		-3.3	7.8	5.5	20504	126	104	5	4.8	2.1	12825|12842|12843|14161|99571	Col3a1|Col1a1|Col1a2|Fga|Fgg	-2.6
D16_MCODE_ALL	GO Biological Processes	19	GO:0000470	maturation of LSU-rRNA	19_GO:0008152 metabolic process	-3.3	20	7.3	20504	30	104	3	2.9	1.6	64934|66229|69237	Pes1|Rpl7l1|Gtpbp4	-2.6
D16_MCODE_ALL	GO Biological Processes	19	GO:0070198	protein localization to chromosome, telomeric region	19_GO:0051179 localization	-3.3	20	7.3	20504	30	104	3	2.9	1.6	12464|26914|30877	Cct4|Macroh2a1|Gnl3	-2.6
D16_MCODE_ALL	GO Biological Processes	19	GO:0008213	protein alkylation	19_GO:0008152 metabolic process	-3.3	6.1	5.1	20504	194	104	6	5.8	2.3	13433|16468|26914|50708|50709|56702	Dnmt1|Jarid2|Macroh2a1|H1f2|H1f4|H1f5	-2.6
D16_MCODE_ALL	GO Biological Processes	19	GO:0006479	protein methylation	19_GO:0008152 metabolic process	-3.3	6.1	5.1	20504	194	104	6	5.8	2.3	13433|16468|26914|50708|50709|56702	Dnmt1|Jarid2|Macroh2a1|H1f2|H1f4|H1f5	-2.6
D16_MCODE_ALL	GO Biological Processes	19	GO:0006333	chromatin assembly or disassembly	19_GO:0009987 cellular process	-3.3	7.8	5.5	20504	127	104	5	4.8	2.1	14958|26914|50708|50709|56702	H1f0|Macroh2a1|H1f2|H1f4|H1f5	-2.6
D16_MCODE_ALL	GO Biological Processes	19	GO:0042273	ribosomal large subunit biogenesis	19_GO:0009987 cellular process	-3.3	11	6	20504	72	104	4	3.8	1.9	64934|66229|69237|107071	Pes1|Rpl7l1|Gtpbp4|Wdr74	-2.6
D16_MCODE_ALL	GO Biological Processes	19	GO:1902883	negative regulation of response to oxidative stress	19_GO:0048519 negative regulation of biological process	-3.3	19	7.2	20504	31	104	3	2.9	1.6	26914|57320|68015	Macroh2a1|Park7|Trap1	-2.6
D16_MCODE_ALL	GO Biological Processes	19	GO:0045727	positive regulation of translation	19_GO:0048518 positive regulation of biological process	-3.3	7.5	5.3	20504	131	104	5	4.8	2.1	11991|14265|16341|55944|208643	Hnrnpd|Fmr1|Eif3e|Eif3d|Eif4g1	-2.6
D16_MCODE_ALL	GO Biological Processes	19	GO:0000377	RNA splicing, via transesterification reactions with bulged adenosine as nucleophile	19_GO:0008152 metabolic process	-3.2	4.9	4.7	20504	280	104	7	6.7	2.5	14265|15387|19205|53379|66055|68879|74351	Fmr1|Hnrnpk|Ptbp1|Hnrnpa2b1|Sf3b6|Prpf6|Ddx23	-2.6
D16_MCODE_ALL	GO Biological Processes	19	GO:0000398	mRNA splicing, via spliceosome	19_GO:0008152 metabolic process	-3.2	4.9	4.7	20504	280	104	7	6.7	2.5	14265|15387|19205|53379|66055|68879|74351	Fmr1|Hnrnpk|Ptbp1|Hnrnpa2b1|Sf3b6|Prpf6|Ddx23	-2.6
D16_MCODE_ALL	GO Biological Processes	19	GO:0000375	RNA splicing, via transesterification reactions	19_GO:0008152 metabolic process	-3.2	4.9	4.7	20504	280	104	7	6.7	2.5	14265|15387|19205|53379|66055|68879|74351	Fmr1|Hnrnpk|Ptbp1|Hnrnpa2b1|Sf3b6|Prpf6|Ddx23	-2.6
D16_MCODE_ALL	GO Biological Processes	19	GO:1902042	negative regulation of extrinsic apoptotic signaling pathway via death domain receptors	19_GO:0048519 negative regulation of biological process	-3.2	18	7.1	20504	32	104	3	2.9	1.6	14161|57320|99571	Fga|Park7|Fgg	-2.6
D16_MCODE_ALL	GO Biological Processes	19	GO:0050686	negative regulation of mRNA processing	19_GO:0048519 negative regulation of biological process	-3.2	18	7.1	20504	32	104	3	2.9	1.6	15387|19205|53379	Hnrnpk|Ptbp1|Hnrnpa2b1	-2.6
D16_MCODE_ALL	GO Biological Processes	19	GO:0051053	negative regulation of DNA metabolic process	19_GO:0048519 negative regulation of biological process	-3.2	7.5	5.3	20504	132	104	5	4.8	2.1	14958|15364|50708|50709|56702	H1f0|Hmga2|H1f2|H1f4|H1f5	-2.6
D16_MCODE_ALL	GO Biological Processes	19	GO:0071168	protein localization to chromatin	19_GO:0051179 localization	-3.2	18	6.9	20504	33	104	3	2.9	1.6	16468|26914|56702	Jarid2|Macroh2a1|H1f5	-2.5
D16_MCODE_ALL	GO Biological Processes	19	GO:0140694	non-membrane-bounded organelle assembly	19_GO:0009987 cellular process	-3.2	4.2	4.5	20504	374	104	8	7.7	2.6	20044|20085|23881|26934|71819|74778|229317|233871	Rps14|Rps19|G3bp2|Racgap1|Kif23|Rrp7a|Eif2a|Atxn2l	-2.5
D16_MCODE_ALL	GO Biological Processes	19	GO:0006397	mRNA processing	19_GO:0008152 metabolic process	-3.2	3.8	4.3	20504	470	104	9	8.7	2.8	14265|15387|19205|53379|59013|66055|67755|68879|74351	Fmr1|Hnrnpk|Ptbp1|Hnrnpa2b1|Hnrnph1|Sf3b6|Ddx47|Prpf6|Ddx23	-2.5
D16_MCODE_ALL	GO Molecular Functions	21	GO:0019842	vitamin binding		-3.2	7.2	5.2	20504	137	104	5	4.8	2.1	18451|18452|18822|26432|26433	P4ha1|P4ha2|Plod1|Plod2|Plod3	-2.5
D16_MCODE_ALL	GO Biological Processes	19	GO:0006338	chromatin remodeling	19_GO:0009987 cellular process	-3.2	5.7	4.9	20504	208	104	6	5.8	2.3	14958|16468|26914|50708|50709|56702	H1f0|Jarid2|Macroh2a1|H1f2|H1f4|H1f5	-2.5
D16_MCODE_ALL	GO Biological Processes	19	GO:0006325	chromatin organization	19_GO:0009987 cellular process	-3.1	3.7	4.3	20504	477	104	9	8.7	2.8	13433|14958|15364|16468|18140|26914|50708|50709|56702	Dnmt1|H1f0|Hmga2|Jarid2|Uhrf1|Macroh2a1|H1f2|H1f4|H1f5	-2.5
D16_MCODE_ALL	GO Biological Processes	19	GO:0032204	regulation of telomere maintenance	19_GO:0008152 metabolic process	-3.1	9.9	5.7	20504	80	104	4	3.8	1.9	11991|12464|30877|53379	Hnrnpd|Cct4|Gnl3|Hnrnpa2b1	-2.5
D16_MCODE_ALL	GO Biological Processes	19	GO:0043588	skin development	19_GO:0032502 developmental process	-3.1	4.7	4.6	20504	294	104	7	6.7	2.5	12825|12831|12832|12842|12843|26914|28114	Col3a1|Col5a1|Col5a2|Col1a1|Col1a2|Macroh2a1|Nsun2	-2.5
D16_MCODE_ALL	KEGG Pathway	24	ko05222	Small cell lung cancer		-3.1	9.5	5.5	20504	83	104	4	3.8	1.9	12826|12827|14268|226519	Col4a1|Col4a2|Fn1|Lamc1	-2.4
D16_MCODE_ALL	GO Biological Processes	19	GO:0008625	extrinsic apoptotic signaling pathway via death domain receptors	19_GO:0023052 signaling	-3.1	9.5	5.5	20504	83	104	4	3.8	1.9	14161|57320|67755|99571	Fga|Park7|Ddx47|Fgg	-2.4
D16_MCODE_ALL	GO Biological Processes	19	GO:0065004	protein-DNA complex assembly	19_GO:0009987 cellular process	-3.1	6.8	5	20504	145	104	5	4.8	2.1	14958|26914|50708|50709|56702	H1f0|Macroh2a1|H1f2|H1f4|H1f5	-2.4
D16_MCODE_ALL	GO Molecular Functions	21	GO:0036002	pre-mRNA binding		-3.1	16	6.5	20504	37	104	3	2.9	1.6	15387|19205|53379	Hnrnpk|Ptbp1|Hnrnpa2b1	-2.4
D16_MCODE_ALL	GO Molecular Functions	21	GO:0000217	DNA secondary structure binding		-3.1	16	6.5	20504	37	104	3	2.9	1.6	11991|14958|15364	Hnrnpd|H1f0|Hmga2	-2.4
D16_MCODE_ALL	GO Biological Processes	19	GO:0016572	histone phosphorylation	19_GO:0008152 metabolic process	-3.1	16	6.5	20504	37	104	3	2.9	1.6	14265|15364|26914	Fmr1|Hmga2|Macroh2a1	-2.4
D16_MCODE_ALL	GO Biological Processes	19	GO:0031060	regulation of histone methylation	19_GO:0008152 metabolic process	-3	9.3	5.5	20504	85	104	4	3.8	1.9	13433|16468|26914|56702	Dnmt1|Jarid2|Macroh2a1|H1f5	-2.4
D16_MCODE_ALL	GO Biological Processes	19	GO:0009066	aspartate family amino acid metabolic process	19_GO:0008152 metabolic process	-3	16	6.4	20504	38	104	3	2.9	1.6	26432|26433|27053	Plod2|Plod3|Asns	-2.4
D16_MCODE_ALL	KEGG Pathway	24	mmu05222	Small cell lung cancer		-3	9.2	5.4	20504	86	104	4	3.8	1.9	12826|12827|14268|226519	Col4a1|Col4a2|Fn1|Lamc1	-2.4
D16_MCODE_ALL	GO Molecular Functions	21	GO:0046332	SMAD binding		-3	9.2	5.4	20504	86	104	4	3.8	1.9	12825|12832|12843|15364	Col3a1|Col5a2|Col1a2|Hmga2	-2.4
D16_MCODE_ALL	GO Molecular Functions	21	GO:0016887	ATP hydrolysis activity		-3	5.3	4.6	20504	225	104	6	5.8	2.3	12464|14828|15525|18392|68015|71819	Cct4|Hspa5|Hspa4|Orc1|Trap1|Kif23	-2.3
D16_MCODE_ALL	GO Biological Processes	19	GO:0051567	histone H3-K9 methylation	19_GO:0008152 metabolic process	-3	15	6.3	20504	39	104	3	2.9	1.6	13433|16468|56702	Dnmt1|Jarid2|H1f5	-2.3
D16_MCODE_ALL	Reactome Gene Sets	6	R-MMU-5674135	MAP2K and MAPK activation		-3	15	6.3	20504	39	104	3	2.9	1.6	14161|14268|99571	Fga|Fn1|Fgg	-2.3
D16_MCODE_ALL	GO Molecular Functions	21	GO:0004386	helicase activity		-3	6.5	4.9	20504	151	104	5	4.8	2.1	67755|69663|71990|74351|234374	Ddx47|Ddx51|Ddx54|Ddx23|Ddx49	-2.3
D16_MCODE_ALL	GO Molecular Functions	21	GO:0051082	unfolded protein binding		-3	9	5.3	20504	88	104	4	3.8	1.9	12406|12464|14828|68015	Serpinh1|Cct4|Hspa5|Trap1	-2.3
D16_MCODE_ALL	GO Biological Processes	19	GO:0042398	cellular modified amino acid biosynthetic process	19_GO:0008152 metabolic process	-3	15	6.2	20504	40	104	3	2.9	1.6	26432|26433|57320	Plod2|Plod3|Park7	-2.3
D16_MCODE_ALL	GO Biological Processes	19	GO:0043414	macromolecule methylation	19_GO:0008152 metabolic process	-3	4.4	4.3	20504	314	104	7	6.7	2.5	13433|16468|26914|28114|50708|50709|56702	Dnmt1|Jarid2|Macroh2a1|Nsun2|H1f2|H1f4|H1f5	-2.3
D16_MCODE_ALL	GO Biological Processes	19	GO:0071560	cellular response to transforming growth factor beta stimulus	19_GO:0050896 response to stimulus	-3	5.2	4.5	20504	229	104	6	5.8	2.3	12825|12827|12843|13433|14118|14828	Col3a1|Col4a2|Col1a2|Dnmt1|Fbn1|Hspa5	-2.3
D16_MCODE_ALL	Reactome Gene Sets	6	R-MMU-975956	Nonsense Mediated Decay (NMD) independent of the Exon Junction Complex (EJC)		-2.9	8.8	5.3	20504	90	104	4	3.8	1.9	20044|20085|208643|267019	Rps14|Rps19|Eif4g1|Rps15a	-2.3
D16_MCODE_ALL	Reactome Gene Sets	6	R-MMU-6807878	COPI-mediated anterograde transport		-2.9	8.8	5.3	20504	90	104	4	3.8	1.9	12847|50797|59042|235661	Copa|Copb2|Cope|Dync1li1	-2.3
D16_MCODE_ALL	GO Molecular Functions	21	GO:0016922	nuclear receptor binding		-2.9	6.4	4.8	20504	155	104	5	4.8	2.1	13433|57320|68879|71990|223499	Dnmt1|Park7|Prpf6|Ddx54|Dcaf13	-2.3
D16_MCODE_ALL	GO Biological Processes	19	GO:0001824	blastocyst development	19_GO:0032502 developmental process	-2.9	6.3	4.7	20504	157	104	5	4.8	2.1	53414|66055|66229|74778|107071	Bysl|Sf3b6|Rpl7l1|Rrp7a|Wdr74	-2.3
D16_MCODE_ALL	GO Biological Processes	19	GO:0071559	response to transforming growth factor beta	19_GO:0050896 response to stimulus	-2.9	5.1	4.5	20504	234	104	6	5.8	2.3	12825|12827|12843|13433|14118|14828	Col3a1|Col4a2|Col1a2|Dnmt1|Fbn1|Hspa5	-2.3
D16_MCODE_ALL	GO Biological Processes	19	GO:0045927	positive regulation of growth	19_GO:0040007 growth	-2.9	4.3	4.3	20504	321	104	7	6.7	2.5	14268|15364|15387|19035|56702|208643|234374	Fn1|Hmga2|Hnrnpk|Ppib|H1f5|Eif4g1|Ddx49	-2.3
D16_MCODE_ALL	GO Biological Processes	19	GO:0043484	regulation of RNA splicing	19_GO:0008152 metabolic process	-2.9	6.2	4.7	20504	158	104	5	4.8	2.1	14265|15387|19205|53379|59013	Fmr1|Hnrnpk|Ptbp1|Hnrnpa2b1|Hnrnph1	-2.3
D16_MCODE_ALL	GO Biological Processes	19	GO:0034250	positive regulation of cellular amide metabolic process	19_GO:0048518 positive regulation of biological process	-2.9	6.2	4.7	20504	159	104	5	4.8	2.1	11991|14265|16341|55944|208643	Hnrnpd|Fmr1|Eif3e|Eif3d|Eif4g1	-2.2
D16_MCODE_ALL	GO Biological Processes	19	GO:0085029	extracellular matrix assembly	19_GO:0009987 cellular process	-2.9	14	6	20504	43	104	3	2.9	1.6	12825|12843|26433	Col3a1|Col1a2|Plod3	-2.2
D16_MCODE_ALL	Reactome Gene Sets	6	R-MMU-2559583	Cellular Senescence		-2.8	6.1	4.6	20504	162	104	5	4.8	2.1	14958|15364|50708|56702|326619	H1f0|Hmga2|H1f2|H1f5|H4c1	-2.2
D16_MCODE_ALL	GO Biological Processes	19	GO:1901998	toxin transport	19_GO:0051179 localization	-2.8	13	5.9	20504	44	104	3	2.9	1.6	12464|14828|50797	Cct4|Hspa5|Copb2	-2.2
D16_MCODE_ALL	GO Biological Processes	19	GO:0006457	protein folding	19_GO:0009987 cellular process	-2.8	6	4.6	20504	163	104	5	4.8	2.1	12464|14828|18453|19035|68015	Cct4|Hspa5|P4hb|Ppib|Trap1	-2.2
D16_MCODE_ALL	GO Biological Processes	19	GO:0016458	gene silencing	19_GO:0048519 negative regulation of biological process	-2.8	4.9	4.3	20504	243	104	6	5.8	2.3	13433|14265|14958|15364|53379|208643	Dnmt1|Fmr1|H1f0|Hmga2|Hnrnpa2b1|Eif4g1	-2.2
D16_MCODE_ALL	GO Biological Processes	19	GO:0006890	retrograde vesicle-mediated transport, Golgi to endoplasmic reticulum	19_GO:0051179 localization	-2.8	13	5.8	20504	45	104	3	2.9	1.6	12847|50797|59042	Copa|Copb2|Cope	-2.2
D16_MCODE_ALL	GO Biological Processes	19	GO:0043487	regulation of RNA stability	19_GO:0008152 metabolic process	-2.8	5.9	4.6	20504	166	104	5	4.8	2.1	11991|14265|28114|74326|234374	Hnrnpd|Fmr1|Nsun2|Hnrnpr|Ddx49	-2.2
D16_MCODE_ALL	GO Biological Processes	19	GO:1902882	regulation of response to oxidative stress	19_GO:0050896 response to stimulus	-2.8	8	5	20504	99	104	4	3.8	1.9	18453|26914|57320|68015	P4hb|Macroh2a1|Park7|Trap1	-2.2
D16_MCODE_ALL	GO Biological Processes	19	GO:0008631	intrinsic apoptotic signaling pathway in response to oxidative stress	19_GO:0023052 signaling	-2.8	13	5.7	20504	46	104	3	2.9	1.6	18453|57320|68015	P4hb|Park7|Trap1	-2.2
D16_MCODE_ALL	GO Biological Processes	19	GO:0090068	positive regulation of cell cycle process	19_GO:0048518 positive regulation of biological process	-2.8	4.8	4.3	20504	249	104	6	5.8	2.3	18392|26914|26934|71819|208643|235661	Orc1|Macroh2a1|Racgap1|Kif23|Eif4g1|Dync1li1	-2.2
D16_MCODE_ALL	GO Biological Processes	19	GO:0051100	negative regulation of binding	19_GO:0065007 biological regulation	-2.8	5.8	4.5	20504	169	104	5	4.8	2.1	15364|15387|15525|57320|69237	Hmga2|Hnrnpk|Hspa4|Park7|Gtpbp4	-2.1
D16_MCODE_ALL	GO Molecular Functions	21	GO:0005506	iron ion binding		-2.7	5.8	4.5	20504	171	104	5	4.8	2.1	18451|18452|18822|26432|26433	P4ha1|P4ha2|Plod1|Plod2|Plod3	-2.1
D16_MCODE_ALL	GO Biological Processes	19	GO:0031062	positive regulation of histone methylation	19_GO:0048518 positive regulation of biological process	-2.7	12	5.6	20504	48	104	3	2.9	1.6	13433|16468|56702	Dnmt1|Jarid2|H1f5	-2.1
D16_MCODE_ALL	GO Biological Processes	19	GO:0051972	regulation of telomerase activity	19_GO:0008152 metabolic process	-2.7	12	5.6	20504	48	104	3	2.9	1.6	11991|12464|53379	Hnrnpd|Cct4|Hnrnpa2b1	-2.1
D16_MCODE_ALL	GO Biological Processes	19	GO:0003382	epithelial cell morphogenesis	19_GO:0032502 developmental process	-2.7	12	5.6	20504	48	104	3	2.9	1.6	12819|12822|26433	Col15a1|Col18a1|Plod3	-2.1
D16_MCODE_ALL	Reactome Gene Sets	6	R-MMU-75153	Apoptotic execution phase		-2.7	12	5.6	20504	48	104	3	2.9	1.6	14958|50708|56702	H1f0|H1f2|H1f5	-2.1
D16_MCODE_ALL	Reactome Gene Sets	6	R-MMU-72165	mRNA Splicing - Minor Pathway		-2.7	12	5.6	20504	48	104	3	2.9	1.6	66055|68879|74351	Sf3b6|Prpf6|Ddx23	-2.1
D16_MCODE_ALL	GO Biological Processes	19	GO:0001501	skeletal system development	19_GO:0032502 developmental process	-2.7	3.2	3.8	20504	552	104	9	8.7	2.8	12406|12814|12825|12832|12842|12843|14118|15364|19035	Serpinh1|Col11a1|Col3a1|Col5a2|Col1a1|Col1a2|Fbn1|Hmga2|Ppib	-2.1
D16_MCODE_ALL	GO Biological Processes	19	GO:0031057	negative regulation of histone modification	19_GO:0048519 negative regulation of biological process	-2.7	12	5.5	20504	50	104	3	2.9	1.6	13433|16468|26914	Dnmt1|Jarid2|Macroh2a1	-2.1
D16_MCODE_ALL	GO Biological Processes	19	GO:0061647	histone H3-K9 modification	19_GO:0008152 metabolic process	-2.7	12	5.5	20504	50	104	3	2.9	1.6	13433|16468|56702	Dnmt1|Jarid2|H1f5	-2.1
D16_MCODE_ALL	CORUM	33	CORUM:3047	Parvulin-associated pre-rRNP complex		-2.7	12	5.5	20504	50	104	3	2.9	1.6	14268|64934|69237	Fn1|Pes1|Gtpbp4	-2.1
D16_MCODE_ALL	GO Molecular Functions	21	GO:0030331	estrogen receptor binding		-2.7	12	5.5	20504	50	104	3	2.9	1.6	13433|71990|223499	Dnmt1|Ddx54|Dcaf13	-2.1
D16_MCODE_ALL	GO Biological Processes	19	GO:0007369	gastrulation	19_GO:0032502 developmental process	-2.7	5.5	4.3	20504	178	104	5	4.8	2.1	12831|12832|14268|15364|26914	Col5a1|Col5a2|Fn1|Hmga2|Macroh2a1	-2.1
D16_MCODE_ALL	GO Biological Processes	19	GO:1901605	alpha-amino acid metabolic process	19_GO:0008152 metabolic process	-2.7	5.5	4.3	20504	178	104	5	4.8	2.1	26432|26433|27053|57320|69719	Plod2|Plod3|Asns|Park7|Cad	-2.1
D16_MCODE_ALL	GO Biological Processes	19	GO:0001944	vasculature development	19_GO:0032502 developmental process	-2.7	2.7	3.6	20504	789	104	11	11	3	12819|12822|12825|12826|12827|12831|12842|12843|13433|14268|15364	Col15a1|Col18a1|Col3a1|Col4a1|Col4a2|Col5a1|Col1a1|Col1a2|Dnmt1|Fn1|Hmga2	-2.1
D16_MCODE_ALL	GO Biological Processes	19	GO:0031058	positive regulation of histone modification	19_GO:0048518 positive regulation of biological process	-2.7	7.3	4.7	20504	108	104	4	3.8	1.9	13433|14265|16468|56702	Dnmt1|Fmr1|Jarid2|H1f5	-2.1
D16_MCODE_ALL	GO Biological Processes	19	GO:0070527	platelet aggregation	19_GO:0022610 biological adhesion	-2.6	11	5.3	20504	52	104	3	2.9	1.6	14161|14268|99571	Fga|Fn1|Fgg	-2
D16_MCODE_ALL	GO Biological Processes	19	GO:0045814	negative regulation of gene expression, epigenetic	19_GO:0048519 negative regulation of biological process	-2.6	11	5.3	20504	52	104	3	2.9	1.6	13433|15364|26914	Dnmt1|Hmga2|Macroh2a1	-2
D16_MCODE_ALL	GO Biological Processes	19	GO:1902041	regulation of extrinsic apoptotic signaling pathway via death domain receptors	19_GO:0023052 signaling	-2.6	11	5.3	20504	52	104	3	2.9	1.6	14161|57320|99571	Fga|Park7|Fgg	-2
D16_MCODE_ALL	Reactome Gene Sets	6	R-MMU-975957	Nonsense Mediated Decay (NMD) enhanced by the Exon Junction Complex (EJC)		-2.6	7.2	4.6	20504	110	104	4	3.8	1.9	20044|20085|208643|267019	Rps14|Rps19|Eif4g1|Rps15a	-2
D16_MCODE_ALL	Reactome Gene Sets	6	R-MMU-927802	Nonsense-Mediated Decay (NMD)		-2.6	7.2	4.6	20504	110	104	4	3.8	1.9	20044|20085|208643|267019	Rps14|Rps19|Eif4g1|Rps15a	-2
D16_MCODE_ALL	GO Biological Processes	19	GO:0048024	regulation of mRNA splicing, via spliceosome	19_GO:0008152 metabolic process	-2.6	7.1	4.6	20504	111	104	4	3.8	1.9	14265|15387|19205|53379	Fmr1|Hnrnpk|Ptbp1|Hnrnpa2b1	-2
D16_MCODE_ALL	GO Biological Processes	19	GO:2000351	regulation of endothelial cell apoptotic process	19_GO:0050789 regulation of biological process	-2.6	11	5.3	20504	53	104	3	2.9	1.6	12822|14161|99571	Col18a1|Fga|Fgg	-2
D16_MCODE_ALL	GO Molecular Functions	21	GO:0002020	protease binding		-2.6	5.4	4.2	20504	184	104	5	4.8	2.1	12825|12842|12843|14268|57320	Col3a1|Col1a1|Col1a2|Fn1|Park7	-2
D16_MCODE_ALL	GO Biological Processes	19	GO:0032259	methylation	19_GO:0008152 metabolic process	-2.6	3.8	3.8	20504	363	104	7	6.7	2.5	13433|16468|26914|28114|50708|50709|56702	Dnmt1|Jarid2|Macroh2a1|Nsun2|H1f2|H1f4|H1f5	-2
D16_MCODE_ALL	GO Biological Processes	19	GO:0042594	response to starvation	19_GO:0050896 response to stimulus	-2.6	5.3	4.2	20504	185	104	5	4.8	2.1	14828|27053|107045|216443|229317	Hspa5|Asns|Lars|Mars1|Eif2a	-2
D16_MCODE_ALL	GO Biological Processes	19	GO:0000018	regulation of DNA recombination	19_GO:0008152 metabolic process	-2.6	7	4.6	20504	112	104	4	3.8	1.9	14958|50708|50709|56702	H1f0|H1f2|H1f4|H1f5	-2
D16_MCODE_ALL	GO Biological Processes	19	GO:0031589	cell-substrate adhesion	19_GO:0022610 biological adhesion	-2.6	3.8	3.8	20504	366	104	7	6.7	2.5	12825|12842|14161|14268|18453|99571|226519	Col3a1|Col1a1|Fga|Fn1|P4hb|Fgg|Lamc1	-2
D16_MCODE_ALL	GO Biological Processes	19	GO:0006401	RNA catabolic process	19_GO:0008152 metabolic process	-2.6	4.3	4	20504	273	104	6	5.8	2.3	11991|14265|16341|28114|74326|234374	Hnrnpd|Fmr1|Eif3e|Nsun2|Hnrnpr|Ddx49	-2
D16_MCODE_ALL	GO Biological Processes	19	GO:0051702	biological process involved in interaction with symbiont	19_GO:0044419 biological process involved in interspecies interaction between organisms	-2.6	6.9	4.5	20504	114	104	4	3.8	1.9	14265|14268|15364|19035	Fmr1|Fn1|Hmga2|Ppib	-2
D16_MCODE_ALL	GO Biological Processes	19	GO:0050821	protein stabilization	19_GO:0065007 biological regulation	-2.5	5.2	4.1	20504	190	104	5	4.8	2.1	12464|19035|56702|57320|69237	Cct4|Ppib|H1f5|Park7|Gtpbp4	-2
D16_MCODE_ALL	GO Biological Processes	19	GO:0072577	endothelial cell apoptotic process	19_GO:0009987 cellular process	-2.5	11	5.1	20504	56	104	3	2.9	1.6	12822|14161|99571	Col18a1|Fga|Fgg	-2
D16_MCODE_ALL	GO Biological Processes	19	GO:0002062	chondrocyte differentiation	19_GO:0032502 developmental process	-2.5	6.8	4.5	20504	116	104	4	3.8	1.9	12406|12814|12825|15364	Serpinh1|Col11a1|Col3a1|Hmga2	-2
D16_MCODE_ALL	GO Biological Processes	19	GO:0071824	protein-DNA complex subunit organization	19_GO:0009987 cellular process	-2.5	5.1	4.1	20504	192	104	5	4.8	2.1	14958|26914|50708|50709|56702	H1f0|Macroh2a1|H1f2|H1f4|H1f5	-1.9
D16_MCODE_ALL	GO Biological Processes	19	GO:0051028	mRNA transport	19_GO:0051179 localization	-2.5	6.7	4.4	20504	117	104	4	3.8	1.9	14265|23881|28114|53379	Fmr1|G3bp2|Nsun2|Hnrnpa2b1	-1.9
D16_MCODE_ALL	GO Biological Processes	19	GO:0031669	cellular response to nutrient levels	19_GO:0050896 response to stimulus	-2.5	5	4	20504	199	104	5	4.8	2.1	14828|27053|107045|208643|216443	Hspa5|Asns|Lars|Eif4g1|Mars1	-1.9
D16_MCODE_ALL	GO Biological Processes	19	GO:0061448	connective tissue development	19_GO:0032502 developmental process	-2.5	4.1	3.8	20504	288	104	6	5.8	2.3	12406|12814|12825|12831|12842|15364	Serpinh1|Col11a1|Col3a1|Col5a1|Col1a1|Hmga2	-1.9
D16_MCODE_ALL	GO Biological Processes	19	GO:0040029	regulation of gene expression, epigenetic	19_GO:0008152 metabolic process	-2.4	6.4	4.3	20504	123	104	4	3.8	1.9	13433|15364|16468|26914	Dnmt1|Hmga2|Jarid2|Macroh2a1	-1.9
D16_MCODE_ALL	GO Molecular Functions	21	GO:0003697	single-stranded DNA binding		-2.4	6.4	4.3	20504	123	104	4	3.8	1.9	15387|19205|50926|53379	Hnrnpk|Ptbp1|Hnrnpdl|Hnrnpa2b1	-1.9
D16_MCODE_ALL	GO Biological Processes	19	GO:0051851	modulation by host of symbiont process	19_GO:0044419 biological process involved in interspecies interaction between organisms	-2.4	9.7	4.9	20504	61	104	3	2.9	1.6	14265|15364|19035	Fmr1|Hmga2|Ppib	-1.9
D16_MCODE_ALL	GO Biological Processes	19	GO:1903311	regulation of mRNA metabolic process	19_GO:0008152 metabolic process	-2.4	4	3.7	20504	293	104	6	5.8	2.3	11991|14265|15387|19205|53379|74326	Hnrnpd|Fmr1|Hnrnpk|Ptbp1|Hnrnpa2b1|Hnrnpr	-1.9
D16_MCODE_ALL	GO Biological Processes	19	GO:0006446	regulation of translational initiation	19_GO:0008152 metabolic process	-2.4	9.5	4.8	20504	62	104	3	2.9	1.6	14265|27979|208643	Fmr1|Eif3b|Eif4g1	-1.8
D16_MCODE_ALL	GO Biological Processes	19	GO:0000723	telomere maintenance	19_GO:0008152 metabolic process	-2.4	6.3	4.2	20504	126	104	4	3.8	1.9	11991|12464|30877|53379	Hnrnpd|Cct4|Gnl3|Hnrnpa2b1	-1.8
D16_MCODE_ALL	Reactome Gene Sets	6	R-MMU-2262752	Cellular responses to stress		-2.4	3.2	3.5	20504	499	104	8	7.7	2.6	14828|14958|15364|18453|50708|56702|235661|326619	Hspa5|H1f0|Hmga2|P4hb|H1f2|H1f5|Dync1li1|H4c1	-1.8
D16_MCODE_ALL	GO Molecular Functions	21	GO:0050839	cell adhesion molecule binding		-2.4	4	3.7	20504	295	104	6	5.8	2.3	12825|14118|14161|14268|18453|99571	Col3a1|Fbn1|Fga|Fn1|P4hb|Fgg	-1.8
D16_MCODE_ALL	GO Biological Processes	19	GO:0071496	cellular response to external stimulus	19_GO:0050896 response to stimulus	-2.4	4	3.7	20504	295	104	6	5.8	2.3	12842|14828|27053|107045|208643|216443	Col1a1|Hspa5|Asns|Lars|Eif4g1|Mars1	-1.8
D16_MCODE_ALL	GO Biological Processes	19	GO:0051101	regulation of DNA binding	19_GO:0065007 biological regulation	-2.4	6.2	4.2	20504	127	104	4	3.8	1.9	14958|15364|15525|57320	H1f0|Hmga2|Hspa4|Park7	-1.8
D16_MCODE_ALL	GO Biological Processes	19	GO:0030307	positive regulation of cell growth	19_GO:0040007 growth	-2.4	4.8	3.9	20504	206	104	5	4.8	2.1	14268|15387|56702|208643|234374	Fn1|Hnrnpk|H1f5|Eif4g1|Ddx49	-1.8
D16_MCODE_ALL	GO Biological Processes	19	GO:1902750	negative regulation of cell cycle G2/M phase transition	19_GO:0048519 negative regulation of biological process	-2.4	9.4	4.8	20504	63	104	3	2.9	1.6	15364|18392|26914	Hmga2|Orc1|Macroh2a1	-1.8
D16_MCODE_ALL	Reactome Gene Sets	6	R-MMU-8953897	Cellular responses to stimuli		-2.4	3.1	3.5	20504	502	104	8	7.7	2.6	14828|14958|15364|18453|50708|56702|235661|326619	Hspa5|H1f0|Hmga2|P4hb|H1f2|H1f5|Dync1li1|H4c1	-1.8
D16_MCODE_ALL	GO Molecular Functions	21	GO:0016597	amino acid binding		-2.4	9.2	4.7	20504	64	104	3	2.9	1.6	69719|104458|232087	Cad|Rars|Mat2a	-1.8
D16_MCODE_ALL	GO Biological Processes	19	GO:0032200	telomere organization	19_GO:0009987 cellular process	-2.3	6	4.1	20504	131	104	4	3.8	1.9	11991|12464|30877|53379	Hnrnpd|Cct4|Gnl3|Hnrnpa2b1	-1.8
D16_MCODE_ALL	GO Biological Processes	19	GO:0051216	cartilage development	19_GO:0032502 developmental process	-2.3	4.6	3.8	20504	212	104	5	4.8	2.1	12406|12814|12825|12842|15364	Serpinh1|Col11a1|Col3a1|Col1a1|Hmga2	-1.8
D16_MCODE_ALL	GO Biological Processes	19	GO:0060350	endochondral bone morphogenesis	19_GO:0032502 developmental process	-2.3	9	4.6	20504	66	104	3	2.9	1.6	12406|12825|12842	Serpinh1|Col3a1|Col1a1	-1.8
D16_MCODE_ALL	KEGG Pathway	24	ko03040	Spliceosome		-2.3	5.9	4.1	20504	133	104	4	3.8	1.9	15387|66055|68879|74351	Hnrnpk|Sf3b6|Prpf6|Ddx23	-1.8
D16_MCODE_ALL	KEGG Pathway	24	mmu03040	Spliceosome		-2.3	5.9	4.1	20504	133	104	4	3.8	1.9	15387|66055|68879|74351	Hnrnpk|Sf3b6|Prpf6|Ddx23	-1.8
D16_MCODE_ALL	GO Biological Processes	19	GO:0051817	modulation of process of other organism involved in symbiotic interaction	19_GO:0044419 biological process involved in interspecies interaction between organisms	-2.3	8.8	4.6	20504	67	104	3	2.9	1.6	14265|15364|19035	Fmr1|Hmga2|Ppib	-1.8
D16_MCODE_ALL	GO Biological Processes	19	GO:0001568	blood vessel development	19_GO:0032502 developmental process	-2.3	2.6	3.2	20504	752	104	10	9.6	2.9	12819|12822|12825|12826|12827|12831|12842|12843|14268|15364	Col15a1|Col18a1|Col3a1|Col4a1|Col4a2|Col5a1|Col1a1|Col1a2|Fn1|Hmga2	-1.8
D16_MCODE_ALL	GO Biological Processes	19	GO:0097435	supramolecular fiber organization	19_GO:0009987 cellular process	-2.3	2.6	3.2	20504	756	104	10	9.6	2.9	12406|12814|12825|12831|12832|12842|12843|18451|26433|234407	Serpinh1|Col11a1|Col3a1|Col5a1|Col5a2|Col1a1|Col1a2|P4ha1|Plod3|Colgalt1	-1.7
D16_MCODE_ALL	Reactome Gene Sets	6	R-MMU-199977	ER to Golgi Anterograde Transport		-2.2	5.6	3.9	20504	142	104	4	3.8	1.9	12847|50797|59042|235661	Copa|Copb2|Cope|Dync1li1	-1.7
D16_MCODE_ALL	GO Molecular Functions	21	GO:0005178	integrin binding		-2.2	5.6	3.9	20504	142	104	4	3.8	1.9	12825|14118|14268|18453	Col3a1|Fbn1|Fn1|P4hb	-1.7
D16_MCODE_ALL	Reactome Gene Sets	6	R-MMU-212300	PRC2 methylates histones and DNA		-2.2	8	4.3	20504	74	104	3	2.9	1.6	13433|16468|326619	Dnmt1|Jarid2|H4c1	-1.7
D16_MCODE_ALL	GO Biological Processes	19	GO:1902369	negative regulation of RNA catabolic process	19_GO:0048519 negative regulation of biological process	-2.2	8	4.3	20504	74	104	3	2.9	1.6	11991|14265|28114	Hnrnpd|Fmr1|Nsun2	-1.7
D16_MCODE_ALL	GO Biological Processes	19	GO:0060968	regulation of gene silencing	19_GO:0048519 negative regulation of biological process	-2.2	8	4.3	20504	74	104	3	2.9	1.6	13433|14265|208643	Dnmt1|Fmr1|Eif4g1	-1.7
D16_MCODE_ALL	GO Biological Processes	19	GO:0031668	cellular response to extracellular stimulus	19_GO:0050896 response to stimulus	-2.2	4.3	3.6	20504	231	104	5	4.8	2.1	14828|27053|107045|208643|216443	Hspa5|Asns|Lars|Eif4g1|Mars1	-1.7
D16_MCODE_ALL	GO Biological Processes	19	GO:0001885	endothelial cell development	19_GO:0032502 developmental process	-2.2	7.9	4.3	20504	75	104	3	2.9	1.6	12819|12822|26433	Col15a1|Col18a1|Plod3	-1.7
D16_MCODE_ALL	GO Molecular Functions	21	GO:0061629	RNA polymerase II-specific DNA-binding transcription factor binding		-2.2	3.6	3.4	20504	329	104	6	5.8	2.3	13433|15525|57320|68879|71990|223499	Dnmt1|Hspa4|Park7|Prpf6|Ddx54|Dcaf13	-1.6
D16_MCODE_ALL	GO Biological Processes	19	GO:0050658	RNA transport	19_GO:0051179 localization	-2.2	5.4	3.8	20504	147	104	4	3.8	1.9	14265|23881|28114|53379	Fmr1|G3bp2|Nsun2|Hnrnpa2b1	-1.6
D16_MCODE_ALL	GO Biological Processes	19	GO:0050657	nucleic acid transport	19_GO:0051179 localization	-2.2	5.4	3.8	20504	147	104	4	3.8	1.9	14265|23881|28114|53379	Fmr1|G3bp2|Nsun2|Hnrnpa2b1	-1.6
D16_MCODE_ALL	GO Biological Processes	19	GO:0050684	regulation of mRNA processing	19_GO:0008152 metabolic process	-2.2	5.3	3.8	20504	149	104	4	3.8	1.9	14265|15387|19205|53379	Fmr1|Hnrnpk|Ptbp1|Hnrnpa2b1	-1.6
D16_MCODE_ALL	GO Biological Processes	19	GO:0051236	establishment of RNA localization	19_GO:0051179 localization	-2.1	5.3	3.7	20504	150	104	4	3.8	1.9	14265|23881|28114|53379	Fmr1|G3bp2|Nsun2|Hnrnpa2b1	-1.6
D16_MCODE_ALL	GO Biological Processes	19	GO:0001701	in utero embryonic development	19_GO:0032502 developmental process	-2.1	2.8	3.1	20504	556	104	8	7.7	2.6	12825|26433|28114|53414|66055|66229|74778|107071	Col3a1|Plod3|Nsun2|Bysl|Sf3b6|Rpl7l1|Rrp7a|Wdr74	-1.6
D16_MCODE_ALL	GO Biological Processes	19	GO:1903201	regulation of oxidative stress-induced cell death	19_GO:0050896 response to stimulus	-2.1	7.5	4.1	20504	79	104	3	2.9	1.6	18453|57320|68015	P4hb|Park7|Trap1	-1.6
D16_MCODE_ALL	GO Biological Processes	19	GO:0034109	homotypic cell-cell adhesion	19_GO:0022610 biological adhesion	-2.1	7.5	4.1	20504	79	104	3	2.9	1.6	14161|14268|99571	Fga|Fn1|Fgg	-1.6
D16_MCODE_ALL	Reactome Gene Sets	6	R-MMU-76002	Platelet activation, signaling and aggregation		-2.1	4.1	3.4	20504	241	104	5	4.8	2.1	12842|12843|14161|14268|99571	Col1a1|Col1a2|Fga|Fn1|Fgg	-1.6
D16_MCODE_ALL	GO Molecular Functions	21	GO:0005518	collagen binding		-2.1	7.4	4.1	20504	80	104	3	2.9	1.6	12406|12833|12834	Serpinh1|Col6a1|Col6a2	-1.6
D16_MCODE_ALL	GO Biological Processes	19	GO:1901988	negative regulation of cell cycle phase transition	19_GO:0048519 negative regulation of biological process	-2.1	4.1	3.4	20504	243	104	5	4.8	2.1	15364|18392|26914|28114|235661	Hmga2|Orc1|Macroh2a1|Nsun2|Dync1li1	-1.6
D16_MCODE_ALL	Reactome Gene Sets	6	R-MMU-3108232	SUMO E3 ligases SUMOylate target proteins		-2.1	5.1	3.6	20504	155	104	4	3.8	1.9	13433|15387|57320|326619	Dnmt1|Hnrnpk|Park7|H4c1	-1.6
D16_MCODE_ALL	GO Biological Processes	19	GO:0060348	bone development	19_GO:0032502 developmental process	-2.1	4	3.4	20504	244	104	5	4.8	2.1	12406|12825|12842|14118|19035	Serpinh1|Col3a1|Col1a1|Fbn1|Ppib	-1.6
D16_MCODE_ALL	GO Biological Processes	19	GO:0031330	negative regulation of cellular catabolic process	19_GO:0048519 negative regulation of biological process	-2.1	4	3.4	20504	245	104	5	4.8	2.1	11991|14265|28114|57320|208643	Hnrnpd|Fmr1|Nsun2|Park7|Eif4g1	-1.6
D16_MCODE_ALL	Reactome Gene Sets	6	R-MMU-1266738	Developmental Biology		-2.1	3	3.1	20504	454	104	7	6.7	2.5	12825|12826|12827|12831|12832|12833|12834	Col3a1|Col4a1|Col4a2|Col5a1|Col5a2|Col6a1|Col6a2	-1.6
D16_MCODE_ALL	GO Biological Processes	19	GO:0000070	mitotic sister chromatid segregation	19_GO:0009987 cellular process	-2.1	5	3.6	20504	159	104	4	3.8	1.9	26914|26934|71819|235661	Macroh2a1|Racgap1|Kif23|Dync1li1	-1.5
D16_MCODE_ALL	Reactome Gene Sets	6	R-MMU-2990846	SUMOylation		-2	4.9	3.6	20504	160	104	4	3.8	1.9	13433|15387|57320|326619	Dnmt1|Hnrnpk|Park7|H4c1	-1.5
D16_MCODE_ALL	GO Molecular Functions	21	GO:0016462	pyrophosphatase activity		-2	2.7	3	20504	577	104	8	7.7	2.6	12464|14828|15525|18392|68015|69237|71819|353172	Cct4|Hspa5|Hspa4|Orc1|Trap1|Gtpbp4|Kif23|Gars	-1.5
D16_MCODE_ALL	GO Biological Processes	19	GO:0034976	response to endoplasmic reticulum stress	19_GO:0050896 response to stimulus	-2	3.9	3.3	20504	254	104	5	4.8	2.1	14828|18453|57320|208643|229317	Hspa5|P4hb|Park7|Eif4g1|Eif2a	-1.5
D16_MCODE_ALL	GO Biological Processes	19	GO:0009267	cellular response to starvation	19_GO:0050896 response to stimulus	-2	4.8	3.5	20504	164	104	4	3.8	1.9	14828|27053|107045|216443	Hspa5|Asns|Lars|Mars1	-1.5
D16_MCODE_ALL	GO Biological Processes	19	GO:0031667	response to nutrient levels	19_GO:0050896 response to stimulus	-2	3.3	3.1	20504	358	104	6	5.8	2.3	14828|27053|107045|208643|216443|229317	Hspa5|Asns|Lars|Eif4g1|Mars1|Eif2a	-1.5
D16_MCODE_ALL	GO Biological Processes	19	GO:0030168	platelet activation	19_GO:0032501 multicellular organismal process	-2	6.8	3.9	20504	87	104	3	2.9	1.6	14161|14268|99571	Fga|Fn1|Fgg	-1.5
D16_MCODE_ALL	GO Molecular Functions	21	GO:0016818	hydrolase activity, acting on acid anhydrides, in phosphorus-containing anhydrides		-2	2.7	3	20504	586	104	8	7.7	2.6	12464|14828|15525|18392|68015|69237|71819|353172	Cct4|Hspa5|Hspa4|Orc1|Trap1|Gtpbp4|Kif23|Gars	-1.5
D16_SUB1_MCODE_1	Reactome Gene Sets	6	R-MMU-8953854	Metabolism of RNA		-21	23	20	20504	546	29	18	62	9	11991|15387|20085|53379|53414|59013|66055|68879|72515|72554|74326|74351|74778|75416|208643|217995|223499|234374	Hnrnpd|Hnrnpk|Rps19|Hnrnpa2b1|Bysl|Hnrnph1|Sf3b6|Prpf6|Wdr43|Utp14a|Hnrnpr|Ddx23|Rrp7a|Nop14|Eif4g1|Heatr1|Dcaf13|Ddx49	-19
D16_SUB1_MCODE_1	GO Biological Processes	19	GO:0022613	ribonucleoprotein complex biogenesis	19_GO:0009987 cellular process	-20	27	20	20504	412	29	16	55	9.2	13669|20085|53414|55944|66229|68879|71990|72515|72554|74778|75416|107071|217995|223499|229317|234374	Eif3a|Rps19|Bysl|Eif3d|Rpl7l1|Prpf6|Ddx54|Wdr43|Utp14a|Rrp7a|Nop14|Wdr74|Heatr1|Dcaf13|Eif2a|Ddx49	-18
D16_SUB1_MCODE_1	GO Biological Processes	19	GO:0042254	ribosome biogenesis	19_GO:0009987 cellular process	-16	31	20	20504	296	29	13	45	9.2	20085|53414|66229|71990|72515|72554|74778|75416|107071|217995|223499|229317|234374	Rps19|Bysl|Rpl7l1|Ddx54|Wdr43|Utp14a|Rrp7a|Nop14|Wdr74|Heatr1|Dcaf13|Eif2a|Ddx49	-14
D16_SUB1_MCODE_1	GO Biological Processes	19	GO:0006364	rRNA processing	19_GO:0008152 metabolic process	-16	40	21	20504	214	29	12	41	9.1	20085|53414|66229|71990|72515|72554|74778|75416|107071|217995|223499|234374	Rps19|Bysl|Rpl7l1|Ddx54|Wdr43|Utp14a|Rrp7a|Nop14|Wdr74|Heatr1|Dcaf13|Ddx49	-14
D16_SUB1_MCODE_1	GO Biological Processes	19	GO:0016072	rRNA metabolic process	19_GO:0008152 metabolic process	-16	38	21	20504	224	29	12	41	9.1	20085|53414|66229|71990|72515|72554|74778|75416|107071|217995|223499|234374	Rps19|Bysl|Rpl7l1|Ddx54|Wdr43|Utp14a|Rrp7a|Nop14|Wdr74|Heatr1|Dcaf13|Ddx49	-14
D16_SUB1_MCODE_1	GO Biological Processes	19	GO:0034470	ncRNA processing	19_GO:0008152 metabolic process	-15	25	18	20504	362	29	13	45	9.2	20085|53379|53414|66229|71990|72515|72554|74778|75416|107071|217995|223499|234374	Rps19|Hnrnpa2b1|Bysl|Rpl7l1|Ddx54|Wdr43|Utp14a|Rrp7a|Nop14|Wdr74|Heatr1|Dcaf13|Ddx49	-13
D16_SUB1_MCODE_1	Reactome Gene Sets	6	R-MMU-72649	Translation initiation complex formation		-14	99	28	20504	57	29	8	28	8.3	13669|16341|20085|27979|55944|56347|208643|223691	Eif3a|Eif3e|Rps19|Eif3b|Eif3d|Eif3c|Eif4g1|Eif3l	-12
D16_SUB1_MCODE_1	Reactome Gene Sets	6	R-MMU-72702	Ribosomal scanning and start codon recognition		-14	99	28	20504	57	29	8	28	8.3	13669|16341|20085|27979|55944|56347|208643|223691	Eif3a|Eif3e|Rps19|Eif3b|Eif3d|Eif3c|Eif4g1|Eif3l	-12
D16_SUB1_MCODE_1	Reactome Gene Sets	6	R-MMU-72662	Activation of the mRNA upon binding of the cap-binding complex and eIFs, and subsequent binding to 43S		-14	98	28	20504	58	29	8	28	8.3	13669|16341|20085|27979|55944|56347|208643|223691	Eif3a|Eif3e|Rps19|Eif3b|Eif3d|Eif3c|Eif4g1|Eif3l	-12
D16_SUB1_MCODE_1	GO Biological Processes	19	GO:0034660	ncRNA metabolic process	19_GO:0008152 metabolic process	-14	20	16	20504	456	29	13	45	9.2	20085|53379|53414|66229|71990|72515|72554|74778|75416|107071|217995|223499|234374	Rps19|Hnrnpa2b1|Bysl|Rpl7l1|Ddx54|Wdr43|Utp14a|Rrp7a|Nop14|Wdr74|Heatr1|Dcaf13|Ddx49	-12
D16_SUB1_MCODE_1	GO Molecular Functions	21	GO:0003743	translation initiation factor activity		-14	93	27	20504	61	29	8	28	8.3	13669|16341|27979|55944|56347|208643|223691|229317	Eif3a|Eif3e|Eif3b|Eif3d|Eif3c|Eif4g1|Eif3l|Eif2a	-12
D16_SUB1_MCODE_1	GO Molecular Functions	21	GO:0008135	translation factor activity, RNA binding		-12	63	22	20504	90	29	8	28	8.3	13669|16341|27979|55944|56347|208643|223691|229317	Eif3a|Eif3e|Eif3b|Eif3d|Eif3c|Eif4g1|Eif3l|Eif2a	-11
D16_SUB1_MCODE_1	Reactome Gene Sets	6	R-MMU-72695	Formation of the ternary complex, and subsequently, the 43S complex		-12	99	26	20504	50	29	7	24	7.9	13669|16341|20085|27979|55944|56347|223691	Eif3a|Eif3e|Rps19|Eif3b|Eif3d|Eif3c|Eif3l	-11
D16_SUB1_MCODE_1	Reactome Gene Sets	6	R-MMU-72312	rRNA processing		-12	37	18	20504	171	29	9	31	8.6	20085|53414|72515|72554|74778|75416|217995|223499|234374	Rps19|Bysl|Wdr43|Utp14a|Rrp7a|Nop14|Heatr1|Dcaf13|Ddx49	-10
D16_SUB1_MCODE_1	Reactome Gene Sets	6	R-MMU-8868773	rRNA processing in the nucleus and cytosol		-12	37	18	20504	171	29	9	31	8.6	20085|53414|72515|72554|74778|75416|217995|223499|234374	Rps19|Bysl|Wdr43|Utp14a|Rrp7a|Nop14|Heatr1|Dcaf13|Ddx49	-10
D16_SUB1_MCODE_1	Reactome Gene Sets	6	R-MMU-6791226	Major pathway of rRNA processing in the nucleolus and cytosol		-12	37	18	20504	171	29	9	31	8.6	20085|53414|72515|72554|74778|75416|217995|223499|234374	Rps19|Bysl|Wdr43|Utp14a|Rrp7a|Nop14|Heatr1|Dcaf13|Ddx49	-10
D16_SUB1_MCODE_1	Reactome Gene Sets	6	R-MMU-156827	L13a-mediated translational silencing of Ceruloplasmin expression		-12	53	20	20504	107	29	8	28	8.3	13669|16341|20085|27979|55944|56347|208643|223691	Eif3a|Eif3e|Rps19|Eif3b|Eif3d|Eif3c|Eif4g1|Eif3l	-10
D16_SUB1_MCODE_1	GO Molecular Functions	21	GO:0090079	translation regulator activity, nucleic acid binding		-12	52	20	20504	108	29	8	28	8.3	13669|16341|27979|55944|56347|208643|223691|229317	Eif3a|Eif3e|Eif3b|Eif3d|Eif3c|Eif4g1|Eif3l|Eif2a	-10
D16_SUB1_MCODE_1	Reactome Gene Sets	6	R-MMU-72706	GTP hydrolysis and joining of the 60S ribosomal subunit		-12	52	20	20504	108	29	8	28	8.3	13669|16341|20085|27979|55944|56347|208643|223691	Eif3a|Eif3e|Rps19|Eif3b|Eif3d|Eif3c|Eif4g1|Eif3l	-10
D16_SUB1_MCODE_1	Reactome Gene Sets	6	R-MMU-72737	Cap-dependent Translation Initiation		-12	49	20	20504	115	29	8	28	8.3	13669|16341|20085|27979|55944|56347|208643|223691	Eif3a|Eif3e|Rps19|Eif3b|Eif3d|Eif3c|Eif4g1|Eif3l	-10
D16_SUB1_MCODE_1	Reactome Gene Sets	6	R-MMU-72613	Eukaryotic Translation Initiation		-12	49	20	20504	115	29	8	28	8.3	13669|16341|20085|27979|55944|56347|208643|223691	Eif3a|Eif3e|Rps19|Eif3b|Eif3d|Eif3c|Eif4g1|Eif3l	-10
D16_SUB1_MCODE_1	GO Biological Processes	19	GO:0006413	translational initiation	19_GO:0008152 metabolic process	-11	48	19	20504	119	29	8	28	8.3	13669|16341|27979|55944|56347|208643|223691|229317	Eif3a|Eif3e|Eif3b|Eif3d|Eif3c|Eif4g1|Eif3l|Eif2a	-9.9
D16_SUB1_MCODE_1	GO Molecular Functions	21	GO:0045182	translation regulator activity		-11	40	18	20504	141	29	8	28	8.3	13669|16341|27979|55944|56347|208643|223691|229317	Eif3a|Eif3e|Eif3b|Eif3d|Eif3c|Eif4g1|Eif3l|Eif2a	-9.3
D16_SUB1_MCODE_1	GO Biological Processes	19	GO:0075525	viral translational termination-reinitiation	19_GO:0016032 viral process	-11	570	48	20504	5	29	4	14	6.4	13669|27979|55944|223691	Eif3a|Eif3b|Eif3d|Eif3l	-9.3
D16_SUB1_MCODE_1	GO Biological Processes	19	GO:0019081	viral translation	19_GO:0016032 viral process	-11	210	32	20504	17	29	5	17	7	13669|19205|27979|55944|223691	Eif3a|Ptbp1|Eif3b|Eif3d|Eif3l	-9.1
D16_SUB1_MCODE_1	GO Molecular Functions	21	GO:0003729	mRNA binding		-10	19	13	20504	366	29	10	34	8.8	11991|13669|15387|19205|53379|55944|66055|74326|208643|229317	Hnrnpd|Eif3a|Hnrnpk|Ptbp1|Hnrnpa2b1|Eif3d|Sf3b6|Hnrnpr|Eif4g1|Eif2a	-8.9
D16_SUB1_MCODE_1	Reactome Gene Sets	6	R-MMU-72689	Formation of a pool of free 40S subunits		-10	51	19	20504	97	29	7	24	7.9	13669|16341|20085|27979|55944|56347|223691	Eif3a|Eif3e|Rps19|Eif3b|Eif3d|Eif3c|Eif3l	-8.8
D16_SUB1_MCODE_1	WikiPathways	27	WP307	Translation factors		-10	87	23	20504	49	29	6	21	7.5	13669|16341|27979|55944|56347|208643	Eif3a|Eif3e|Eif3b|Eif3d|Eif3c|Eif4g1	-8.8
D16_SUB1_MCODE_1	Reactome Gene Sets	6	R-MMU-72163	mRNA Splicing - Major Pathway		-10	33	16	20504	172	29	8	28	8.3	11991|15387|53379|59013|66055|68879|74326|74351	Hnrnpd|Hnrnpk|Hnrnpa2b1|Hnrnph1|Sf3b6|Prpf6|Hnrnpr|Ddx23	-8.7
D16_SUB1_MCODE_1	Reactome Gene Sets	6	R-MMU-72172	mRNA Splicing		-10	32	16	20504	178	29	8	28	8.3	11991|15387|53379|59013|66055|68879|74326|74351	Hnrnpd|Hnrnpk|Hnrnpa2b1|Hnrnph1|Sf3b6|Prpf6|Hnrnpr|Ddx23	-8.6
D16_SUB1_MCODE_1	Reactome Gene Sets	6	R-MMU-72766	Translation		-9.3	26	14	20504	220	29	8	28	8.3	13669|16341|20085|27979|55944|56347|208643|223691	Eif3a|Eif3e|Rps19|Eif3b|Eif3d|Eif3c|Eif4g1|Eif3l	-7.9
D16_SUB1_MCODE_1	GO Biological Processes	19	GO:0042274	ribosomal small subunit biogenesis	19_GO:0009987 cellular process	-9.2	59	19	20504	72	29	6	21	7.5	20085|53414|74778|75416|217995|223499	Rps19|Bysl|Rrp7a|Nop14|Heatr1|Dcaf13	-7.8
D16_SUB1_MCODE_1	Reactome Gene Sets	6	R-MMU-72203	Processing of Capped Intron-Containing Pre-mRNA		-9.1	25	14	20504	229	29	8	28	8.3	11991|15387|53379|59013|66055|68879|74326|74351	Hnrnpd|Hnrnpk|Hnrnpa2b1|Hnrnph1|Sf3b6|Prpf6|Hnrnpr|Ddx23	-7.8
D16_SUB1_MCODE_1	GO Biological Processes	19	GO:0006412	translation	19_GO:0008152 metabolic process	-9	11	10	20504	677	29	11	38	9	11991|13669|16341|20085|27979|55944|56347|74326|208643|223691|229317	Hnrnpd|Eif3a|Eif3e|Rps19|Eif3b|Eif3d|Eif3c|Hnrnpr|Eif4g1|Eif3l|Eif2a	-7.7
D16_SUB1_MCODE_1	GO Biological Processes	19	GO:0043043	peptide biosynthetic process	19_GO:0008152 metabolic process	-8.9	11	10	20504	701	29	11	38	9	11991|13669|16341|20085|27979|55944|56347|74326|208643|223691|229317	Hnrnpd|Eif3a|Eif3e|Rps19|Eif3b|Eif3d|Eif3c|Hnrnpr|Eif4g1|Eif3l|Eif2a	-7.5
D16_SUB1_MCODE_1	GO Biological Processes	19	GO:0075522	IRES-dependent viral translational initiation	19_GO:0016032 viral process	-8.8	240	31	20504	12	29	4	14	6.4	13669|19205|27979|55944	Eif3a|Ptbp1|Eif3b|Eif3d	-7.5
D16_SUB1_MCODE_1	GO Biological Processes	19	GO:0030490	maturation of SSU-rRNA	19_GO:0008152 metabolic process	-8.1	72	19	20504	49	29	5	17	7	20085|53414|75416|217995|223499	Rps19|Bysl|Nop14|Heatr1|Dcaf13	-6.9
D16_SUB1_MCODE_1	WikiPathways	27	WP310	mRNA processing		-8.1	14	11	20504	453	29	9	31	8.6	11991|15387|19205|27979|53379|59013|66055|68879|74326	Hnrnpd|Hnrnpk|Ptbp1|Eif3b|Hnrnpa2b1|Hnrnph1|Sf3b6|Prpf6|Hnrnpr	-6.8
D16_SUB1_MCODE_1	GO Biological Processes	19	GO:0016071	mRNA metabolic process	19_GO:0008152 metabolic process	-7.8	10	9.4	20504	675	29	10	34	8.8	11991|15387|16341|19205|53379|59013|66055|68879|74326|74351	Hnrnpd|Hnrnpk|Eif3e|Ptbp1|Hnrnpa2b1|Hnrnph1|Sf3b6|Prpf6|Hnrnpr|Ddx23	-6.6
D16_SUB1_MCODE_1	GO Biological Processes	19	GO:0001825	blastocyst formation	19_GO:0032502 developmental process	-7.7	60	17	20504	59	29	5	17	7	53414|66055|66229|74778|107071	Bysl|Sf3b6|Rpl7l1|Rrp7a|Wdr74	-6.5
D16_SUB1_MCODE_1	GO Biological Processes	19	GO:0019080	viral gene expression	19_GO:0016032 viral process	-7.4	51	16	20504	69	29	5	17	7	13669|19205|27979|55944|223691	Eif3a|Ptbp1|Eif3b|Eif3d|Eif3l	-6.2
D16_SUB1_MCODE_1	GO Biological Processes	19	GO:0010608	posttranscriptional regulation of gene expression	19_GO:0008152 metabolic process	-7.2	11	9.1	20504	583	29	9	31	8.6	11991|16341|27979|53379|55944|74326|208643|229317|234374	Hnrnpd|Eif3e|Eif3b|Hnrnpa2b1|Eif3d|Hnrnpr|Eif4g1|Eif2a|Ddx49	-6
D16_SUB1_MCODE_1	GO Biological Processes	19	GO:1902416	positive regulation of mRNA binding	19_GO:0065007 biological regulation	-7.1	300	30	20504	7	29	3	10	5.7	16341|55944|208643	Eif3e|Eif3d|Eif4g1	-5.9
D16_SUB1_MCODE_1	KEGG Pathway	24	ko03013	RNA transport		-7	25	12	20504	167	29	6	21	7.5	13669|16341|27979|55944|56347|208643	Eif3a|Eif3e|Eif3b|Eif3d|Eif3c|Eif4g1	-5.8
D16_SUB1_MCODE_1	KEGG Pathway	24	mmu03013	RNA transport		-6.9	25	12	20504	168	29	6	21	7.5	13669|16341|27979|55944|56347|208643	Eif3a|Eif3e|Eif3b|Eif3d|Eif3c|Eif4g1	-5.8
D16_SUB1_MCODE_1	GO Biological Processes	19	GO:1905216	positive regulation of RNA binding	19_GO:0065007 biological regulation	-6.8	270	28	20504	8	29	3	10	5.7	16341|55944|208643	Eif3e|Eif3d|Eif4g1	-5.7
D16_SUB1_MCODE_1	GO Biological Processes	19	GO:0000462	maturation of SSU-rRNA from tricistronic rRNA transcript (SSU-rRNA, 5.8S rRNA, LSU-rRNA)	19_GO:0008152 metabolic process	-6.8	81	18	20504	35	29	4	14	6.4	20085|53414|217995|223499	Rps19|Bysl|Heatr1|Dcaf13	-5.7
D16_SUB1_MCODE_1	GO Molecular Functions	21	GO:0031369	translation initiation factor binding		-6.6	74	17	20504	38	29	4	14	6.4	20085|27979|56347|208643	Rps19|Eif3b|Eif3c|Eif4g1	-5.5
D16_SUB1_MCODE_1	GO Biological Processes	19	GO:1902415	regulation of mRNA binding	19_GO:0065007 biological regulation	-6.5	210	25	20504	10	29	3	10	5.7	16341|55944|208643	Eif3e|Eif3d|Eif4g1	-5.4
D16_SUB1_MCODE_1	GO Biological Processes	19	GO:1905214	regulation of RNA binding	19_GO:0065007 biological regulation	-6.1	160	22	20504	13	29	3	10	5.7	16341|55944|208643	Eif3e|Eif3d|Eif4g1	-5.1
D16_SUB1_MCODE_1	GO Biological Processes	19	GO:0006417	regulation of translation	19_GO:0008152 metabolic process	-6	13	8.8	20504	391	29	7	24	7.9	11991|16341|27979|55944|74326|208643|229317	Hnrnpd|Eif3e|Eif3b|Eif3d|Hnrnpr|Eif4g1|Eif2a	-5
D16_SUB1_MCODE_1	GO Biological Processes	19	GO:0008380	RNA splicing	19_GO:0008152 metabolic process	-6	12	8.7	20504	399	29	7	24	7.9	15387|19205|53379|59013|66055|68879|74351	Hnrnpk|Ptbp1|Hnrnpa2b1|Hnrnph1|Sf3b6|Prpf6|Ddx23	-4.9
D16_SUB1_MCODE_1	GO Biological Processes	19	GO:0000377	RNA splicing, via transesterification reactions with bulged adenosine as nucleophile	19_GO:0008152 metabolic process	-5.6	15	9	20504	280	29	6	21	7.5	15387|19205|53379|66055|68879|74351	Hnrnpk|Ptbp1|Hnrnpa2b1|Sf3b6|Prpf6|Ddx23	-4.7
D16_SUB1_MCODE_1	GO Biological Processes	19	GO:0000398	mRNA splicing, via spliceosome	19_GO:0008152 metabolic process	-5.6	15	9	20504	280	29	6	21	7.5	15387|19205|53379|66055|68879|74351	Hnrnpk|Ptbp1|Hnrnpa2b1|Sf3b6|Prpf6|Ddx23	-4.7
D16_SUB1_MCODE_1	GO Biological Processes	19	GO:0000375	RNA splicing, via transesterification reactions	19_GO:0008152 metabolic process	-5.6	15	9	20504	280	29	6	21	7.5	15387|19205|53379|66055|68879|74351	Hnrnpk|Ptbp1|Hnrnpa2b1|Sf3b6|Prpf6|Ddx23	-4.7
D16_SUB1_MCODE_1	GO Biological Processes	19	GO:0034248	regulation of cellular amide metabolic process	19_GO:0008152 metabolic process	-5.6	11	8.1	20504	449	29	7	24	7.9	11991|16341|27979|55944|74326|208643|229317	Hnrnpd|Eif3e|Eif3b|Eif3d|Hnrnpr|Eif4g1|Eif2a	-4.6
D16_SUB1_MCODE_1	GO Biological Processes	19	GO:0001824	blastocyst development	19_GO:0032502 developmental process	-5.6	23	10	20504	157	29	5	17	7	53414|66055|66229|74778|107071	Bysl|Sf3b6|Rpl7l1|Rrp7a|Wdr74	-4.6
D16_SUB1_MCODE_1	GO Biological Processes	19	GO:0006397	mRNA processing	19_GO:0008152 metabolic process	-5.5	11	7.9	20504	470	29	7	24	7.9	15387|19205|53379|59013|66055|68879|74351	Hnrnpk|Ptbp1|Hnrnpa2b1|Hnrnph1|Sf3b6|Prpf6|Ddx23	-4.5
D16_SUB1_MCODE_1	GO Biological Processes	19	GO:0022618	ribonucleoprotein complex assembly	19_GO:0009987 cellular process	-5.4	21	9.7	20504	171	29	5	17	7	13669|20085|55944|68879|74778	Eif3a|Rps19|Eif3d|Prpf6|Rrp7a	-4.5
D16_SUB1_MCODE_1	GO Biological Processes	19	GO:0071826	ribonucleoprotein complex subunit organization	19_GO:0009987 cellular process	-5.3	20	9.5	20504	178	29	5	17	7	13669|20085|55944|68879|74778	Eif3a|Rps19|Eif3d|Prpf6|Rrp7a	-4.4
D16_SUB1_MCODE_1	GO Biological Processes	19	GO:0048025	negative regulation of mRNA splicing, via spliceosome	19_GO:0048519 negative regulation of biological process	-5.3	88	16	20504	24	29	3	10	5.7	15387|19205|53379	Hnrnpk|Ptbp1|Hnrnpa2b1	-4.3
D16_SUB1_MCODE_1	GO Biological Processes	19	GO:1903312	negative regulation of mRNA metabolic process	19_GO:0048519 negative regulation of biological process	-5.1	30	11	20504	93	29	4	14	6.4	11991|15387|19205|53379	Hnrnpd|Hnrnpk|Ptbp1|Hnrnpa2b1	-4.1
D16_SUB1_MCODE_1	GO Biological Processes	19	GO:0033119	negative regulation of RNA splicing	19_GO:0048519 negative regulation of biological process	-5	73	15	20504	29	29	3	10	5.7	15387|19205|53379	Hnrnpk|Ptbp1|Hnrnpa2b1	-4.1
D16_SUB1_MCODE_1	GO Biological Processes	19	GO:0050686	negative regulation of mRNA processing	19_GO:0048519 negative regulation of biological process	-4.9	66	14	20504	32	29	3	10	5.7	15387|19205|53379	Hnrnpk|Ptbp1|Hnrnpa2b1	-4
D16_SUB1_MCODE_1	GO Molecular Functions	21	GO:0003730	mRNA 3'-UTR binding		-4.8	27	10	20504	106	29	4	14	6.4	11991|15387|53379|74326	Hnrnpd|Hnrnpk|Hnrnpa2b1|Hnrnpr	-3.9
D16_SUB1_MCODE_1	GO Molecular Functions	21	GO:0036002	pre-mRNA binding		-4.7	57	13	20504	37	29	3	10	5.7	15387|19205|53379	Hnrnpk|Ptbp1|Hnrnpa2b1	-3.8
D16_SUB1_MCODE_1	KEGG Pathway	24	ko03008	Ribosome biogenesis in eukaryotes		-4.7	24	9.5	20504	116	29	4	14	6.4	72515|72554|74778|217995	Wdr43|Utp14a|Rrp7a|Heatr1	-3.8
D16_SUB1_MCODE_1	KEGG Pathway	24	mmu03008	Ribosome biogenesis in eukaryotes		-4.7	24	9.5	20504	117	29	4	14	6.4	72515|72554|74778|217995	Wdr43|Utp14a|Rrp7a|Heatr1	-3.8
D16_SUB1_MCODE_1	GO Biological Processes	19	GO:0045727	positive regulation of translation	19_GO:0048518 positive regulation of biological process	-4.5	22	8.9	20504	131	29	4	14	6.4	11991|16341|55944|208643	Hnrnpd|Eif3e|Eif3d|Eif4g1	-3.6
D16_SUB1_MCODE_1	KEGG Pathway	24	mmu03040	Spliceosome		-4.5	21	8.8	20504	133	29	4	14	6.4	15387|66055|68879|74351	Hnrnpk|Sf3b6|Prpf6|Ddx23	-3.6
D16_SUB1_MCODE_1	KEGG Pathway	24	ko03040	Spliceosome		-4.5	21	8.8	20504	133	29	4	14	6.4	15387|66055|68879|74351	Hnrnpk|Sf3b6|Prpf6|Ddx23	-3.6
D16_SUB1_MCODE_1	Reactome Gene Sets	6	R-MMU-72165	mRNA Splicing - Minor Pathway		-4.4	44	11	20504	48	29	3	10	5.7	66055|68879|74351	Sf3b6|Prpf6|Ddx23	-3.5
D16_SUB1_MCODE_1	GO Biological Processes	19	GO:1903311	regulation of mRNA metabolic process	19_GO:0008152 metabolic process	-4.3	12	7.2	20504	293	29	5	17	7	11991|15387|19205|53379|74326	Hnrnpd|Hnrnpk|Ptbp1|Hnrnpa2b1|Hnrnpr	-3.5
D16_SUB1_MCODE_1	GO Biological Processes	19	GO:0043484	regulation of RNA splicing	19_GO:0008152 metabolic process	-4.2	18	8	20504	158	29	4	14	6.4	15387|19205|53379|59013	Hnrnpk|Ptbp1|Hnrnpa2b1|Hnrnph1	-3.3
D16_SUB1_MCODE_1	GO Biological Processes	19	GO:0034250	positive regulation of cellular amide metabolic process	19_GO:0048518 positive regulation of biological process	-4.1	18	8	20504	159	29	4	14	6.4	11991|16341|55944|208643	Hnrnpd|Eif3e|Eif3d|Eif4g1	-3.3
D16_SUB1_MCODE_1	GO Molecular Functions	21	GO:0043021	ribonucleoprotein complex binding		-4.1	17	7.8	20504	168	29	4	14	6.4	15387|56347|68879|229317	Hnrnpk|Eif3c|Prpf6|Eif2a	-3.3
D16_SUB1_MCODE_1	GO Biological Processes	19	GO:0042255	ribosome assembly	19_GO:0009987 cellular process	-4	34	9.8	20504	63	29	3	10	5.7	20085|74778|229317	Rps19|Rrp7a|Eif2a	-3.2
D16_SUB1_MCODE_1	GO Biological Processes	19	GO:0016032	viral process	19_GO:0016032 viral process	-3.9	10	6.5	20504	346	29	5	17	7	13669|19205|27979|55944|223691	Eif3a|Ptbp1|Eif3b|Eif3d|Eif3l	-3.2
D16_SUB1_MCODE_1	GO Molecular Functions	21	GO:0003724	RNA helicase activity		-3.8	29	9	20504	73	29	3	10	5.7	71990|74351|234374	Ddx54|Ddx23|Ddx49	-3.1
D16_SUB1_MCODE_1	GO Molecular Functions	21	GO:0008186	ATP-dependent activity, acting on RNA		-3.8	28	8.9	20504	75	29	3	10	5.7	71990|74351|234374	Ddx54|Ddx23|Ddx49	-3
D16_SUB1_MCODE_1	GO Biological Processes	19	GO:0048024	regulation of mRNA splicing, via spliceosome	19_GO:0008152 metabolic process	-3.3	19	7.2	20504	111	29	3	10	5.7	15387|19205|53379	Hnrnpk|Ptbp1|Hnrnpa2b1	-2.6
D16_SUB1_MCODE_1	GO Biological Processes	19	GO:0006401	RNA catabolic process	19_GO:0008152 metabolic process	-3.3	10	5.9	20504	273	29	4	14	6.4	11991|16341|74326|234374	Hnrnpd|Eif3e|Hnrnpr|Ddx49	-2.6
D16_SUB1_MCODE_1	GO Molecular Functions	21	GO:0003697	single-stranded DNA binding		-3.2	17	6.8	20504	123	29	3	10	5.7	15387|19205|53379	Hnrnpk|Ptbp1|Hnrnpa2b1	-2.5
D16_SUB1_MCODE_1	GO Biological Processes	19	GO:0001701	in utero embryonic development	19_GO:0032502 developmental process	-3	6.4	4.8	20504	556	29	5	17	7	53414|66055|66229|74778|107071	Bysl|Sf3b6|Rpl7l1|Rrp7a|Wdr74	-2.3
D16_SUB1_MCODE_1	GO Biological Processes	19	GO:0050684	regulation of mRNA processing	19_GO:0008152 metabolic process	-2.9	14	6.1	20504	149	29	3	10	5.7	15387|19205|53379	Hnrnpk|Ptbp1|Hnrnpa2b1	-2.3
D16_SUB1_MCODE_1	GO Molecular Functions	21	GO:0004386	helicase activity		-2.9	14	6.1	20504	151	29	3	10	5.7	71990|74351|234374	Ddx54|Ddx23|Ddx49	-2.3
D16_SUB1_MCODE_1	GO Molecular Functions	21	GO:0016922	nuclear receptor binding		-2.9	14	6	20504	155	29	3	10	5.7	68879|71990|223499	Prpf6|Ddx54|Dcaf13	-2.2
D16_SUB1_MCODE_1	GO Biological Processes	19	GO:0043487	regulation of RNA stability	19_GO:0008152 metabolic process	-2.8	13	5.7	20504	166	29	3	10	5.7	11991|74326|234374	Hnrnpd|Hnrnpr|Ddx49	-2.2
D16_SUB1_MCODE_1	GO Biological Processes	19	GO:0034655	nucleobase-containing compound catabolic process	19_GO:0008152 metabolic process	-2.7	7.3	4.7	20504	387	29	4	14	6.4	11991|16341|74326|234374	Hnrnpd|Eif3e|Hnrnpr|Ddx49	-2.1
D16_SUB1_MCODE_1	GO Biological Processes	19	GO:0051098	regulation of binding	19_GO:0065007 biological regulation	-2.6	7.1	4.6	20504	397	29	4	14	6.4	15387|16341|55944|208643	Hnrnpk|Eif3e|Eif3d|Eif4g1	-2.1
D16_SUB1_MCODE_1	GO Biological Processes	19	GO:0017148	negative regulation of translation	19_GO:0048519 negative regulation of biological process	-2.6	11	5.4	20504	186	29	3	10	5.7	11991|74326|208643	Hnrnpd|Hnrnpr|Eif4g1	-2
D16_SUB1_MCODE_1	GO Biological Processes	19	GO:0051099	positive regulation of binding	19_GO:0065007 biological regulation	-2.6	11	5.2	20504	193	29	3	10	5.7	16341|55944|208643	Eif3e|Eif3d|Eif4g1	-2
D16_SUB1_MCODE_1	GO Biological Processes	19	GO:0044270	cellular nitrogen compound catabolic process	19_GO:0008152 metabolic process	-2.6	6.7	4.5	20504	421	29	4	14	6.4	11991|16341|74326|234374	Hnrnpd|Eif3e|Hnrnpr|Ddx49	-2
D16_SUB1_MCODE_1	GO Biological Processes	19	GO:0046700	heterocycle catabolic process	19_GO:0008152 metabolic process	-2.6	6.7	4.5	20504	422	29	4	14	6.4	11991|16341|74326|234374	Hnrnpd|Eif3e|Hnrnpr|Ddx49	-2
D16_SUB1_MCODE_1	GO Biological Processes	19	GO:0030307	positive regulation of cell growth	19_GO:0040007 growth	-2.5	10	5	20504	206	29	3	10	5.7	15387|208643|234374	Hnrnpk|Eif4g1|Ddx49	-1.9
D16_SUB1_MCODE_1	GO Biological Processes	19	GO:0034249	negative regulation of cellular amide metabolic process	19_GO:0048519 negative regulation of biological process	-2.5	10	5	20504	209	29	3	10	5.7	11991|74326|208643	Hnrnpd|Hnrnpr|Eif4g1	-1.9
D16_SUB1_MCODE_1	GO Biological Processes	19	GO:0019439	aromatic compound catabolic process	19_GO:0008152 metabolic process	-2.5	6.4	4.3	20504	439	29	4	14	6.4	11991|16341|74326|234374	Hnrnpd|Eif3e|Hnrnpr|Ddx49	-1.9
D16_SUB1_MCODE_1	GO Biological Processes	19	GO:1901361	organic cyclic compound catabolic process	19_GO:0008152 metabolic process	-2.4	6	4.1	20504	470	29	4	14	6.4	11991|16341|74326|234374	Hnrnpd|Eif3e|Hnrnpr|Ddx49	-1.8
D16_SUB1_MCODE_1	GO Biological Processes	19	GO:0006402	mRNA catabolic process	19_GO:0048519 negative regulation of biological process	-2.4	9.1	4.7	20504	232	29	3	10	5.7	11991|16341|74326	Hnrnpd|Eif3e|Hnrnpr	-1.8
D16_SUB1_MCODE_1	GO Molecular Functions	21	GO:0140640	catalytic activity, acting on a nucleic acid		-2.1	4.9	3.6	20504	573	29	4	14	6.4	19205|71990|74351|234374	Ptbp1|Ddx54|Ddx23|Ddx49	-1.6
D16_SUB1_MCODE_2	GO Molecular Functions	21	GO:0031492	nucleosomal DNA binding		-14	280	41	20504	19	23	6	26	9.2	14958|15364|26914|50708|50709|56702	H1f0|Hmga2|Macroh2a1|H1f2|H1f4|H1f5	-12
D16_SUB1_MCODE_2	GO Molecular Functions	21	GO:0031491	nucleosome binding		-13	120	29	20504	50	23	7	30	9.6	14958|15364|18140|26914|50708|50709|56702	H1f0|Hmga2|Uhrf1|Macroh2a1|H1f2|H1f4|H1f5	-11
D16_SUB1_MCODE_2	GO Molecular Functions	21	GO:0003682	chromatin binding		-9.1	14	11	20504	649	23	10	43	10	13433|14958|15364|16468|18140|18392|26914|50708|50709|56702	Dnmt1|H1f0|Hmga2|Jarid2|Uhrf1|Orc1|Macroh2a1|H1f2|H1f4|H1f5	-7.8
D16_SUB1_MCODE_2	GO Molecular Functions	21	GO:0031490	chromatin DNA binding		-9	55	18	20504	97	23	6	26	9.2	14958|15364|26914|50708|50709|56702	H1f0|Hmga2|Macroh2a1|H1f2|H1f4|H1f5	-7.7
D16_SUB1_MCODE_2	GO Biological Processes	19	GO:0006325	chromatin organization	19_GO:0009987 cellular process	-8.9	17	12	20504	477	23	9	39	10	13433|14958|15364|16468|18140|26914|50708|50709|56702	Dnmt1|H1f0|Hmga2|Jarid2|Uhrf1|Macroh2a1|H1f2|H1f4|H1f5	-7.6
D16_SUB1_MCODE_2	GO Biological Processes	19	GO:0030261	chromosome condensation	19_GO:0009987 cellular process	-8.9	99	22	20504	45	23	5	22	8.6	14958|15364|50708|50709|56702	H1f0|Hmga2|H1f2|H1f4|H1f5	-7.6
D16_SUB1_MCODE_2	GO Biological Processes	19	GO:0016584	nucleosome positioning	19_GO:0009987 cellular process	-8.8	240	31	20504	15	23	4	17	7.9	14958|50708|50709|56702	H1f0|H1f2|H1f4|H1f5	-7.5
D16_SUB1_MCODE_2	Reactome Gene Sets	6	R-MMU-2559584	Formation of Senescence-Associated Heterochromatin Foci (SAHF)		-8.7	220	30	20504	16	23	4	17	7.9	14958|15364|50708|56702	H1f0|Hmga2|H1f2|H1f5	-7.4
D16_SUB1_MCODE_2	GO Biological Processes	19	GO:0034968	histone lysine methylation	19_GO:0008152 metabolic process	-8.4	43	16	20504	124	23	6	26	9.2	13433|16468|26914|50708|50709|56702	Dnmt1|Jarid2|Macroh2a1|H1f2|H1f4|H1f5	-7.1
D16_SUB1_MCODE_2	Reactome Gene Sets	6	R-MMU-8856688	Golgi-to-ER retrograde transport		-8.4	43	16	20504	124	23	6	26	9.2	12847|26934|50797|59042|71819|235661	Copa|Racgap1|Copb2|Cope|Kif23|Dync1li1	-7.1
D16_SUB1_MCODE_2	GO Biological Processes	19	GO:0018022	peptidyl-lysine methylation	19_GO:0008152 metabolic process	-8.1	38	15	20504	141	23	6	26	9.2	13433|16468|26914|50708|50709|56702	Dnmt1|Jarid2|Macroh2a1|H1f2|H1f4|H1f5	-6.8
D16_SUB1_MCODE_2	GO Biological Processes	19	GO:0016571	histone methylation	19_GO:0008152 metabolic process	-7.8	35	14	20504	154	23	6	26	9.2	13433|16468|26914|50708|50709|56702	Dnmt1|Jarid2|Macroh2a1|H1f2|H1f4|H1f5	-6.6
D16_SUB1_MCODE_2	GO Biological Processes	19	GO:0006323	DNA packaging	19_GO:0009987 cellular process	-7.8	35	14	20504	155	23	6	26	9.2	14958|15364|26914|50708|50709|56702	H1f0|Hmga2|Macroh2a1|H1f2|H1f4|H1f5	-6.6
D16_SUB1_MCODE_2	GO Biological Processes	19	GO:0016570	histone modification	19_GO:0008152 metabolic process	-7.6	15	11	20504	462	23	8	35	9.9	13433|15364|16468|18140|26914|50708|50709|56702	Dnmt1|Hmga2|Jarid2|Uhrf1|Macroh2a1|H1f2|H1f4|H1f5	-6.4
D16_SUB1_MCODE_2	Reactome Gene Sets	6	R-MMU-2559586	DNA Damage/Telomere Stress Induced Senescence		-7.6	56	17	20504	79	23	5	22	8.6	14958|15364|50708|56702|326619	H1f0|Hmga2|H1f2|H1f5|H4c1	-6.4
D16_SUB1_MCODE_2	GO Biological Processes	19	GO:0006334	nucleosome assembly	19_GO:0009987 cellular process	-7.5	54	16	20504	82	23	5	22	8.6	14958|26914|50708|50709|56702	H1f0|Macroh2a1|H1f2|H1f4|H1f5	-6.3
D16_SUB1_MCODE_2	Reactome Gene Sets	6	R-MMU-6811442	Intra-Golgi and retrograde Golgi-to-ER traffic		-7.5	30	13	20504	177	23	6	26	9.2	12847|26934|50797|59042|71819|235661	Copa|Racgap1|Copb2|Cope|Kif23|Dync1li1	-6.3
D16_SUB1_MCODE_2	CORUM	33	CORUM:3145	Coatomer complex		-7.4	380	34	20504	7	23	3	13	7	12847|50797|59042	Copa|Copb2|Cope	-6.2
D16_SUB1_MCODE_2	Reactome Gene Sets	6	R-MMU-6811434	COPI-dependent Golgi-to-ER retrograde traffic		-7.3	49	15	20504	91	23	5	22	8.6	12847|26934|50797|59042|71819	Copa|Racgap1|Copb2|Cope|Kif23	-6.1
D16_SUB1_MCODE_2	GO Biological Processes	19	GO:0006479	protein methylation	19_GO:0008152 metabolic process	-7.2	28	12	20504	194	23	6	26	9.2	13433|16468|26914|50708|50709|56702	Dnmt1|Jarid2|Macroh2a1|H1f2|H1f4|H1f5	-6.1
D16_SUB1_MCODE_2	GO Biological Processes	19	GO:0008213	protein alkylation	19_GO:0008152 metabolic process	-7.2	28	12	20504	194	23	6	26	9.2	13433|16468|26914|50708|50709|56702	Dnmt1|Jarid2|Macroh2a1|H1f2|H1f4|H1f5	-6.1
D16_SUB1_MCODE_2	CORUM	33	CORUM:3146	Coatomer-Arf1 complex		-7.2	330	32	20504	8	23	3	13	7	12847|50797|59042	Copa|Copb2|Cope	-6
D16_SUB1_MCODE_2	GO Biological Processes	19	GO:0071103	DNA conformation change	19_GO:0009987 cellular process	-7.1	26	12	20504	203	23	6	26	9.2	14958|15364|26914|50708|50709|56702	H1f0|Hmga2|Macroh2a1|H1f2|H1f4|H1f5	-6
D16_SUB1_MCODE_2	GO Biological Processes	19	GO:0006338	chromatin remodeling	19_GO:0009987 cellular process	-7.1	26	12	20504	208	23	6	26	9.2	14958|16468|26914|50708|50709|56702	H1f0|Jarid2|Macroh2a1|H1f2|H1f4|H1f5	-5.9
D16_SUB1_MCODE_2	GO Biological Processes	19	GO:0031497	chromatin assembly	19_GO:0009987 cellular process	-7	43	14	20504	104	23	5	22	8.6	14958|26914|50708|50709|56702	H1f0|Macroh2a1|H1f2|H1f4|H1f5	-5.9
D16_SUB1_MCODE_2	GO Biological Processes	19	GO:0072378	blood coagulation, fibrin clot formation	19_GO:0032501 multicellular organismal process	-7	300	30	20504	9	23	3	13	7	14161|14268|99571	Fga|Fn1|Fgg	-5.8
D16_SUB1_MCODE_2	GO Molecular Functions	21	GO:0005198	structural molecule activity		-6.9	12	9.2	20504	585	23	8	35	9.9	12847|14118|14161|14268|50797|59042|99571|226519	Copa|Fbn1|Fga|Fn1|Copb2|Cope|Fgg|Lamc1	-5.7
D16_SUB1_MCODE_2	Reactome Gene Sets	6	R-MMU-8957275	Post-translational protein phosphorylation		-6.8	39	14	20504	114	23	5	22	8.6	14118|14161|14268|99571|216197	Fbn1|Fga|Fn1|Fgg|Ckap4	-5.7
D16_SUB1_MCODE_2	Reactome Gene Sets	6	R-MMU-381426	Regulation of Insulin-like Growth Factor (IGF) transport and uptake by Insulin-like Growth Factor Binding Proteins (IGFBPs)		-6.7	37	13	20504	120	23	5	22	8.6	14118|14161|14268|99571|216197	Fbn1|Fga|Fn1|Fgg|Ckap4	-5.6
D16_SUB1_MCODE_2	GO Biological Processes	19	GO:0045910	negative regulation of DNA recombination	19_GO:0048519 negative regulation of biological process	-6.7	76	17	20504	47	23	4	17	7.9	14958|50708|50709|56702	H1f0|H1f2|H1f4|H1f5	-5.6
D16_SUB1_MCODE_2	GO Biological Processes	19	GO:0034728	nucleosome organization	19_GO:0009987 cellular process	-6.6	36	13	20504	125	23	5	22	8.6	14958|26914|50708|50709|56702	H1f0|Macroh2a1|H1f2|H1f4|H1f5	-5.5
D16_SUB1_MCODE_2	GO Biological Processes	19	GO:0006333	chromatin assembly or disassembly	19_GO:0009987 cellular process	-6.6	35	13	20504	127	23	5	22	8.6	14958|26914|50708|50709|56702	H1f0|Macroh2a1|H1f2|H1f4|H1f5	-5.5
D16_SUB1_MCODE_2	Reactome Gene Sets	6	R-MMU-140342	Apoptosis induced DNA fragmentation		-6.6	220	26	20504	12	23	3	13	7	14958|50708|56702	H1f0|H1f2|H1f5	-5.5
D16_SUB1_MCODE_2	GO Biological Processes	19	GO:0051053	negative regulation of DNA metabolic process	19_GO:0048519 negative regulation of biological process	-6.5	34	13	20504	132	23	5	22	8.6	14958|15364|50708|50709|56702	H1f0|Hmga2|H1f2|H1f4|H1f5	-5.4
D16_SUB1_MCODE_2	GO Biological Processes	19	GO:0072376	protein activation cascade	19_GO:0050896 response to stimulus	-6.5	210	25	20504	13	23	3	13	7	14161|14268|99571	Fga|Fn1|Fgg	-5.4
D16_SUB1_MCODE_2	GO Biological Processes	19	GO:0065004	protein-DNA complex assembly	19_GO:0009987 cellular process	-6.3	31	12	20504	145	23	5	22	8.6	14958|26914|50708|50709|56702	H1f0|Macroh2a1|H1f2|H1f4|H1f5	-5.2
D16_SUB1_MCODE_2	Reactome Gene Sets	6	R-MMU-354194	GRB2:SOS provides linkage to MAPK signaling for Integrins		-6.3	180	23	20504	15	23	3	13	7	14161|14268|99571	Fga|Fn1|Fgg	-5.2
D16_SUB1_MCODE_2	Reactome Gene Sets	6	R-MMU-372708	p130Cas linkage to MAPK signaling for integrins		-6.3	180	23	20504	15	23	3	13	7	14161|14268|99571	Fga|Fn1|Fgg	-5.2
D16_SUB1_MCODE_2	GO Molecular Functions	21	GO:0005201	extracellular matrix structural constituent		-6.2	30	12	20504	149	23	5	22	8.6	14118|14161|14268|99571|226519	Fbn1|Fga|Fn1|Fgg|Lamc1	-5.2
D16_SUB1_MCODE_2	GO Biological Processes	19	GO:0051568	histone H3-K4 methylation	19_GO:0008152 metabolic process	-6.2	58	15	20504	61	23	4	17	7.9	13433|26914|50708|50709	Dnmt1|Macroh2a1|H1f2|H1f4	-5.2
D16_SUB1_MCODE_2	Reactome Gene Sets	6	R-MMU-2559583	Cellular Senescence		-6.1	28	11	20504	162	23	5	22	8.6	14958|15364|50708|56702|326619	H1f0|Hmga2|H1f2|H1f5|H4c1	-5
D16_SUB1_MCODE_2	GO Biological Processes	19	GO:0043414	macromolecule methylation	19_GO:0008152 metabolic process	-6	17	9.6	20504	314	23	6	26	9.2	13433|16468|26914|50708|50709|56702	Dnmt1|Jarid2|Macroh2a1|H1f2|H1f4|H1f5	-5
D16_SUB1_MCODE_2	Reactome Gene Sets	6	R-MMU-216083	Integrin cell surface interactions		-6	51	14	20504	70	23	4	17	7.9	14118|14161|14268|99571	Fbn1|Fga|Fn1|Fgg	-4.9
D16_SUB1_MCODE_2	GO Biological Processes	19	GO:0071824	protein-DNA complex subunit organization	19_GO:0009987 cellular process	-5.7	23	10	20504	192	23	5	22	8.6	14958|26914|50708|50709|56702	H1f0|Macroh2a1|H1f2|H1f4|H1f5	-4.7
D16_SUB1_MCODE_2	GO Biological Processes	19	GO:0031060	regulation of histone methylation	19_GO:0008152 metabolic process	-5.6	42	13	20504	85	23	4	17	7.9	13433|16468|26914|56702	Dnmt1|Jarid2|Macroh2a1|H1f5	-4.6
D16_SUB1_MCODE_2	GO Biological Processes	19	GO:0032259	methylation	19_GO:0008152 metabolic process	-5.6	15	8.8	20504	363	23	6	26	9.2	13433|16468|26914|50708|50709|56702	Dnmt1|Jarid2|Macroh2a1|H1f2|H1f4|H1f5	-4.6
D16_SUB1_MCODE_2	GO Biological Processes	19	GO:0070734	histone H3-K27 methylation	19_GO:0008152 metabolic process	-5.6	110	18	20504	24	23	3	13	7	26914|50708|50709	Macroh2a1|H1f2|H1f4	-4.6
D16_SUB1_MCODE_2	GO Biological Processes	19	GO:0018205	peptidyl-lysine modification	19_GO:0008152 metabolic process	-5.5	14	8.7	20504	376	23	6	26	9.2	13433|16468|26914|50708|50709|56702	Dnmt1|Jarid2|Macroh2a1|H1f2|H1f4|H1f5	-4.6
D16_SUB1_MCODE_2	Reactome Gene Sets	6	R-MMU-6807878	COPI-mediated anterograde transport		-5.5	40	12	20504	90	23	4	17	7.9	12847|50797|59042|235661	Copa|Copb2|Cope|Dync1li1	-4.6
D16_SUB1_MCODE_2	GO Biological Processes	19	GO:0051052	regulation of DNA metabolic process	19_GO:0008152 metabolic process	-5.5	14	8.5	20504	388	23	6	26	9.2	13433|14958|15364|50708|50709|56702	Dnmt1|H1f0|Hmga2|H1f2|H1f4|H1f5	-4.5
D16_SUB1_MCODE_2	Reactome Gene Sets	6	R-MMU-354192	Integrin signaling		-5.5	99	17	20504	27	23	3	13	7	14161|14268|99571	Fga|Fn1|Fgg	-4.5
D16_SUB1_MCODE_2	GO Biological Processes	19	GO:0031061	negative regulation of histone methylation	19_GO:0048519 negative regulation of biological process	-5.5	99	17	20504	27	23	3	13	7	13433|16468|26914	Dnmt1|Jarid2|Macroh2a1	-4.5
D16_SUB1_MCODE_2	GO Biological Processes	19	GO:0006891	intra-Golgi vesicle-mediated transport	19_GO:0051179 localization	-5.5	99	17	20504	27	23	3	13	7	12847|50797|59042	Copa|Copb2|Cope	-4.5
D16_SUB1_MCODE_2	GO Biological Processes	19	GO:0051570	regulation of histone H3-K9 methylation	19_GO:0008152 metabolic process	-5.4	92	16	20504	29	23	3	13	7	13433|16468|56702	Dnmt1|Jarid2|H1f5	-4.4
D16_SUB1_MCODE_2	GO Biological Processes	19	GO:0035987	endodermal cell differentiation	19_GO:0032502 developmental process	-5.4	92	16	20504	29	23	3	13	7	14268|15364|26914	Fn1|Hmga2|Macroh2a1	-4.4
D16_SUB1_MCODE_2	GO Biological Processes	19	GO:0071168	protein localization to chromatin	19_GO:0051179 localization	-5.2	81	15	20504	33	23	3	13	7	16468|26914|56702	Jarid2|Macroh2a1|H1f5	-4.2
D16_SUB1_MCODE_2	GO Biological Processes	19	GO:0000018	regulation of DNA recombination	19_GO:0008152 metabolic process	-5.2	32	11	20504	112	23	4	17	7.9	14958|50708|50709|56702	H1f0|H1f2|H1f4|H1f5	-4.2
D16_SUB1_MCODE_2	GO Biological Processes	19	GO:0090068	positive regulation of cell cycle process	19_GO:0048518 positive regulation of biological process	-5.1	18	9	20504	249	23	5	22	8.6	18392|26914|26934|71819|235661	Orc1|Macroh2a1|Racgap1|Kif23|Dync1li1	-4.2
D16_SUB1_MCODE_2	Reactome Gene Sets	6	R-MMU-76009	Platelet Aggregation (Plug Formation)		-5.1	74	15	20504	36	23	3	13	7	14161|14268|99571	Fga|Fn1|Fgg	-4.1
D16_SUB1_MCODE_2	GO Biological Processes	19	GO:0040029	regulation of gene expression, epigenetic	19_GO:0008152 metabolic process	-5	29	10	20504	123	23	4	17	7.9	13433|15364|16468|26914	Dnmt1|Hmga2|Jarid2|Macroh2a1	-4.1
D16_SUB1_MCODE_2	GO Biological Processes	19	GO:0051567	histone H3-K9 methylation	19_GO:0008152 metabolic process	-5	69	14	20504	39	23	3	13	7	13433|16468|56702	Dnmt1|Jarid2|H1f5	-4
D16_SUB1_MCODE_2	Reactome Gene Sets	6	R-MMU-5674135	MAP2K and MAPK activation		-5	69	14	20504	39	23	3	13	7	14161|14268|99571	Fga|Fn1|Fgg	-4
D16_SUB1_MCODE_2	GO Biological Processes	19	GO:0001706	endoderm formation	19_GO:0032502 developmental process	-5	69	14	20504	39	23	3	13	7	14268|15364|26914	Fn1|Hmga2|Macroh2a1	-4
D16_SUB1_MCODE_2	Reactome Gene Sets	6	R-MMU-2262752	Cellular responses to stress		-4.8	11	7.4	20504	499	23	6	26	9.2	14958|15364|50708|56702|235661|326619	H1f0|Hmga2|H1f2|H1f5|Dync1li1|H4c1	-3.9
D16_SUB1_MCODE_2	Reactome Gene Sets	6	R-MMU-8953897	Cellular responses to stimuli		-4.8	11	7.3	20504	502	23	6	26	9.2	14958|15364|50708|56702|235661|326619	H1f0|Hmga2|H1f2|H1f5|Dync1li1|H4c1	-3.9
D16_SUB1_MCODE_2	GO Biological Processes	19	GO:0006890	retrograde vesicle-mediated transport, Golgi to endoplasmic reticulum	19_GO:0051179 localization	-4.8	59	13	20504	45	23	3	13	7	12847|50797|59042	Copa|Copb2|Cope	-3.9
D16_SUB1_MCODE_2	Reactome Gene Sets	6	R-MMU-199977	ER to Golgi Anterograde Transport		-4.8	25	9.7	20504	142	23	4	17	7.9	12847|50797|59042|235661	Copa|Copb2|Cope|Dync1li1	-3.9
D16_SUB1_MCODE_2	GO Biological Processes	19	GO:0031062	positive regulation of histone methylation	19_GO:0048518 positive regulation of biological process	-4.7	56	13	20504	48	23	3	13	7	13433|16468|56702	Dnmt1|Jarid2|H1f5	-3.8
D16_SUB1_MCODE_2	Reactome Gene Sets	6	R-MMU-75153	Apoptotic execution phase		-4.7	56	13	20504	48	23	3	13	7	14958|50708|56702	H1f0|H1f2|H1f5	-3.8
D16_SUB1_MCODE_2	Reactome Gene Sets	6	R-MMU-199991	Membrane Trafficking		-4.7	10	7.1	20504	533	23	6	26	9.2	12847|26934|50797|59042|71819|235661	Copa|Racgap1|Copb2|Cope|Kif23|Dync1li1	-3.8
D16_SUB1_MCODE_2	GO Biological Processes	19	GO:0061647	histone H3-K9 modification	19_GO:0008152 metabolic process	-4.6	53	12	20504	50	23	3	13	7	13433|16468|56702	Dnmt1|Jarid2|H1f5	-3.8
D16_SUB1_MCODE_2	GO Biological Processes	19	GO:0031057	negative regulation of histone modification	19_GO:0048519 negative regulation of biological process	-4.6	53	12	20504	50	23	3	13	7	13433|16468|26914	Dnmt1|Jarid2|Macroh2a1	-3.8
D16_SUB1_MCODE_2	GO Biological Processes	19	GO:0070527	platelet aggregation	19_GO:0022610 biological adhesion	-4.6	51	12	20504	52	23	3	13	7	14161|14268|99571	Fga|Fn1|Fgg	-3.7
D16_SUB1_MCODE_2	GO Biological Processes	19	GO:0045814	negative regulation of gene expression, epigenetic	19_GO:0048519 negative regulation of biological process	-4.6	51	12	20504	52	23	3	13	7	13433|15364|26914	Dnmt1|Hmga2|Macroh2a1	-3.7
D16_SUB1_MCODE_2	GO Biological Processes	19	GO:0000070	mitotic sister chromatid segregation	19_GO:0009987 cellular process	-4.6	22	9.1	20504	159	23	4	17	7.9	26914|26934|71819|235661	Macroh2a1|Racgap1|Kif23|Dync1li1	-3.7
D16_SUB1_MCODE_2	Reactome Gene Sets	6	R-MMU-5653656	Vesicle-mediated transport		-4.5	9.5	6.8	20504	566	23	6	26	9.2	12847|26934|50797|59042|71819|235661	Copa|Racgap1|Copb2|Cope|Kif23|Dync1li1	-3.7
D16_SUB1_MCODE_2	GO Biological Processes	19	GO:0045787	positive regulation of cell cycle	19_GO:0048518 positive regulation of biological process	-4.5	13	7.6	20504	336	23	5	22	8.6	18392|26914|26934|71819|235661	Orc1|Macroh2a1|Racgap1|Kif23|Dync1li1	-3.7
D16_SUB1_MCODE_2	Reactome Gene Sets	6	R-MMU-948021	Transport to the Golgi and subsequent modification		-4.4	21	8.8	20504	170	23	4	17	7.9	12847|50797|59042|235661	Copa|Copb2|Cope|Dync1li1	-3.6
D16_SUB1_MCODE_2	GO Biological Processes	19	GO:0031056	regulation of histone modification	19_GO:0008152 metabolic process	-4.4	20	8.7	20504	174	23	4	17	7.9	13433|16468|26914|56702	Dnmt1|Jarid2|Macroh2a1|H1f5	-3.6
D16_SUB1_MCODE_2	GO Biological Processes	19	GO:1902750	negative regulation of cell cycle G2/M phase transition	19_GO:0048519 negative regulation of biological process	-4.3	42	11	20504	63	23	3	13	7	15364|18392|26914	Hmga2|Orc1|Macroh2a1	-3.5
D16_SUB1_MCODE_2	GO Biological Processes	19	GO:0000819	sister chromatid segregation	19_GO:0009987 cellular process	-4.3	19	8.3	20504	188	23	4	17	7.9	26914|26934|71819|235661	Macroh2a1|Racgap1|Kif23|Dync1li1	-3.5
D16_SUB1_MCODE_2	GO Biological Processes	19	GO:0010564	regulation of cell cycle process	19_GO:0050789 regulation of biological process	-4.2	8.2	6.2	20504	656	23	6	26	9.2	15364|18392|26914|26934|71819|235661	Hmga2|Orc1|Macroh2a1|Racgap1|Kif23|Dync1li1	-3.4
D16_SUB1_MCODE_2	Reactome Gene Sets	6	R-MMU-212300	PRC2 methylates histones and DNA		-4.1	36	10	20504	74	23	3	13	7	13433|16468|326619	Dnmt1|Jarid2|H4c1	-3.3
D16_SUB1_MCODE_2	GO Biological Processes	19	GO:0007492	endoderm development	19_GO:0032502 developmental process	-4.1	36	10	20504	75	23	3	13	7	14268|15364|26914	Fn1|Hmga2|Macroh2a1	-3.3
D16_SUB1_MCODE_2	GO Biological Processes	19	GO:0034109	homotypic cell-cell adhesion	19_GO:0022610 biological adhesion	-4	34	9.8	20504	79	23	3	13	7	14161|14268|99571	Fga|Fn1|Fgg	-3.2
D16_SUB1_MCODE_2	GO Biological Processes	19	GO:1903047	mitotic cell cycle process	19_GO:0009987 cellular process	-4	7.6	6	20504	701	23	6	26	9.2	15364|18392|26914|26934|71819|235661	Hmga2|Orc1|Macroh2a1|Racgap1|Kif23|Dync1li1	-3.2
D16_SUB1_MCODE_2	GO Biological Processes	19	GO:0030168	platelet activation	19_GO:0032501 multicellular organismal process	-3.9	31	9.3	20504	87	23	3	13	7	14161|14268|99571	Fga|Fn1|Fgg	-3.1
D16_SUB1_MCODE_2	GO Biological Processes	19	GO:1901988	negative regulation of cell cycle phase transition	19_GO:0048519 negative regulation of biological process	-3.8	15	7.2	20504	243	23	4	17	7.9	15364|18392|26914|235661	Hmga2|Orc1|Macroh2a1|Dync1li1	-3.1
D16_SUB1_MCODE_2	GO Biological Processes	19	GO:0034502	protein localization to chromosome	19_GO:0051179 localization	-3.8	28	8.8	20504	96	23	3	13	7	16468|26914|56702	Jarid2|Macroh2a1|H1f5	-3
D16_SUB1_MCODE_2	Reactome Gene Sets	6	R-MMU-446203	Asparagine N-linked glycosylation		-3.8	14	7	20504	254	23	4	17	7.9	12847|50797|59042|235661	Copa|Copb2|Cope|Dync1li1	-3
D16_SUB1_MCODE_2	Reactome Gene Sets	6	R-MMU-1474244	Extracellular matrix organization		-3.8	14	7	20504	256	23	4	17	7.9	14118|14161|14268|99571	Fbn1|Fga|Fn1|Fgg	-3
D16_SUB1_MCODE_2	Reactome Gene Sets	6	R-MMU-109581	Apoptosis		-3.7	27	8.6	20504	100	23	3	13	7	14958|50708|56702	H1f0|H1f2|H1f5	-3
D16_SUB1_MCODE_2	GO Biological Processes	19	GO:0001704	formation of primary germ layer	19_GO:0032502 developmental process	-3.7	26	8.6	20504	102	23	3	13	7	14268|15364|26914	Fn1|Hmga2|Macroh2a1	-3
D16_SUB1_MCODE_2	Reactome Gene Sets	6	R-MMU-109582	Hemostasis		-3.7	8.8	6	20504	506	23	5	22	8.6	14161|14268|26934|71819|99571	Fga|Fn1|Racgap1|Kif23|Fgg	-2.9
D16_SUB1_MCODE_2	GO Biological Processes	19	GO:1902749	regulation of cell cycle G2/M phase transition	19_GO:0050789 regulation of biological process	-3.7	25	8.4	20504	105	23	3	13	7	15364|18392|26914	Hmga2|Orc1|Macroh2a1	-2.9
D16_SUB1_MCODE_2	Reactome Gene Sets	6	R-MMU-2132295	MHC class II antigen presentation		-3.7	25	8.4	20504	105	23	3	13	7	26934|71819|235661	Racgap1|Kif23|Dync1li1	-2.9
D16_SUB1_MCODE_2	GO Biological Processes	19	GO:0098813	nuclear chromosome segregation	19_GO:0009987 cellular process	-3.7	13	6.7	20504	273	23	4	17	7.9	26914|26934|71819|235661	Macroh2a1|Racgap1|Kif23|Dync1li1	-2.9
D16_SUB1_MCODE_2	Reactome Gene Sets	6	R-MMU-212165	Epigenetic regulation of gene expression		-3.6	25	8.3	20504	108	23	3	13	7	13433|16468|326619	Dnmt1|Jarid2|H4c1	-2.9
D16_SUB1_MCODE_2	GO Biological Processes	19	GO:0031058	positive regulation of histone modification	19_GO:0048518 positive regulation of biological process	-3.6	25	8.3	20504	108	23	3	13	7	13433|16468|56702	Dnmt1|Jarid2|H1f5	-2.9
D16_SUB1_MCODE_2	GO Biological Processes	19	GO:0140014	mitotic nuclear division	19_GO:0009987 cellular process	-3.6	13	6.6	20504	279	23	4	17	7.9	26914|26934|71819|235661	Macroh2a1|Racgap1|Kif23|Dync1li1	-2.9
D16_SUB1_MCODE_2	GO Biological Processes	19	GO:0010948	negative regulation of cell cycle process	19_GO:0048519 negative regulation of biological process	-3.6	13	6.6	20504	283	23	4	17	7.9	15364|18392|26914|235661	Hmga2|Orc1|Macroh2a1|Dync1li1	-2.9
D16_SUB1_MCODE_2	Reactome Gene Sets	6	R-MMU-114608	Platelet degranulation		-3.6	23	8	20504	115	23	3	13	7	14161|14268|99571	Fga|Fn1|Fgg	-2.8
D16_SUB1_MCODE_2	GO Biological Processes	19	GO:0006888	endoplasmic reticulum to Golgi vesicle-mediated transport	19_GO:0051179 localization	-3.5	23	7.9	20504	117	23	3	13	7	12847|50797|59042	Copa|Copb2|Cope	-2.8
D16_SUB1_MCODE_2	GO Molecular Functions	21	GO:0050839	cell adhesion molecule binding		-3.5	12	6.4	20504	295	23	4	17	7.9	14118|14161|14268|99571	Fbn1|Fga|Fn1|Fgg	-2.8
D16_SUB1_MCODE_2	Reactome Gene Sets	6	R-MMU-76005	Response to elevated platelet cytosolic Ca2+		-3.5	22	7.8	20504	120	23	3	13	7	14161|14268|99571	Fga|Fn1|Fgg	-2.8
D16_SUB1_MCODE_2	GO Biological Processes	19	GO:0006310	DNA recombination	19_GO:0008152 metabolic process	-3.5	12	6.4	20504	301	23	4	17	7.9	14958|50708|50709|56702	H1f0|H1f2|H1f4|H1f5	-2.8
D16_SUB1_MCODE_2	Reactome Gene Sets	6	R-MMU-5357801	Programmed Cell Death		-3.4	21	7.6	20504	127	23	3	13	7	14958|50708|56702	H1f0|H1f2|H1f5	-2.7
D16_SUB1_MCODE_2	GO Biological Processes	19	GO:0007093	mitotic cell cycle checkpoint signaling	19_GO:0048519 negative regulation of biological process	-3.3	20	7.3	20504	136	23	3	13	7	15364|18392|235661	Hmga2|Orc1|Dync1li1	-2.6
D16_SUB1_MCODE_2	GO Biological Processes	19	GO:0007059	chromosome segregation	19_GO:0009987 cellular process	-3.3	11	5.9	20504	338	23	4	17	7.9	26914|26934|71819|235661	Macroh2a1|Racgap1|Kif23|Dync1li1	-2.6
D16_SUB1_MCODE_2	GO Biological Processes	19	GO:0044839	cell cycle G2/M phase transition	19_GO:0009987 cellular process	-3.2	18	7	20504	146	23	3	13	7	15364|18392|26914	Hmga2|Orc1|Macroh2a1	-2.6
D16_SUB1_MCODE_2	GO Biological Processes	19	GO:0031589	cell-substrate adhesion	19_GO:0022610 biological adhesion	-3.2	9.7	5.7	20504	366	23	4	17	7.9	14161|14268|99571|226519	Fga|Fn1|Fgg|Lamc1	-2.5
D16_SUB1_MCODE_2	GO Biological Processes	19	GO:0050878	regulation of body fluid levels	19_GO:0065007 biological regulation	-3.2	9.7	5.6	20504	367	23	4	17	7.9	12847|14161|14268|99571	Copa|Fga|Fn1|Fgg	-2.5
D16_SUB1_MCODE_2	GO Biological Processes	19	GO:0045786	negative regulation of cell cycle	19_GO:0048519 negative regulation of biological process	-3.2	9.7	5.6	20504	368	23	4	17	7.9	15364|18392|26914|235661	Hmga2|Orc1|Macroh2a1|Dync1li1	-2.5
D16_SUB1_MCODE_2	GO Biological Processes	19	GO:1901987	regulation of cell cycle phase transition	19_GO:0050789 regulation of biological process	-3.1	9.4	5.5	20504	379	23	4	17	7.9	15364|18392|26914|235661	Hmga2|Orc1|Macroh2a1|Dync1li1	-2.4
D16_SUB1_MCODE_2	GO Biological Processes	19	GO:1901991	negative regulation of mitotic cell cycle phase transition	19_GO:0048519 negative regulation of biological process	-3.1	16	6.5	20504	169	23	3	13	7	15364|18392|235661	Hmga2|Orc1|Dync1li1	-2.4
D16_SUB1_MCODE_2	GO Biological Processes	19	GO:0007596	blood coagulation	19_GO:0032501 multicellular organismal process	-3	16	6.4	20504	171	23	3	13	7	14161|14268|99571	Fga|Fn1|Fgg	-2.4
D16_SUB1_MCODE_2	GO Biological Processes	19	GO:0050817	coagulation	19_GO:0032501 multicellular organismal process	-3	15	6.4	20504	174	23	3	13	7	14161|14268|99571	Fga|Fn1|Fgg	-2.4
D16_SUB1_MCODE_2	GO Biological Processes	19	GO:0007599	hemostasis	19_GO:0065007 biological regulation	-3	15	6.4	20504	174	23	3	13	7	14161|14268|99571	Fga|Fn1|Fgg	-2.4
D16_SUB1_MCODE_2	GO Biological Processes	19	GO:0000075	cell cycle checkpoint signaling	19_GO:0048519 negative regulation of biological process	-3	15	6.3	20504	176	23	3	13	7	15364|18392|235661	Hmga2|Orc1|Dync1li1	-2.4
D16_SUB1_MCODE_2	GO Biological Processes	19	GO:0007369	gastrulation	19_GO:0032502 developmental process	-3	15	6.3	20504	178	23	3	13	7	14268|15364|26914	Fn1|Hmga2|Macroh2a1	-2.3
D16_SUB1_MCODE_2	GO Biological Processes	19	GO:0033044	regulation of chromosome organization	19_GO:0050789 regulation of biological process	-3	14	6.2	20504	185	23	3	13	7	13433|26914|235661	Dnmt1|Macroh2a1|Dync1li1	-2.3
D16_SUB1_MCODE_2	GO Biological Processes	19	GO:0000280	nuclear division	19_GO:0009987 cellular process	-2.9	8	5	20504	443	23	4	17	7.9	26914|26934|71819|235661	Macroh2a1|Racgap1|Kif23|Dync1li1	-2.2
D16_SUB1_MCODE_2	GO Biological Processes	19	GO:0007160	cell-matrix adhesion	19_GO:0022610 biological adhesion	-2.7	12	5.5	20504	225	23	3	13	7	14161|14268|99571	Fga|Fn1|Fgg	-2.1
D16_SUB1_MCODE_2	GO Biological Processes	19	GO:0044770	cell cycle phase transition	19_GO:0009987 cellular process	-2.7	7.2	4.7	20504	493	23	4	17	7.9	15364|18392|26914|235661	Hmga2|Orc1|Macroh2a1|Dync1li1	-2.1
D16_SUB1_MCODE_2	GO Biological Processes	19	GO:0048285	organelle fission	19_GO:0009987 cellular process	-2.7	7.2	4.7	20504	496	23	4	17	7.9	26914|26934|71819|235661	Macroh2a1|Racgap1|Kif23|Dync1li1	-2.1
D16_SUB1_MCODE_2	Reactome Gene Sets	6	R-MMU-69278	Cell Cycle, Mitotic		-2.7	7.2	4.7	20504	496	23	4	17	7.9	18392|71819|235661|326619	Orc1|Kif23|Dync1li1|H4c1	-2.1
D16_SUB1_MCODE_2	GO Biological Processes	19	GO:0090276	regulation of peptide hormone secretion	19_GO:0051179 localization	-2.7	12	5.4	20504	230	23	3	13	7	14161|15364|99571	Fga|Hmga2|Fgg	-2.1
D16_SUB1_MCODE_2	GO Biological Processes	19	GO:0045930	negative regulation of mitotic cell cycle	19_GO:0048519 negative regulation of biological process	-2.7	12	5.4	20504	231	23	3	13	7	15364|18392|235661	Hmga2|Orc1|Dync1li1	-2.1
D16_SUB1_MCODE_2	GO Biological Processes	19	GO:0002791	regulation of peptide secretion	19_GO:0051179 localization	-2.7	11	5.4	20504	235	23	3	13	7	14161|15364|99571	Fga|Hmga2|Fgg	-2.1
D16_SUB1_MCODE_2	GO Biological Processes	19	GO:0090087	regulation of peptide transport	19_GO:0051179 localization	-2.6	11	5.3	20504	237	23	3	13	7	14161|15364|99571	Fga|Hmga2|Fgg	-2
D16_SUB1_MCODE_2	Reactome Gene Sets	6	R-MMU-76002	Platelet activation, signaling and aggregation		-2.6	11	5.3	20504	241	23	3	13	7	14161|14268|99571	Fga|Fn1|Fgg	-2
D16_SUB1_MCODE_2	GO Biological Processes	19	GO:0016458	gene silencing	19_GO:0048519 negative regulation of biological process	-2.6	11	5.3	20504	243	23	3	13	7	13433|14958|15364	Dnmt1|H1f0|Hmga2	-2
D16_SUB1_MCODE_2	GO Biological Processes	19	GO:0033002	muscle cell proliferation	19_GO:0009987 cellular process	-2.6	10	5.1	20504	255	23	3	13	7	13433|16468|18392	Dnmt1|Jarid2|Orc1	-2
D16_SUB1_MCODE_2	Reactome Gene Sets	6	R-MMU-5673001	RAF/MAP kinase cascade		-2.5	10	5.1	20504	259	23	3	13	7	14161|14268|99571	Fga|Fn1|Fgg	-2
D16_SUB1_MCODE_2	Reactome Gene Sets	6	R-MMU-5684996	MAPK1/MAPK3 signaling		-2.5	10	5	20504	265	23	3	13	7	14161|14268|99571	Fga|Fn1|Fgg	-1.9
D16_SUB1_MCODE_2	Reactome Gene Sets	6	R-MMU-69620	Cell Cycle Checkpoints		-2.5	9.9	4.9	20504	270	23	3	13	7	18392|235661|326619	Orc1|Dync1li1|H4c1	-1.9
D16_SUB1_MCODE_2	GO Biological Processes	19	GO:0048193	Golgi vesicle transport	19_GO:0051179 localization	-2.5	9.8	4.9	20504	274	23	3	13	7	12847|50797|59042	Copa|Copb2|Cope	-1.9
D16_SUB1_MCODE_2	Reactome Gene Sets	6	R-MMU-1640170	Cell Cycle		-2.4	6.2	4.2	20504	579	23	4	17	7.9	18392|71819|235661|326619	Orc1|Kif23|Dync1li1|H4c1	-1.9
D16_SUB1_MCODE_2	KEGG Pathway	24	ko05206	MicroRNAs in cancer		-2.4	9.6	4.8	20504	280	23	3	13	7	13433|15364|71819	Dnmt1|Hmga2|Kif23	-1.9
D16_SUB1_MCODE_2	KEGG Pathway	24	mmu05206	MicroRNAs in cancer		-2.4	9.5	4.8	20504	282	23	3	13	7	13433|15364|71819	Dnmt1|Hmga2|Kif23	-1.9
D16_SUB1_MCODE_2	GO Biological Processes	19	GO:0030072	peptide hormone secretion	19_GO:0051179 localization	-2.4	9.4	4.8	20504	285	23	3	13	7	14161|15364|99571	Fga|Hmga2|Fgg	-1.9
D16_SUB1_MCODE_2	Reactome Gene Sets	6	R-MMU-5683057	MAPK family signaling cascades		-2.4	9.3	4.7	20504	288	23	3	13	7	14161|14268|99571	Fga|Fn1|Fgg	-1.8
D16_SUB1_MCODE_2	GO Biological Processes	19	GO:0010038	response to metal ion	19_GO:0050896 response to stimulus	-2.4	9.2	4.7	20504	292	23	3	13	7	14161|14268|99571	Fga|Fn1|Fgg	-1.8
D16_SUB1_MCODE_2	WikiPathways	27	WP1763	PluriNetWork: mechanisms associated with pluripotency		-2.4	9.2	4.7	20504	292	23	3	13	7	13433|16468|18140	Dnmt1|Jarid2|Uhrf1	-1.8
D16_SUB1_MCODE_2	GO Biological Processes	19	GO:1901990	regulation of mitotic cell cycle phase transition	19_GO:0050789 regulation of biological process	-2.4	9.1	4.7	20504	293	23	3	13	7	15364|18392|235661	Hmga2|Orc1|Dync1li1	-1.8
D16_SUB1_MCODE_2	GO Biological Processes	19	GO:0002790	peptide secretion	19_GO:0051179 localization	-2.4	9.1	4.7	20504	293	23	3	13	7	14161|15364|99571	Fga|Hmga2|Fgg	-1.8
D16_SUB1_MCODE_2	GO Biological Processes	19	GO:0046883	regulation of hormone secretion	19_GO:0051179 localization	-2.3	8.9	4.6	20504	302	23	3	13	7	14161|15364|99571	Fga|Hmga2|Fgg	-1.8
D16_SUB1_MCODE_2	GO Biological Processes	19	GO:0051301	cell division	19_GO:0009987 cellular process	-2.3	5.7	4	20504	621	23	4	17	7.9	15364|26934|71819|235661	Hmga2|Racgap1|Kif23|Dync1li1	-1.8
D16_SUB1_MCODE_2	GO Biological Processes	19	GO:0015833	peptide transport	19_GO:0051179 localization	-2.3	8.5	4.5	20504	314	23	3	13	7	14161|15364|99571	Fga|Hmga2|Fgg	-1.8
D16_SUB1_MCODE_2	GO Biological Processes	19	GO:0045927	positive regulation of growth	19_GO:0040007 growth	-2.3	8.3	4.4	20504	321	23	3	13	7	14268|15364|56702	Fn1|Hmga2|H1f5	-1.7
D16_SUB1_MCODE_2	Reactome Gene Sets	6	R-MMU-194315	Signaling by Rho GTPases		-2.3	5.5	3.9	20504	652	23	4	17	7.9	26934|216197|235661|326619	Racgap1|Ckap4|Dync1li1|H4c1	-1.7
D16_SUB1_MCODE_2	GO Biological Processes	19	GO:0070372	regulation of ERK1 and ERK2 cascade	19_GO:0023052 signaling	-2.2	8	4.3	20504	333	23	3	13	7	14161|14268|99571	Fga|Fn1|Fgg	-1.7
D16_SUB1_MCODE_2	Reactome Gene Sets	6	R-MMU-9716542	Signaling by Rho GTPases, Miro GTPases and RHOBTB3		-2.2	5.3	3.8	20504	667	23	4	17	7.9	26934|216197|235661|326619	Racgap1|Ckap4|Dync1li1|H4c1	-1.7
D16_SUB1_MCODE_2	GO Biological Processes	19	GO:0042886	amide transport	19_GO:0051179 localization	-2.2	7.8	4.2	20504	345	23	3	13	7	14161|15364|99571	Fga|Hmga2|Fgg	-1.7
D16_SUB1_MCODE_2	GO Biological Processes	19	GO:0070371	ERK1 and ERK2 cascade	19_GO:0023052 signaling	-2.1	7.5	4.2	20504	356	23	3	13	7	14161|14268|99571	Fga|Fn1|Fgg	-1.6
D16_SUB1_MCODE_2	GO Biological Processes	19	GO:0042060	wound healing	19_GO:0050896 response to stimulus	-2.1	7.4	4.1	20504	363	23	3	13	7	14161|14268|99571	Fga|Fn1|Fgg	-1.6
D16_SUB1_MCODE_2	GO Biological Processes	19	GO:0046879	hormone secretion	19_GO:0051179 localization	-2.1	7.3	4.1	20504	367	23	3	13	7	14161|15364|99571	Fga|Hmga2|Fgg	-1.6
D16_SUB1_MCODE_2	GO Biological Processes	19	GO:0009914	hormone transport	19_GO:0051179 localization	-2.1	7.1	4	20504	375	23	3	13	7	14161|15364|99571	Fga|Hmga2|Fgg	-1.6
D16_SUB1_MCODE_2	GO Biological Processes	19	GO:0040008	regulation of growth	19_GO:0040007 growth	-2.1	4.9	3.6	20504	733	23	4	17	7.9	14268|15364|16468|56702	Fn1|Hmga2|Jarid2|H1f5	-1.6
D16_SUB1_MCODE_2	Reactome Gene Sets	6	R-MMU-68886	M Phase		-2.1	7	4	20504	380	23	3	13	7	71819|235661|326619	Kif23|Dync1li1|H4c1	-1.6
D16_SUB1_MCODE_2	GO Biological Processes	19	GO:0071692	protein localization to extracellular region	19_GO:0051179 localization	-2	6.7	3.8	20504	401	23	3	13	7	14118|14161|99571	Fbn1|Fga|Fgg	-1.5
D16_SUB1_MCODE_3	Reactome Gene Sets	6	R-MMU-1650814	Collagen biosynthesis and modifying enzymes		-54	330	83	20504	60	22	21	95	4.4	12406|12814|12819|12822|12825|12826|12827|12831|12832|12833|12834|12842|12843|18451|18452|18453|18822|19035|26432|26433|234407	Serpinh1|Col11a1|Col15a1|Col18a1|Col3a1|Col4a1|Col4a2|Col5a1|Col5a2|Col6a1|Col6a2|Col1a1|Col1a2|P4ha1|P4ha2|P4hb|Plod1|Ppib|Plod2|Plod3|Colgalt1	-51
D16_SUB1_MCODE_3	Reactome Gene Sets	6	R-MMU-1474290	Collagen formation		-50	240	71	20504	81	22	21	95	4.4	12406|12814|12819|12822|12825|12826|12827|12831|12832|12833|12834|12842|12843|18451|18452|18453|18822|19035|26432|26433|234407	Serpinh1|Col11a1|Col15a1|Col18a1|Col3a1|Col4a1|Col4a2|Col5a1|Col5a2|Col6a1|Col6a2|Col1a1|Col1a2|P4ha1|P4ha2|P4hb|Plod1|Ppib|Plod2|Plod3|Colgalt1	-48
D16_SUB1_MCODE_3	Reactome Gene Sets	6	R-MMU-1474244	Extracellular matrix organization		-39	76	40	20504	256	22	21	95	4.4	12406|12814|12819|12822|12825|12826|12827|12831|12832|12833|12834|12842|12843|18451|18452|18453|18822|19035|26432|26433|234407	Serpinh1|Col11a1|Col15a1|Col18a1|Col3a1|Col4a1|Col4a2|Col5a1|Col5a2|Col6a1|Col6a2|Col1a1|Col1a2|P4ha1|P4ha2|P4hb|Plod1|Ppib|Plod2|Plod3|Colgalt1	-37
D16_SUB1_MCODE_3	GO Molecular Functions	21	GO:0030020	extracellular matrix structural constituent conferring tensile strength		-31	320	64	20504	38	22	13	59	10	12814|12819|12822|12825|12826|12827|12831|12832|12833|12834|12835|12842|12843	Col11a1|Col15a1|Col18a1|Col3a1|Col4a1|Col4a2|Col5a1|Col5a2|Col6a1|Col6a2|Col6a3|Col1a1|Col1a2	-29
D16_SUB1_MCODE_3	Reactome Gene Sets	6	R-MMU-8948216	Collagen chain trimerization		-28	280	58	20504	40	22	12	55	11	12814|12819|12822|12825|12826|12827|12831|12832|12833|12834|12842|12843	Col11a1|Col15a1|Col18a1|Col3a1|Col4a1|Col4a2|Col5a1|Col5a2|Col6a1|Col6a2|Col1a1|Col1a2	-25
D16_SUB1_MCODE_3	Reactome Gene Sets	6	R-MMU-1442490	Collagen degradation		-27	250	54	20504	45	22	12	55	11	12814|12819|12822|12825|12826|12827|12831|12832|12833|12834|12842|12843	Col11a1|Col15a1|Col18a1|Col3a1|Col4a1|Col4a2|Col5a1|Col5a2|Col6a1|Col6a2|Col1a1|Col1a2	-25
D16_SUB1_MCODE_3	Reactome Gene Sets	6	R-MMU-2022090	Assembly of collagen fibrils and other multimeric structures		-26	200	49	20504	56	22	12	55	11	12814|12819|12822|12825|12826|12827|12831|12832|12833|12834|12842|12843	Col11a1|Col15a1|Col18a1|Col3a1|Col4a1|Col4a2|Col5a1|Col5a2|Col6a1|Col6a2|Col1a1|Col1a2	-23
D16_SUB1_MCODE_3	KEGG Pathway	24	ko04974	Protein digestion and absorption		-25	130	42	20504	90	22	13	59	10	12814|12819|12822|12825|12826|12827|12831|12832|12833|12834|12835|12842|12843	Col11a1|Col15a1|Col18a1|Col3a1|Col4a1|Col4a2|Col5a1|Col5a2|Col6a1|Col6a2|Col6a3|Col1a1|Col1a2	-23
D16_SUB1_MCODE_3	KEGG Pathway	24	mmu04974	Protein digestion and absorption		-25	130	41	20504	93	22	13	59	10	12814|12819|12822|12825|12826|12827|12831|12832|12833|12834|12835|12842|12843	Col11a1|Col15a1|Col18a1|Col3a1|Col4a1|Col4a2|Col5a1|Col5a2|Col6a1|Col6a2|Col6a3|Col1a1|Col1a2	-23
D16_SUB1_MCODE_3	GO Molecular Functions	21	GO:0005201	extracellular matrix structural constituent		-22	81	32	20504	149	22	13	59	10	12814|12819|12822|12825|12826|12827|12831|12832|12833|12834|12835|12842|12843	Col11a1|Col15a1|Col18a1|Col3a1|Col4a1|Col4a2|Col5a1|Col5a2|Col6a1|Col6a2|Col6a3|Col1a1|Col1a2	-20
D16_SUB1_MCODE_3	Reactome Gene Sets	6	R-MMU-1474228	Degradation of the extracellular matrix		-21	94	33	20504	119	22	12	55	11	12814|12819|12822|12825|12826|12827|12831|12832|12833|12834|12842|12843	Col11a1|Col15a1|Col18a1|Col3a1|Col4a1|Col4a2|Col5a1|Col5a2|Col6a1|Col6a2|Col1a1|Col1a2	-19
D16_SUB1_MCODE_3	GO Biological Processes	19	GO:0030198	extracellular matrix organization	19_GO:0009987 cellular process	-20	42	24	20504	312	22	14	64	10	12406|12814|12819|12822|12825|12826|12827|12831|12832|12842|12843|18451|26433|234407	Serpinh1|Col11a1|Col15a1|Col18a1|Col3a1|Col4a1|Col4a2|Col5a1|Col5a2|Col1a1|Col1a2|P4ha1|Plod3|Colgalt1	-18
D16_SUB1_MCODE_3	GO Biological Processes	19	GO:0043062	extracellular structure organization	19_GO:0009987 cellular process	-20	42	24	20504	313	22	14	64	10	12406|12814|12819|12822|12825|12826|12827|12831|12832|12842|12843|18451|26433|234407	Serpinh1|Col11a1|Col15a1|Col18a1|Col3a1|Col4a1|Col4a2|Col5a1|Col5a2|Col1a1|Col1a2|P4ha1|Plod3|Colgalt1	-18
D16_SUB1_MCODE_3	GO Biological Processes	19	GO:0045229	external encapsulating structure organization	19_GO:0009987 cellular process	-20	42	24	20504	314	22	14	64	10	12406|12814|12819|12822|12825|12826|12827|12831|12832|12842|12843|18451|26433|234407	Serpinh1|Col11a1|Col15a1|Col18a1|Col3a1|Col4a1|Col4a2|Col5a1|Col5a2|Col1a1|Col1a2|P4ha1|Plod3|Colgalt1	-18
D16_SUB1_MCODE_3	GO Biological Processes	19	GO:0030199	collagen fibril organization	19_GO:0009987 cellular process	-20	160	40	20504	59	22	10	45	11	12406|12814|12825|12831|12832|12842|12843|18451|26433|234407	Serpinh1|Col11a1|Col3a1|Col5a1|Col5a2|Col1a1|Col1a2|P4ha1|Plod3|Colgalt1	-18
D16_SUB1_MCODE_3	Reactome Gene Sets	6	R-MMU-216083	Integrin cell surface interactions		-19	130	36	20504	70	22	10	45	11	12822|12825|12826|12827|12831|12832|12833|12834|12842|12843	Col18a1|Col3a1|Col4a1|Col4a2|Col5a1|Col5a2|Col6a1|Col6a2|Col1a1|Col1a2	-17
D16_SUB1_MCODE_3	Reactome Gene Sets	6	R-MMU-3000171	Non-integrin membrane-ECM interactions		-17	200	39	20504	38	22	8	36	10	12814|12825|12826|12827|12831|12832|12842|12843	Col11a1|Col3a1|Col4a1|Col4a2|Col5a1|Col5a2|Col1a1|Col1a2	-15
D16_SUB1_MCODE_3	Reactome Gene Sets	6	R-MMU-419037	NCAM1 interactions		-17	340	49	20504	19	22	7	32	9.9	12825|12826|12827|12831|12832|12833|12834	Col3a1|Col4a1|Col4a2|Col5a1|Col5a2|Col6a1|Col6a2	-15
D16_SUB1_MCODE_3	GO Molecular Functions	21	GO:0048407	platelet-derived growth factor binding		-15	470	53	20504	12	22	6	27	9.5	12825|12826|12831|12833|12842|12843	Col3a1|Col4a1|Col5a1|Col6a1|Col1a1|Col1a2	-13
D16_SUB1_MCODE_3	GO Molecular Functions	21	GO:0005198	structural molecule activity		-15	21	16	20504	585	22	13	59	10	12814|12819|12822|12825|12826|12827|12831|12832|12833|12834|12835|12842|12843	Col11a1|Col15a1|Col18a1|Col3a1|Col4a1|Col4a2|Col5a1|Col5a2|Col6a1|Col6a2|Col6a3|Col1a1|Col1a2	-13
D16_SUB1_MCODE_3	Reactome Gene Sets	6	R-MMU-375165	NCAM signaling for neurite out-growth		-15	190	37	20504	34	22	7	32	9.9	12825|12826|12827|12831|12832|12833|12834	Col3a1|Col4a1|Col4a2|Col5a1|Col5a2|Col6a1|Col6a2	-13
D16_SUB1_MCODE_3	Reactome Gene Sets	6	R-MMU-3000178	ECM proteoglycans		-14	150	32	20504	44	22	7	32	9.9	12825|12831|12832|12833|12834|12842|12843	Col3a1|Col5a1|Col5a2|Col6a1|Col6a2|Col1a1|Col1a2	-12
D16_SUB1_MCODE_3	Reactome Gene Sets	6	R-MMU-186797	Signaling by PDGF		-13	120	29	20504	53	22	7	32	9.9	12825|12826|12827|12831|12832|12833|12834	Col3a1|Col4a1|Col4a2|Col5a1|Col5a2|Col6a1|Col6a2	-11
D16_SUB1_MCODE_3	WikiPathways	27	WP85	Focal adhesion		-13	45	20	20504	185	22	9	41	10	12814|12825|12826|12827|12831|12832|12834|12842|12843	Col11a1|Col3a1|Col4a1|Col4a2|Col5a1|Col5a2|Col6a2|Col1a1|Col1a2	-11
D16_SUB1_MCODE_3	Reactome Gene Sets	6	R-MMU-8874081	MET activates PTK2 signaling		-13	210	35	20504	27	22	6	27	9.5	12814|12825|12831|12832|12842|12843	Col11a1|Col3a1|Col5a1|Col5a2|Col1a1|Col1a2	-11
D16_SUB1_MCODE_3	GO Biological Processes	19	GO:0018126	protein hydroxylation	19_GO:0008152 metabolic process	-13	200	34	20504	28	22	6	27	9.5	18451|18452|18453|18822|26432|26433	P4ha1|P4ha2|P4hb|Plod1|Plod2|Plod3	-11
D16_SUB1_MCODE_3	Reactome Gene Sets	6	R-MMU-8875878	MET promotes cell motility		-12	150	30	20504	37	22	6	27	9.5	12814|12825|12831|12832|12842|12843	Col11a1|Col3a1|Col5a1|Col5a2|Col1a1|Col1a2	-10
D16_SUB1_MCODE_3	KEGG Pathway	24	ko04512	ECM-receptor interaction		-12	79	23	20504	83	22	7	32	9.9	12826|12827|12833|12834|12835|12842|12843	Col4a1|Col4a2|Col6a1|Col6a2|Col6a3|Col1a1|Col1a2	-10
D16_SUB1_MCODE_3	KEGG Pathway	24	mmu04512	ECM-receptor interaction		-12	77	23	20504	85	22	7	32	9.9	12826|12827|12833|12834|12835|12842|12843	Col4a1|Col4a2|Col6a1|Col6a2|Col6a3|Col1a1|Col1a2	-10
D16_SUB1_MCODE_3	Reactome Gene Sets	6	R-MMU-9006934	Signaling by Receptor Tyrosine Kinases		-11	23	15	20504	406	22	10	45	11	12814|12825|12826|12827|12831|12832|12833|12834|12842|12843	Col11a1|Col3a1|Col4a1|Col4a2|Col5a1|Col5a2|Col6a1|Col6a2|Col1a1|Col1a2	-9.8
D16_SUB1_MCODE_3	GO Molecular Functions	21	GO:0031418	L-ascorbic acid binding		-11	250	35	20504	19	22	5	23	8.9	18451|18452|18822|26432|26433	P4ha1|P4ha2|Plod1|Plod2|Plod3	-9.5
D16_SUB1_MCODE_3	WikiPathways	27	WP2841	Focal adhesion: PI3K-Akt-mTOR signaling pathway		-11	26	15	20504	322	22	9	41	10	12814|12825|12826|12827|12831|12832|12834|12842|12843	Col11a1|Col3a1|Col4a1|Col4a2|Col5a1|Col5a2|Col6a2|Col1a1|Col1a2	-9.2
D16_SUB1_MCODE_3	GO Molecular Functions	21	GO:0016706	2-oxoglutarate-dependent dioxygenase activity		-10	90	23	20504	62	22	6	27	9.5	18451|18452|18453|18822|26432|26433	P4ha1|P4ha2|P4hb|Plod1|Plod2|Plod3	-8.9
D16_SUB1_MCODE_3	Reactome Gene Sets	6	R-MMU-6806834	Signaling by MET		-9.9	77	21	20504	73	22	6	27	9.5	12814|12825|12831|12832|12842|12843	Col11a1|Col3a1|Col5a1|Col5a2|Col1a1|Col1a2	-8.5
D16_SUB1_MCODE_3	GO Molecular Functions	21	GO:0051213	dioxygenase activity		-9.3	59	19	20504	94	22	6	27	9.5	18451|18452|18453|18822|26432|26433	P4ha1|P4ha2|P4hb|Plod1|Plod2|Plod3	-7.9
D16_SUB1_MCODE_3	Reactome Gene Sets	6	R-MMU-2214320	Anchoring fibril formation		-9.2	290	34	20504	13	22	4	18	8.2	12826|12827|12842|12843	Col4a1|Col4a2|Col1a1|Col1a2	-7.8
D16_SUB1_MCODE_3	GO Molecular Functions	21	GO:0008475	procollagen-lysine 5-dioxygenase activity		-9	930	53	20504	3	22	3	14	7.3	18822|26432|26433	Plod1|Plod2|Plod3	-7.6
D16_SUB1_MCODE_3	KEGG Pathway	24	ko04510	Focal adhesion		-9	33	15	20504	199	22	7	32	9.9	12826|12827|12833|12834|12835|12842|12843	Col4a1|Col4a2|Col6a1|Col6a2|Col6a3|Col1a1|Col1a2	-7.6
D16_SUB1_MCODE_3	KEGG Pathway	24	mmu04510	Focal adhesion		-8.9	32	15	20504	203	22	7	32	9.9	12826|12827|12833|12834|12835|12842|12843	Col4a1|Col4a2|Col6a1|Col6a2|Col6a3|Col1a1|Col1a2	-7.6
D16_SUB1_MCODE_3	GO Biological Processes	19	GO:0097435	supramolecular fiber organization	19_GO:0009987 cellular process	-8.7	12	10	20504	756	22	10	45	11	12406|12814|12825|12831|12832|12842|12843|18451|26433|234407	Serpinh1|Col11a1|Col3a1|Col5a1|Col5a2|Col1a1|Col1a2|P4ha1|Plod3|Colgalt1	-7.4
D16_SUB1_MCODE_3	Reactome Gene Sets	6	R-MMU-2243919	Crosslinking of collagen fibrils		-8.6	220	30	20504	17	22	4	18	8.2	12826|12827|12842|12843	Col4a1|Col4a2|Col1a1|Col1a2	-7.3
D16_SUB1_MCODE_3	GO Molecular Functions	21	GO:0070815	peptidyl-lysine 5-dioxygenase activity		-8.4	700	46	20504	4	22	3	14	7.3	18822|26432|26433	Plod1|Plod2|Plod3	-7.1
D16_SUB1_MCODE_3	Reactome Gene Sets	6	R-MMU-422475	Axon guidance		-8.2	25	13	20504	256	22	7	32	9.9	12825|12826|12827|12831|12832|12833|12834	Col3a1|Col4a1|Col4a2|Col5a1|Col5a2|Col6a1|Col6a2	-6.9
D16_SUB1_MCODE_3	Reactome Gene Sets	6	R-MMU-9675108	Nervous system development		-8.2	25	13	20504	257	22	7	32	9.9	12825|12826|12827|12831|12832|12833|12834	Col3a1|Col4a1|Col4a2|Col5a1|Col5a2|Col6a1|Col6a2	-6.9
D16_SUB1_MCODE_3	GO Molecular Functions	21	GO:0019838	growth factor binding		-8	37	15	20504	151	22	6	27	9.5	12825|12826|12831|12833|12842|12843	Col3a1|Col4a1|Col5a1|Col6a1|Col1a1|Col1a2	-6.8
D16_SUB1_MCODE_3	GO Molecular Functions	21	GO:0004656	procollagen-proline 4-dioxygenase activity		-8	560	41	20504	5	22	3	14	7.3	18451|18452|18453	P4ha1|P4ha2|P4hb	-6.7
D16_SUB1_MCODE_3	WikiPathways	27	WP3855	Dysregulated miRNA targeting in insulin/PI3K-AKT signaling		-7.8	140	24	20504	26	22	4	18	8.2	12825|12827|12842|12843	Col3a1|Col4a2|Col1a1|Col1a2	-6.6
D16_SUB1_MCODE_3	GO Biological Processes	19	GO:0071230	cellular response to amino acid stimulus	19_GO:0050896 response to stimulus	-7.7	32	14	20504	173	22	6	27	9.5	12825|12826|12832|12833|12842|12843	Col3a1|Col4a1|Col5a2|Col6a1|Col1a1|Col1a2	-6.4
D16_SUB1_MCODE_3	GO Biological Processes	19	GO:0043200	response to amino acid	19_GO:0050896 response to stimulus	-7.5	30	13	20504	187	22	6	27	9.5	12825|12826|12832|12833|12842|12843	Col3a1|Col4a1|Col5a2|Col6a1|Col1a1|Col1a2	-6.3
D16_SUB1_MCODE_3	GO Biological Processes	19	GO:0071229	cellular response to acid chemical	19_GO:0050896 response to stimulus	-7.5	30	13	20504	187	22	6	27	9.5	12825|12826|12832|12833|12842|12843	Col3a1|Col4a1|Col5a2|Col6a1|Col1a1|Col1a2	-6.3
D16_SUB1_MCODE_3	GO Molecular Functions	21	GO:0048029	monosaccharide binding		-7.4	51	16	20504	91	22	5	23	8.9	18451|18452|18822|26432|26433	P4ha1|P4ha2|Plod1|Plod2|Plod3	-6.2
D16_SUB1_MCODE_3	KEGG Pathway	24	ko04151	PI3K-Akt signaling pathway		-7.3	19	11	20504	346	22	7	32	9.9	12826|12827|12833|12834|12835|12842|12843	Col4a1|Col4a2|Col6a1|Col6a2|Col6a3|Col1a1|Col1a2	-6.1
D16_SUB1_MCODE_3	KEGG Pathway	24	mmu04151	PI3K-Akt signaling pathway		-7.3	19	11	20504	350	22	7	32	9.9	12826|12827|12833|12834|12835|12842|12843	Col4a1|Col4a2|Col6a1|Col6a2|Col6a3|Col1a1|Col1a2	-6.1
D16_SUB1_MCODE_3	GO Molecular Functions	21	GO:0031545	peptidyl-proline 4-dioxygenase activity		-7.2	350	32	20504	8	22	3	14	7.3	18451|18452|18453	P4ha1|P4ha2|P4hb	-6.1
D16_SUB1_MCODE_3	GO Molecular Functions	21	GO:0019798	procollagen-proline dioxygenase activity		-7.2	350	32	20504	8	22	3	14	7.3	18451|18452|18453	P4ha1|P4ha2|P4hb	-6.1
D16_SUB1_MCODE_3	KEGG Pathway	24	ko04933	AGE-RAGE signaling pathway in diabetic complications		-7.2	47	15	20504	100	22	5	23	8.9	12825|12826|12827|12842|12843	Col3a1|Col4a1|Col4a2|Col1a1|Col1a2	-6
D16_SUB1_MCODE_3	GO Biological Processes	19	GO:0001101	response to acid chemical	19_GO:0050896 response to stimulus	-7.2	27	12	20504	209	22	6	27	9.5	12825|12826|12832|12833|12842|12843	Col3a1|Col4a1|Col5a2|Col6a1|Col1a1|Col1a2	-6
D16_SUB1_MCODE_3	KEGG Pathway	24	mmu04933	AGE-RAGE signaling pathway in diabetic complications		-7.1	45	15	20504	103	22	5	23	8.9	12825|12826|12827|12842|12843	Col3a1|Col4a1|Col4a2|Col1a1|Col1a2	-6
D16_SUB1_MCODE_3	GO Biological Processes	19	GO:0018208	peptidyl-proline modification	19_GO:0008152 metabolic process	-7.1	96	19	20504	39	22	4	18	8.2	18451|18452|18453|19035	P4ha1|P4ha2|P4hb|Ppib	-5.9
D16_SUB1_MCODE_3	KEGG Pathway	24	ko05146	Amoebiasis		-7.1	44	15	20504	106	22	5	23	8.9	12825|12826|12827|12842|12843	Col3a1|Col4a1|Col4a2|Col1a1|Col1a2	-5.9
D16_SUB1_MCODE_3	GO Biological Processes	19	GO:0017185	peptidyl-lysine hydroxylation	19_GO:0008152 metabolic process	-7	310	30	20504	9	22	3	14	7.3	18822|26432|26433	Plod1|Plod2|Plod3	-5.9
D16_SUB1_MCODE_3	KEGG Pathway	24	mmu05146	Amoebiasis		-7	43	14	20504	108	22	5	23	8.9	12825|12826|12827|12842|12843	Col3a1|Col4a1|Col4a2|Col1a1|Col1a2	-5.9
D16_SUB1_MCODE_3	GO Molecular Functions	21	GO:0016705	oxidoreductase activity, acting on paired donors, with incorporation or reduction of molecular oxygen		-6.9	24	12	20504	229	22	6	27	9.5	18451|18452|18453|18822|26432|26433	P4ha1|P4ha2|P4hb|Plod1|Plod2|Plod3	-5.8
D16_SUB1_MCODE_3	GO Biological Processes	19	GO:0032963	collagen metabolic process	19_GO:0008152 metabolic process	-6.8	39	14	20504	119	22	5	23	8.9	12406|12831|12842|12843|26433	Serpinh1|Col5a1|Col1a1|Col1a2|Plod3	-5.7
D16_SUB1_MCODE_3	GO Biological Processes	19	GO:0018401	peptidyl-proline hydroxylation to 4-hydroxy-L-proline	19_GO:0008152 metabolic process	-6.8	250	28	20504	11	22	3	14	7.3	18451|18452|18453	P4ha1|P4ha2|P4hb	-5.6
D16_SUB1_MCODE_3	GO Molecular Functions	21	GO:0031543	peptidyl-proline dioxygenase activity		-6.6	230	26	20504	12	22	3	14	7.3	18451|18452|18453	P4ha1|P4ha2|P4hb	-5.5
D16_SUB1_MCODE_3	GO Biological Processes	19	GO:0038063	collagen-activated tyrosine kinase receptor signaling pathway	19_GO:0023052 signaling	-6.6	230	26	20504	12	22	3	14	7.3	12826|12827|12842	Col4a1|Col4a2|Col1a1	-5.5
D16_SUB1_MCODE_3	GO Molecular Functions	21	GO:0019842	vitamin binding		-6.5	34	13	20504	137	22	5	23	8.9	18451|18452|18822|26432|26433	P4ha1|P4ha2|Plod1|Plod2|Plod3	-5.4
D16_SUB1_MCODE_3	Reactome Gene Sets	6	R-MMU-1266738	Developmental Biology		-6.5	14	9.4	20504	454	22	7	32	9.9	12825|12826|12827|12831|12832|12833|12834	Col3a1|Col4a1|Col4a2|Col5a1|Col5a2|Col6a1|Col6a2	-5.4
D16_SUB1_MCODE_3	GO Biological Processes	19	GO:0019511	peptidyl-proline hydroxylation	19_GO:0008152 metabolic process	-6.4	200	24	20504	14	22	3	14	7.3	18451|18452|18453	P4ha1|P4ha2|P4hb	-5.3
D16_SUB1_MCODE_3	KEGG Pathway	24	ko00310	Lysine degradation		-6.4	63	16	20504	59	22	4	18	8.2	18822|26432|26433|234407	Plod1|Plod2|Plod3|Colgalt1	-5.3
D16_SUB1_MCODE_3	GO Molecular Functions	21	GO:0043177	organic acid binding		-6.3	31	12	20504	150	22	5	23	8.9	18451|18452|18822|26432|26433	P4ha1|P4ha2|Plod1|Plod2|Plod3	-5.3
D16_SUB1_MCODE_3	KEGG Pathway	24	mmu00310	Lysine degradation		-6.3	61	15	20504	61	22	4	18	8.2	18822|26432|26433|234407	Plod1|Plod2|Plod3|Colgalt1	-5.2
D16_SUB1_MCODE_3	GO Biological Processes	19	GO:0038065	collagen-activated signaling pathway	19_GO:0023052 signaling	-6.2	170	23	20504	16	22	3	14	7.3	12826|12827|12842	Col4a1|Col4a2|Col1a1	-5.2
D16_SUB1_MCODE_3	GO Biological Processes	19	GO:0001568	blood vessel development	19_GO:0032502 developmental process	-6.2	9.9	8.2	20504	752	22	8	36	10	12819|12822|12825|12826|12827|12831|12842|12843	Col15a1|Col18a1|Col3a1|Col4a1|Col4a2|Col5a1|Col1a1|Col1a2	-5.1
D16_SUB1_MCODE_3	GO Biological Processes	19	GO:0001886	endothelial cell morphogenesis	19_GO:0032502 developmental process	-6.1	160	22	20504	17	22	3	14	7.3	12819|12822|26433	Col15a1|Col18a1|Plod3	-5.1
D16_SUB1_MCODE_3	GO Molecular Functions	21	GO:0005506	iron ion binding		-6	27	11	20504	171	22	5	23	8.9	18451|18452|18822|26432|26433	P4ha1|P4ha2|Plod1|Plod2|Plod3	-5
D16_SUB1_MCODE_3	GO Biological Processes	19	GO:0001944	vasculature development	19_GO:0032502 developmental process	-6	9.4	7.9	20504	789	22	8	36	10	12819|12822|12825|12826|12827|12831|12842|12843	Col15a1|Col18a1|Col3a1|Col4a1|Col4a2|Col5a1|Col1a1|Col1a2	-5
D16_SUB1_MCODE_3	GO Biological Processes	19	GO:0001501	skeletal system development	19_GO:0032502 developmental process	-5.9	12	8.4	20504	552	22	7	32	9.9	12406|12814|12825|12832|12842|12843|19035	Serpinh1|Col11a1|Col3a1|Col5a2|Col1a1|Col1a2|Ppib	-4.9
D16_SUB1_MCODE_3	GO Molecular Functions	21	GO:0031406	carboxylic acid binding		-5.9	25	11	20504	187	22	5	23	8.9	18451|18452|18822|26432|26433	P4ha1|P4ha2|Plod1|Plod2|Plod3	-4.8
D16_SUB1_MCODE_3	Reactome Gene Sets	6	R-MMU-3000157	Laminin interactions		-5.6	110	18	20504	25	22	3	14	7.3	12822|12826|12827	Col18a1|Col4a1|Col4a2	-4.6
D16_SUB1_MCODE_3	WikiPathways	27	WP458	Inflammatory response pathway		-5.4	93	17	20504	30	22	3	14	7.3	12825|12842|12843	Col3a1|Col1a1|Col1a2	-4.4
D16_SUB1_MCODE_3	GO Molecular Functions	21	GO:0030246	carbohydrate binding		-5	17	8.7	20504	275	22	5	23	8.9	18451|18452|18822|26432|26433	P4ha1|P4ha2|Plod1|Plod2|Plod3	-4.1
D16_SUB1_MCODE_3	GO Biological Processes	19	GO:0061448	connective tissue development	19_GO:0032502 developmental process	-4.9	16	8.5	20504	288	22	5	23	8.9	12406|12814|12825|12831|12842	Serpinh1|Col11a1|Col3a1|Col5a1|Col1a1	-4
D16_SUB1_MCODE_3	GO Biological Processes	19	GO:0043588	skin development	19_GO:0032502 developmental process	-4.9	16	8.4	20504	294	22	5	23	8.9	12825|12831|12832|12842|12843	Col3a1|Col5a1|Col5a2|Col1a1|Col1a2	-4
D16_SUB1_MCODE_3	GO Biological Processes	19	GO:0085029	extracellular matrix assembly	19_GO:0009987 cellular process	-4.9	65	14	20504	43	22	3	14	7.3	12825|12843|26433	Col3a1|Col1a2|Plod3	-4
D16_SUB1_MCODE_3	GO Biological Processes	19	GO:0003382	epithelial cell morphogenesis	19_GO:0032502 developmental process	-4.7	58	13	20504	48	22	3	14	7.3	12819|12822|26433	Col15a1|Col18a1|Plod3	-3.9
D16_SUB1_MCODE_3	GO Biological Processes	19	GO:0032964	collagen biosynthetic process	19_GO:0008152 metabolic process	-4.6	51	12	20504	55	22	3	14	7.3	12406|12831|12842	Serpinh1|Col5a1|Col1a1	-3.7
D16_SUB1_MCODE_3	GO Biological Processes	19	GO:0071417	cellular response to organonitrogen compound	19_GO:0050896 response to stimulus	-4.3	8.7	6.5	20504	646	22	6	27	9.5	12825|12826|12832|12833|12842|12843	Col3a1|Col4a1|Col5a2|Col6a1|Col1a1|Col1a2	-3.5
D16_SUB1_MCODE_3	GO Biological Processes	19	GO:0060350	endochondral bone morphogenesis	19_GO:0032502 developmental process	-4.3	42	11	20504	66	22	3	14	7.3	12406|12825|12842	Serpinh1|Col3a1|Col1a1	-3.5
D16_SUB1_MCODE_3	GO Biological Processes	19	GO:0001885	endothelial cell development	19_GO:0032502 developmental process	-4.2	37	10	20504	75	22	3	14	7.3	12819|12822|26433	Col15a1|Col18a1|Plod3	-3.3
D16_SUB1_MCODE_3	GO Biological Processes	19	GO:0051216	cartilage development	19_GO:0032502 developmental process	-4.2	18	8	20504	212	22	4	18	8.2	12406|12814|12825|12842	Serpinh1|Col11a1|Col3a1|Col1a1	-3.3
D16_SUB1_MCODE_3	GO Biological Processes	19	GO:1901699	cellular response to nitrogen compound	19_GO:0050896 response to stimulus	-4.1	7.8	6.1	20504	717	22	6	27	9.5	12825|12826|12832|12833|12842|12843	Col3a1|Col4a1|Col5a2|Col6a1|Col1a1|Col1a2	-3.3
D16_SUB1_MCODE_3	GO Molecular Functions	21	GO:0005518	collagen binding		-4.1	35	10	20504	80	22	3	14	7.3	12406|12833|12834	Serpinh1|Col6a1|Col6a2	-3.3
D16_SUB1_MCODE_3	GO Molecular Functions	21	GO:0046332	SMAD binding		-4	33	9.6	20504	86	22	3	14	7.3	12825|12832|12843	Col3a1|Col5a2|Col1a2	-3.2
D16_SUB1_MCODE_3	GO Biological Processes	19	GO:0060348	bone development	19_GO:0032502 developmental process	-3.9	15	7.4	20504	244	22	4	18	8.2	12406|12825|12842|19035	Serpinh1|Col3a1|Col1a1|Ppib	-3.1
D16_SUB1_MCODE_3	GO Molecular Functions	21	GO:0016491	oxidoreductase activity		-3.8	7	5.7	20504	799	22	6	27	9.5	18451|18452|18453|18822|26432|26433	P4ha1|P4ha2|P4hb|Plod1|Plod2|Plod3	-3.1
D16_SUB1_MCODE_3	GO Biological Processes	19	GO:0048705	skeletal system morphogenesis	19_GO:0032502 developmental process	-3.8	14	7.1	20504	261	22	4	18	8.2	12406|12814|12825|12842	Serpinh1|Col11a1|Col3a1|Col1a1	-3
D16_SUB1_MCODE_3	Reactome Gene Sets	6	R-MMU-198933	Immunoregulatory interactions between a Lymphoid and a non-Lymphoid cell		-3.8	28	8.9	20504	100	22	3	14	7.3	12825|12842|12843	Col3a1|Col1a1|Col1a2	-3
D16_SUB1_MCODE_3	GO Biological Processes	19	GO:0060349	bone morphogenesis	19_GO:0032502 developmental process	-3.7	26	8.5	20504	108	22	3	14	7.3	12406|12825|12842	Serpinh1|Col3a1|Col1a1	-2.9
D16_SUB1_MCODE_3	GO Biological Processes	19	GO:0002062	chondrocyte differentiation	19_GO:0032502 developmental process	-3.6	24	8.2	20504	116	22	3	14	7.3	12406|12814|12825	Serpinh1|Col11a1|Col3a1	-2.9
D16_SUB1_MCODE_3	GO Biological Processes	19	GO:0045446	endothelial cell differentiation	19_GO:0032502 developmental process	-3.6	23	8.1	20504	119	22	3	14	7.3	12819|12822|26433	Col15a1|Col18a1|Plod3	-2.8
D16_SUB1_MCODE_3	KEGG Pathway	24	mmu04611	Platelet activation		-3.5	22	7.8	20504	126	22	3	14	7.3	12825|12842|12843	Col3a1|Col1a1|Col1a2	-2.8
D16_SUB1_MCODE_3	GO Biological Processes	19	GO:0003158	endothelium development	19_GO:0032502 developmental process	-3.4	21	7.5	20504	135	22	3	14	7.3	12819|12822|26433	Col15a1|Col18a1|Plod3	-2.7
D16_SUB1_MCODE_3	GO Biological Processes	19	GO:0048514	blood vessel morphogenesis	19_GO:0032502 developmental process	-3.3	7.1	5.2	20504	654	22	5	23	8.9	12819|12822|12825|12826|12827	Col15a1|Col18a1|Col3a1|Col4a1|Col4a2	-2.6
D16_SUB1_MCODE_3	GO Biological Processes	19	GO:0048729	tissue morphogenesis	19_GO:0032502 developmental process	-3.2	6.8	5	20504	690	22	5	23	8.9	12814|12825|12826|12831|26433	Col11a1|Col3a1|Col4a1|Col5a1|Plod3	-2.5
D16_SUB1_MCODE_3	GO Molecular Functions	21	GO:0002020	protease binding		-3	15	6.3	20504	184	22	3	14	7.3	12825|12842|12843	Col3a1|Col1a1|Col1a2	-2.4
D16_SUB1_MCODE_3	GO Biological Processes	19	GO:0071560	cellular response to transforming growth factor beta stimulus	19_GO:0050896 response to stimulus	-2.7	12	5.6	20504	229	22	3	14	7.3	12825|12827|12843	Col3a1|Col4a2|Col1a2	-2.1
D16_SUB1_MCODE_3	GO Biological Processes	19	GO:0071559	response to transforming growth factor beta	19_GO:0050896 response to stimulus	-2.7	12	5.5	20504	234	22	3	14	7.3	12825|12827|12843	Col3a1|Col4a2|Col1a2	-2.1
D16_SUB1_MCODE_3	GO Biological Processes	19	GO:0001525	angiogenesis	19_GO:0032502 developmental process	-2.6	6.9	4.6	20504	541	22	4	18	8.2	12819|12822|12826|12827	Col15a1|Col18a1|Col4a1|Col4a2	-2
D16_SUB1_MCODE_3	GO Biological Processes	19	GO:0002064	epithelial cell development	19_GO:0032502 developmental process	-2.6	10	5.1	20504	267	22	3	14	7.3	12819|12822|26433	Col15a1|Col18a1|Plod3	-2
D16_SUB1_MCODE_3	GO Biological Processes	19	GO:0007423	sensory organ development	19_GO:0032502 developmental process	-2.3	5.7	4	20504	651	22	4	18	8.2	12814|12826|12831|12832	Col11a1|Col4a1|Col5a1|Col5a2	-1.8
D16_SUB1_MCODE_3	GO Biological Processes	19	GO:0090596	sensory organ morphogenesis	19_GO:0032502 developmental process	-2.3	8.7	4.6	20504	321	22	3	14	7.3	12814|12831|12832	Col11a1|Col5a1|Col5a2	-1.8
D16_SUB1_MCODE_3	GO Biological Processes	19	GO:0042060	wound healing	19_GO:0050896 response to stimulus	-2.2	7.7	4.2	20504	363	22	3	14	7.3	12825|12831|12842	Col3a1|Col5a1|Col1a1	-1.7
D16_SUB1_MCODE_3	GO Biological Processes	19	GO:0031589	cell-substrate adhesion	19_GO:0022610 biological adhesion	-2.2	7.6	4.2	20504	366	22	3	14	7.3	12825|12842|18453	Col3a1|Col1a1|P4hb	-1.6
D16_SUB1_MCODE_3	GO Biological Processes	19	GO:0018205	peptidyl-lysine modification	19_GO:0008152 metabolic process	-2.1	7.4	4.1	20504	376	22	3	14	7.3	18822|26432|26433	Plod1|Plod2|Plod3	-1.6
D16_SUB1_MCODE_4	GO Biological Processes	19	GO:0034470	ncRNA processing	19_GO:0008152 metabolic process	-7.9	31	13	20504	362	11	6	55	15	20044|28114|64934|67755|69237|69663	Rps14|Nsun2|Pes1|Ddx47|Gtpbp4|Ddx51	-6.7
D16_SUB1_MCODE_4	Reactome Gene Sets	6	R-MMU-72312	rRNA processing		-7.8	55	16	20504	171	11	5	45	15	20044|30877|64934|67755|267019	Rps14|Gnl3|Pes1|Ddx47|Rps15a	-6.5
D16_SUB1_MCODE_4	Reactome Gene Sets	6	R-MMU-8868773	rRNA processing in the nucleus and cytosol		-7.8	55	16	20504	171	11	5	45	15	20044|30877|64934|67755|267019	Rps14|Gnl3|Pes1|Ddx47|Rps15a	-6.5
D16_SUB1_MCODE_4	Reactome Gene Sets	6	R-MMU-6791226	Major pathway of rRNA processing in the nucleolus and cytosol		-7.8	55	16	20504	171	11	5	45	15	20044|30877|64934|67755|267019	Rps14|Gnl3|Pes1|Ddx47|Rps15a	-6.5
D16_SUB1_MCODE_4	GO Biological Processes	19	GO:0034660	ncRNA metabolic process	19_GO:0008152 metabolic process	-7.3	25	12	20504	456	11	6	55	15	20044|28114|64934|67755|69237|69663	Rps14|Nsun2|Pes1|Ddx47|Gtpbp4|Ddx51	-6.1
D16_SUB1_MCODE_4	GO Biological Processes	19	GO:0006364	rRNA processing	19_GO:0008152 metabolic process	-7.3	44	14	20504	214	11	5	45	15	20044|64934|67755|69237|69663	Rps14|Pes1|Ddx47|Gtpbp4|Ddx51	-6.1
D16_SUB1_MCODE_4	GO Biological Processes	19	GO:0016072	rRNA metabolic process	19_GO:0008152 metabolic process	-7.2	42	14	20504	224	11	5	45	15	20044|64934|67755|69237|69663	Rps14|Pes1|Ddx47|Gtpbp4|Ddx51	-6
D16_SUB1_MCODE_4	GO Biological Processes	19	GO:0042254	ribosome biogenesis	19_GO:0009987 cellular process	-6.6	31	12	20504	296	11	5	45	15	20044|64934|67755|69237|69663	Rps14|Pes1|Ddx47|Gtpbp4|Ddx51	-5.5
D16_SUB1_MCODE_4	GO Biological Processes	19	GO:0022613	ribonucleoprotein complex biogenesis	19_GO:0009987 cellular process	-5.9	23	10	20504	412	11	5	45	15	20044|64934|67755|69237|69663	Rps14|Pes1|Ddx47|Gtpbp4|Ddx51	-4.9
D16_SUB1_MCODE_4	Reactome Gene Sets	6	R-MMU-8953854	Metabolism of RNA		-5.3	17	8.8	20504	546	11	5	45	15	20044|30877|64934|67755|267019	Rps14|Gnl3|Pes1|Ddx47|Rps15a	-4.3
D16_SUB1_MCODE_4	WikiPathways	27	WP310	mRNA processing		-4.2	16	7.7	20504	453	11	4	36	15	15384|20044|50926|52874	Hnrnpab|Rps14|Hnrnpdl|Pum3	-3.4
D16_SUB1_MCODE_4	GO Molecular Functions	21	GO:0003729	mRNA binding		-3.1	15	6.4	20504	366	11	3	27	13	20044|30877|52874	Rps14|Gnl3|Pum3	-2.4
D16_SUB1_MCODE_4	GO Molecular Functions	21	GO:0140098	catalytic activity, acting on RNA		-3.1	15	6.3	20504	373	11	3	27	13	28114|67755|69663	Nsun2|Ddx47|Ddx51	-2.4
D16_SUB1_MCODE_4	GO Molecular Functions	21	GO:0140640	catalytic activity, acting on a nucleic acid		-2.5	9.8	4.9	20504	573	11	3	27	13	28114|67755|69663	Nsun2|Ddx47|Ddx51	-1.9
D16_SUB1_MCODE_4	GO Biological Processes	19	GO:0016071	mRNA metabolic process	19_GO:0008152 metabolic process	-2.3	8.3	4.5	20504	675	11	3	27	13	28114|50926|67755	Nsun2|Hnrnpdl|Ddx47	-1.8
D16_SUB1_MCODE_5	KEGG Functional Sets	26	mmu_M00359	Aminoacyl-tRNA biosynthesis, eukaryotes		-16	460	53	20504	38	7	6	86	13	70223|104458|105148|107045|216443|353172	Nars|Rars|Iars|Lars|Mars1|Gars	-14
D16_SUB1_MCODE_5	KEGG Functional Sets	26	M00359	Aminoacyl-tRNA biosynthesis, eukaryotes		-16	460	53	20504	38	7	6	86	13	70223|104458|105148|107045|216443|353172	Nars|Rars|Iars|Lars|Mars1|Gars	-14
D16_SUB1_MCODE_5	GO Biological Processes	19	GO:0006418	tRNA aminoacylation for protein translation	19_GO:0008152 metabolic process	-16	440	51	20504	40	7	6	86	13	70223|104458|105148|107045|216443|353172	Nars|Rars|Iars|Lars|Mars1|Gars	-14
D16_SUB1_MCODE_5	GO Molecular Functions	21	GO:0004812	aminoacyl-tRNA ligase activity		-16	430	51	20504	41	7	6	86	13	70223|104458|105148|107045|216443|353172	Nars|Rars|Iars|Lars|Mars1|Gars	-14
D16_SUB1_MCODE_5	GO Molecular Functions	21	GO:0016875	ligase activity, forming carbon-oxygen bonds		-16	430	51	20504	41	7	6	86	13	70223|104458|105148|107045|216443|353172	Nars|Rars|Iars|Lars|Mars1|Gars	-14
D16_SUB1_MCODE_5	GO Biological Processes	19	GO:0043039	tRNA aminoacylation	19_GO:0008152 metabolic process	-15	410	49	20504	43	7	6	86	13	70223|104458|105148|107045|216443|353172	Nars|Rars|Iars|Lars|Mars1|Gars	-14
D16_SUB1_MCODE_5	GO Biological Processes	19	GO:0043038	amino acid activation	19_GO:0008152 metabolic process	-15	400	49	20504	44	7	6	86	13	70223|104458|105148|107045|216443|353172	Nars|Rars|Iars|Lars|Mars1|Gars	-14
D16_SUB1_MCODE_5	KEGG Pathway	24	ko00970	Aminoacyl-tRNA biosynthesis		-14	270	40	20504	66	7	6	86	13	70223|104458|105148|107045|216443|353172	Nars|Rars|Iars|Lars|Mars1|Gars	-13
D16_SUB1_MCODE_5	KEGG Pathway	24	mmu00970	Aminoacyl-tRNA biosynthesis		-14	260	40	20504	67	7	6	86	13	70223|104458|105148|107045|216443|353172	Nars|Rars|Iars|Lars|Mars1|Gars	-12
D16_SUB1_MCODE_5	GO Biological Processes	19	GO:0006520	cellular amino acid metabolic process	19_GO:0008152 metabolic process	-13	80	23	20504	257	7	7	100	13	57320|70223|104458|105148|107045|216443|353172	Park7|Nars|Rars|Iars|Lars|Mars1|Gars	-12
D16_SUB1_MCODE_5	GO Molecular Functions	21	GO:0140101	catalytic activity, acting on a tRNA		-13	150	30	20504	120	7	6	86	13	70223|104458|105148|107045|216443|353172	Nars|Rars|Iars|Lars|Mars1|Gars	-11
D16_SUB1_MCODE_5	GO Molecular Functions	21	GO:0016874	ligase activity		-12	110	25	20504	164	7	6	86	13	70223|104458|105148|107045|216443|353172	Nars|Rars|Iars|Lars|Mars1|Gars	-10
D16_SUB1_MCODE_5	GO Biological Processes	19	GO:0006399	tRNA metabolic process	19_GO:0008152 metabolic process	-12	100	25	20504	168	7	6	86	13	70223|104458|105148|107045|216443|353172	Nars|Rars|Iars|Lars|Mars1|Gars	-10
D16_SUB1_MCODE_5	GO Molecular Functions	21	GO:0140098	catalytic activity, acting on RNA		-9.6	47	17	20504	373	7	6	86	13	70223|104458|105148|107045|216443|353172	Nars|Rars|Iars|Lars|Mars1|Gars	-8.2
D16_SUB1_MCODE_5	GO Biological Processes	19	GO:0034660	ncRNA metabolic process	19_GO:0008152 metabolic process	-9.1	39	15	20504	456	7	6	86	13	70223|104458|105148|107045|216443|353172	Nars|Rars|Iars|Lars|Mars1|Gars	-7.8
D16_SUB1_MCODE_5	GO Molecular Functions	21	GO:0140640	catalytic activity, acting on a nucleic acid		-8.5	31	13	20504	573	7	6	86	13	70223|104458|105148|107045|216443|353172	Nars|Rars|Iars|Lars|Mars1|Gars	-7.2
D16_SUB1_MCODE_5	GO Biological Processes	19	GO:0006412	translation	19_GO:0008152 metabolic process	-8.1	26	12	20504	677	7	6	86	13	70223|104458|105148|107045|216443|353172	Nars|Rars|Iars|Lars|Mars1|Gars	-6.8
D16_SUB1_MCODE_5	GO Biological Processes	19	GO:0043043	peptide biosynthetic process	19_GO:0008152 metabolic process	-8	25	12	20504	701	7	6	86	13	70223|104458|105148|107045|216443|353172	Nars|Rars|Iars|Lars|Mars1|Gars	-6.7
D16_SUB1_MCODE_5	GO Molecular Functions	21	GO:0000049	tRNA binding		-5.9	130	19	20504	70	7	3	43	19	104458|105148|216443	Rars|Iars|Mars1	-4.9
D4	Reactome Gene Sets	6	R-MMU-8953854	Metabolism of RNA		-78	9	30	20504	546	494	118	24	1.9	11834|11991|12572|13204|13681|14105|14113|15381|15382|15388|15507|16549|16785|17975|19179|19655|19899|19921|19942|19943|19951|19981|19989|20005|20044|20054|20055|20068|20085|20090|20091|20103|20104|20116|20462|20624|20637|20826|21762|22121|22123|22608|22631|26961|27050|27207|27966|27993|28000|30877|51792|51796|52705|53319|53379|54127|55989|56086|56095|56200|59015|64934|66164|66475|66481|66511|670…	Aqr|Hnrnpd|Cdk7|Dhx15|Eif4a1|Srsf10|Fbl|Hnrnpc|Hnrnpa1|Hnrnpl|Hspb1|Khsrp|Rpsa|Ncl|Psmc1|Rbmx|Rpl18|Rpl19|Rpl27|Rpl28|Rpl32|Rpl37a|Rpl7|Rpl9|Rps14|Rps15|Rps16|Rps17|Rps19|Rps29|Rps3a1|Rps5|Rps6|Rps8|Tra2b|Eftud2|Snrnp70|Snu13|Psmd2|Rpl13a|Psmd3|Ybx1|Ywhaz|Rpl8|Rps3|Rps11|Rrp9|Imp4|Prpf19|Gnl3|Ppp2r1a|Srrm1|Krr1|Nxf1|Hnrnpa2b1|Rps28|Nop58|Set|Ftsj3|Ddx21|Nup160|Pes1|Nip7|Rps23|Rps21|Chtop|Psmc6|Rp…	-75
D4	GO Biological Processes	19	GO:0022613	ribonucleoprotein complex biogenesis	19_GO:0009987 cellular process	-66	9.7	28	20504	412	494	96	19	1.8	13205|13669|14105|14113|14645|15516|16418|16785|17975|18114|18150|18432|19655|19942|19989|20044|20054|20055|20068|20085|20103|20104|20116|20826|20935|22121|22596|24015|27966|27993|28000|28126|52513|52705|54127|55944|55989|56095|56195|56200|59050|64934|66164|66229|66254|66481|66942|67040|67115|67134|67205|67459|67619|67755|67920|67941|67949|68077|68966|68988|69072|69237|69663|69902|70285|70683|707…	Ddx3x|Eif3a|Srsf10|Fbl|Glul|Hsp90ab1|Eif6|Rpsa|Ncl|Rrp1|Npm3|Mybbp1a|Rbmx|Rpl27|Rpl7|Rps14|Rps15|Rps16|Rps17|Rps19|Rps5|Rps6|Rps8|Snu13|Surf6|Rpl13a|Xrcc5|Abce1|Rrp9|Imp4|Prpf19|Nop16|Ddx56|Krr1|Rps28|Eif3d|Nop58|Ftsj3|Ptbp2|Ddx21|Nsa2|Pes1|Nip7|Rpl7l1|Dimt1|Rps21|Ddx18|Ddx17|Rpl14|Nop56|Utp11|Nvl|Nob1|Ddx47|Mak16|Rps27l|Nifk|Nop53|Ngdn|Prpf31|Ebna1bp2|Gtpbp4|Ddx51|Mrto4|Rpf1|Utp20|Prpf3|Ddx54|Wd…	-63
D4	GO Biological Processes	19	GO:0042254	ribosome biogenesis	19_GO:0009987 cellular process	-58	11	27	20504	296	494	78	16	1.6	13205|14113|14645|16418|16785|17975|18114|18150|18432|19942|19989|20044|20054|20055|20068|20085|20103|20104|20116|20826|20935|22596|24015|27966|27993|28126|52513|52705|54127|55989|56095|56200|59050|64934|66164|66229|66254|66481|66942|67040|67115|67134|67205|67459|67619|67755|67920|67941|67949|68077|68966|69072|69237|69663|69902|70285|70683|71990|72515|72554|74035|75416|75751|76130|78394|98956|100…	Ddx3x|Fbl|Glul|Eif6|Rpsa|Ncl|Rrp1|Npm3|Mybbp1a|Rpl27|Rpl7|Rps14|Rps15|Rps16|Rps17|Rps19|Rps5|Rps6|Rps8|Snu13|Surf6|Xrcc5|Abce1|Rrp9|Imp4|Nop16|Ddx56|Krr1|Rps28|Nop58|Ftsj3|Ddx21|Nsa2|Pes1|Nip7|Rpl7l1|Dimt1|Rps21|Ddx18|Ddx17|Rpl14|Nop56|Utp11|Nvl|Nob1|Ddx47|Mak16|Rps27l|Nifk|Nop53|Ngdn|Ebna1bp2|Gtpbp4|Ddx51|Mrto4|Rpf1|Utp20|Ddx54|Wdr43|Utp14a|Nol9|Nop14|Ipo4|Las1l|Ddx52|Nat10|Mdn1|Wdr74|Rrp12|Nop2…	-55
D4	Reactome Gene Sets	6	R-MMU-6791226	Major pathway of rRNA processing in the nucleolus and cytosol		-54	15	28	20504	171	494	61	12	1.5	14113|16785|17975|19899|19921|19942|19943|19951|19981|19989|20005|20044|20054|20055|20068|20085|20090|20091|20103|20104|20116|20826|22121|26961|27050|27207|27966|27993|30877|52705|54127|55989|56095|56200|64934|66164|66475|66481|67115|67134|67205|67248|67427|67619|67755|67941|68052|68436|69072|72515|72554|74035|75416|76130|76808|76846|78394|110954|114641|270106|100503670	Fbl|Rpsa|Ncl|Rpl18|Rpl19|Rpl27|Rpl28|Rpl32|Rpl37a|Rpl7|Rpl9|Rps14|Rps15|Rps16|Rps17|Rps19|Rps29|Rps3a1|Rps5|Rps6|Rps8|Snu13|Rpl13a|Rpl8|Rps3|Rps11|Rrp9|Imp4|Gnl3|Krr1|Rps28|Nop58|Ftsj3|Ddx21|Pes1|Nip7|Rps23|Rps21|Rpl14|Nop56|Utp11|Rpl39|Rps20|Nob1|Ddx47|Rps27l|Rps13|Rpl34|Ebna1bp2|Wdr43|Utp14a|Nol9|Nop14|Las1l|Rpl18a|Rps9|Ddx52|Rpl10|Rpl31|Rpl13|Rpl5	-51
D4	Reactome Gene Sets	6	R-MMU-72312	rRNA processing		-54	15	28	20504	171	494	61	12	1.5	14113|16785|17975|19899|19921|19942|19943|19951|19981|19989|20005|20044|20054|20055|20068|20085|20090|20091|20103|20104|20116|20826|22121|26961|27050|27207|27966|27993|30877|52705|54127|55989|56095|56200|64934|66164|66475|66481|67115|67134|67205|67248|67427|67619|67755|67941|68052|68436|69072|72515|72554|74035|75416|76130|76808|76846|78394|110954|114641|270106|100503670	Fbl|Rpsa|Ncl|Rpl18|Rpl19|Rpl27|Rpl28|Rpl32|Rpl37a|Rpl7|Rpl9|Rps14|Rps15|Rps16|Rps17|Rps19|Rps29|Rps3a1|Rps5|Rps6|Rps8|Snu13|Rpl13a|Rpl8|Rps3|Rps11|Rrp9|Imp4|Gnl3|Krr1|Rps28|Nop58|Ftsj3|Ddx21|Pes1|Nip7|Rps23|Rps21|Rpl14|Nop56|Utp11|Rpl39|Rps20|Nob1|Ddx47|Rps27l|Rps13|Rpl34|Ebna1bp2|Wdr43|Utp14a|Nol9|Nop14|Las1l|Rpl18a|Rps9|Ddx52|Rpl10|Rpl31|Rpl13|Rpl5	-51
D4	Reactome Gene Sets	6	R-MMU-8868773	rRNA processing in the nucleus and cytosol		-54	15	28	20504	171	494	61	12	1.5	14113|16785|17975|19899|19921|19942|19943|19951|19981|19989|20005|20044|20054|20055|20068|20085|20090|20091|20103|20104|20116|20826|22121|26961|27050|27207|27966|27993|30877|52705|54127|55989|56095|56200|64934|66164|66475|66481|67115|67134|67205|67248|67427|67619|67755|67941|68052|68436|69072|72515|72554|74035|75416|76130|76808|76846|78394|110954|114641|270106|100503670	Fbl|Rpsa|Ncl|Rpl18|Rpl19|Rpl27|Rpl28|Rpl32|Rpl37a|Rpl7|Rpl9|Rps14|Rps15|Rps16|Rps17|Rps19|Rps29|Rps3a1|Rps5|Rps6|Rps8|Snu13|Rpl13a|Rpl8|Rps3|Rps11|Rrp9|Imp4|Gnl3|Krr1|Rps28|Nop58|Ftsj3|Ddx21|Pes1|Nip7|Rps23|Rps21|Rpl14|Nop56|Utp11|Rpl39|Rps20|Nob1|Ddx47|Rps27l|Rps13|Rpl34|Ebna1bp2|Wdr43|Utp14a|Nol9|Nop14|Las1l|Rpl18a|Rps9|Ddx52|Rpl10|Rpl31|Rpl13|Rpl5	-51
D4	Reactome Gene Sets	6	R-MMU-72689	Formation of a pool of free 40S subunits		-49	20	30	20504	97	494	47	9.5	1.3	13669|16341|16785|19899|19921|19942|19943|19951|19981|19989|20005|20044|20054|20055|20068|20085|20090|20091|20103|20104|20116|22121|26961|27050|27207|27979|53356|54127|54709|55944|56347|66085|66475|66481|67115|67248|67427|67941|68052|68436|76808|76846|110954|114641|223691|270106|100503670	Eif3a|Eif3e|Rpsa|Rpl18|Rpl19|Rpl27|Rpl28|Rpl32|Rpl37a|Rpl7|Rpl9|Rps14|Rps15|Rps16|Rps17|Rps19|Rps29|Rps3a1|Rps5|Rps6|Rps8|Rpl13a|Rpl8|Rps3|Rps11|Eif3b|Eif3g|Rps28|Eif3i|Eif3d|Eif3c|Eif3f|Rps23|Rps21|Rpl14|Rpl39|Rps20|Rps27l|Rps13|Rpl34|Rpl18a|Rps9|Rpl10|Rpl31|Eif3l|Rpl13|Rpl5	-47
D4	Reactome Gene Sets	6	R-MMU-156827	L13a-mediated translational silencing of Ceruloplasmin expression		-48	19	29	20504	107	494	48	9.7	1.3	13669|13681|16341|16785|19899|19921|19942|19943|19951|19981|19989|20005|20044|20054|20055|20068|20085|20090|20091|20103|20104|20116|22121|26961|27050|27207|27979|53356|54127|54709|55944|56347|66085|66475|66481|67115|67248|67427|67941|68052|68436|76808|76846|110954|114641|223691|270106|100503670	Eif3a|Eif4a1|Eif3e|Rpsa|Rpl18|Rpl19|Rpl27|Rpl28|Rpl32|Rpl37a|Rpl7|Rpl9|Rps14|Rps15|Rps16|Rps17|Rps19|Rps29|Rps3a1|Rps5|Rps6|Rps8|Rpl13a|Rpl8|Rps3|Rps11|Eif3b|Eif3g|Rps28|Eif3i|Eif3d|Eif3c|Eif3f|Rps23|Rps21|Rpl14|Rpl39|Rps20|Rps27l|Rps13|Rpl34|Rpl18a|Rps9|Rpl10|Rpl31|Eif3l|Rpl13|Rpl5	-46
D4	Reactome Gene Sets	6	R-MMU-72706	GTP hydrolysis and joining of the 60S ribosomal subunit		-48	18	29	20504	108	494	48	9.7	1.3	13669|13681|16341|16785|19899|19921|19942|19943|19951|19981|19989|20005|20044|20054|20055|20068|20085|20090|20091|20103|20104|20116|22121|26961|27050|27207|27979|53356|54127|54709|55944|56347|66085|66475|66481|67115|67248|67427|67941|68052|68436|76808|76846|110954|114641|223691|270106|100503670	Eif3a|Eif4a1|Eif3e|Rpsa|Rpl18|Rpl19|Rpl27|Rpl28|Rpl32|Rpl37a|Rpl7|Rpl9|Rps14|Rps15|Rps16|Rps17|Rps19|Rps29|Rps3a1|Rps5|Rps6|Rps8|Rpl13a|Rpl8|Rps3|Rps11|Eif3b|Eif3g|Rps28|Eif3i|Eif3d|Eif3c|Eif3f|Rps23|Rps21|Rpl14|Rpl39|Rps20|Rps27l|Rps13|Rpl34|Rpl18a|Rps9|Rpl10|Rpl31|Eif3l|Rpl13|Rpl5	-45
D4	Reactome Gene Sets	6	R-MMU-72613	Eukaryotic Translation Initiation		-48	18	28	20504	115	494	49	9.9	1.3	13669|13681|16341|16785|19899|19921|19942|19943|19951|19981|19989|20005|20044|20054|20055|20068|20085|20090|20091|20103|20104|20116|22121|26961|27050|27207|27979|53356|54127|54709|55944|56347|66085|66475|66481|67115|67248|67427|67941|68052|68436|76808|76846|110954|114641|217715|223691|270106|100503670	Eif3a|Eif4a1|Eif3e|Rpsa|Rpl18|Rpl19|Rpl27|Rpl28|Rpl32|Rpl37a|Rpl7|Rpl9|Rps14|Rps15|Rps16|Rps17|Rps19|Rps29|Rps3a1|Rps5|Rps6|Rps8|Rpl13a|Rpl8|Rps3|Rps11|Eif3b|Eif3g|Rps28|Eif3i|Eif3d|Eif3c|Eif3f|Rps23|Rps21|Rpl14|Rpl39|Rps20|Rps27l|Rps13|Rpl34|Rpl18a|Rps9|Rpl10|Rpl31|Eif2b2|Eif3l|Rpl13|Rpl5	-45
D4	Reactome Gene Sets	6	R-MMU-72737	Cap-dependent Translation Initiation		-48	18	28	20504	115	494	49	9.9	1.3	13669|13681|16341|16785|19899|19921|19942|19943|19951|19981|19989|20005|20044|20054|20055|20068|20085|20090|20091|20103|20104|20116|22121|26961|27050|27207|27979|53356|54127|54709|55944|56347|66085|66475|66481|67115|67248|67427|67941|68052|68436|76808|76846|110954|114641|217715|223691|270106|100503670	Eif3a|Eif4a1|Eif3e|Rpsa|Rpl18|Rpl19|Rpl27|Rpl28|Rpl32|Rpl37a|Rpl7|Rpl9|Rps14|Rps15|Rps16|Rps17|Rps19|Rps29|Rps3a1|Rps5|Rps6|Rps8|Rpl13a|Rpl8|Rps3|Rps11|Eif3b|Eif3g|Rps28|Eif3i|Eif3d|Eif3c|Eif3f|Rps23|Rps21|Rpl14|Rpl39|Rps20|Rps27l|Rps13|Rpl34|Rpl18a|Rps9|Rpl10|Rpl31|Eif2b2|Eif3l|Rpl13|Rpl5	-45
D4	GO Biological Processes	19	GO:0006364	rRNA processing	19_GO:0008152 metabolic process	-47	12	25	20504	214	494	61	12	1.5	14113|16418|17975|18114|18150|19942|19989|20044|20054|20055|20068|20085|20104|20116|20826|27966|27993|52513|52705|54127|56095|56200|59050|64934|66229|66254|66481|66942|67040|67115|67205|67459|67619|67755|67920|67949|68077|68966|69072|69237|69663|69902|70285|70683|71990|72515|72554|74035|75416|76130|78394|98956|100019|107071|107094|110109|217431|227656|228889|235036|100503670	Fbl|Eif6|Ncl|Rrp1|Npm3|Rpl27|Rpl7|Rps14|Rps15|Rps16|Rps17|Rps19|Rps6|Rps8|Snu13|Rrp9|Imp4|Ddx56|Krr1|Rps28|Ftsj3|Ddx21|Nsa2|Pes1|Rpl7l1|Dimt1|Rps21|Ddx18|Ddx17|Rpl14|Utp11|Nvl|Nob1|Ddx47|Mak16|Nifk|Nop53|Ngdn|Ebna1bp2|Gtpbp4|Ddx51|Mrto4|Rpf1|Utp20|Ddx54|Wdr43|Utp14a|Nol9|Nop14|Las1l|Ddx52|Nat10|Mdn1|Wdr74|Rrp12|Nop2|Nol10|Rexo4|Ddx27|Ppan|Rpl5	-45
D4	GO Biological Processes	19	GO:0016072	rRNA metabolic process	19_GO:0008152 metabolic process	-46	11	24	20504	224	494	61	12	1.5	14113|16418|17975|18114|18150|19942|19989|20044|20054|20055|20068|20085|20104|20116|20826|27966|27993|52513|52705|54127|56095|56200|59050|64934|66229|66254|66481|66942|67040|67115|67205|67459|67619|67755|67920|67949|68077|68966|69072|69237|69663|69902|70285|70683|71990|72515|72554|74035|75416|76130|78394|98956|100019|107071|107094|110109|217431|227656|228889|235036|100503670	Fbl|Eif6|Ncl|Rrp1|Npm3|Rpl27|Rpl7|Rps14|Rps15|Rps16|Rps17|Rps19|Rps6|Rps8|Snu13|Rrp9|Imp4|Ddx56|Krr1|Rps28|Ftsj3|Ddx21|Nsa2|Pes1|Rpl7l1|Dimt1|Rps21|Ddx18|Ddx17|Rpl14|Utp11|Nvl|Nob1|Ddx47|Mak16|Nifk|Nop53|Ngdn|Ebna1bp2|Gtpbp4|Ddx51|Mrto4|Rpf1|Utp20|Ddx54|Wdr43|Utp14a|Nol9|Nop14|Las1l|Ddx52|Nat10|Mdn1|Wdr74|Rrp12|Nop2|Nol10|Rexo4|Ddx27|Ppan|Rpl5	-43
D4	WikiPathways	27	WP310	mRNA processing		-44	7.2	21	20504	453	494	79	16	1.6	11739|11991|13204|13205|14105|14113|14265|15381|15382|15384|15388|15469|16201|17184|17975|19205|19383|19655|19656|19921|19951|19989|20005|20044|20090|20104|20462|20624|20637|20826|22608|24061|26961|27041|27207|27225|27979|27993|50926|51796|52513|52874|53319|53356|53379|53610|54127|56195|56200|57320|66164|66475|66645|66660|67248|67427|67920|67949|68052|68479|68981|70052|70767|71514|71713|74326|765…	Slc25a4|Hnrnpd|Dhx15|Ddx3x|Srsf10|Fbl|Fmr1|Hnrnpc|Hnrnpa1|Hnrnpab|Hnrnpl|Prmt1|Ilf3|Matr3|Ncl|Ptbp1|Raly|Rbmx|Rbmxl1|Rpl19|Rpl32|Rpl7|Rpl9|Rps14|Rps29|Rps6|Tra2b|Eftud2|Snrnp70|Snu13|Ybx1|Smc1a|Rpl8|G3bp1|Rps11|Ddx24|Eif3b|Imp4|Hnrnpdl|Srrm1|Ddx56|Pum3|Nxf1|Eif3g|Hnrnpa2b1|Nono|Rps28|Ptbp2|Ddx21|Park7|Nip7|Rps23|Pspc1|Sltm|Rpl39|Rps20|Mak16|Nifk|Rps13|Phf5a|Snrpa1|Prpf4|Prpf3|Sfpq|Cdc40|Hnrnpr|Rb…	-42
D4	GO Biological Processes	19	GO:0034470	ncRNA processing	19_GO:0008152 metabolic process	-42	8	21	20504	362	494	70	14	1.6	13205|14113|16418|17975|18114|18150|19942|19989|20044|20054|20055|20068|20085|20104|20116|20826|27966|27993|28036|52513|52705|53379|54127|56095|56200|59050|64934|66229|66254|66481|66942|67040|67115|67205|67459|67619|67724|67755|67920|67949|68077|68510|68966|69072|69237|69663|69902|70285|70683|71990|72515|72554|74035|74195|75416|76130|78394|83701|98956|100019|107071|107094|110109|217431|227656|228…	Ddx3x|Fbl|Eif6|Ncl|Rrp1|Npm3|Rpl27|Rpl7|Rps14|Rps15|Rps16|Rps17|Rps19|Rps6|Rps8|Snu13|Rrp9|Imp4|Larp7|Ddx56|Krr1|Hnrnpa2b1|Rps28|Ftsj3|Ddx21|Nsa2|Pes1|Rpl7l1|Dimt1|Rps21|Ddx18|Ddx17|Rpl14|Utp11|Nvl|Nob1|Pop1|Ddx47|Mak16|Nifk|Nop53|Ints1|Ngdn|Ebna1bp2|Gtpbp4|Ddx51|Mrto4|Rpf1|Utp20|Ddx54|Wdr43|Utp14a|Nol9|Elp3|Nop14|Las1l|Ddx52|Srrt|Nat10|Mdn1|Wdr74|Rrp12|Nop2|Nol10|Rexo4|Ddx27|Elp1|Aars|Ppan|Rpl5	-40
D4	CORUM	33	CORUM:3047	Parvulin-associated pre-rRNP complex		-41	27	29	20504	50	494	33	6.7	1.1	14113|14268|17975|18114|18432|19899|19921|19989|20091|20104|20116|22121|26961|27050|27225|52513|55989|56095|56200|64934|66942|67115|67134|67949|69072|69237|69902|76808|110109|228889|230737|270106|100503670	Fbl|Fn1|Ncl|Rrp1|Mybbp1a|Rpl18|Rpl19|Rpl7|Rps3a1|Rps6|Rps8|Rpl13a|Rpl8|Rps3|Ddx24|Ddx56|Nop58|Ftsj3|Ddx21|Pes1|Ddx18|Rpl14|Nop56|Nifk|Ebna1bp2|Gtpbp4|Mrto4|Rpl18a|Nop2|Ddx27|Gnl2|Rpl13|Rpl5	-38
D4	GO Biological Processes	19	GO:0006412	translation	19_GO:0008152 metabolic process	-41	5.5	19	20504	677	494	90	18	1.7	11991|12785|13205|13627|13629|13669|13681|14265|14433|14694|15388|16201|16210|16341|16418|16549|16785|17454|17975|18746|19899|19921|19943|19951|19981|19989|20005|20042|20044|20054|20055|20068|20085|20090|20091|20103|20116|20218|20430|21453|22121|22352|24015|26961|27050|27207|27979|52874|53356|53872|54127|54217|54709|55944|56347|66085|66475|66481|67115|67248|67427|67941|68052|68134|68966|69527|702…	Hnrnpd|Cnbp|Ddx3x|Eef1a1|Eef2|Eif3a|Eif4a1|Fmr1|Gapdh|Rack1|Hnrnpl|Ilf3|Impact|Eif3e|Eif6|Khsrp|Rpsa|Mov10|Ncl|Pkm|Rpl18|Rpl19|Rpl28|Rpl32|Rpl37a|Rpl7|Rpl9|Rps12|Rps14|Rps15|Rps16|Rps17|Rps19|Rps29|Rps3a1|Rps5|Rps8|Khdrbs1|Cyfip1|Tcof1|Rpl13a|Vim|Abce1|Rpl8|Rps3|Rps11|Eif3b|Pum3|Eif3g|Caprin1|Rps28|Rpl36|Eif3i|Eif3d|Eif3c|Eif3f|Rps23|Rps21|Rpl14|Rpl39|Rps20|Rps27l|Rps13|Upf3b|Ngdn|Mrps9|Nars|Lrpp…	-38
D4	GO Biological Processes	19	GO:0043043	peptide biosynthetic process	19_GO:0008152 metabolic process	-39	5.3	18	20504	701	494	90	18	1.7	11991|12785|13205|13627|13629|13669|13681|14265|14433|14694|15388|16201|16210|16341|16418|16549|16785|17454|17975|18746|19899|19921|19943|19951|19981|19989|20005|20042|20044|20054|20055|20068|20085|20090|20091|20103|20116|20218|20430|21453|22121|22352|24015|26961|27050|27207|27979|52874|53356|53872|54127|54217|54709|55944|56347|66085|66475|66481|67115|67248|67427|67941|68052|68134|68966|69527|702…	Hnrnpd|Cnbp|Ddx3x|Eef1a1|Eef2|Eif3a|Eif4a1|Fmr1|Gapdh|Rack1|Hnrnpl|Ilf3|Impact|Eif3e|Eif6|Khsrp|Rpsa|Mov10|Ncl|Pkm|Rpl18|Rpl19|Rpl28|Rpl32|Rpl37a|Rpl7|Rpl9|Rps12|Rps14|Rps15|Rps16|Rps17|Rps19|Rps29|Rps3a1|Rps5|Rps8|Khdrbs1|Cyfip1|Tcof1|Rpl13a|Vim|Abce1|Rpl8|Rps3|Rps11|Eif3b|Pum3|Eif3g|Caprin1|Rps28|Rpl36|Eif3i|Eif3d|Eif3c|Eif3f|Rps23|Rps21|Rpl14|Rpl39|Rps20|Rps27l|Rps13|Upf3b|Ngdn|Mrps9|Nars|Lrpp…	-37
D4	GO Biological Processes	19	GO:0034660	ncRNA metabolic process	19_GO:0008152 metabolic process	-39	6.7	19	20504	456	494	74	15	1.6	13205|14113|16418|16549|17975|18114|18150|19942|19989|20044|20054|20055|20068|20085|20104|20116|20826|27966|27993|28036|52513|52705|53379|54127|56095|56200|59050|64934|66229|66254|66481|66942|67040|67115|67205|67459|67619|67724|67755|67920|67949|68077|68510|68966|69072|69237|69663|69902|70223|70285|70683|71990|72515|72554|74035|74195|75416|76130|78394|83701|98956|100019|107071|107094|107271|11010…	Ddx3x|Fbl|Eif6|Khsrp|Ncl|Rrp1|Npm3|Rpl27|Rpl7|Rps14|Rps15|Rps16|Rps17|Rps19|Rps6|Rps8|Snu13|Rrp9|Imp4|Larp7|Ddx56|Krr1|Hnrnpa2b1|Rps28|Ftsj3|Ddx21|Nsa2|Pes1|Rpl7l1|Dimt1|Rps21|Ddx18|Ddx17|Rpl14|Utp11|Nvl|Nob1|Pop1|Ddx47|Mak16|Nifk|Nop53|Ints1|Ngdn|Ebna1bp2|Gtpbp4|Ddx51|Mrto4|Nars|Rpf1|Utp20|Ddx54|Wdr43|Utp14a|Nol9|Elp3|Nop14|Las1l|Ddx52|Srrt|Nat10|Mdn1|Wdr74|Rrp12|Yars|Nop2|Nol10|Dars|Rexo4|Ddx27…	-37
D4	Reactome Gene Sets	6	R-MMU-975956	Nonsense Mediated Decay (NMD) independent of the Exon Junction Complex (EJC)		-39	18	25	20504	90	494	39	7.9	1.2	16785|19899|19921|19942|19943|19951|19981|19989|20005|20044|20054|20055|20068|20085|20090|20091|20103|20104|20116|22121|26961|27050|27207|54127|66475|66481|67115|67248|67427|67941|68052|68436|76808|76846|110954|114641|225363|270106|100503670	Rpsa|Rpl18|Rpl19|Rpl27|Rpl28|Rpl32|Rpl37a|Rpl7|Rpl9|Rps14|Rps15|Rps16|Rps17|Rps19|Rps29|Rps3a1|Rps5|Rps6|Rps8|Rpl13a|Rpl8|Rps3|Rps11|Rps28|Rps23|Rps21|Rpl14|Rpl39|Rps20|Rps27l|Rps13|Rpl34|Rpl18a|Rps9|Rpl10|Rpl31|Etf1|Rpl13|Rpl5	-36
D4	GO Molecular Functions	21	GO:0005198	structural molecule activity		-39	5.8	19	20504	585	494	82	17	1.7	12757|12814|12818|12819|12822|12824|12825|12826|12827|12831|12832|12833|12834|12835|12842|12843|13008|14118|14119|14268|15530|16785|17304|17904|18074|19899|19921|19942|19943|19951|19981|19989|20005|20042|20044|20054|20055|20068|20085|20090|20091|20103|20104|20116|22121|22145|22152|22352|26961|27050|27207|54127|54217|59015|59042|66229|66395|66475|66481|67115|67248|67300|67427|67941|67951|68052|684…	Clta|Col11a1|Col14a1|Col15a1|Col18a1|Col2a1|Col3a1|Col4a1|Col4a2|Col5a1|Col5a2|Col6a1|Col6a2|Col6a3|Col1a1|Col1a2|Csrp2|Fbn1|Fbn2|Fn1|Hspg2|Rpsa|Mfge8|Myl6|Nid2|Rpl18|Rpl19|Rpl27|Rpl28|Rpl32|Rpl37a|Rpl7|Rpl9|Rps12|Rps14|Rps15|Rps16|Rps17|Rps19|Rps29|Rps3a1|Rps5|Rps6|Rps8|Rpl13a|Tuba4a|Tubb3|Vim|Rpl8|Rps3|Rps11|Rps28|Rpl36|Nup160|Cope|Rpl7l1|Ahnak|Rps23|Rps21|Rpl14|Rpl39|Cltc|Rps20|Rps27l|Tubb6|Rp…	-36
D4	Reactome Gene Sets	6	R-MMU-72766	Translation		-38	10	22	20504	220	494	54	11	1.4	13627|13629|13669|13681|16341|16785|19899|19921|19942|19943|19951|19981|19989|20005|20044|20054|20055|20068|20085|20090|20091|20103|20104|20116|22121|26961|27050|27207|27979|53356|54127|54709|55944|56347|66085|66475|66481|67115|67248|67427|67941|68052|68436|69527|76808|76846|110954|114641|217715|223691|225363|232536|270106|100503670	Eef1a1|Eef2|Eif3a|Eif4a1|Eif3e|Rpsa|Rpl18|Rpl19|Rpl27|Rpl28|Rpl32|Rpl37a|Rpl7|Rpl9|Rps14|Rps15|Rps16|Rps17|Rps19|Rps29|Rps3a1|Rps5|Rps6|Rps8|Rpl13a|Rpl8|Rps3|Rps11|Eif3b|Eif3g|Rps28|Eif3i|Eif3d|Eif3c|Eif3f|Rps23|Rps21|Rpl14|Rpl39|Rps20|Rps27l|Rps13|Rpl34|Mrps9|Rpl18a|Rps9|Rpl10|Rpl31|Eif2b2|Eif3l|Etf1|Mrps35|Rpl13|Rpl5	-36
D4	Reactome Gene Sets	6	R-MMU-1799339	SRP-dependent cotranslational protein targeting to membrane		-38	18	25	20504	88	494	38	7.7	1.2	16785|19899|19921|19942|19943|19951|19981|19989|20005|20044|20054|20055|20068|20085|20090|20091|20103|20104|20116|22121|26961|27050|27207|54127|66475|66481|67115|67248|67427|67941|68052|68436|76808|76846|110954|114641|270106|100503670	Rpsa|Rpl18|Rpl19|Rpl27|Rpl28|Rpl32|Rpl37a|Rpl7|Rpl9|Rps14|Rps15|Rps16|Rps17|Rps19|Rps29|Rps3a1|Rps5|Rps6|Rps8|Rpl13a|Rpl8|Rps3|Rps11|Rps28|Rps23|Rps21|Rpl14|Rpl39|Rps20|Rps27l|Rps13|Rpl34|Rpl18a|Rps9|Rpl10|Rpl31|Rpl13|Rpl5	-35
D4	Reactome Gene Sets	6	R-MMU-927802	Nonsense-Mediated Decay (NMD)		-37	15	24	20504	110	494	41	8.3	1.2	16785|19899|19921|19942|19943|19951|19981|19989|20005|20044|20054|20055|20068|20085|20090|20091|20103|20104|20116|22121|26961|27050|27207|51792|54127|66475|66481|67115|67248|67427|67941|68052|68134|68436|76808|76846|110954|114641|225363|270106|100503670	Rpsa|Rpl18|Rpl19|Rpl27|Rpl28|Rpl32|Rpl37a|Rpl7|Rpl9|Rps14|Rps15|Rps16|Rps17|Rps19|Rps29|Rps3a1|Rps5|Rps6|Rps8|Rpl13a|Rpl8|Rps3|Rps11|Ppp2r1a|Rps28|Rps23|Rps21|Rpl14|Rpl39|Rps20|Rps27l|Rps13|Upf3b|Rpl34|Rpl18a|Rps9|Rpl10|Rpl31|Etf1|Rpl13|Rpl5	-35
D4	Reactome Gene Sets	6	R-MMU-975957	Nonsense Mediated Decay (NMD) enhanced by the Exon Junction Complex (EJC)		-37	15	24	20504	110	494	41	8.3	1.2	16785|19899|19921|19942|19943|19951|19981|19989|20005|20044|20054|20055|20068|20085|20090|20091|20103|20104|20116|22121|26961|27050|27207|51792|54127|66475|66481|67115|67248|67427|67941|68052|68134|68436|76808|76846|110954|114641|225363|270106|100503670	Rpsa|Rpl18|Rpl19|Rpl27|Rpl28|Rpl32|Rpl37a|Rpl7|Rpl9|Rps14|Rps15|Rps16|Rps17|Rps19|Rps29|Rps3a1|Rps5|Rps6|Rps8|Rpl13a|Rpl8|Rps3|Rps11|Ppp2r1a|Rps28|Rps23|Rps21|Rpl14|Rpl39|Rps20|Rps27l|Rps13|Upf3b|Rpl34|Rpl18a|Rps9|Rpl10|Rpl31|Etf1|Rpl13|Rpl5	-35
D4	Reactome Gene Sets	6	R-MMU-72695	Formation of the ternary complex, and subsequently, the 43S complex		-34	24	26	20504	50	494	29	5.9	1.1	13669|16341|16785|20044|20054|20055|20068|20085|20090|20091|20103|20104|20116|27050|27207|27979|53356|54127|54709|55944|56347|66085|66475|66481|67427|67941|68052|76846|223691	Eif3a|Eif3e|Rpsa|Rps14|Rps15|Rps16|Rps17|Rps19|Rps29|Rps3a1|Rps5|Rps6|Rps8|Rps3|Rps11|Eif3b|Eif3g|Rps28|Eif3i|Eif3d|Eif3c|Eif3f|Rps23|Rps21|Rps20|Rps27l|Rps13|Rps9|Eif3l	-31
D4	WikiPathways	27	WP163	Cytoplasmic ribosomal proteins		-33	16	23	20504	95	494	36	7.3	1.2	16785|19899|19921|19942|19943|19951|19981|19989|20005|20042|20044|20054|20055|20068|20085|20090|20091|20103|20104|20116|22121|26961|27050|27207|54127|54217|66475|66481|67248|67427|68052|68436|76808|110954|114641|270106	Rpsa|Rpl18|Rpl19|Rpl27|Rpl28|Rpl32|Rpl37a|Rpl7|Rpl9|Rps12|Rps14|Rps15|Rps16|Rps17|Rps19|Rps29|Rps3a1|Rps5|Rps6|Rps8|Rpl13a|Rpl8|Rps3|Rps11|Rps28|Rpl36|Rps23|Rps21|Rpl39|Rps20|Rps13|Rpl34|Rpl18a|Rpl10|Rpl31|Rpl13	-31
D4	Reactome Gene Sets	6	R-MMU-72649	Translation initiation complex formation		-33	22	25	20504	57	494	30	6.1	1.1	13669|13681|16341|16785|20044|20054|20055|20068|20085|20090|20091|20103|20104|20116|27050|27207|27979|53356|54127|54709|55944|56347|66085|66475|66481|67427|67941|68052|76846|223691	Eif3a|Eif4a1|Eif3e|Rpsa|Rps14|Rps15|Rps16|Rps17|Rps19|Rps29|Rps3a1|Rps5|Rps6|Rps8|Rps3|Rps11|Eif3b|Eif3g|Rps28|Eif3i|Eif3d|Eif3c|Eif3f|Rps23|Rps21|Rps20|Rps27l|Rps13|Rps9|Eif3l	-31
D4	Reactome Gene Sets	6	R-MMU-72702	Ribosomal scanning and start codon recognition		-33	22	25	20504	57	494	30	6.1	1.1	13669|13681|16341|16785|20044|20054|20055|20068|20085|20090|20091|20103|20104|20116|27050|27207|27979|53356|54127|54709|55944|56347|66085|66475|66481|67427|67941|68052|76846|223691	Eif3a|Eif4a1|Eif3e|Rpsa|Rps14|Rps15|Rps16|Rps17|Rps19|Rps29|Rps3a1|Rps5|Rps6|Rps8|Rps3|Rps11|Eif3b|Eif3g|Rps28|Eif3i|Eif3d|Eif3c|Eif3f|Rps23|Rps21|Rps20|Rps27l|Rps13|Rps9|Eif3l	-31
D4	Reactome Gene Sets	6	R-MMU-72662	Activation of the mRNA upon binding of the cap-binding complex and eIFs, and subsequent binding to 43S		-33	21	25	20504	58	494	30	6.1	1.1	13669|13681|16341|16785|20044|20054|20055|20068|20085|20090|20091|20103|20104|20116|27050|27207|27979|53356|54127|54709|55944|56347|66085|66475|66481|67427|67941|68052|76846|223691	Eif3a|Eif4a1|Eif3e|Rpsa|Rps14|Rps15|Rps16|Rps17|Rps19|Rps29|Rps3a1|Rps5|Rps6|Rps8|Rps3|Rps11|Eif3b|Eif3g|Rps28|Eif3i|Eif3d|Eif3c|Eif3f|Rps23|Rps21|Rps20|Rps27l|Rps13|Rps9|Eif3l	-30
D4	GO Molecular Functions	21	GO:0003735	structural constituent of ribosome		-31	11	20	20504	166	494	43	8.7	1.3	16785|19899|19921|19942|19943|19951|19981|19989|20005|20042|20044|20054|20055|20068|20085|20090|20091|20103|20104|20116|22121|26961|27050|27207|54127|54217|66229|66475|66481|67115|67248|67427|67941|68052|68436|69527|76808|76846|110954|114641|232536|270106|100503670	Rpsa|Rpl18|Rpl19|Rpl27|Rpl28|Rpl32|Rpl37a|Rpl7|Rpl9|Rps12|Rps14|Rps15|Rps16|Rps17|Rps19|Rps29|Rps3a1|Rps5|Rps6|Rps8|Rpl13a|Rpl8|Rps3|Rps11|Rps28|Rpl36|Rpl7l1|Rps23|Rps21|Rpl14|Rpl39|Rps20|Rps27l|Rps13|Rpl34|Mrps9|Rpl18a|Rps9|Rpl10|Rpl31|Mrps35|Rpl13|Rpl5	-29
D4	GO Molecular Functions	21	GO:0003729	mRNA binding		-29	6.5	17	20504	366	494	57	12	1.4	11834|11991|12465|12785|13205|13361|13627|13669|14265|15381|15382|15388|16201|16549|17975|18746|19205|19655|19989|20044|20091|20103|20218|20462|20637|22121|22608|23881|27041|27050|30877|52874|53319|53379|55944|56195|56449|57320|66511|68052|68134|71713|74326|75956|77579|81898|108037|110809|140486|140488|216766|225363|229279|231386|233908|331401|100503670	Aqr|Hnrnpd|Cct5|Cnbp|Ddx3x|Dhfr|Eef1a1|Eif3a|Fmr1|Hnrnpc|Hnrnpa1|Hnrnpl|Ilf3|Khsrp|Ncl|Pkm|Ptbp1|Rbmx|Rpl7|Rps14|Rps3a1|Rps5|Khdrbs1|Tra2b|Snrnp70|Rpl13a|Ybx1|G3bp2|G3bp1|Rps3|Gnl3|Pum3|Nxf1|Hnrnpa2b1|Eif3d|Ptbp2|Ybx3|Park7|Chtop|Rps13|Upf3b|Cdc40|Hnrnpr|Srrm2|Myh10|Sf3b1|Shmt2|Srsf1|Igf2bp1|Igf2bp3|Gemin5|Etf1|Hnrnpa3|Ythdc1|Fus|Thoc2|Rpl5	-27
D4	KEGG Pathway	24	ko03010	Ribosome		-28	9.8	18	20504	174	494	41	8.3	1.2	16785|19899|19921|19942|19943|19951|19981|19989|20005|20042|20044|20054|20055|20068|20085|20090|20091|20103|20104|20116|22121|26961|27050|27207|54127|54217|66475|66481|67115|67248|67427|67941|68052|68436|69527|76808|76846|110954|114641|270106|100503670	Rpsa|Rpl18|Rpl19|Rpl27|Rpl28|Rpl32|Rpl37a|Rpl7|Rpl9|Rps12|Rps14|Rps15|Rps16|Rps17|Rps19|Rps29|Rps3a1|Rps5|Rps6|Rps8|Rpl13a|Rpl8|Rps3|Rps11|Rps28|Rpl36|Rps23|Rps21|Rpl14|Rpl39|Rps20|Rps27l|Rps13|Rpl34|Mrps9|Rpl18a|Rps9|Rpl10|Rpl31|Rpl13|Rpl5	-26
D4	KEGG Pathway	24	mmu03010	Ribosome		-28	9.7	18	20504	175	494	41	8.3	1.2	16785|19899|19921|19942|19943|19951|19981|19989|20005|20042|20044|20054|20055|20068|20085|20090|20091|20103|20104|20116|22121|26961|27050|27207|54127|54217|66475|66481|67115|67248|67427|67941|68052|68436|69527|76808|76846|110954|114641|270106|100503670	Rpsa|Rpl18|Rpl19|Rpl27|Rpl28|Rpl32|Rpl37a|Rpl7|Rpl9|Rps12|Rps14|Rps15|Rps16|Rps17|Rps19|Rps29|Rps3a1|Rps5|Rps6|Rps8|Rpl13a|Rpl8|Rps3|Rps11|Rps28|Rpl36|Rps23|Rps21|Rpl14|Rpl39|Rps20|Rps27l|Rps13|Rpl34|Mrps9|Rpl18a|Rps9|Rpl10|Rpl31|Rpl13|Rpl5	-26
D4	GO Biological Processes	19	GO:0008380	RNA splicing	19_GO:0008152 metabolic process	-28	6	16	20504	399	494	58	12	1.4	11834|13204|14105|14265|15381|15382|15388|15469|16549|17975|19205|19383|19655|19656|20218|20462|20624|20637|20826|22608|24010|28000|28036|51796|53379|53610|56195|66395|67040|67302|67755|68052|68183|68479|68981|68988|70052|70767|71514|71713|74351|75956|76572|81898|101214|101739|108014|110809|170791|192159|216766|225027|229279|231386|233908|320632|331401|432467	Aqr|Dhx15|Srsf10|Fmr1|Hnrnpc|Hnrnpa1|Hnrnpl|Prmt1|Khsrp|Ncl|Ptbp1|Raly|Rbmx|Rbmxl1|Khdrbs1|Tra2b|Eftud2|Snrnp70|Snu13|Ybx1|Ik|Prpf19|Larp7|Srrm1|Hnrnpa2b1|Nono|Ptbp2|Ahnak|Ddx17|Zc3h13|Ddx47|Rps13|Bcas2|Phf5a|Snrpa1|Prpf31|Prpf4|Prpf3|Sfpq|Cdc40|Ddx23|Srrm2|Rbmxl2|Sf3b1|Tra2a|Psip1|Srsf9|Srsf1|Rbm39|Prpf8|Gemin5|Srsf7|Hnrnpa3|Ythdc1|Fus|Snrnp200|Thoc2|Hnrnph3	-26
D4	GO Biological Processes	19	GO:0042273	ribosomal large subunit biogenesis	19_GO:0009987 cellular process	-28	17	21	20504	72	494	29	5.9	1.1	16418|19989|20826|20935|28126|56095|59050|64934|66164|66229|66942|67115|67459|67920|67949|68077|69072|69237|69902|70285|74035|76130|100019|107071|110109|110954|231452|235036|100503670	Eif6|Rpl7|Snu13|Surf6|Nop16|Ftsj3|Nsa2|Pes1|Nip7|Rpl7l1|Ddx18|Rpl14|Nvl|Mak16|Nifk|Nop53|Ebna1bp2|Gtpbp4|Mrto4|Rpf1|Nol9|Las1l|Mdn1|Wdr74|Nop2|Rpl10|Sdad1|Ppan|Rpl5	-25
D4	GO Biological Processes	19	GO:0016071	mRNA metabolic process	19_GO:0008152 metabolic process	-25	4.3	14	20504	675	494	70	14	1.6	11834|11991|13204|14105|14265|15381|15382|15388|16341|16549|17454|17975|19205|19383|19655|19656|20218|20462|20624|20637|20826|22352|22608|24010|28000|28036|50926|51796|53379|53610|56195|66660|67040|67302|67755|68134|68183|68479|68981|68988|69902|70052|70767|71514|71713|74326|74351|75956|76572|81898|83701|101214|101739|108014|110809|140486|170791|192159|192176|216766|224902|224903|225027|225363|22…	Aqr|Hnrnpd|Dhx15|Srsf10|Fmr1|Hnrnpc|Hnrnpa1|Hnrnpl|Eif3e|Khsrp|Mov10|Ncl|Ptbp1|Raly|Rbmx|Rbmxl1|Khdrbs1|Tra2b|Eftud2|Snrnp70|Snu13|Vim|Ybx1|Ik|Prpf19|Larp7|Hnrnpdl|Srrm1|Hnrnpa2b1|Nono|Ptbp2|Sltm|Ddx17|Zc3h13|Ddx47|Upf3b|Bcas2|Phf5a|Snrpa1|Prpf31|Mrto4|Prpf4|Prpf3|Sfpq|Cdc40|Hnrnpr|Ddx23|Srrm2|Rbmxl2|Sf3b1|Srrt|Tra2a|Psip1|Srsf9|Srsf1|Igf2bp1|Rbm39|Prpf8|Flna|Gemin5|Safb2|Safb|Srsf7|Etf1|Hnrnpa3|…	-22
D4	Reactome Gene Sets	6	R-MMU-72203	Processing of Capped Intron-Containing Pre-mRNA		-24	7.6	16	20504	229	494	42	8.5	1.3	11834|11991|13204|14105|15381|15382|15388|19655|20462|20624|20637|20826|22608|28000|51796|53319|53379|59015|66511|68134|68183|68479|68981|68988|70052|70767|71713|71805|74326|74351|75956|83701|108014|110809|170762|192159|225027|229279|231329|233908|320632|331401	Aqr|Hnrnpd|Dhx15|Srsf10|Hnrnpc|Hnrnpa1|Hnrnpl|Rbmx|Tra2b|Eftud2|Snrnp70|Snu13|Ybx1|Prpf19|Srrm1|Nxf1|Hnrnpa2b1|Nup160|Chtop|Upf3b|Bcas2|Phf5a|Snrpa1|Prpf31|Prpf4|Prpf3|Cdc40|Nup93|Hnrnpr|Ddx23|Srrm2|Srrt|Srsf9|Srsf1|Nup155|Prpf8|Srsf7|Hnrnpa3|Polr2b|Fus|Snrnp200|Thoc2	-22
D4	GO Biological Processes	19	GO:0006397	mRNA processing	19_GO:0008152 metabolic process	-24	5.1	14	20504	470	494	58	12	1.4	11834|13204|14105|14265|15381|15382|15388|16549|17975|19205|19383|19655|19656|20218|20462|20624|20637|20826|22608|24010|28000|28036|51796|53379|53610|56195|66660|67040|67302|67755|68183|68479|68981|68988|70052|70767|71514|71713|74351|75956|76572|81898|83701|101214|101739|108014|110809|170791|192159|216766|224902|224903|225027|229279|231386|268697|320632|331401	Aqr|Dhx15|Srsf10|Fmr1|Hnrnpc|Hnrnpa1|Hnrnpl|Khsrp|Ncl|Ptbp1|Raly|Rbmx|Rbmxl1|Khdrbs1|Tra2b|Eftud2|Snrnp70|Snu13|Ybx1|Ik|Prpf19|Larp7|Srrm1|Hnrnpa2b1|Nono|Ptbp2|Sltm|Ddx17|Zc3h13|Ddx47|Bcas2|Phf5a|Snrpa1|Prpf31|Prpf4|Prpf3|Sfpq|Cdc40|Ddx23|Srrm2|Rbmxl2|Sf3b1|Srrt|Tra2a|Psip1|Srsf9|Srsf1|Rbm39|Prpf8|Gemin5|Safb2|Safb|Srsf7|Hnrnpa3|Ythdc1|Ccnb1|Snrnp200|Thoc2	-22
D4	Reactome Gene Sets	6	R-MMU-72163	mRNA Splicing - Major Pathway		-23	8.7	16	20504	172	494	36	7.3	1.2	11834|11991|13204|14105|15381|15382|15388|19655|20462|20624|20637|20826|22608|28000|51796|53379|68134|68183|68479|68981|68988|70052|70767|71713|74326|74351|75956|83701|108014|110809|192159|225027|229279|231329|233908|320632	Aqr|Hnrnpd|Dhx15|Srsf10|Hnrnpc|Hnrnpa1|Hnrnpl|Rbmx|Tra2b|Eftud2|Snrnp70|Snu13|Ybx1|Prpf19|Srrm1|Hnrnpa2b1|Upf3b|Bcas2|Phf5a|Snrpa1|Prpf31|Prpf4|Prpf3|Cdc40|Hnrnpr|Ddx23|Srrm2|Srrt|Srsf9|Srsf1|Prpf8|Srsf7|Hnrnpa3|Polr2b|Fus|Snrnp200	-21
D4	GO Molecular Functions	21	GO:0140657	ATP-dependent activity		-23	4.6	13	20504	541	494	60	12	1.5	11834|11938|11947|12462|12464|12465|12466|12572|13006|13204|13205|13681|14211|14375|14828|15516|15526|15528|16551|16952|17215|17216|17218|17220|17454|17688|17886|19179|19687|19718|20586|21454|21973|22596|24015|24061|27041|27225|52513|56200|66942|67040|67089|67459|67755|69263|69663|69716|70099|71819|71990|74351|77579|78394|93762|106344|107932|224742|228889|320632	Aqr|Atp2a2|Atp5b|Cct3|Cct4|Cct5|Cct6a|Cdk7|Smc3|Dhx15|Ddx3x|Eif4a1|Smc2|Xrcc6|Hspa5|Hsp90ab1|Hspa9|Hspe1|Kif11|Anxa1|Mcm3|Mcm2|Mcm5|Mcm7|Mov10|Msh6|Myh9|Psmc1|Rfc1|Rfc2|Smarca4|Tcp1|Top2a|Xrcc5|Abce1|Smc1a|G3bp1|Ddx24|Ddx56|Ddx21|Ddx18|Ddx17|Psmc6|Nvl|Ddx47|Rfc3|Ddx51|Trip13|Smc4|Kif23|Ddx54|Ddx23|Myh10|Ddx52|Smarca5|Rfc4|Chd4|Abcf1|Ddx27|Snrnp200	-21
D4	Reactome Gene Sets	6	R-MMU-72172	mRNA Splicing		-22	8.4	16	20504	178	494	36	7.3	1.2	11834|11991|13204|14105|15381|15382|15388|19655|20462|20624|20637|20826|22608|28000|51796|53379|68134|68183|68479|68981|68988|70052|70767|71713|74326|74351|75956|83701|108014|110809|192159|225027|229279|231329|233908|320632	Aqr|Hnrnpd|Dhx15|Srsf10|Hnrnpc|Hnrnpa1|Hnrnpl|Rbmx|Tra2b|Eftud2|Snrnp70|Snu13|Ybx1|Prpf19|Srrm1|Hnrnpa2b1|Upf3b|Bcas2|Phf5a|Snrpa1|Prpf31|Prpf4|Prpf3|Cdc40|Hnrnpr|Ddx23|Srrm2|Srrt|Srsf9|Srsf1|Prpf8|Srsf7|Hnrnpa3|Polr2b|Fus|Snrnp200	-20
D4	GO Biological Processes	19	GO:0022618	ribonucleoprotein complex assembly	19_GO:0009987 cellular process	-22	8.5	15	20504	171	494	35	7.1	1.2	13669|14105|15516|16418|16785|19655|20044|20054|20085|20103|20826|22121|22596|28000|54127|55944|56195|67941|68077|68988|69902|70767|75786|81898|100019|101739|110109|110809|110954|192159|216766|231386|235036|320632|100503670	Eif3a|Srsf10|Hsp90ab1|Eif6|Rpsa|Rbmx|Rps14|Rps15|Rps19|Rps5|Snu13|Rpl13a|Xrcc5|Prpf19|Rps28|Eif3d|Ptbp2|Rps27l|Nop53|Prpf31|Mrto4|Prpf3|Ckap5|Sf3b1|Mdn1|Psip1|Nop2|Srsf1|Rpl10|Prpf8|Gemin5|Ythdc1|Ppan|Snrnp200|Rpl5	-20
D4	GO Biological Processes	19	GO:0000398	mRNA splicing, via spliceosome	19_GO:0008152 metabolic process	-22	6.4	14	20504	280	494	43	8.7	1.3	11834|14105|14265|15382|15388|17975|19205|19655|19656|20218|20462|20624|20637|20826|24010|28000|28036|51796|53379|56195|67040|68183|68479|68981|68988|70052|70767|71514|71713|74351|75956|76572|81898|101214|101739|108014|110809|170791|192159|216766|225027|231386|320632	Aqr|Srsf10|Fmr1|Hnrnpa1|Hnrnpl|Ncl|Ptbp1|Rbmx|Rbmxl1|Khdrbs1|Tra2b|Eftud2|Snrnp70|Snu13|Ik|Prpf19|Larp7|Srrm1|Hnrnpa2b1|Ptbp2|Ddx17|Bcas2|Phf5a|Snrpa1|Prpf31|Prpf4|Prpf3|Sfpq|Cdc40|Ddx23|Srrm2|Rbmxl2|Sf3b1|Tra2a|Psip1|Srsf9|Srsf1|Rbm39|Prpf8|Gemin5|Srsf7|Ythdc1|Snrnp200	-20
D4	GO Biological Processes	19	GO:0000377	RNA splicing, via transesterification reactions with bulged adenosine as nucleophile	19_GO:0008152 metabolic process	-22	6.4	14	20504	280	494	43	8.7	1.3	11834|14105|14265|15382|15388|17975|19205|19655|19656|20218|20462|20624|20637|20826|24010|28000|28036|51796|53379|56195|67040|68183|68479|68981|68988|70052|70767|71514|71713|74351|75956|76572|81898|101214|101739|108014|110809|170791|192159|216766|225027|231386|320632	Aqr|Srsf10|Fmr1|Hnrnpa1|Hnrnpl|Ncl|Ptbp1|Rbmx|Rbmxl1|Khdrbs1|Tra2b|Eftud2|Snrnp70|Snu13|Ik|Prpf19|Larp7|Srrm1|Hnrnpa2b1|Ptbp2|Ddx17|Bcas2|Phf5a|Snrpa1|Prpf31|Prpf4|Prpf3|Sfpq|Cdc40|Ddx23|Srrm2|Rbmxl2|Sf3b1|Tra2a|Psip1|Srsf9|Srsf1|Rbm39|Prpf8|Gemin5|Srsf7|Ythdc1|Snrnp200	-20
D4	GO Biological Processes	19	GO:0000375	RNA splicing, via transesterification reactions	19_GO:0008152 metabolic process	-22	6.4	14	20504	280	494	43	8.7	1.3	11834|14105|14265|15382|15388|17975|19205|19655|19656|20218|20462|20624|20637|20826|24010|28000|28036|51796|53379|56195|67040|68183|68479|68981|68988|70052|70767|71514|71713|74351|75956|76572|81898|101214|101739|108014|110809|170791|192159|216766|225027|231386|320632	Aqr|Srsf10|Fmr1|Hnrnpa1|Hnrnpl|Ncl|Ptbp1|Rbmx|Rbmxl1|Khdrbs1|Tra2b|Eftud2|Snrnp70|Snu13|Ik|Prpf19|Larp7|Srrm1|Hnrnpa2b1|Ptbp2|Ddx17|Bcas2|Phf5a|Snrpa1|Prpf31|Prpf4|Prpf3|Sfpq|Cdc40|Ddx23|Srrm2|Rbmxl2|Sf3b1|Tra2a|Psip1|Srsf9|Srsf1|Rbm39|Prpf8|Gemin5|Srsf7|Ythdc1|Snrnp200	-20
D4	GO Biological Processes	19	GO:0071826	ribonucleoprotein complex subunit organization	19_GO:0009987 cellular process	-21	8.2	15	20504	178	494	35	7.1	1.2	13669|14105|15516|16418|16785|19655|20044|20054|20085|20103|20826|22121|22596|28000|54127|55944|56195|67941|68077|68988|69902|70767|75786|81898|100019|101739|110109|110809|110954|192159|216766|231386|235036|320632|100503670	Eif3a|Srsf10|Hsp90ab1|Eif6|Rpsa|Rbmx|Rps14|Rps15|Rps19|Rps5|Snu13|Rpl13a|Xrcc5|Prpf19|Rps28|Eif3d|Ptbp2|Rps27l|Nop53|Prpf31|Mrto4|Prpf3|Ckap5|Sf3b1|Mdn1|Psip1|Nop2|Srsf1|Rpl10|Prpf8|Gemin5|Ythdc1|Ppan|Snrnp200|Rpl5	-19
D4	KEGG Pathway	24	ko03040	Spliceosome		-20	9.4	15	20504	133	494	30	6.1	1.1	11834|13204|14105|15381|15382|19655|19656|20462|20624|20637|20826|28000|68183|68479|68981|68988|70052|70767|71713|74351|76572|81898|101214|108014|110809|192159|225027|229279|320632|331401	Aqr|Dhx15|Srsf10|Hnrnpc|Hnrnpa1|Rbmx|Rbmxl1|Tra2b|Eftud2|Snrnp70|Snu13|Prpf19|Bcas2|Phf5a|Snrpa1|Prpf31|Prpf4|Prpf3|Cdc40|Ddx23|Rbmxl2|Sf3b1|Tra2a|Srsf9|Srsf1|Prpf8|Srsf7|Hnrnpa3|Snrnp200|Thoc2	-18
D4	KEGG Pathway	24	mmu03040	Spliceosome		-20	9.4	15	20504	133	494	30	6.1	1.1	11834|13204|14105|15381|15382|19655|19656|20462|20624|20637|20826|28000|68183|68479|68981|68988|70052|70767|71713|74351|76572|81898|101214|108014|110809|192159|225027|229279|320632|331401	Aqr|Dhx15|Srsf10|Hnrnpc|Hnrnpa1|Rbmx|Rbmxl1|Tra2b|Eftud2|Snrnp70|Snu13|Prpf19|Bcas2|Phf5a|Snrpa1|Prpf31|Prpf4|Prpf3|Cdc40|Ddx23|Rbmxl2|Sf3b1|Tra2a|Srsf9|Srsf1|Prpf8|Srsf7|Hnrnpa3|Snrnp200|Thoc2	-18
D4	Reactome Gene Sets	6	R-MMU-1650814	Collagen biosynthesis and modifying enzymes		-20	15	17	20504	60	494	22	4.5	0.93	12406|12814|12818|12819|12822|12824|12825|12826|12827|12831|12832|12833|12834|12842|12843|18451|18452|18453|18822|26432|26433|234407	Serpinh1|Col11a1|Col14a1|Col15a1|Col18a1|Col2a1|Col3a1|Col4a1|Col4a2|Col5a1|Col5a2|Col6a1|Col6a2|Col1a1|Col1a2|P4ha1|P4ha2|P4hb|Plod1|Plod2|Plod3|Colgalt1	-18
D4	GO Biological Processes	19	GO:0002181	cytoplasmic translation	19_GO:0008152 metabolic process	-20	11	16	20504	96	494	26	5.3	1	12785|13629|13669|13681|14265|16785|18746|19899|19921|19951|20005|20090|22121|26961|54127|54217|54709|55944|66475|66481|67248|75786|76808|114641|225363|234734	Cnbp|Eef2|Eif3a|Eif4a1|Fmr1|Rpsa|Pkm|Rpl18|Rpl19|Rpl32|Rpl9|Rps29|Rpl13a|Rpl8|Rps28|Rpl36|Eif3i|Eif3d|Rps23|Rps21|Rpl39|Ckap5|Rpl18a|Rpl31|Etf1|Aars	-18
D4	GO Molecular Functions	21	GO:0004386	helicase activity		-20	8.5	15	20504	151	494	31	6.3	1.1	11834|13204|13205|13681|14375|16952|17215|17216|17218|17220|17454|19718|20586|22596|27041|27225|52513|56200|66942|67040|67755|69263|69663|71990|74351|78394|93762|106344|107932|228889|320632	Aqr|Dhx15|Ddx3x|Eif4a1|Xrcc6|Anxa1|Mcm3|Mcm2|Mcm5|Mcm7|Mov10|Rfc2|Smarca4|Xrcc5|G3bp1|Ddx24|Ddx56|Ddx21|Ddx18|Ddx17|Ddx47|Rfc3|Ddx51|Ddx54|Ddx23|Ddx52|Smarca5|Rfc4|Chd4|Ddx27|Snrnp200	-18
D4	GO Molecular Functions	21	GO:0140640	catalytic activity, acting on a nucleic acid		-18	4	11	20504	573	494	55	11	1.4	11834|12572|13006|13204|13205|13433|13681|14113|14375|15364|16881|16952|17215|17216|17218|17220|17454|17688|18538|19205|19687|19718|20586|21973|22594|22596|27041|27050|27225|52513|56095|56200|64424|66254|66942|67040|67619|67724|67755|69263|69663|70223|71990|74351|78394|93762|106344|107271|107932|110109|226414|228889|231329|234734|320632	Aqr|Cdk7|Smc3|Dhx15|Ddx3x|Dnmt1|Eif4a1|Fbl|Xrcc6|Hmga2|Lig1|Anxa1|Mcm3|Mcm2|Mcm5|Mcm7|Mov10|Msh6|Pcna|Ptbp1|Rfc1|Rfc2|Smarca4|Top2a|Xrcc1|Xrcc5|G3bp1|Rps3|Ddx24|Ddx56|Ftsj3|Ddx21|Polr1e|Dimt1|Ddx18|Ddx17|Nob1|Pop1|Ddx47|Rfc3|Ddx51|Nars|Ddx54|Ddx23|Ddx52|Smarca5|Rfc4|Yars|Chd4|Nop2|Dars|Ddx27|Polr2b|Aars|Snrnp200	-16
D4	Reactome Gene Sets	6	R-MMU-69278	Cell Cycle, Mitotic		-18	4.3	12	20504	496	494	51	10	1.4	12237|12572|13006|14211|15516|16319|16881|16905|16906|17215|17216|17218|17220|17222|18538|19179|19687|19718|20877|21762|22123|22145|22152|22367|22627|22628|24061|26965|51792|52276|54392|56086|59015|67089|67951|68275|69077|69263|70099|71805|71819|73710|75786|98386|100088|100710|106344|170762|215387|226747|268697	Bub3|Cdk7|Smc3|Smc2|Hsp90ab1|Incenp|Lig1|Lmna|Lmnb1|Mcm3|Mcm2|Mcm5|Mcm7|Anapc1|Pcna|Psmc1|Rfc1|Rfc2|Aurkb|Psmd2|Psmd3|Tuba4a|Tubb3|Vrk1|Ywhae|Ywhag|Smc1a|Cul1|Ppp2r1a|Cdca8|Ncapg|Set|Nup160|Psmc6|Tubb6|Rpa1|Psmd11|Rfc3|Smc4|Nup93|Kif23|Tubb2b|Ckap5|Lbr|Rcc1|Pds5b|Rfc4|Nup155|Ncaph|Ahctf1|Ccnb1	-16
D4	GO Biological Processes	19	GO:0006417	regulation of translation	19_GO:0008152 metabolic process	-18	4.8	12	20504	391	494	45	9.1	1.3	11991|12785|13205|13629|14265|14433|14694|15388|16201|16210|16341|16418|16549|17454|17975|18746|20091|20218|20430|21453|22121|22352|24015|27050|27979|52874|53872|55944|67941|68134|68966|72416|74326|76846|98956|108037|110954|140486|140488|216766|224742|225363|231659|234734|100503670	Hnrnpd|Cnbp|Ddx3x|Eef2|Fmr1|Gapdh|Rack1|Hnrnpl|Ilf3|Impact|Eif3e|Eif6|Khsrp|Mov10|Ncl|Pkm|Rps3a1|Khdrbs1|Cyfip1|Tcof1|Rpl13a|Vim|Abce1|Rps3|Eif3b|Pum3|Caprin1|Eif3d|Rps27l|Upf3b|Ngdn|Lrpprc|Hnrnpr|Rps9|Nat10|Shmt2|Rpl10|Igf2bp1|Igf2bp3|Gemin5|Abcf1|Etf1|Gcn1|Aars|Rpl5	-16
D4	Reactome Gene Sets	6	R-MMU-1474290	Collagen formation		-17	11	15	20504	81	494	22	4.5	0.93	12406|12814|12818|12819|12822|12824|12825|12826|12827|12831|12832|12833|12834|12842|12843|18451|18452|18453|18822|26432|26433|234407	Serpinh1|Col11a1|Col14a1|Col15a1|Col18a1|Col2a1|Col3a1|Col4a1|Col4a2|Col5a1|Col5a2|Col6a1|Col6a2|Col1a1|Col1a2|P4ha1|P4ha2|P4hb|Plod1|Plod2|Plod3|Colgalt1	-15
D4	GO Biological Processes	19	GO:0042274	ribosomal small subunit biogenesis	19_GO:0009987 cellular process	-17	12	15	20504	72	494	21	4.3	0.91	16785|20044|20054|20055|20068|20085|20103|20104|20116|20826|20935|22596|54127|66481|67619|67941|68966|75416|78394|98956|217431	Rpsa|Rps14|Rps15|Rps16|Rps17|Rps19|Rps5|Rps6|Rps8|Snu13|Surf6|Xrcc5|Rps28|Rps21|Nob1|Rps27l|Ngdn|Nop14|Ddx52|Nat10|Nol10	-15
D4	GO Biological Processes	19	GO:0000470	maturation of LSU-rRNA	19_GO:0008152 metabolic process	-16	21	17	20504	30	494	15	3	0.77	16418|19989|20826|56095|59050|64934|66229|66942|67920|67949|69237|70285|74035|76130|110109	Eif6|Rpl7|Snu13|Ftsj3|Nsa2|Pes1|Rpl7l1|Ddx18|Mak16|Nifk|Gtpbp4|Rpf1|Nol9|Las1l|Nop2	-14
D4	GO Molecular Functions	21	GO:0045182	translation regulator activity		-16	7.9	13	20504	141	494	27	5.5	1	12785|13361|13627|13629|13669|13681|14265|16341|16418|20044|20430|27979|53356|54709|55944|56347|66085|67941|76846|108037|110954|140486|217715|223691|224742|225363|234734	Cnbp|Dhfr|Eef1a1|Eef2|Eif3a|Eif4a1|Fmr1|Eif3e|Eif6|Rps14|Cyfip1|Eif3b|Eif3g|Eif3i|Eif3d|Eif3c|Eif3f|Rps27l|Rps9|Shmt2|Rpl10|Igf2bp1|Eif2b2|Eif3l|Abcf1|Etf1|Aars	-14
D4	Reactome Gene Sets	6	R-MMU-1640170	Cell Cycle		-16	3.8	11	20504	579	494	53	11	1.4	12237|12572|13006|14211|15516|16319|16881|16905|16906|17215|17216|17218|17220|17222|18538|19179|19687|19718|20877|21762|22123|22145|22152|22367|22627|22628|22631|24061|26965|51792|52276|54392|56086|59015|67089|67951|68275|69077|69263|70099|71805|71819|73710|75786|93762|98386|100088|100710|106344|170762|215387|226747|268697	Bub3|Cdk7|Smc3|Smc2|Hsp90ab1|Incenp|Lig1|Lmna|Lmnb1|Mcm3|Mcm2|Mcm5|Mcm7|Anapc1|Pcna|Psmc1|Rfc1|Rfc2|Aurkb|Psmd2|Psmd3|Tuba4a|Tubb3|Vrk1|Ywhae|Ywhag|Ywhaz|Smc1a|Cul1|Ppp2r1a|Cdca8|Ncapg|Set|Nup160|Psmc6|Tubb6|Rpa1|Psmd11|Rfc3|Smc4|Nup93|Kif23|Tubb2b|Ckap5|Smarca5|Lbr|Rcc1|Pds5b|Rfc4|Nup155|Ncaph|Ahctf1|Ccnb1	-14
D4	GO Biological Processes	19	GO:0010608	posttranscriptional regulation of gene expression	19_GO:0008152 metabolic process	-16	3.8	11	20504	583	494	53	11	1.4	11991|12785|13205|13629|14265|14433|14694|15388|16201|16210|16341|16418|16549|17184|17454|17975|18746|20091|20218|20430|21453|22121|22352|22608|24015|27050|27979|52874|53379|53872|55944|67941|68134|68966|72416|74326|75786|76846|83701|98956|108037|110809|110954|140486|140488|216766|224742|225363|231386|231659|233908|234734|100503670	Hnrnpd|Cnbp|Ddx3x|Eef2|Fmr1|Gapdh|Rack1|Hnrnpl|Ilf3|Impact|Eif3e|Eif6|Khsrp|Matr3|Mov10|Ncl|Pkm|Rps3a1|Khdrbs1|Cyfip1|Tcof1|Rpl13a|Vim|Ybx1|Abce1|Rps3|Eif3b|Pum3|Hnrnpa2b1|Caprin1|Eif3d|Rps27l|Upf3b|Ngdn|Lrpprc|Hnrnpr|Ckap5|Rps9|Srrt|Nat10|Shmt2|Srsf1|Rpl10|Igf2bp1|Igf2bp3|Gemin5|Abcf1|Etf1|Ythdc1|Gcn1|Fus|Aars|Rpl5	-14
D4	GO Biological Processes	19	GO:0071103	DNA conformation change	19_GO:0009987 cellular process	-16	6.3	12	20504	203	494	31	6.3	1.1	14211|15289|15364|15441|16319|16952|17215|17216|17218|17220|20586|20588|21973|23825|26914|50709|50927|53379|54392|56086|56702|68275|70099|75751|80838|93762|107435|108671|215387|243529|268697	Smc2|Hmgb1|Hmga2|Hp1bp3|Incenp|Anxa1|Mcm3|Mcm2|Mcm5|Mcm7|Smarca4|Smarcc1|Top2a|Banf1|Macroh2a1|H1f4|Nasp|Hnrnpa2b1|Ncapg|Set|H1f5|Rpa1|Smc4|Ipo4|H1f1|Smarca5|Hat1|Dnajc9|Ncaph|H1f10|Ccnb1	-14
D4	GO Biological Processes	19	GO:0042255	ribosome assembly	19_GO:0009987 cellular process	-16	13	14	20504	63	494	19	3.8	0.87	13205|16418|16785|20044|20054|20085|20103|20935|22596|54127|66164|67941|68077|69902|100019|110109|110954|235036|100503670	Ddx3x|Eif6|Rpsa|Rps14|Rps15|Rps19|Rps5|Surf6|Xrcc5|Rps28|Nip7|Rps27l|Nop53|Mrto4|Mdn1|Nop2|Rpl10|Ppan|Rpl5	-14
D4	GO Biological Processes	19	GO:0034248	regulation of cellular amide metabolic process	19_GO:0008152 metabolic process	-15	4.2	11	20504	449	494	45	9.1	1.3	11991|12785|13205|13629|14265|14433|14694|15388|16201|16210|16341|16418|16549|17454|17975|18746|20091|20218|20430|21453|22121|22352|24015|27050|27979|52874|53872|55944|67941|68134|68966|72416|74326|76846|98956|108037|110954|140486|140488|216766|224742|225363|231659|234734|100503670	Hnrnpd|Cnbp|Ddx3x|Eef2|Fmr1|Gapdh|Rack1|Hnrnpl|Ilf3|Impact|Eif3e|Eif6|Khsrp|Mov10|Ncl|Pkm|Rps3a1|Khdrbs1|Cyfip1|Tcof1|Rpl13a|Vim|Abce1|Rps3|Eif3b|Pum3|Caprin1|Eif3d|Rps27l|Upf3b|Ngdn|Lrpprc|Hnrnpr|Rps9|Nat10|Shmt2|Rpl10|Igf2bp1|Igf2bp3|Gemin5|Abcf1|Etf1|Gcn1|Aars|Rpl5	-13
D4	GO Molecular Functions	21	GO:0030020	extracellular matrix structural constituent conferring tensile strength		-14	16	15	20504	38	494	15	3	0.77	12814|12818|12819|12822|12824|12825|12826|12827|12831|12832|12833|12834|12835|12842|12843	Col11a1|Col14a1|Col15a1|Col18a1|Col2a1|Col3a1|Col4a1|Col4a2|Col5a1|Col5a2|Col6a1|Col6a2|Col6a3|Col1a1|Col1a2	-13
D4	GO Biological Processes	19	GO:0043484	regulation of RNA splicing	19_GO:0008152 metabolic process	-14	6.8	12	20504	158	494	26	5.3	1	14105|14265|15388|17975|19205|19655|19656|20218|20462|20637|28000|28036|53379|56195|66395|67040|68052|76572|101214|108014|110809|170791|225027|231386|233908|432467	Srsf10|Fmr1|Hnrnpl|Ncl|Ptbp1|Rbmx|Rbmxl1|Khdrbs1|Tra2b|Snrnp70|Prpf19|Larp7|Hnrnpa2b1|Ptbp2|Ahnak|Ddx17|Rps13|Rbmxl2|Tra2a|Srsf9|Srsf1|Rbm39|Srsf7|Ythdc1|Fus|Hnrnph3	-12
D4	GO Molecular Functions	21	GO:0019843	rRNA binding		-14	11	13	20504	75	494	19	3.8	0.87	13629|17975|19921|19981|19989|20005|20044|20103|26961|27050|27207|27993|56200|68052|68077|70285|76846|235036|100503670	Eef2|Ncl|Rpl19|Rpl37a|Rpl7|Rpl9|Rps14|Rps5|Rpl8|Rps3|Rps11|Imp4|Ddx21|Rps13|Nop53|Rpf1|Rps9|Ppan|Rpl5	-12
D4	GO Biological Processes	19	GO:0140694	non-membrane-bounded organelle assembly	19_GO:0009987 cellular process	-14	4.3	10	20504	374	494	39	7.9	1.2	13006|13008|13205|14086|16319|16418|16551|16785|16800|20044|20054|20085|20103|20877|20935|22596|23881|24061|26934|27041|27050|54127|66164|66475|67300|67941|68077|69902|71819|77579|100019|100088|110109|110954|192176|218977|233871|235036|100503670	Smc3|Csrp2|Ddx3x|Fscn1|Incenp|Eif6|Kif11|Rpsa|Arhgef2|Rps14|Rps15|Rps19|Rps5|Aurkb|Surf6|Xrcc5|G3bp2|Smc1a|Racgap1|G3bp1|Rps3|Rps28|Nip7|Rps23|Cltc|Rps27l|Nop53|Mrto4|Kif23|Myh10|Mdn1|Rcc1|Nop2|Rpl10|Flna|Dlgap5|Atxn2l|Ppan|Rpl5	-12
D4	GO Biological Processes	19	GO:1903311	regulation of mRNA metabolic process	19_GO:0008152 metabolic process	-13	4.8	10	20504	293	494	34	6.9	1.1	11991|14105|14265|15381|15388|16549|17454|17975|19205|19655|19656|20218|20462|20637|22352|22608|28000|28036|53379|66660|67040|74326|76572|101214|108014|110809|140486|170791|224902|224903|225027|231386|233908|268697	Hnrnpd|Srsf10|Fmr1|Hnrnpc|Hnrnpl|Khsrp|Mov10|Ncl|Ptbp1|Rbmx|Rbmxl1|Khdrbs1|Tra2b|Snrnp70|Vim|Ybx1|Prpf19|Larp7|Hnrnpa2b1|Sltm|Ddx17|Hnrnpr|Rbmxl2|Tra2a|Srsf9|Srsf1|Igf2bp1|Rbm39|Safb2|Safb|Srsf7|Ythdc1|Fus|Ccnb1	-12
D4	GO Molecular Functions	21	GO:0048027	mRNA 5'-UTR binding		-13	19	15	20504	29	494	13	2.6	0.72	12465|13205|14265|17975|20044|20091|30877|68052|77579|108037|140486|140488|100503670	Cct5|Ddx3x|Fmr1|Ncl|Rps14|Rps3a1|Gnl3|Rps13|Myh10|Shmt2|Igf2bp1|Igf2bp3|Rpl5	-12
D4	GO Biological Processes	19	GO:0006323	DNA packaging	19_GO:0009987 cellular process	-13	6.7	11	20504	155	494	25	5.1	0.99	14211|15289|15364|15441|16319|17216|20586|20588|21973|23825|26914|50709|50927|54392|56086|56702|70099|75751|80838|93762|107435|108671|215387|243529|268697	Smc2|Hmgb1|Hmga2|Hp1bp3|Incenp|Mcm2|Smarca4|Smarcc1|Top2a|Banf1|Macroh2a1|H1f4|Nasp|Ncapg|Set|H1f5|Smc4|Ipo4|H1f1|Smarca5|Hat1|Dnajc9|Ncaph|H1f10|Ccnb1	-12
D4	GO Molecular Functions	21	GO:0003724	RNA helicase activity		-13	10	12	20504	73	494	18	3.6	0.84	11834|13204|13205|13681|17454|27041|27225|52513|56200|66942|67040|67755|69663|71990|74351|78394|228889|320632	Aqr|Dhx15|Ddx3x|Eif4a1|Mov10|G3bp1|Ddx24|Ddx56|Ddx21|Ddx18|Ddx17|Ddx47|Ddx51|Ddx54|Ddx23|Ddx52|Ddx27|Snrnp200	-11
D4	GO Biological Processes	19	GO:0006403	RNA localization	19_GO:0051179 localization	-13	6.2	11	20504	174	494	26	5.3	1	12464|14113|14265|15382|16549|20218|21454|22608|23881|53319|53379|55989|59015|66511|71805|72416|75786|110809|140486|140488|170762|225027|226747|229279|231386|331401	Cct4|Fbl|Fmr1|Hnrnpa1|Khsrp|Khdrbs1|Tcp1|Ybx1|G3bp2|Nxf1|Hnrnpa2b1|Nop58|Nup160|Chtop|Nup93|Lrpprc|Ckap5|Srsf1|Igf2bp1|Igf2bp3|Nup155|Srsf7|Ahctf1|Hnrnpa3|Ythdc1|Thoc2	-11
D4	GO Molecular Functions	21	GO:0008186	ATP-dependent activity, acting on RNA		-13	10	12	20504	75	494	18	3.6	0.84	11834|13204|13205|13681|17454|27041|27225|52513|56200|66942|67040|67755|69663|71990|74351|78394|228889|320632	Aqr|Dhx15|Ddx3x|Eif4a1|Mov10|G3bp1|Ddx24|Ddx56|Ddx21|Ddx18|Ddx17|Ddx47|Ddx51|Ddx54|Ddx23|Ddx52|Ddx27|Snrnp200	-11
D4	GO Biological Processes	19	GO:0050684	regulation of mRNA processing	19_GO:0008152 metabolic process	-13	6.7	11	20504	149	494	24	4.9	0.97	14105|14265|15388|17975|19205|19655|19656|20218|20462|20637|28000|28036|53379|66660|67040|76572|101214|108014|170791|224902|224903|225027|231386|268697	Srsf10|Fmr1|Hnrnpl|Ncl|Ptbp1|Rbmx|Rbmxl1|Khdrbs1|Tra2b|Snrnp70|Prpf19|Larp7|Hnrnpa2b1|Sltm|Ddx17|Rbmxl2|Tra2a|Srsf9|Rbm39|Safb2|Safb|Srsf7|Ythdc1|Ccnb1	-11
D4	Reactome Gene Sets	6	R-MMU-8948216	Collagen chain trimerization		-13	15	13	20504	40	494	14	2.8	0.75	12814|12818|12819|12822|12824|12825|12826|12827|12831|12832|12833|12834|12842|12843	Col11a1|Col14a1|Col15a1|Col18a1|Col2a1|Col3a1|Col4a1|Col4a2|Col5a1|Col5a2|Col6a1|Col6a2|Col1a1|Col1a2	-11
D4	WikiPathways	27	WP246	TNF-alpha NF-kB signaling pathway		-12	5.8	10	20504	186	494	26	5.3	1	11647|13205|14113|14694|15185|15507|15516|16709|17218|17220|19179|20586|20588|22123|22627|22628|22631|23881|26961|26965|27207|64424|68052|72416|192176|230233	Alpl|Ddx3x|Fbl|Rack1|Hdac6|Hspb1|Hsp90ab1|Ktn1|Mcm5|Mcm7|Psmc1|Smarca4|Smarcc1|Psmd3|Ywhae|Ywhag|Ywhaz|G3bp2|Rpl8|Cul1|Rps11|Polr1e|Rps13|Lrpprc|Flna|Elp1	-11
D4	Reactome Gene Sets	6	R-MMU-68886	M Phase		-12	4	9.4	20504	380	494	37	7.5	1.2	12237|13006|14211|16319|16905|16906|17222|19179|20877|21762|22123|22145|22152|22367|22627|22628|24061|51792|52276|54392|56086|59015|67089|67951|69077|70099|71805|71819|73710|75786|98386|100088|100710|170762|215387|226747|268697	Bub3|Smc3|Smc2|Incenp|Lmna|Lmnb1|Anapc1|Psmc1|Aurkb|Psmd2|Psmd3|Tuba4a|Tubb3|Vrk1|Ywhae|Ywhag|Smc1a|Ppp2r1a|Cdca8|Ncapg|Set|Nup160|Psmc6|Tubb6|Psmd11|Smc4|Nup93|Kif23|Tubb2b|Ckap5|Lbr|Rcc1|Pds5b|Nup155|Ncaph|Ahctf1|Ccnb1	-11
D4	GO Molecular Functions	21	GO:0008094	ATP-dependent activity, acting on DNA		-12	7.5	11	20504	110	494	20	4	0.89	12572|13006|13205|14375|16952|17215|17216|17218|17220|17688|19687|19718|20586|21973|22596|27041|69263|93762|106344|107932	Cdk7|Smc3|Ddx3x|Xrcc6|Anxa1|Mcm3|Mcm2|Mcm5|Mcm7|Msh6|Rfc1|Rfc2|Smarca4|Top2a|Xrcc5|G3bp1|Rfc3|Smarca5|Rfc4|Chd4	-10
D4	Reactome Gene Sets	6	R-MMU-68882	Mitotic Anaphase		-12	5.3	9.8	20504	213	494	27	5.5	1	12237|13006|16319|17222|19179|20877|21762|22123|22145|22152|22367|24061|51792|52276|59015|67089|67951|69077|71805|73710|75786|98386|100088|100710|170762|226747|268697	Bub3|Smc3|Incenp|Anapc1|Psmc1|Aurkb|Psmd2|Psmd3|Tuba4a|Tubb3|Vrk1|Smc1a|Ppp2r1a|Cdca8|Nup160|Psmc6|Tubb6|Psmd11|Nup93|Tubb2b|Ckap5|Lbr|Rcc1|Pds5b|Nup155|Ahctf1|Ccnb1	-10
D4	GO Biological Processes	19	GO:0048024	regulation of mRNA splicing, via spliceosome	19_GO:0008152 metabolic process	-12	7.5	11	20504	111	494	20	4	0.89	14105|14265|15388|17975|19205|19655|19656|20218|20462|20637|28000|28036|53379|67040|76572|101214|108014|170791|225027|231386	Srsf10|Fmr1|Hnrnpl|Ncl|Ptbp1|Rbmx|Rbmxl1|Khdrbs1|Tra2b|Snrnp70|Prpf19|Larp7|Hnrnpa2b1|Ddx17|Rbmxl2|Tra2a|Srsf9|Rbm39|Srsf7|Ythdc1	-10
D4	Reactome Gene Sets	6	R-MMU-2555396	Mitotic Metaphase and Anaphase		-12	5.2	9.8	20504	214	494	27	5.5	1	12237|13006|16319|17222|19179|20877|21762|22123|22145|22152|22367|24061|51792|52276|59015|67089|67951|69077|71805|73710|75786|98386|100088|100710|170762|226747|268697	Bub3|Smc3|Incenp|Anapc1|Psmc1|Aurkb|Psmd2|Psmd3|Tuba4a|Tubb3|Vrk1|Smc1a|Ppp2r1a|Cdca8|Nup160|Psmc6|Tubb6|Psmd11|Nup93|Tubb2b|Ckap5|Lbr|Rcc1|Pds5b|Nup155|Ahctf1|Ccnb1	-10
D4	Reactome Gene Sets	6	R-MMU-69242	S Phase		-11	6.5	10	20504	141	494	22	4.5	0.93	12572|13006|16881|17215|17216|17218|17220|17222|18538|19179|19687|19718|21762|22123|24061|26965|67089|68275|69077|69263|100710|106344	Cdk7|Smc3|Lig1|Mcm3|Mcm2|Mcm5|Mcm7|Anapc1|Pcna|Psmc1|Rfc1|Rfc2|Psmd2|Psmd3|Smc1a|Cul1|Psmc6|Rpa1|Psmd11|Rfc3|Pds5b|Rfc4	-9.9
D4	GO Biological Processes	19	GO:0051052	regulation of DNA metabolic process	19_GO:0008152 metabolic process	-11	3.9	8.9	20504	388	494	36	7.3	1.2	11545|11991|12462|12464|12465|12466|13433|14897|15289|15364|15516|16905|17688|18538|19718|20877|21454|22042|22594|22596|27050|30877|50709|51869|53379|54427|56702|67459|69263|73945|80838|98956|106344|170787|233908|243529	Parp1|Hnrnpd|Cct3|Cct4|Cct5|Cct6a|Dnmt1|Trip12|Hmgb1|Hmga2|Hsp90ab1|Lmna|Msh6|Pcna|Rfc2|Aurkb|Tcp1|Tfrc|Xrcc1|Xrcc5|Rps3|Gnl3|H1f4|Rif1|Hnrnpa2b1|Dnmt3l|H1f5|Nvl|Rfc3|Otud4|H1f1|Nat10|Rfc4|Hdac10|Fus|H1f10	-9.8
D4	WikiPathways	27	WP307	Translation factors		-11	12	12	20504	49	494	14	2.8	0.75	13627|13629|13669|13681|16341|16418|27979|53356|54709|55944|56347|66085|217715|225363	Eef1a1|Eef2|Eif3a|Eif4a1|Eif3e|Eif6|Eif3b|Eif3g|Eif3i|Eif3d|Eif3c|Eif3f|Eif2b2|Etf1	-9.7
D4	GO Molecular Functions	21	GO:0140097	catalytic activity, acting on DNA		-11	5	9.5	20504	223	494	27	5.5	1	12572|13006|13205|13433|14375|15364|16881|16952|17215|17216|17218|17220|17688|18538|19205|19687|19718|20586|21973|22594|22596|27041|27050|69263|93762|106344|107932	Cdk7|Smc3|Ddx3x|Dnmt1|Xrcc6|Hmga2|Lig1|Anxa1|Mcm3|Mcm2|Mcm5|Mcm7|Msh6|Pcna|Ptbp1|Rfc1|Rfc2|Smarca4|Top2a|Xrcc1|Xrcc5|G3bp1|Rps3|Rfc3|Smarca5|Rfc4|Chd4	-9.7
D4	GO Molecular Functions	21	GO:0016887	ATP hydrolysis activity		-11	5	9.4	20504	225	494	27	5.5	1	11947|12462|12464|12465|12466|13006|13205|14211|14828|15516|15526|15528|19179|19687|19718|20586|21454|24015|24061|67089|67459|69716|70099|71819|93762|106344|224742	Atp5b|Cct3|Cct4|Cct5|Cct6a|Smc3|Ddx3x|Smc2|Hspa5|Hsp90ab1|Hspa9|Hspe1|Psmc1|Rfc1|Rfc2|Smarca4|Tcp1|Abce1|Smc1a|Psmc6|Nvl|Trip13|Smc4|Kif23|Smarca5|Rfc4|Abcf1	-9.6
D4	GO Molecular Functions	21	GO:0005201	extracellular matrix structural constituent		-11	6.1	9.9	20504	149	494	22	4.5	0.93	12814|12818|12819|12822|12824|12825|12826|12827|12831|12832|12833|12834|12835|12842|12843|14118|14119|14268|15530|17304|18074|100952	Col11a1|Col14a1|Col15a1|Col18a1|Col2a1|Col3a1|Col4a1|Col4a2|Col5a1|Col5a2|Col6a1|Col6a2|Col6a3|Col1a1|Col1a2|Fbn1|Fbn2|Fn1|Hspg2|Mfge8|Nid2|Emilin1	-9.5
D4	GO Molecular Functions	21	GO:0090079	translation regulator activity, nucleic acid binding		-11	7.3	10	20504	108	494	19	3.8	0.87	13361|13627|13629|13669|13681|16341|16418|27979|53356|54709|55944|56347|66085|67941|108037|217715|223691|224742|225363	Dhfr|Eef1a1|Eef2|Eif3a|Eif4a1|Eif3e|Eif6|Eif3b|Eif3g|Eif3i|Eif3d|Eif3c|Eif3f|Rps27l|Shmt2|Eif2b2|Eif3l|Abcf1|Etf1	-9.4
D4	KEGG Pathway	24	ko03013	RNA transport		-11	5.7	9.6	20504	167	494	23	4.7	0.95	13627|13669|13681|14265|16341|20430|27979|51796|53319|53356|54709|55944|56347|59015|66085|67724|68134|70699|71805|170762|216766|217715|331401	Eef1a1|Eif3a|Eif4a1|Fmr1|Eif3e|Cyfip1|Eif3b|Srrm1|Nxf1|Eif3g|Eif3i|Eif3d|Eif3c|Nup160|Eif3f|Pop1|Upf3b|Nup205|Nup93|Nup155|Gemin5|Eif2b2|Thoc2	-9.3
D4	GO Molecular Functions	21	GO:0043021	ribonucleoprotein complex binding		-11	5.7	9.6	20504	168	494	23	4.7	0.95	13205|13629|14265|14694|14828|15381|15469|16210|16418|16785|20637|24015|56347|56449|66525|67459|68988|70998|74838|75786|216766|224742|231659	Ddx3x|Eef2|Fmr1|Rack1|Hspa5|Hnrnpc|Prmt1|Impact|Eif6|Rpsa|Snrnp70|Abce1|Eif3c|Ybx3|Timm50|Nvl|Prpf31|Phf6|Naa15|Ckap5|Gemin5|Abcf1|Gcn1	-9.3
D4	KEGG Pathway	24	mmu03013	RNA transport		-11	5.7	9.6	20504	168	494	23	4.7	0.95	13627|13669|13681|14265|16341|20430|27979|51796|53319|53356|54709|55944|56347|59015|66085|67724|68134|70699|71805|170762|216766|217715|331401	Eef1a1|Eif3a|Eif4a1|Fmr1|Eif3e|Cyfip1|Eif3b|Srrm1|Nxf1|Eif3g|Eif3i|Eif3d|Eif3c|Nup160|Eif3f|Pop1|Upf3b|Nup205|Nup93|Nup155|Gemin5|Eif2b2|Thoc2	-9.3
D4	GO Biological Processes	19	GO:0033044	regulation of chromosome organization	19_GO:0050789 regulation of biological process	-11	5.4	9.4	20504	185	494	24	4.9	0.97	11545|11991|12237|12462|12464|12465|12466|13433|16905|17216|17222|20877|21454|21973|22594|22596|24010|26914|30877|53379|69716|71514|98956|268697	Parp1|Hnrnpd|Bub3|Cct3|Cct4|Cct5|Cct6a|Dnmt1|Lmna|Mcm2|Anapc1|Aurkb|Tcp1|Top2a|Xrcc1|Xrcc5|Ik|Macroh2a1|Gnl3|Hnrnpa2b1|Trip13|Sfpq|Nat10|Ccnb1	-9.2
D4	Reactome Gene Sets	6	R-MMU-1474244	Extracellular matrix organization		-11	4.5	9	20504	256	494	28	5.7	1	12406|12814|12818|12819|12822|12824|12825|12826|12827|12831|12832|12833|12834|12842|12843|14118|14119|14268|15530|18074|18451|18452|18453|18822|26432|26433|100952|234407	Serpinh1|Col11a1|Col14a1|Col15a1|Col18a1|Col2a1|Col3a1|Col4a1|Col4a2|Col5a1|Col5a2|Col6a1|Col6a2|Col1a1|Col1a2|Fbn1|Fbn2|Fn1|Hspg2|Nid2|P4ha1|P4ha2|P4hb|Plod1|Plod2|Plod3|Emilin1|Colgalt1	-9.1
D4	GO Biological Processes	19	GO:0030261	chromosome condensation	19_GO:0009987 cellular process	-11	12	12	20504	45	494	13	2.6	0.72	14211|15364|16319|21973|23825|50709|54392|56702|70099|80838|215387|243529|268697	Smc2|Hmga2|Incenp|Top2a|Banf1|H1f4|Ncapg|H1f5|Smc4|H1f1|Ncaph|H1f10|Ccnb1	-9.1
D4	Reactome Gene Sets	6	R-MMU-1442490	Collagen degradation		-11	12	12	20504	45	494	13	2.6	0.72	12814|12819|12822|12824|12825|12826|12827|12831|12832|12833|12834|12842|12843	Col11a1|Col15a1|Col18a1|Col2a1|Col3a1|Col4a1|Col4a2|Col5a1|Col5a2|Col6a1|Col6a2|Col1a1|Col1a2	-9.1
D4	GO Biological Processes	19	GO:0051054	positive regulation of DNA metabolic process	19_GO:0048518 positive regulation of biological process	-11	4.9	9.1	20504	222	494	26	5.3	1	11545|11991|12462|12464|12465|12466|15289|15516|18538|19718|20877|21454|22042|22594|22596|27050|30877|51869|53379|54427|67459|69263|73945|106344|170787|233908	Parp1|Hnrnpd|Cct3|Cct4|Cct5|Cct6a|Hmgb1|Hsp90ab1|Pcna|Rfc2|Aurkb|Tcp1|Tfrc|Xrcc1|Xrcc5|Rps3|Gnl3|Rif1|Hnrnpa2b1|Dnmt3l|Nvl|Rfc3|Otud4|Rfc4|Hdac10|Fus	-9.1
D4	Reactome Gene Sets	6	R-MMU-2022090	Assembly of collagen fibrils and other multimeric structures		-10	10	11	20504	56	494	14	2.8	0.75	12814|12818|12819|12822|12824|12825|12826|12827|12831|12832|12833|12834|12842|12843	Col11a1|Col14a1|Col15a1|Col18a1|Col2a1|Col3a1|Col4a1|Col4a2|Col5a1|Col5a2|Col6a1|Col6a2|Col1a1|Col1a2	-8.9
D4	GO Biological Processes	19	GO:0032200	telomere organization	19_GO:0009987 cellular process	-10	6.3	9.6	20504	131	494	20	4	0.89	11545|11991|12462|12464|12465|12466|14375|15516|16905|18538|20877|21454|22594|22596|30877|51869|53379|68275|98956|107435	Parp1|Hnrnpd|Cct3|Cct4|Cct5|Cct6a|Xrcc6|Hsp90ab1|Lmna|Pcna|Aurkb|Tcp1|Xrcc1|Xrcc5|Gnl3|Rif1|Hnrnpa2b1|Rpa1|Nat10|Hat1	-8.9
D4	GO Biological Processes	19	GO:0045727	positive regulation of translation	19_GO:0048518 positive regulation of biological process	-10	6.3	9.6	20504	131	494	20	4	0.89	11991|12785|13205|13629|14265|15388|16210|16341|16418|18746|20091|20218|22352|55944|67941|68134|76846|98956|224742|100503670	Hnrnpd|Cnbp|Ddx3x|Eef2|Fmr1|Hnrnpl|Impact|Eif3e|Eif6|Pkm|Rps3a1|Khdrbs1|Vim|Eif3d|Rps27l|Upf3b|Rps9|Nat10|Abcf1|Rpl5	-8.9
D4	GO Biological Processes	19	GO:0051028	mRNA transport	19_GO:0051179 localization	-10	6.7	9.8	20504	117	494	19	3.8	0.87	14265|15382|16549|23881|53319|53379|59015|66511|71805|72416|110809|140486|140488|170762|225027|226747|229279|231386|331401	Fmr1|Hnrnpa1|Khsrp|G3bp2|Nxf1|Hnrnpa2b1|Nup160|Chtop|Nup93|Lrpprc|Srsf1|Igf2bp1|Igf2bp3|Nup155|Srsf7|Ahctf1|Hnrnpa3|Ythdc1|Thoc2	-8.9
D4	KEGG Pathway	24	mmu03008	Ribosome biogenesis in eukaryotes		-10	6.7	9.8	20504	117	494	19	3.8	0.87	14113|16418|20826|21453|27993|30877|53319|55989|67134|67459|67619|67724|69237|72515|72554|98956|100019|140488|230737	Fbl|Eif6|Snu13|Tcof1|Imp4|Gnl3|Nxf1|Nop58|Nop56|Nvl|Nob1|Pop1|Gtpbp4|Wdr43|Utp14a|Nat10|Mdn1|Igf2bp3|Gnl2	-8.9
D4	GO Biological Processes	19	GO:0050658	RNA transport	19_GO:0051179 localization	-10	5.9	9.4	20504	147	494	21	4.3	0.91	14265|15382|16549|20218|22608|23881|53319|53379|59015|66511|71805|72416|110809|140486|140488|170762|225027|226747|229279|231386|331401	Fmr1|Hnrnpa1|Khsrp|Khdrbs1|Ybx1|G3bp2|Nxf1|Hnrnpa2b1|Nup160|Chtop|Nup93|Lrpprc|Srsf1|Igf2bp1|Igf2bp3|Nup155|Srsf7|Ahctf1|Hnrnpa3|Ythdc1|Thoc2	-8.8
D4	GO Biological Processes	19	GO:0050657	nucleic acid transport	19_GO:0051179 localization	-10	5.9	9.4	20504	147	494	21	4.3	0.91	14265|15382|16549|20218|22608|23881|53319|53379|59015|66511|71805|72416|110809|140486|140488|170762|225027|226747|229279|231386|331401	Fmr1|Hnrnpa1|Khsrp|Khdrbs1|Ybx1|G3bp2|Nxf1|Hnrnpa2b1|Nup160|Chtop|Nup93|Lrpprc|Srsf1|Igf2bp1|Igf2bp3|Nup155|Srsf7|Ahctf1|Hnrnpa3|Ythdc1|Thoc2	-8.8
D4	GO Biological Processes	19	GO:0006413	translational initiation	19_GO:0008152 metabolic process	-10	6.6	9.7	20504	119	494	19	3.8	0.87	13205|13669|13681|14265|16210|16341|16418|20218|22121|24015|27979|53356|54709|55944|56347|66085|217715|223691|224742	Ddx3x|Eif3a|Eif4a1|Fmr1|Impact|Eif3e|Eif6|Khdrbs1|Rpl13a|Abce1|Eif3b|Eif3g|Eif3i|Eif3d|Eif3c|Eif3f|Eif2b2|Eif3l|Abcf1	-8.7
D4	GO Biological Processes	19	GO:0051236	establishment of RNA localization	19_GO:0051179 localization	-10	5.8	9.3	20504	150	494	21	4.3	0.91	14265|15382|16549|20218|22608|23881|53319|53379|59015|66511|71805|72416|110809|140486|140488|170762|225027|226747|229279|231386|331401	Fmr1|Hnrnpa1|Khsrp|Khdrbs1|Ybx1|G3bp2|Nxf1|Hnrnpa2b1|Nup160|Chtop|Nup93|Lrpprc|Srsf1|Igf2bp1|Igf2bp3|Nup155|Srsf7|Ahctf1|Hnrnpa3|Ythdc1|Thoc2	-8.6
D4	GO Biological Processes	19	GO:0030490	maturation of SSU-rRNA	19_GO:0008152 metabolic process	-10	11	11	20504	49	494	13	2.6	0.72	20044|20055|20085|20116|20826|54127|66481|67619|68966|75416|78394|98956|217431	Rps14|Rps16|Rps19|Rps8|Snu13|Rps28|Rps21|Nob1|Ngdn|Nop14|Ddx52|Nat10|Nol10	-8.6
D4	GO Molecular Functions	21	GO:0017111	nucleoside-triphosphatase activity		-9.9	3.2	7.9	20504	523	494	40	8.1	1.2	11947|12462|12464|12465|12466|13006|13205|13627|13629|14211|14678|14683|14693|14828|15516|15526|15528|19179|19330|19687|19718|20586|20624|21454|22145|22152|24015|24061|67089|67459|67951|69237|69716|70099|71819|73710|74143|93762|106344|224742	Atp5b|Cct3|Cct4|Cct5|Cct6a|Smc3|Ddx3x|Eef1a1|Eef2|Smc2|Gnai2|Gnas|Gnb2|Hspa5|Hsp90ab1|Hspa9|Hspe1|Psmc1|Rab18|Rfc1|Rfc2|Smarca4|Eftud2|Tcp1|Tuba4a|Tubb3|Abce1|Smc1a|Psmc6|Nvl|Tubb6|Gtpbp4|Trip13|Smc4|Kif23|Tubb2b|Opa1|Smarca5|Rfc4|Abcf1	-8.5
D4	GO Biological Processes	19	GO:0000723	telomere maintenance	19_GO:0008152 metabolic process	-9.7	6.3	9.3	20504	126	494	19	3.8	0.87	11545|11991|12462|12464|12465|12466|14375|15516|16905|18538|20877|21454|22594|22596|30877|51869|53379|68275|98956	Parp1|Hnrnpd|Cct3|Cct4|Cct5|Cct6a|Xrcc6|Hsp90ab1|Lmna|Pcna|Aurkb|Tcp1|Xrcc1|Xrcc5|Gnl3|Rif1|Hnrnpa2b1|Rpa1|Nat10	-8.3
D4	GO Molecular Functions	21	GO:0016462	pyrophosphatase activity		-9.7	3	7.7	20504	577	494	42	8.5	1.3	11647|11947|12462|12464|12465|12466|13006|13205|13627|13629|14211|14678|14683|14693|14828|15516|15526|15528|19179|19330|19687|19718|20586|20624|21454|22145|22152|24015|24061|67089|67459|67951|69237|69716|70099|71819|73710|74143|93762|106344|224742|229363	Alpl|Atp5b|Cct3|Cct4|Cct5|Cct6a|Smc3|Ddx3x|Eef1a1|Eef2|Smc2|Gnai2|Gnas|Gnb2|Hspa5|Hsp90ab1|Hspa9|Hspe1|Psmc1|Rab18|Rfc1|Rfc2|Smarca4|Eftud2|Tcp1|Tuba4a|Tubb3|Abce1|Smc1a|Psmc6|Nvl|Tubb6|Gtpbp4|Trip13|Smc4|Kif23|Tubb2b|Opa1|Smarca5|Rfc4|Abcf1|Gmps	-8.3
D4	GO Molecular Functions	21	GO:0003682	chromatin binding		-9.7	2.9	7.6	20504	649	494	45	9.1	1.3	11545|11991|13006|13433|14211|14265|15364|15441|16468|17688|18150|18538|19655|19656|20586|20588|20674|20833|21973|22367|22608|22715|24061|26914|50709|53610|56086|56702|57753|68275|70099|71514|74022|80838|81898|93762|100088|101739|108037|210711|215387|224903|231329|233908|243529	Parp1|Hnrnpd|Smc3|Dnmt1|Smc2|Fmr1|Hmga2|Hp1bp3|Jarid2|Msh6|Npm3|Pcna|Rbmx|Rbmxl1|Smarca4|Smarcc1|Sox2|Ssrp1|Top2a|Vrk1|Ybx1|Zfp57|Smc1a|Macroh2a1|H1f4|Nono|Set|H1f5|Noc3l|Rpa1|Smc4|Sfpq|Glyr1|H1f1|Sf3b1|Smarca5|Rcc1|Psip1|Shmt2|Mcmbp|Ncaph|Safb|Polr2b|Fus|H1f10	-8.3
D4	Reactome Gene Sets	6	R-MMU-69239	Synthesis of DNA		-9.6	6.6	9.3	20504	114	494	18	3.6	0.84	16881|17215|17216|17218|17220|17222|18538|19179|19687|19718|21762|22123|26965|67089|68275|69077|69263|106344	Lig1|Mcm3|Mcm2|Mcm5|Mcm7|Anapc1|Pcna|Psmc1|Rfc1|Rfc2|Psmd2|Psmd3|Cul1|Psmc6|Rpa1|Psmd11|Rfc3|Rfc4	-8.2
D4	GO Molecular Functions	21	GO:0016818	hydrolase activity, acting on acid anhydrides, in phosphorus-containing anhydrides		-9.5	3	7.6	20504	586	494	42	8.5	1.3	11647|11947|12462|12464|12465|12466|13006|13205|13627|13629|14211|14678|14683|14693|14828|15516|15526|15528|19179|19330|19687|19718|20586|20624|21454|22145|22152|24015|24061|67089|67459|67951|69237|69716|70099|71819|73710|74143|93762|106344|224742|229363	Alpl|Atp5b|Cct3|Cct4|Cct5|Cct6a|Smc3|Ddx3x|Eef1a1|Eef2|Smc2|Gnai2|Gnas|Gnb2|Hspa5|Hsp90ab1|Hspa9|Hspe1|Psmc1|Rab18|Rfc1|Rfc2|Smarca4|Eftud2|Tcp1|Tuba4a|Tubb3|Abce1|Smc1a|Psmc6|Nvl|Tubb6|Gtpbp4|Trip13|Smc4|Kif23|Tubb2b|Opa1|Smarca5|Rfc4|Abcf1|Gmps	-8.1
D4	KEGG Pathway	24	ko03008	Ribosome biogenesis in eukaryotes		-9.5	6.4	9.2	20504	116	494	18	3.6	0.84	14113|16418|20826|21453|27993|30877|53319|55989|67134|67459|67619|67724|69237|72515|72554|98956|100019|230737	Fbl|Eif6|Snu13|Tcof1|Imp4|Gnl3|Nxf1|Nop58|Nop56|Nvl|Nob1|Pop1|Gtpbp4|Wdr43|Utp14a|Nat10|Mdn1|Gnl2	-8.1
D4	KEGG Pathway	24	ko03030	DNA replication		-9.5	13	11	20504	35	494	11	2.2	0.66	16881|17215|17216|17218|17220|18538|19687|19718|68275|69263|106344	Lig1|Mcm3|Mcm2|Mcm5|Mcm7|Pcna|Rfc1|Rfc2|Rpa1|Rfc3|Rfc4	-8.1
D4	GO Molecular Functions	21	GO:0016817	hydrolase activity, acting on acid anhydrides		-9.4	3	7.6	20504	587	494	42	8.5	1.3	11647|11947|12462|12464|12465|12466|13006|13205|13627|13629|14211|14678|14683|14693|14828|15516|15526|15528|19179|19330|19687|19718|20586|20624|21454|22145|22152|24015|24061|67089|67459|67951|69237|69716|70099|71819|73710|74143|93762|106344|224742|229363	Alpl|Atp5b|Cct3|Cct4|Cct5|Cct6a|Smc3|Ddx3x|Eef1a1|Eef2|Smc2|Gnai2|Gnas|Gnb2|Hspa5|Hsp90ab1|Hspa9|Hspe1|Psmc1|Rab18|Rfc1|Rfc2|Smarca4|Eftud2|Tcp1|Tuba4a|Tubb3|Abce1|Smc1a|Psmc6|Nvl|Tubb6|Gtpbp4|Trip13|Smc4|Kif23|Tubb2b|Opa1|Smarca5|Rfc4|Abcf1|Gmps	-8.1
D4	KEGG Pathway	24	mmu03030	DNA replication		-9.2	12	11	20504	37	494	11	2.2	0.66	16881|17215|17216|17218|17220|18538|19687|19718|68275|69263|106344	Lig1|Mcm3|Mcm2|Mcm5|Mcm7|Pcna|Rfc1|Rfc2|Rpa1|Rfc3|Rfc4	-7.8
D4	GO Molecular Functions	21	GO:0003697	single-stranded DNA binding		-9	6.1	8.9	20504	123	494	18	3.6	0.84	12785|14211|15382|16952|17215|17216|17218|17220|17975|19205|22608|50926|53379|56449|68275|70099|72416|227656	Cnbp|Smc2|Hnrnpa1|Anxa1|Mcm3|Mcm2|Mcm5|Mcm7|Ncl|Ptbp1|Ybx1|Hnrnpdl|Hnrnpa2b1|Ybx3|Rpa1|Smc4|Lrpprc|Rexo4	-7.7
D4	Reactome Gene Sets	6	R-MMU-3000171	Non-integrin membrane-ECM interactions		-9	12	11	20504	38	494	11	2.2	0.66	12814|12824|12825|12826|12827|12831|12832|12842|12843|14268|15530	Col11a1|Col2a1|Col3a1|Col4a1|Col4a2|Col5a1|Col5a2|Col1a1|Col1a2|Fn1|Hspg2	-7.7
D4	Reactome Gene Sets	6	R-MMU-216083	Integrin cell surface interactions		-9	8.3	9.6	20504	70	494	14	2.8	0.75	12822|12824|12825|12826|12827|12831|12832|12833|12834|12842|12843|14118|14268|15530	Col18a1|Col2a1|Col3a1|Col4a1|Col4a2|Col5a1|Col5a2|Col6a1|Col6a2|Col1a1|Col1a2|Fbn1|Fn1|Hspg2	-7.7
D4	GO Biological Processes	19	GO:0000819	sister chromatid segregation	19_GO:0009987 cellular process	-9	4.9	8.3	20504	188	494	22	4.5	0.93	12237|13006|14211|16319|17222|20877|21973|24010|24061|26914|26934|51792|52276|54392|69716|70099|71514|71819|100710|210711|215387|268697	Bub3|Smc3|Smc2|Incenp|Anapc1|Aurkb|Top2a|Ik|Smc1a|Macroh2a1|Racgap1|Ppp2r1a|Cdca8|Ncapg|Trip13|Smc4|Sfpq|Kif23|Pds5b|Mcmbp|Ncaph|Ccnb1	-7.7
D4	Reactome Gene Sets	6	R-MMU-68877	Mitotic Prometaphase		-9	4.9	8.3	20504	188	494	22	4.5	0.93	12237|13006|14211|16319|20877|22145|22152|22627|22628|24061|51792|52276|54392|59015|67951|70099|73710|75786|100710|215387|226747|268697	Bub3|Smc3|Smc2|Incenp|Aurkb|Tuba4a|Tubb3|Ywhae|Ywhag|Smc1a|Ppp2r1a|Cdca8|Ncapg|Nup160|Tubb6|Smc4|Tubb2b|Ckap5|Pds5b|Ncaph|Ahctf1|Ccnb1	-7.7
D4	GO Biological Processes	19	GO:0030199	collagen fibril organization	19_GO:0009987 cellular process	-8.9	9.1	9.8	20504	59	494	13	2.6	0.72	12406|12814|12818|12824|12825|12831|12832|12842|12843|18451|26433|100952|234407	Serpinh1|Col11a1|Col14a1|Col2a1|Col3a1|Col5a1|Col5a2|Col1a1|Col1a2|P4ha1|Plod3|Emilin1|Colgalt1	-7.6
D4	GO Biological Processes	19	GO:0000463	maturation of LSU-rRNA from tricistronic rRNA transcript (SSU-rRNA, 5.8S rRNA, LSU-rRNA)	19_GO:0008152 metabolic process	-8.9	21	12	20504	16	494	8	1.6	0.57	19989|56095|64934|66229|66942|67949|69237|74035	Rpl7|Ftsj3|Pes1|Rpl7l1|Ddx18|Nifk|Gtpbp4|Nol9	-7.6
D4	GO Biological Processes	19	GO:0006281	DNA repair	19_GO:0050896 response to stimulus	-8.9	3.1	7.4	20504	496	494	37	7.5	1.2	11545|12572|13006|14211|14375|14897|15289|15364|16881|17215|17216|17218|17220|17688|18538|19687|19718|20833|22594|22596|24061|27050|28000|51869|53610|57320|68077|68275|69263|69716|70099|71514|100710|106344|170787|227656|233908	Parp1|Cdk7|Smc3|Smc2|Xrcc6|Trip12|Hmgb1|Hmga2|Lig1|Mcm3|Mcm2|Mcm5|Mcm7|Msh6|Pcna|Rfc1|Rfc2|Ssrp1|Xrcc1|Xrcc5|Smc1a|Rps3|Prpf19|Rif1|Nono|Park7|Nop53|Rpa1|Rfc3|Trip13|Smc4|Sfpq|Pds5b|Rfc4|Hdac10|Rexo4|Fus	-7.6
D4	Reactome Gene Sets	6	R-MMU-2995410	Nuclear Envelope (NE) Reassembly		-8.8	9	9.7	20504	60	494	13	2.6	0.72	22145|22152|22367|51792|59015|67951|71805|73710|98386|100088|170762|226747|268697	Tuba4a|Tubb3|Vrk1|Ppp2r1a|Nup160|Tubb6|Nup93|Tubb2b|Lbr|Rcc1|Nup155|Ahctf1|Ccnb1	-7.5
D4	GO Biological Processes	19	GO:0034250	positive regulation of cellular amide metabolic process	19_GO:0048518 positive regulation of biological process	-8.8	5.2	8.4	20504	159	494	20	4	0.89	11991|12785|13205|13629|14265|15388|16210|16341|16418|18746|20091|20218|22352|55944|67941|68134|76846|98956|224742|100503670	Hnrnpd|Cnbp|Ddx3x|Eef2|Fmr1|Hnrnpl|Impact|Eif3e|Eif6|Pkm|Rps3a1|Khdrbs1|Vim|Eif3d|Rps27l|Upf3b|Rps9|Nat10|Abcf1|Rpl5	-7.5
D4	GO Molecular Functions	21	GO:0031491	nucleosome binding		-8.8	10	10	20504	50	494	12	2.4	0.69	15364|15441|20833|22367|26914|50709|56702|74022|80838|93762|100088|243529	Hmga2|Hp1bp3|Ssrp1|Vrk1|Macroh2a1|H1f4|H1f5|Glyr1|H1f1|Smarca5|Rcc1|H1f10	-7.4
D4	Reactome Gene Sets	6	R-MMU-69620	Cell Cycle Checkpoints		-8.6	4	7.8	20504	270	494	26	5.3	1	12237|16319|17215|17216|17218|17220|17222|19179|19718|20877|21762|22123|22627|22628|22631|51792|52276|59015|67089|68275|69077|69263|75786|106344|226747|268697	Bub3|Incenp|Mcm3|Mcm2|Mcm5|Mcm7|Anapc1|Psmc1|Rfc2|Aurkb|Psmd2|Psmd3|Ywhae|Ywhag|Ywhaz|Ppp2r1a|Cdca8|Nup160|Psmc6|Rpa1|Psmd11|Rfc3|Ckap5|Rfc4|Ahctf1|Ccnb1	-7.3
D4	GO Biological Processes	19	GO:0015931	nucleobase-containing compound transport	19_GO:0051179 localization	-8.6	4.7	8.1	20504	196	494	22	4.5	0.93	11739|14265|15382|16549|20218|22608|23881|53319|53379|59015|66511|71805|72416|110809|140486|140488|170762|225027|226747|229279|231386|331401	Slc25a4|Fmr1|Hnrnpa1|Khsrp|Khdrbs1|Ybx1|G3bp2|Nxf1|Hnrnpa2b1|Nup160|Chtop|Nup93|Lrpprc|Srsf1|Igf2bp1|Igf2bp3|Nup155|Srsf7|Ahctf1|Hnrnpa3|Ythdc1|Thoc2	-7.3
D4	Reactome Gene Sets	6	R-MMU-2467813	Separation of Sister Chromatids		-8.5	4.8	8.1	20504	181	494	21	4.3	0.91	12237|13006|16319|17222|19179|20877|21762|22123|22145|22152|24061|51792|52276|59015|67089|67951|69077|73710|75786|100710|226747	Bub3|Smc3|Incenp|Anapc1|Psmc1|Aurkb|Psmd2|Psmd3|Tuba4a|Tubb3|Smc1a|Ppp2r1a|Cdca8|Nup160|Psmc6|Tubb6|Psmd11|Tubb2b|Ckap5|Pds5b|Ahctf1	-7.2
D4	GO Molecular Functions	21	GO:0048407	platelet-derived growth factor binding		-8.5	24	13	20504	12	494	7	1.4	0.53	12824|12825|12826|12831|12833|12842|12843	Col2a1|Col3a1|Col4a1|Col5a1|Col6a1|Col1a1|Col1a2	-7.2
D4	KEGG Pathway	24	ko04974	Protein digestion and absorption		-8.4	6.9	8.8	20504	90	494	15	3	0.77	12814|12818|12819|12822|12824|12825|12826|12827|12831|12832|12833|12834|12835|12842|12843	Col11a1|Col14a1|Col15a1|Col18a1|Col2a1|Col3a1|Col4a1|Col4a2|Col5a1|Col5a2|Col6a1|Col6a2|Col6a3|Col1a1|Col1a2	-7.1
D4	GO Molecular Functions	21	GO:0008135	translation factor activity, RNA binding		-8.4	6.9	8.8	20504	90	494	15	3	0.77	13627|13629|13669|13681|16341|16418|27979|53356|54709|55944|56347|66085|217715|223691|225363	Eef1a1|Eef2|Eif3a|Eif4a1|Eif3e|Eif6|Eif3b|Eif3g|Eif3i|Eif3d|Eif3c|Eif3f|Eif2b2|Eif3l|Etf1	-7.1
D4	Reactome Gene Sets	6	R-MMU-1474228	Degradation of the extracellular matrix		-8.4	5.9	8.5	20504	119	494	17	3.4	0.82	12814|12819|12822|12824|12825|12826|12827|12831|12832|12833|12834|12842|12843|14118|14119|14268|15530	Col11a1|Col15a1|Col18a1|Col2a1|Col3a1|Col4a1|Col4a2|Col5a1|Col5a2|Col6a1|Col6a2|Col1a1|Col1a2|Fbn1|Fbn2|Fn1|Hspg2	-7.1
D4	GO Molecular Functions	21	GO:0003730	mRNA 3'-UTR binding		-8.3	6.3	8.5	20504	106	494	16	3.2	0.8	11991|12465|14265|15381|15382|15388|16201|16549|53379|56449|74326|140486|140488|216766|233908|100503670	Hnrnpd|Cct5|Fmr1|Hnrnpc|Hnrnpa1|Hnrnpl|Ilf3|Khsrp|Hnrnpa2b1|Ybx3|Hnrnpr|Igf2bp1|Igf2bp3|Gemin5|Fus|Rpl5	-7
D4	GO Biological Processes	19	GO:0006974	cellular response to DNA damage stimulus	19_GO:0050896 response to stimulus	-8.2	2.5	6.8	20504	771	494	47	9.5	1.3	11545|12412|12417|12572|13006|14211|14265|14375|14897|15289|15364|15502|16881|17215|17216|17218|17220|17688|17999|18538|19687|19718|20833|21973|22385|22594|22596|24061|27050|28000|51869|53610|57320|67941|68077|68275|69263|69716|70099|71514|100710|106344|170787|227656|231380|233908|241627	Parp1|Cbx1|Cbx3|Cdk7|Smc3|Smc2|Fmr1|Xrcc6|Trip12|Hmgb1|Hmga2|Dnaja1|Lig1|Mcm3|Mcm2|Mcm5|Mcm7|Msh6|Nedd4|Pcna|Rfc1|Rfc2|Ssrp1|Top2a|Baz1b|Xrcc1|Xrcc5|Smc1a|Rps3|Prpf19|Rif1|Nono|Park7|Rps27l|Nop53|Rpa1|Rfc3|Trip13|Smc4|Sfpq|Pds5b|Rfc4|Hdac10|Rexo4|Uba6|Fus|Wdr76	-7
D4	KEGG Pathway	24	mmu04974	Protein digestion and absorption		-8.2	6.7	8.6	20504	93	494	15	3	0.77	12814|12818|12819|12822|12824|12825|12826|12827|12831|12832|12833|12834|12835|12842|12843	Col11a1|Col14a1|Col15a1|Col18a1|Col2a1|Col3a1|Col4a1|Col4a2|Col5a1|Col5a2|Col6a1|Col6a2|Col6a3|Col1a1|Col1a2	-7
D4	Reactome Gene Sets	6	R-MMU-419037	NCAM1 interactions		-8.2	17	11	20504	19	494	8	1.6	0.57	12824|12825|12826|12827|12831|12832|12833|12834	Col2a1|Col3a1|Col4a1|Col4a2|Col5a1|Col5a2|Col6a1|Col6a2	-6.9
D4	GO Biological Processes	19	GO:0032204	regulation of telomere maintenance	19_GO:0008152 metabolic process	-8.2	7.3	8.8	20504	80	494	14	2.8	0.75	11545|11991|12462|12464|12465|12466|16905|20877|21454|22594|22596|30877|53379|98956	Parp1|Hnrnpd|Cct3|Cct4|Cct5|Cct6a|Lmna|Aurkb|Tcp1|Xrcc1|Xrcc5|Gnl3|Hnrnpa2b1|Nat10	-6.9
D4	GO Biological Processes	19	GO:0075525	viral translational termination-reinitiation	19_GO:0016032 viral process	-8.1	42	14	20504	5	494	5	1	0.45	13669|27979|53356|55944|223691	Eif3a|Eif3b|Eif3g|Eif3d|Eif3l	-6.8
D4	GO Biological Processes	19	GO:1901607	alpha-amino acid biosynthetic process	19_GO:0008152 metabolic process	-8.1	8.7	9.2	20504	57	494	12	2.4	0.69	13361|14645|26432|26433|27053|56454|57320|69719|104923|108037|108156|236539	Dhfr|Glul|Plod2|Plod3|Asns|Aldh18a1|Park7|Cad|Adi1|Shmt2|Mthfd1|Phgdh	-6.8
D4	GO Molecular Functions	21	GO:0003678	DNA helicase activity		-8.1	7.8	8.9	20504	69	494	13	2.6	0.72	13205|14375|16952|17215|17216|17218|17220|19718|22596|27041|69263|106344|107932	Ddx3x|Xrcc6|Anxa1|Mcm3|Mcm2|Mcm5|Mcm7|Rfc2|Xrcc5|G3bp1|Rfc3|Rfc4|Chd4	-6.8
D4	GO Molecular Functions	21	GO:0140098	catalytic activity, acting on RNA		-8	3.3	7.2	20504	373	494	30	6.1	1.1	11834|13204|13205|13681|14113|17454|27041|27225|52513|56095|56200|64424|66254|66942|67040|67619|67724|67755|69663|70223|71990|74351|78394|107271|110109|226414|228889|231329|234734|320632	Aqr|Dhx15|Ddx3x|Eif4a1|Fbl|Mov10|G3bp1|Ddx24|Ddx56|Ftsj3|Ddx21|Polr1e|Dimt1|Ddx18|Ddx17|Nob1|Pop1|Ddx47|Ddx51|Nars|Ddx54|Ddx23|Ddx52|Yars|Nop2|Dars|Ddx27|Polr2b|Aars|Snrnp200	-6.8
D4	GO Biological Processes	19	GO:0000070	mitotic sister chromatid segregation	19_GO:0009987 cellular process	-8	5	7.9	20504	159	494	19	3.8	0.87	12237|13006|14211|16319|17222|20877|24010|24061|26914|26934|51792|52276|54392|69716|70099|71819|100710|215387|268697	Bub3|Smc3|Smc2|Incenp|Anapc1|Aurkb|Ik|Smc1a|Macroh2a1|Racgap1|Ppp2r1a|Cdca8|Ncapg|Trip13|Smc4|Kif23|Pds5b|Ncaph|Ccnb1	-6.7
D4	GO Biological Processes	19	GO:0000028	ribosomal small subunit assembly	19_GO:0009987 cellular process	-8	17	11	20504	20	494	8	1.6	0.57	16785|20044|20054|20085|20103|22596|54127|67941	Rpsa|Rps14|Rps15|Rps19|Rps5|Xrcc5|Rps28|Rps27l	-6.7
D4	GO Molecular Functions	21	GO:0003727	single-stranded RNA binding		-8	6.4	8.4	20504	97	494	15	3	0.77	11834|12785|13205|14265|15289|15381|15382|16201|16952|19655|20218|20462|20744|50926|381591	Aqr|Cnbp|Ddx3x|Fmr1|Hmgb1|Hnrnpc|Hnrnpa1|Ilf3|Anxa1|Rbmx|Khdrbs1|Tra2b|Strbp|Hnrnpdl|L1td1	-6.7
D4	GO Biological Processes	19	GO:0006333	chromatin assembly or disassembly	19_GO:0009987 cellular process	-8	5.6	8.1	20504	127	494	17	3.4	0.82	15289|15441|17216|20586|20588|22385|26914|50709|50927|56086|56702|75751|80838|93762|107435|108671|243529	Hmgb1|Hp1bp3|Mcm2|Smarca4|Smarcc1|Baz1b|Macroh2a1|H1f4|Nasp|Set|H1f5|Ipo4|H1f1|Smarca5|Hat1|Dnajc9|H1f10	-6.7
D4	Reactome Gene Sets	6	R-MMU-6782210	Gap-filling DNA repair synthesis and ligation in TC-NER		-7.9	8.4	9	20504	59	494	12	2.4	0.69	11834|12572|16881|18538|19687|19718|22594|28000|68275|69263|106344|231329	Aqr|Cdk7|Lig1|Pcna|Rfc1|Rfc2|Xrcc1|Prpf19|Rpa1|Rfc3|Rfc4|Polr2b	-6.6
D4	GO Biological Processes	19	GO:0007059	chromosome segregation	19_GO:0009987 cellular process	-7.8	3.4	7.1	20504	338	494	28	5.7	1	12237|13006|13205|14211|16319|17222|20877|21973|23825|24010|24061|26914|26934|27050|51792|52276|54392|69716|70099|71514|71819|77053|100088|100710|210711|215387|218977|268697	Bub3|Smc3|Ddx3x|Smc2|Incenp|Anapc1|Aurkb|Top2a|Banf1|Ik|Smc1a|Macroh2a1|Racgap1|Rps3|Ppp2r1a|Cdca8|Ncapg|Trip13|Smc4|Sfpq|Kif23|Sun1|Rcc1|Pds5b|Mcmbp|Ncaph|Dlgap5|Ccnb1	-6.6
D4	GO Biological Processes	19	GO:0033119	negative regulation of RNA splicing	19_GO:0048519 negative regulation of biological process	-7.8	13	10	20504	29	494	9	1.8	0.6	14105|15388|19205|20462|53379|56195|68052|108014|225027	Srsf10|Hnrnpl|Ptbp1|Tra2b|Hnrnpa2b1|Ptbp2|Rps13|Srsf9|Srsf7	-6.6
D4	GO Molecular Functions	21	GO:0003743	translation initiation factor activity		-7.7	8.2	8.8	20504	61	494	12	2.4	0.69	13669|13681|16341|16418|27979|53356|54709|55944|56347|66085|217715|223691	Eif3a|Eif4a1|Eif3e|Eif6|Eif3b|Eif3g|Eif3i|Eif3d|Eif3c|Eif3f|Eif2b2|Eif3l	-6.5
D4	Reactome Gene Sets	6	R-MMU-2500257	Resolution of Sister Chromatid Cohesion		-7.7	5.7	8	20504	117	494	16	3.2	0.8	12237|13006|16319|20877|22145|22152|24061|51792|52276|59015|67951|73710|75786|100710|226747|268697	Bub3|Smc3|Incenp|Aurkb|Tuba4a|Tubb3|Smc1a|Ppp2r1a|Cdca8|Nup160|Tubb6|Tubb2b|Ckap5|Pds5b|Ahctf1|Ccnb1	-6.4
D4	GO Biological Processes	19	GO:1903047	mitotic cell cycle process	19_GO:0009987 cellular process	-7.7	2.5	6.5	20504	701	494	43	8.7	1.3	12237|12631|13006|13205|14211|15364|16319|16551|16800|16881|16906|16952|17215|17216|17222|18538|18571|20104|20877|24010|24061|26914|26934|28036|50927|51792|52276|54392|66515|67300|67941|68077|69716|70099|71819|75786|77579|100088|100710|192176|215387|218977|268697	Bub3|Cfl1|Smc3|Ddx3x|Smc2|Hmga2|Incenp|Kif11|Arhgef2|Lig1|Lmnb1|Anxa1|Mcm3|Mcm2|Anapc1|Pcna|Pdcd6ip|Rps6|Aurkb|Ik|Smc1a|Macroh2a1|Racgap1|Larp7|Nasp|Ppp2r1a|Cdca8|Ncapg|Cul7|Cltc|Rps27l|Nop53|Trip13|Smc4|Kif23|Ckap5|Myh10|Rcc1|Pds5b|Flna|Ncaph|Dlgap5|Ccnb1	-6.4
[truncated: 5,984 more rows]
