# Supplementary material for: Epigenetic mechanisms of Strip2 in differentiation of pluripotent stem cells
Source: Cell Death Discov. 2022 Nov 5;8:447. doi: 10.1038/s41420-022-01237-5 (PMC9637104; doi:10.1038/s41420-022-01237-5)
Supplement: Supplementary file 14 — Table S5 [file 41420_2022_1237_MOESM14_ESM.xlsx]

## Sheet: ESCs
ProteinIDs	Protein.names	Gene.names	log2 Ratio H/L D0_01	log2 Ratio H/L D0_02	log2 Ratio H/L D0_03	p-val D0	Adjusted p-val (BH)	log2FC_D0	Sign p-val: 0.05 log2FC: 0.58
Q04857	Collagen alpha-1(VI) chain	Col6a1	2.99747	3.88328	3.57618	0.005505	0.038395	3.48564	+
Q80ZW2	Protein THEM6	Them6	2.1579	2.06678	2.08614	0.000174	0.017329	2.10361	+
Q9CYL5	Golgi-associated plant pathogenesis-related protein 1	Glipr2	2.0761	2.13167	2.00841	0.000296	0.017396	2.07206	+
B1AR46	Claudin;Claudin-7	Cldn7	NA	2.04129	2.0474	0.000951	0.021824	2.04435	+
Q8BGT5	Alanine aminotransferase 2	Gpt2	2.04842	1.94373	2.03122	0.000261	0.017329	2.00779	+
B1ARD6		Slfn9	1.24171	2.46548	1.65175	0.038222	0.101908	1.78631	+
Q62093	Serine/arginine-rich splicing factor 2	Srsf2	1.70054	1.7339	1.922	0.001487	0.024611	1.78548	+
Q78IQ7	Zinc transporter ZIP4	Slc39a4	1.89483	1.54694	1.89063	0.004179	0.034279	1.77747	+
Q8CF02	Protein FAM25C	Fam25c	1.72525	1.90361	1.63191	0.002059	0.028258	1.75359	+
Q9ERG0	LIM domain and actin-binding protein 1	Lima1	1.62825	1.70533	1.66971	0.000178	0.017329	1.66776	+
G3XA21		Mroh1	1.64518	NA	1.65338	0.001582	0.025228	1.64928	+
Q8R0W0	Epiplakin	Eppk1	1.9533	1.64727	1.3368	0.011492	0.052283	1.64579	+
H7BX95	Serine/arginine-rich splicing factor 1	Srsf1	1.7228	1.64127	1.56122	0.000806	0.021256	1.64176	+
Q9CQU0	Thioredoxin domain-containing protein 12	Txndc12	1.42085	1.68031	1.76021	0.003972	0.033452	1.62045	+
P11688	Integrin alpha-5;Integrin alpha-5 heavy chain;Integrin alpha-5 light chain	Itga5	1.50827	1.71765	1.56506	0.001529	0.024769	1.597	+
Q3TLP5	Enoyl-CoA hydratase domain-containing protein 2, mitochondrial	Echdc2	1.6151	1.57443	1.58303	6e-05	0.017329	1.59085	+
Q9D7V9	N-acylethanolamine-hydrolyzing acid amidase;N-acylethanolamine-hydrolyzing acid amidase subunit alpha;N-acylethanolamine-hydrolyzing acid amidase subunit beta	Naaa	1.39929	1.6324	NA	0.048856	0.119589	1.51585	+
P08226	Apolipoprotein E	Apoe	1.55498	1.51045	1.47785	0.000218	0.017329	1.51443	+
Q8VCW8	Acyl-CoA synthetase family member 2, mitochondrial	Acsf2	1.42816	1.52253	1.5895	0.000955	0.021824	1.5134	+
Q8C3X8	Lipase maturation factor 2	Lmf2	1.55319	1.46037	1.48781	0.000336	0.017458	1.50046	+
E9Q7U2	Calcium-binding and coiled-coil domain-containing protein 1	Calcoco1	1.68684	1.54249	1.26048	0.006926	0.042166	1.4966	+
P10630	Eukaryotic initiation factor 4A-II;Eukaryotic initiation factor 4A-II, N-terminally processed	Eif4a2	1.46162	1.48256	1.53542	0.000216	0.017329	1.4932	+
P52825	Carnitine O-palmitoyltransferase 2, mitochondrial	Cpt2	1.39867	1.54146	1.49997	0.00082	0.021479	1.48003	+
Q4FK66	Pre-mRNA-splicing factor 38A	Prpf38a	NA	1.44196	1.50185	0.012949	0.054811	1.47191	+
Q8K354	Carbonyl reductase [NADPH] 3	Cbr3	1.46574	1.43201	1.44545	4.6e-05	0.017329	1.44773	+
P84104	Serine/arginine-rich splicing factor 3	Srsf3;Gm12355	1.49167	1.77825	0.948778	0.028638	0.085447	1.40623	+
Q9D1M7	Peptidyl-prolyl cis-trans isomerase FKBP11	Fkbp11	1.3379	1.29431	1.52183	0.002526	0.028735	1.38468	+
Q8R2Q8	Bone marrow stromal antigen 2	Bst2	1.3585	1.46443	1.32471	0.000925	0.021824	1.38255	+
G3UYN0	LINE-1 type transposase domain-containing protein 1	L1td1	1.45307	1.60784	1.0539	0.014167	0.057711	1.37161	+
Q9DCN2	NADH-cytochrome b5 reductase 3;NADH-cytochrome b5 reductase 3 membrane-bound form;NADH-cytochrome b5 reductase 3 soluble form;NADH-cytochrome b5 reductase	Cyb5r3	1.36543	1.35695	1.36204	3e-06	0.008031	1.36147	+
Q9WUR9	Adenylate kinase 4, mitochondrial	Ak4	1.39221	1.33146	1.35868	0.000167	0.017329	1.36078	+
P32037	Solute carrier family 2, facilitated glucose transporter member 3	Slc2a3	1.31912	1.34928	1.37205	0.00013	0.017329	1.34682	+
F6XC25	Coiled-coil and C2 domain-containing protein 1B	Cc2d1b	1.35897	NA	1.32024	0.009202	0.046814	1.33961	+
Q91VC9	Growth hormone-inducible transmembrane protein	Ghitm	1.26523	1.3034	1.42854	0.001368	0.023985	1.33239	+
Q99J56	Derlin-1	Derl1	1.3028	1.37061	1.31429	0.000248	0.017329	1.32923	+
P29416	Beta-hexosaminidase subunit alpha	Hexa	1.51119	0.947511	1.46656	0.018587	0.066707	1.30842	+
Q9Z2Z6	Mitochondrial carnitine/acylcarnitine carrier protein	Slc25a20	1.28139	1.34779	1.28767	0.000263	0.017329	1.30562	+
Q9D0F9	Phosphoglucomutase-1	Pgm1	1.34006	1.22379	1.28519	0.000684	0.019658	1.28302	+
Q3THK3	General transcription factor IIF subunit 1	Gtf2f1	NA	1.25902	1.2968	0.009408	0.047058	1.27791	+
P42567	Epidermal growth factor receptor substrate 15	Eps15	1.18576	NA	1.36346	0.044306	0.111776	1.27461	+
Q8BH04	Phosphoenolpyruvate carboxykinase [GTP], mitochondrial	Pck2	1.20722	1.23504	1.37481	0.001657	0.025673	1.27236	+
O35054	Claudin-4	Cldn4	1.3505	1.14623	1.22102	0.00231	0.028735	1.23925	+
P16045	Galectin-1	Lgals1	1.15126	1.25869	1.27046	0.000954	0.021824	1.2268	+
Q9DCC4	Pyrroline-5-carboxylate reductase 3	Pycrl	1.16929	1.20918	1.27478	0.000637	0.01904	1.21775	+
Q6P9J9	Anoctamin-6	Ano6	1.11115	1.17694	1.35911	0.0037	0.032522	1.21574	+
Q9R1J0	Sterol-4-alpha-carboxylate 3-dehydrogenase, decarboxylating	Nsdhl	1.27689	1.07359	1.2269	0.00262	0.028961	1.19246	+
O55100	Synaptogyrin-1	Syngr1	1.1445	1.30639	1.0911	0.002992	0.030166	1.18066	+
Q8BR90	UPF0600 protein C5orf51 homolog		1.04842	1.27521	1.21235	0.003273	0.031286	1.17866	+
Q8VCN5	Cystathionine gamma-lyase	Cth	1.06274	1.18874	1.28	0.00285	0.030166	1.17716	+
P21460	Cystatin-C	Cst3	0.791894	1.23428	1.48689	0.02879	0.085775	1.17102	+
Q8R0A0	General transcription factor IIF subunit 2	Gtf2f2	0.991523	1.25141	1.26962	0.005833	0.039549	1.17085	+
G3X9H7	Metastasis suppressor protein 1	Mtss1	1.31872	0.950719	1.22651	0.00888	0.046117	1.16532	+
Q91W43	Glycine dehydrogenase (decarboxylating), mitochondrial	Gldc	1.13762	1.1631	1.18385	0.000132	0.017329	1.16152	+
Q923D2	Flavin reductase (NADPH)	Blvrb	1.14359	1.11789	1.21401	0.000615	0.01904	1.15849	+
Q8K010	5-oxoprolinase	Oplah	1.12496	NA	1.18787	0.017313	0.0639	1.15641	+
Q8VCH6	Delta(24)-sterol reductase	Dhcr24	1.14652	1.19372	1.12509	0.000308	0.017396	1.15511	+
Q9ESU7	Amino acid transporter;Neutral amino acid transporter B(0)	Slc1a5	0.946747	1.25827	1.25734	0.007975	0.044429	1.15412	+
O88307	Sortilin-related receptor	Sorl1	1.1218	1.09609	1.22784	0.00123	0.023629	1.14858	+
P19324	Serpin H1	Serpinh1	1.12208	1.06645	1.24935	0.002224	0.028735	1.14596	+
E9Q5C9		Nolc1	1.22543	1.25166	0.929093	0.008196	0.044501	1.1354	+
P05214	Tubulin alpha-3 chain	Tuba3a	1.19657	0.918955	1.28947	0.00948	0.047169	1.135	+
P10833	Ras-related protein R-Ras	Rras	NA	1.16051	1.0547	0.030386	0.087889	1.1076	+
Q80U72	Protein scribble homolog	Scrib	1.09428	1.04037	1.16109	0.001009	0.021824	1.09858	+
Q9JII6	Alcohol dehydrogenase [NADP(+)]	Akr1a1	1.09134	1.03852	1.1456	0.000801	0.02125	1.09182	+
P10649	Glutathione S-transferase Mu 1	Gstm1	1.07067	1.01746	1.13797	0.00105	0.021824	1.07536	+
P09242	Alkaline phosphatase, tissue-nonspecific isozyme	Alpl	1.00116	1.05303	1.15575	0.001797	0.026176	1.06998	+
Q569Z6	Thyroid hormone receptor-associated protein 3	Thrap3	0.891834	1.37068	0.915657	0.02095	0.071259	1.05939	+
Q9DBE0	Cysteine sulfinic acid decarboxylase	Csad	NA	0.979673	1.12794	0.044712	0.11217	1.05381	+
P47857	ATP-dependent 6-phosphofructokinase, muscle type	Pfkm	1.00913	0.971139	1.17397	0.003487	0.0319	1.05141	+
P52019	Squalene monooxygenase	Sqle	NA	1.06445	1.02853	0.010923	0.050741	1.04649	+
Q9D495	Synaptonemal complex central element protein 1	Syce1	0.980484	0.980989	1.15073	0.00297	0.030166	1.0374	+
M0QWP1	Agrin;Agrin N-terminal 110 kDa subunit;Agrin C-terminal 110 kDa subunit;Agrin C-terminal 90 kDa fragment;Agrin C-terminal 22 kDa fragment	Agrn	1.01886	0.979065	1.11133	0.001426	0.024272	1.03642	+
P11404	Fatty acid-binding protein, heart	Fabp3	0.963039	1.00826	1.13588	0.002487	0.028735	1.03573	+
H3BL37	Treacle protein	Tcof1	1.01946	1.06502	1.01536	0.000237	0.017329	1.03328	+
Q9D0R2	Threonine--tRNA ligase, cytoplasmic	Tars	0.983661	1.00716	1.09307	0.001045	0.021824	1.02797	+
P57787	Monocarboxylate transporter 4	Slc16a3	0.948846	1.03062	1.09488	0.001696	0.025673	1.02478	+
Q9QYB1	Chloride intracellular channel protein 4	Clic4	0.906921	1.04076	1.12164	0.003724	0.032587	1.02311	+
P52760	Ribonuclease UK114	Hrsp12	1.03396	1.00308	1.01853	7.7e-05	0.017329	1.01853	+
A2A8R7	Terminal uridylyltransferase 4	Zcchc11	0.986627	0.881714	1.15986	0.006393	0.040741	1.0094	+
O35621	Phosphomannomutase 1;Phosphomannomutase	Pmm1	1.08553	0.985939	0.945072	0.001716	0.025673	1.00551	+
P97765	WW domain-binding protein 2	Wbp2	0.890088	1.08493	1.02088	0.00328	0.031286	0.998632	+
E9Q456		Tpm1	1.02165	1.00865	0.956445	0.0004	0.017662	0.995583	+
P53798	Squalene synthase	Fdft1	0.891616	1.06845	0.995284	0.002701	0.029527	0.985117	+
Q8R1S9	Sodium-coupled neutral amino acid transporter 4	Slc38a4	0.703159	0.973583	1.25872	0.025833	0.080169	0.978486	+
P54731	FAS-associated factor 1	Faf1	0.976066	0.994787	0.9572	0.000124	0.017329	0.976018	+
K3W4R2	Myosin-14	Myh14	0.789319	1.23775	0.884837	0.019174	0.068068	0.970636	+
Q09143	High affinity cationic amino acid transporter 1	Slc7a1	0.97153	1.04831	0.885532	0.002348	0.028735	0.968457	+
Q80SW1	Putative adenosylhomocysteinase 2	Ahcyl1	1.14102	0.80124	0.958803	0.01015	0.049084	0.967021	+
Q99LS3	Phosphoserine phosphatase	Psph	0.851564	0.946579	1.10027	0.005578	0.03845	0.966137	+
Q920L1	Fatty acid desaturase 1	Fads1	0.826211	1.01973	1.0462	0.005134	0.03778	0.964048	+
E9Q8D0		Dnajc21	0.996605	0.903341	0.980969	0.000901	0.021824	0.960305	+
Q8VDL4	ADP-dependent glucokinase	Adpgk	0.882421	0.852253	1.10913	0.007234	0.042916	0.947934	+
F6ZFU0		Eef1d	NA	1.00209	0.884837	0.039507	0.103878	0.943462	+
O70475	UDP-glucose 6-dehydrogenase	Ugdh	0.800753	0.880195	1.11354	0.010002	0.048672	0.931495	+
P23591	GDP-L-fucose synthase	Tsta3	0.933982	0.894019	0.964823	0.000484	0.017762	0.930941	+
A2A9Q2	Nardilysin	Nrd1	0.914029	NA	0.940879	0.009214	0.046814	0.927454	+
Q9QXS1	Plectin	Plec	0.953453	0.910266	0.876779	0.00059	0.01904	0.913499	+
G3X9G4	Dynamin-2	Dnm2	0.850441	0.836567	1.04292	0.005313	0.037893	0.909976	+
P97384	Annexin A11;Annexin	Anxa11	0.926971	0.866566	0.920408	0.000447	0.017662	0.904648	+
Q8C5H8	NAD kinase 2, mitochondrial	Nadk2	0.996199	0.855679	0.860828	0.002579	0.028735	0.904235	+
P18155	Bifunctional methylenetetrahydrofolate dehydrogenase/cyclohydrolase, mitochondrial;NAD-dependent methylenetetrahydrofolate dehydrogenase;Methenyltetrahydrofolate cyclohydrolase	Mthfd2	0.863407	0.905475	0.932265	0.000495	0.01799	0.900382	+
Q61753	D-3-phosphoglycerate dehydrogenase	Phgdh	0.793413	0.866675	1.02988	0.00602	0.040015	0.896656	+
Q9JM62	Receptor expression-enhancing protein 6	Reep6	0.787326	0.822856	1.05725	0.008948	0.046117	0.889144	+
Q91V01	Lysophospholipid acyltransferase 5	Lpcat3	0.906165	0.877045	0.875581	0.000126	0.017329	0.886264	+
O70404	Vesicle-associated membrane protein 8	Vamp8	0.940431	0.763261	0.928227	0.004214	0.034307	0.877306	+
P24270	Catalase	Cat	0.84414	0.799404	0.986897	0.004132	0.034225	0.876814	+
Q64674	Spermidine synthase	Srm	0.87195	0.858987	0.89807	0.000172	0.017329	0.876336	+
Q61292	Laminin subunit beta-2	Lamb2	1.00843	0.794461	0.809593	0.006209	0.040555	0.870827	+
F6UHR6	Oxysterol-binding protein;Oxysterol-binding protein-related protein 9	Osbpl9	0.952826	0.767961	0.87638	0.003816	0.032937	0.865722	+
Q8K2T8	RNA polymerase II-associated factor 1 homolog	Paf1	0.88308	0.772061	0.923116	0.002753	0.029696	0.859419	+
Q9CYA0	Cysteine-rich with EGF-like domain protein 2	Creld2	0.778501	0.934088	0.863348	0.002732	0.029696	0.858646	+
P52480	Pyruvate kinase PKM	Pkm	0.886369	0.83231	0.837951	0.000405	0.017662	0.85221	+
Q91XC9	Peroxisomal membrane protein PEX16	Pex16	NA	0.851921	0.852026	3.9e-05	0.017329	0.851973	+
Q00612	Glucose-6-phosphate 1-dehydrogenase X;Glucose-6-phosphate 1-dehydrogenase	G6pdx	0.794581	0.852142	0.888404	0.001043	0.021824	0.845042	+
A2AWT5	Nucleolar transcription factor 1	Ubtf	0.889323	0.924859	0.715892	0.005808	0.039443	0.843358	+
Q8VC65	Nurim	Nrm	0.793997	0.815611	0.899741	0.001484	0.024611	0.836449	+
Q5EBP8	Heterogeneous nuclear ribonucleoprotein A1;Heterogeneous nuclear ribonucleoprotein A1, N-terminally processed	Hnrnpa1	1.01525	0.83556	0.657857	0.014883	0.059504	0.836224	+
P97821	Dipeptidyl peptidase 1;Dipeptidyl peptidase 1 exclusion domain chain;Dipeptidyl peptidase 1 heavy chain;Dipeptidyl peptidase 1 light chain	Ctsc	0.902162	0.846488	0.757231	0.002544	0.028735	0.835294	+
P13864	DNA (cytosine-5)-methyltransferase 1	Dnmt1	0.872171	0.843931	0.789279	0.000848	0.021824	0.835127	+
Q2Q5T5		Gm7325	0.77081	0.753579	0.980041	0.007516	0.043627	0.83481	+
Q9JHF5	V-type proton ATPase subunit a	Tcirg1	0.858614	NA	0.807187	0.019648	0.068836	0.832901	+
Q8BJS4	SUN domain-containing protein 2	Sun2	0.765698	0.782201	0.939924	0.004454	0.035024	0.829275	+
B2RY56	RNA-binding protein 25	Rbm25	0.904868	0.790886	0.775111	0.002454	0.028735	0.823622	+
Q3UDE2	Tubulin--tyrosine ligase-like protein 12	Ttll12	0.852012	0.827929	0.790444	0.000473	0.017662	0.823462	+
Q3TZX3	Solute carrier family 25 member 33	Slc25a33	0.673636	0.979876	0.813351	0.01139	0.052095	0.822288	+
P14873	Microtubule-associated protein 1B;MAP1B heavy chain;MAP1 light chain LC1	Map1b	0.708743	0.864154	0.888305	0.00467	0.03615	0.820401	+
Q3TW96	UDP-N-acetylhexosamine pyrophosphorylase-like protein 1	Uap1l1	0.814056	0.789269	0.832407	0.000237	0.017329	0.811911	+
O70579	Peroxisomal membrane protein PMP34	Slc25a17	0.636482	0.809013	0.976135	0.014437	0.058073	0.80721	+
Q8BP47	Asparagine--tRNA ligase, cytoplasmic	Nars	0.802843	0.773931	0.843169	0.000619	0.01904	0.806648	+
E9Q175	Unconventional myosin-VI	Myo6	0.768078	NA	0.843067	0.029609	0.087058	0.805572	+
Q60953	Protein PML	Pml	0.715787	0.898741	0.799735	0.004289	0.034465	0.804754	+
Q99KI0	Aconitate hydratase, mitochondrial	Aco2	0.73221	0.724256	0.946593	0.008164	0.044472	0.80102	+
Q80T06	Elongation factor 1-delta	Eef1d	0.834068	0.815043	0.748206	0.00106	0.021925	0.799106	+
Q08943	FACT complex subunit SSRP1	Ssrp1	0.850553	0.871269	0.671839	0.006237	0.040555	0.797887	+
O35379	Multidrug resistance-associated protein 1	Abcc1	0.863741	0.695928	0.827873	0.004085	0.034167	0.795847	+
Q9WVE8	Protein kinase C and casein kinase substrate in neurons protein 2	Pacsin2	0.600351	0.866675	0.918277	0.015005	0.059738	0.795101	+
Q8BL97	Serine/arginine-rich splicing factor 7	Srsf7	0.77862	0.840477	0.727113	0.001751	0.025877	0.78207	+
Q91WE3	Ribonuclease P protein subunit p25	Rpp25	0.892598	0.637035	0.811787	0.009209	0.046814	0.780473	+
Q6PIP5	NudC domain-containing protein 1	Nudcd1	0.791543	0.693954	0.850096	0.003404	0.031798	0.778531	+
Q6ZPE2	Myotubularin-related protein 5	Sbf1	0.787795	0.692595	0.852229	0.003537	0.032137	0.77754	+
Q9WV68	Peroxisomal 2,4-dienoyl-CoA reductase	Decr2	0.729038	0.737495	0.862744	0.003085	0.030589	0.776426	+
Q68FG2		Sptbn2	0.581804	0.666656	1.06261	0.035059	0.096815	0.770357	+
Q9D7S7	60S ribosomal protein L22-like 1	Rpl22l1	0.741685	0.80353	0.762316	0.000558	0.018921	0.769177	+
Q3UEB3	Poly(U)-binding-splicing factor PUF60	Puf60	0.62642	0.822404	0.843373	0.008077	0.044429	0.764066	+
Q99L47	Hsc70-interacting protein	St13	0.698301	0.776499	0.810011	0.001883	0.026562	0.761604	+
Q9CRB8	Mitochondrial fission process protein 1	Mtfp1	0.756021	NA	0.764582	0.003584	0.032179	0.760301	+
Q9JK81	UPF0160 protein MYG1, mitochondrial	Myg1	0.74483	0.669045	0.863952	0.005535	0.038434	0.759276	+
P07356	Annexin A2;Annexin	Anxa2	0.674651	0.784754	0.79963	0.002729	0.029696	0.753012	+
Q921M7	Protein FAM49B	Fam49b	0.747364	0.721351	0.786414	0.000632	0.01904	0.75171	+
O70400	PDZ and LIM domain protein 1	Pdlim1	0.824383	0.768899	0.660178	0.004097	0.034167	0.751153	+
Q62465	Synaptic vesicle membrane protein VAT-1 homolog	Vat1	0.659607	0.797107	0.796469	0.003686	0.032469	0.751061	+
O88396	GrpE protein homolog 2, mitochondrial	Grpel2	0.703904	0.758428	0.785032	0.001014	0.021824	0.749122	+
P10852	4F2 cell-surface antigen heavy chain	Slc3a2	0.715663	0.656427	0.86365	0.006768	0.042087	0.745247	+
E9Q066	La-related protein 4	Larp4	0.661017	1.00019	0.57112	0.029469	0.0869	0.744109	+
Q9Z127	Large neutral amino acids transporter small subunit 1	Slc7a5	0.68262	0.686278	0.856889	0.005951	0.039841	0.741929	+
Q9R0E2	Procollagen-lysine,2-oxoglutarate 5-dioxygenase 1	Plod1	0.718619	0.675563	0.830862	0.003873	0.033122	0.741681	+
Q8R0Y6	Cytosolic 10-formyltetrahydrofolate dehydrogenase	Aldh1l1	0.677692	0.660604	0.881162	0.009045	0.046423	0.739819	+
F8WJG3	Transformer-2 protein homolog beta	Tra2b	0.846393	0.782317	0.589377	0.010738	0.050253	0.739362	+
E9QPX1	Collagen alpha-1(XVIII) chain;Endostatin	Col18a1	0.544952	0.918849	0.745696	0.020846	0.071246	0.736499	+
B1ARB3	Platelet endothelial cell adhesion molecule	Pecam1	0.628516	0.713211	0.856383	0.008136	0.044463	0.732703	+
Q3V117		Acly	0.718988	0.643443	0.820215	0.004918	0.036669	0.727549	+
Q8JZU2	Tricarboxylate transport protein, mitochondrial	Slc25a1	0.732089	0.661993	0.7796	0.002215	0.028735	0.72456	+
Q8R1J9	Torsin-2A;Prosalusin;Salusin-beta	Tor2a	0.905841	0.661993	0.602226	0.016084	0.06177	0.723353	+
Q3U6N9	UPF0488 protein C8orf33 homolog		0.723899	0.834328	0.608728	0.008032	0.044429	0.722318	+
Q8R1L4	ER lumen protein-retaining receptor 3	Kdelr3	0.576655	0.671054	0.916434	0.019141	0.068068	0.721381	+
P70423	Cationic amino acid transporter 3	Slc7a3	0.793179	0.665649	0.70357	0.00274	0.029696	0.7208	+
P24288	Branched-chain-amino-acid aminotransferase, cytosolic;Branched-chain-amino-acid aminotransferase	Bcat1	0.780271	0.661614	0.719345	0.002254	0.028735	0.72041	+
E9PZM7		Scaf11	0.762003	0.713942	0.682722	0.001025	0.021824	0.719555	+
A2TJV2	Paralemmin-3	Palm3	0.673383	0.773814	0.70447	0.001709	0.025673	0.717222	+
Q8VC03	Echinoderm microtubule-associated protein-like 3	Eml3	NA	0.693831	0.732856	0.01741	0.064048	0.713343	+
Q8BTE5	Protein CEBPZOS	Cebpzos	0.84256	0.637677	0.656231	0.008334	0.044841	0.712156	+
E9Q7E2		Arid2	0.743258	0.684788	0.706492	0.000575	0.019025	0.711513	+
Q80WJ7	Protein LYRIC	Mtdh	0.70738	0.731612	0.690916	0.000277	0.017396	0.70997	+
P52196	Thiosulfate sulfurtransferase	Tst	0.627206	0.737495	0.760154	0.003344	0.03167	0.708285	+
D3Z0M9		Ddx23	0.680221	0.715402	0.727887	0.000406	0.017662	0.707837	+
A1BN54		Actn1	0.679337	0.653383	0.787582	0.003364	0.031746	0.706767	+
Q3UH60	Disco-interacting protein 2 homolog B	Dip2b	0.691798	NA	0.717452	0.011588	0.052512	0.704625	+
Q8R180	ERO1-like protein alpha	Ero1l	0.530589	0.629695	0.937822	0.029388	0.086787	0.699368	+
Q07113	Cation-independent mannose-6-phosphate receptor	Igf2r	0.661784	0.652493	0.782798	0.003586	0.032179	0.699025	+
Q8BG17	Nucleolar protein 12	Nol12	0.741927	0.720018	0.634564	0.002189	0.028735	0.698836	+
P97473	RISC-loading complex subunit TARBP2	Tarbp2	0.890416	0.699746	0.502561	0.024809	0.07858	0.697574	+
Q3TWW8	Serine/arginine-rich splicing factor 6	Srsf6	0.817736	0.628532	0.644091	0.007489	0.043596	0.696786	+
P28658	Ataxin-10	Atxn10	0.723899	0.773113	0.58962	0.006158	0.040555	0.695544	+
K3W4Q8	Basigin	Bsg	0.680221	0.71004	0.69375	0.000154	0.017329	0.69467	+
Q8VCL2	Protein SCO2 homolog, mitochondrial	Sco2	0.629564	0.669673	0.783756	0.004396	0.034839	0.694331	+
E9Q9Y4	Methylcytosine dioxygenase TET1	Tet1	0.78192	0.754526	0.54386	0.011558	0.052501	0.693435	+
Q9QXT0	Protein canopy homolog 2	Cnpy2	0.681737	0.662624	0.727666	0.00078	0.020929	0.690675	+
Q91WM3	U3 small nucleolar RNA-interacting protein 2	Rrp9	0.881432	0.729686	0.434652	0.035063	0.096815	0.681923	+
P70441	Na(+)/H(+) exchange regulatory cofactor NHE-RF1	Slc9a3r1	0.483495	0.708329	0.853547	0.024033	0.077313	0.68179	+
P20060	Beta-hexosaminidase subunit beta	Hexb	0.671986	0.670301	0.702332	0.000233	0.017329	0.68154	+
O08582	GTP-binding protein 1	Gtpbp1	0.744588	0.634721	0.65925	0.002392	0.028735	0.67952	+
B9EJX5	Transcription initiation factor TFIID subunit 2	Taf2	0.649447	NA	0.707502	0.02722	0.082998	0.678475	+
P63101	14-3-3 protein zeta/delta	Ywhaz	0.708372	0.844265	0.481459	0.023505	0.076603	0.678032	+
Q99MU3	Double-stranded RNA-specific adenosine deaminase	Adar	0.66498	NA	0.687963	0.010813	0.050428	0.676471	+
Q9CYN9	Renin receptor	Atp6ap2	0.750256	0.690616	0.58401	0.00515	0.03778	0.674961	+
Q76LV0	Glutathione peroxidase;Phospholipid hydroperoxide glutathione peroxidase, mitochondrial;Phospholipid hydroperoxide glutathione peroxidase, nuclear	Gpx4	0.609933	0.68093	0.722568	0.002392	0.028735	0.671144	+
Q99JW2	Aminoacylase-1	Acy1	0.704898	0.52642	0.780134	0.012358	0.053871	0.670484	+
Q9D938	Transmembrane protein 160	Tmem160	0.684888	0.730409	0.583643	0.004211	0.034307	0.666313	+
G3X934	WD repeat-containing protein 70	Wdr70	0.685644	0.610983	0.697144	0.001647	0.025673	0.66459	+
Q3UH70	Bromodomain-containing protein 4	Brd4	0.642201	0.631372	0.717118	0.001647	0.025673	0.663564	+
A2AMH5	Choline transporter-like protein 1	Slc44a1	0.719972	0.631759	0.635626	0.001882	0.026562	0.662452	+
P61327	Protein mago nashi homolog	Magoh	0.742532	0.582187	0.656812	0.004883	0.036594	0.66051	+
Q9D880	Mitochondrial import inner membrane translocase subunit TIM50	Timm50	0.66268	0.642547	0.666886	0.000131	0.017329	0.657371	+
E9PW03	Glycosylphosphatidylinositol anchor attachment 1 protein	Gpaa1	0.518203	0.749901	0.702895	0.011387	0.052095	0.657	+
Q5SF07	Insulin-like growth factor 2 mRNA-binding protein 2	Igf2bp2	NA	0.697407	0.615798	0.039512	0.103878	0.656603	+
Q9DD18	D-tyrosyl-tRNA(Tyr) deacylase 1	Dtd1	0.505994	0.749069	0.692957	0.012565	0.054264	0.64934	+
Q3ULJ0	Glycerol-3-phosphate dehydrogenase 1-like protein	Gpd1l	0.459064	0.72232	0.75918	0.020681	0.070964	0.646855	+
O35387	HCLS1-associated protein X-1	Hax1	0.575297	0.76279	0.597027	0.008321	0.044841	0.645038	+
O70252	Heme oxygenase 2	Hmox2	0.778147	0.553892	0.594239	0.011357	0.052095	0.642093	+
A2ALA6	Surfeit locus protein 1	Surf1	0.564249	0.684664	0.674711	0.003602	0.032179	0.641208	+
P55302	Alpha-2-macroglobulin receptor-associated protein	Lrpap1	0.637394	0.678187	0.606804	0.00104	0.021824	0.640795	+
Q99LR1	Monoacylglycerol lipase ABHD12	Abhd12	NA	0.658201	0.609808	0.024284	0.077563	0.634004	+
Q61024	Asparagine synthetase [glutamine-hydrolyzing]	Asns	0.589628	0.613336	0.694656	0.002518	0.028735	0.63254	+
Q9CYZ6	Uncharacterized protein C19orf60 homolog	2810428I15Rik	0.695178	0.646764	0.555624	0.004157	0.034279	0.632522	+
P37913	DNA ligase 1;DNA ligase	Lig1	0.555046	0.721835	0.619857	0.005844	0.039553	0.632246	+
E9PV45	Ubiquitin carboxyl-terminal hydrolase;Ubiquitin carboxyl-terminal hydrolase 24	Usp24	0.63518	0.575902	0.675973	0.002126	0.028489	0.629018	+
Q99P88	Nuclear pore complex protein Nup155	Nup155	0.49598	0.80616	0.581686	0.021009	0.071398	0.627942	+
Q8BTV1	Tumor suppressor candidate 3	Tusc3	NA	0.642163	0.610648	0.016011	0.061689	0.626406	+
P58742	Aladin	Aaas	0.54523	0.625169	0.706155	0.00547	0.038353	0.625518	+
Q8BP71	RNA binding protein fox-1 homolog 2;RNA binding protein fox-1 homolog 1;RNA binding protein fox-1 homolog 3	Rbfox2;Rbfox1;Rbfox3	NA	0.605611	0.645028	0.020058	0.069574	0.62532	+
O88986	2-amino-3-ketobutyrate coenzyme A ligase, mitochondrial	Gcat	0.408575	0.729927	0.733077	0.028506	0.085228	0.62386	+
Q60520	Paired amphipathic helix protein Sin3a	Sin3a	0.559037	0.669547	0.642214	0.002828	0.030165	0.623599	+
D3Z041	Long-chain-fatty-acid--CoA ligase 1	Acsl1	0.634919	0.535819	0.699741	0.005793	0.039443	0.623493	+
E9PYT3	Atlastin-3	Atl3	0.652541	0.620629	0.589133	0.000868	0.021824	0.620768	+
D3YVL0	Putative helicase MOV-10	Mov10	0.727694	0.555252	0.573461	0.007723	0.043909	0.618803	+
P53986	Monocarboxylate transporter 1	Slc16a1	0.506992	0.616466	0.727334	0.010464	0.049578	0.616931	+
Q07076	Annexin A7	Anxa7	0.629433	0.54228	0.677806	0.004111	0.034197	0.616506	+
Q5SYH2	Transmembrane protein 199	Tmem199	0.737441	0.521418	0.589499	0.010542	0.049739	0.616119	+
Q9CWH0	Developmental pluripotency-associated protein 2	Dppa2	0.629564	0.481345	0.733848	0.013898	0.057205	0.614919	+
Q63844	Mitogen-activated protein kinase 3;Mitogen-activated protein kinase	Mapk3	0.646088	0.469997	0.714776	0.013968	0.057264	0.610287	+
Q920E5	Farnesyl pyrophosphate synthase	Fdps	0.560959	0.598505	0.664692	0.002478	0.028735	0.608052	+
Q9D8L3	Translocon-associated protein subunit delta	Ssr4	0.554633	0.647784	0.619499	0.002055	0.028258	0.607305	+
Q9CQ86	Migration and invasion enhancer 1	Mien1	0.500853	0.596525	0.718677	0.01067	0.050133	0.605352	+
A2A7A7	GDH/6PGL endoplasmic bifunctional protein;Glucose 1-dehydrogenase;6-phosphogluconolactonase	H6pd	0.497845	0.517796	0.798893	0.024864	0.078651	0.604845	+
Q91VY9	Zinc finger protein 622	Znf622	0.866186	0.465071	0.48264	0.043797	0.111129	0.604632	+
Q9CY27	Very-long-chain enoyl-CoA reductase	Tecr	0.605416	0.523226	0.676431	0.005369	0.038115	0.601691	+
A0A087WR50		Fn1	0.703283	0.686651	0.410735	0.024081	0.077337	0.600223	+
O08709	Peroxiredoxin-6	Prdx6	0.580451	0.570398	0.645614	0.001546	0.024854	0.598821	+
Q9DBG5	Perilipin-3	Plin3	0.588686	0.530297	0.676661	0.005013	0.037104	0.598548	+
Q9Z0P5	Twinfilin-2	Twf2	0.782862	0.447952	0.564198	0.025882	0.080251	0.598337	+
O70152	Dolichol-phosphate mannosyltransferase subunit 1	Dpm1	0.610994	0.595468	0.583887	0.000173	0.017329	0.596783	+
Q9DCM0	Persulfide dioxygenase ETHE1, mitochondrial	Ethe1	0.548556	0.546526	0.693864	0.006625	0.041582	0.596315	+
Q9WUM3	Coronin-1B	Coro1b	0.789436	0.492604	0.495301	0.026545	0.081805	0.592447	+
A6PW84	Prolyl 3-hydroxylase 1	P3h1;Lepre1	0.563701	0.5468	0.655068	0.003249	0.031286	0.588523	+
Q9DC29	ATP-binding cassette sub-family B member 6, mitochondrial	Abcb6	0.636482	0.58352	0.538573	0.002322	0.028735	0.586192	+
O88455	7-dehydrocholesterol reductase	Dhcr7	0.518627	0.605611	0.63362	0.003473	0.0319	0.585952	+
A2AF47	Dedicator of cytokinesis protein 11	Dock11	0.543842	0.714185	0.495951	0.012588	0.054264	0.584659	+
G5E8I8	Calcium homeostasis endoplasmic reticulum protein	Cherp	0.402216	0.812885	0.537942	0.040177	0.105107	0.584348	+
F8WGM5	Syntaxin-binding protein 2	Stxbp2	0.577741	NA	0.586452	0.004763	0.03615	0.582096	+
Q02819	Nucleobindin-1	Nucb1	0.548832	0.545979	0.64959	0.003416	0.031798	0.581467	+
Q3UVG3	Protein FAM91A1	Fam91a1	0.519615	0.650459	0.573707	0.004238	0.034327	0.58126	+
P54822	Adenylosuccinate lyase	Adsl	0.572713	0.589108	0.580461	6.6e-05	0.017329	0.580761	+
G3X9K3	Brefeldin A-inhibited guanine nucleotide-exchange protein 1	Arfgef1	-0.784384	-0.408106	-0.553873	0.033631	0.094542	-0.582121	+
Q8CJ27	Abnormal spindle-like microcephaly-associated protein homolog	Aspm	-0.766778	-0.470505	-0.51461	0.024078	0.077337	-0.583964	+
Q8BHC4	Dephospho-CoA kinase domain-containing protein	Dcakd	-0.54384	-0.533613	-0.685242	0.006863	0.042166	-0.587565	+
Q9D164	FXYD domain-containing ion transport regulator 6	Fxyd6	-0.589657	-0.656153	-0.529579	0.003794	0.032841	-0.591796	+
Q6IQX8		Zfp219	-0.479396	-0.570988	-0.734653	0.015382	0.060595	-0.595013	+
Q8BQM4	HEAT repeat-containing protein 3	Heatr3	-0.579124	-0.60826	-0.618077	0.000378	0.017662	-0.60182	+
B7ZCL8	55 kDa erythrocyte membrane protein	Mpp1	-0.781597	-0.357965	-0.700403	0.041996	0.10825	-0.613322	+
Q62348	Translin	Tsn	-0.684534	-0.609662	-0.555218	0.003677	0.032458	-0.616471	+
D3Z7B5	Protein CIP2A	C330027C09Rik;Kiaa1524	-0.594234	-0.581172	-0.679567	0.00248	0.028735	-0.618325	+
P42208	Septin-2	Sept2	-0.631823	-0.666547	-0.559585	0.002578	0.028735	-0.619318	+
Q8R2Y8	Peptidyl-tRNA hydrolase 2, mitochondrial	Ptrh2	-0.593898	-0.578992	-0.689165	0.003077	0.030589	-0.620685	+
P58021	Transmembrane 9 superfamily member 2	Tm9sf2	-0.602756	-0.62748	-0.633426	0.000228	0.017329	-0.62122	+
Q8BXC6	COMM domain-containing protein 2	Commd2	NA	-0.599306	-0.653687	0.027613	0.083701	-0.626496	+
Q9ER81	Torsin-1A-interacting protein 2, isoform IFRG15	Tor1aip2	-0.594081	-0.54718	-0.75547	0.009809	0.048022	-0.632244	+
Q6ZQB6	Inositol hexakisphosphate and diphosphoinositol-pentakisphosphate kinase 2	Ppip5k2	-0.670643	NA	-0.600304	0.035197	0.096971	-0.635473	+
O35855	Branched-chain-amino-acid aminotransferase, mitochondrial;Branched-chain-amino-acid aminotransferase	Bcat2	-0.598396	-0.661862	-0.656774	0.001014	0.021824	-0.639011	+
E9QL12	Dysferlin	Dysf	-0.629911	-0.68695	-0.64069	0.000718	0.019707	-0.652517	+
Q8VDK1	Nitrilase homolog 1	Nit1	-0.634617	-0.715628	-0.607794	0.002457	0.028735	-0.65268	+
O70472	Transmembrane protein 131	Tmem131	-0.537068	-0.705332	-0.723357	0.008097	0.044438	-0.655252	+
Q3UUQ7	GPI inositol-deacylase	Pgap1	-0.724518	-0.720754	-0.537507	0.008608	0.04569	-0.660927	+
P62342	Selenoprotein T	Selt	-0.599071	-0.585512	-0.809477	0.011689	0.052629	-0.664687	+
E9QKZ2	Importin-9	Ipo9	-0.762857	-0.611736	-0.620609	0.005376	0.038115	-0.665067	+
P15105	Glutamine synthetase	Glul	-0.739684	-0.844846	-0.411988	0.036285	0.098881	-0.665506	+
P60521	Gamma-aminobutyric acid receptor-associated protein-like 2	Gabarapl2	-0.878947	-0.58162	-0.537321	0.024971	0.078699	-0.665963	+
Q8BHZ0	Protein FAM49A	Fam49a	-0.54042	-0.724545	-0.733495	0.008804	0.046062	-0.666153	+
O35435	Dihydroorotate dehydrogenase (quinone), mitochondrial	Dhodh	-0.559956	-0.591338	-0.847209	0.018143	0.06564	-0.666168	+
Q4JK59	Methylcytosine dioxygenase TET2	Tet2	-0.704586	-0.71209	-0.597668	0.003015	0.0302	-0.671448	+
Q9EP72	ER membrane protein complex subunit 7	Emc7	-0.509283	-0.650435	-0.855837	0.021699	0.072703	-0.671852	+
Q8BKC5	Importin-5	Ipo5	-0.677718	-0.645115	-0.704189	0.000639	0.01904	-0.675674	+
E9QKE4	Rab3 GTPase-activating protein non-catalytic subunit	Rab3gap2	-0.723716	NA	-0.630189	0.043907	0.111187	-0.676953	+
Q9CSH3	Exosome complex exonuclease RRP44	Dis3	-0.698002	-0.707614	-0.638807	0.000995	0.021824	-0.681474	+
E9PYL2		Prr12	-0.758398	-0.641527	-0.647475	0.003087	0.030589	-0.682467	+
G5E870	E3 ubiquitin-protein ligase TRIP12	Trip12	-0.682681	-0.718649	-0.687748	0.00026	0.017329	-0.696359	+
Q8R0F6	Integrin-linked kinase-associated serine/threonine phosphatase 2C	Ilkap	-0.703563	-0.656027	-0.732034	0.00101	0.021824	-0.697208	+
Q5RIM6	Nuclear receptor corepressor 1	Ncor1	-0.68926	-0.788867	-0.614594	0.005196	0.037828	-0.697574	+
E9QL53	Citron Rho-interacting kinase	Cit	-0.684339	-0.717203	-0.700403	0.000183	0.017329	-0.700648	+
O55057	Retinal rod rhodopsin-sensitive cGMP 3,5-cyclic phosphodiesterase subunit delta	Pde6d	-0.800866	-0.691007	-0.615689	0.005806	0.039443	-0.702521	+
E9PZB3		Gm5093	-0.731123	-0.789281	-0.644408	0.003385	0.031767	-0.721604	+
G5E895		Akr1b10	-1.01859	-0.56415	-0.603947	0.037517	0.100828	-0.728896	+
Q8VHX6	Filamin-C	Flnc	-0.745103	-0.813651	-0.672835	0.002974	0.030166	-0.743863	+
Q61211	Eukaryotic translation initiation factor 2D	Eif2d	-0.819359	-0.678901	-0.750746	0.002913	0.030166	-0.749669	+
Q9WV85	Nucleoside diphosphate kinase 3	Nme3	-0.643698	-0.792668	-0.821179	0.005305	0.037893	-0.752515	+
A2A7F4		Rlf	-0.425709	-0.875192	-0.964283	0.045431	0.11341	-0.755061	+
P70371	Telomeric repeat-binding factor 1	Terf1	-0.952967	-0.737009	-0.596393	0.018015	0.065467	-0.762123	+
Q9D6K7	Tetratricopeptide repeat protein 33	Ttc33	-0.836031	-0.660535	-0.824225	0.005317	0.037893	-0.773597	+
Q60809	CCR4-NOT transcription complex subunit 7	Cnot7	NA	-0.784938	-0.763689	0.008735	0.045939	-0.774314	+
E9QKK1	Kinesin-like protein	Cenpe	-0.897118	-0.705886	-0.725385	0.006072	0.040109	-0.77613	+
Q9D172	ES1 protein homolog, mitochondrial	D10Jhu81e	-0.850706	-0.602942	-0.876742	0.012383	0.053885	-0.776797	+
F8VPN7		Dock9	-0.905588	-0.786006	-0.66036	0.008057	0.044429	-0.783984	+
Q8VDV8	MIT domain-containing protein 1	Mitd1	-0.763991	-0.594472	-0.994551	0.021159	0.071789	-0.784338	+
Q8CI75	DIS3-like exonuclease 2	Dis3l2	-0.807405	-0.930425	-0.615969	0.013326	0.055625	-0.7846	+
F8VQJ3		Lamc1	-0.713654	-0.715136	-0.934287	0.008548	0.045493	-0.787692	+
Q8BJL0	SWI/SNF-related matrix-associated actin-dependent regulator of chromatin subfamily A-like protein 1	Smarcal1	-0.848882	NA	-0.727204	0.049051	0.119948	-0.788043	+
Q9CWG8	NADH dehydrogenase [ubiquinone] complex I, assembly factor 7	Ndufaf7	NA	-0.809094	-0.767052	0.016977	0.063353	-0.788073	+
O08528	Hexokinase-2	Hk2	-0.721377	-0.739875	-0.927581	0.006773	0.042087	-0.796278	+
Q0VGB7	Serine/threonine-protein phosphatase 4 regulatory subunit 2	Ppp4r2	-0.436573	-1.01465	-0.96289	0.048839	0.119589	-0.804703	+
Q9R0L6	Pericentriolar material 1 protein	Pcm1	-0.770676	-0.763281	-0.883554	0.002324	0.028735	-0.805837	+
P06797	Cathepsin L1;Cathepsin L1 heavy chain;Cathepsin L1 light chain	Ctsl	-1.09036	-0.701169	-0.631069	0.029898	0.087208	-0.807533	+
Q9CQE6	Histone chaperone ASF1A	Asf1a	-0.894293	-0.881213	-0.652477	0.009281	0.046873	-0.809328	+
O89086	RNA-binding protein 3	Rbm3	-0.6515	-0.694624	-1.08528	0.027777	0.083969	-0.810466	+
P56390	Cyclin-dependent kinases regulatory subunit 2	Cks2	-0.645787	-0.722269	-1.07389	0.025236	0.079101	-0.813983	+
Q8BMP6	Golgi resident protein GCP60	Acbd3	-1.03733	-0.945579	-0.470334	0.043202	0.109815	-0.817749	+
O54916	RalBP1-associated Eps domain-containing protein 1	Reps1	-0.795691	-0.844954	NA	0.01911	0.068068	-0.820322	+
P21956	Lactadherin	Mfge8	-0.931224	-0.969435	-0.56375	0.023902	0.077074	-0.821469	+
Q99LI5	Zinc finger protein 281	Znf281	-0.814509	NA	-0.833695	0.00741	0.043427	-0.824102	+
Q9D0B5	Thiosulfate sulfurtransferase/rhodanese-like domain-containing protein 3	Tstd3	-1.13355	-0.778928	-0.581212	0.035769	0.097903	-0.831229	+
Q9D091	GTPase NRas	Nras	-0.97218	-0.850454	-0.676314	0.010457	0.049578	-0.832983	+
Q3UA16	Kinetochore protein Spc25	Spc25	-1.14514	-0.771305	-0.587805	0.036493	0.099267	-0.834751	+
Q5SS00	DBF4-type zinc finger-containing protein 2 homolog	Zdbf2	-0.795093	-0.754527	-0.9547	0.005314	0.037893	-0.834773	+
Q9QXS6	Drebrin	Dbn1	-0.856853	NA	-0.819723	0.014096	0.057593	-0.838288	+
P35762	CD81 antigen	Cd81	-0.881406	-0.815337	-0.821924	0.000626	0.01904	-0.839556	+
Q6NZF1	Zinc finger CCCH domain-containing protein 11A	Zc3h11a	-0.903466	-0.94735	-0.720185	0.006526	0.041261	-0.857	+
O08600	Endonuclease G, mitochondrial	Endog	-0.752826	-0.709539	-1.12332	0.022432	0.074478	-0.861896	+
E0CYB9	Mitochondrial fission factor	Mff	-0.768122	-0.87369	-0.950835	0.003734	0.032603	-0.864216	+
E9QLZ9	Protein enabled homolog	Enah	-0.853301	-0.910238	-0.860652	0.000418	0.017662	-0.87473	+
P11031	Activated RNA polymerase II transcriptional coactivator p15	Sub1	-0.763613	-0.856047	-1.03505	0.008009	0.044429	-0.884902	+
Q9MD59	NADH-ubiquinone oxidoreductase chain 2	mt-Nd2;Mtnd2	-0.850232	NA	-0.931804	0.029121	0.086357	-0.891018	+
E9Q3P4		Cenpf	-0.844477	-0.936146	-0.897	0.000884	0.021824	-0.892541	+
Q08509	Epidermal growth factor receptor kinase substrate 8	Eps8	-1.14349	-0.6965	-0.918723	0.019127	0.068068	-0.91957	+
Q3UXD9	Peroxisomal trans-2-enoyl-CoA reductase	Pecr	-0.889184	-0.979798	-0.895738	0.001001	0.021824	-0.921573	+
P11352	Glutathione peroxidase 1	Gpx1	-0.875786	-0.831597	-1.07235	0.006317	0.040719	-0.926578	+
O55091	Protein IMPACT	Impact	-0.877012	-0.95113	-0.969619	0.000919	0.021824	-0.932587	+
Q9CQL7	MORF4 family-associated protein 1	Mrfap1;Gm5814	-0.82197	-0.880183	-1.10729	0.008528	0.045493	-0.93648	+
P97329	Kinesin-like protein KIF20A	Kif20a	-0.77892	-0.914637	-1.11922	0.010945	0.050741	-0.937591	+
E9Q7C4		Prr14l	NA	-1.01344	-0.881392	0.044292	0.111776	-0.947414	+
A2RSY6	TRMT1-like protein	Trmt1l	-0.896364	-0.945848	-1.0044	0.001081	0.022064	-0.948872	+
F8WIU1	UPF0687 protein C20orf27 homolog	1700037H04Rik	-0.971505	-0.771339	-1.10685	0.010362	0.049353	-0.949899	+
Q80ZQ9	Protein Simiate	Fam206a	-0.700797	-1.19652	-0.964319	0.021802	0.072866	-0.953877	+
Q9D7J4	Cytochrome c oxidase protein 20 homolog	Cox20	-0.923562	-0.912191	-1.05676	0.002309	0.028735	-0.96417	+
P22682	E3 ubiquitin-protein ligase CBL	Cbl	-0.95752	NA	-1.03137	0.023628	0.076764	-0.994446	+
F6UR10		Spcs1	NA	-1.02876	-0.980133	0.015407	0.060626	-1.00445	+
Q8BVA2	Transmembrane protein 222	Tmem222	-1.12328	-0.861045	-1.03152	0.00579	0.039443	-1.00528	+
Q3UHK6	Teneurin-4	Tenm4	-1.01237	-0.918482	-1.12464	0.003406	0.031798	-1.0185	+
O35623	BET1 homolog	Bet1	-0.998513	-1.0604	-0.998682	0.000408	0.017662	-1.0192	+
Q9QZV9	NTF2-related export protein 1	Nxt1	-1.13412	-0.891552	-1.07582	0.004963	0.03687	-1.03383	+
Q9CQZ1	Heat shock factor-binding protein 1	Hsbp1	-1.4372	-0.98853	-0.715605	0.038068	0.101767	-1.04711	+
Q9R0Q6	Actin-related protein 2/3 complex subunit 1A	Arpc1a	-1.02773	-1.00949	-1.2168	0.003712	0.032556	-1.08467	+
P47955	60S acidic ribosomal protein P1	Rplp1;Gm10073	-0.971624	-1.14392	-1.14743	0.002834	0.030165	-1.08766	+
B2RR83	Probable ATP-dependent RNA helicase YTHDC2	Ythdc2	-1.20479	NA	-1.03141	0.049261	0.120289	-1.1181	+
Q8R1V4	Transmembrane emp24 domain-containing protein 4	Tmed4	-0.762101	-1.34906	-1.26191	0.025447	0.079593	-1.12436	+
Q91YR5	Methyltransferase-like protein 13	Mettl13	-1.27581	-1.18421	-0.97728	0.005886	0.039593	-1.14576	+
Q9D1G1	Ras-related protein Rab-1B	Rab1b	-1.03248	-1.02497	-1.381	0.010337	0.049292	-1.14615	+
Q91WK5	Glycine cleavage system H protein, mitochondrial	Gcsh	-1.12699	-1.12054	-1.21357	0.000675	0.019658	-1.1537	+
Q8BSN6	Vesicle-associated membrane protein 4	Vamp4	-1.49167	-0.860465	-1.11957	0.024153	0.077413	-1.15724	+
Q61686	Chromobox protein homolog 5	Cbx5	-0.971347	-0.889219	-1.6236	0.037762	0.10128	-1.16139	+
Q9CQJ1	HIG1 domain family member 2A	Higd2a	-1.08044	-1.19459	-1.24388	0.001699	0.025673	-1.17297	+
Q6NSQ7	Protein LTV1 homolog	Ltv1	-0.660752	-1.4867	-1.41856	0.046178	0.114607	-1.18867	+
P45878	Peptidyl-prolyl cis-trans isomerase FKBP2	Fkbp2	-1.05296	-1.39723	-1.12212	0.007706	0.043909	-1.19077	+
Q9CQV6	Microtubule-associated proteins 1A/1B light chain 3B	Map1lc3b	-1.18633	-1.11042	-1.27754	0.00164	0.025673	-1.19143	+
Q9CQ21	Malignant T-cell-amplified sequence 2	Mcts2	-1.08275	-1.33065	-1.17579	0.003632	0.032279	-1.1964	+
Q78HU3	Multivesicular body subunit 12A	Mvb12a	NA	-1.13223	-1.26529	0.035296	0.096993	-1.19876	+
A2AR02	Peptidyl-prolyl cis-trans isomerase G;Peptidyl-prolyl cis-trans isomerase	Ppig	-1.21199	NA	-1.24744	0.009174	0.046814	-1.22972	+
Q3URU2	Paternally-expressed gene 3 protein	Peg3	-1.61815	-0.736143	-1.34542	0.041905	0.108222	-1.23324	+
Q6PDL0	Cytoplasmic dynein 1 light intermediate chain 2	Dync1li2	NA	-1.3053	-1.16195	0.036949	0.099914	-1.23363	+
Q9Z0N2	Eukaryotic translation initiation factor 2 subunit 3, Y-linked	Eif2s3y	NA	-1.2715	-1.19663	0.019305	0.068252	-1.23406	+
Q99K23	Ufm1-specific protease 2	Ufsp2	NA	-1.17254	-1.31452	0.036302	0.098881	-1.24353	+
Q923X4	Glutaredoxin-2, mitochondrial	Glrx2	-1.49423	-0.743215	-1.51862	0.038923	0.103096	-1.25202	+
Q3TCD4	Enoyl-CoA delta isomerase 2, mitochondrial	Eci2	-1.27684	-0.862897	-1.6292	0.029694	0.087079	-1.25631	+
O88851	Putative hydrolase RBBP9	Rbbp9	-1.23159	-1.31184	-1.22843	0.000471	0.017662	-1.25728	+
Q8C407	Protein YIPF4	Yipf4	-1.18408	-1.34484	NA	0.040415	0.105591	-1.26446	+
Q9CQ62	2,4-dienoyl-CoA reductase, mitochondrial	Decr1	-0.888772	-1.63726	-1.29929	0.027617	0.083701	-1.27511	+
Q8BGB7	Enolase-phosphatase E1	Enoph1	-1.38282	-1.20741	-1.24609	0.001727	0.025673	-1.27877	+
A2RSX9		Arfip1	-1.0685	-1.35968	-1.40909	0.00683	0.042166	-1.27909	+
Q5U452		2810408M09Rik	NA	-1.28384	-1.28426	0.000104	0.017329	-1.28405	+
Q9CPN8	Insulin-like growth factor 2 mRNA-binding protein 3	Igf2bp3	-1.62637	-0.998632	-1.24918	0.01938	0.068397	-1.2914	+
Q8VE38	Oxidoreductase NAD-binding domain-containing protein 1	Oxnad1	-1.26181	-1.22098	-1.44635	0.00279	0.029934	-1.30971	+
Q9DAM7	Transmembrane protein 263	Tmem263	-1.24631	-1.07889	-1.60793	0.013884	0.057205	-1.31104	+
P60710	Actin, cytoplasmic 1;Actin, cytoplasmic 1, N-terminally processed	Actb	-1.21401	-1.25906	-1.46524	0.003453	0.0319	-1.31277	+
I3ITR1	Iron-sulfur cluster assembly 1 homolog, mitochondrial	AK157302;Isca1	-1.15751	-1.08897	-1.70649	0.021296	0.072001	-1.31766	+
Q9Z0J0	Epididymal secretory protein E1	Npc2	-1.06549	-1.17728	-1.7392	0.023787	0.076878	-1.32732	+
A0A087WNV1	Arf-GAP domain and FG repeat-containing protein 1	Agfg1	-1.6383	-1.54841	-0.813979	0.036258	0.098881	-1.33356	+
P61961	Ubiquitin-fold modifier 1	Ufm1	-0.997623	-1.29008	-1.71856	0.023705	0.076869	-1.33542	+
P10639	Thioredoxin	Txn	-1.44319	-1.28482	-1.28793	0.001522	0.024754	-1.33865	+
Q9D0J4	ADP-ribosylation factor-like protein 2	Arl2	-0.738063	-1.55855	-1.74343	0.048811	0.119589	-1.34668	+
A2RSY1	KAT8 regulatory NSL complex subunit 3	Kansl3	-1.32006	-1.06382	-1.66424	0.016214	0.061813	-1.34937	+
A2AQJ5	Transmembrane protein 87A	Tmem87a	-1.83105	-0.869706	-1.43506	0.038588	0.1026	-1.37861	+
Q99PM9	Uridine-cytidine kinase 2	Uck2	-1.32314	-1.3457	-1.50582	0.001703	0.025673	-1.39155	+
G3X8Q0	Transcription factor Sp1	Sp1	-1.37219	-1.41768	-1.40428	9.3e-05	0.017329	-1.39805	+
A0A087WQB0	Mortality factor 4-like protein 1	Morf4l1	-1.38736	-1.57351	-1.23773	0.004781	0.036188	-1.39953	+
Q7JCY6	NADH-ubiquinone oxidoreductase chain 4	mt-Nd4;Mtnd4	-1.38113	-1.45077	-1.39954	0.000218	0.017329	-1.41048	+
Q8R5C5	Beta-centractin	Actr1b	NA	-1.38768	-1.48439	0.021427	0.072111	-1.43603	+
Q78XR0	Trafficking protein particle complex subunit 6A	Trappc6a	NA	-1.35257	-1.52636	0.038382	0.102201	-1.43946	+
Q8BRF7	Sec1 family domain-containing protein 1	Scfd1	-1.38615	-1.46774	-1.47758	0.000403	0.017662	-1.44382	+
D3Z7E5	Glycogen synthase kinase-3 alpha	Gsk3a	-1.49857	-1.35339	-1.49602	0.001094	0.022064	-1.44933	+
Q9JIH2	Nuclear pore complex protein Nup50	Nup50	-1.47666	-1.67402	-1.19856	0.008928	0.046117	-1.44975	+
Q3UDM0	MOB kinase activator 1B	Mob1b	-0.973054	-1.83915	-1.53833	0.029307	0.08668	-1.45018	+
P26043	Radixin	Rdx	-1.63559	-1.8738	-0.849155	0.04253	0.10893	-1.45285	+
P32020	Non-specific lipid-transfer protein	Scp2	-1.14152	-1.70266	-1.51783	0.012649	0.05444	-1.45401	+
Q99J77		Nans	-1.16966	-1.65634	-1.54757	0.010079	0.048904	-1.45786	+
P61750	ADP-ribosylation factor 4	Arf4	-1.30063	-1.63435	-1.44181	0.004366	0.034688	-1.45893	+
D3YYU8	Obscurin-like protein 1	Obsl1	-1.41684	NA	-1.54083	0.026673	0.082073	-1.47884	+
Q6PGL7	WASH complex subunit FAM21	Fam21	-1.44937	NA	-1.51967	0.015071	0.059897	-1.48452	+
Q9CQC8	Maspardin	Spg21	-1.21138	-1.56859	-1.68271	0.008985	0.046173	-1.48756	+
P40630	Transcription factor A, mitochondrial	Tfam	-1.02216	-1.72659	-1.71753	0.023691	0.076869	-1.48876	+
P41731	CD63 antigen	Cd63	-1.4861	-1.55667	-1.446	0.000467	0.017662	-1.49626	+
P61080	Ubiquitin-conjugating enzyme E2 D1	Ube2d1	-1.58412	-1.57911	-1.3277	0.003182	0.031084	-1.49698	+
P83917	Chromobox protein homolog 1	Cbx1	-1.39794	-1.49169	-1.60928	0.001658	0.025673	-1.49964	+
Q8R404	Protein QIL1	Qil1	-1.55177	-1.39739	-1.5574	0.001216	0.023524	-1.50219	+
P97450	ATP synthase-coupling factor 6, mitochondrial	Atp5j	-1.88051	-1.65414	-0.991343	0.029877	0.087208	-1.50866	+
Q8R016	Bleomycin hydrolase	Blmh	-1.14752	-2.18757	-1.19827	0.046703	0.115336	-1.51112	+
Q99LP6	GrpE protein homolog 1, mitochondrial	Grpel1	-1.5619	-1.41741	-1.56573	0.001036	0.021824	-1.51501	+
P51807	Dynein light chain Tctex-type 1	Dynlt1	-1.88036	-1.19853	-1.48306	0.01649	0.062342	-1.52065	+
Q8CFE2	UPF0609 protein C4orf27 homolog		NA	-1.52591	-1.54409	0.003769	0.032841	-1.535	+
Q9D937	Uncharacterized protein C11orf98 homolog	Ints5	-1.60239	-1.57452	-1.45662	0.000836	0.021748	-1.54451	+
Q80W54	CAAX prenyl protease 1 homolog	Zmpste24	-1.64259	-1.4735	-1.52599	0.001041	0.021824	-1.54736	+
Q9WUM5	Succinyl-CoA ligase [ADP/GDP-forming] subunit alpha, mitochondrial	Suclg1	-1.06261	-1.70957	-1.8818	0.024878	0.078651	-1.55133	+
P97364	Selenide, water dikinase 2	Sephs2	NA	-1.51611	-1.59144	0.01543	0.060626	-1.55378	+
E9Q070		Gm8730	-1.89377	-1.31313	-1.51678	0.011468	0.052275	-1.57456	+
O88441	Metaxin-2	Mtx2	-1.23088	-2.1624	-1.34766	0.032697	0.092432	-1.58031	+
Q9R0Q7	Prostaglandin E synthase 3	Ptges3	-1.89844	-1.67236	-1.17558	0.017726	0.064816	-1.58213	+
Q8BH80	Vesicle-associated membrane protein-associated protein B	Vapb	-1.38356	-1.43286	-1.96489	0.013363	0.055625	-1.59377	+
Q78IK2	Up-regulated during skeletal muscle growth protein 5	Usmg5	-1.35951	-1.70201	-1.73212	0.005547	0.038446	-1.59788	+
Q9ERR7	15 kDa selenoprotein	Sep15	-0.898061	-2.04211	-1.85763	0.045817	0.11423	-1.59927	+
Q8QZT1	Acetyl-CoA acetyltransferase, mitochondrial	Acat1	-1.33965	-1.75389	-1.72012	0.006781	0.042087	-1.60455	+
Q99L48	60S ribosomal export protein NMD3	Nmd3	-1.92287	-1.29018	-1.63864	0.012558	0.054264	-1.61723	+
P09671	Superoxide dismutase [Mn], mitochondrial	Sod2	-1.53742	-1.58665	-1.76886	0.001858	0.026562	-1.63098	+
P34022	Ran-specific GTPase-activating protein	Ranbp1	-0.942502	-2.11491	-1.85358	0.044032	0.111304	-1.637	+
Q8JZN7	Mitochondrial Rho GTPase 2	Rhot2	-1.90487	-1.60939	-1.39688	0.007999	0.044429	-1.63705	+
Q3UIX4		Srsf11	-1.63906	-1.39323	-1.89407	0.007664	0.043909	-1.64212	+
Q6ZWZ7	60S ribosomal protein L17	Rpl17	-1.59509	-1.65106	-1.68565	0.000258	0.017329	-1.64394	+
Q9CPT4	Myeloid-derived growth factor	Mydgf	-1.54952	-1.75766	-1.63283	0.001346	0.023913	-1.64667	+
P58044	Isopentenyl-diphosphate Delta-isomerase 1	Idi1	-2.15192	-1.51348	-1.28195	0.023991	0.077299	-1.64912	+
D3Z125	Tumor protein D52	Tpd52	-1.97453	-1.45044	-1.54259	0.009384	0.047058	-1.65585	+
P61924	Coatomer subunit zeta-1	Copz1	-1.83531	-1.57411	-1.58654	0.002599	0.028887	-1.66532	+
G3X8R0	Receptor expression-enhancing protein;Receptor expression-enhancing protein 5	Reep5	-1.72158	-1.7082	-1.59487	0.000575	0.019025	-1.67488	+
Q9D0L8	mRNA cap guanine-N7 methyltransferase	Rnmt	-1.87263	-1.51805	-1.68301	0.003649	0.032279	-1.69123	+
Q9WU28	Prefoldin subunit 5	Pfdn5	-1.73237	-1.74482	-1.65089	0.000297	0.017396	-1.70936	+
P51859	Hepatoma-derived growth factor	Hdgf	-1.07638	-2.19167	-1.87977	0.035499	0.097418	-1.71594	+
E9Q2E4		Gm15800	-2.09606	-1.47062	-1.58187	0.012366	0.053871	-1.71618	+
Q9D7P6	Iron-sulfur cluster assembly enzyme ISCU, mitochondrial	Iscu	-1.95807	-1.71212	-1.49184	0.006069	0.040109	-1.72068	+
Q9D1Q1	M-phase phosphoprotein 6	Mphosph6	-1.3578	-1.51657	-2.289	0.026808	0.0823	-1.72112	+
Q920Q6	RNA-binding protein Musashi homolog 2	Msi2	-1.57113	-1.84237	-1.765	0.002177	0.028735	-1.72617	+
Q5SW88		Rab1	-1.71758	NA	-1.73969	0.004072	0.034152	-1.72863	+
A2AHY3	DNA-binding protein inhibitor ID-1	Id1	-1.49178	-1.48475	-2.25337	0.02074	0.071022	-1.7433	+
P62878	E3 ubiquitin-protein ligase RBX1;E3 ubiquitin-protein ligase RBX1, N-terminally processed	Rbx1	-1.64594	-1.86628	-1.72696	0.001355	0.023913	-1.74639	+
Q61239	Protein farnesyltransferase/geranylgeranyltransferase type-1 subunit alpha	Fnta	-2.17797	-1.94477	-1.12129	0.032014	0.090997	-1.74801	+
O70456	14-3-3 protein sigma	Sfn	-2.1169	-0.967676	-2.16322	0.04651	0.115034	-1.74926	+
Q91WS0	CDGSH iron-sulfur domain-containing protein 1	Cisd1	-1.68545	-1.71114	-1.85332	0.000889	0.021824	-1.74997	+
Q9D902	General transcription factor IIE subunit 2	Gtf2e2	-2.18045	-1.3642	-1.7126	0.017726	0.064816	-1.75242	+
P97823	Acyl-protein thioesterase 1	Lypla1	-1.25343	-2.06024	-1.94409	0.020027	0.069526	-1.75259	+
P47809	Dual specificity mitogen-activated protein kinase kinase 4	Map2k4	NA	-1.69773	-1.80925	0.020237	0.069836	-1.75349	+
Q9D600	DNA replication complex GINS protein PSF2	Gins2	NA	-1.73721	-1.77537	0.006916	0.042166	-1.75629	+
Q9D9Z5	DET1- and DDB1-associated protein 1	Dda1	NA	-1.79676	-1.71747	0.01436	0.058057	-1.75711	+
Q9DC50	Peroxisomal carnitine O-octanoyltransferase	Crot	-2.12429	-1.583	-1.56567	0.010712	0.050215	-1.75765	+
Q9CPS8	Small membrane A-kinase anchor protein		-1.46186	-2.32434	-1.50436	0.024407	0.077814	-1.76352	+
Q8BFZ3	Beta-actin-like protein 2	Actbl2	NA	-1.84804	-1.70834	0.024994	0.07871	-1.77819	+
Q9MD68	Cytochrome c oxidase subunit 1	mt-Co1;Mtco1	-2.06473	-1.81463	-1.45722	0.009678	0.047553	-1.77886	+
P13020	Gelsolin	Gsn	-1.83242	-1.75976	-1.74588	0.000227	0.017329	-1.77936	+
Q9CZH3	Proteasome assembly chaperone 3	Psmg3;Gm26938	-2.38773	-1.60064	-1.35448	0.029275	0.08668	-1.78095	+
Q6PD03	Serine/threonine-protein phosphatase 2A 56 kDa regulatory subunit alpha isoform	Ppp2r5a	-1.44832	-1.5508	-2.35945	0.025051	0.078766	-1.78619	+
O09131	Glutathione S-transferase omega-1	Gsto1	-1.56453	-1.67389	-2.13398	0.009359	0.047058	-1.7908	+
P63280	SUMO-conjugating enzyme UBC9	Ube2i	-2.02587	-1.30659	-2.06582	0.018281	0.06602	-1.79943	+
P56394	Cytochrome c oxidase copper chaperone	Cox17	-1.47773	-2.23756	-1.69915	0.01527	0.060322	-1.80482	+
G5E8A0	Oxysterol-binding protein;Oxysterol-binding protein-related protein 11	Osbpl11	-1.12964	-2.11413	-2.19014	0.033764	0.094717	-1.8113	+
Q9DCI9	39S ribosomal protein L32, mitochondrial	Mrpl32	-1.63496	-1.79752	-2.01421	0.003641	0.032279	-1.81557	+
Q99MN9	Propionyl-CoA carboxylase beta chain, mitochondrial	Pccb	-1.3504	-1.89549	-2.20771	0.018466	0.066525	-1.81787	+
Q9CQZ5	NADH dehydrogenase [ubiquinone] 1 alpha subcomplex subunit 6	Ndufa6	-2.03971	-2.03915	-1.40666	0.013046	0.055113	-1.8285	+
P11260	LINE-1 retrotransposable element ORF1 protein		-1.77178	-1.58324	-2.13221	0.007663	0.043909	-1.82908	+
Q08879	Fibulin-1	Fbln1	-1.91392	-1.46526	-2.12077	0.010954	0.050741	-1.83331	+
Q9D365	Signal peptidase complex subunit 3	Spcs3	-1.11909	-2.35467	-2.02916	0.038312	0.10208	-1.83431	+
Q99N92	39S ribosomal protein L27, mitochondrial	Mrpl27	-1.20843	-1.92158	-2.38372	0.032897	0.092681	-1.83791	+
D3YWK1	WD repeat domain phosphoinositide-interacting protein 2	Wipi2	NA	-1.89697	-1.80297	0.01617	0.061813	-1.84997	+
Q9WV32	Actin-related protein 2/3 complex subunit 1B	Arpc1b	-1.70241	-2.1843	-1.6689	0.007987	0.044429	-1.85187	+
P97355	Spermine synthase	Sms	-1.99633	-1.83551	-1.72654	0.001784	0.02608	-1.85279	+
Q8BMA5	Protein NPAT	Npat	-1.65529	-2.42501	-1.50561	0.022608	0.074816	-1.86197	+
Q9D104	Signal recognition particle 19 kDa protein	Srp19	-1.83314	-1.8479	-1.91223	0.00017	0.017329	-1.86442	+
Q78JW9	Ubiquitin domain-containing protein UBFD1	Ubfd1	-1.60953	-1.71127	-2.29789	0.012866	0.054781	-1.8729	+
Q7JCX7	Cytochrome c oxidase subunit 3	mt-Co3	-1.94827	-1.89563	-1.79462	0.000575	0.019025	-1.87951	+
Q9JKC8	AP-3 complex subunit mu-1	Ap3m1	-1.21453	-1.97657	-2.45295	0.03484	0.096396	-1.88135	+
Q8JZX4	Splicing factor 45	Rbm17	-2.28431	-1.53127	-1.83523	0.013217	0.05554	-1.8836	+
Q9WV98	Mitochondrial import inner membrane translocase subunit Tim9	Timm9	-1.57167	-1.97696	-2.11354	0.00735	0.043227	-1.88739	+
P48771	Cytochrome c oxidase subunit 7A2, mitochondrial	Cox7a2	-1.85949	-1.78769	-2.01703	0.001284	0.023642	-1.88807	+
Q9Z2Y8	Proline synthase co-transcribed bacterial homolog protein	Prosc	-1.87746	-2.0604	-1.73737	0.002435	0.028735	-1.89174	+
P49615	Cyclin-dependent-like kinase 5	Cdk5	NA	-1.99103	-1.80771	0.030698	0.08838	-1.89937	+
Q9CY50	Translocon-associated protein subunit alpha	Ssr1	-2.55552	-1.75962	-1.40744	0.030259	0.08788	-1.90753	+
Q8VCP8	Adenylate kinase isoenzyme 6	Ak6	NA	-1.9974	-1.84152	0.025835	0.080169	-1.91946	+
P61514	60S ribosomal protein L37a	Rpl37a	-2.49663	-1.68837	-1.59421	0.021397	0.072111	-1.9264	+
Q8CI33	CWF19-like protein 1	Cwf19l1	-1.12982	-2.60555	-2.04912	0.046362	0.11481	-1.92816	+
Q9Z1Z2	Serine-threonine kinase receptor-associated protein	Strap	-2.07245	-1.73428	-2.03644	0.003017	0.0302	-1.94772	+
Q99KH8	Serine/threonine-protein kinase 24;Serine/threonine-protein kinase 24 35 kDa subunit;Serine/threonine-protein kinase 24 12 kDa subunit	Stk24	-2.10196	-1.57369	-2.17169	0.009252	0.046873	-1.94911	+
Q6TEK5	Vitamin K epoxide reductase complex subunit 1-like protein 1	Vkorc1l1	-2.09407	-1.96148	-1.79704	0.001934	0.027178	-1.95086	+
Q9CR39	WD repeat domain phosphoinositide-interacting protein 3	Wdr45b	-1.65861	-1.86199	-2.3443	0.010645	0.050107	-1.95497	+
F7CVJ5		Ahnak2	-1.81095	-1.9394	-2.13333	0.002275	0.028735	-1.96123	+
D3Z4S3	Putative peptidyl-tRNA hydrolase PTRHD1	Ptrhd1	-1.47452	-2.24711	-2.17268	0.015325	0.060431	-1.96477	+
G3X908	Deoxycytidylate deaminase	Dctd	-2.15805	-1.64044	-2.11211	0.006975	0.042249	-1.9702	+
Q9CQ45	Neudesin	Nenf	-1.94921	-1.6954	-2.29915	0.007714	0.043909	-1.98125	+
Q9JKX6	ADP-sugar pyrophosphatase	Nudt5	-1.82451	-2.03276	-2.08769	0.001632	0.025673	-1.98165	+
Q922Q2	Serine/threonine-protein kinase RIO1	Riok1	-2.41912	-1.56008	-1.97134	0.015282	0.060322	-1.98351	+
P31786	Acyl-CoA-binding protein	Dbi	-1.74738	-2.10516	-2.11084	0.003638	0.032279	-1.9878	+
Q9JJU8	SH3 domain-binding glutamic acid-rich-like protein	Sh3bgrl	-2.24328	-1.31516	-2.42868	0.028522	0.085228	-1.99571	+
Q61335	B-cell receptor-associated protein 31	Bcap31	-1.94422	-2.02623	-2.03156	0.0002	0.017329	-2.00067	+
E9QPX3	NADH dehydrogenase [ubiquinone] iron-sulfur protein 4, mitochondrial	Ndufs4	-1.96209	-1.74422	-2.31502	0.006796	0.04211	-2.00711	+
Q3V4B5	COMM domain-containing protein 6	Commd6	-1.9602	-1.88696	-2.18504	0.001983	0.027781	-2.01073	+
Q9ES52	Phosphatidylinositol 3,4,5-trisphosphate 5-phosphatase 1	Inpp5d	-2.38308	-2.1659	-1.50972	0.01648	0.062342	-2.01957	+
Q8C6I2	Succinate dehydrogenase assembly factor 2, mitochondrial	Sdhaf2	-1.59258	-1.7473	-2.73926	0.030019	0.087433	-2.02638	+
A0A087WQH8		Slc35a4	-2.28116	-2.2913	-1.52995	0.015016	0.059738	-2.03414	+
P84089	Enhancer of rudimentary homolog	Erh	-2.23993	-1.75773	-2.14674	0.005158	0.03778	-2.04813	+
Q3V1Z5	40S ribosomal protein S4	Rps4l	-2.36565	-1.89846	-1.93257	0.005258	0.037828	-2.06556	+
Q99J36	THUMP domain-containing protein 1	Thumpd1	-1.2572	-2.8515	-2.10099	0.046099	0.114607	-2.0699	+
Q9CQ02	COMM domain-containing protein 4	Commd4	-2.22027	-1.69391	-2.31657	0.00857	0.045546	-2.07692	+
P55821	Stathmin-2	Stmn2	-2.05746	-1.60719	-2.56654	0.017338	0.063932	-2.07707	+
Q80ZV0	Ribonuclease H2 subunit B	Rnaseh2b	-2.82322	-2.11154	-1.29839	0.04213	0.108337	-2.07772	+
Q9WTP7	GTP:AMP phosphotransferase AK3, mitochondrial	Ak3	-1.65695	-2.38366	-2.19432	0.010791	0.050403	-2.07831	+
Q9JJ94	Sjoegren syndrome nuclear autoantigen 1 homolog	Ssna1	-2.12951	-2.0487	NA	0.012311	0.053871	-2.08911	+
Q9CR02	Translation machinery-associated protein 16	Tma16	-1.48769	-2.51851	-2.26477	0.021306	0.072001	-2.09032	+
P11438	Lysosome-associated membrane glycoprotein 1	Lamp1	-2.16512	-2.21968	-1.8906	0.002361	0.028735	-2.0918	+
Q8CFV9	Riboflavin kinase	Rfk	-2.09304	-2.11881	NA	0.003895	0.033122	-2.10592	+
Q06185	ATP synthase subunit e, mitochondrial	Atp5i;Atp5k	-2.16104	-2.05974	-2.10697	0.000192	0.017329	-2.10925	+
E9PZ00	Prosaposin	Psap	-2.17852	-2.32804	-1.8306	0.004831	0.036393	-2.11239	+
P63276	40S ribosomal protein S17	Rps17	-2.24463	-1.97241	-2.14763	0.001407	0.024174	-2.12155	+
A2A4A1	DnaJ homolog subfamily C member 24	Dnajc24	-1.91667	-1.68258	-2.80803	0.024816	0.07858	-2.13576	+
P14869	60S acidic ribosomal protein P0	Rplp0	-2.24118	-2.12969	-2.04125	0.000732	0.019939	-2.13737	+
Q8BH69	Selenide, water dikinase 1	Sephs1	-1.81972	-2.24039	-2.36369	0.005862	0.039593	-2.14127	+
G3UW89	Zinc finger protein 423	Zfp423;Znf423	-2.1663	-1.54327	-2.75922	0.025496	0.079606	-2.15626	+
P18760	Cofilin-1	Cfl1	-2.22936	-2.07792	-2.16199	0.000412	0.017662	-2.15642	+
P43277	Histone H1.3	Hist1h1d	-1.65778	-1.74891	-3.11347	0.043857	0.111129	-2.17339	+
Q8CIN4	Serine/threonine-protein kinase PAK 2;PAK-2p27;PAK-2p34	Pak2	-1.84932	-2.21263	-2.4609	0.006605	0.041582	-2.17428	+
P63028	Translationally-controlled tumor protein	Tpt1	-1.97484	-2.20377	-2.35158	0.002525	0.028735	-2.17673	+
O08997	Copper transport protein ATOX1	Atox1	-1.83235	-2.66474	-2.05466	0.012734	0.054475	-2.18392	+
O70251	Elongation factor 1-beta	Eef1b;Eef1b2	-2.03547	-1.99135	-2.56102	0.006872	0.042166	-2.19594	+
Q9CPY1	39S ribosomal protein L51, mitochondrial	Mrpl51	-2.19604	-2.12926	-2.29438	0.000472	0.017662	-2.20656	+
Q3TB82	Pleckstrin homology domain-containing family F member 1	Plekhf1	NA	-2.1833	-2.24518	0.008895	0.046117	-2.21424	+
Q9CPQ8	ATP synthase subunit g, mitochondrial	Atp5l	-2.24185	-2.30397	-2.10855	0.000675	0.019658	-2.21812	+
P28474	Alcohol dehydrogenase class-3	Adh5	-2.47666	-2.08071	-2.14852	0.002978	0.030166	-2.2353	+
Q9Z0L8	Gamma-glutamyl hydrolase	Ggh	-1.51341	-2.35038	-2.84559	0.028913	0.085952	-2.23646	+
Q9CQP0	39S ribosomal protein L33, mitochondrial	Mrpl33	-2.2502	-2.09446	-2.38813	0.001426	0.024272	-2.24426	+
Q80XI4	Phosphatidylinositol 5-phosphate 4-kinase type-2 beta	Pip4k2b	-2.05132	-2.19679	-2.50192	0.003464	0.0319	-2.25001	+
Q9CQN7	39S ribosomal protein L41, mitochondrial	Mrpl41;Gm6434	-2.53719	-1.7793	-2.52156	0.011823	0.052753	-2.27935	+
P60824	Cold-inducible RNA-binding protein	Cirbp	-1.83285	-2.65427	-2.35786	0.010898	0.050708	-2.28166	+
Q8CFE6	Sodium-coupled neutral amino acid transporter 2	Slc38a2	-1.81088	-3.30788	-1.77105	0.045234	0.113127	-2.2966	+
H7BWX9	Small ubiquitin-related modifier 2	Sumo2;Sumo3	-2.41544	-2.49546	-1.98469	0.004728	0.03615	-2.29853	+
E9QLA5	Inverted formin-2	Inf2	-2.33735	NA	-2.26283	0.010312	0.049227	-2.30009	+
Q61025	Intraflagellar transport protein 20 homolog	Ift20	-2.33132	-2.32965	-2.247	0.000146	0.017329	-2.30266	+
P62876	DNA-directed RNA polymerases I, II, and III subunit RPABC5	Polr2l;Usp50	-2.24885	-2.34814	-2.33457	0.000181	0.017329	-2.31052	+
Q8BK72	28S ribosomal protein S27, mitochondrial	Mrps27	-3.18934	-1.34383	-2.41026	0.049482	0.120537	-2.31448	+
Q3THW5	Histone H2A.V;Histone H2A.Z;Histone H2A	H2afv;H2afz	-2.20694	-2.36883	-2.37002	0.000547	0.018902	-2.31526	+
Q3TIR3	Synembryn-A	Ric8a	-2.25706	-2.3642	-2.34226	0.000198	0.017329	-2.32117	+
Q80ZP8	Mesencephalic astrocyte-derived neurotrophic factor	Manf	-2.05325	-2.33649	-2.57918	0.004253	0.034368	-2.32298	+
Q63810	Calcineurin subunit B type 1	Ppp3r1	-1.95312	-2.76722	-2.28605	0.010083	0.048904	-2.33546	+
Q8BGW1	Alpha-ketoglutarate-dependent dioxygenase FTO	Fto	NA	-2.41188	-2.26565	0.019896	0.069189	-2.33876	+
Q9CXU0	Mediator of RNA polymerase II transcription subunit 10	Med10	-2.71744	-2.24986	-2.09581	0.006243	0.040555	-2.35437	+
Q9JIX0	Transcription and mRNA export factor ENY2	Eny2	-1.95996	-2.63553	-2.5014	0.007534	0.043665	-2.36563	+
P40240	CD9 antigen	Cd9	-2.98178	-1.90167	-2.25275	0.017417	0.064048	-2.37873	+
Q9Z1P6	NADH dehydrogenase [ubiquinone] 1 alpha subcomplex subunit 7	Ndufa7	-2.98813	-2.25882	-1.97199	0.015435	0.060626	-2.40631	+
Q6PGB6	N-alpha-acetyltransferase 50	Naa50	-2.48956	-2.59308	-2.15642	0.002967	0.030166	-2.41302	+
Q91V89		Ppp2r5d	-2.43534	-2.44423	-2.36379	0.000111	0.017329	-2.41445	+
Q3UHX2	28 kDa heat- and acid-stable phosphoprotein	Pdap1	-1.51376	-2.81857	-2.99314	0.034651	0.096195	-2.44182	+
Q9JL62	Glycolipid transfer protein	Gltp	NA	-2.51851	-2.36728	0.0197	0.068923	-2.4429	+
Q9Z0S1	3(2),5-bisphosphate nucleotidase 1	Bpnt1	-3.26905	-1.73348	-2.33171	0.031825	0.09076	-2.44475	+
Q9D1I5	Methylmalonyl-CoA epimerase, mitochondrial	Mcee	-2.40297	-2.27574	-2.69612	0.002554	0.028735	-2.45828	+
Q9Z2X2	26S proteasome non-ATPase regulatory subunit 10	Psmd10	-2.35133	-2.28117	-2.75192	0.00353	0.032137	-2.46147	+
Q7JCY9	ATP synthase subunit a	mt-Atp6;Mtatp6	-2.51851	-2.39371	-2.47499	0.000221	0.017329	-2.4624	+
Q9D881	Cytochrome c oxidase subunit 5B, mitochondrial	Cox5b	-2.30998	-2.47156	-2.61723	0.001292	0.023642	-2.46626	+
Q921J2	GTP-binding protein Rheb	Rheb	-2.4108	-2.67287	-2.37876	0.0014	0.024174	-2.48748	+
P97822	Acidic leucine-rich nuclear phosphoprotein 32 family member E	Anp32e	-2.7381	-2.03333	-2.69268	0.008274	0.044741	-2.48804	+
P01027	Complement C3;Complement C3 beta chain;C3-beta-c;Complement C3 alpha chain;C3a anaphylatoxin;Acylation stimulating protein;Complement C3b alpha chain;Complement C3c alpha chain fragment 1;Complement C3dg fragment;Complement C3g fragment;Complement C3d fragment;Complement C3f fragment;Complement C3c alpha chain fragment 2	C3	-3.01207	-1.46256	-3.00386	0.04015	0.105103	-2.49283	+
Q9CQU5	ZW10 interactor	Zwint	-2.96311	-2.01683	-2.51118	0.011765	0.052753	-2.49704	+
P15532	Nucleoside diphosphate kinase A;Nucleoside diphosphate kinase	Nme1	-2.87383	-1.45186	-3.18017	0.042427	0.108869	-2.50196	+
F6VQ19	Leucine-rich repeat and calponin homology domain-containing protein 2	Lrch2	-3.2369	-2.79954	-1.61028	0.034485	0.095981	-2.5489	+
Q8R4N0	Citrate lyase subunit beta-like protein, mitochondrial	Clybl	-2.80217	-2.17012	-2.69517	0.005789	0.039443	-2.55582	+
F6ZFT1	Acyl carrier protein;Acyl carrier protein, mitochondrial	Ndufab1	-2.48593	-2.4348	-2.88213	0.002941	0.030166	-2.60096	+
Q60648	Ganglioside GM2 activator	Gm2a	NA	-2.47833	-2.76892	0.03522	0.096971	-2.62363	+
P43274	Histone H1.4	Hist1h1e	-2.75836	-2.35507	-2.85048	0.003268	0.031286	-2.65464	+
Q8R2Y0	Monoacylglycerol lipase ABHD6	Abhd6	NA	-2.84804	-2.4616	0.046252	0.114607	-2.65482	+
Q62347	Cyclic AMP-responsive element-binding protein 1	Creb1	-3.5807	-2.43718	-1.94684	0.031672	0.090548	-2.65491	+
Q9CZ30	Obg-like ATPase 1	Ola1	-2.26755	-2.6405	-3.07834	0.007658	0.043909	-2.66213	+
P62751	60S ribosomal protein L23a	Rpl23a	-2.39709	-2.76247	-2.91092	0.003205	0.031131	-2.69016	+
Q922R5	Serine/threonine-protein phosphatase 4 regulatory subunit 3B	Smek2	-2.35671	-2.52551	-3.19179	0.008853	0.046117	-2.69134	+
A2AKH7	Leucine-rich repeat-containing protein 57	Lrrc57	NA	-2.70768	-2.71753	0.001156	0.022752	-2.71261	+
Q91WN1	DnaJ homolog subfamily C member 9	Dnajc9	-3.25946	-2.28711	-2.60771	0.010896	0.050708	-2.71809	+
P43276	Histone H1.5	Hist1h1b	-2.04613	-2.7626	-3.45544	0.021124	0.071731	-2.75472	+
O54962	Barrier-to-autointegration factor;Barrier-to-autointegration factor, N-terminally processed	Banf1	-2.58388	-2.79606	-2.89244	0.001091	0.022064	-2.75746	+
P56379	6.8 kDa mitochondrial proteolipid	Mp68	-2.69119	-2.77527	-2.8304	0.000214	0.017329	-2.76562	+
O08969	Pleckstrin homology-like domain family A member 2	Phlda2	-2.53554	-2.3957	-3.37448	0.011968	0.053172	-2.76857	+
F6QL70	60S ribosomal protein L29	Gm17669;Gm10709;Rpl29;Gm3550;Gm5218	-3.41246	-2.83117	-2.18663	0.015504	0.060838	-2.81009	+
P15864	Histone H1.2	Hist1h1c	-2.38869	-2.57108	-3.52918	0.015268	0.060322	-2.82965	+
Q9D8S4	Oligoribonuclease, mitochondrial	Rexo2	NA	-2.75449	-2.91616	0.018145	0.06564	-2.83533	+
V9GXI7	39S ribosomal protein L20, mitochondrial	Mrpl20	-2.51214	-3.50568	-2.53679	0.012908	0.054811	-2.85154	+
Q64669	NAD(P)H dehydrogenase [quinone] 1	Nqo1	-2.89276	-2.77554	-2.96926	0.000383	0.017662	-2.87919	+
Q6P8I4	PEST proteolytic signal-containing nuclear protein	Pcnp	-3.09996	-1.69676	-3.84378	0.044593	0.111994	-2.88017	+
P17665	Cytochrome c oxidase subunit 7C, mitochondrial	Cox7c	-2.49161	-3.02936	-3.16377	0.004994	0.037034	-2.89492	+
D3YZ20	DNA-directed RNA polymerase II subunit RPB11	Polr2j	-2.75399	-2.99728	-2.96425	0.000687	0.019658	-2.90517	+
O88848	ADP-ribosylation factor-like protein 6	Arl6	-2.36211	-3.19072	-3.18363	0.008802	0.046062	-2.91215	+
Q6NZB0	DnaJ homolog subfamily C member 8	Dnajc8	-2.6627	-3.16557	-2.91174	0.002474	0.028735	-2.91334	+
P43275	Histone H1.1	Hist1h1a	-2.48491	-2.73269	-3.6617	0.014331	0.058057	-2.95977	+
P62774	Myotrophin	Mtpn	-2.27253	-3.26221	-3.35904	0.013437	0.05566	-2.96459	+
Q3TJ22		Aamp	-3.4812	-2.73561	-2.99018	0.005045	0.037273	-3.069	+
G3UZY2	Thioredoxin, mitochondrial	Txn2	-4.20263	-2.56161	-2.45245	0.032314	0.091604	-3.07223	+
P54227	Stathmin	Stmn1	-3.54685	-3.13607	-2.54992	0.008719	0.045917	-3.07762	+
A0A087WQS2	Basic leucine zipper and W2 domain-containing protein 1	Bzw1	-3.69391	-2.1105	-3.48463	0.024772	0.07858	-3.09635	+
Q9D7N6	39S ribosomal protein L30, mitochondrial	Mrpl30	-3.15924	-3.28329	-2.90734	0.001257	0.023642	-3.11662	+
Q3TMX0	Syntenin-1	Sdcbp	-3.21784	NA	-3.03931	0.018159	0.06564	-3.12857	+
Q9CR80	Protein FAM32A	Fam32a	-2.56807	-4.44013	-2.50608	0.037785	0.10128	-3.17142	+
Q9D6K8	FUN14 domain-containing protein 2	Fundc2	-3.36361	-3.04534	-3.71327	0.003252	0.031286	-3.37407	+
A2AMW0		Capzb	-3.28957	-3.72173	-3.69933	0.001544	0.024854	-3.57021	+
P58710	L-gulonolactone oxidase	Gulo	-3.57473	NA	-3.756	0.015738	0.06146	-3.66536	+
O88271	Craniofacial development protein 1	Cfdp1	-3.21325	-4.16746	-3.86021	0.005585	0.03845	-3.74697	+
Q792Z1		Try10;Gm5771;Prss1	-2.48911	-4.01917	-4.87577	0.032213	0.091385	-3.79469	+
Q9DCC5	Chromobox protein homolog 3	Cbx3	-3.74886	-3.46749	-4.87443	0.011184	0.051561	-4.03026	+

## Sheet: d4
ProteinIDs	Protein.names	Gene.names	log2 Ratio H/L D4_01	log2 Ratio H/L D4_02	log2 Ratio H/L D4_03	p-val D4	Adjusted p-val (BH).2	log2FC_D4	Sign p-val: 0.05 log2FC: 0.58.2
P13541	Myosin-3	Myh3	5.40263	4.75038	NA	0.040842	0.077745	5.0765	+
Q04857	Collagen alpha-1(VI) chain	Col6a1	3.89948	5.05877	4.48851	0.005529	0.020731	4.48225	+
Q2Q5T5		Gm7325	4.46514	4.27776	3.97984	0.001108	0.010624	4.24091	+
G3UWY3	Protein cordon-bleu	Cobl	3.67717	4.11596	3.58568	0.001857	0.012352	3.79293	+
B1ARD6		Slfn9	4.18679	3.36025	2.81025	0.013162	0.035513	3.45243	+
E9QKA2	Steroid hormone receptor ERR2	Esrrb	3.35013	3.42539	3.43938	6.6e-05	0.007925	3.40497	+
Q69ZN7	Myoferlin	Myof	3.43588	3.56939	3.19737	0.001022	0.010372	3.40088	+
Q8CF02	Protein FAM25C	Fam25c	3.04631	3.66552	3.25245	0.002991	0.015148	3.32142	+
Q91YR9	Prostaglandin reductase 1	Ptgr1	3.2817	3.21439	3.15905	0.000121	0.008296	3.21838	+
Q78IQ7	Zinc transporter ZIP4	Slc39a4	2.99981	3.24072	3.01823	0.000629	0.00929	3.08625	+
P42209	Septin-1	Sept1	1.73545	3.63612	3.52422	0.040518	0.077366	2.96526	+
G3X9H7	Metastasis suppressor protein 1	Mtss1	2.99153	2.93821	2.8069	0.000355	0.008448	2.91222	+
B1ARB3	Platelet endothelial cell adhesion molecule	Pecam1	2.75574	2.76216	2.95079	0.000513	0.009068	2.8229	+
Q9ES52	Phosphatidylinositol 3,4,5-trisphosphate 5-phosphatase 1	Inpp5d	3.02974	2.70542	2.5475	0.002633	0.014507	2.76089	+
P14602	Heat shock protein beta-1	Hspb1	2.7415	2.87335	2.65251	0.000541	0.009068	2.75579	+
P11260	LINE-1 retrotransposable element ORF1 protein		2.85145	2.42812	2.95877	0.003461	0.016236	2.74612	+
Q4JK59	Methylcytosine dioxygenase TET2	Tet2	2.76957	2.54103	2.82611	0.001031	0.010373	2.71223	+
Q9CQS7	Developmental pluripotency-associated protein 5A;Developmental pluripotency-associated protein 5B/5C	Dppa5a;Dppa5b	2.65628	2.86351	2.57099	0.001036	0.010373	2.69692	+
Q8C253	Galectin;Galectin-3	Lgals3	2.98878	2.49054	2.50689	0.003748	0.01691	2.66207	+
P52194	Calmegin	Clgn	2.85924	2.49993	2.57251	0.001717	0.012091	2.64389	+
P11403	Fibroblast growth factor 4	Fgf4	2.4959	2.63743	2.59861	0.000268	0.008448	2.57731	+
P05214	Tubulin alpha-3 chain	Tuba3a	2.2904	2.87628	2.49037	0.004508	0.018489	2.55235	+
E9Q3D4		Hsd17b14	2.41478	2.68512	2.39362	0.001408	0.011333	2.49784	+
Q8K354	Carbonyl reductase [NADPH] 3	Cbr3	2.49563	2.43622	2.54006	0.000146	0.008377	2.49064	+
Q9CWH0	Developmental pluripotency-associated protein 2	Dppa2	2.94665	3.03863	1.48055	0.038759	0.074987	2.48861	+
P16460	Argininosuccinate synthase	Ass1;Gm5424	2.46731	2.34679	2.508	0.000393	0.008448	2.4407	+
Q9CWR8	DNA (cytosine-5)-methyltransferase 3-like	Dnmt3l	2.66486	2.34922	2.30662	0.002137	0.013256	2.44023	+
Q8BRB7	Histone acetyltransferase KAT6B	Kat6b	2.71255	2.04663	2.53303	0.006631	0.023186	2.43074	+
A2AWF2		Rex2	2.63155	2.15398	2.46546	0.003337	0.016013	2.417	+
Q811P8	Rho GTPase-activating protein 32	Arhgap32	2.24158	2.40086	2.4773	0.000855	0.009951	2.37325	+
Q6NVG5	Melanoregulin	Mreg	2.39266	2.478	2.16175	0.00162	0.011896	2.34414	+
Q7TNL7		Dusp9	2.33352	2.33887	2.20054	0.00039	0.008448	2.29098	+
Q8VCN5	Cystathionine gamma-lyase	Cth	2.22694	2.28083	2.32285	0.000149	0.008377	2.27687	+
P11404	Fatty acid-binding protein, heart	Fabp3	2.23035	2.29026	2.24824	6.2e-05	0.007925	2.25628	+
Q8K010	5-oxoprolinase	Oplah	2.06278	2.47017	2.16572	0.002987	0.015148	2.23289	+
P10493	Nidogen-1	Nid1	2.17954	2.13602	2.35807	0.000931	0.010041	2.22454	+
Q9Z2H5	Band 4.1-like protein 1	Epb41l1	2.20532	2.23369	2.15435	0.000112	0.008117	2.19778	+
V9GWU7	Serine/threonine-protein kinase WNK3	Wnk3	2.13808	2.30101	2.14989	0.00057	0.009164	2.19632	+
Q62422	Osteoclast-stimulating factor 1	Ostf1	2.30442	1.99374	NA	0.045936	0.084732	2.14908	+
P24288	Branched-chain-amino-acid aminotransferase, cytosolic;Branched-chain-amino-acid aminotransferase	Bcat1	2.01282	2.23849	2.15502	0.00095	0.010042	2.13544	+
Q8K3F7	L-threonine 3-dehydrogenase, mitochondrial	Tdh	2.08264	2.21549	2.04611	0.000592	0.009164	2.11475	+
P97742	Carnitine O-palmitoyltransferase 1, liver isoform	Cpt1a	2.26065	NA	1.94976	0.046921	0.085988	2.10521	+
O70576	Cohesin subunit SA-3	Stag3	2.14006	NA	2.03683	0.015731	0.040072	2.08845	+
Q9JIM1	Equilibrative nucleoside transporter 1	Slc29a1	2.23707	2.14819	1.84372	0.003274	0.01589	2.07633	+
Q9Z0P5	Twinfilin-2	Twf2	2.08407	2.03762	2.01184	0.000107	0.008117	2.04451	+
E9Q8D0		Dnajc21	1.99879	2.02704	2.10064	0.000221	0.008448	2.04216	+
P48972	Myb-related protein B	Mybl2	1.81029	2.25567	2.01087	0.004018	0.017574	2.02561	+
A0A087WR50		Fn1	2.01352	2.07048	1.94943	0.000302	0.008448	2.01114	+
Q8C605	ATP-dependent 6-phosphofructokinase;ATP-dependent 6-phosphofructokinase, platelet type	Pfkp	2.10081	2.04588	1.88444	0.001042	0.010373	2.01038	+
Q8R080	G2 and S phase-expressed protein 1	Gtse1	1.89204	2.03399	1.99774	0.000465	0.0087	1.97459	+
O55100	Synaptogyrin-1	Syngr1	1.82325	2.04002	2.05011	0.001406	0.011333	1.97113	+
P18155	Bifunctional methylenetetrahydrofolate dehydrogenase/cyclohydrolase, mitochondrial;NAD-dependent methylenetetrahydrofolate dehydrogenase;Methenyltetrahydrofolate cyclohydrolase	Mthfd2	1.81278	1.84587	2.25349	0.005131	0.01989	1.97071	+
Q5SSZ5	Tensin-3	Tns3	1.88226	1.97823	2.03529	0.000516	0.009068	1.96526	+
Q62179	Semaphorin-4B	Sema4b	1.92854	2.0691	1.87315	0.000887	0.009951	1.95693	+
O70400	PDZ and LIM domain protein 1	Pdlim1	1.90957	1.94754	2.00695	0.00021	0.008448	1.95468	+
Q9Z2Z6	Mitochondrial carnitine/acylcarnitine carrier protein	Slc25a20	2.1036	1.92292	1.83114	0.001676	0.012008	1.95256	+
Q04447	Creatine kinase B-type	Ckb	1.8634	1.96016	1.99125	0.000394	0.008448	1.93827	+
Q60953	Protein PML	Pml	2.00098	1.79509	1.8715	0.00101	0.010289	1.88919	+
Q80ZW2	Protein THEM6	Them6	2.00772	1.81368	1.81654	0.001165	0.010758	1.87931	+
Q99LS3	Phosphoserine phosphatase	Psph	1.90861	1.90719	1.78721	0.000464	0.0087	1.86767	+
P52196	Thiosulfate sulfurtransferase	Tst	1.76375	1.80751	1.93045	0.00074	0.009829	1.8339	+
O35621	Phosphomannomutase 1;Phosphomannomutase	Pmm1	1.76811	1.86313	1.84332	0.000251	0.008448	1.82486	+
Q80ZK9	WD and tetratricopeptide repeats protein 1	Wdtc1	1.98717	1.65531	1.76444	0.002923	0.015012	1.80231	+
A6PW84	Prolyl 3-hydroxylase 1	P3h1;Lepre1	1.74087	1.92114	1.73803	0.00113	0.010695	1.80001	+
E9QPX1	Collagen alpha-1(XVIII) chain;Endostatin	Col18a1	1.8472	1.74436	1.79373	0.000274	0.008448	1.7951	+
A2A468	Nuclear receptor coactivator 3	Ncoa3	2.18579	1.62567	1.49743	0.013965	0.037028	1.76963	+
P51855	Glutathione synthetase	Gss	1.74519	1.80596	1.754	0.000115	0.008117	1.76839	+
A2TJV2	Paralemmin-3	Palm3	1.70979	1.9077	1.65258	0.00193	0.012566	1.75669	+
Q9WUR9	Adenylate kinase 4, mitochondrial	Ak4	1.73322	1.85306	1.67668	0.000877	0.009951	1.75432	+
Q9R0Y5	Adenylate kinase isoenzyme 1	Ak1	1.7109	1.70494	1.77794	0.000183	0.008377	1.73126	+
E9Q6S4		Gm17067	1.71142	1.7672	1.68054	0.000217	0.008448	1.71972	+
Q62315	Protein Jumonji	Jarid2	1.75886	1.70767	1.64222	0.000393	0.008448	1.70292	+
E9Q7W0	Recombining binding protein suppressor of hairless	Rbpj	1.72323	1.77997	1.58625	0.001147	0.010749	1.69648	+
Q3TYD6	Serine/threonine-protein kinase LMTK2	Lmtk2	1.90332	1.50154	1.67006	0.004708	0.018891	1.69164	+
Q9D3N8	Growth hormone-regulated TBC protein 1	Grtp1	1.89337	1.70114	1.43384	0.00626	0.022271	1.67612	+
G3UYN0	LINE-1 type transposase domain-containing protein 1	L1td1	1.70676	1.68278	1.58223	0.000529	0.009068	1.65726	+
K3W4Q8	Basigin	Bsg	1.6967	1.58295	1.63109	0.000405	0.008448	1.63691	+
O70579	Peroxisomal membrane protein PMP34	Slc25a17	1.59813	1.69441	1.61237	0.000337	0.008448	1.63497	+
O70405	Serine/threonine-protein kinase ULK1	Ulk1	1.2781	1.76219	1.81106	0.010884	0.031541	1.61712	+
E9Q9Y4	Methylcytosine dioxygenase TET1	Tet1	1.79529	1.56993	1.47859	0.00338	0.016075	1.6146	+
E9Q3X0		Mvp	1.62897	1.59855	1.61336	3e-05	0.007925	1.61363	+
P10649	Glutathione S-transferase Mu 1	Gstm1	1.56661	1.75201	1.50342	0.002147	0.013299	1.60735	+
O35054	Claudin-4	Cldn4	1.68142	1.54947	1.57709	0.000628	0.00929	1.60266	+
P98203	Armadillo repeat protein deleted in velo-cardio-facial syndrome homolog	Arvcf	1.67487	1.65819	1.41425	0.002821	0.014813	1.58244	+
H3BJQ3	DNA dC->dU-editing enzyme APOBEC-3	Apobec3	1.58315	1.59957	1.53524	0.000151	0.008377	1.57265	+
E9QAF9	Protein TANC1	Tanc1	1.53753	1.57194	1.58649	8.6e-05	0.008117	1.56532	+
Q4LDD4	Arf-GAP with Rho-GAP domain, ANK repeat and PH domain-containing protein 1	Arap1	2.26889	1.27501	1.14181	0.048118	0.08765	1.5619	+
Q3UIL6	Pleckstrin homology domain-containing family A member 7	Plekha7	1.53694	1.48561	1.62658	0.000706	0.009655	1.54971	+
Q99MV7	RING finger protein 17	Rnf17	1.65047	1.51992	1.42984	0.00174	0.012125	1.53341	+
F8WHN2	Chromobox protein homolog 7	Cbx7	1.20593	1.83486	1.5461	0.013839	0.036802	1.52896	+
Q69Z38	Pseudopodium-enriched atypical kinase 1	Peak1	1.37491	1.64081	1.45106	0.002808	0.014796	1.48893	+
P52734	FYVE, RhoGEF and PH domain-containing protein 1	Fgd1	1.47708	1.54709	1.43676	0.00047	0.0087	1.48698	+
P08226	Apolipoprotein E	Apoe	1.55286	1.49695	1.38963	0.001046	0.010375	1.47981	+
Q9EPQ8	Transcription factor 20	Tcf20	1.88427	1.12684	1.4164	0.021632	0.049813	1.47584	+
O54946	DnaJ homolog subfamily B member 6	Dnajb6	1.39661	1.60701	1.37458	0.002567	0.014351	1.4594	+
P60487	Pyridoxal phosphate phosphatase	Pdxp	1.4187	1.50037	1.44928	0.000268	0.008448	1.45612	+
O88322	Nidogen-2	Nid2	1.55732	1.25838	1.49967	0.004027	0.017574	1.43846	+
Q61024	Asparagine synthetase [glutamine-hydrolyzing]	Asns	1.65525	0.869284	1.73798	0.035923	0.070743	1.42084	+
F6XC25	Coiled-coil and C2 domain-containing protein 1B	Cc2d1b	1.42375	1.44203	1.38535	0.000139	0.008377	1.41704	+
Q9Z2M6	Ubiquitin-like protein 3	Ubl3	1.35295	1.5348	1.35787	0.001782	0.012239	1.41521	+
Q76LV0	Glutathione peroxidase;Phospholipid hydroperoxide glutathione peroxidase, mitochondrial;Phospholipid hydroperoxide glutathione peroxidase, nuclear	Gpx4	1.43751	1.44416	1.33909	0.000582	0.009164	1.40692	+
Q9ERG0	LIM domain and actin-binding protein 1	Lima1	1.3927	1.44338	1.38232	0.00018	0.008377	1.40613	+
Q9JII6	Alcohol dehydrogenase [NADP(+)]	Akr1a1	1.4275	1.45351	1.33522	0.000651	0.009388	1.40541	+
Q8C5H8	NAD kinase 2, mitochondrial	Nadk2	1.33133	1.43003	1.4488	0.000673	0.009447	1.40339	+
Q9D8C3	Putative bifunctional UDP-N-acetylglucosamine transferase and deubiquitinase ALG13	Alg13	1.40597	1.34827	1.44749	0.000422	0.008448	1.40058	+
Q9QYY0	GRB2-associated-binding protein 1	Gab1	1.28256	1.62392	1.2762	0.006719	0.023372	1.39423	+
Q811J3	Iron-responsive element-binding protein 2	Ireb2	1.43955	1.41561	1.31804	0.000713	0.00968	1.39107	+
Q8BTE5	Protein CEBPZOS	Cebpzos	1.44067	1.3633	1.36112	0.000355	0.008448	1.38836	+
A0A0A0MQC2	Pleckstrin homology domain-containing family G member 5	Plekhg5	1.69423	1.32207	1.13194	0.013963	0.037028	1.38275	+
P16045	Galectin-1	Lgals1	1.32298	1.49387	1.32769	0.00165	0.011913	1.38151	+
E9QAE4	Histone-lysine N-methyltransferase;Histone-lysine N-methyltransferase, H3 lysine-36 and H4 lysine-20 specific	Nsd1	1.57276	1.21082	1.33722	0.005908	0.021559	1.3736	+
Q8BHG2	UPF0587 protein C1orf123 homolog	0610037L13Rik	1.34742	1.41416	1.34882	0.000258	0.008448	1.37013	+
F8VQB6	Unconventional myosin-X	Myo10	1.33812	1.35494	1.39821	0.000172	0.008377	1.36375	+
Q80U70	Polycomb protein Suz12	Suz12	1.44697	1.41648	1.21713	0.002796	0.014796	1.36019	+
Q80WW9	DDRGK domain-containing protein 1	Ddrgk1	1.62324	1.21274	1.24351	0.009292	0.028447	1.35983	+
Q91UZ5	Inositol monophosphatase 2	Impa2	1.3178	1.37094	1.38507	0.000227	0.008448	1.35794	+
Q6P4T0	Autophagy-related protein 2 homolog A	Atg2a	1.5166	1.66308	0.836542	0.034326	0.068633	1.33874	+
Q8C570	mRNA export factor	Rae1	1.13344	1.27013	1.5874	0.010062	0.02998	1.33032	+
O09172	Glutamate--cysteine ligase regulatory subunit	Gclm	1.36275	1.32509	1.28683	0.000273	0.008448	1.32489	+
P54731	FAS-associated factor 1	Faf1	1.42884	1.45308	1.09214	0.007644	0.025321	1.32469	+
A2AKX3	Probable helicase senataxin	Setx	1.26881	1.35078	1.34702	0.000408	0.008448	1.3222	+
E9Q634	Unconventional myosin-Ie	Myo1e	1.30538	1.37266	1.28229	0.000421	0.008448	1.32011	+
O70475	UDP-glucose 6-dehydrogenase	Ugdh	1.25986	1.2242	1.46767	0.003305	0.015962	1.31724	+
E9QPN7	Dedicator of cytokinesis protein 6	Dock6	1.33721	1.32632	1.28342	0.000156	0.008377	1.31565	+
P13864	DNA (cytosine-5)-methyltransferase 1	Dnmt1	1.24917	1.30583	1.38364	0.00088	0.009951	1.31288	+
Q8VCW8	Acyl-CoA synthetase family member 2, mitochondrial	Acsf2	1.2056	1.34272	1.36458	0.001452	0.01136	1.3043	+
Q9DCN2	NADH-cytochrome b5 reductase 3;NADH-cytochrome b5 reductase 3 membrane-bound form;NADH-cytochrome b5 reductase 3 soluble form;NADH-cytochrome b5 reductase	Cyb5r3	1.29394	1.32763	1.29089	8.1e-05	0.008117	1.30415	+
Q62441	Transducin-like enhancer protein 4	Tle4	1.18256	1.28971	1.4276	0.002963	0.015127	1.29996	+
Q69ZR9	Protein FAM208A	Fam208a	1.28272	1.38603	1.16723	0.002434	0.014088	1.27866	+
Q9JMH9	Unconventional myosin-XVIIIa	Myo18a	1.21866	1.27149	1.34056	0.000763	0.009829	1.27691	+
Q9D666	SUN domain-containing protein 1	Sun1	1.33985	1.28432	1.20622	0.00092	0.009959	1.2768	+
P85094	Isochorismatase domain-containing protein 2A, mitochondrial	Isoc2a	1.41906	1.26193	1.13319	0.0042	0.017869	1.27139	+
P07901	Heat shock protein HSP 90-alpha	Hsp90aa1	1.20023	1.34523	1.2574	0.001105	0.010624	1.26762	+
Q3TLP5	Enoyl-CoA hydratase domain-containing protein 2, mitochondrial	Echdc2	1.23209	1.32091	1.24642	0.000472	0.0087	1.26648	+
A2AIX1		Sec16a	1.18231	1.24417	1.33704	0.001282	0.011087	1.25451	+
Q9CZJ1	Probable U3 small nucleolar RNA-associated protein 11	Utp11l	1.28155	1.13188	1.3371	0.002394	0.014037	1.25018	+
Q80Y98	Phospholipase DDHD2	Ddhd2	1.20684	1.26563	1.23304	0.000189	0.008377	1.23517	+
P70227	Inositol 1,4,5-trisphosphate receptor type 3	Itpr3	1.25691	1.20203	1.22096	0.000172	0.008377	1.22663	+
P24472	Glutathione S-transferase A4	Gsta4	1.27653	1.2252	1.1715	0.000613	0.009238	1.22441	+
Q921E6	Polycomb protein EED	Eed	1.43843	1.1936	1.03006	0.009317	0.028483	1.2207	+
P16125	L-lactate dehydrogenase B chain;L-lactate dehydrogenase	Ldhb	1.0098	1.37124	1.26698	0.007712	0.025428	1.21601	+
Q3TV70	Nuclear receptor 2C2-associated protein	Nr2c2ap	1.21956	1.28313	1.14532	0.001071	0.010454	1.216	+
F6UHR6	Oxysterol-binding protein;Oxysterol-binding protein-related protein 9	Osbpl9	1.20799	1.25409	1.18275	0.000295	0.008448	1.21494	+
Q91W43	Glycine dehydrogenase (decarboxylating), mitochondrial	Gldc	1.18842	1.23845	1.2069	0.000145	0.008377	1.21126	+
Q64337	Sequestosome-1	Sqstm1	1.18876	1.28789	1.14901	0.001165	0.010758	1.20855	+
Q921J4	Ubiquitin-conjugating enzyme E2 S	Ube2s	1.17407	1.24376	1.2064	0.000278	0.008448	1.20808	+
P97499	Telomerase protein component 1	Tep1	1.28225	1.04584	1.29294	0.004435	0.018367	1.20701	+
Q9CZN7	Serine hydroxymethyltransferase	Shmt2	1.16102	1.28472	1.17042	0.001086	0.010507	1.20539	+
Q9DCA5	Ribosome biogenesis protein BRX1 homolog	Brix1	1.45539	1.07163	1.08383	0.010771	0.031322	1.20362	+
E9Q7U2	Calcium-binding and coiled-coil domain-containing protein 1	Calcoco1	1.21531	1.1875	1.17787	8.8e-05	0.008117	1.19356	+
Q9Z321	DNA topoisomerase 3-beta-1;DNA topoisomerase	Top3b	1.18533	1.16199	1.2287	0.000269	0.008448	1.19201	+
Q9D6Z0	Alpha-ketoglutarate-dependent dioxygenase alkB homolog 7, mitochondrial	Alkbh7	1.22454	1.04621	1.29827	0.003932	0.017355	1.18967	+
E9Q066	La-related protein 4	Larp4	1.17567	1.25255	1.1405	0.000773	0.009829	1.18957	+
Q923E4	NAD-dependent protein deacetylase sirtuin-1;SirtT1 75 kDa fragment	Sirt1	1.22372	1.2901	1.05073	0.003586	0.016614	1.18819	+
Q8BR90	UPF0600 protein C5orf51 homolog		1.29696	1.2174	1.0492	0.003759	0.016942	1.18786	+
Q8BZA9	Fructose-2,6-bisphosphatase TIGAR	Tigar	1.20263	1.14741	1.20889	0.000271	0.008448	1.18631	+
Q80U72	Protein scribble homolog	Scrib	1.11932	1.23623	1.20054	0.000851	0.009951	1.18537	+
Q7TSY8	Shugoshin-like 2	Sgol2	1.22095	1.10202	1.2225	0.001138	0.010695	1.18182	+
E9Q9I2		Dlg5	1.17171	1.1748	1.19559	4e-05	0.007925	1.1807	+
P28658	Ataxin-10	Atxn10	1.12422	1.18385	1.22551	0.000622	0.00929	1.17786	+
G3UX50	Death domain-associated protein 6	Daxx	1.43456	1.29176	0.80639	0.025088	0.055272	1.17757	+
Q9QZ08	N-acetyl-D-glucosamine kinase	Nagk	1.08743	1.26282	1.1764	0.00185	0.012352	1.17555	+
Q9D4G5		Pop1	1.2135	1.15141	1.15154	0.000311	0.008448	1.17215	+
Q921M7	Protein FAM49B	Fam49b	1.14218	1.2032	1.16325	0.000234	0.008448	1.16955	+
Q8BH04	Phosphoenolpyruvate carboxykinase [GTP], mitochondrial	Pck2	1.04222	1.25692	1.20721	0.003068	0.015347	1.16879	+
Q80XN0	D-beta-hydroxybutyrate dehydrogenase, mitochondrial	Bdh1	1.22747	1.16544	1.10536	0.000913	0.009951	1.16609	+
Q6PGG6	Guanine nucleotide-binding protein-like 3-like protein	Gnl3l	1.11467	1.22801	1.15212	0.000818	0.009951	1.16493	+
Q8VDL4	ADP-dependent glucokinase	Adpgk	1.12745	1.03795	1.31937	0.005068	0.019737	1.16159	+
D3Z041	Long-chain-fatty-acid--CoA ligase 1	Acsl1	1.25819	0.927251	1.26429	0.009246	0.028376	1.14991	+
Q3UHQ6	Protein dopey-2	Dopey2	1.25699	1.07933	1.0885	0.002549	0.014307	1.14161	+
Q8BSZ2	AP-3 complex subunit sigma-2	Ap3s2	0.91316	1.21732	1.29353	0.010205	0.030216	1.14134	+
Q8BHL3	TBC1 domain family member 10B	Tbc1d10b	1.1657	1.01374	1.23615	0.003306	0.015962	1.13853	+
Q61510	E3 ubiquitin/ISG15 ligase TRIM25	Trim25	1.22389	1.0948	1.07725	0.001664	0.01195	1.13198	+
F6QX82	Ribonuclease 3	Drosha	1.06269	1.15193	1.17698	0.00094	0.010042	1.13053	+
Q04692	SWI/SNF-related matrix-associated actin-dependent regulator of chromatin subfamily A containing DEAD/H box 1	Smarcad1	1.14278	1.16622	1.07902	0.000532	0.009068	1.12934	+
P42567	Epidermal growth factor receptor substrate 15	Eps15	1.21186	1.11216	1.06068	0.001543	0.011699	1.12823	+
K3W4R2	Myosin-14	Myh14	1.14183	1.14111	1.09289	0.000207	0.008448	1.12528	+
Q8R3B1	1-phosphatidylinositol 4,5-bisphosphate phosphodiesterase delta-1	Plcd1	1.22771	1.10184	1.03896	0.002433	0.014088	1.12284	+
Q8R2U6	Diphosphoinositol polyphosphate phosphohydrolase 2	Nudt4	1.12212	1.24507	0.986001	0.004451	0.018407	1.11773	+
Q9Z2Z9	Glutamine--fructose-6-phosphate aminotransferase [isomerizing] 2	Gfpt2	0.967017	1.27045	1.11374	0.006095	0.021924	1.11707	+
Q9JI75	Ribosyldihydronicotinamide dehydrogenase [quinone]	Nqo2	1.1311	1.12232	1.07049	0.000291	0.008448	1.10797	+
Q9D0R2	Threonine--tRNA ligase, cytoplasmic	Tars	1.04573	1.18147	1.09618	0.001276	0.011087	1.10779	+
Q91XC9	Peroxisomal membrane protein PEX16	Pex16	1.01602	1.15931	1.14785	0.001718	0.012091	1.10773	+
Q9D903	Probable rRNA-processing protein EBP2	Ebna1bp2	1.32974	1.03861	0.954256	0.010382	0.030549	1.10753	+
Q8BX02	KN motif and ankyrin repeat domain-containing protein 2	Kank2	1.14631	1.14915	1.0228	0.001415	0.011333	1.10609	+
Q8R2Y2	Cell surface glycoprotein MUC18	Mcam	0.655492	1.16906	1.48947	0.0451	0.083587	1.10467	+
Q922Y1	UBX domain-containing protein 1	Ubxn1	1.0869	1.15914	1.04399	0.000937	0.010042	1.09667	+
Q8C9B9	Death-inducer obliterator 1	Dido1	1.07493	1.09462	1.11547	0.000114	0.008117	1.09501	+
Q3TZX3	Solute carrier family 25 member 33	Slc25a33	1.328	1.26876	0.680583	0.033967	0.068078	1.09245	+
O88958	Glucosamine-6-phosphate isomerase 1	Gnpda1	1.07023	1.10004	1.08999	6.5e-05	0.007925	1.08675	+
Q4FE56	Ubiquitin carboxyl-terminal hydrolase;Probable ubiquitin carboxyl-terminal hydrolase FAF-X	Usp9x	1.08949	1.09806	1.07159	5.2e-05	0.007925	1.08638	+
P47857	ATP-dependent 6-phosphofructokinase, muscle type	Pfkm	1.07168	1.10616	1.07949	9.2e-05	0.008117	1.08578	+
Q9QWT9	Kinesin-like protein KIFC1	Kifc1	1.06041	1.18912	0.988537	0.002942	0.015067	1.07935	+
P61327	Protein mago nashi homolog	Magoh	1.12631	1.07062	1.04036	0.000544	0.009069	1.0791	+
Q8C483	Serine--tRNA ligase, cytoplasmic	Sars	1.03286	1.10706	1.09726	0.000465	0.0087	1.07906	+
Q99K46	Ubiquitin carboxyl-terminal hydrolase 11	Usp11	1.07313	NA	1.08356	0.003081	0.015376	1.07834	+
P97452	Ribosome biogenesis protein BOP1	Bop1	1.26001	0.959216	1.01216	0.007327	0.0246	1.07713	+
E9Q4K7	Kinesin-like protein	Kif13b	1.07394	1.07997	1.07677	3e-06	0.006434	1.07689	+
Q9CY62	E3 ubiquitin-protein ligase RNF181	Rnf181	1.04167	1.15619	1.02851	0.001418	0.011333	1.07546	+
O35459	Delta(3,5)-Delta(2,4)-dienoyl-CoA isomerase, mitochondrial	Ech1	1.42027	0.738115	1.0354	0.032723	0.066755	1.06459	+
Q9QYI3	DnaJ homolog subfamily C member 7	Dnajc7	1.06332	1.12675	0.989405	0.001399	0.011333	1.05983	+
Q8VCD7	Lysine-specific demethylase 4C	Kdm4c	1.0363	1.07641	NA	0.012084	0.033735	1.05635	+
Q9JM62	Receptor expression-enhancing protein 6	Reep6	1.07285	1.11377	0.982371	0.001348	0.011333	1.05633	+
F6WIU1	Protein KRI1 homolog	Kri1	1.12195	1.16957	0.862683	0.008125	0.026482	1.0514	+
Q8K298	Actin-binding protein anillin	Anln	0.994977	1.07851	1.0683	0.00063	0.00929	1.04726	+
Q6J1H4	Undifferentiated embryonic cell transcription factor 1	Utf1	1.14519	0.986104	1.00795	0.002256	0.013657	1.04642	+
P34152	Focal adhesion kinase 1	Ptk2	1.01687	1.07209	1.03364	0.000247	0.008448	1.04087	+
Q7TSV4	Phosphoglucomutase-2	Pgm2	1.25189	1.06979	0.793936	0.016036	0.040645	1.03854	+
H3BL37	Treacle protein	Tcof1	1.03787	1.0124	1.0562	0.00015	0.008377	1.03549	+
Q3U3A7	Metastasis-associated protein MTA3	Mta3	1.06095	0.977884	1.0535	0.000662	0.009406	1.03078	+
P48754	Breast cancer type 1 susceptibility protein homolog	Brca1	0.924435	1.05684	1.09954	0.002624	0.014497	1.02694	+
Q80XC6	Protein NRDE2 homolog	Nrde2	1.1093	1.05582	0.915492	0.003152	0.015621	1.02687	+
Q9Z1N2	Origin recognition complex subunit 1	Orc1	1.17845	0.819334	1.08139	0.010744	0.031286	1.02639	+
E9QLG3	MAX gene-associated protein	Mga	1.14889	0.87351	1.03938	0.006096	0.021924	1.02059	+
Q9D826	Peroxisomal sarcosine oxidase	Pipox	1.04647	1.00057	1.00995	0.000189	0.008377	1.019	+
D3Z7G3	Uncharacterized protein C10orf35 homolog	2010107G23Rik	1.04398	0.978472	1.03308	0.000396	0.008448	1.01851	+
Q9EP97	Sentrin-specific protease 3	Senp3	1.00592	1.04855	1.00014	0.000225	0.008448	1.0182	+
Q9D8Z6	Autophagy-related protein 101	Atg101	0.934825	1.02243	1.09679	0.002107	0.013208	1.01801	+
Q60848	Lymphocyte-specific helicase	Hells	0.965361	1.07172	1.0133	0.000914	0.009951	1.01679	+
A2ARP8	Microtubule-associated protein 1A;MAP1A heavy chain;MAP1 light chain LC2	Map1a	1.0507	1.03248	0.95522	0.000834	0.009951	1.0128	+
Q8BIW1	Protein prune homolog	Prune	0.987125	1.00837	1.03973	0.000228	0.008448	1.01174	+
P27601	Guanine nucleotide-binding protein subunit alpha-13	Gna13	0.959403	0.991558	1.08126	0.001299	0.011139	1.01074	+
Q5I043	Ubiquitin carboxyl-terminal hydrolase 28	Usp28	1.0114	1.0024	1.00538	7e-06	0.006434	1.00639	+
Q99LN9	Deoxyhypusine hydroxylase	Dohh	0.898126	1.09724	1.02061	0.00331	0.015962	1.00532	+
G3XA21		Mroh1	0.990482	0.986299	1.03687	0.00026	0.008448	1.00455	+
Q91WM3	U3 small nucleolar RNA-interacting protein 2	Rrp9	1.22446	0.799482	0.971865	0.014931	0.038906	0.998602	+
D3YVL0	Putative helicase MOV-10	Mov10	1.07538	0.931817	0.979533	0.001793	0.012253	0.995578	+
Q91YK2	Ribosomal RNA processing protein 1 homolog B	Rrp1b	1.12011	0.94974	0.904485	0.004355	0.018253	0.991445	+
E9Q5B0	Calmodulin-regulated spectrin-associated protein 3	Camsap3	1.03119	0.927352	1.0048	0.000994	0.010212	0.98778	+
P97931	Uracil-DNA glycosylase	Ung	0.957346	1.06231	0.93523	0.00158	0.011805	0.984963	+
Q923D2	Flavin reductase (NADPH)	Blvrb	1.03035	0.964079	0.95781	0.000556	0.009124	0.984079	+
F8VPV0	Pericentrin	Pcnt	0.992492	0.918278	1.01805	0.000938	0.010042	0.976275	+
Q8K4L0	ATP-dependent RNA helicase DDX54	Ddx54	1.18399	0.805245	0.935004	0.012749	0.034668	0.974746	+
O35387	HCLS1-associated protein X-1	Hax1	0.925036	1.0125	0.97267	0.000679	0.009457	0.970069	+
Q6PCN7	Helicase-like transcription factor	Hltf	0.659474	1.09381	1.15186	0.024786	0.054839	0.96838	+
Q8C2Q3	RNA-binding protein 14	Rbm14	0.886128	1.00231	0.995397	0.001529	0.011608	0.961278	+
Q9Z1S0	Mitotic checkpoint serine/threonine-protein kinase BUB1 beta	Bub1b	0.870392	1.01604	0.992223	0.002203	0.013477	0.959552	+
Q8VE99	Coiled-coil domain-containing protein 115	Ccdc115	0.919714	1.05768	0.89764	0.002719	0.014732	0.958344	+
E9PXY8	Ubiquitin carboxyl-terminal hydrolase	Usp7	0.991631	0.953738	0.921191	0.000453	0.0087	0.95552	+
Q8K4R9	Disks large-associated protein 5	Dlgap5	0.92804	0.946735	0.972889	0.000188	0.008377	0.949221	+
Q91XI1	tRNA-dihydrouridine(47) synthase [NAD(P)(+)]-like	Dus3l	0.884171	1.15636	0.806883	0.012241	0.034077	0.949139	+
Q8CFA2	Aminomethyltransferase, mitochondrial	Amt	1.03435	0.941713	0.857302	0.002918	0.015003	0.944454	+
P58137	Acyl-coenzyme A thioesterase 8	Acot8	1.31742	0.564187	0.94943	0.049214	0.089035	0.943679	+
Q8BTS0	Probable ATP-dependent RNA helicase DDX5	Ddx5	0.901288	0.974347	0.942721	0.000507	0.009019	0.939452	+
Q6P9J9	Anoctamin-6	Ano6	0.875172	NA	1.00122	0.042701	0.080162	0.938196	+
Q9JIB0	Ran guanine nucleotide release factor	Rangrf;Gm10355	0.883861	0.926132	0.996405	0.001229	0.01097	0.935466	+
E9PV41	Protein diaphanous homolog 1	Diap1;Diaph1	0.954206	0.990391	0.860945	0.001696	0.012053	0.935181	+
Q61235	Beta-2-syntrophin	Sntb2	NA	0.950841	0.918382	0.011054	0.03186	0.934612	+
Q8BNU0	Armadillo repeat-containing protein 6	Armc6	0.929739	0.931209	0.938081	8e-06	0.006434	0.93301	+
P97473	RISC-loading complex subunit TARBP2	Tarbp2	0.979907	0.963583	0.838229	0.002321	0.013815	0.92724	+
B9EJX5	Transcription initiation factor TFIID subunit 2	Taf2	0.939596	0.861752	0.974718	0.001299	0.011139	0.925355	+
Q9D1R2	Protein KTI12 homolog	Kti12	0.948202	0.895601	0.931093	0.00028	0.008448	0.924965	+
Q8R3F5	Malonyl-CoA-acyl carrier protein transacylase, mitochondrial	Mcat	1.06405	0.937783	0.769795	0.008403	0.026952	0.923876	+
Q8BFP9	[Pyruvate dehydrogenase (acetyl-transferring)] kinase isozyme 1, mitochondrial	Pdk1	0.961359	0.958321	0.84176	0.001824	0.012328	0.92048	+
Q3V116	Polyhomeotic-like protein 1	Phc1	0.978169	0.874249	0.903257	0.001134	0.010695	0.918558	+
P54276	DNA mismatch repair protein Msh6	Msh6	0.9484	0.943724	0.857302	0.001043	0.010373	0.916475	+
Q99NF8	Ran-binding protein 17	Ranbp17	0.914978	0.92165	0.907092	2.1e-05	0.007817	0.914573	+
A0A023T672	RNA-binding protein 8A	RBM8;Rbm8a	0.952044	0.866637	0.924979	0.000758	0.009829	0.914553	+
Q6PR54	Telomere-associated protein RIF1	Rif1	0.997266	0.782952	0.96224	0.005231	0.020148	0.914153	+
P10852	4F2 cell-surface antigen heavy chain	Slc3a2	0.930538	0.939497	0.871031	0.000552	0.009124	0.913689	+
Q6QI06	Rapamycin-insensitive companion of mTOR	Rictor	0.904748	0.975527	0.86047	0.001342	0.011333	0.913582	+
P23591	GDP-L-fucose synthase	Tsta3	0.818784	1.00578	0.914349	0.003478	0.016284	0.91297	+
Q8BHX3	Borealin	Cdca8	1.24049	0.713102	0.77484	0.031906	0.065403	0.909479	+
Q9DB34	Charged multivesicular body protein 2a	Chmp2a	0.968671	0.937581	0.820366	0.002459	0.014172	0.908872	+
Q6ZPE2	Myotubularin-related protein 5	Sbf1	0.883552	0.911718	0.925886	0.000188	0.008377	0.907052	+
Q9EPB4	Apoptosis-associated speck-like protein containing a CARD	Pycard	0.869871	0.918483	0.93049	0.000418	0.008448	0.906281	+
Q6ZPY2	Protein SMG5	Smg5	0.792545	0.988833	0.906632	0.00401	0.017571	0.896004	+
Q64674	Spermidine synthase	Srm	0.837009	0.95224	0.895171	0.001379	0.011333	0.894807	+
P47738	Aldehyde dehydrogenase, mitochondrial	Aldh2	0.816192	0.99854	0.86513	0.0037	0.01684	0.893287	+
B2RWS6	Histone acetyltransferase p300	Ep300	0.870079	0.884859	0.923692	0.00032	0.008448	0.892877	+
G8JL68	Myelin expression factor 2	Myef2	0.811429	0.963088	0.899258	0.002424	0.014071	0.891258	+
P97287	Induced myeloid leukemia cell differentiation protein Mcl-1 homolog	Mcl1	1.05042	0.867696	0.753786	0.009279	0.028429	0.890636	+
O88986	2-amino-3-ketobutyrate coenzyme A ligase, mitochondrial	Gcat	0.805996	0.971589	0.892311	0.002874	0.014958	0.889966	+
Q5DU37	Zinc finger FYVE domain-containing protein 26	Zfyve26	0.912048	0.87604	0.875187	0.000187	0.008377	0.887758	+
Q8K389	CDK5 regulatory subunit-associated protein 2	Cdk5rap2	1.00212	0.783289	0.875265	0.005077	0.019737	0.886892	+
Q8CI11	Guanine nucleotide-binding protein-like 3	Gnl3	1.22788	0.517286	0.911451	0.049877	0.08985	0.885537	+
Q4FK66	Pre-mRNA-splicing factor 38A	Prpf38a	0.995168	0.860369	0.8003	0.004209	0.017869	0.885279	+
D3Z442	Mth938 domain-containing protein	Aamdc	0.887981	0.934651	0.824994	0.001294	0.011139	0.882542	+
Q62176	RNA-binding protein 38	Rbm38	0.936318	0.915822	0.795261	0.002477	0.014202	0.882467	+
Q8CH25	SAFB-like transcription modulator	Sltm	0.762796	0.883079	1.00136	0.006036	0.021835	0.882413	+
G5E8R3	Pyruvate carboxylase;Pyruvate carboxylase, mitochondrial	Pcx;Pc	0.768281	0.998927	0.878472	0.005655	0.020983	0.881893	+
Q9D7V9	N-acylethanolamine-hydrolyzing acid amidase;N-acylethanolamine-hydrolyzing acid amidase subunit alpha;N-acylethanolamine-hydrolyzing acid amidase subunit beta	Naaa	0.884686	0.950941	0.797659	0.002547	0.014307	0.877762	+
P97868	E3 ubiquitin-protein ligase RBBP6	Rbbp6	0.97207	0.681393	0.972231	0.012041	0.033698	0.875231	+
Q9D0S9	Histidine triad nucleotide-binding protein 2, mitochondrial	Hint2	0.899555	1.03059	0.693696	0.012336	0.034094	0.874613	+
Q9Z127	Large neutral amino acids transporter small subunit 1	Slc7a5	0.91316	0.879406	0.819715	0.000983	0.010212	0.87076	+
Q6PCM1	Lysine-specific demethylase 3A	Kdm3a	0.813596	0.864939	0.933501	0.001588	0.011805	0.870679	+
D6RHA2	N-acylglucosamine 2-epimerase	Renbp	0.827604	0.750806	1.03027	0.009065	0.028168	0.86956	+
P48962	ADP/ATP translocase 1	Slc25a4	0.819215	0.880561	0.899027	0.000775	0.009829	0.866268	+
Q99J93	Interferon-induced transmembrane protein 2	Ifitm2	0.712698	0.998637	0.884553	0.009098	0.028179	0.865296	+
Q3UVG3	Protein FAM91A1	Fam91a1	0.768169	0.940706	0.885253	0.003441	0.016236	0.864709	+
Q61188	Histone-lysine N-methyltransferase EZH2	Ezh2	0.922829	0.933134	0.73069	0.005779	0.021363	0.862218	+
A2A7A7	GDH/6PGL endoplasmic bifunctional protein;Glucose 1-dehydrogenase;6-phosphogluconolactonase	H6pd	0.889111	0.745397	0.950546	0.00494	0.019488	0.861685	+
P70423	Cationic amino acid transporter 3	Slc7a3	0.842857	0.991849	0.743872	0.006957	0.023868	0.859526	+
E9QAU4	Sickle tail protein	Etl4;Skt	0.804145	0.864409	0.885641	0.000821	0.009951	0.851398	+
P97314	Cysteine and glycine-rich protein 2	Csrp2	0.866848	0.828071	0.849751	0.000175	0.008377	0.848223	+
P83741	Serine/threonine-protein kinase WNK1	Wnk1	0.83669	0.845171	0.860233	6.6e-05	0.007925	0.847364	+
P49135	TFIIH basal transcription factor complex helicase XPB subunit	Ercc3	0.839032	0.795144	0.90272	0.001361	0.011333	0.845632	+
A2APB8	Targeting protein for Xklp2	Tpx2	0.862563	0.78699	0.886108	0.001249	0.011021	0.84522	+
Q8BGQ7	Alanine--tRNA ligase, cytoplasmic	Aars	0.816516	0.881401	0.834368	0.000525	0.009068	0.844095	+
F8VPY2	Transcription initiation factor TFIID subunit 5	Taf5	0.92914	0.80148	0.801125	0.00254	0.014307	0.843915	+
E9Q5C9		Nolc1	0.96799	0.782839	0.780453	0.005376	0.020385	0.843761	+
P35761	Dual specificity protein kinase TTK	Ttk	0.788034	0.859091	0.863552	0.000853	0.009951	0.836892	+
G3X9G4	Dynamin-2	Dnm2	0.819431	0.840537	0.845841	9.3e-05	0.008117	0.83527	+
Q0VF62	Breast carcinoma-amplified sequence 3 homolog	Bcas3	0.853323	0.875724	0.771731	0.001434	0.011333	0.833593	+
Q8K1L5	Protein phosphatase 1 regulatory subunit 11	Ppp1r11	0.714091	0.997185	0.788458	0.010184	0.030174	0.833245	+
P60330	Separin	Espl1	0.839883	0.872772	0.779617	0.001076	0.010459	0.830757	+
Q9DBE9	pre-rRNA processing protein FTSJ3	Ftsj3	1.06423	0.642795	0.777356	0.021788	0.050038	0.828128	+
Q3UMT1	Protein phosphatase 1 regulatory subunit 12C	Ppp1r12c	0.736309	1.08563	0.647224	0.025418	0.055801	0.823055	+
Q3UH60	Disco-interacting protein 2 homolog B	Dip2b	0.813704	0.836105	0.819064	6.7e-05	0.007925	0.822958	+
F8WIT2	Annexin	Anxa6	0.758415	0.882974	0.819064	0.001917	0.012535	0.820151	+
Q9D1L0	Coiled-coil-helix-coiled-coil-helix domain-containing protein 2	Chchd2;Zbed5	0.832848	0.821086	0.80269	0.000115	0.008117	0.818875	+
Q9ER72	Cysteine--tRNA ligase, cytoplasmic	Cars	0.883758	0.790682	0.772152	0.001788	0.012239	0.815531	+
Q9DCD0	6-phosphogluconate dehydrogenase, decarboxylating	Pgd	0.810452	0.864196	0.752849	0.001575	0.011805	0.809166	+
P20060	Beta-hexosaminidase subunit beta	Hexb	0.851426	0.785981	0.783877	0.000754	0.009829	0.807095	+
Q80UV9	Transcription initiation factor TFIID subunit 1	Taf1	0.852691	0.783289	0.779952	0.000866	0.009951	0.80531	+
Q64127	Transcription intermediary factor 1-alpha	Trim24	0.939397	0.752872	0.722966	0.007	0.023968	0.805079	+
E9QKD1	Nucleolar protein 8	Nol8	0.905358	0.750576	0.758803	0.003879	0.017247	0.804912	+
Q9DCC4	Pyrroline-5-carboxylate reductase 3	Pycrl	0.69235	0.912437	0.805569	0.006197	0.022138	0.803452	+
Q8BW10	RNA-binding protein NOB1	Nob1	0.633211	0.900165	0.87683	0.011101	0.031911	0.803402	+
Q6P9Q6	FK506-binding protein 15;Peptidyl-prolyl cis-trans isomerase	Fkbp15	NA	0.760536	0.844322	0.033206	0.067215	0.802429	+
E9PUF7	Rho guanine nucleotide exchange factor 1	Arhgef1	0.741099	0.834155	0.830739	0.00144	0.01134	0.801998	+
Q9WTI7	Unconventional myosin-Ic	Myo1c	0.865491	0.719572	0.813518	0.00284	0.014874	0.799527	+
A2A9Q2	Nardilysin	Nrd1	0.806432	0.809663	0.78037	0.000135	0.008377	0.798821	+
Q8BP47	Asparagine--tRNA ligase, cytoplasmic	Nars	0.820509	0.75711	0.809344	0.000603	0.009164	0.795654	+
E9QML5	Zinc finger protein 638	Zfml;Znf638	0.780076	0.790905	0.814906	0.000167	0.008377	0.795296	+
G3UYW1	WD repeat and FYVE domain-containing protein 3	Wdfy3	0.733679	0.76782	0.882529	0.003194	0.015709	0.794676	+
E9QK36	WD repeat-containing protein 62	Wdr62	0.682779	0.848073	0.845921	0.004741	0.018984	0.792258	+
Q5RJG1	Nucleolar protein 10	Nol10	0.64786	0.811536	0.910076	0.009244	0.028376	0.789824	+
A2A8R7	Terminal uridylyltransferase 4	Zcchc11	0.912857	0.678376	0.778026	0.00732	0.024595	0.789753	+
Q8CEC2	Aryl hydrocarbon receptor nuclear translocator	Arnt	0.777303	0.794364	0.787793	4e-05	0.007925	0.786487	+
Q99JW2	Aminoacylase-1	Acy1	0.736423	0.910176	0.711259	0.006271	0.022291	0.785953	+
Q9WU84	Copper chaperone for superoxide dismutase	Ccs	0.907389	0.876356	0.573957	0.017824	0.043653	0.785901	+
Q6ZQA6	Immunoglobulin superfamily member 3	Igsf3	0.732534	0.954835	0.66979	0.011897	0.033342	0.78572	+
Q3V0C5	Ubiquitin carboxyl-terminal hydrolase 48	Usp48	0.819647	0.826546	0.707746	0.002399	0.014037	0.784646	+
Q5KU39	Vacuolar protein sorting-associated protein 41 homolog	Vps41	0.925637	0.745167	0.679418	0.008712	0.027465	0.783407	+
Q99KI0	Aconitate hydratase, mitochondrial	Aco2	0.781738	0.766003	0.800383	0.000161	0.008377	0.782708	+
Q9DBR0	A-kinase anchor protein 8	Akap8	0.761898	0.807787	0.777356	0.000297	0.008448	0.782347	+
P54923	[Protein ADP-ribosylarginine] hydrolase	Adprh	0.733221	0.864939	0.745158	0.002887	0.014958	0.781106	+
E9QN31	Probable 28S rRNA (cytosine-C(5))-methyltransferase	Nop2	1.08627	0.591766	0.659643	0.037258	0.072647	0.779227	+
P45952	Medium-chain specific acyl-CoA dehydrogenase, mitochondrial	Acadm	0.826853	0.84979	0.660461	0.005813	0.021398	0.779035	+
Q8VC88	Grancalcin	Gca	0.874653	0.764069	0.697243	0.004385	0.018267	0.778655	+
Q8BQ33	Treslin	Ticrr	0.697053	0.842802	0.795922	0.00303	0.01523	0.778593	+
Q922S8	Kinesin-like protein KIF2C;Kinesin-like protein	Kif2c	0.774858	0.773146	0.784878	2.2e-05	0.007817	0.777627	+
F8WJ40	Histone-lysine N-methyltransferase;Histone-lysine N-methyltransferase 2B	Kmt2b	0.739504	0.773485	0.81882	0.000873	0.009951	0.777269	+
A0A0A0MQ68	Glutaryl-CoA dehydrogenase, mitochondrial	Gcdh	0.816408	0.736028	NA	0.032933	0.06702	0.776218	+
Q8C6B9	Active regulator of SIRT1	Rps19bp1	0.656338	0.866318	0.792693	0.006292	0.022328	0.771783	+
G3X9J6	Cytosolic purine 5-nucleotidase	Nt5c2	0.727831	0.876356	0.709767	0.004649	0.018816	0.771318	+
E9QMN5	Transcriptional repressor p66 alpha	Gatad2a	0.852691	0.769068	0.689694	0.00371	0.016864	0.770484	+
Q8K368	Fanconi anemia group I protein homolog	Fanci	0.798357	0.713219	0.796832	0.001334	0.011333	0.769469	+
Q61070	Etoposide-induced protein 2.4	Ei24	0.784502	0.631485	0.890143	0.009406	0.028693	0.76871	+
O08582	GTP-binding protein 1	Gtpbp1	0.721035	0.80624	0.778613	0.001065	0.010441	0.768629	+
A2A7S7	Tyrosine--tRNA ligase;Tyrosine--tRNA ligase, cytoplasmic;Tyrosine--tRNA ligase, cytoplasmic, N-terminally processed	Yars	0.701975	0.826655	0.77484	0.002211	0.013489	0.767823	+
D3Z0M9		Ddx23	0.830603	0.708496	0.761177	0.00212	0.013209	0.766759	+
P27641	X-ray repair cross-complementing protein 5	Xrcc5	0.77808	0.827635	0.683358	0.003063	0.015339	0.763024	+
Q9CQA3	Succinate dehydrogenase [ubiquinone] iron-sulfur subunit, mitochondrial	Sdhb	0.737108	0.789452	0.757699	0.0004	0.008448	0.76142	+
Q9CWY6	RNA-binding protein with multiple splicing 2	Rbpms2	0.981643	0.714398	0.573089	0.024177	0.053944	0.756376	+
E0CXS2	Transducin-like enhancer protein 3	Tle3	0.793534	0.729281	0.74207	0.000676	0.00945	0.754962	+
P26443	Glutamate dehydrogenase 1, mitochondrial	Glud1	0.72265	0.807124	0.733543	0.001234	0.01097	0.754439	+
B2RRI2	Protein strawberry notch homolog 1	Sbno1	0.762235	0.746204	0.754212	3.8e-05	0.007925	0.754217	+
P56213	FAD-linked sulfhydryl oxidase ALR	Gfer	0.735738	0.739621	0.787044	0.000478	0.0087	0.754134	+
Q91ZZ2		Rapgef1	0.678029	0.699359	0.879643	0.007147	0.024226	0.752344	+
Q7TSH3	Zinc finger protein 516	Znf516	0.743829	0.684282	0.828881	0.003096	0.015425	0.752331	+
O88307	Sortilin-related receptor	Sorl1	0.791666	0.768955	0.694672	0.001514	0.011562	0.751764	+
E9Q7C4		Prr14l	0.679099	0.834697	0.741211	0.0036	0.016614	0.751669	+
E9PZ88	Alpha-mannosidase;Alpha-mannosidase 2C1	Man2c1	0.848998	0.799482	0.604978	0.009687	0.029212	0.751153	+
Q00547	Hyaluronan mediated motility receptor	Hmmr	0.790126	0.770088	0.691296	0.001611	0.011874	0.750504	+
E9Q5G3	Kinesin-like protein KIF23	Kif23	0.688222	0.845386	0.716863	0.004125	0.017809	0.750157	+
Q6P9P6	Kinesin-like protein KIF11	Kif11	0.734709	0.723089	0.783043	0.000603	0.009164	0.746947	+
F6TVX7	Phosphatidylserine decarboxylase proenzyme;Phosphatidylserine decarboxylase alpha chain;Phosphatidylserine decarboxylase beta chain	Gm20671;Pisd	0.671114	0.805135	0.762363	0.002794	0.014796	0.746204	+
Q8VDG5	Phosphopantothenate--cysteine ligase	Ppcs	0.735166	0.806682	0.686396	0.002204	0.013477	0.742748	+
Q8CGC6	RNA-binding protein 28	Rbm28	0.975558	0.641928	0.604695	0.024413	0.054327	0.740727	+
Q80U93	Nuclear pore complex protein Nup214	Nup214	0.738706	0.728115	0.755063	0.000112	0.008117	0.740628	+
Q9DD02	Protein Hikeshi	L7rn6	0.72875	0.680307	0.806226	0.002457	0.014172	0.738428	+
Q9DB96	Neuroguidin	Ngdn	0.815868	0.860475	0.537315	0.018263	0.044521	0.737886	+
Q3U5F4	YrdC domain-containing protein, mitochondrial	Yrdc	0.809584	0.718632	0.683716	0.002579	0.01436	0.737311	+
Q78JE5	F-box only protein 22	Fbxo22	0.733793	0.76532	0.704136	0.000578	0.009164	0.734417	+
Q80YS6	Actin filament-associated protein 1	Afap1	0.790346	0.481186	0.926642	0.030856	0.063962	0.732725	+
B7ZP47	Wings apart-like protein homolog	Wapal	0.692586	0.778789	0.724793	0.001178	0.010804	0.732056	+
E9Q412		Brd1	0.765821	0.708377	0.717125	0.000598	0.009164	0.730441	+
H3BKS8	tRNA (guanine(26)-N(2))-dimethyltransferase	Trmt1	0.793534	0.776309	0.596549	0.007522	0.025096	0.722131	+
Q5SW19	Clustered mitochondria protein homolog	Cluh	0.633947	0.774276	0.749436	0.003594	0.016614	0.71922	+
O88735	Ensconsin	Map7	0.731961	0.789341	0.636178	0.003837	0.017112	0.71916	+
Q9DBH0	NEDD4-like E3 ubiquitin-protein ligase WWP2	Wwp2	0.702092	0.573439	0.877221	0.01472	0.03857	0.717584	+
Q9CYN9	Renin receptor	Atp6ap2	0.679218	0.726714	0.740093	0.000666	0.009406	0.715342	+
Q9WVK4	EH domain-containing protein 1	Ehd1	0.662603	0.750691	0.723923	0.001337	0.011333	0.712406	+
Q9CY64	Biliverdin reductase A	Blvra	0.687868	0.769748	0.679328	0.001633	0.011911	0.712315	+
F7BJB9		Morc3	0.783065	0.722972	0.630344	0.003868	0.017215	0.712127	+
Q3TC46	Protein PAT1 homolog 1	Patl1	0.708861	0.783401	0.643736	0.003196	0.015709	0.711999	+
Q9ESW8	Pyroglutamyl-peptidase 1	Pgpep1	0.743261	0.746089	0.646399	0.002112	0.013209	0.711916	+
Q9Z2V5	Histone deacetylase 6	Hdac6	0.723803	0.746435	0.657732	0.001404	0.011333	0.709323	+
Q8K3X4	Interferon regulatory factor 2-binding protein-like	Irf2bpl	0.761786	0.708969	0.655819	0.001857	0.012352	0.708858	+
F2Z470	3-hydroxy-3-methylglutaryl coenzyme A reductase;3-hydroxy-3-methylglutaryl-coenzyme A reductase	Hmgcr	0.761898	0.739158	0.625046	0.00355	0.01653	0.708701	+
Q3TRM4	Neuropathy target esterase	Pnpla6	0.670636	0.680549	0.768868	0.001946	0.012626	0.706684	+
P21619	Lamin-B2	Lmnb2	0.802945	0.623478	0.693074	0.005423	0.020463	0.706499	+
Q8VBT9	Tether containing UBX domain for GLUT4	Aspscr1	0.759202	0.703282	0.651802	0.001931	0.012566	0.704762	+
A0A0A0MQ99	DNA repair protein SWI5 homolog	Swi5	0.694586	0.738347	0.680493	0.000611	0.009238	0.704476	+
Q9WV96	Mitochondrial import inner membrane translocase subunit Tim10 B	Timm10b	0.744056	0.685845	0.6813	0.000823	0.009951	0.703734	+
Q91WF7	Polyphosphoinositide phosphatase	Fig4	0.755149	0.628613	0.723401	0.002916	0.015003	0.702388	+
Q62383	Transcription elongation factor SPT6	Supt6h	0.750971	0.628613	0.724097	0.002791	0.014796	0.701227	+
Q9CPY7	Cytosol aminopeptidase	Lap3	0.668362	0.753789	0.680045	0.001453	0.01136	0.700732	+
A2A5R2	Brefeldin A-inhibited guanine nucleotide-exchange protein 2	Arfgef2	0.673621	0.751151	0.674297	0.00135	0.011333	0.69969	+
Q8VCL2	Protein SCO2 homolog, mitochondrial	Sco2	0.756163	0.612142	0.730084	0.003988	0.017511	0.699463	+
Q9D2Q2	Probable tRNA (uracil-O(2)-)-methyltransferase	Trmt44	0.751649	0.645763	NA	0.048147	0.08765	0.698706	+
P43247	DNA mismatch repair protein Msh2	Msh2	0.722189	0.726831	0.646858	0.001374	0.011333	0.698626	+
Q07076	Annexin A7	Anxa7	0.612325	0.746089	0.736046	0.003774	0.016976	0.698153	+
Q9D0E1	Heterogeneous nuclear ribonucleoprotein M	Hnrnpm	0.595168	0.736956	0.76194	0.005489	0.0206	0.698021	+
Q99J56	Derlin-1	Derl1	0.720804	0.682477	0.685057	0.000316	0.008448	0.696112	+
Q8VC65	Nurim	Nrm	0.780187	0.558686	0.744815	0.009643	0.029194	0.694563	+
B1AT92	Growth factor receptor-bound protein 2	Grb2	0.649802	0.747586	0.685593	0.001688	0.012053	0.694327	+
Q99L47	Hsc70-interacting protein	St13	0.656338	0.738926	0.681569	0.001244	0.011021	0.692277	+
D3YWI4	Protein Mpv17	Mpv17	0.674575	0.765207	0.633866	0.003139	0.015573	0.691216	+
A2AJ72		Fubp3	0.790676	0.713102	0.569512	0.008674	0.027405	0.691097	+
Q9D0F9	Phosphoglucomutase-1	Pgm1	0.639333	0.704469	0.719394	0.001275	0.011087	0.687732	+
Q61425	Hydroxyacyl-coenzyme A dehydrogenase, mitochondrial	Hadh	0.695527	0.697096	0.666174	0.000215	0.008448	0.686265	+
Q91VW5	Golgin subfamily A member 4	Golga4	0.679812	0.667709	0.707042	0.000288	0.008448	0.684854	+
Q62318	Transcription intermediary factor 1-beta	Trim28	0.678148	0.723206	0.652351	0.000913	0.009951	0.684568	+
P97770	THUMP domain-containing protein 3	Thumpd3	0.601704	0.685725	0.762109	0.004566	0.018621	0.683179	+
Q09XV5	Chromodomain-helicase-DNA-binding protein 8	Chd8	0.686686	0.67184	0.688982	6.2e-05	0.007925	0.682502	+
Q9JLZ6	Hypermethylated in cancer 2 protein	Hic2	0.438145	0.739505	0.869067	0.03327	0.06723	0.682239	+
A0A0A0MQ80	Spermatogenesis-associated protein 5	Spata5	0.643481	0.693754	0.708361	0.000829	0.009951	0.681865	+
Q8C0P0	Serine/threonine-protein kinase greatwall	Mastl	0.687868	0.725312	0.617857	0.002157	0.013334	0.677012	+
F8VQ29		Iqgap3	0.645064	0.734054	0.651528	0.001786	0.012239	0.676882	+
Q99MR1	PERQ amino acid-rich with GYF domain-containing protein 1	Gigyf1	0.614936	0.482432	0.932222	0.036775	0.071837	0.67653	+
Q6NV99		Haus6	0.607336	0.694232	0.726877	0.002772	0.014789	0.676148	+
Q8VDP3	Protein-methionine sulfoxide oxidase MICAL1	Mical1	0.560102	0.73626	0.731555	0.00727	0.024504	0.675972	+
J3QJU5	Lethal(2) giant larvae protein homolog 2	Llgl2	0.698461	0.651557	0.674027	0.000403	0.008448	0.674682	+
Q9JMH6	Thioredoxin reductase 1, cytoplasmic	Txnrd1	0.748141	0.598803	0.674927	0.004067	0.017657	0.673957	+
Q3V300	Kinesin-like protein KIF22	Kif22	0.527466	0.670504	0.823778	0.015737	0.040072	0.673916	+
Q9R061	Cytosolic Fe-S cluster assembly factor NUBP2	Nubp2	0.514069	0.768047	0.737339	0.013843	0.036802	0.673152	+
Q9QXS1	Plectin	Plec	0.796166	0.525501	0.691741	0.013511	0.036139	0.671136	+
E9Q507	GON-4-like protein	Gon4l	0.633947	0.674385	0.703166	0.000895	0.009951	0.670499	+
Q9D071	MMS19 nucleotide excision repair protein homolog	Mms19	0.611204	0.699478	0.698571	0.001905	0.012495	0.669751	+
Q3U3J1	2-oxoisovalerate dehydrogenase subunit alpha, mitochondrial	Bckdha	0.680406	0.773937	0.551104	0.00921	0.028376	0.668482	+
Q9CR95	Adaptin ear-binding coat-associated protein 1	Necap1	0.630386	NA	0.704136	0.035146	0.069747	0.667261	+
Q9DCH2	Ribonuclease P protein subunit p20	Pop7	0.610581	0.753445	0.635623	0.004338	0.018253	0.66655	+
A2A9K3	Centrosomal protein of 85 kDa	Cep85	0.651378	0.696619	0.650614	0.000521	0.009068	0.666204	+
B2RXW8		Ppfia1	0.741327	0.70435	0.550123	0.007658	0.025348	0.665267	+
E9PWV3	Ribosomal protein S6 kinase;Ribosomal protein S6 kinase alpha-1	Rps6ka1	0.455042	0.736956	0.803348	0.024815	0.054846	0.665115	+
Q99LB6	Methionine adenosyltransferase 2 subunit beta	Mat2b	0.729897	0.692319	0.569222	0.005301	0.020263	0.663813	+
Q61133	Glutathione S-transferase theta-2	Gstt2	0.588729	0.654385	0.740179	0.00437	0.018262	0.661098	+
Q6NZQ4	PAX-interacting protein 1	Paxip1	0.621384	0.612648	0.747982	0.004352	0.018253	0.660671	+
Q8BLH7	HIRA-interacting protein 3	Hirip3	0.725415	0.617191	0.639132	0.002491	0.014224	0.660579	+
F8WHU7	Cohesin subunit SA-1	Stag1	0.936019	0.495378	0.549044	0.041479	0.078493	0.660147	+
Q00612	Glucose-6-phosphate 1-dehydrogenase X;Glucose-6-phosphate 1-dehydrogenase	G6pdx	0.614688	0.700787	0.664181	0.001426	0.011333	0.659885	+
Q6P5B5	Fragile X mental retardation syndrome-related protein 2	Fxr2	0.760101	0.588942	0.630159	0.006056	0.021835	0.659734	+
Q9D187	Mitotic spindle-associated MMXD complex subunit MIP18	Fam96b	0.623856	0.718045	0.634513	0.002037	0.01292	0.658805	+
Q3UEB3	Poly(U)-binding-splicing factor PUF60	Puf60	0.634315	0.692439	0.643919	0.000749	0.009829	0.656891	+
Q8R3U1	HRAS-like suppressor 3	Pla2g16	0.689993	0.703163	0.572799	0.003974	0.017466	0.655318	+
Q60520	Paired amphipathic helix protein Sin3a	Sin3a	0.662122	0.644279	0.649882	6.5e-05	0.007925	0.652094	+
E9PWG2		Trappc8	0.616675	0.653279	0.680314	0.000804	0.009951	0.650089	+
Q6P5E3	Sal-like protein 1	Sall1	0.739048	0.506578	0.701842	0.01211	0.033735	0.649156	+
Q6A068	Cell division cycle 5-like protein	Cdc5l	0.769844	0.532734	0.641251	0.011002	0.031784	0.647943	+
G5E870	E3 ubiquitin-protein ligase TRIP12	Trip12	0.737223	0.583922	0.615047	0.005213	0.020118	0.645397	+
Q8K183	Pyridoxal kinase	Pdxk	0.579589	0.774841	0.577812	0.010148	0.030111	0.64408	+
P52480	Pyruvate kinase PKM	Pkm	0.613818	0.6632	0.651345	0.000536	0.009068	0.642787	+
Q6NVF4	DNA helicase B	Helb	0.645794	0.663322	0.617576	0.00043	0.008448	0.642231	+
A2A4P0	ATP-dependent RNA helicase DHX8	Dhx8	0.742919	0.543913	0.639501	0.007914	0.025892	0.642111	+
Q80TR8	Protein VPRBP	Vprbp	0.647253	0.667222	0.609598	0.000693	0.009628	0.641358	+
Q8VI33	Transcription initiation factor TFIID subunit 9	Taf9	0.633579	0.705654	0.5755	0.003461	0.016236	0.638245	+
Q6P9R4	Rho guanine nucleotide exchange factor 18	Arhgef18	0.838926	0.503036	0.570867	0.024903	0.054984	0.63761	+
F8WHT3	Protein PRRC2B	Prrc2b	0.548047	0.669654	0.68461	0.004619	0.018776	0.634104	+
P61982	14-3-3 protein gamma;14-3-3 protein gamma, N-terminally processed	Ywhag	0.634192	0.6965	0.565442	0.003567	0.016589	0.632045	+
Q9DBR7	Protein phosphatase 1 regulatory subunit 12A	Ppp1r12a	0.707813	0.619206	0.569028	0.004096	0.017726	0.632016	+
P29416	Beta-hexosaminidase subunit alpha	Hexa	0.616054	0.643166	0.636178	0.000165	0.008377	0.631799	+
Q9CQT1	Methylthioribose-1-phosphate isomerase	Mri1	0.658509	0.697096	0.539688	0.005574	0.020824	0.631765	+
Q91VI7	Ribonuclease inhibitor	Rnh1	0.678624	0.660756	0.548651	0.004151	0.01782	0.629344	+
Q8VCG3	WD repeat-containing protein 74	Wdr74	0.794302	0.391056	0.700517	0.035569	0.070291	0.628625	+
P51949	CDK-activating kinase assembly factor MAT1	Mnat1	0.672547	0.715928	0.49208	0.011745	0.03299	0.626852	+
D3YWX2	YLP motif-containing protein 1	Ylpm1	0.65259	0.590611	0.631921	0.000849	0.009951	0.625041	+
E9Q9L6	Neurobeachin-like protein 2	Nbeal2	0.606462	0.55211	0.714501	0.005792	0.021377	0.624358	+
Q8R3C6	Probable RNA-binding protein 19	Rbm19	0.718146	0.584953	0.569512	0.005665	0.021	0.624204	+
Q8VCB1	Nucleoporin NDC1	Ndc1	0.596805	0.773372	0.499413	0.016153	0.04081	0.623197	+
Q80U95	Ubiquitin-protein ligase E3C	Ube3c	0.557647	0.665639	0.643552	0.00279	0.014796	0.622279	+
Q9CXK8	60S ribosome subunit biogenesis protein NIP7 homolog	Nip7	0.835944	0.49716	0.530769	0.028793	0.060997	0.621291	+
Q9DBW3	Protein NATD1	Natd1	0.604836	0.678014	0.580215	0.002229	0.013569	0.621022	+
O54926	Apoptosis regulatory protein Siva	Siva1;Gm16380	0.691172	0.628238	0.542847	0.00476	0.018986	0.620752	+
Q9CQI9	Mediator of RNA polymerase II transcription subunit 30	Med30	0.567954	0.609611	0.681479	0.002851	0.014893	0.619681	+
Q00PI9	Heterogeneous nuclear ribonucleoprotein U-like protein 2	Hnrnpul2	0.784613	0.566538	0.507518	0.018002	0.044038	0.619556	+
Q9DBD5	Proline-, glutamic acid- and leucine-rich protein 1	Pelp1	0.618164	0.628238	0.611385	6.2e-05	0.007925	0.619262	+
Q8JZQ2	AFG3-like protein 2	Afg3l2	0.642994	0.604407	0.610162	0.000377	0.008448	0.619188	+
Q3UDE2	Tubulin--tyrosine ligase-like protein 12	Ttll12	0.596553	0.640937	0.619448	0.000428	0.008448	0.618979	+
Q80W00	Serine/threonine-protein phosphatase 1 regulatory subunit 10	Ppp1r10	0.74916	0.564971	0.542748	0.010986	0.031784	0.61896	+
E9Q7L1		Urb2	0.60396	0.629238	0.620382	0.000144	0.008377	0.61786	+
Q99MR6	Serrate RNA effector molecule homolog	Srrt	0.672667	0.617317	0.562236	0.002655	0.014598	0.617406	+
Q9D1K2	V-type proton ATPase subunit F	Atp6v1f	0.578315	0.696142	0.561554	0.004754	0.018986	0.612004	+
G3UY19	Protein regulator of cytokinesis 1	Prc1	0.70758	0.69184	0.434368	0.020353	0.047472	0.611263	+
P24270	Catalase	Cat	0.578952	0.691721	0.562916	0.004368	0.018262	0.611196	+
Q9CQU0	Thioredoxin domain-containing protein 12	Txndc12	0.534841	0.598675	0.695559	0.005821	0.02141	0.609692	+
P14873	Microtubule-associated protein 1B;MAP1B heavy chain;MAP1 light chain LC1	Map1b	0.68183	0.488093	0.656093	0.009814	0.029469	0.608672	+
Q9Z210	Peroxisomal membrane protein 11B	Pex11b	0.837435	0.524023	0.462992	0.034504	0.068858	0.60815	+
P56376	Acylphosphatase-1;Acylphosphatase	Acyp1	0.567055	0.628613	0.628301	0.001131	0.010695	0.60799	+
E9PZM7		Scaf11	0.655371	0.548149	0.619541	0.002679	0.014655	0.607687	+
E9QP99		Golga3	0.607586	0.632608	0.582327	0.00057	0.009164	0.607507	+
Q9R0X0	Mediator of RNA polymerase II transcription subunit 20	Med20;Gm20517	0.62027	0.754821	0.440943	0.021821	0.050078	0.605344	+
Q8BGD9	Eukaryotic translation initiation factor 4B	Eif4b	0.608835	0.638704	0.565539	0.001233	0.01097	0.604359	+
I1E4X7	Diphosphoinositol polyphosphate phosphohydrolase 1	Nudt3	0.52839	0.707076	0.573378	0.007827	0.025728	0.602948	+
Q60767	Lymphocyte antigen 75	Ly75	0.598188	0.681513	0.528879	0.005314	0.020267	0.60286	+
P27546	Microtubule-associated protein 4	Map4	0.594538	0.622348	0.589599	0.000286	0.008448	0.602162	+
Q6PAL7	AT-hook DNA-binding motif-containing protein 1	Ahdc1	0.650045	0.522274	0.633958	0.004424	0.018339	0.602093	+
P70122	Ribosome maturation protein SBDS	Sbds	0.546354	0.654876	0.598448	0.002717	0.014732	0.599893	+
P32037	Solute carrier family 2, facilitated glucose transporter member 3	Slc2a3	0.699165	0.492908	0.606299	0.009753	0.029367	0.599458	+
Q9WVL3	Solute carrier family 12 member 7	Slc12a7	0.519788	0.61429	0.663275	0.004904	0.019414	0.599117	+
Q3UUW5	Cyclin-H	Ccnh	0.621384	0.606694	0.565636	0.000778	0.009829	0.597905	+
Q9CPW2	Adrenodoxin-like protein, mitochondrial	Fdx1l	0.614688	0.578625	NA	0.019233	0.045937	0.596656	+
Q8BPG6	Sulfatase-modifying factor 2	Sumf2	0.599068	0.572139	0.616453	0.000468	0.0087	0.595887	+
Q9CQW9	Interferon-induced transmembrane protein 3	Ifitm3	0.400434	0.713102	0.66979	0.02602	0.05657	0.594442	+
Q9QYE6	Golgin subfamily A member 5	Golga5	0.618536	0.518636	0.644287	0.004138	0.017811	0.59382	+
E9PYK3		Parp4	0.611577	0.619835	0.549044	0.001415	0.011333	0.593485	+
E9Q4Y4		Cep192	0.655492	0.480771	0.643	0.008883	0.027818	0.593088	+
E9Q3G8		Nup153	0.597182	0.609231	0.57222	0.000338	0.008448	0.592877	+
Q5SQ20	Pescadillo homolog	Pes1	0.666085	0.520524	0.584627	0.005051	0.019705	0.590412	+
Q9D1M4	Eukaryotic translation elongation factor 1 epsilon-1	Eef1e1	0.541655	0.616813	0.607903	0.001617	0.011896	0.58879	+
Q99M87	DnaJ homolog subfamily A member 3, mitochondrial	Dnaja3	0.621012	0.561701	0.579254	0.000896	0.009951	0.587323	+
Q3U7R1	Extended synaptotagmin-1	Esyt1	0.762571	0.427154	0.568641	0.026427	0.057246	0.586122	+
Q8C804	Spindle and centriole-associated protein 1	Spice1	0.441372	0.518366	0.794433	0.031998	0.065558	0.584724	+
Q7TPD0	Integrator complex subunit 3	Ints3	0.625707	0.595609	0.530669	0.002298	0.013813	0.583995	+
Q61584	Fragile X mental retardation syndrome-related protein 1	Fxr1	0.656217	0.480494	0.614203	0.008139	0.026482	0.583638	+
Q9Z110	Delta-1-pyrroline-5-carboxylate synthase;Glutamate 5-kinase;Gamma-glutamyl phosphate reductase	Aldh18a1	0.548958	0.520659	0.680941	0.007089	0.024124	0.583519	+
Q921N6	Probable ATP-dependent RNA helicase DDX27	Ddx27	0.816084	0.401965	0.531166	0.041309	0.078318	0.583072	+
Q8CDM8	Protein FAM160B1	Fam160b1	0.532869	0.615804	0.600154	0.001899	0.012476	0.582943	+
Q9Z1F9	SUMO-activating enzyme subunit 2	Uba2	0.610082	0.617821	0.520192	0.002879	0.014958	0.582698	+
Q9CSH3	Exosome complex exonuclease RRP44	Dis3	-0.577872	-0.587555	-0.57885	2.8e-05	0.007925	-0.581426	+
P48774	Glutathione S-transferase Mu 5	Gstm5	-0.581228	-0.527536	-0.645383	0.003377	0.016075	-0.584716	+
P58854	Gamma-tubulin complex component 3	Tubgcp3	-0.835712	-0.417601	-0.515004	0.042978	0.08061	-0.589439	+
P32507	Nectin-2	Pvrl2	-0.581313	-0.719779	-0.46786	0.01492	0.038906	-0.589651	+
Q505D7	Optic atrophy 3 protein homolog	Opa3	-0.698844	-0.645969	-0.427297	0.019229	0.045937	-0.590704	+
Q8BH40	Syntaxin-7	Stx7	-0.619251	-0.594426	-0.569719	0.000578	0.009164	-0.594465	+
Q8R1A4	Dedicator of cytokinesis protein 7	Dock7	-0.613329	-0.584798	-0.585645	0.000248	0.008448	-0.594591	+
Q8BYH7	TBC1 domain family member 17	Tbc1d17	-0.646756	-0.348418	-0.789495	0.044548	0.082858	-0.59489	+
Q921K2	Poly [ADP-ribose] polymerase 1	Parp1	-0.803535	-0.367168	-0.614776	0.042235	0.079462	-0.595159	+
E9QLQ9	Adenomatous polyposis coli protein	Apc	-0.566864	-0.587642	-0.638592	0.001269	0.011082	-0.597699	+
B2RXP1	Leucine-rich repeat and calponin homology domain-containing protein 3	Lrch3	-0.736525	-0.430672	-0.633058	0.021677	0.049889	-0.600085	+
Q9JM76	Actin-related protein 2/3 complex subunit 3	Arpc3	-0.617294	-0.590521	-0.594466	0.000193	0.008426	-0.60076	+
P70245	3-beta-hydroxysteroid-Delta(8),Delta(7)-isomerase	Ebp	-0.66128	-0.549377	-0.594856	0.002902	0.014958	-0.601838	+
Q9D6V8	Polyadenylate-binding protein-interacting protein 2	Paip2	-0.65198	-0.549546	-0.611919	0.002422	0.014071	-0.604482	+
B1ATV0	Chloride channel protein;H(+)/Cl(-) exchange transporter 5	Clcn5	-0.695697	-0.499612	-0.621035	0.008789	0.027625	-0.605448	+
Q9R069	Basal cell adhesion molecule	Bcam	-0.602684	-0.495055	-0.718769	0.01119	0.031987	-0.605503	+
Q9DBF1	Alpha-aminoadipic semialdehyde dehydrogenase	Aldh7a1	-0.669581	-0.540072	-0.610121	0.003785	0.017006	-0.606591	+
Q9CQZ0	ORM1-like protein 2	Ormdl2	-0.677107	-0.533315	-0.614182	0.00465	0.018816	-0.608201	+
Q80ZQ9	Protein Simiate	Fam206a	-0.676681	-0.714568	-0.4372	0.0197	0.046474	-0.609483	+
P35951	Low-density lipoprotein receptor	Ldlr	-0.69798	-0.522668	-0.611546	0.006797	0.023529	-0.610731	+
Q8BWR2	PITH domain-containing protein 1	Pithd1	-0.6133	-0.649967	-0.569122	0.001461	0.01138	-0.610796	+
O70274	Protein tyrosine phosphatase type IVA 2;Protein tyrosine phosphatase type IVA 1	Ptp4a2;Ptp4a1	-0.614727	-0.602591	-0.618498	6.1e-05	0.007925	-0.611939	+
Q03145	Ephrin type-A receptor 2	Epha2	-0.53679	-0.62522	-0.680999	0.004638	0.018816	-0.614336	+
O88952	Protein lin-7 homolog C	Lin7c	-0.561237	-0.584943	-0.706506	0.005267	0.020202	-0.617562	+
G5E8K2	Ankyrin-3	Ank3	-0.826368	-0.582539	-0.443964	0.031227	0.064509	-0.617623	+
O35682	Myeloid-associated differentiation marker	Myadm	-0.401912	-0.845527	-0.612227	0.04016	0.076992	-0.619889	+
A0A087WS18	CLIP-associating protein 1	Clasp1	-0.68449	-0.606235	-0.575079	0.002727	0.014757	-0.621935	+
Q3THK7	GMP synthase [glutamine-hydrolyzing]	Gmps	-0.664896	-0.577742	-0.629209	0.00164	0.011913	-0.623949	+
Q07113	Cation-independent mannose-6-phosphate receptor	Igf2r	-0.683787	-0.581815	-0.607974	0.002389	0.014037	-0.624525	+
Q8CBM2	Aspartyl/asparaginyl beta-hydroxylase	Asph	-0.758539	-0.544801	-0.570572	0.011431	0.032472	-0.624637	+
P62874	Guanine nucleotide-binding protein G(I)/G(S)/G(T) subunit beta-1	Gnb1	-0.686204	-0.639903	-0.550555	0.004026	0.017574	-0.625554	+
P61161	Actin-related protein 2	Actr2	-0.593408	-0.596616	-0.693952	0.002749	0.014789	-0.627992	+
Q922M7	Ashwin		-0.700575	-0.413733	-0.769942	0.028837	0.060999	-0.628084	+
Q7TMY7	Importin-8	Ipo8	-0.60072	-0.633802	-0.650131	0.000535	0.009068	-0.628218	+
Q8BFY9	Transportin-1	Tnpo1	-0.669793	-0.601154	-0.618608	0.001068	0.010447	-0.629851	+
E9Q035		Gm20425	-0.629166	-0.610773	-0.650492	0.000332	0.008448	-0.630144	+
Q9CX13	Protein cornichon homolog 4	Cnih4	-0.623613	-0.607619	-0.667888	0.00081	0.009951	-0.63304	+
Q9DCT5	Stromal cell-derived factor 2	Sdf2	-0.721792	-0.436284	-0.758113	0.024457	0.054366	-0.63873	+
Q9D967	Magnesium-dependent phosphatase 1	Mdp1	-0.622324	-0.639451	-0.656184	0.000234	0.008448	-0.63932	+
O55091	Protein IMPACT	Impact	-0.628254	-0.659889	-0.637318	0.000215	0.008448	-0.64182	+
Q08943	FACT complex subunit SSRP1	Ssrp1	-0.660648	-0.469272	-0.803464	0.02183	0.050078	-0.644462	+
Q8VD57	Vesicle transport protein SFT2B	Sft2d2	-0.373849	-0.795152	-0.770187	0.041795	0.07884	-0.646396	+
E9PVX6		Mki67	-0.729187	-0.440317	-0.776053	0.025215	0.055471	-0.648519	+
Q62348	Translin	Tsn	-0.643572	-0.602268	-0.715393	0.002546	0.014307	-0.653744	+
Q61543	Golgi apparatus protein 1	Glg1	-0.659175	-0.628204	-0.683534	0.000593	0.009164	-0.656971	+
Q9WV54	Acid ceramidase;Acid ceramidase subunit alpha;Acid ceramidase subunit beta	Asah1	-0.653566	-0.667605	-0.651958	5.7e-05	0.007925	-0.657709	+
E9QL53	Citron Rho-interacting kinase	Cit	-0.654944	-0.6749	-0.645877	0.000169	0.008377	-0.658574	+
Q8BQ47	Protein canopy homolog 4	Cnpy4	-0.651502	-0.620844	-0.705944	0.001421	0.011333	-0.65943	+
P51660	Peroxisomal multifunctional enzyme type 2;(3R)-hydroxyacyl-CoA dehydrogenase;Enoyl-CoA hydratase 2	Hsd17b4	-0.697023	-0.626771	-0.655234	0.000955	0.010066	-0.659676	+
O35381	Acidic leucine-rich nuclear phosphoprotein 32 family member A	Anp32a	-0.722703	-0.589444	-0.666952	0.003413	0.016121	-0.6597	+
Q9CS42	Ribose-phosphate pyrophosphokinase 2	Prps2	-0.62335	-0.68904	-0.678974	0.000946	0.010042	-0.663788	+
Q3UJP5	Protein C8orf37 homolog	2610301B20Rik	-0.767064	-0.61829	-0.608587	0.005901	0.021555	-0.664647	+
Q80Y17	Lethal(2) giant larvae protein homolog 1	Llgl1	-0.658995	-0.678082	-0.698979	0.000289	0.008448	-0.678685	+
P52875	Transmembrane protein 165	Tmem165	-0.459915	-0.869693	-0.709955	0.029415	0.06182	-0.679854	+
Q9D1L9	Ragulator complex protein LAMTOR5	Lamtor5	-0.741448	-0.858576	-0.442578	0.031531	0.064916	-0.680867	+
Q3UGX2	Spectrin beta chain, erythrocytic	Sptb	-0.602193	-0.755227	-0.69068	0.004195	0.017869	-0.6827	+
Q5SS00	DBF4-type zinc finger-containing protein 2 homolog	Zdbf2	-0.671216	-0.733243	-0.645069	0.001462	0.01138	-0.683176	+
Q9D2V7	Coronin-7	Coro7	-0.82738	-0.595798	-0.636492	0.010639	0.031101	-0.686557	+
Q9CQM2	ER lumen protein-retaining receptor 2	Kdelr2	-0.72396	-0.700208	-0.638391	0.001373	0.011333	-0.687519	+
A2A8L5	Receptor-type tyrosine-protein phosphatase F	Ptprf	-0.729345	-0.67191	-0.687993	0.000603	0.009164	-0.696416	+
P59999	Actin-related protein 2/3 complex subunit 4	Arpc4	-0.721887	-0.640445	-0.731709	0.001713	0.012091	-0.698014	+
D3YUP1	Histone-arginine methyltransferase CARM1	Carm1	-0.722201	-0.676412	-0.703463	0.00036	0.008448	-0.700692	+
Q9CVB6	Actin-related protein 2/3 complex subunit 2	Arpc2	-0.731113	-0.653824	-0.722603	0.001211	0.010928	-0.702513	+
O88967	ATP-dependent zinc metalloprotease YME1L1	Yme1l1	-0.810627	-0.860855	-0.441095	0.033554	0.067538	-0.704192	+
Q8BIJ6	Isoleucine--tRNA ligase, mitochondrial	Iars2	-0.672459	-0.709533	-0.733666	0.000636	0.00929	-0.70522	+
Q8C4B4	Protein unc-119 homolog B	Unc119b	-0.758957	-0.635482	-0.723409	0.002691	0.014677	-0.70595	+
E9PX30	Mitogen-activated protein kinase kinase kinase kinase;Mitogen-activated protein kinase kinase kinase kinase 5	Map4k5	-0.660979	-0.759638	-0.719904	0.001609	0.011874	-0.713507	+
P63024	Vesicle-associated membrane protein 3	Vamp3	-0.684796	-0.67802	-0.793099	0.002681	0.014655	-0.718638	+
E9QKZ2	Importin-9	Ipo9	-0.782694	-0.651181	-0.733451	0.002808	0.014796	-0.722442	+
Q9CZX7	Type 2 phosphatidylinositol 4,5-bisphosphate 4-phosphatase	Tmem55a	-0.733516	-0.742818	-0.691538	0.000476	0.0087	-0.722624	+
Q3U9N4	Granulins;Acrogranin;Granulin-1;Granulin-2;Granulin-3;Granulin-4;Granulin-5;Granulin-6;Granulin-7	Grn	-0.521876	-0.807244	-0.850832	0.019564	0.046363	-0.726651	+
Q9DC23	DnaJ homolog subfamily C member 10	Dnajc10	-0.758217	-0.724722	-0.701126	0.000517	0.009068	-0.728021	+
P09528	Ferritin heavy chain;Ferritin heavy chain, N-terminally processed	Fth1	-0.791001	-0.630716	-0.767886	0.004664	0.018816	-0.729868	+
O55057	Retinal rod rhodopsin-sensitive cGMP 3,5-cyclic phosphodiesterase subunit delta	Pde6d	-0.668612	-0.757545	-0.766004	0.001812	0.012295	-0.730721	+
Q8R2Y8	Peptidyl-tRNA hydrolase 2, mitochondrial	Ptrh2	-0.931114	-0.656899	-0.606246	0.018508	0.044837	-0.73142	+
E9PWE8	Dihydropyrimidinase-related protein 3	Dpysl3	-0.722232	-1.00539	-0.467661	0.042211	0.079452	-0.731762	+
Q8BMP6	Golgi resident protein GCP60	Acbd3	-0.841804	-0.58474	-0.793298	0.011167	0.031987	-0.739948	+
Q06138	Calcium-binding protein 39	Cab39	-0.634474	-0.740136	-0.852672	0.007124	0.024185	-0.742427	+
G3X928	SEC23-interacting protein	Sec23ip	-0.712033	-0.732344	-0.792179	0.00104	0.010373	-0.745519	+
E9QN70	Laminin subunit beta-1	Lamb1	-0.711815	-0.861909	-0.693046	0.004964	0.019499	-0.75559	+
E9QLB2	Lysophospholipase-like protein 1	Lyplal1	-0.630785	-0.82405	-0.819724	0.006988	0.023953	-0.758186	+
Q9JJ28	Protein flightless-1 homolog	Flii	-0.830795	-0.724179	-0.723433	0.002198	0.013477	-0.759469	+
Q99JY9	Actin-related protein 3	Actr3	-0.785578	-0.665151	-0.830742	0.004196	0.017869	-0.76049	+
Q9EQ80	NIF3-like protein 1	Nif3l1	-0.956926	-0.586045	-0.745777	0.01925	0.045948	-0.762916	+
O70404	Vesicle-associated membrane protein 8	Vamp8	-0.764766	-0.832182	-0.692698	0.002773	0.014789	-0.763215	+
Q64727	Vinculin	Vcl	-0.754809	-0.745051	-0.793099	0.000368	0.008448	-0.76432	+
P48722	Heat shock 70 kDa protein 4L	Hspa4l	-0.677533	-0.760587	-0.856958	0.004561	0.018621	-0.765026	+
Q64514	Tripeptidyl-peptidase 2	Tpp2	-0.766837	-0.720511	-0.821195	0.001427	0.011333	-0.769514	+
Q3UHU8		Gtf2i	-0.831134	-0.789027	-0.698932	0.002535	0.014307	-0.773031	+
Q9QY81	Nuclear pore membrane glycoprotein 210	Nup210	-0.813835	-0.764982	-0.741449	0.000759	0.009829	-0.773422	+
Q8BHC4	Dephospho-CoA kinase domain-containing protein	Dcakd	-0.79972	-0.811172	-0.715487	0.00151	0.011549	-0.77546	+
E9Q368		Gm17296	-0.836901	-0.82981	-0.668321	0.004965	0.019499	-0.778344	+
Q8R0F6	Integrin-linked kinase-associated serine/threonine phosphatase 2C	Ilkap	-0.772482	-0.763505	-0.804166	0.00025	0.008448	-0.780051	+
P35505	Fumarylacetoacetase	Fah	-0.944127	-0.574054	-0.823709	0.018938	0.045539	-0.78063	+
Q61655	ATP-dependent RNA helicase DDX19A	Ddx19a;Ddx19b	-0.833268	-0.746834	-0.774898	0.00105	0.010375	-0.785	+
Q9D0M5	Dynein light chain 2, cytoplasmic	Dynll2	-0.63906	-0.719652	-1.01516	0.020243	0.047335	-0.791291	+
Q6PFF0		Scaf4	-0.951911	-0.974985	-0.452174	0.043274	0.081093	-0.793023	+
E9Q6H8		Plekha5	-0.777334	-0.7599	-0.865019	0.001646	0.011913	-0.800751	+
F8WGN6	Kinesin-like protein;Kinesin-like protein KIF21A	Kif21a	-0.980352	-0.665979	-0.761664	0.013171	0.035513	-0.802665	+
Q5SQX6	Cytoplasmic FMR1-interacting protein 2	Cyfip2	-0.819701	-0.923815	-0.666474	0.008545	0.027138	-0.80333	+
Q9Z0N2	Eukaryotic translation initiation factor 2 subunit 3, Y-linked	Eif2s3y	-1.083	-0.635182	-0.69537	0.0291	0.061389	-0.804519	+
Q62470	Integrin alpha-3;Integrin alpha-3 heavy chain;Integrin alpha-3 light chain	Itga3	-0.815375	-0.917668	-0.680976	0.007176	0.024286	-0.804673	+
O35604	Niemann-Pick C1 protein	Npc1	-0.760665	-0.804405	-0.86549	0.001405	0.011333	-0.810187	+
Q8VE73	Cullin-7	Cul7	-0.839895	-0.809647	-0.799684	0.000219	0.008448	-0.816409	+
Q9JKY5	Huntingtin-interacting protein 1-related protein	Hip1r	-0.9587	-0.616867	-0.878052	0.015541	0.039876	-0.817873	+
G3X956	FACT complex subunit SPT16	Supt16;Supt16h	-0.909255	-0.592414	-0.954256	0.0188	0.045332	-0.818642	+
P10833	Ras-related protein R-Ras	Rras	-0.713437	-0.66994	-1.07457	0.023635	0.05321	-0.819315	+
Q9QZV9	NTF2-related export protein 1	Nxt1	-0.81581	-0.877768	-0.76686	0.001527	0.011608	-0.820146	+
Q8R1K1	Ubiquitin-associated domain-containing protein 2	Ubac2	-1.05249	-0.914495	-0.493553	0.039533	0.076192	-0.820179	+
Q6PA06	Atlastin-2	Atl2	-1.17798	-0.618706	-0.667705	0.044264	0.082401	-0.821465	+
O55222	Integrin-linked protein kinase	Ilk	-0.946839	-0.63906	-0.888171	0.012837	0.03482	-0.82469	+
Q8BIA4	F-box/WD repeat-containing protein 8	Fbxw8	-0.855823	-1.02477	-0.617109	0.019583	0.046363	-0.832567	+
P62737	Actin, aortic smooth muscle;Actin, gamma-enteric smooth muscle	Acta2;Actg2	-0.624141	-0.843375	-1.03151	0.019389	0.046205	-0.833008	+
Q9CQ39	Mediator of RNA polymerase II transcription subunit 21	Med21	-0.740017	-0.747516	-1.01667	0.011675	0.032904	-0.834734	+
O55137	Acyl-coenzyme A thioesterase 1	Acot1	-1.06068	-0.719556	-0.730112	0.017444	0.043022	-0.836783	+
Q8BY87	Ubiquitin carboxyl-terminal hydrolase 47	Usp47	-0.834965	-0.811613	-0.868685	0.00039	0.008448	-0.838421	+
D3YU12	NmrA-like family domain-containing protein 1	Nmral1	-0.795222	-0.902775	-0.826737	0.001436	0.011333	-0.841578	+
Q8R3W5	tRNA-splicing endonuclease subunit Sen15	Tsen15	-1.04882	-0.710387	-0.77232	0.014862	0.0388	-0.843843	+
Q9ES34	Ubiquitin-protein ligase E3B	Ube3b	-0.684949	-1.2241	-0.6277	0.046951	0.086005	-0.845582	+
Q6ZQ73	Cullin-associated NEDD8-dissociated protein 2	Cand2	-0.896728	-0.813481	-0.832199	0.000884	0.009951	-0.847469	+
Q8VD75	Huntingtin-interacting protein 1	Hip1	-0.921963	-0.868881	-0.761274	0.003073	0.015355	-0.850706	+
P70665	Sialate O-acetylesterase;Sialate O-acetylesterase small subunit;Sialate O-acetylesterase large subunit	Siae	-0.943102	-0.980924	-0.630165	0.016621	0.041744	-0.851397	+
P97807	Fumarate hydratase, mitochondrial	Fh	-0.830321	-0.830944	-0.898468	0.000702	0.009655	-0.853245	+
Q8K2I4	Beta-mannosidase	Manba	-1.03024	-0.805486	-0.726519	0.011158	0.031987	-0.854082	+
P09055	Integrin beta-1	Itgb1	-0.803136	-0.834766	-0.938371	0.002254	0.013657	-0.858758	+
Q9CQH8	Ribonuclease P protein subunit p14	Rpp14	-1.09166	-0.994762	-0.499246	0.042447	0.079756	-0.861889	+
Q9JHW4	Selenocysteine-specific elongation factor	Eefsec	-0.754552	-0.594747	-1.23681	0.046638	0.085627	-0.862035	+
Q60709	Amyloid-like protein 2	Aplp2	-0.656713	-1.21783	-0.723314	0.039325	0.075964	-0.865954	+
Q8BUR4	Dedicator of cytokinesis protein 1	Dock1	-0.879925	-0.868422	-0.853814	7.6e-05	0.008117	-0.867387	+
Q3TCN2	Putative phospholipase B-like 2;Putative phospholipase B-like 2 28 kDa form;Putative phospholipase B-like 2 40 kDa form;Putative phospholipase B-like 2 15 kDa form	Plbd2	-0.862762	-0.868458	-0.875494	1.8e-05	0.007817	-0.868905	+
D3Z4B2	Gamma-soluble NSF attachment protein	Napg	-0.744729	-0.612634	-1.2668	0.048377	0.087811	-0.874722	+
P46656	Adrenodoxin, mitochondrial	Fdx1	-1.16154	-0.71857	-0.745151	0.025829	0.056266	-0.875088	+
Q6P549	Phosphatidylinositol 3,4,5-trisphosphate 5-phosphatase 2	Inppl1	-0.940324	-0.871743	-0.820636	0.001557	0.011742	-0.877568	+
Q8R146	Acylamino-acid-releasing enzyme	Apeh	-1.00325	-0.76781	-0.863868	0.006001	0.021788	-0.878309	+
P62342	Selenoprotein T	Selt	-0.893649	-0.839081	-0.912539	0.000623	0.00929	-0.881756	+
F8VPL2	Phosphatidylinositol 4-phosphate 3-kinase C2 domain-containing subunit alpha	Pik3c2a	-0.932058	-0.752522	-0.965936	0.00557	0.020824	-0.883505	+
E9QL25	Lysine-specific demethylase 2B	Kdm2b	-0.836493	-0.883819	-0.954479	0.001475	0.011426	-0.891597	+
Q91YM2	Rho GTPase-activating protein 35	Arhgap35	-0.876043	-0.878834	-0.927076	0.000343	0.008448	-0.893984	+
Q8R016	Bleomycin hydrolase	Blmh	-0.983848	-0.805081	-0.898817	0.003304	0.015962	-0.895915	+
Q8BKC5	Importin-5	Ipo5	-0.946986	-0.853747	-0.890885	0.000911	0.009951	-0.897206	+
Q9CR39	WD repeat domain phosphoinositide-interacting protein 3	Wdr45b	-0.839419	-0.68369	-1.1827	0.025685	0.056012	-0.901935	+
Q9JKK1	Syntaxin-6	Stx6	-0.85094	-1.03428	-0.825668	0.00525	0.020165	-0.903628	+
P22366	Myeloid differentiation primary response protein MyD88	Myd88	-0.887404	NA	-0.932219	0.015676	0.040011	-0.909812	+
A2AJI0	MAP7 domain-containing protein 1	Map7d1	-0.799654	-0.839289	-1.109	0.011071	0.031888	-0.915982	+
P57716	Nicastrin	Ncstn	-0.918326	-0.866976	-0.970882	0.001064	0.010441	-0.918728	+
Q8CJF7	Protein ELYS	Ahctf1	-0.866123	-1.00749	-0.88517	0.002312	0.013813	-0.919594	+
Q8BGM4		Wbscr27	-1.05735	-0.590317	-1.11521	0.031045	0.064218	-0.920961	+
O88441	Metaxin-2	Mtx2	-1.03421	-1.1878	-0.580739	0.036005	0.070757	-0.934251	+
P49769	Presenilin-1;Presenilin-1 NTF subunit;Presenilin-1 CTF subunit;Presenilin-1 CTF12	Psen1	-1.04023	-0.90556	-0.858702	0.00337	0.016075	-0.934829	+
F8VQC7		Ktn1	-0.944237	-0.973883	-0.891418	0.000663	0.009406	-0.936513	+
P70677	Caspase-3;Caspase-3 subunit p17;Caspase-3 subunit p12	Casp3	-0.768554	-1.23666	-0.807455	0.024646	0.054629	-0.937556	+
Q8VCQ8		Cald1	-0.681954	-1.20361	-0.929891	0.024813	0.054846	-0.938485	+
Q9EP72	ER membrane protein complex subunit 7	Emc7	-0.931804	-0.817937	-1.07136	0.006018	0.021832	-0.940369	+
P21460	Cystatin-C	Cst3	-1.04513	-0.98482	-0.795366	0.006323	0.022381	-0.941771	+
E9QMV2	Costars family protein ABRACL	Abracl	-1.01086	-0.838044	-0.988185	0.003271	0.01589	-0.945696	+
D3YWJ4		Fntb	-1.02597	-0.769588	-1.04656	0.008728	0.027474	-0.947373	+
O08601	Microsomal triglyceride transfer protein large subunit	Mttp	-1.07388	-0.929068	-0.858311	0.004396	0.018295	-0.953754	+
Q3UHK6	Teneurin-4	Tenm4	-0.795023	-1.14323	-0.953784	0.010726	0.031255	-0.964014	+
Q9D6S7	Ribosome-recycling factor, mitochondrial	Mrrf	-0.987466	-1.17378	-0.734454	0.016955	0.042283	-0.965234	+
P55264	Adenosine kinase	Adk	-0.779097	-0.752554	-1.36897	0.040677	0.077564	-0.966873	+
Q8VDK1	Nitrilase homolog 1	Nit1	-1.02272	-1.034	-0.851791	0.003676	0.016807	-0.969504	+
Q9DB10	Essential MCU regulator, mitochondrial	Smdt1	-1.14075	-1.23566	-0.546416	0.045674	0.084433	-0.974274	+
P06797	Cathepsin L1;Cathepsin L1 heavy chain;Cathepsin L1 light chain	Ctsl	-1.04619	-0.922093	-0.970094	0.001358	0.011333	-0.979458	+
O55111	Desmoglein-2	Dsg2	-0.829712	-1.20615	-0.908381	0.013372	0.035903	-0.981414	+
P55258	Ras-related protein Rab-8A	Rab8a	-0.536404	-1.26263	-1.15205	0.048905	0.088514	-0.983694	+
Q8C845	EF-hand domain-containing protein D2	Efhd2	-0.955339	-0.998426	-1.00009	0.000221	0.008448	-0.984617	+
Q9WV85	Nucleoside diphosphate kinase 3	Nme3	-1.06362	-0.9696	-0.925847	0.001694	0.012053	-0.986357	+
P08752	Guanine nucleotide-binding protein G(i) subunit alpha-2	Gnai2	-1.08975	-1.01298	-0.861126	0.004591	0.018687	-0.987953	+
E9PZB3		Gm5093	-0.850014	-1.10548	-1.01894	0.005676	0.021021	-0.991478	+
F8VQC9	Anion exchange protein;Sodium bicarbonate cotransporter 3	Slc4a7	-0.935293	-0.72469	-1.32293	0.029673	0.062079	-0.994306	+
G5E8N5	L-lactate dehydrogenase;L-lactate dehydrogenase A chain	Ldha	-1.08506	-0.894163	-1.02907	0.003177	0.015682	-1.00277	+
Q61142	Spindlin-1	Spin1	-0.708981	-1.08467	-1.21747	0.02225	0.050875	-1.00371	+
Q9ER67		Maged2	-1.17717	-0.981191	-0.854775	0.008607	0.027265	-1.00438	+
Q3TW27	Negative elongation factor D	Nelfcd	-0.936422	-1.22496	-0.885621	0.010651	0.031102	-1.01567	+
Q9DBC7	cAMP-dependent protein kinase type I-alpha regulatory subunit;cAMP-dependent protein kinase type I-alpha regulatory subunit, N-terminally processed	Prkar1a	-1.18749	-0.9572	-0.945268	0.005806	0.021398	-1.02999	+
E9PUJ6	E3 ubiquitin-protein ligase MYCBP2	Mycbp2	-0.883888	-1.04461	-1.18286	0.006867	0.023654	-1.03712	+
Q9WTK5	Nuclear factor NF-kappa-B p100 subunit;Nuclear factor NF-kappa-B p52 subunit	Nfkb2	-1.0614	-1.13893	-0.915218	0.003965	0.017443	-1.03851	+
Q91WK5	Glycine cleavage system H protein, mitochondrial	Gcsh	-1.08151	-1.02402	-1.01545	0.000397	0.008448	-1.04033	+
E9PXX7	Thioredoxin domain-containing protein 5	Txndc5	-1.04957	-0.994338	-1.07872	0.000565	0.009164	-1.04088	+
Q9D091	GTPase NRas	Nras	-1.00115	-1.10025	-1.02232	0.000836	0.009951	-1.04124	+
Q9D892	Inosine triphosphate pyrophosphatase	Itpa	-0.948601	-1.48015	-0.703463	0.044979	0.083447	-1.04407	+
Q8BJ03	Cytochrome c oxidase assembly protein COX15 homolog	Cox15	-0.907504	-1.46727	-0.764393	0.03953	0.076192	-1.04639	+
Q921I0	ORM1-like protein 1	Ormdl1;Gm28778	-1.109	-0.975023	-1.05626	0.001383	0.011333	-1.04676	+
Q61090	Frizzled-7	Fzd7	NA	-0.99353	-1.11049	0.035353	0.069996	-1.05201	+
B1AR46	Claudin;Claudin-7	Cldn7	-1.19165	-0.999932	-0.96487	0.004457	0.018407	-1.05215	+
P10639	Thioredoxin	Txn	-1.3759	-0.588688	-1.20596	0.047586	0.086906	-1.05685	+
Q8C7V8	Coiled-coil domain-containing protein 134	Ccdc134	-0.851421	-1.10361	-1.22293	0.010518	0.03082	-1.05932	+
Q80X90	Filamin-B	Flnb	-1.1049	-1.06999	-1.00558	0.000752	0.009829	-1.06016	+
Q8BMS4	Ubiquinone biosynthesis O-methyltransferase, mitochondrial	Coq3	-0.90904	-1.40186	-0.902973	0.022989	0.052032	-1.07129	+
Q80YE7	Death-associated protein kinase 1	Dapk1	-1.25152	-1.05236	-0.918092	0.008035	0.02623	-1.07399	+
Q99PG2	Opioid growth factor receptor	Ogfr	-1.08111	-1.13689	-1.00835	0.001195	0.010875	-1.07545	+
Q923W1	Trimethylguanosine synthase	Tgs1;Gm5117	-0.896374	-1.40145	-0.931671	0.022114	0.050592	-1.0765	+
Q91WS0	CDGSH iron-sulfur domain-containing protein 1	Cisd1	-1.09056	-1.08984	-1.0562	0.00011	0.008117	-1.07887	+
S4R291	Ankyrin-2	Ank2	-1.04693	-1.11965	-1.07203	0.00039	0.008448	-1.07954	+
Q9CWN7	CCR4-NOT transcription complex subunit 11	Cnot11	-1.12108	-0.89201	-1.23252	0.008474	0.027115	-1.08187	+
Q04690	Neurofibromin	Nf1	-0.992493	-1.14025	-1.11341	0.001759	0.012172	-1.08205	+
P06801	NADP-dependent malic enzyme;Malic enzyme	Me1	-0.97432	-1.14678	-1.12752	0.002529	0.014307	-1.08288	+
P13011	Acyl-CoA desaturase 2;Acyl-CoA desaturase 1	Scd2;Scd3;Scd1	-1.31687	-0.8772	-1.06844	0.013422	0.035971	-1.0875	+
Q8BVA2	Transmembrane protein 222	Tmem222	-0.965522	-1.09702	-1.21131	0.004207	0.017869	-1.09128	+
P58021	Transmembrane 9 superfamily member 2	Tm9sf2	-1.01967	-1.14781	-1.11158	0.001215	0.010932	-1.09302	+
F6TLV3	Fibronectin type-III domain-containing protein 3A	Fndc3a	-1.52615	-0.693409	-1.06282	0.045215	0.083694	-1.09412	+
F8WIX8	Histone H2A;Histone H2A type 2-C;Histone H2A type 2-A	Hist1h2al;Hist2h2ac;Hist2h2aa1;Hist1h2aa	-0.954564	-0.773184	-1.55952	0.043984	0.08207	-1.09576	+
E9Q4P1		Wdfy1	-1.11397	-1.12171	-1.05546	0.000363	0.008448	-1.09705	+
Q6GV12	3-ketodihydrosphingosine reductase	Kdsr	-1.15136	-0.915843	-1.23194	0.007354	0.024652	-1.09972	+
Q3UQ84	Threonine--tRNA ligase, mitochondrial	Tars2	-1.14756	-1.06646	NA	0.023309	0.052561	-1.10701	+
Q61206	Platelet-activating factor acetylhydrolase IB subunit beta	Pafah1b2	-1.16299	-1.1212	-1.03727	0.001113	0.010644	-1.10716	+
Q8R404	Protein QIL1	Qil1	-1.13205	-1.07564	-1.11615	0.00023	0.008448	-1.10794	+
D3Z7C0	39S ribosomal protein L40, mitochondrial	Mrpl40	-1.10785	-1.1236	NA	0.004494	0.01845	-1.11573	+
Q6ZWY9	Histone H2B type 1-C/E/G;Histone H2B type 1-H;Histone H2B type 2-B;Histone H2B type 1-M	Hist1h2bc;Hist1h2bh;Hist2h2bb;Hist1h2bm	-1.24253	-0.820939	-1.2987	0.017621	0.043356	-1.12072	+
Q00915	Retinol-binding protein 1	Rbp1	-1.23324	-0.954201	-1.19284	0.005918	0.021559	-1.12676	+
G3UXZ5	Proteasome activator complex subunit 1	Psme1	-1.11583	-1.07776	-1.18737	0.000812	0.009951	-1.12698	+
Q9CWG8	NADH dehydrogenase [ubiquinone] complex I, assembly factor 7	Ndufaf7	-1.50617	-1.11061	-0.773473	0.033358	0.067304	-1.13008	+
P97821	Dipeptidyl peptidase 1;Dipeptidyl peptidase 1 exclusion domain chain;Dipeptidyl peptidase 1 heavy chain;Dipeptidyl peptidase 1 light chain	Ctsc	-1.23848	-1.20036	-0.973671	0.005238	0.020159	-1.13751	+
Q91YW3	DnaJ homolog subfamily C member 3	Dnajc3	-0.973011	-1.24589	-1.20242	0.005464	0.020535	-1.14044	+
O89017	Legumain	Lgmn	-1.48401	-0.813888	-1.12787	0.027554	0.058987	-1.14192	+
P70302	Stromal interaction molecule 1	Stim1	-0.812932	-0.954688	-1.66151	0.048883	0.088514	-1.14304	+
Q80WG5	Volume-regulated anion channel subunit LRRC8A	Lrrc8a	-1.08639	-1.12888	-1.21547	0.001101	0.010624	-1.14358	+
Q9Z1Q5	Chloride intracellular channel protein 1	Clic1	-1.16333	-1.1061	-1.17941	0.000374	0.008448	-1.14961	+
Q8VDV8	MIT domain-containing protein 1	Mitd1	-1.21135	-1.31226	-0.928961	0.009789	0.029415	-1.15086	+
Q9CQA6	Coiled-coil-helix-coiled-coil-helix domain-containing protein 1	Chchd1	-1.5602	-0.98842	-0.907896	0.030323	0.063135	-1.15217	+
Q7TMI3	E3 ubiquitin-protein ligase UHRF2	Uhrf2	-1.07148	-1.32054	-1.08084	0.00492	0.019448	-1.15762	+
P84096	Rho-related GTP-binding protein RhoG	Rhog	-1.26175	-1.10831	-1.1232	0.001756	0.012172	-1.16442	+
P54116	Erythrocyte band 7 integral membrane protein	Stom	-1.03265	-1.48171	-0.997819	0.017257	0.042859	-1.17073	+
P97823	Acyl-protein thioesterase 1	Lypla1	-1.2388	-0.960394	-1.32344	0.00861	0.027265	-1.17421	+
Q99LP6	GrpE protein homolog 1, mitochondrial	Grpel1	-1.19749	-1.16652	-1.15973	9.8e-05	0.008117	-1.17458	+
Q8R5J9	PRA1 family protein 3	Arl6ip5	-0.884696	-1.52256	-1.12029	0.024175	0.053944	-1.17585	+
Q8K3Y3	Protein lin-28 homolog A	Lin28a	-1.04937	-1.21406	-1.2737	0.003221	0.015794	-1.17904	+
Q8BHZ0	Protein FAM49A	Fam49a	-1.19174	-1.12993	-1.23877	0.000704	0.009655	-1.18682	+
F7CVJ5		Ahnak2	-0.953974	-1.3657	-1.25263	0.010471	0.030723	-1.19077	+
A0A0A0MQA5	Tubulin alpha-4A chain	Tuba4a	-1.23983	-1.38168	-0.953366	0.010991	0.031784	-1.19162	+
Q04750	DNA topoisomerase 1	Top1	-1.22989	-1.0321	-1.32552	0.005179	0.020023	-1.19584	+
Q9QZM0	Ubiquilin-2	Ubqln2	-1.27114	-1.09009	-1.22655	0.002067	0.013045	-1.19593	+
Q9D020	Cytosolic 5-nucleotidase 3A	Nt5c3a	-1.61423	-1.08393	-0.917468	0.029066	0.061361	-1.20521	+
E9QNX9	Tyrosine-protein kinase receptor;Insulin-like growth factor 1 receptor;Insulin-like growth factor 1 receptor alpha chain;Insulin-like growth factor 1 receptor beta chain	Igf1r	-1.08919	-1.28638	-1.27665	0.002767	0.014789	-1.21741	+
P19324	Serpin H1	Serpinh1	-1.26637	-1.27998	-1.10641	0.002088	0.013128	-1.21758	+
Q8CGP6	Histone H2A type 1-H;Histone H2A type 1-K;Histone H2A type 1-F;Histone H2A type 3;Histone H2A type 1;Histone H2A.J	Hist1h2ah;Hist1h2ak;Hist1h2af;Hist3h2a;Hist1h2ab;H2afj	-1.319	-0.872982	-1.46098	0.020515	0.04776	-1.21766	+
P43406	Integrin alpha-V;Integrin alpha-V heavy chain;Integrin alpha-V light chain	Itgav	-0.996284	-1.4214	-1.23857	0.010052	0.029971	-1.21875	+
O35623	BET1 homolog	Bet1	-1.1234	-1.10079	-1.43866	0.007883	0.025821	-1.22095	+
Q8R0F8	Acylpyruvase FAHD1, mitochondrial	Fahd1	-1.50671	-1.48799	-0.671177	0.047239	0.086459	-1.22196	+
P84228	Histone H3.2	Hist1h3b	-1.33317	-0.973618	-1.36286	0.010297	0.030382	-1.22322	+
G3X8Q0	Transcription factor Sp1	Sp1	-1.22646	-1.22487	NA	0.000413	0.008448	-1.22566	+
Q8BGB8	Ubiquinone biosynthesis protein COQ4 homolog, mitochondrial	Coq4	-0.781319	-1.36401	-1.53701	0.032975	0.067063	-1.22744	+
Q80ZM5		H1fx	-1.02206	-1.34512	-1.32283	0.007096	0.024131	-1.23	+
G5E814	NADH dehydrogenase [ubiquinone] 1 alpha subcomplex subunit 11	Ndufa11	-1.22077	-1.28219	-1.19734	0.00042	0.008448	-1.23343	+
Q8VI86	COMM domain-containing protein 1	Commd1;Gm28048	-1.00035	-1.32595	-1.38692	0.009268	0.028414	-1.23774	+
P68033	Actin, alpha cardiac muscle 1	Actc1	-0.976639	-1.2357	-1.50103	0.01463	0.038382	-1.23779	+
O08969	Pleckstrin homology-like domain family A member 2	Phlda2	-1.64658	-0.842786	-1.22733	0.033354	0.067304	-1.2389	+
Q9CQC8	Maspardin	Spg21	-1.32772	-1.10228	-1.29486	0.003191	0.015709	-1.24162	+
P17809	Solute carrier family 2, facilitated glucose transporter member 1	Slc2a1	-1.08345	-1.25458	-1.38922	0.005033	0.019673	-1.24242	+
Q8C3V4	Signal transducer and activator of transcription;Signal transducer and activator of transcription 1	Stat1	-1.3534	-1.11944	-1.25936	0.002972	0.015148	-1.24407	+
Q8CI75	DIS3-like exonuclease 2	Dis3l2	-1.24316	-1.21523	-1.27397	0.000186	0.008377	-1.24412	+
Q8R570	Synaptosomal-associated protein 47	Snap47	-1.40061	-1.00187	-1.33017	0.009612	0.02913	-1.24422	+
Q91ZA3	Propionyl-CoA carboxylase alpha chain, mitochondrial	Pcca	-1.09032	-1.24511	-1.40427	0.005245	0.020164	-1.24657	+
D3YZ09	H/ACA ribonucleoprotein complex subunit 1	Gar1	-0.914447	-1.69977	-1.12928	0.033501	0.067464	-1.24783	+
P62806	Histone H4	Hist1h4a	-1.26408	-0.953116	-1.52973	0.017337	0.042947	-1.24898	+
Q8VEE0	Ribulose-phosphate 3-epimerase	Rpe	-1.32552	-1.20535	-1.22236	0.000899	0.009951	-1.25107	+
A2RSY6	TRMT1-like protein	Trmt1l	-1.24343	-1.24676	-1.2865	0.000121	0.008296	-1.2589	+
Q3TJD7	PDZ and LIM domain protein 7	Pdlim7	-1.49186	-1.53673	-0.75605	0.037968	0.073624	-1.26155	+
P56677	Suppressor of tumorigenicity 14 protein homolog	St14	-1.11282	-1.51144	-1.16549	0.009653	0.029194	-1.26325	+
P70280	Vesicle-associated membrane protein 7	Vamp7	-1.62429	-0.708333	-1.47689	0.046542	0.085552	-1.26984	+
P97929	Breast cancer type 2 susceptibility protein homolog	Brca2	-1.29335	-0.924218	-1.5984	0.022685	0.051588	-1.27199	+
D3YYU8	Obscurin-like protein 1	Obsl1	-1.3036	-1.27301	-1.25428	0.000127	0.008377	-1.27696	+
Q3UH59	Myosin-10	Myh10	-1.32657	-1.27361	-1.23258	0.000453	0.0087	-1.27759	+
Q9D7P6	Iron-sulfur cluster assembly enzyme ISCU, mitochondrial	Iscu	-0.930099	-1.18472	-1.8055	0.037373	0.07277	-1.30677	+
Q9CZH3	Proteasome assembly chaperone 3	Psmg3;Gm26938	-1.18653	-1.41752	-1.31899	0.002609	0.014443	-1.30768	+
Q8CFE2	UPF0609 protein C4orf27 homolog		-1.58974	-1.51353	-0.832173	0.032089	0.065714	-1.31181	+
P48771	Cytochrome c oxidase subunit 7A2, mitochondrial	Cox7a2	-1.82125	-1.12053	-0.999856	0.035948	0.070743	-1.31388	+
E9PWM3		Armcx4	-1.33821	-1.43744	-1.19018	0.00294	0.015067	-1.32194	+
Q922R5	Serine/threonine-protein phosphatase 4 regulatory subunit 3B	Smek2	-0.733832	-1.54901	-1.69577	0.047315	0.08656	-1.3262	+
Q8C407	Protein YIPF4	Yipf4	-1.65915	-1.13082	-1.19576	0.015317	0.039548	-1.32858	+
Q921N7	Transmembrane protein 70, mitochondrial	Tmem70	-1.42799	-1.30164	-1.27446	0.001254	0.011021	-1.3347	+
P21995	Embigin	Emb	-1.39154	-1.32116	-1.2931	0.00048	0.0087	-1.33527	+
B1AX58	Plastin-3	Pls3	-1.32676	-1.24539	-1.46697	0.002302	0.013813	-1.34637	+
Q8VI63	MOB kinase activator 2	Mob2	-1.86155	-0.849979	-1.3424	0.043672	0.081659	-1.35131	+
P61028	Ras-related protein Rab-8B	Rab8b	-1.61726	-1.23807	-1.20299	0.009476	0.028844	-1.35277	+
Q9CQ21	Malignant T-cell-amplified sequence 2	Mcts2	-1.34236	-1.43654	-1.28587	0.00105	0.010375	-1.35492	+
A2ARV4	Low-density lipoprotein receptor-related protein 2	Lrp2	-1.20932	-1.39224	-1.47613	0.003341	0.016015	-1.35923	+
Q8BFZ9	Erlin-2	Erlin2	-1.69074	-1.49664	-0.895366	0.029584	0.062079	-1.36092	+
A3KGI3	Protein CASC5	Casc5	-1.21864	-1.32049	-1.54822	0.005075	0.019737	-1.36245	+
P09671	Superoxide dismutase [Mn], mitochondrial	Sod2	-1.0795	-1.51657	-1.4945	0.010695	0.031209	-1.36353	+
Q8BFR4	N-acetylglucosamine-6-sulfatase	Gns	-1.44204	-1.26816	-1.38152	0.001393	0.011333	-1.36391	+
Q9D1G1	Ras-related protein Rab-1B	Rab1b	-1.7024	-1.12171	-1.27488	0.01579	0.040158	-1.36633	+
A0A087WNV1	Arf-GAP domain and FG repeat-containing protein 1	Agfg1	-1.45159	-0.931499	-1.71917	0.027427	0.058814	-1.36742	+
P40240	CD9 antigen	Cd9	-1.28123	-1.38253	-1.45451	0.001338	0.011333	-1.37276	+
A3KGV1	Outer dense fiber protein 2	Odf2	-1.15111	-1.25698	-1.73735	0.016616	0.041744	-1.38181	+
O54782	Epididymis-specific alpha-mannosidase	Man2b2	-1.3985	-1.37094	NA	0.006335	0.022406	-1.38472	+
E9Q8I7		Nfxl1	-1.8261	-1.52573	-0.802562	0.044899	0.083364	-1.3848	+
F8VQC1	Signal recognition particle subunit SRP72	Srp72	-1.44365	-1.91176	-0.802687	0.049805	0.089759	-1.38603	+
Q99LI5	Zinc finger protein 281	Znf281	-1.40963	-1.27216	-1.53493	0.002902	0.014958	-1.40557	+
Q80XQ2	TBC1 domain family member 5	Tbc1d5	-1.17295	-1.70897	-1.33901	0.012442	0.03421	-1.40698	+
Q8JZX4	Splicing factor 45	Rbm17	-1.48189	-1.33514	-1.40442	0.000906	0.009951	-1.40715	+
Q9DAA6	Exosome complex component CSL4	Exosc1	-1.59381	-1.73055	-0.903833	0.031408	0.064745	-1.4094	+
P60710	Actin, cytoplasmic 1;Actin, cytoplasmic 1, N-terminally processed	Actb	-1.32991	-1.42021	-1.48241	0.000983	0.010212	-1.41085	+
D3Z687	Chromatin complexes subunit BAP18	0610010K14Rik;Bap18	-1.38477	-1.38193	-1.46983	0.000417	0.008448	-1.41217	+
P12265	Beta-glucuronidase	Gusb	-1.44748	-1.40253	-1.41357	9.1e-05	0.008117	-1.42119	+
P22935	Cellular retinoic acid-binding protein 2	Crabp2	-1.13117	-1.53259	-1.61142	0.010713	0.031239	-1.42506	+
H3BKF4	Synaptogyrin-2	Gm20708;Syngr2	-1.8728	-0.836421	-1.57377	0.043517	0.081477	-1.42766	+
Q9CQZ5	NADH dehydrogenase [ubiquinone] 1 alpha subcomplex subunit 6	Ndufa6	-1.28619	-1.19934	-1.81007	0.017289	0.042864	-1.43187	+
Q9CQV6	Microtubule-associated proteins 1A/1B light chain 3B	Map1lc3b	-1.46067	-1.41088	NA	0.011039	0.031838	-1.43578	+
Q9QUJ7	Long-chain-fatty-acid--CoA ligase 4	Acsl4	-1.55941	-1.43785	-1.34192	0.001888	0.012438	-1.4464	+
Q9CRB9	MICOS complex subunit Mic19	Chchd3	-1.29284	-1.41206	-1.63446	0.004756	0.018986	-1.44645	+
Q64449	C-type mannose receptor 2	Mrc2	-1.38184	-1.63644	-1.34685	0.003911	0.01733	-1.45504	+
A0A087WQH8		Slc35a4	-1.43972	-1.4037	-1.5234	0.000593	0.009164	-1.45561	+
Q9ES97	Reticulon-3	Rtn3	-1.36925	-1.31159	-1.69665	0.006685	0.023293	-1.45916	+
P40630	Transcription factor A, mitochondrial	Tfam	-1.67474	-0.917923	-1.78724	0.033223	0.067215	-1.45997	+
Q91XA2	Golgi membrane protein 1	Golm1	-1.75725	-1.29143	-1.35652	0.009695	0.029215	-1.4684	+
Q8R164	Valacyclovir hydrolase	Bphl	-1.27721	-1.56037	-1.57305	0.004287	0.018126	-1.47021	+
E9Q309		Cep350	-0.929011	-1.41021	-2.0723	0.047224	0.086459	-1.47051	+
O88792	Junctional adhesion molecule A	F11r	-1.50104	-1.18025	-1.75585	0.012441	0.03421	-1.47905	+
Q91V04	Translocating chain-associated membrane protein 1	Tram1	-1.47854	-1.49931	-1.46225	5.3e-05	0.007925	-1.48003	+
P29758	Ornithine aminotransferase, mitochondrial	Oat	-1.49079	-1.48685	-1.47421	1.1e-05	0.007495	-1.48395	+
P47955	60S acidic ribosomal protein P1	Rplp1;Gm10073	-1.57958	-1.37124	-1.50421	0.001678	0.012008	-1.48501	+
O08848	60 kDa SS-A/Ro ribonucleoprotein	Trove2	-1.27509	-1.86363	-1.32981	0.015515	0.039863	-1.48951	+
Q9D937	Uncharacterized protein C11orf98 homolog	Ints5	-1.40362	-1.66576	-1.40556	0.003389	0.016089	-1.49165	+
Q8VCT3	Aminopeptidase B	Rnpep	-1.31284	-1.22912	-1.93834	0.021721	0.049935	-1.49343	+
P51807	Dynein light chain Tctex-type 1	Dynlt1	-1.51066	-1.48848	-1.49091	2.2e-05	0.007817	-1.49668	+
Q7JCY6	NADH-ubiquinone oxidoreductase chain 4	mt-Nd4;Mtnd4	-1.42656	-1.38662	-1.677	0.003666	0.016807	-1.49673	+
D3YX85	Arf-GAP with SH3 domain, ANK repeat and PH domain-containing protein 2	Asap2	-1.92236	-0.896212	-1.68709	0.040149	0.076992	-1.50189	+
Q0KL02	Triple functional domain protein	Trio	-1.46618	-1.66896	-1.37988	0.003225	0.015794	-1.50501	+
P56382	ATP synthase subunit epsilon, mitochondrial	Atp5e	-1.45754	NA	-1.55918	0.021443	0.049512	-1.50836	+
Q8BJZ4	28S ribosomal protein S35, mitochondrial	Mrps35	-1.61452	-1.77729	-1.14035	0.015619	0.039988	-1.51072	+
Q03958	Prefoldin subunit 6	Pfdn6	-1.86557	-1.77272	-0.896783	0.039242	0.075853	-1.51169	+
Q7JCX7	Cytochrome c oxidase subunit 3	mt-Co3	-1.37284	-1.8675	-1.32563	0.012717	0.034651	-1.52199	+
Q8VE10	N-alpha-acetyltransferase 40	Naa40	-1.40942	-1.14349	-2.01336	0.027417	0.058814	-1.52209	+
Q9Z262	Claudin-6	Cldn6	-1.6826	-1.46668	-1.41921	0.002821	0.014813	-1.52283	+
Q9D3B1	Very-long-chain (3R)-3-hydroxyacyl-CoA dehydratase 2	Hacd2	-1.88477	-1.6766	-1.00841	0.02882	0.060999	-1.52326	+
Q80UM7	Mannosyl-oligosaccharide glucosidase	Mogs	-1.6072	-1.59498	-1.37031	0.002543	0.014307	-1.52416	+
O35639	Annexin A3	Anxa3	-1.49583	-1.64857	-1.43714	0.001698	0.012053	-1.52718	+
F6UR10		Spcs1	-1.5439	-1.39844	-1.64179	0.002134	0.013255	-1.52805	+
Q8BKE6	Cytochrome P450 20A1	Cyp20a1	-1.03561	-1.35617	-2.19326	0.047389	0.086631	-1.52835	+
O35242	Protein FAN	Nsmaf	-2.12726	-1.39325	-1.06696	0.039562	0.076192	-1.52916	+
Q9DAM7	Transmembrane protein 263	Tmem263	-1.23669	-1.11999	-2.23262	0.04935	0.089166	-1.52976	+
Q9CXV1	Succinate dehydrogenase [ubiquinone] cytochrome b small subunit, mitochondrial	Sdhd	-1.56425	-1.49931	-1.52617	0.000152	0.008377	-1.52991	+
F8WIV2	Serpin B6	Serpinb6a;Serpinb6	-1.36385	-1.30512	-1.94873	0.017353	0.042947	-1.53923	+
Q99N96	39S ribosomal protein L1, mitochondrial	Mrpl1	-1.38323	-1.85759	-1.39163	0.010147	0.030111	-1.54415	+
Q9QZD8	Mitochondrial dicarboxylate carrier	Slc25a10	-1.22557	-2.2514	-1.16249	0.048336	0.087811	-1.54649	+
Q9CQ71	Replication protein A 14 kDa subunit	Rpa3	-1.43457	-1.88275	-1.34747	0.011183	0.031987	-1.55493	+
Q8BP43		Tpm1	-1.38481	-1.51641	-1.76398	0.00507	0.019737	-1.55507	+
Q9D1B9	39S ribosomal protein L28, mitochondrial	Mrpl28	-1.21386	-1.68316	-1.7697	0.012098	0.033735	-1.55557	+
P61750	ADP-ribosylation factor 4	Arf4	-1.48056	-1.50896	-1.68834	0.001736	0.012125	-1.55929	+
Q920Q6	RNA-binding protein Musashi homolog 2	Msi2	-1.25947	-1.69375	-1.75101	0.009653	0.029194	-1.56808	+
Q9CXE7	Transmembrane emp24 domain-containing protein 5	Tmed5	-1.13731	-1.66178	-1.91899	0.020726	0.048093	-1.57269	+
Q8BHE8	Uncharacterized protein C2orf47 homolog, mitochondrial		NA	-1.5015	-1.64934	0.029849	0.062332	-1.57542	+
Q8BGT7	Survival of motor neuron-related-splicing factor 30	Smndc1	-1.16031	-1.68478	-1.90193	0.018809	0.045332	-1.58234	+
Q9D162	Coiled-coil domain-containing protein 167	Ccdc167	-1.81869	-1.90937	-1.02989	0.029636	0.062079	-1.58598	+
Q9JIH2	Nuclear pore complex protein Nup50	Nup50	-1.94343	-1.35854	-1.46071	0.012663	0.034569	-1.58756	+
Q9CWQ0	Diphthine synthase	Dph5	-1.84491	-1.23497	-1.71205	0.013176	0.035513	-1.59731	+
G3X9V0	Proteasome activator complex subunit 2	Psme2	-1.61814	-1.5459	-1.63001	0.00027	0.008448	-1.59802	+
P99027	60S acidic ribosomal protein P2	Rplp2	-1.51555	-1.67487	-1.61889	0.000846	0.009951	-1.6031	+
O89051	Integral membrane protein 2B;BRI2, membrane form;BRI2 intracellular domain;BRI2C, soluble form;Bri23 peptide	Itm2b	-1.7272	-1.32194	-1.76544	0.007726	0.025438	-1.60486	+
Q9CXL3	Uncharacterized protein C7orf50 homolog		-1.80486	-1.01818	-1.99917	0.033093	0.067088	-1.6074	+
Q60715	Prolyl 4-hydroxylase subunit alpha-1	P4ha1	-1.5743	-1.64942	NA	0.014833	0.03877	-1.61186	+
Q8BYK6	YTH domain-containing family protein 3	Ythdf3	-1.26093	-2.05389	-1.52944	0.020167	0.047188	-1.61475	+
Q9R0Q6	Actin-related protein 2/3 complex subunit 1A	Arpc1a	-1.28035	-2.21927	-1.34754	0.03329	0.06723	-1.61572	+
Q8BGS1	Band 4.1-like protein 5	Epb41l5	-1.73333	-1.65525	-1.46083	0.002503	0.014253	-1.61647	+
Q08093	Calponin-2;Calponin	Cnn2	-1.69456	-1.68273	-1.47341	0.001967	0.012707	-1.6169	+
Q8K2Y7	39S ribosomal protein L47, mitochondrial	Mrpl47	-2.20401	-1.14319	-1.53509	0.034357	0.068633	-1.62743	+
Q6PDI5	Proteasome-associated protein ECM29 homolog	Ecm29;AI314180	-1.52894	-1.76416	-1.59514	0.001842	0.01235	-1.62941	+
Q9D104	Signal recognition particle 19 kDa protein	Srp19	-1.71747	-1.43101	-1.74816	0.003807	0.017031	-1.63221	+
Q3TJ22		Aamp	-1.8046	-1.86687	-1.25154	0.013906	0.036918	-1.641	+
Q9WU28	Prefoldin subunit 5	Pfdn5	-1.672	-1.60983	-1.66926	0.000151	0.008377	-1.65036	+
P20152	Vimentin	Vim	-1.47669	-1.59784	-1.89064	0.005467	0.020535	-1.65506	+
Q62165	Dystroglycan;Alpha-dystroglycan;Beta-dystroglycan	Dag1	-1.56627	-1.67283	-1.72885	0.000828	0.009951	-1.65599	+
F2Z4A3		Fat1	-1.43915	-1.68801	-1.84509	0.005046	0.019704	-1.65742	+
O89001	Carboxypeptidase D	Cpd	-1.74578	-1.7828	-1.50559	0.002671	0.014644	-1.67806	+
Q8BKG3	Inactive tyrosine-protein kinase 7	Ptk7	-1.65656	-1.70644	-1.67269	7.7e-05	0.008117	-1.67856	+
Q9CQN7	39S ribosomal protein L41, mitochondrial	Mrpl41;Gm6434	-2.16499	-1.27011	-1.62473	0.022979	0.052032	-1.68661	+
Q8R1V4	Transmembrane emp24 domain-containing protein 4	Tmed4	-1.46918	-1.83335	-1.7633	0.004337	0.018253	-1.68861	+
A2AF47	Dedicator of cytokinesis protein 11	Dock11	-1.7606	-1.60953	-1.69875	0.000673	0.009447	-1.68963	+
Q9D0J4	ADP-ribosylation factor-like protein 2	Arl2	-1.8962	-1.8348	-1.35395	0.010075	0.029994	-1.69498	+
Q9Z2Y8	Proline synthase co-transcribed bacterial homolog protein	Prosc	-1.8714	-1.65708	-1.60092	0.002315	0.013813	-1.7098	+
Q9WV03	Protein FAM50A	Fam50a	-1.14058	-2.03689	-1.96832	0.027057	0.058312	-1.71526	+
Q8R5C5	Beta-centractin	Actr1b	-1.70184	-1.42477	-2.03215	0.010263	0.030364	-1.71959	+
Q61686	Chromobox protein homolog 5	Cbx5	-1.77701	-1.79167	-1.59631	0.001329	0.011333	-1.72166	+
Q923D4	Splicing factor 3B subunit 5	Sf3b5	-1.61417	-1.71371	-1.86186	0.001726	0.012106	-1.72991	+
Q61474	RNA-binding protein Musashi homolog 1	Msi1	-1.20924	-1.67376	-2.31977	0.032789	0.066856	-1.73426	+
Q9CR11	YEATS domain-containing protein 4	Yeats4	-1.9001	-1.59259	-1.72514	0.002611	0.014443	-1.73928	+
E9QJS0	28S ribosomal protein S10, mitochondrial	Mrps10	-1.28907	-2.01501	-1.95406	0.017144	0.042653	-1.75271	+
P83917	Chromobox protein homolog 1	Cbx1	-1.81608	-1.74402	-1.71219	0.000306	0.008448	-1.75743	+
A2CG63	AT-rich interactive domain-containing protein 4B	Arid4b	NA	-1.88875	-1.65734	0.041486	0.078493	-1.77304	+
Q8BVA5	UPF0554 protein C2orf43 homolog		-2.01955	-2.00117	-1.3172	0.016456	0.041429	-1.77931	+
Q78HU3	Multivesicular body subunit 12A	Mvb12a	-1.6115	-2.12714	-1.61462	0.009097	0.028179	-1.78442	+
P31938	Dual specificity mitogen-activated protein kinase kinase 1	Map2k1	-1.85073	-1.90068	-1.60931	0.002525	0.014303	-1.78691	+
Q9CZG3	COMM domain-containing protein 8	Commd8	-1.86779	-1.76955	-1.7289	0.000531	0.009068	-1.78875	+
P61514	60S ribosomal protein L37a	Rpl37a	-1.74846	-1.84428	-1.78808	0.00024	0.008448	-1.79361	+
Q9MD68	Cytochrome c oxidase subunit 1	mt-Co1;Mtco1	-1.8991	-1.61598	-1.86609	0.002474	0.014202	-1.79372	+
Q9JJV2	Profilin-2;Profilin	Pfn2	-1.29349	-2.44452	-1.65024	0.034051	0.068215	-1.79609	+
Q8CG03	cGMP-specific 3,5-cyclic phosphodiesterase	Pde5a	-1.39624	-1.75181	-2.24502	0.018229	0.044492	-1.79769	+
P52483	Ubiquitin-conjugating enzyme E2 E3	Ube2e3	-1.35984	-2.07874	-1.96905	0.015042	0.039124	-1.80254	+
Q78JW9	Ubiquitin domain-containing protein UBFD1	Ubfd1	-1.57316	-1.91169	-1.94928	0.004331	0.018253	-1.81138	+
Q8K2Q7	BRO1 domain-containing protein BROX	Brox	-1.0112	-2.12209	-2.32495	0.046856	0.085906	-1.81941	+
Q9R1T4	Septin-6	Sept6	-2.14668	-1.29546	-2.02244	0.020586	0.047867	-1.82152	+
Q9CQA9	Cancer-related nucleoside-triphosphatase homolog	Ntpcr	NA	-1.69989	-1.95785	0.044822	0.083285	-1.82887	+
Q3KR45		Dnmt3b	-1.51093	-1.87621	-2.12953	0.009399	0.028692	-1.83889	+
P60904	DnaJ homolog subfamily C member 5	Dnajc5	-1.52988	-1.38536	-2.61436	0.041534	0.078493	-1.8432	+
Q9WUM5	Succinyl-CoA ligase [ADP/GDP-forming] subunit alpha, mitochondrial	Suclg1	-2.11839	-1.86434	-1.58145	0.006918	0.023793	-1.85472	+
P31786	Acyl-CoA-binding protein	Dbi	-1.6969	-1.88161	-1.98574	0.002067	0.013045	-1.85475	+
Q62446	Peptidyl-prolyl cis-trans isomerase FKBP3	Fkbp3	-1.71434	-1.9815	-1.88347	0.001756	0.012172	-1.85977	+
P99029	Peroxiredoxin-5, mitochondrial	Prdx5	-1.52215	-2.16626	-1.89416	0.009915	0.029722	-1.86086	+
A2AQJ5	Transmembrane protein 87A	Tmem87a	-1.89061	-1.60553	-2.08669	0.005587	0.020829	-1.86094	+
D3Z456	39S ribosomal protein L3, mitochondrial	Mrpl3	-1.82434	-1.28078	-2.51357	0.034412	0.06871	-1.8729	+
E9PV44	ATPase inhibitor, mitochondrial	Atpif1	-1.96653	-1.79174	NA	0.029587	0.062079	-1.87913	+
Q922Q2	Serine/threonine-protein kinase RIO1	Riok1	-1.81769	-2.01853	-1.80776	0.001329	0.011333	-1.88132	+
Q91ZX7	Prolow-density lipoprotein receptor-related protein 1;Low-density lipoprotein receptor-related protein 1 85 kDa subunit;Low-density lipoprotein receptor-related protein 1 515 kDa subunit;Low-density lipoprotein receptor-related protein 1 intracellular domain	Lrp1	-1.95445	-1.64289	-2.05531	0.004312	0.018196	-1.88422	+
Q9CQU5	ZW10 interactor	Zwint	-1.82031	-1.65155	-2.18149	0.00681	0.023535	-1.88445	+
Q3UIX4		Srsf11	-1.97705	-1.47875	-2.2064	0.012704	0.034637	-1.8874	+
Q8C166	Copine-1	Cpne1	-2.68284	-1.48783	-1.49361	0.041554	0.078495	-1.88809	+
Q78XF5	Oligosaccharyltransferase complex subunit OSTC	Ostc	-2.02962	-2.09988	-1.55146	0.008177	0.026508	-1.89365	+
E9QJU8	Apoptosis-stimulating of p53 protein 2	Trp53bp2;Tp53bp2	-2.12992	-1.63939	-1.91395	0.005567	0.020824	-1.89442	+
Q8VCP8	Adenylate kinase isoenzyme 6	Ak6	-2.04532	-2.05244	-1.59033	0.006437	0.022711	-1.89603	+
O70311	Glycylpeptide N-tetradecanoyltransferase 2;Glycylpeptide N-tetradecanoyltransferase	Nmt2	-1.8705	-1.66172	-2.1733	0.006042	0.021835	-1.90184	+
P62876	DNA-directed RNA polymerases I, II, and III subunit RPABC5	Polr2l;Usp50	-1.91639	-1.73569	-2.06339	0.002465	0.014172	-1.90515	+
Q922J3	CAP-Gly domain-containing linker protein 1	Clip1	-1.14836	-2.17793	-2.39136	0.03823	0.074065	-1.90589	+
Q9CQJ6	Density-regulated protein	Denr	-1.76836	-1.7751	-2.18436	0.005151	0.019948	-1.90927	+
Q3UH06	Ras-responsive element-binding protein 1	Rreb1	-2.2423	-1.42006	-2.07963	0.016818	0.042103	-1.914	+
Q9WV32	Actin-related protein 2/3 complex subunit 1B	Arpc1b	-1.52144	-1.67752	-2.54524	0.026565	0.057485	-1.91474	+
P97355	Spermine synthase	Sms	-2.20849	-1.29712	-2.23999	0.025084	0.055272	-1.9152	+
E9Q0N0	Intersectin-1	Itsn1	-1.76972	-1.76252	-2.22293	0.006242	0.022245	-1.91839	+
Q80W54	CAAX prenyl protease 1 homolog	Zmpste24	-1.4612	-2.27525	-2.03092	0.015376	0.039651	-1.92246	+
Q9WV98	Mitochondrial import inner membrane translocase subunit Tim9	Timm9	-1.39609	-2.21963	-2.15259	0.018342	0.044612	-1.92277	+
O08529	Calpain-2 catalytic subunit	Capn2	-1.25356	-2.69119	-1.84954	0.043593	0.081583	-1.93143	+
E9Q070		Gm8730	-1.68853	-1.85858	-2.25321	0.0074	0.024767	-1.93344	+
P59470	DNA-directed RNA polymerase III subunit RPC2	Polr3b	-1.42095	-2.00652	-2.37428	0.019987	0.046866	-1.93392	+
Q9DBG9	Tax1-binding protein 3	Tax1bp3	-1.62071	-1.92933	-2.25459	0.008827	0.027705	-1.93487	+
P58044	Isopentenyl-diphosphate Delta-isomerase 1	Idi1	-2.08943	-1.85298	-1.86546	0.001571	0.011801	-1.93596	+
A2AKH7	Leucine-rich repeat-containing protein 57	Lrrc57	-2.16312	-1.90061	-1.74976	0.003862	0.017205	-1.93783	+
P41731	CD63 antigen	Cd63	-1.90929	-1.91906	-1.99395	0.00019	0.008377	-1.94077	+
Q3UUQ7	GPI inositol-deacylase	Pgap1	-2.06717	-1.95473	-1.81912	0.001354	0.011333	-1.947	+
Q61025	Intraflagellar transport protein 20 homolog	Ift20	-1.89733	-2.09963	-1.84416	0.001594	0.011805	-1.94704	+
D5MCW4	Protein CutA	Cuta	-2.09771	-2.10627	-1.64516	0.006046	0.021835	-1.94971	+
Q8JZN7	Mitochondrial Rho GTPase 2	Rhot2	-1.99439	-1.90545	NA	0.014516	0.038248	-1.94992	+
Q8BMB3	Eukaryotic translation initiation factor 4E type 2	Eif4e2	-1.71809	-2.06501	-2.08394	0.003677	0.016807	-1.95568	+
Q9QZF2	Glypican-1;Secreted glypican-1	Gpc1	-2.05779	-1.53544	-2.27912	0.012449	0.03421	-1.95745	+
Q9CPN8	Insulin-like growth factor 2 mRNA-binding protein 3	Igf2bp3	-1.67583	-2.63236	-1.56806	0.028548	0.060595	-1.95875	+
D3Z125	Tumor protein D52	Tpd52	-2.09861	-1.7481	-2.03309	0.003	0.015168	-1.95993	+
Q9Z1Z2	Serine-threonine kinase receptor-associated protein	Strap	-1.83625	-1.87791	-2.17967	0.003019	0.015204	-1.96461	+
Q9CPQ8	ATP synthase subunit g, mitochondrial	Atp5l	-2.26921	-2.07833	-1.56232	0.011293	0.032177	-1.96995	+
Q8BFZ3	Beta-actin-like protein 2	Actbl2	-1.89337	-1.7373	-2.28625	0.006786	0.023511	-1.9723	+
P61080	Ubiquitin-conjugating enzyme E2 D1	Ube2d1	-2.03398	-2.00024	-1.92443	0.000266	0.008448	-1.98622	+
P48381	Transcription factor RFX3	Rfx3	-2.07902	-1.87841	-2.00792	0.000871	0.009951	-1.98845	+
Q9WTN0	Geranylgeranyl pyrophosphate synthase	Ggps1	-2.27123	-2.1012	-1.61203	0.009669	0.029212	-1.99482	+
O88811	Signal transducing adapter molecule 2	Stam2	NA	-2.04636	-1.95367	0.014749	0.038623	-2.00002	+
Q9CQP0	39S ribosomal protein L33, mitochondrial	Mrpl33	-1.97062	-1.93205	-2.10085	0.000651	0.009388	-2.00117	+
Q3UMW8	Ceroid-lipofuscinosis neuronal protein 5 homolog	Cln5	-2.88449	-1.40201	-1.78135	0.045082	0.083587	-2.02262	+
Q9Z1P6	NADH dehydrogenase [ubiquinone] 1 alpha subcomplex subunit 7	Ndufa7	-2.13794	-2.55604	-1.37708	0.02787	0.059416	-2.02369	+
Q9CZW4	Long-chain-fatty-acid--CoA ligase 3	Acsl3	-1.85458	-2.16348	-2.05722	0.001996	0.012774	-2.0251	+
O54790	Transcription factor MafG	Mafg	-2.05225	-1.24378	-2.78491	0.044983	0.083447	-2.02698	+
P32020	Non-specific lipid-transfer protein	Scp2	-2.32705	-1.7223	-2.04953	0.00731	0.024581	-2.03296	+
Q8CFE6	Sodium-coupled neutral amino acid transporter 2	Slc38a2	-1.90743	-1.59399	-2.61541	0.021256	0.049133	-2.03895	+
Q9D2D7	Zinc finger protein 687	Znf687	-1.77258	-1.5189	-2.83712	0.036924	0.072071	-2.04286	+
Q8CDK8	Prominin-1	Prom1	-2.05541	-1.75409	-2.37622	0.007504	0.025054	-2.06191	+
P63280	SUMO-conjugating enzyme UBC9	Ube2i	-1.61476	-2.29068	-2.28976	0.01168	0.032904	-2.06506	+
F6RJC1	Teneurin-3	Tenm3	-2.30112	-1.62495	-2.27613	0.011269	0.032131	-2.0674	+
Q3URU2	Paternally-expressed gene 3 protein	Peg3	-2.26609	-2.11102	-1.83466	0.003693	0.01684	-2.07059	+
Q63810	Calcineurin subunit B type 1	Ppp3r1	-2.00963	-2.20361	-1.99951	0.001027	0.010373	-2.07092	+
F7ASG0	Mitochondrial assembly of ribosomal large subunit protein 1	Malsu1	-2.32552	-2.28822	-1.61731	0.012052	0.033707	-2.07702	+
Q99KH8	Serine/threonine-protein kinase 24;Serine/threonine-protein kinase 24 35 kDa subunit;Serine/threonine-protein kinase 24 12 kDa subunit	Stk24	-1.92894	-2.04405	-2.2607	0.002183	0.013427	-2.0779	+
P62317	Small nuclear ribonucleoprotein Sm D2	Snrpd2;Gm5449	-1.94153	-2.09954	-2.19767	0.001285	0.011087	-2.07958	+
P09542	Myosin light chain 3	Myl3	-2.16995	-2.06452	-2.00498	0.000537	0.009068	-2.07982	+
A2A4A1	DnaJ homolog subfamily C member 24	Dnajc24	-2.59214	-1.74298	-1.91378	0.015148	0.039237	-2.08297	+
P45878	Peptidyl-prolyl cis-trans isomerase FKBP2	Fkbp2	-1.63371	-2.83908	-1.80846	0.030779	0.063896	-2.09375	+
Q9JIX0	Transcription and mRNA export factor ENY2	Eny2	-2.46808	-1.63063	-2.21317	0.013594	0.036317	-2.10396	+
Q9CXU0	Mediator of RNA polymerase II transcription subunit 10	Med10	-2.44003	-1.39829	-2.51422	0.027745	0.059281	-2.11751	+
P35290	Ras-related protein Rab-24	Rab24	NA	-2.21622	-2.02039	0.029405	0.06182	-2.11831	+
Q8K2F0	Bromodomain-containing protein 3	Brd3	-1.94629	-2.30188	-2.10913	0.002344	0.013928	-2.1191	+
Q61335	B-cell receptor-associated protein 31	Bcap31	-2.27288	-1.60624	-2.52526	0.016093	0.040708	-2.13479	+
P51859	Hepatoma-derived growth factor	Hdgf	-1.7532	-1.72383	-2.93356	0.033053	0.067088	-2.13686	+
Q8CIN4	Serine/threonine-protein kinase PAK 2;PAK-2p27;PAK-2p34	Pak2	-1.91015	-2.28153	-2.22306	0.002895	0.014958	-2.13825	+
Q6PGB8	Probable global transcription activator SNF2L1	Smarca1	-2.18805	-2.24993	-1.98165	0.001433	0.011333	-2.13988	+
O08553	Dihydropyrimidinase-related protein 2	Dpysl2	-2.04422	-2.14653	-2.23113	0.000637	0.00929	-2.14063	+
Q9QZQ8	Core histone macro-H2A.1	H2afy	-1.66958	-2.29627	-2.50776	0.01333	0.035814	-2.15787	+
Q8BSN6	Vesicle-associated membrane protein 4	Vamp4	-2.60413	-1.90241	-1.999	0.010099	0.030006	-2.16851	+
Q9D7N6	39S ribosomal protein L30, mitochondrial	Mrpl30	-1.54813	-2.14824	-2.82903	0.027739	0.059281	-2.17513	+
F8VPU2	FERM, RhoGEF and pleckstrin domain-containing protein 1	Farp1	-2.388	-2.22866	-1.91032	0.00414	0.017811	-2.17566	+
P18760	Cofilin-1	Cfl1	-2.13836	-2.11194	-2.28807	0.000633	0.00929	-2.17946	+
Q06185	ATP synthase subunit e, mitochondrial	Atp5i;Atp5k	-2.29784	-2.00854	-2.23809	0.00163	0.011911	-2.18149	+
Q9WV92	Band 4.1-like protein 3;Band 4.1-like protein 3, N-terminally processed	Epb41l3	-2.2886	-2.11219	-2.15074	0.000601	0.009164	-2.18385	+
P45591	Cofilin-2	Cfl2	-1.95209	-2.15778	-2.4509	0.004351	0.018253	-2.18692	+
Q8R349	Cell division cycle protein 16 homolog	Cdc16	-1.79585	-1.96964	-2.80254	0.019548	0.046363	-2.18934	+
Q6PHU5	Sortilin	Sort1	-2.35083	-2.18003	-2.04164	0.001662	0.01195	-2.19083	+
O08749	Dihydrolipoyl dehydrogenase, mitochondrial	Dld	-2.0023	-2.13884	-2.45948	0.003771	0.016976	-2.20021	+
Q9D023	Mitochondrial pyruvate carrier 2	Mpc2	-2.62276	-1.29157	-2.73787	0.041124	0.078081	-2.2174	+
Q9CQI3	Glia maturation factor beta	Gmfb	-1.78276	-2.29247	-2.57728	0.010806	0.031381	-2.21751	+
P16546	Spectrin alpha chain, non-erythrocytic 1	Sptan1	-2.43972	-2.25076	-1.97181	0.003724	0.016884	-2.22076	+
Q9DC50	Peroxisomal carnitine O-octanoyltransferase	Crot	-2.68137	-1.4242	-2.5583	0.030949	0.064092	-2.22129	+
Q6IRU2	Tropomyosin alpha-4 chain	Tpm4	-2.25397	-2.16747	-2.25109	0.000163	0.008377	-2.22418	+
Q78XR0	Trafficking protein particle complex subunit 6A	Trappc6a	-2.5522	-1.7548	-2.38858	0.011663	0.032899	-2.23186	+
Q9CQ01	Ribonuclease T2	Rnaset2	-1.66607	-2.1485	-2.8899	0.024437	0.054353	-2.23482	+
P14069	Protein S100-A6	S100a6	-2.54707	-1.43654	-2.72177	0.030927	0.064076	-2.23513	+
Q3UQ28	Peroxidasin homolog	Pxdn	-2.34627	-2.33465	-2.0311	0.00212	0.013209	-2.23734	+
P84089	Enhancer of rudimentary homolog	Erh	-2.1104	-2.37409	-2.24162	0.001151	0.01075	-2.24204	+
Q91Z83	Myosin-7	Myh7	-1.48833	-2.68733	-2.5534	0.027427	0.058814	-2.24302	+
Q9ERR7	15 kDa selenoprotein	Sep15	-2.47918	-2.22876	-2.02705	0.003376	0.016075	-2.24499	+
P62313	U6 snRNA-associated Sm-like protein LSm6	Lsm6	-1.369	-2.70941	-2.66138	0.03613	0.070937	-2.24659	+
Q7TN05	AP-1 complex subunit sigma-3	Ap1s3	-1.77447	-2.81358	-2.1959	0.017344	0.042947	-2.26131	+
Q05816	Fatty acid-binding protein, epidermal	Fabp5	-2.42125	-2.22153	-2.15202	0.001267	0.011082	-2.26493	+
P68510	14-3-3 protein eta	Ywhah	-2.35969	-2.20789	-2.23552	0.000423	0.008448	-2.2677	+
Q9D7X8	Gamma-glutamylcyclotransferase	Ggct	-2.57028	-2.10361	-2.24176	0.003585	0.016614	-2.30522	+
Q61263	Sterol O-acyltransferase 1	Soat1	-2.30318	-2.33954	-2.29018	4.1e-05	0.007925	-2.31097	+
P14869	60S acidic ribosomal protein P0	Rplp0	-2.28563	-2.3015	-2.39748	0.000225	0.008448	-2.3282	+
Q7JCY9	ATP synthase subunit a	mt-Atp6;Mtatp6	-2.20963	-2.46839	-2.3107	0.001043	0.010373	-2.32957	+
Q3TVF4	Geranylgeranyl transferase type-2 subunit beta	Rabggtb	-2.21316	-2.28247	-2.50531	0.001423	0.011333	-2.33365	+
Q9Z130	Heterogeneous nuclear ribonucleoprotein D-like	Hnrnpdl	-2.36831	-2.35874	-2.27397	0.000165	0.008377	-2.33368	+
Q8CJH3	Plexin-B1	Plxnb1	-2.52587	-3.15944	-1.31702	0.049651	0.089634	-2.33411	+
P63276	40S ribosomal protein S17	Rps17	-2.31308	-2.20183	-2.49669	0.00135	0.011333	-2.3372	+
O70251	Elongation factor 1-beta	Eef1b;Eef1b2	-2.49186	-2.02756	-2.49783	0.004406	0.018299	-2.33908	+
V9GXI7	39S ribosomal protein L20, mitochondrial	Mrpl20	-2.16244	-2.47418	-2.384	0.001563	0.01176	-2.3402	+
Q99KC8	von Willebrand factor A domain-containing protein 5A	Vwa5a	-2.26875	-2.37219	-2.44486	0.000468	0.0087	-2.36193	+
Q78RX3	Small integral membrane protein 12	Smim12	-2.74476	-2.91111	-1.43987	0.036571	0.071637	-2.36525	+
Q9D881	Cytochrome c oxidase subunit 5B, mitochondrial	Cox5b	-2.43148	-2.65045	-2.12245	0.004043	0.017623	-2.40146	+
Q3UHX2	28 kDa heat- and acid-stable phosphoprotein	Pdap1	-2.51093	-1.6444	-3.0873	0.028869	0.061014	-2.41421	+
Q9Z0J0	Epididymal secretory protein E1	Npc2	-2.21069	-2.44252	-2.60699	0.002249	0.013657	-2.42007	+
Q9CPT4	Myeloid-derived growth factor	Mydgf	-2.34743	-2.41021	-2.50678	0.000366	0.008448	-2.42147	+
B2RUJ8	Rho GTPase-activating protein 12	Arhgap12	-2.33375	-2.38032	-2.55374	0.000762	0.009829	-2.4226	+
F6ZFT1	Acyl carrier protein;Acyl carrier protein, mitochondrial	Ndufab1	-2.08014	-2.48139	-2.71997	0.005864	0.021455	-2.42717	+
E9Q6C7		Adgrl2	-2.46955	-2.34876	-2.50523	0.000376	0.008448	-2.44118	+
E9QAN4	Kinesin-like protein;Kinesin-like protein KIF1A	Kif1a	-2.46146	-2.40877	-2.46708	5.8e-05	0.007925	-2.44577	+
E9Q557	Desmoplakin	Dsp	-2.61761	-2.4257	-2.33303	0.00116	0.010751	-2.45878	+
Q9JKX6	ADP-sugar pyrophosphatase	Nudt5	-2.52609	-2.65641	-2.19794	0.00306	0.015339	-2.46015	+
Q9WTP7	GTP:AMP phosphotransferase AK3, mitochondrial	Ak3	-2.62054	-1.7618	-3.00682	0.021594	0.04978	-2.46305	+
H7BWX9	Small ubiquitin-related modifier 2	Sumo2;Sumo3	-2.42054	-2.3531	-2.62912	0.001132	0.010695	-2.46759	+
P70335	Rho-associated protein kinase 1	Rock1	-2.95258	-1.77642	-2.67415	0.02006	0.047009	-2.46772	+
A2AHY3	DNA-binding protein inhibitor ID-1	Id1	-1.99439	-2.87465	-2.54214	0.01062	0.031096	-2.47039	+
Q9CPY1	39S ribosomal protein L51, mitochondrial	Mrpl51	-3.16189	-2.01064	-2.24509	0.019591	0.046363	-2.47254	+
Q921J2	GTP-binding protein Rheb	Rheb	-2.62652	-2.19058	-2.62168	0.003379	0.016075	-2.47959	+
O35900	U6 snRNA-associated Sm-like protein LSm2	Lsm2	-2.49079	-2.47203	-2.48788	6e-06	0.006434	-2.48357	+
O89023	Tripeptidyl-peptidase 1	Tpp1	-2.93079	-2.04788	-2.48659	0.010329	0.030433	-2.48842	+
E0CYB9	Mitochondrial fission factor	Mff	-3.01781	-2.79697	-1.67319	0.02671	0.05771	-2.49599	+
E9QPX3	NADH dehydrogenase [ubiquinone] iron-sulfur protein 4, mitochondrial	Ndufs4	-2.33567	-2.62865	-2.5393	0.001199	0.010875	-2.50121	+
Q9JJU8	SH3 domain-binding glutamic acid-rich-like protein	Sh3bgrl	-2.72525	-1.99746	-2.80274	0.010294	0.030382	-2.50848	+
Q9JHP7	KDEL motif-containing protein 1	Kdelc1	-1.78191	-2.9234	-2.82109	0.020479	0.047701	-2.5088	+
Q62048	Astrocytic phosphoprotein PEA-15	Pea15;Pea15a	-2.41566	-2.18979	-2.93389	0.007594	0.025197	-2.51311	+
Q5SVI9	Calcium/calmodulin-dependent protein kinase type II subunit beta	Camk2b	-2.05834	-2.90755	-2.58666	0.009533	0.028932	-2.51752	+
O88848	ADP-ribosylation factor-like protein 6	Arl6	-3.04776	-2.51193	-2.0085	0.013854	0.036802	-2.52273	+
Q921I6	SH3 domain-binding protein 4	Sh3bp4	-3.01639	-1.37785	-3.17694	0.048159	0.08765	-2.52373	+
Q99J36	THUMP domain-containing protein 1	Thumpd1	-2.34521	-3.22921	-2.01411	0.019944	0.046789	-2.52951	+
Q3UZ39	Leucine-rich repeat flightless-interacting protein 1	Lrrfip1	-2.85486	-1.82744	-2.92383	0.018998	0.045609	-2.53538	+
Q91Z31	Polypyrimidine tract-binding protein 2	Ptbp2	-2.29709	-2.87933	-2.43706	0.004746	0.018986	-2.53783	+
P54227	Stathmin	Stmn1	-2.86605	-2.87962	-1.8706	0.016881	0.042198	-2.53876	+
Q60648	Ganglioside GM2 activator	Gm2a	NA	-2.56265	-2.54759	0.001876	0.012436	-2.55512	+
P56379	6.8 kDa mitochondrial proteolipid	Mp68	-2.40968	-2.89953	-2.39084	0.004182	0.017869	-2.56668	+
Z4YKC4	Eukaryotic translation initiation factor 4 gamma 3	Eif4g3	-2.3887	-2.93786	-2.3934	0.00498	0.019501	-2.57332	+
P00920	Carbonic anhydrase 2	Ca2	-2.71384	-2.50918	-2.54801	0.000586	0.009164	-2.59035	+
Q9WUU7	Cathepsin Z	Ctsz	-2.71722	-2.45858	-2.60192	0.000832	0.009951	-2.59257	+
P15532	Nucleoside diphosphate kinase A;Nucleoside diphosphate kinase	Nme1	-2.99387	-2.36202	-2.43303	0.005872	0.021467	-2.5963	+
Q9CQ54	NADH dehydrogenase [ubiquinone] 1 subunit C2	Ndufc2	-2.53323	-2.55979	-2.76008	0.000747	0.009829	-2.6177	+
Q8C6I2	Succinate dehydrogenase assembly factor 2, mitochondrial	Sdhaf2	-2.49058	-2.53035	-2.85208	0.001896	0.012476	-2.62433	+
O70456	14-3-3 protein sigma	Sfn	-2.89563	-2.97359	-2.00602	0.013691	0.036506	-2.62508	+
O54962	Barrier-to-autointegration factor;Barrier-to-autointegration factor, N-terminally processed	Banf1	-2.64735	-2.54517	-2.72083	0.000373	0.008448	-2.63778	+
Q9CR02	Translation machinery-associated protein 16	Tma16	-3.62269	-2.16028	-2.13508	0.033001	0.067063	-2.63935	+
Q7TQ06	Teratocarcinoma-derived growth factor	Tdgf1	-2.73092	-2.16773	-3.03892	0.009166	0.028325	-2.64586	+
Q5DTT3	Protein FAM208B	Fam208b	-2.6562	-3.21744	-2.13912	0.01332	0.035809	-2.67092	+
Q91WN1	DnaJ homolog subfamily C member 9	Dnajc9	-1.48769	-3.01206	-3.53585	0.048784	0.088421	-2.67853	+
O08997	Copper transport protein ATOX1	Atox1	-2.47515	-3.1454	-2.45207	0.007063	0.024106	-2.69087	+
Q9EQX4	Allograft inflammatory factor 1-like	Aif1l	-2.23916	-2.43164	-3.41254	0.017701	0.043477	-2.69444	+
P30681	High mobility group protein B2	Hmgb2	-2.19972	-2.43927	-3.45431	0.019719	0.046485	-2.69777	+
E9PZ00	Prosaposin	Psap	-2.7003	-2.56345	-2.8322	0.000826	0.009951	-2.69865	+
P97315	Cysteine and glycine-rich protein 1	Csrp1	-2.49668	-2.8337	-2.81714	0.001627	0.011911	-2.71584	+
P03958	Adenosine deaminase	Ada	-2.74987	-1.90995	-3.49239	0.027148	0.058417	-2.7174	+
P63321	Ras-related protein Ral-A	Rala	-3.19269	-1.74985	-3.27265	0.031133	0.064348	-2.7384	+
P17665	Cytochrome c oxidase subunit 7C, mitochondrial	Cox7c	-2.67492	-2.67592	-2.87623	0.000595	0.009164	-2.74236	+
Q8R4N0	Citrate lyase subunit beta-like protein, mitochondrial	Clybl	-3.01769	-2.79831	-2.42406	0.003957	0.017429	-2.74668	+
P26350	Prothymosin alpha;Prothymosin alpha, N-terminally processed;Thymosin alpha	Ptma	-2.70315	-2.7193	-2.85519	0.000305	0.008448	-2.75921	+
G3UZY2	Thioredoxin, mitochondrial	Txn2	-3.0127	-1.91504	-3.36686	0.024087	0.053839	-2.76487	+
Q9D365	Signal peptidase complex subunit 3	Spcs3	-2.96985	-2.57032	-2.81239	0.001737	0.012125	-2.78419	+
Q3UH28		Zmynd8	-2.25597	-3.45652	-2.67379	0.015477	0.03984	-2.79543	+
Q9D8S4	Oligoribonuclease, mitochondrial	Rexo2	-3.45627	-2.31914	-2.6325	0.014326	0.037803	-2.80264	+
Q6NZB0	DnaJ homolog subfamily C member 8	Dnajc8	-2.78525	-2.90747	-2.7195	0.000385	0.008448	-2.80407	+
Q3TMX0	Syntenin-1	Sdcbp	-3.25862	-2.99427	-2.22911	0.011712	0.032939	-2.82733	+
Q9Z2X2	26S proteasome non-ATPase regulatory subunit 10	Psmd10	-3.37024	-2.51414	-2.59783	0.009161	0.028325	-2.8274	+
Q91YN9	BAG family molecular chaperone regulator 2	Bag2	-2.72941	-2.8006	-2.96855	0.000626	0.00929	-2.83285	+
D3YZ20	DNA-directed RNA polymerase II subunit RPB11	Polr2j	-2.56949	-3.09615	-2.85581	0.00286	0.014922	-2.84049	+
Q9R0P5	Destrin	Dstn	-2.82448	-2.79174	-2.91698	0.000174	0.008377	-2.8444	+
Q3THW5	Histone H2A.V;Histone H2A.Z;Histone H2A	H2afv;H2afz	-3.0035	-2.91633	-2.63884	0.001482	0.011437	-2.85289	+
Q9CPP6	NADH dehydrogenase [ubiquinone] 1 alpha subcomplex subunit 5	Ndufa5	-3.04778	-3.20176	-2.31455	0.009068	0.028168	-2.85469	+
Q8VHX6	Filamin-C	Flnc	-2.84635	-2.90577	-2.85914	4e-05	0.007925	-2.87042	+
Q9EQF6	Dihydropyrimidinase-related protein 5	Dpysl5	-2.77401	-2.96725	-2.88151	0.000378	0.008448	-2.87426	+
Q62347	Cyclic AMP-responsive element-binding protein 1	Creb1	-3.40487	-1.67327	-3.56867	0.04152	0.078493	-2.88227	+
Q9D1R9	60S ribosomal protein L34	Rpl34	-2.97443	-2.71017	-2.96652	0.000905	0.009951	-2.88371	+
P08207	Protein S100-A10	S100a10	-2.44147	-3.5428	-2.74585	0.012494	0.034307	-2.91004	+
Z4YKV1	Guanine nucleotide-binding protein G(s) subunit alpha isoforms short;Guanine nucleotide-binding protein G(s) subunit alpha isoforms XLas	Gnas	-2.84854	-3.50041	-2.41614	0.011434	0.032472	-2.92169	+
Q9DAU1	Protein canopy homolog 3	Cnpy3	-3.04085	-3.42083	-2.54081	0.007134	0.024202	-3.00083	+
Q62523	Zyxin	Zyx	-3.443	-2.86715	-2.69288	0.005656	0.020983	-3.00101	+
Q91VK4	Integral membrane protein 2C;CT-BRI3	Itm2c	-3.1067	-2.65349	-3.34693	0.004455	0.018407	-3.03571	+
F6QL70	60S ribosomal protein L29	Gm17669;Gm10709;Rpl29;Gm3550;Gm5218	-2.84744	-3.24677	-3.0308	0.001436	0.011333	-3.04167	+
Q80ZP8	Mesencephalic astrocyte-derived neurotrophic factor	Manf	-3.04579	-3.11472	-2.96473	0.000203	0.008448	-3.04175	+
P62774	Myotrophin	Mtpn	-3.26014	-3.15088	-2.74104	0.002672	0.014644	-3.05069	+
O70589	Peripheral plasma membrane protein CASK	Cask	-2.95192	-3.07652	-3.28338	0.000968	0.010156	-3.10394	+
E0CX98	Bax inhibitor 1	Tmbim6	-2.8036	-3.84977	-2.67205	0.014065	0.037245	-3.10847	+
A2AP78	High mobility group protein B3	Hmgb3	-2.70886	-4.33128	-2.51005	0.031298	0.064624	-3.1834	+
Q9D6K8	FUN14 domain-containing protein 2	Fundc2	-2.93733	-3.39151	-3.34318	0.001989	0.012774	-3.22401	+
Q9JL62	Glycolipid transfer protein	Gltp	-3.44292	-3.02897	-3.21151	0.001374	0.011333	-3.2278	+
H3BL81	Chromosome transmission fidelity protein 8 homolog	Chtf8	-3.07028	-3.40394	-3.26091	0.000886	0.009951	-3.24504	+
Q6ZWQ9		Myl12a	-2.92451	-3.40801	-3.45662	0.002699	0.014677	-3.26305	+
Q80U44	Zinc finger FYVE domain-containing protein 16	Zfyve16	-2.38233	-3.44536	-3.96963	0.019836	0.046588	-3.26577	+
P63028	Translationally-controlled tumor protein	Tpt1	-3.32319	-3.15563	-3.38054	0.000421	0.008448	-3.28645	+
Q8BU31	Ras-related protein Rap-2c	Rap2c	-4.1593	-2.5631	-3.14864	0.01949	0.046315	-3.29035	+
G3X8R0	Receptor expression-enhancing protein;Receptor expression-enhancing protein 5	Reep5	-3.20243	-3.29371	-3.39931	0.000297	0.008448	-3.29848	+
Q9QXS6	Drebrin	Dbn1	-3.5	-3.54051	-2.86583	0.004348	0.018253	-3.30211	+
P83882	60S ribosomal protein L36a	Rpl36a	-3.21708	-3.4023	-3.35832	0.000282	0.008448	-3.3259	+
P05132	cAMP-dependent protein kinase catalytic subunit alpha	Prkaca	-3.58163	-3.38407	-3.03233	0.002315	0.013813	-3.33267	+
P43277	Histone H1.3	Hist1h1d	-3.71362	-2.46454	-3.86186	0.017085	0.042531	-3.34667	+
Q9JL35	High mobility group nucleosome-binding domain-containing protein 5	Hmgn5	-3.12223	-3.52385	-3.67648	0.0023	0.013813	-3.44085	+
Q9EQH2	Endoplasmic reticulum aminopeptidase 1	Erap1	-3.29851	-3.50617	-3.57559	0.000578	0.009164	-3.46009	+
Q9D517	1-acyl-sn-glycerol-3-phosphate acyltransferase gamma	Agpat3	-2.97286	-3.95825	-3.60238	0.006665	0.023242	-3.51116	+
Q9D2U9	Histone H2B type 3-A;Histone H2B type 3-B;Histone H2B type 2-E	Hist3h2ba;Hist3h2bb;Hist2h2be	-3.70677	-3.60593	-3.25829	0.001483	0.011437	-3.52366	+
Q9D1H6	NADH dehydrogenase [ubiquinone] 1 alpha subcomplex assembly factor 4	Ndufaf4	-3.21782	-3.81339	-3.54002	0.002377	0.014037	-3.52375	+
Q8BGB5	LIM domain-containing protein 2	Limd2	-3.46686	-3.60372	-3.71438	0.000396	0.008448	-3.59499	+
P43274	Histone H1.4	Hist1h1e	-4.07196	-3.89472	-3.02623	0.007686	0.025397	-3.6643	+
P15864	Histone H1.2	Hist1h1c	-3.95333	-3.1588	-3.98952	0.005323	0.020283	-3.70055	+
P62751	60S ribosomal protein L23a	Rpl23a	-4.08424	-3.45184	-3.59361	0.002656	0.014598	-3.7099	+
P56389	Cytidine deaminase	Cda	-2.99451	-4.07191	-4.11458	0.00953	0.028932	-3.727	+
D3YYT0	Cadherin-2	Cdh2	-3.46117	-3.76211	-4.04662	0.002018	0.012821	-3.75663	+
A2AMW0		Capzb	-3.9035	-3.67397	-3.77981	0.000307	0.008448	-3.78576	+
Q3U125	Redox-regulatory protein FAM213A	Fam213a	-3.4128	-4.67276	-3.31519	0.012976	0.035086	-3.80025	+
Q9JJG6	Transmembrane protein 47	Tmem47	-5.19104	-2.45328	-3.85282	0.04	0.076827	-3.83238	+
P58710	L-gulonolactone oxidase	Gulo	-3.99078	-3.85306	NA	0.011176	0.031987	-3.92192	+
P43275	Histone H1.1	Hist1h1a	-5.40594	-3.69184	-2.87877	0.033091	0.067088	-3.99218	+
Q9D958	Signal peptidase complex subunit 1	Spcs1	-3.98713	NA	-4.06287	0.00599	0.021776	-4.025	+
P43276	Histone H1.5	Hist1h1b	-4.52905	-3.85172	-3.92736	0.002717	0.014732	-4.10271	+
P37804	Transgelin	Tagln	-4.21951	-4.45521	-4.15316	0.000459	0.0087	-4.27596	+
Q9DCC5	Chromobox protein homolog 3	Cbx3	-5.00379	-3.36522	-4.54922	0.012621	0.034499	-4.30608	+
Q6P5H2	Nestin	Nes	-4.39293	-4.34418	-4.1924	0.000196	0.008448	-4.30984	+
P17047	Lysosome-associated membrane glycoprotein 2	Lamp2	-4.6057	-4.50503	-4.62131	6.3e-05	0.007925	-4.57735	+
Q792Z1		Try10;Gm5771;Prss1	-4.23405	-4.85726	-5.36381	0.004566	0.018621	-4.81837	+

## Sheet: d16
ProteinIDs	Protein.names	Gene.names	log2 Ratio H/L D16_01	log2 Ratio H/L D16_02	log2 Ratio H/L D16_03	p-val D16	Adjusted p-val (BH).1	log2FC_D16	Sign p-val: 0.05 log2FC: 0.58.1
Q2Q5T5		Gm7325	4.37545	4.6013	4.60204	0.000277	0.009029	4.52626	+
Q8K3F7	L-threonine 3-dehydrogenase, mitochondrial	Tdh	4.47311	4.41195	4.54498	7.4e-05	0.008336	4.47668	+
G3UYN0	LINE-1 type transposase domain-containing protein 1	L1td1	4.517	4.27458	4.59927	0.000476	0.009072	4.46362	+
P05214	Tubulin alpha-3 chain	Tuba3a	4.54954	4.31283	4.44896	0.000239	0.008692	4.43711	+
P21995	Embigin	Emb	3.47661	4.81838	4.42781	0.008712	0.027267	4.24093	+
Q9CQS7	Developmental pluripotency-associated protein 5A;Developmental pluripotency-associated protein 5B/5C	Dppa5a;Dppa5b	4.20946	4.09392	4.27512	0.00016	0.008573	4.19283	+
Q8K354	Carbonyl reductase [NADPH] 3	Cbr3	4.1063	NA	4.24366	0.010472	0.03067	4.17498	+
P32037	Solute carrier family 2, facilitated glucose transporter member 3	Slc2a3	4.125	3.85325	4.05601	0.000413	0.009029	4.01142	+
Q8BX22	Sal-like protein 4	Sall4	4.14431	4.01886	3.86233	0.000414	0.009029	4.0085	+
Q9CWR8	DNA (cytosine-5)-methyltransferase 3-like	Dnmt3l	4.17873	3.64889	NA	0.043027	0.077516	3.91381	+
A2TJV2	Paralemmin-3	Palm3	3.81646	4.15819	3.10175	0.007031	0.023888	3.69214	+
Q6J1H4	Undifferentiated embryonic cell transcription factor 1	Utf1	4.20376	3.91331	2.88791	0.011631	0.032539	3.66833	+
Q9JIM1	Equilibrative nucleoside transporter 1	Slc29a1	3.81703	3.19708	3.90022	0.003697	0.017043	3.63811	+
Q9D8C3	Putative bifunctional UDP-N-acetylglucosamine transferase and deubiquitinase ALG13	Alg13	3.78325	3.4421	NA	0.030036	0.060485	3.61267	+
P09242	Alkaline phosphatase, tissue-nonspecific isozyme	Alpl	3.74898	3.85974	3.21164	0.003065	0.015607	3.60679	+
Q8K3Y3	Protein lin-28 homolog A	Lin28a	3.75096	NA	3.35561	0.035379	0.067722	3.55329	+
E9Q9Y4	Methylcytosine dioxygenase TET1	Tet1	3.63365	3.34762	NA	0.026069	0.055204	3.49063	+
P42209	Septin-1	Sept1	3.141	4.13129	3.1639	0.008686	0.027212	3.47873	+
Q99MV7	RING finger protein 17	Rnf17	3.09129	3.69893	3.59905	0.002938	0.01534	3.46309	+
Q9EPB4	Apoptosis-associated speck-like protein containing a CARD	Pycard	3.43478	NA	3.46577	0.002859	0.015081	3.45027	+
Q6DYE8	Ectonucleotide pyrophosphatase/phosphodiesterase family member 3;Alkaline phosphodiesterase I;Nucleotide pyrophosphatase	Enpp3	3.61476	3.12086	3.56105	0.002071	0.013505	3.43222	+
G3UWY3	Protein cordon-bleu	Cobl	3.31342	3.42037	3.53321	0.000344	0.009029	3.42233	+
P52194	Calmegin	Clgn	3.51296	3.30772	NA	0.019151	0.044404	3.41034	+
E9QKA2	Steroid hormone receptor ERR2	Esrrb	3.58263	3.64794	2.9945	0.003696	0.017043	3.40836	+
Q78IQ7	Zinc transporter ZIP4	Slc39a4	3.28881	3.13961	3.79369	0.003356	0.016282	3.40737	+
Q64280	Left-right determination factor 1;Left-right determination factor 2	Lefty1;Lefty2	3.58407	2.82824	3.72697	0.006738	0.023333	3.37976	+
O70576	Cohesin subunit SA-3	Stag3	3.33713	2.93414	3.8581	0.006216	0.022455	3.37646	+
Q60953	Protein PML	Pml	3.30043	3.40878	3.40154	0.000108	0.008532	3.37025	+
Q1PSW8	E3 ubiquitin-protein ligase TRIM71	Trim71	3.38499	3.27478	NA	0.010535	0.030795	3.32989	+
P52624	Uridine phosphorylase 1	Upp1	3.71391	2.32977	3.82179	0.020679	0.046964	3.28849	+
Q8R080	G2 and S phase-expressed protein 1	Gtse1	3.22862	3.23488	3.27449	2e-05	0.006528	3.246	+
Q8CF02	Protein FAM25C	Fam25c	3.08442	3.35692	NA	0.026915	0.056415	3.22067	+
Q09143	High affinity cationic amino acid transporter 1	Slc7a1	NA	3.23525	3.18382	0.0051	0.020144	3.20954	+
A2ANY6		Mdn1	3.1577	3.2003	NA	0.004265	0.018398	3.179	+
A2AWF2		Rex2	2.9077	3.37221	NA	0.047004	0.082862	3.13995	+
Q6PR54	Telomere-associated protein RIF1	Rif1	2.79394	2.99087	3.55898	0.005379	0.020669	3.1146	+
Q9D7F7	Charged multivesicular body protein 4c	Chmp4c	3.05538	NA	3.05684	0.000152	0.008573	3.05611	+
P11404	Fatty acid-binding protein, heart	Fabp3	3.01983	3.13711	2.98643	0.000225	0.008692	3.04779	+
Q91WE3	Ribonuclease P protein subunit p25	Rpp25	3.1723	NA	2.92031	0.026315	0.055443	3.0463	+
Q8R1S9	Sodium-coupled neutral amino acid transporter 4	Slc38a4	3.15888	3.13752	2.73748	0.002065	0.013505	3.01129	+
Q9CWH0	Developmental pluripotency-associated protein 2	Dppa2	3.083	2.87166	NA	0.022585	0.050022	2.97733	+
P34914	Bifunctional epoxide hydrolase 2;Cytosolic epoxide hydrolase 2;Lipid-phosphate phosphatase	Ephx2	3.12165	3.2184	2.5311	0.005235	0.020423	2.95705	+
P48972	Myb-related protein B	Mybl2	2.2657	2.99999	3.57297	0.016093	0.039796	2.94622	+
P14602	Heat shock protein beta-1	Hspb1	2.74341	3.22433	2.7801	0.002798	0.014901	2.91595	+
P60330	Separin	Espl1	2.9565	2.91362	2.70574	0.000733	0.009829	2.85862	+
Q9ESU7	Amino acid transporter;Neutral amino acid transporter B(0)	Slc1a5	2.73399	2.86809	NA	0.015237	0.038552	2.80104	+
Q80ZN9	Cytochrome c oxidase subunit 6B2	Cox6b2	2.50625	2.87616	2.94868	0.002425	0.014096	2.77703	+
Q80ZW2	Protein THEM6	Them6	2.65497	NA	2.84649	0.022153	0.049287	2.75073	+
Q99K30	Epidermal growth factor receptor kinase substrate 8-like protein 2	Eps8l2	2.6455	2.60998	2.98764	0.001915	0.013184	2.74771	+
Q8BRB7	Histone acetyltransferase KAT6B	Kat6b	2.64673	2.80884	NA	0.018911	0.044138	2.72779	+
E9Q7W0	Recombining binding protein suppressor of hairless	Rbpj	2.80771	2.7472	2.61537	0.000434	0.009029	2.72343	+
Q8BK58	HSPB1-associated protein 1	Hspbap1	2.87854	2.53414	2.71121	0.001346	0.011716	2.70796	+
P54276	DNA mismatch repair protein Msh6	Msh6	2.69325	2.7572	2.65485	0.000122	0.008573	2.70177	+
Q9ERG0	LIM domain and actin-binding protein 1	Lima1	2.53502	2.44749	2.96334	0.003601	0.016798	2.64862	+
P43247	DNA mismatch repair protein Msh2	Msh2	2.68452	2.65063	2.60973	6.7e-05	0.008336	2.64829	+
Q60767	Lymphocyte antigen 75	Ly75	2.64605	2.6337	NA	0.001489	0.011992	2.63987	+
Q91W43	Glycine dehydrogenase (decarboxylating), mitochondrial	Gldc	2.55813	2.54141	2.70215	0.000385	0.009029	2.60056	+
P97384	Annexin A11;Annexin	Anxa11	2.2427	3.24853	2.29117	0.015567	0.039194	2.59413	+
P70423	Cationic amino acid transporter 3	Slc7a3	2.86829	3.07134	1.83505	0.021126	0.047638	2.59156	+
Q8K298	Actin-binding protein anillin	Anln	2.43138	2.55662	2.77006	0.001458	0.011992	2.58602	+
Q5XG69	Soluble lamin-associated protein of 75 kDa	Fam169a	2.54034	2.66241	2.54182	0.000245	0.008719	2.58152	+
Q60848	Lymphocyte-specific helicase	Hells	2.61394	2.50466	2.58832	0.000165	0.008573	2.56897	+
Q8R1B7	Syntaxin-3	Stx3	3.2012	2.95612	1.54238	0.038257	0.071237	2.56656	+
P97931	Uracil-DNA glycosylase	Ung	2.93246	3.09185	1.46267	0.040562	0.07429	2.49566	+
F8VPM0	Bromodomain adjacent to zinc finger domain protein 2A	Baz2a	2.50069	2.46494	NA	0.004583	0.018981	2.48281	+
Q8R2Q8	Bone marrow stromal antigen 2	Bst2	1.55221	2.53334	3.33461	0.040785	0.074467	2.47339	+
Q9Z1S0	Mitotic checkpoint serine/threonine-protein kinase BUB1 beta	Bub1b	2.26556	2.56199	2.52761	0.001455	0.011992	2.45172	+
O35054	Claudin-4	Cldn4	2.61439	1.92457	2.7927	0.01153	0.032366	2.44389	+
Q3U3A7	Metastasis-associated protein MTA3	Mta3	2.50414	2.73411	2.07013	0.006325	0.02267	2.43613	+
P55065	Phospholipid transfer protein	Pltp	2.50757	2.58013	2.211	0.002147	0.013801	2.4329	+
Q91UZ5	Inositol monophosphatase 2	Impa2	2.49715	NA	2.36391	0.017445	0.041893	2.43053	+
Q61391	Neprilysin	Mme	2.85746	2.90319	1.44748	0.037343	0.070061	2.40271	+
Q9D903	Probable rRNA-processing protein EBP2	Ebna1bp2	2.26091	2.52677	NA	0.035314	0.067673	2.39384	+
E9QAU4	Sickle tail protein	Etl4;Skt	2.06265	2.56397	2.41888	0.003998	0.01788	2.3485	+
G3X9H7	Metastasis suppressor protein 1	Mtss1	2.25656	2.42819	2.2876	0.000516	0.009157	2.32412	+
Q8C0P0	Serine/threonine-protein kinase greatwall	Mastl	NA	2.45734	2.16403	0.040351	0.073996	2.31068	+
Q9CPX4	Ferritin;Ferritin light chain 1;Ferritin light chain 2	Ftl1;Ftl2	2.3925	2.24716	2.25544	0.00042	0.009029	2.29837	+
Q923E4	NAD-dependent protein deacetylase sirtuin-1;SirtT1 75 kDa fragment	Sirt1	2.33601	2.32112	2.20888	0.000307	0.009029	2.28867	+
Q7TNL7		Dusp9	2.38458	2.28721	2.19306	0.000583	0.009157	2.28829	+
Q9DCA5	Ribosome biogenesis protein BRX1 homolog	Brix1	2.2777	2.45139	2.08011	0.002225	0.013894	2.26973	+
E9Q5C9		Nolc1	2.41541	2.43931	1.9288	0.005367	0.020664	2.26118	+
Q8K368	Fanconi anemia group I protein homolog	Fanci	2.24248	2.20151	2.32534	0.00026	0.008805	2.25644	+
P24860	G2/mitotic-specific cyclin-B1	Ccnb1	2.311	2.19024	NA	0.017076	0.04138	2.25062	+
Q9DCJ9	N-acetylneuraminate lyase	Npl	2.30953	2.04369	2.39766	0.002228	0.013894	2.25029	+
P24288	Branched-chain-amino-acid aminotransferase, cytosolic;Branched-chain-amino-acid aminotransferase	Bcat1	2.47192	2.4496	1.79822	0.00959	0.028995	2.23991	+
Q9JLZ6	Hypermethylated in cancer 2 protein	Hic2	2.20227	2.18839	2.27861	0.000159	0.008573	2.22309	+
Q62315	Protein Jumonji	Jarid2	2.16231	2.12941	2.36849	0.001134	0.01108	2.22007	+
Q8CIH9	Amidophosphoribosyltransferase	Ppat	2.30428	2.09376	2.25894	0.00083	0.010036	2.21899	+
E9Q236		Abcc4	1.98988	2.67081	1.9761	0.010574	0.030864	2.21226	+
Q01320	DNA topoisomerase 2-alpha	Top2a	2.55444	2.45982	1.61509	0.017774	0.042286	2.20979	+
P07901	Heat shock protein HSP 90-alpha	Hsp90aa1	2.24184	2.1295	2.2146	0.000237	0.008692	2.19531	+
Q69ZN7	Myoferlin	Myof	1.70416	1.90093	2.89161	0.027603	0.057274	2.16557	+
Q3TYD6	Serine/threonine-protein kinase LMTK2	Lmtk2	2.20125	2.04462	2.22169	0.000672	0.009561	2.15585	+
Q8VDW0	ATP-dependent RNA helicase DDX39A	Ddx39a	2.19638	2.30028	1.96036	0.002176	0.013801	2.15234	+
Q8BZA9	Fructose-2,6-bisphosphatase TIGAR	Tigar	2.04574	NA	2.23198	0.027699	0.057413	2.13886	+
Q3V0C5	Ubiquitin carboxyl-terminal hydrolase 48	Usp48	1.83031	2.23739	2.33925	0.005258	0.020435	2.13565	+
O88958	Glucosamine-6-phosphate isomerase 1	Gnpda1	2.17172	NA	2.0811	0.013563	0.035865	2.12642	+
Q921J4	Ubiquitin-conjugating enzyme E2 S	Ube2s	2.177	NA	2.05696	0.018045	0.042783	2.11698	+
Q3TLP5	Enoyl-CoA hydratase domain-containing protein 2, mitochondrial	Echdc2	2.06547	2.21814	2.06592	0.000576	0.009157	2.11651	+
Q80U70	Polycomb protein Suz12	Suz12	2.10946	2.18704	2.05169	0.000343	0.009029	2.11607	+
P09803	Cadherin-1;E-Cad/CTF1;E-Cad/CTF2;E-Cad/CTF3	Cdh1	2.01293	2.2048	2.12114	0.00069	0.009561	2.11295	+
Q922S8	Kinesin-like protein KIF2C;Kinesin-like protein	Kif2c	2.11829	2.11779	2.09998	8e-06	0.006125	2.11202	+
P56677	Suppressor of tumorigenicity 14 protein homolog	St14	NA	2.11606	2.09483	0.003211	0.015919	2.10544	+
F7BJB9		Morc3	2.07141	2.31157	1.93243	0.002756	0.014833	2.10513	+
E9Q5B0	Calmodulin-regulated spectrin-associated protein 3	Camsap3	1.95647	2.18746	2.16634	0.001226	0.011384	2.10342	+
Q9WUV0	Origin recognition complex subunit 5	Orc5	NA	2.21293	1.97122	0.036736	0.069381	2.09207	+
E9Q7U2	Calcium-binding and coiled-coil domain-containing protein 1	Calcoco1	2.12027	2.14927	1.96346	0.000771	0.009991	2.07767	+
Q99NF8	Ran-binding protein 17	Ranbp17	2.20828	2.19373	1.8045	0.004061	0.017936	2.06883	+
Q8K010	5-oxoprolinase	Oplah	2.04891	1.97077	2.18444	0.00091	0.010036	2.06804	+
P35761	Dual specificity protein kinase TTK	Ttk	1.83657	2.18662	2.17171	0.003049	0.015581	2.06497	+
P97452	Ribosome biogenesis protein BOP1	Bop1	2.0827	2.19477	1.90656	0.001652	0.012455	2.06134	+
E9Q5G3	Kinesin-like protein KIF23	Kif23	2.00771	1.78997	2.3846	0.007029	0.023888	2.06076	+
Q07139	Protein ECT2	Ect2	1.72879	1.7838	2.61233	0.019037	0.044302	2.04164	+
E9QKD1	Nucleolar protein 8	Nol8	1.94067	2.20284	1.98088	0.001591	0.012341	2.04146	+
E9QAE4	Histone-lysine N-methyltransferase;Histone-lysine N-methyltransferase, H3 lysine-36 and H4 lysine-20 specific	Nsd1	1.99112	2.08198	NA	0.0142	0.036907	2.03655	+
F8WGM5	Syntaxin-binding protein 2	Stxbp2	2.07549	2.00449	2.02421	0.000108	0.008532	2.03473	+
Q6PAL0	BEN domain-containing protein 3	Bend3	2.21106	2.00363	1.87672	0.002295	0.013943	2.03047	+
J3QJU5	Lethal(2) giant larvae protein homolog 2	Llgl2	1.88846	2.06255	2.13776	0.001321	0.01163	2.02959	+
Q7TSY8	Shugoshin-like 2	Sgol2	1.74271	2.10536	2.23018	0.005166	0.020289	2.02608	+
A0A0A0MQC2	Pleckstrin homology domain-containing family G member 5	Plekhg5	1.35325	2.2667	2.45471	0.027082	0.056591	2.02489	+
Q6P9P6	Kinesin-like protein KIF11	Kif11	2.01856	2.00449	2.00656	5e-06	0.006125	2.00987	+
P27641	X-ray repair cross-complementing protein 5	Xrcc5	1.95309	1.97625	2.06537	0.000293	0.009029	1.99824	+
Q6P9R4	Rho guanine nucleotide exchange factor 18	Arhgef18	1.80461	1.95992	2.19859	0.003306	0.016101	1.98771	+
Q9CQW9	Interferon-induced transmembrane protein 3	Ifitm3	2.1588	1.67228	2.12975	0.006229	0.022484	1.98695	+
Q8BQ33	Treslin	Ticrr	2.09124	1.87496	NA	0.034681	0.066916	1.9831	+
Q61001	Laminin subunit alpha-5	Lama5	1.85615	2.10678	NA	0.040208	0.07386	1.98147	+
E9QLG3	MAX gene-associated protein	Mga	1.86237	2.093	NA	0.037078	0.069674	1.97768	+
Q3UHU5	Microtubule cross-linking factor 1	Mtcl1	1.5283	1.58385	2.81496	0.042329	0.076528	1.9757	+
E9Q3P4		Cenpf	1.97946	1.96931	NA	0.001637	0.012455	1.97438	+
A2AKX3	Probable helicase senataxin	Setx	1.92159	2.00979	NA	0.01428	0.037068	1.96569	+
Q6ZQJ5	DNA replication ATP-dependent helicase/nuclease DNA2;DNA replication nuclease DNA2;DNA replication ATP-dependent helicase DNA2	Dna2	2.03436	1.85553	2.00364	0.000789	0.009992	1.96451	+
B1ARU4	Microtubule-actin cross-linking factor 1	Macf1	1.86626	2.04754	NA	0.029467	0.059779	1.9569	+
Q9QY93	dCTP pyrophosphatase 1	Dctpp1	1.91341	NA	1.98175	0.011169	0.03183	1.94758	+
Q61937	Nucleophosmin	Npm1;Gm5611	1.8891	2.03473	1.88365	0.000653	0.009561	1.93583	+
Q640M1	U3 small nucleolar RNA-associated protein 14 homolog A	Utp14a	1.80042	2.04494	1.95503	0.001361	0.01176	1.93346	+
Q80V62	Fanconi anemia group D2 protein homolog	Fancd2	1.53787	1.92634	2.31966	0.013428	0.035657	1.92796	+
Q91YR9	Prostaglandin reductase 1	Ptgr1	1.9467	1.78073	2.04366	0.001589	0.012341	1.9237	+
Q61024	Asparagine synthetase [glutamine-hydrolyzing]	Asns	1.94681	2.16915	1.63562	0.00645	0.02294	1.91719	+
A2A432	Cullin-4B	Cul4b	1.56627	1.99884	2.17737	0.008863	0.027495	1.91416	+
Q76LV0	Glutathione peroxidase;Phospholipid hydroperoxide glutathione peroxidase, mitochondrial;Phospholipid hydroperoxide glutathione peroxidase, nuclear	Gpx4	2.13363	1.48759	2.09581	0.011852	0.032868	1.90568	+
P00920	Carbonic anhydrase 2	Ca2	1.86384	NA	1.9364	0.012153	0.03343	1.90012	+
P52734	FYVE, RhoGEF and PH domain-containing protein 1	Fgd1	1.66028	1.95443	2.08332	0.004316	0.018445	1.89935	+
F6XC25	Coiled-coil and C2 domain-containing protein 1B	Cc2d1b	1.87828	1.83363	1.94858	0.000314	0.009029	1.88683	+
E9QL25	Lysine-specific demethylase 2B	Kdm2b	NA	1.86615	1.8951	0.0049	0.019754	1.88062	+
A2A468	Nuclear receptor coactivator 3	Ncoa3	1.68912	2.32565	1.61985	0.014002	0.036531	1.87821	+
P53986	Monocarboxylate transporter 1	Slc16a1	1.85734	1.74969	2.0245	0.001809	0.012911	1.87718	+
F7ACR9		Macf1	1.77631	1.976	NA	0.033848	0.065807	1.87616	+
S4R1P5	Dystonin	Dst	1.85111	1.89754	NA	0.007885	0.0256	1.87432	+
P57787	Monocarboxylate transporter 4	Slc16a3	1.75973	1.9347	1.91879	0.00089	0.010036	1.87107	+
Q9Z321	DNA topoisomerase 3-beta-1;DNA topoisomerase	Top3b	1.95009	1.86899	1.78492	0.000651	0.009561	1.868	+
P52431	DNA polymerase delta catalytic subunit;DNA polymerase	Pold1	1.92222	1.80163	1.87295	0.000352	0.009029	1.8656	+
Q8BY71	Histone acetyltransferase type B catalytic subunit	Hat1	1.91819	1.85362	1.81441	0.000264	0.008805	1.86207	+
Q9Z0P5	Twinfilin-2	Twf2	1.96155	1.7716	1.84689	0.00088	0.010036	1.86001	+
Q9CQ37	Ubiquitin-conjugating enzyme E2 T	Ube2t	1.79183	NA	1.90584	0.019623	0.045166	1.84884	+
E9PU96	Nucleolar pre-ribosomal-associated protein 1	Urb1	1.80276	1.8946	NA	0.015809	0.039489	1.84868	+
Q9EPQ8	Transcription factor 20	Tcf20	1.75891	1.93047	NA	0.029583	0.059896	1.84469	+
Q9Z0U1	Tight junction protein ZO-2	Tjp2	1.7706	1.84926	1.90492	0.000447	0.009029	1.84159	+
P00493	Hypoxanthine-guanine phosphoribosyltransferase	Hprt1	1.38393	2.6535	1.45338	0.047141	0.083069	1.83027	+
Q7TSZ8	Nucleus accumbens-associated protein 1	Nacc1	1.84771	1.79401	1.84459	9.1e-05	0.008336	1.82877	+
P52293	Importin subunit alpha-1	Kpna2	1.84586	1.80069	1.83763	5.8e-05	0.008336	1.82806	+
Q6P9R1	ATP-dependent RNA helicase DDX51	Ddx51	NA	1.81286	1.83736	0.004272	0.018398	1.82511	+
Q61687	Transcriptional regulator ATRX	Atrx	1.74904	1.84804	NA	0.017515	0.041938	1.79854	+
P47810	Wee1-like protein kinase	Wee1	1.83802	1.74277	NA	0.01693	0.041113	1.79039	+
Q9Z204	Heterogeneous nuclear ribonucleoproteins C1/C2	Hnrnpc	1.86254	2.34809	1.14675	0.036119	0.068625	1.7858	+
Q69ZR9	Protein FAM208A	Fam208a	1.72684	1.96021	1.66937	0.002472	0.014148	1.78548	+
P13864	DNA (cytosine-5)-methyltransferase 1	Dnmt1	1.78131	1.77126	1.80313	2.8e-05	0.006528	1.78523	+
E9Q7L1		Urb2	1.77875	1.83583	1.72825	0.000304	0.009029	1.78094	+
Q5SQ20	Pescadillo homolog	Pes1	1.83537	1.86541	1.63265	0.001686	0.01251	1.77781	+
Q8R3U1	HRAS-like suppressor 3	Pla2g16	2.00787	1.21388	2.08884	0.023975	0.052197	1.7702	+
Q9WTQ5	A-kinase anchor protein 12	Akap12	1.6953	1.79268	1.81343	0.000424	0.009029	1.76714	+
Q9QWT9	Kinesin-like protein KIFC1	Kifc1	1.85301	2.05809	1.37786	0.012807	0.034648	1.76299	+
Q9R1X4	Protein timeless homolog	Timeless	1.72853	1.75328	1.7958	0.000125	0.008573	1.7592	+
Q91WM3	U3 small nucleolar RNA-interacting protein 2	Rrp9	2.13637	1.93755	1.19667	0.025477	0.054365	1.75686	+
O70400	PDZ and LIM domain protein 1	Pdlim1	1.70995	1.71539	1.82626	0.000468	0.00906	1.75053	+
E9QMN5	Transcriptional repressor p66 alpha	Gatad2a	1.69318	1.88403	1.66992	0.001501	0.012034	1.74904	+
V9GWU7	Serine/threonine-protein kinase WNK3	Wnk3	1.66651	1.80416	NA	0.025234	0.054043	1.73534	+
O88466	Zinc finger protein 106	Znf106;Zfp106	1.67656	1.78713	NA	0.020317	0.046247	1.73185	+
Q9D4G5		Pop1	1.7328	1.71779	1.73869	1.3e-05	0.006528	1.72976	+
B1AU75	Nuclear autoantigenic sperm protein	Nasp	1.73943	1.75737	1.68837	0.000143	0.008573	1.72839	+
Q9ESY9	Gamma-interferon-inducible lysosomal thiol reductase	Ifi30	1.65756	NA	1.79778	0.025821	0.054906	1.72767	+
Q08288	Cell growth-regulating nucleolar protein	Lyar	1.57495	1.95448	1.65263	0.004461	0.018815	1.72735	+
Q8CIH5	1-phosphatidylinositol 4,5-bisphosphate phosphodiesterase gamma-2	Plcg2	1.64313	1.72012	1.81468	0.000825	0.010036	1.72598	+
P52480	Pyruvate kinase PKM	Pkm	1.73666	1.69616	1.743	7.2e-05	0.008336	1.72528	+
O35654	DNA polymerase delta subunit 2	Pold2	1.88509	1.57299	1.71691	0.002722	0.014782	1.725	+
E9Q066	La-related protein 4	Larp4	1.69987	1.67997	1.7867	0.000362	0.009029	1.72218	+
Q9Z1N2	Origin recognition complex subunit 1	Orc1	1.7648	1.93178	1.46754	0.006163	0.022364	1.72137	+
O35855	Branched-chain-amino-acid aminotransferase, mitochondrial;Branched-chain-amino-acid aminotransferase	Bcat2	1.61404	1.89511	1.64694	0.002654	0.014715	1.7187	+
Q7M6U3	Inactive serine/threonine-protein kinase TEX14	Tex14	2.20911	0.947884	1.98931	0.047765	0.083772	1.71544	+
B2RY04	Dedicator of cytokinesis protein 5	Dock5	1.76233	1.71411	1.66708	0.000257	0.008793	1.71451	+
Q91YZ2	C-terminal-binding protein 2	Ctbp2	1.77531	1.75345	1.61346	0.000874	0.010036	1.71407	+
Q0VF62	Breast carcinoma-amplified sequence 3 homolog	Bcas3	1.7315	1.7399	1.66949	0.000168	0.008573	1.71363	+
Q6NS46	Protein RRP5 homolog	Pdcd11	1.87131	1.84329	1.40449	0.007756	0.025376	1.70636	+
Q5I043	Ubiquitin carboxyl-terminal hydrolase 28	Usp28	1.7193	1.81177	1.57604	0.001619	0.01244	1.70237	+
Q64737	Trifunctional purine biosynthetic protein adenosine-3;Phosphoribosylamine--glycine ligase;Phosphoribosylformylglycinamidine cyclo-ligase;Phosphoribosylglycinamide formyltransferase	Gart	1.69557	1.71107	1.69603	9e-06	0.006125	1.70089	+
E9PXY8	Ubiquitin carboxyl-terminal hydrolase	Usp7	1.68051	1.76727	1.64522	0.000456	0.009029	1.69767	+
Q9Z2M6	Ubiquitin-like protein 3	Ubl3	1.63569	1.70966	1.73518	0.00031	0.009029	1.69351	+
Q8K4R9	Disks large-associated protein 5	Dlgap5	1.55689	1.72906	1.79286	0.001728	0.012613	1.69294	+
O55100	Synaptogyrin-1	Syngr1	1.69683	NA	1.68849	0.001567	0.012298	1.69266	+
Q8BGM4		Wbscr27	1.70909	NA	1.66793	0.00776	0.025376	1.68851	+
A2AMH5	Choline transporter-like protein 1	Slc44a1	1.59598	1.7762	NA	0.033991	0.065924	1.68609	+
H3BL37	Treacle protein	Tcof1	1.71466	1.93495	1.37653	0.009265	0.028291	1.67538	+
Q6NVF4	DNA helicase B	Helb	1.9875	1.83277	1.2031	0.019911	0.045599	1.67445	+
Q91VY9	Zinc finger protein 622	Znf622	1.75287	1.31265	1.95765	0.01267	0.034481	1.67439	+
Q9DBE9	pre-rRNA processing protein FTSJ3	Ftsj3	1.40467	2.02132	1.5842	0.01181	0.032837	1.67006	+
Q9D3W4	GPN-loop GTPase 3	Gpn3	1.74847	NA	1.58009	0.032176	0.063455	1.66428	+
Q6PAV2	Probable E3 ubiquitin-protein ligase HERC4	Herc4	1.68559	1.73183	1.5624	0.000927	0.010065	1.65994	+
P10852	4F2 cell-surface antigen heavy chain	Slc3a2	1.78711	2.11871	1.06574	0.033427	0.065201	1.65719	+
B1ARB3	Platelet endothelial cell adhesion molecule	Pecam1	1.46664	1.75748	1.74443	0.003264	0.016021	1.65619	+
Q3UUW5	Cyclin-H	Ccnh	1.82098	1.40878	1.7151	0.005575	0.021096	1.64829	+
E9PV41	Protein diaphanous homolog 1	Diap1;Diaph1	1.60285	1.54716	1.79015	0.001986	0.013361	1.64672	+
A0A0A0MQ80	Spermatogenesis-associated protein 5	Spata5	1.70765	1.67017	1.55576	0.000771	0.009991	1.64453	+
E9QK83	Small subunit processome component 20 homolog	Utp20	1.55214	1.73564	NA	0.035495	0.067848	1.64389	+
Q9D826	Peroxisomal sarcosine oxidase	Pipox	1.56119	1.57235	1.77996	0.001881	0.013086	1.63783	+
Q6ZQF0	DNA topoisomerase 2-binding protein 1	Topbp1	1.63672	1.98053	1.28248	0.014885	0.038132	1.63324	+
Q8R3B1	1-phosphatidylinositol 4,5-bisphosphate phosphodiesterase delta-1	Plcd1	1.84263	1.59666	1.44474	0.005032	0.020014	1.62801	+
O09172	Glutamate--cysteine ligase regulatory subunit	Gclm	1.56562	NA	1.68796	0.023926	0.052175	1.62679	+
F8VPV0	Pericentrin	Pcnt	1.61943	1.63169	NA	0.0024	0.014056	1.62556	+
Q8K1A0	Methyltransferase-like protein 5	Mettl5	1.58457	NA	1.66108	0.015005	0.038297	1.62283	+
P54099	DNA polymerase subunit gamma-1	Polg	1.32705	1.66498	1.86844	0.009363	0.028486	1.62016	+
F6QX82	Ribonuclease 3	Drosha	1.6361	1.44178	1.77783	0.003602	0.016798	1.61857	+
O88322	Nidogen-2	Nid2	1.72457	1.8458	1.28074	0.011094	0.03175	1.61703	+
Q8VCN5	Cystathionine gamma-lyase	Cth	1.56431	1.66286	1.61703	0.000311	0.009029	1.61474	+
Q8R5K4	Nucleolar protein 6	Nol6	1.59377	1.70478	1.54481	0.000858	0.010036	1.61446	+
Q62179	Semaphorin-4B	Sema4b	1.76846	1.49005	1.57579	0.0026	0.014557	1.61143	+
Q9WVF7	DNA polymerase epsilon catalytic subunit A	Pole	1.59214	1.63064	NA	0.007605	0.025104	1.61139	+
Q8VCD7	Lysine-specific demethylase 4C	Kdm4c	1.41413	1.46393	1.9408	0.010747	0.031155	1.60628	+
Q8R3N1	Nucleolar protein 14	Nop14	1.50217	1.55352	1.76168	0.002433	0.01412	1.60579	+
Q922Y1	UBX domain-containing protein 1	Ubxn1	1.54921	1.67114	1.58809	0.000503	0.009072	1.60281	+
Q6DFV5	Probable helicase with zinc finger domain	Helz	1.36663	1.76439	1.67654	0.00562	0.021196	1.60252	+
Q8BK67	Protein RCC2	Rcc2	1.63431	1.71662	1.45499	0.002316	0.013943	1.60197	+
P61327	Protein mago nashi homolog	Magoh	1.67951	1.57073	1.54014	0.000701	0.009617	1.59679	+
Q5NC05	Transcription termination factor 2	Ttf2	1.58736	1.45633	1.74535	0.002728	0.014782	1.59634	+
P37913	DNA ligase 1;DNA ligase	Lig1	1.55507	1.56821	1.62134	0.000164	0.008573	1.58154	+
P54731	FAS-associated factor 1	Faf1	1.41582	1.58928	1.72541	0.003212	0.015919	1.57683	+
Q5EBP8	Heterogeneous nuclear ribonucleoprotein A1;Heterogeneous nuclear ribonucleoprotein A1, N-terminally processed	Hnrnpa1	1.63838	1.96739	1.10124	0.024921	0.053576	1.569	+
Q9D8Z6	Autophagy-related protein 101	Atg101	1.63119	NA	1.50554	0.025487	0.054365	1.56837	+
Q9ESX5	H/ACA ribonucleoprotein complex subunit 4	Dkc1	1.43062	1.75828	1.5044	0.003999	0.01788	1.56443	+
P17809	Solute carrier family 2, facilitated glucose transporter member 1	Slc2a1	1.53876	1.6814	1.46879	0.001598	0.012353	1.56298	+
Q99J93	Interferon-induced transmembrane protein 2	Ifitm2	1.56228	1.50256	1.61616	0.000442	0.009029	1.56033	+
Q9D2Q2	Probable tRNA (uracil-O(2)-)-methyltransferase	Trmt44	NA	1.56017	1.52927	0.006366	0.022726	1.54472	+
G3X9B1		Heatr1	1.50542	1.5272	1.59611	0.000314	0.009029	1.54291	+
Q9DB34	Charged multivesicular body protein 2a	Chmp2a	1.52353	NA	1.5622	0.007979	0.025744	1.54287	+
G3UX50	Death domain-associated protein 6	Daxx	1.79332	1.48841	1.33142	0.007687	0.025297	1.53771	+
A2AQR0	Glycerol-3-phosphate dehydrogenase;Glycerol-3-phosphate dehydrogenase, mitochondrial	Gpd2	1.52121	1.54854	1.54284	2.9e-05	0.006528	1.53753	+
Q9WV70	Nucleolar complex protein 2 homolog	Noc2l	1.48563	1.54486	1.5659	0.000246	0.008719	1.53213	+
Q9CQS2	H/ACA ribonucleoprotein complex subunit 3	Nop10	1.45761	1.76721	1.37016	0.006127	0.022333	1.53166	+
Q04692	SWI/SNF-related matrix-associated actin-dependent regulator of chromatin subfamily A containing DEAD/H box 1	Smarcad1	1.5835	1.57628	1.43029	0.001062	0.010901	1.53002	+
Q3UIL6	Pleckstrin homology domain-containing family A member 7	Plekha7	1.32602	1.66104	1.58035	0.004368	0.018584	1.52247	+
Q99KQ4	Nicotinamide phosphoribosyltransferase	Nampt	1.52151	1.5471	1.49312	0.000105	0.008532	1.52058	+
A2A9K3	Centrosomal protein of 85 kDa	Cep85	1.51447	1.60916	1.43256	0.001127	0.01108	1.51873	+
Q80Y98	Phospholipase DDHD2	Ddhd2	1.46804	1.56925	NA	0.021205	0.047764	1.51865	+
Q9WUR9	Adenylate kinase 4, mitochondrial	Ak4	1.5991	NA	1.42857	0.035817	0.068211	1.51384	+
E0CXS2	Transducin-like enhancer protein 3	Tle3	1.42512	1.57364	1.54159	0.000888	0.010036	1.51345	+
Q62018	RNA polymerase-associated protein CTR9 homolog	Ctr9	1.51912	1.73374	1.27552	0.007602	0.025104	1.50946	+
Q5XJE5	RNA polymerase-associated protein LEO1	Leo1	1.53506	1.67391	1.31939	0.004636	0.019142	1.50945	+
F7A6H4	E3 ubiquitin-protein ligase RNF213	Rnf213	1.57495	1.44341	NA	0.027727	0.057429	1.50918	+
Q9EP97	Sentrin-specific protease 3	Senp3	1.48302	1.45521	1.58911	0.00073	0.009824	1.50911	+
Q921K2	Poly [ADP-ribose] polymerase 1	Parp1	1.58428	1.42573	1.50345	0.000924	0.010065	1.50449	+
Q62383	Transcription elongation factor SPT6	Supt6h	1.40004	1.51557	1.59592	0.001426	0.011992	1.50384	+
Q03147	Cyclin-dependent kinase 7	Cdk7	1.58614	1.41972	NA	0.035211	0.067558	1.50293	+
Q62318	Transcription intermediary factor 1-beta	Trim28	1.49022	1.62542	1.38287	0.002183	0.013801	1.4995	+
P33610	DNA primase large subunit	Prim2	1.55901	1.43577	NA	0.026183	0.05529	1.49739	+
A0A023T672	RNA-binding protein 8A	RBM8;Rbm8a	1.66252	1.07917	1.74666	0.019117	0.044352	1.49612	+
Q5SWD9	Pre-rRNA-processing protein TSR1 homolog	Tsr1	1.3909	1.58934	1.50365	0.001475	0.011992	1.49463	+
Q6NZL1		Dhx37	1.49754	1.42723	1.55039	0.000571	0.009157	1.49172	+
Q61510	E3 ubiquitin/ISG15 ligase TRIM25	Trim25	1.56685	1.34533	1.56266	0.002396	0.014056	1.49162	+
E9QN31	Probable 28S rRNA (cytosine-C(5))-methyltransferase	Nop2	1.44244	1.68743	1.3416	0.004713	0.019283	1.49049	+
Q60520	Paired amphipathic helix protein Sin3a	Sin3a	1.45338	1.54124	1.46664	0.000338	0.009029	1.48709	+
B9EJX5	Transcription initiation factor TFIID subunit 2	Taf2	1.42031	1.42866	1.60668	0.00167	0.012494	1.48522	+
Q8BFP9	[Pyruvate dehydrogenase (acetyl-transferring)] kinase isozyme 1, mitochondrial	Pdk1	1.40572	1.56296	1.47853	0.000938	0.010108	1.4824	+
Q9D8X5	CCR4-NOT transcription complex subunit 8	Cnot8	1.46727	NA	1.49748	0.006488	0.023053	1.48237	+
Q921N6	Probable ATP-dependent RNA helicase DDX27	Ddx27	1.511	1.57364	1.35876	0.00185	0.013071	1.48113	+
Q80TR8	Protein VPRBP	Vprbp	1.47863	1.51416	1.44608	0.000177	0.008631	1.47962	+
Q8BLH7	HIRA-interacting protein 3	Hirip3	1.49921	1.529	1.40855	0.000599	0.009211	1.47892	+
A2BE93	Protein SET	Set	1.21509	1.24384	1.96145	0.026371	0.055445	1.47346	+
B2RWS6	Histone acetyltransferase p300	Ep300	1.44315	1.5006	NA	0.012421	0.034008	1.47187	+
Q99ME9	Nucleolar GTP-binding protein 1	Gtpbp4	1.41863	1.73414	1.25829	0.008917	0.027597	1.47036	+
P70700	DNA-directed RNA polymerase I subunit RPA2	Polr1b	1.4594	1.51571	1.43	0.000293	0.009029	1.46837	+
Q80Y44	Probable ATP-dependent RNA helicase DDX10	Ddx10	1.50156	1.95409	0.944145	0.037446	0.070173	1.4666	+
Q9CPS7	RNA-binding protein PNO1	Pno1	1.49152	NA	1.43902	0.011404	0.0322	1.46527	+
P33609	DNA polymerase alpha catalytic subunit	Pola1	1.51544	1.53662	1.31238	0.002405	0.014062	1.45481	+
A6ZI44	Fructose-bisphosphate aldolase	Aldoa;Aldoart1	1.40418	1.46428	1.4906	0.00031	0.009029	1.45302	+
P30416	Peptidyl-prolyl cis-trans isomerase FKBP4;Peptidyl-prolyl cis-trans isomerase FKBP4, N-terminally processed;Peptidyl-prolyl cis-trans isomerase	Fkbp4	1.46088	1.43143	1.45485	3.8e-05	0.006763	1.44906	+
Q9D666	SUN domain-containing protein 1	Sun1	1.44835	1.69142	1.197	0.009608	0.028995	1.44559	+
Q07832	Serine/threonine-protein kinase PLK1	Plk1	1.44181	1.44869	NA	0.001515	0.012097	1.44525	+
A0A0A0MQ99	DNA repair protein SWI5 homolog	Swi5	1.58299	1.2273	1.52388	0.005752	0.021479	1.44472	+
Q9Z2H5	Band 4.1-like protein 1	Epb41l1	1.52278	1.35144	1.45548	0.00119	0.011257	1.44323	+
B1AUR6	Protein MMS22-like	Mms22l	1.33677	1.54328	NA	0.045571	0.081013	1.44003	+
G3UY19	Protein regulator of cytokinesis 1	Prc1	1.56678	1.20517	1.54251	0.00652	0.023069	1.43815	+
P53569	CCAAT/enhancer-binding protein zeta	Cebpz	1.34169	1.42316	1.53007	0.001448	0.011992	1.43164	+
Q8CJ53	Cdc42-interacting protein 4	Trip10	1.53683	1.4415	1.3157	0.001996	0.013361	1.43134	+
A2A7S8	Uncharacterized protein KIAA1522	Kiaa1522	1.05187	1.67072	1.55072	0.017238	0.041639	1.42443	+
Q3URQ0	Testis-expressed sequence 10 protein	Tex10	1.39237	1.52527	1.35524	0.001311	0.0116	1.42429	+
Q9CQF6	L-aminoadipate-semialdehyde dehydrogenase-phosphopantetheinyl transferase	Aasdhppt	1.35056	1.49605	NA	0.032509	0.063903	1.4233	+
Q6PGF5		Bms1	1.34744	1.51745	1.40123	0.001242	0.011406	1.42204	+
Q8K224	N-acetyltransferase 10	Nat10	1.41332	1.45926	1.38479	0.000234	0.008692	1.41912	+
Q6NV99		Haus6	1.44639	1.42473	1.38398	0.000166	0.008573	1.41837	+
Q7TPV4	Myb-binding protein 1A	Mybbp1a	1.39057	1.46865	1.38655	0.000356	0.009029	1.41526	+
O88735	Ensconsin	Map7	1.31804	1.44608	1.47176	0.001132	0.01108	1.41196	+
Q9WVE8	Protein kinase C and casein kinase substrate in neurons protein 2	Pacsin2	1.45682	1.45451	1.32016	0.001024	0.010729	1.4105	+
Q9DBD5	Proline-, glutamic acid- and leucine-rich protein 1	Pelp1	1.39319	1.49707	1.32208	0.001307	0.0116	1.40411	+
Q5SV02	DNA repair protein RAD50	Rad50	1.45393	1.40625	1.3444	0.000511	0.009157	1.40152	+
Q61466	SWI/SNF-related matrix-associated actin-dependent regulator of chromatin subfamily D member 1	Smarcd1	1.01866	1.65185	1.53352	0.0187	0.043829	1.40135	+
O88796	Ribonuclease P protein subunit p30	Rpp30	1.41163	NA	1.38948	0.005033	0.020014	1.40055	+
Q9D0I8	mRNA turnover protein 4 homolog	Mrto4	1.30906	NA	1.48773	0.040615	0.074347	1.39839	+
P97329	Kinesin-like protein KIF20A	Kif20a	1.42144	1.33275	1.43618	0.000534	0.009157	1.39679	+
Q9QYI3	DnaJ homolog subfamily C member 7	Dnajc7	1.50988	1.42216	1.25025	0.002978	0.015438	1.39409	+
Q80UW8	DNA-directed RNA polymerases I, II, and III subunit RPABC1	Polr2e	1.2953	NA	1.48841	0.044093	0.078951	1.39186	+
O54825	Bystin	Bysl	1.3727	1.44256	1.35554	0.000366	0.009029	1.39026	+
Q99LH1	Nucleolar GTP-binding protein 2	Gnl2	1.39906	1.42809	1.33758	0.000369	0.009029	1.38824	+
P52432	DNA-directed RNA polymerases I and III subunit RPAC1	Polr1c	1.38992	1.377	1.38457	7e-06	0.006125	1.38383	+
Q8R3F9	Speckle targeted PIP5K1A-regulated poly(A) polymerase	Tut1	1.51371	1.21537	1.41417	0.004008	0.01788	1.38109	+
P97304	DNA-directed RNA polymerases I and III subunit RPAC2	Polr1d	1.51739	1.09713	1.5184	0.010207	0.030178	1.37764	+
E9QKK1	Kinesin-like protein	Cenpe	1.44875	1.3025	NA	0.033809	0.06579	1.37562	+
Q8C4J7	Transducin beta-like protein 3	Tbl3	1.4109	1.53252	1.18076	0.005582	0.021096	1.37472	+
Q6P5B0	RRP12-like protein	Rrp12	1.34262	1.40052	1.35681	0.000162	0.008573	1.36665	+
O35134	DNA-directed RNA polymerase I subunit RPA1	Polr1a	1.31148	1.38084	1.4042	0.000416	0.009029	1.36551	+
E9QL53	Citron Rho-interacting kinase	Cit	1.34811	1.37278	NA	0.005772	0.02151	1.36045	+
Q80XC6	Protein NRDE2 homolog	Nrde2	NA	1.27168	1.44868	0.041363	0.075253	1.36018	+
A0A0A0MQ73	Histone-lysine N-methyltransferase;Histone-lysine N-methyltransferase 2D	Kmt2d	1.28916	1.42944	NA	0.03282	0.064292	1.3593	+
E9QPN7	Dedicator of cytokinesis protein 6	Dock6	1.39564	1.41951	1.26126	0.001311	0.0116	1.3588	+
P97821	Dipeptidyl peptidase 1;Dipeptidyl peptidase 1 exclusion domain chain;Dipeptidyl peptidase 1 heavy chain;Dipeptidyl peptidase 1 light chain	Ctsc	1.36979	1.37752	1.32737	0.000132	0.008573	1.35823	+
E9QPB3	WD repeat and HMG-box DNA-binding protein 1	Wdhd1	1.36588	1.31651	1.37801	0.000193	0.008631	1.35347	+
Q9CQH8	Ribonuclease P protein subunit p14	Rpp14	1.39335	NA	1.30913	0.019835	0.045475	1.35124	+
P55302	Alpha-2-macroglobulin receptor-associated protein	Lrpap1	1.3836	1.21347	1.45464	0.002795	0.014901	1.35057	+
Q9CQQ4	Gem-associated protein 2	Gemin2	1.40564	NA	1.29387	0.026344	0.055443	1.34976	+
Q8K119		Pms1	1.29836	1.38393	1.35741	0.000353	0.009029	1.34657	+
E9Q784		Zc3h13	1.31295	1.37715	NA	0.01519	0.038463	1.34505	+
Q8C605	ATP-dependent 6-phosphofructokinase;ATP-dependent 6-phosphofructokinase, platelet type	Pfkp	1.16456	1.32672	1.5429	0.006576	0.023146	1.34473	+
Q99KE1	NAD-dependent malic enzyme, mitochondrial	Me2	1.16762	1.28772	1.57823	0.008118	0.02607	1.34452	+
F8VQB6	Unconventional myosin-X	Myo10	1.04876	1.10669	1.86597	0.036478	0.069071	1.34047	+
Q3UFM5	Nucleolar MIF4G domain-containing protein 1	Nom1	1.85164	1.14346	1.02577	0.035095	0.06746	1.34029	+
Q3TAQ9		Wdr36	1.38918	1.46163	1.15677	0.004705	0.01927	1.33586	+
B2RRI2	Protein strawberry notch homolog 1	Sbno1	1.26266	1.36036	1.37261	0.000682	0.009561	1.33188	+
Q9JK38	Glucosamine 6-phosphate N-acetyltransferase	Gnpnat1	1.23283	NA	1.4295	0.046944	0.082862	1.33116	+
Q3TFP0	Serine/arginine-rich splicing factor 10	Srsf10	1.56272	1.56465	0.862592	0.029515	0.059818	1.32999	+
Q8C253	Galectin;Galectin-3	Lgals3	1.33465	1.41857	1.23051	0.001674	0.012494	1.32791	+
A2BE28	Ribosomal biogenesis protein LAS1L	Las1l	1.3582	1.40639	1.21563	0.001858	0.01308	1.32674	+
G3UWX1	Replication factor C subunit 1	Rfc1	1.3683	0.989255	1.61785	0.018491	0.043513	1.32513	+
Q1HFZ0	tRNA (cytosine(34)-C(5))-methyltransferase	Nsun2	1.30228	1.35811	1.31485	0.000163	0.008573	1.32508	+
Q3U5F4	YrdC domain-containing protein, mitochondrial	Yrdc	1.36062	NA	1.28728	0.017629	0.04204	1.32395	+
Q9D0D4	Probable dimethyladenosine transferase	Dimt1	1.28802	NA	1.35156	0.015321	0.038716	1.31979	+
Q8K389	CDK5 regulatory subunit-associated protein 2	Cdk5rap2	1.32953	1.30226	NA	0.006595	0.023176	1.3159	+
P97310	DNA replication licensing factor MCM2	Mcm2	1.33021	1.37404	1.23859	0.000921	0.010065	1.31428	+
Q6P0X2	Zinc finger protein 511	Znf511	1.28133	NA	1.34696	0.015895	0.039614	1.31414	+
Q8CJF7	Protein ELYS	Ahctf1	1.33754	1.01995	1.58259	0.015033	0.03832	1.31336	+
A2AFQ9		Gemin5	1.26212	1.34956	1.30603	0.000373	0.009029	1.3059	+
E9Q2H1		Ubr5	1.31493	1.29571	NA	0.004687	0.019236	1.30532	+
Q8VCB1	Nucleoporin NDC1	Ndc1	1.34254	1.31835	1.25492	0.0004	0.009029	1.30527	+
Q61881	DNA replication licensing factor MCM7	Mcm7	1.32259	1.39067	1.19734	0.001881	0.013086	1.30354	+
Q9Z127	Large neutral amino acids transporter small subunit 1	Slc7a5	1.41686	1.44763	1.04171	0.009894	0.029595	1.30207	+
Q99L47	Hsc70-interacting protein	St13	1.26597	1.30024	1.33819	0.000257	0.008793	1.30146	+
Q5SS00	DBF4-type zinc finger-containing protein 2 homolog	Zdbf2	1.23356	1.36043	NA	0.031113	0.061791	1.297	+
A2A4P0	ATP-dependent RNA helicase DHX8	Dhx8	1.28618	1.49394	1.11069	0.007215	0.024247	1.29693	+
P13439	Uridine 5-monophosphate synthase;Orotate phosphoribosyltransferase;Orotidine 5-phosphate decarboxylase	Umps	1.30324	1.3018	1.2824	2.7e-05	0.006528	1.29581	+
F8WJA0	ATP-dependent RNA helicase DDX24	Ddx24	1.29416	1.45975	1.13335	0.005247	0.020429	1.29575	+
Q91ZW3	SWI/SNF-related matrix-associated actin-dependent regulator of chromatin subfamily A member 5	Smarca5	1.37964	1.54572	0.96179	0.017503	0.041938	1.29572	+
Q9CWX9	Probable ATP-dependent RNA helicase DDX47	Ddx47	1.20953	1.03707	1.63611	0.018403	0.043381	1.29424	+
Q3TZX8	Polynucleotide 5-hydroxyl-kinase NOL9	Nol9	1.20479	1.40502	1.27043	0.00207	0.013505	1.29341	+
P25206	DNA replication licensing factor MCM3	Mcm3	1.3349	1.34322	1.19759	0.001333	0.011647	1.2919	+
P24547	Inosine-5-monophosphate dehydrogenase 2	Impdh2	1.38022	1.21504	1.2771	0.00139	0.011875	1.29079	+
P28658	Ataxin-10	Atxn10	1.31735	1.22295	1.33096	0.000692	0.009561	1.29042	+
Q9D0R4	Probable ATP-dependent RNA helicase DDX56	Ddx56	1.23484	1.3944	1.24013	0.001642	0.012455	1.28979	+
P98203	Armadillo repeat protein deleted in velo-cardio-facial syndrome homolog	Arvcf	1.37145	1.46518	1.02841	0.010452	0.030651	1.28835	+
S4R2E1	ATP-binding cassette sub-family G member 2	Abcg2	1.32234	1.03069	1.50723	0.011422	0.032217	1.28675	+
Q9CR29	Coiled-coil domain-containing protein 43	Ccdc43	1.29539	NA	1.2615	0.008438	0.026822	1.27844	+
P59235	Nucleoporin Nup43	Nup43	1.1589	1.25184	1.42021	0.003567	0.016714	1.27698	+
Q9CR08	Ribonuclease P protein subunit p29	Pop4	1.18481	NA	1.36741	0.045469	0.080887	1.27611	+
Q9D0F6	Replication factor C subunit 5	Rfc5	1.21814	1.33267	1.25757	0.0007	0.009617	1.26946	+
D3YVL0	Putative helicase MOV-10	Mov10	1.29075	1.36185	1.14615	0.002502	0.014207	1.26625	+
E9QNN1		Dhx9	1.35795	1.69142	0.748662	0.044389	0.079343	1.26601	+
P84104	Serine/arginine-rich splicing factor 3	Srsf3;Gm12355	1.01346	1.60501	1.17915	0.018826	0.043998	1.26587	+
Q8CD92	Tetratricopeptide repeat protein 27	Ttc27	1.33524	1.18877	NA	0.036902	0.069439	1.262	+
G3XA21		Mroh1	1.2452	1.1465	1.37283	0.002715	0.014782	1.25484	+
Q4VBE8	WD repeat-containing protein 18	Wdr18	1.05786	1.35497	1.3496	0.00607	0.022161	1.25414	+
Q8BIW9	Chromosome transmission fidelity protein 18 homolog	Chtf18	1.473	1.51899	0.759358	0.036564	0.06912	1.25045	+
Q9CWR2	Histone-lysine N-methyltransferase SMYD3	Smyd3	1.27238	1.20941	1.26438	0.000251	0.008733	1.24872	+
P49717	DNA replication licensing factor MCM4	Mcm4	1.28943	1.31805	1.13553	0.002057	0.013505	1.24767	+
P97311	DNA replication licensing factor MCM6;DNA helicase	Mcm6	1.28785	1.32166	1.13291	0.002163	0.013801	1.24747	+
E9PUB7	Protein misato homolog 1	Msto1	1.27291	1.31134	1.1503	0.001518	0.012097	1.24485	+
P16125	L-lactate dehydrogenase B chain;L-lactate dehydrogenase	Ldhb	1.49381	1.12423	1.11282	0.009974	0.029748	1.24362	+
Q8BTE5	Protein CEBPZOS	Cebpzos	1.0823	1.23449	1.41288	0.005853	0.021698	1.24322	+
A0A087WQ16	DNA mismatch repair protein Msh3	Msh3	1.65565	1.1066	0.961593	0.027794	0.057492	1.24128	+
Q52KC3	DNA helicase;DNA replication licensing factor MCM5	Mcm5	1.2875	1.30335	1.12158	0.002199	0.013801	1.23747	+
P05201	Aspartate aminotransferase, cytoplasmic	Got1	1.2221	1.33183	1.15143	0.001801	0.012898	1.23512	+
Q9D0R2	Threonine--tRNA ligase, cytoplasmic	Tars	1.21823	1.32618	1.15143	0.001703	0.012529	1.23195	+
Q791N7	DNA-directed RNA polymerase I subunit RPA12	Znrd1	1.15611	1.41001	1.11981	0.005475	0.020887	1.22864	+
B7ZP47	Wings apart-like protein homolog	Wapal	1.21111	1.25642	1.20177	0.00019	0.008631	1.2231	+
Q8BW10	RNA-binding protein NOB1	Nob1	1.31329	1.27096	1.08142	0.003387	0.016394	1.22189	+
Q8BL97	Serine/arginine-rich splicing factor 7	Srsf7	1.12927	1.68928	0.835856	0.039733	0.073239	1.21814	+
Q99M31	Heat shock 70 kDa protein 14	Hspa14	1.26935	1.19858	1.18008	0.0005	0.009072	1.21601	+
Q9DCL9	Multifunctional protein ADE2;Phosphoribosylaminoimidazole-succinocarboxamide synthase;Phosphoribosylaminoimidazole carboxylase	Paics	1.25979	1.21834	1.16587	0.0005	0.009072	1.21467	+
P70444	BH3-interacting domain death agonist;BH3-interacting domain death agonist p15;BH3-interacting domain death agonist p13;BH3-interacting domain death agonist p11	Bid	1.20832	NA	1.21662	0.002179	0.013801	1.21247	+
Q9CY58	Plasminogen activator inhibitor 1 RNA-binding protein	Serbp1	1.22477	1.45493	0.954778	0.013936	0.036453	1.21149	+
H3BKS8	tRNA (guanine(26)-N(2))-dimethyltransferase	Trmt1	1.44528	1.18219	1.00603	0.010922	0.031544	1.21117	+
P52479	Ubiquitin carboxyl-terminal hydrolase 10	Usp10	1.19413	1.37862	1.05137	0.006093	0.022225	1.20804	+
Q922Q4	Pyrroline-5-carboxylate reductase 2	Pycr2	1.1563	1.30506	1.16141	0.001626	0.012451	1.20759	+
Q3UVK0	Endoplasmic reticulum metallopeptidase 1	Ermp1	1.21998	1.25329	1.14632	0.000685	0.009561	1.20653	+
Q9DBY8	Nuclear valosin-containing protein-like	Nvl	1.2918	1.34903	0.97112	0.009406	0.028573	1.20398	+
E9Q7L0		Ogdhl	1.23274	1.23962	1.13937	0.00072	0.009743	1.20391	+
Q9JK91	DNA mismatch repair protein Mlh1	Mlh1	1.24066	NA	1.16647	0.019616	0.045166	1.20356	+
O70551	SRSF protein kinase 1	Srpk1	1.36605	1.48224	0.759472	0.033011	0.064574	1.20259	+
Q99LE6	ATP-binding cassette sub-family F member 2	Abcf2	1.26293	1.27589	1.06757	0.003127	0.015825	1.20213	+
Q3UI84	Replication factor C subunit 4	Rfc4	1.43134	1.09408	1.07041	0.009326	0.028435	1.19861	+
P54729	NEDD8 ultimate buster 1	Nub1	1.27442	1.09021	1.22206	0.002095	0.013602	1.19556	+
Q6P6L6		Gemin4	1.20059	1.18843	1.19323	9e-06	0.006125	1.19409	+
O70546	Lysine-specific demethylase 6A	Kdm6a	1.29004	1.19415	1.09514	0.002217	0.013867	1.19311	+
Q9D0B0	Serine/arginine-rich splicing factor 9	Srsf9	1.16255	NA	1.22215	0.015907	0.039614	1.19235	+
P58468	Protein FAM207A	Fam207a	1.10333	NA	1.28106	0.047364	0.083283	1.19219	+
F8VQ29		Iqgap3	1.34339	1.04425	1.18853	0.005209	0.020366	1.19205	+
O70378	ER membrane protein complex subunit 8	Emc8	1.18887	NA	1.19357	0.001255	0.011451	1.19122	+
A2A9P6	Cyclin-dependent kinase 11B	Cdk11b	1.28908	1.44453	0.835856	0.022748	0.0503	1.18982	+
F8VPY2	Transcription initiation factor TFIID subunit 5	Taf5	1.16972	1.33943	1.0594	0.004655	0.019181	1.18952	+
D6RHA2	N-acylglucosamine 2-epimerase	Renbp	1.2087	0.905086	1.45058	0.017188	0.041542	1.18812	+
Q9Z1B5	Mitotic spindle assembly checkpoint protein MAD2A	Mad2l1	1.21925	NA	1.15436	0.017398	0.041829	1.1868	+
P56390	Cyclin-dependent kinases regulatory subunit 2	Cks2	1.23748	1.0116	1.30928	0.005669	0.021306	1.18612	+
Q543K9	Purine nucleoside phosphorylase	Pnp	1.15389	NA	1.21778	0.017145	0.041488	1.18583	+
B2RRE7	OTU domain-containing protein 4	Otud4	1.00257	1.26515	1.28342	0.005823	0.021627	1.18372	+
Q06180	Tyrosine-protein phosphatase non-receptor type 2;Tyrosine-protein phosphatase non-receptor type	Ptpn2	1.13652	1.1859	1.22519	0.00047	0.00906	1.18254	+
Q9EP71	Ankycorbin	Rai14	1.08311	1.06282	1.38838	0.007895	0.025613	1.1781	+
Q922D8	C-1-tetrahydrofolate synthase, cytoplasmic;Methylenetetrahydrofolate dehydrogenase;Methenyltetrahydrofolate cyclohydrolase;Formyltetrahydrofolate synthetase;C-1-tetrahydrofolate synthase, cytoplasmic, N-terminally processed	Mthfd1	1.17809	1.09525	1.25701	0.001571	0.012306	1.17678	+
E9Q1V5		Smpd4	1.22523	1.17957	1.12484	0.000608	0.009274	1.17654	+
E9Q3G8		Nup153	1.06793	1.35983	1.08124	0.006554	0.023128	1.16967	+
Q9CRA8	Exosome complex component RRP46	Exosc5	1.22706	NA	1.10811	0.032402	0.063778	1.16758	+
E9QAF9	Protein TANC1	Tanc1	1.09602	1.09713	1.28964	0.003059	0.015595	1.16093	+
Q62074	Protein kinase C iota type	Prkci	1.18859	1.08244	1.20834	0.001134	0.01108	1.15979	+
Q8C3Y4	Kinetochore-associated protein 1	Kntc1	1.22063	1.13981	1.11512	0.000755	0.009991	1.15852	+
Q9WU84	Copper chaperone for superoxide dismutase	Ccs	1.16896	NA	1.14762	0.005864	0.0217	1.15829	+
E9QP00	Transformer-2 protein homolog alpha	Tra2a	1.22917	1.55548	0.687659	0.044631	0.079645	1.15743	+
Q8BK64	Activator of 90 kDa heat shock protein ATPase homolog 1	Ahsa1	1.10802	1.18717	1.17703	0.000461	0.009038	1.15741	+
P56213	FAD-linked sulfhydryl oxidase ALR	Gfer	1.1217	NA	1.18878	0.018478	0.043507	1.15524	+
G3X957	Liprin-beta-2	Ppfibp2	0.934791	0.954334	1.56493	0.030799	0.061448	1.15135	+
Q5SUR0	Phosphoribosylformylglycinamidine synthase	Pfas	1.15543	1.24092	1.05516	0.00217	0.013801	1.1505	+
Q9D083	Kinetochore protein Spc24	Spc24	1.18623	NA	1.11459	0.019816	0.045475	1.15041	+
E9QPI5	Sister chromatid cohesion protein PDS5 homolog A	Pds5a	1.12613	1.23954	1.07679	0.001758	0.012707	1.14749	+
Q8BGD9	Eukaryotic translation initiation factor 4B	Eif4b	1.07935	1.25015	1.10249	0.002179	0.013801	1.144	+
Q8R3C6	Probable RNA-binding protein 19	Rbm19	1.11478	1.16826	1.13745	0.000185	0.008631	1.14016	+
Q9CW03	Structural maintenance of chromosomes protein 3	Smc3	1.16915	1.22918	1.01887	0.003002	0.015476	1.13907	+
Q64674	Spermidine synthase	Srm	1.04668	1.16621	1.19088	0.001537	0.012161	1.13459	+
Q9CPT5	Nucleolar protein 16	Nop16	1.15948	NA	1.10775	0.014521	0.037411	1.13361	+
Q9D6Z1	Nucleolar protein 56	Nop56	1.08756	1.30234	1.01004	0.005898	0.021784	1.13331	+
Q80U72	Protein scribble homolog	Scrib	0.954421	1.14216	1.29387	0.007462	0.024856	1.13015	+
P97314	Cysteine and glycine-rich protein 2	Csrp2	1.04127	NA	1.21786	0.049664	0.08601	1.12956	+
Q8R081	Heterogeneous nuclear ribonucleoprotein L	Hnrnpl	1.20115	1.43179	0.755726	0.029498	0.059813	1.12956	+
P97765	WW domain-binding protein 2	Wbp2	0.990523	1.18211	1.2158	0.003836	0.017479	1.12948	+
Q8C3I8	Protein HGH1 homolog	Hgh1	1.11923	1.13396	1.12932	1.5e-05	0.006528	1.1275	+
Q9JJY4	Probable ATP-dependent RNA helicase DDX20	Ddx20	1.13045	1.23115	1.02086	0.002888	0.015133	1.12749	+
Q8C0L6	Peroxisomal N(1)-acetyl-spermine/spermidine oxidase	Paox	1.25431	0.886838	1.23419	0.011053	0.0317	1.12511	+
Q9D0T1	NHP2-like protein 1;NHP2-like protein 1, N-terminally processed	Nhp2l1	1.04834	1.20916	1.08604	0.001893	0.013144	1.11451	+
Q8R323	Replication factor C subunit 3	Rfc3	1.06085	1.12308	1.12861	0.000387	0.009029	1.10418	+
E9Q3F7	Retrotransposon-derived protein PEG10	Peg10	1.02458	0.927955	1.35786	0.013642	0.035981	1.10347	+
Q8BSZ2	AP-3 complex subunit sigma-2	Ap3s2	1.05486	1.21256	1.04198	0.002462	0.014148	1.10314	+
Q9CYG7	Mitochondrial import receptor subunit TOM34	Tomm34	1.11011	1.1432	1.05543	0.000538	0.009157	1.10291	+
Q9CXF7	Chromodomain-helicase-DNA-binding protein 1-like	Chd1l	1.08594	1.07262	1.14511	0.000409	0.009029	1.10122	+
Q3TW96	UDP-N-acetylhexosamine pyrophosphorylase-like protein 1	Uap1l1	1.10652	1.07963	1.11557	9.6e-05	0.008398	1.10057	+
Q8R2K3	Single-stranded DNA-binding protein;Single-stranded DNA-binding protein, mitochondrial	Ssbp1	1.29039	0.943302	1.06078	0.008505	0.026924	1.09816	+
Q9WUK4	Replication factor C subunit 2	Rfc2	0.895403	0.841626	1.55654	0.041152	0.075006	1.09786	+
F8WIG5	Protein diaphanous homolog 3	Diap3;Diaph3	0.898285	1.14268	1.24589	0.008734	0.027298	1.09562	+
P09405	Nucleolin	Ncl	1.27841	1.02994	0.977956	0.007087	0.023996	1.09544	+
D3Z7G3	Uncharacterized protein C10orf35 homolog	2010107G23Rik	1.03143	1.06402	1.19004	0.001944	0.0133	1.09516	+
Q91YM4	Protein TBRG4	Tbrg4	1.02152	1.12923	1.13265	0.00111	0.011065	1.09447	+
P59242	Cingulin	Cgn	1.12937	0.932586	1.21984	0.005955	0.021898	1.09393	+
Q9JKF1	Ras GTPase-activating-like protein IQGAP1	Iqgap1	1.02943	1.09704	1.14068	0.000882	0.010036	1.08905	+
O54946	DnaJ homolog subfamily B member 6	Dnajb6	1.13544	NA	1.04115	0.027563	0.057247	1.08829	+
F6RPJ9	Insulin-degrading enzyme	Ide	1.08199	1.05859	1.12263	0.000296	0.009029	1.08774	+
Q8VEE4	Replication protein A 70 kDa DNA-binding subunit;Replication protein A 70 kDa DNA-binding subunit, N-terminally processed	Rpa1	1.06074	1.1273	1.06757	0.000379	0.009029	1.08521	+
Q9Z1F9	SUMO-activating enzyme subunit 2	Uba2	1.11854	1.14771	0.986988	0.002072	0.013505	1.08441	+
E9QP19	E3 ubiquitin-protein ligase TRIM33	Trim33	1.01421	1.13737	1.09792	0.001122	0.01108	1.08317	+
Q9JIK5	Nucleolar RNA helicase 2	Ddx21	1.14877	1.20484	0.892775	0.007786	0.025442	1.08213	+
O35685	Nuclear migration protein nudC	Nudc	1.06342	1.02514	1.15013	0.001171	0.011123	1.07956	+
Q91VU7		Pus7	1.11359	1.26419	0.859317	0.011778	0.032814	1.07903	+
Q9EST4	Proteasome assembly chaperone 2	Psmg2	1.03928	NA	1.11486	0.022326	0.049554	1.07707	+
P97376	Protein FRG1	Frg1	1.09943	NA	1.05257	0.01386	0.036343	1.076	+
Q6PCM1	Lysine-specific demethylase 3A	Kdm3a	1.03604	0.942204	1.24419	0.00683	0.023576	1.07414	+
Q9WVL3	Solute carrier family 12 member 7	Slc12a7	1.11319	1.11699	0.991435	0.001471	0.011992	1.07387	+
Q9JK23	Proteasome assembly chaperone 1	Psmg1	1.02237	NA	1.12078	0.029214	0.05953	1.07157	+
P97855	Ras GTPase-activating protein-binding protein 1	G3bp1	1.13632	1.24043	0.832412	0.012841	0.034717	1.06972	+
P54822	Adenylosuccinate lyase	Adsl	1.00493	1.12871	1.07369	0.00112	0.01108	1.06911	+
A2APB8	Targeting protein for Xklp2	Tpx2	1.10243	1.09569	0.982916	0.001334	0.011647	1.06035	+
Q99J95	Cyclin-dependent kinase 9	Cdk9	1.19975	0.870561	1.10472	0.008434	0.026822	1.05834	+
E9PWG6		Ncapg	1.10911	1.02439	1.03741	0.00062	0.009362	1.05697	+
Q9DBB4	N-alpha-acetyltransferase 16, NatA auxiliary subunit	Naa16	1.13554	0.977026	1.05571	0.001872	0.013086	1.05609	+
Q8BR90	UPF0600 protein C5orf51 homolog		1.12976	1.10714	0.931222	0.003512	0.016643	1.05604	+
Q8K4L0	ATP-dependent RNA helicase DDX54	Ddx54	1.071	0.961544	1.13063	0.002198	0.013801	1.05439	+
Q9DD18	D-tyrosyl-tRNA(Tyr) deacylase 1	Dtd1	1.05827	NA	1.04896	0.002814	0.014938	1.05361	+
Q60864	Stress-induced-phosphoprotein 1	Stip1	1.02974	1.03557	1.09487	0.00039	0.009029	1.0534	+
P17182	Alpha-enolase	Eno1	0.992143	1.08597	1.07342	0.000783	0.009991	1.05051	+
P34884	Macrophage migration inhibitory factor	Mif	1.08847	1.01787	1.04496	0.000383	0.009029	1.05043	+
Q99L45	Eukaryotic translation initiation factor 2 subunit 2	Eif2s2	1.0473	0.959079	1.14337	0.002559	0.014442	1.04992	+
P24472	Glutathione S-transferase A4	Gsta4	1.22468	0.6891	1.23574	0.02828	0.058235	1.04984	+
A2A791	Zinc finger MYM-type protein 4	Zmym4	0.900587	1.13239	1.1153	0.005013	0.019993	1.04943	+
Q9D287	Pre-mRNA-splicing factor SPF27	Bcas2	1.07671	NA	1.01764	0.01795	0.042606	1.04717	+
Q78JE5	F-box only protein 22	Fbxo22	1.1115	1.00301	1.02067	0.001033	0.010729	1.04506	+
A2AFQ0	E3 ubiquitin-protein ligase HUWE1	Huwe1	1.35005	1.14459	0.637964	0.038697	0.071795	1.0442	+
Q3TE40	Replication protein A 32 kDa subunit	Rpa2	1.03824	NA	1.04924	0.003354	0.016282	1.04374	+
Q00612	Glucose-6-phosphate 1-dehydrogenase X;Glucose-6-phosphate 1-dehydrogenase	G6pdx	1.0447	0.981405	1.10133	0.001102	0.011031	1.04248	+
Q61211	Eukaryotic translation initiation factor 2D	Eif2d	0.888926	0.769743	1.4683	0.040274	0.073887	1.04232	+
Q9QXX4	Calcium-binding mitochondrial carrier protein Aralar2	Slc25a13	0.794804	0.981308	1.34674	0.023401	0.051357	1.04095	+
F8WJ40	Histone-lysine N-methyltransferase;Histone-lysine N-methyltransferase 2B	Kmt2b	0.994946	1.08081	NA	0.026317	0.055443	1.03788	+
P97930	Thymidylate kinase	Dtymk	1.04678	NA	1.02718	0.006016	0.022083	1.03698	+
Q921M7	Protein FAM49B	Fam49b	1.00257	1.05896	1.03066	0.000249	0.008733	1.03073	+
O54984	ATPase Asna1	Asna1	1.03394	0.944	1.11273	0.002231	0.013894	1.03022	+
Q61584	Fragile X mental retardation syndrome-related protein 1	Fxr1	1.10403	1.12888	0.849872	0.007443	0.024813	1.0276	+
E9Q852		Mllt4	0.929841	1.01616	1.13168	0.003233	0.015919	1.02589	+
Q99LZ3	DNA replication complex GINS protein SLD5;DNA replication complex GINS protein SLD5, N-terminally processed	Gins4	1.00343	NA	1.0471	0.013556	0.035865	1.02527	+
Q8BIX3	ARL14 effector protein	Arl14ep	1.08432	NA	0.965628	0.03682	0.069412	1.02497	+
Q9CZ15	DNA replication complex GINS protein PSF1	Gins1	0.999463	NA	1.04979	0.015632	0.039238	1.02463	+
D3Z684	Gem-associated protein 7	Gemin7	1.04064	1.12079	0.911667	0.003517	0.016643	1.02437	+
D3Z7L2		Mllt4	1.09943	0.94659	NA	0.047467	0.083429	1.02301	+
Q3TRM4	Neuropathy target esterase	Pnpla6	0.984243	0.963316	1.11645	0.002196	0.013801	1.02134	+
Q9CY62	E3 ubiquitin-protein ligase RNF181	Rnf181	1.13143	0.991283	0.937548	0.003194	0.015919	1.02009	+
Q80TE0	RNA polymerase II-associated protein 1	Rpap1	1.0373	1.04425	0.977858	0.000426	0.009029	1.0198	+
Q9DCH2	Ribonuclease P protein subunit p20	Pop7	1.17172	0.857808	1.02502	0.007839	0.025564	1.01818	+
Q3U2G2	Heat shock 70 kDa protein 4	Hspa4	1.00311	1.03126	1.00641	7.7e-05	0.008336	1.01359	+
Q8K2Z4	Condensin complex subunit 1	Ncapd2	1.06629	0.981794	0.992689	0.000685	0.009561	1.01359	+
Q3TV70	Nuclear receptor 2C2-associated protein	Nr2c2ap	0.9943	1.0208	1.0236	8.5e-05	0.008336	1.0129	+
Q99NG0	Helicase ARIP4	Rad54l2	1.03604	1.11761	0.876979	0.004856	0.019654	1.01021	+
Q9ESJ0	Exportin-4	Xpo4	1.0269	1.00368	0.99683	8.1e-05	0.008336	1.00914	+
Q6A068	Cell division cycle 5-like protein	Cdc5l	1.00161	1.20442	0.820074	0.011896	0.032919	1.0087	+
Q8VI33	Transcription initiation factor TFIID subunit 9	Taf9	1.01707	NA	0.997984	0.006031	0.022098	1.00753	+
Q9CU65	Zinc finger MYM-type protein 2	Zmym2	1.02564	0.992537	1.00173	9.6e-05	0.008398	1.00663	+
A1BN54		Actn1	0.995162	1.11043	0.903073	0.003558	0.016714	1.00289	+
Q80T06	Elongation factor 1-delta	Eef1d	0.991711	0.960755	1.04933	0.000672	0.009561	1.0006	+
Q9CQP3	Coiled-coil-helix-coiled-coil-helix domain-containing protein 5	Chchd5	1.076	0.951658	0.969945	0.001501	0.012034	0.9992	+
P60122	RuvB-like 1	Ruvbl1	1.03614	1.02834	0.92709	0.001238	0.011405	0.997193	+
P14901	Heme oxygenase 1	Hmox1	1.0269	NA	0.966119	0.01941	0.044803	0.996511	+
Q3THS6	S-adenosylmethionine synthase isoform type-2	Mat2a	0.987387	0.973513	1.0286	0.000275	0.009029	0.996498	+
Q6P9L6	Kinesin-like protein KIF15	Kif15	1.0268	0.942204	1.01461	0.000704	0.009631	0.994536	+
Q99M28	RNA-binding protein with serine-rich domain 1	Rnps1;Gm9825	1.1108	1.06997	0.793416	0.00996	0.029729	0.991397	+
Q8VEK3	Heterogeneous nuclear ribonucleoprotein U	Hnrnpu;Gm28062	1.06465	1.31335	0.584451	0.043865	0.078706	0.987482	+
F8WHW3	Type 1 phosphatidylinositol 4,5-bisphosphate 4-phosphatase	Tmem55b	1.01962	1.03482	0.905431	0.001708	0.012542	0.986622	+
Q9CXF4	TBC1 domain family member 15	Tbc1d15	1.17039	0.629085	1.1597	0.031282	0.06205	0.986391	+
Q99P88	Nuclear pore complex protein Nup155	Nup155	0.984569	1.01938	0.953788	0.000369	0.009029	0.985912	+
Q8R5L1	Complement component 1 Q subcomponent-binding protein, mitochondrial	C1qbp	0.957962	NA	1.0089	0.016482	0.040432	0.983429	+
Q3UA06	Pachytene checkpoint protein 2 homolog	Trip13	0.958735	0.884865	1.10195	0.004186	0.018198	0.981851	+
E9Q634	Unconventional myosin-Ie	Myo1e	0.908042	1.0274	1.00555	0.001398	0.011878	0.980333	+
Q924Z6	Exportin-6	Xpo6	0.85657	1.19482	0.889257	0.011861	0.032868	0.980214	+
Q9D142	Uridine diphosphate glucose pyrophosphatase	Nudt14	0.990847	NA	0.968769	0.007172	0.024167	0.979808	+
Q8R3Q6	Coiled-coil domain-containing protein 58	Ccdc58	1.05806	0.739151	1.14155	0.015307	0.038707	0.979587	+
Q8K370	Acyl-CoA dehydrogenase family member 10	Acad10	0.901507	1.0608	0.964055	0.002249	0.013943	0.975455	+
Q3UEB3	Poly(U)-binding-splicing factor PUF60	Puf60	0.999248	0.984802	0.94105	0.000322	0.009029	0.975034	+
Q9DBG5	Perilipin-3	Plin3	0.928376	0.997158	0.987763	0.000491	0.009072	0.971099	+
Q9JMH6	Thioredoxin reductase 1, cytoplasmic	Txnrd1	0.961494	0.923714	1.02388	0.000906	0.010036	0.969697	+
Q9Z1N5	Spliceosome RNA helicase Ddx39b	Ddx39b	1.01516	1.12818	0.761624	0.012296	0.033709	0.968322	+
O88986	2-amino-3-ketobutyrate coenzyme A ligase, mitochondrial	Gcat	1.01665	0.909281	0.975713	0.001045	0.010771	0.967214	+
Q9Z0W3	Nuclear pore complex protein Nup160	Nup160	1.00781	0.982474	0.90891	0.000941	0.010108	0.9664	+
Q8CHP5	Partner of Y14 and mago	Wibg	1.02395	NA	0.908808	0.037881	0.070798	0.966379	+
Q9Z2V5	Histone deacetylase 6	Hdac6	0.974772	0.962036	0.958041	2.7e-05	0.006528	0.96495	+
Q99LB6	Methionine adenosyltransferase 2 subunit beta	Mat2b	1.13163	1.13789	0.619347	0.030391	0.06099	0.962955	+
Q8VBV3	Exosome complex component RRP4	Exosc2	0.983592	NA	0.94125	0.014002	0.036531	0.962421	+
Q99LX0	Protein deglycase DJ-1	Park7	0.825048	1.25047	0.805105	0.022124	0.049287	0.960207	+
Q3TYX3	SET and MYND domain-containing protein 5	Smyd5	0.88881	0.943202	1.04757	0.002347	0.013998	0.959859	+
P08775	DNA-directed RNA polymerase II subunit RPB1	Polr2a	1.01272	1.14857	0.715623	0.017311	0.041693	0.958971	+
Q8BIW1	Protein prune homolog	Prune	1.00182	0.790966	1.08305	0.008144	0.026119	0.958614	+
D3Z030	Leucine-rich repeat-containing protein 16A	Lrrc16a	0.935801	0.937102	0.997119	0.000447	0.009029	0.956674	+
Q9CPY7	Cytosol aminopeptidase	Lap3	0.953867	0.907952	1.00699	0.000894	0.010036	0.956269	+
Q9ERF3	WD repeat-containing protein 61;WD repeat-containing protein 61, N-terminally processed	Wdr61	0.928714	0.885073	1.05479	0.00282	0.014951	0.956192	+
Q62376	U1 small nuclear ribonucleoprotein 70 kDa	Snrnp70	0.978807	1.29266	0.596938	0.041525	0.07534	0.956136	+
Q9R207	Nibrin	Nbn	1.08543	0.851442	0.930014	0.005136	0.020229	0.95563	+
Q00422	GA-binding protein alpha chain	Gabpa	0.678501	1.21653	0.963858	0.025579	0.054506	0.952962	+
Q60737	Casein kinase II subunit alpha	Csnk2a1	0.896211	0.97234	0.989213	0.000901	0.010036	0.952588	+
Q62384	Zinc finger protein ZPR1	Zpr1	0.816785	1.04499	0.995483	0.005254	0.020435	0.95242	+
Q9WV84	Nucleoside diphosphate kinase, mitochondrial	Nme4	1.07742	0.753561	1.02624	0.010956	0.031596	0.952408	+
Q9CQN1	Heat shock protein 75 kDa, mitochondrial	Trap1	0.91489	0.992055	0.942349	0.000565	0.009157	0.949765	+
Q9CRT8	Exportin-T	Xpot	0.964687	1.07508	0.809382	0.00652	0.023069	0.949716	+
P11157	Ribonucleoside-diphosphate reductase subunit M2	Rrm2	0.925553	0.848035	1.07424	0.004853	0.019654	0.949276	+
Q9CY45	Protein-lysine N-methyltransferase N6amt2	N6amt2	0.960502	NA	0.936846	0.007937	0.025688	0.948674	+
P12970	60S ribosomal protein L7a	Rpl7a;Gm4978	0.780503	1.17439	0.885834	0.01511	0.038421	0.946909	+
Q8BH74	Nuclear pore complex protein Nup107	Nup107	0.948093	0.976441	0.916149	0.000338	0.009029	0.946894	+
Q3TUQ5	Pinin	Pnn	0.975863	1.22344	0.640059	0.030453	0.061055	0.946456	+
Q9JHK4	Geranylgeranyl transferase type-2 subunit alpha	Rabggta	0.792822	0.886007	1.15927	0.013242	0.03544	0.946032	+
Q9DBH0	NEDD4-like E3 ubiquitin-protein ligase WWP2	Wwp2	0.913979	0.940005	0.983887	0.000465	0.009038	0.945957	+
G3X9Z4		Pcf11	0.914548	1.04322	0.876666	0.002834	0.01497	0.944812	+
Q9Z2N8	Actin-like protein 6A	Actl6a	1.03279	0.970677	0.830902	0.003969	0.017861	0.94479	+
Q99MN1	Lysine--tRNA ligase	Kars	0.924309	0.942803	0.965333	0.000158	0.008573	0.944148	+
Q9D1A2	Cytosolic non-specific dipeptidase	Cndp2	1.0472	0.747517	1.0331	0.010558	0.03084	0.942606	+
Q8C156	Condensin complex subunit 2	Ncaph	0.960502	0.992923	0.87206	0.001467	0.011992	0.941828	+
Q9ER72	Cysteine--tRNA ligase, cytoplasmic	Cars	0.948093	1.04564	0.831118	0.004309	0.018441	0.941617	+
Q3TWW8	Serine/arginine-rich splicing factor 6	Srsf6	1.05176	1.0172	0.755612	0.009716	0.02917	0.941526	+
Q9CYI4	Putative RNA-binding protein Luc7-like 1	Luc7l	1.14528	1.05195	0.618222	0.028657	0.058628	0.938483	+
Q91Z50	Flap endonuclease 1	Fen1	1.00225	0.885384	0.922339	0.001353	0.011716	0.936658	+
Q9WTM5	RuvB-like 2	Ruvbl2	0.945866	0.919561	0.942249	7.7e-05	0.008336	0.935892	+
Q9D8U8	Sorting nexin-5	Snx5	0.860595	0.77008	1.17201	0.016557	0.040592	0.93423	+
Q60973	Histone-binding protein RBBP7	Rbbp7	0.858466	0.998983	0.943447	0.00191	0.013184	0.933632	+
Q8CG47	Structural maintenance of chromosomes protein 4;Structural maintenance of chromosomes protein	Smc4	0.988577	0.91224	0.897521	0.000914	0.010057	0.932779	+
Q9CZU3	Superkiller viralicidic activity 2-like 2	Skiv2l2	0.938716	0.961051	0.895563	0.000425	0.009029	0.931777	+
G5E8R8	UBX domain-containing protein 7	Ubxn7	0.955307	0.841733	0.9896	0.002306	0.013943	0.92888	+
E9QLZ9	Protein enabled homolog	Enah	1.03709	1.02156	0.72587	0.011691	0.03264	0.928171	+
Q8R0G9	Nuclear pore complex protein Nup133	Nup133	0.892052	0.939905	0.946338	0.000342	0.009029	0.926099	+
Q8CE96	tRNA (adenine(58)-N(1))-methyltransferase non-catalytic subunit TRM6	Trmt6	1.06854	1.05472	0.652077	0.021108	0.047623	0.925114	+
A3KG93	Lysine-specific histone demethylase 1A	Kdm1a	0.983701	0.913768	0.877606	0.001131	0.01108	0.925025	+
Q9R1T2	SUMO-activating enzyme subunit 1;SUMO-activating enzyme subunit 1, N-terminally processed	Sae1	0.969738	1.01758	0.786201	0.005768	0.02151	0.924507	+
Q9Z2X1	Heterogeneous nuclear ribonucleoprotein F;Heterogeneous nuclear ribonucleoprotein F, N-terminally processed	Hnrnpf	0.973351	1.0208	0.775367	0.006563	0.023141	0.923173	+
E9Q175	Unconventional myosin-VI	Myo6	1.08917	0.701304	0.97063	0.015192	0.038463	0.920369	+
Q9WVK4	EH domain-containing protein 1	Ehd1	0.971929	0.86404	0.917572	0.001149	0.011086	0.917847	+
A2A654		Bptf	0.919664	0.913972	NA	0.001976	0.013361	0.916818	+
Q99KR3	Beta-lactamase-like protein 2	Lactb2	0.888578	NA	0.944843	0.019531	0.045006	0.916711	+
A2A547	Ribosomal protein L19;60S ribosomal protein L19	Rpl19	0.737888	1.10562	0.89958	0.013275	0.035444	0.914364	+
Q3UH60	Disco-interacting protein 2 homolog B	Dip2b	1.02458	0.874333	0.839829	0.003837	0.017479	0.912915	+
G3X956	FACT complex subunit SPT16	Supt16;Supt16h	1.12495	0.82038	0.787981	0.013595	0.035909	0.911103	+
O09106	Histone deacetylase 1;Histone deacetylase	Hdac1;Gm10093	1.02585	0.955422	0.742711	0.008671	0.027206	0.907994	+
Q8BTW3	Exosome complex component MTR3	Exosc6	0.863194	NA	0.9524	0.031254	0.062024	0.907797	+
P11440	Cyclin-dependent kinase 1	Cdk1	1.1564	0.509788	1.05654	0.0457	0.081191	0.907576	+
Q921I9	Exosome complex component RRP41	Exosc4	0.867201	NA	0.946836	0.027929	0.057715	0.907018	+
B2RQC6	CAD protein;Glutamine-dependent carbamoyl-phosphate synthase;Aspartate carbamoyltransferase;Dihydroorotase	Cad	0.811413	0.771654	1.13771	0.015959	0.03969	0.906927	+
Q8C6B9	Active regulator of SIRT1	Rps19bp1	0.989335	0.784632	0.946139	0.004687	0.019236	0.906702	+
Q8VDD5	Myosin-9	Myh9	0.754271	0.807503	1.15755	0.018922	0.044138	0.906441	+
P19253	60S ribosomal protein L13a	Rpl13a	0.833626	0.953046	0.930517	0.001632	0.012455	0.90573	+
Q6PFB2	Regulator of chromosome condensation	Rcc1	0.929165	0.963709	0.8204	0.002272	0.013943	0.904425	+
D3YTR4		Mbd3	0.837235	NA	0.968867	0.046316	0.082108	0.903051	+
Q9JLQ0	CD2-associated protein	Cd2ap	0.942631	0.757879	1.00297	0.006627	0.023209	0.90116	+
D3Z0M9		Ddx23	0.903689	0.945993	0.849659	0.000959	0.010229	0.89978	+
Q8C1A5	Thimet oligopeptidase	Thop1	0.878338	0.946192	0.86586	0.000774	0.009991	0.896797	+
Q9EPU0	Regulator of nonsense transcripts 1	Upf1	0.872604	0.956807	0.859846	0.001149	0.011086	0.896419	+
Q5SSW2	Proteasome activator complex subunit 4	Psme4	0.936138	0.871085	0.881882	0.000504	0.009072	0.896368	+
Q9WVB0	RNA-binding protein with multiple splicing	Rbpms	0.863902	NA	0.927392	0.022555	0.050008	0.895647	+
F6UHR6	Oxysterol-binding protein;Oxysterol-binding protein-related protein 9	Osbpl9	0.699804	0.753561	1.23239	0.033945	0.065896	0.895252	+
O55201	Transcription elongation factor SPT5	Supt5h	0.861305	0.933089	0.883339	0.000565	0.009157	0.892577	+
Q9DAW6	U4/U6 small nuclear ribonucleoprotein Prp4	Prpf4	0.944751	0.945794	0.786758	0.003487	0.016631	0.892434	+
Z4YJT3	La-related protein 1	Larp1	0.824321	1.0054	0.846354	0.004064	0.017936	0.892025	+
P61025	Cyclin-dependent kinases regulatory subunit 1;Cyclin-dependent kinases regulatory subunit	Cks1b;Cks1brt	1.003	0.65405	1.01156	0.017081	0.04138	0.889539	+
Q6P2B1	Transportin-3	Tnpo3	0.892284	0.92432	0.849446	0.000595	0.009182	0.888683	+
Q6PFD9	Nuclear pore complex protein Nup98-Nup96;Nuclear pore complex protein Nup98;Nuclear pore complex protein Nup96	Nup98	0.881604	0.916312	0.862065	0.00032	0.009029	0.88666	+
Q8CFI7	DNA-directed RNA polymerase II subunit RPB2	Polr2b	0.878104	1.00521	0.77447	0.005625	0.021196	0.885928	+
J3QNK5	Histone deacetylase complex subunit SAP130	Sap130	0.968751	1.10856	0.579322	0.030516	0.061151	0.885546	+
Q8CG48	Structural maintenance of chromosomes protein 2	Smc2	0.931306	0.897073	0.823114	0.001302	0.0116	0.883831	+
Q61699	Heat shock protein 105 kDa	Hsph1	0.8902	0.879348	0.881882	1.4e-05	0.006528	0.88381	+
Q3U1J4	DNA damage-binding protein 1	Ddb1	0.892052	0.848994	0.907888	0.000397	0.009029	0.882978	+
B9EJR8	Dynein assembly factor 5, axonemal	Dnaaf5	0.904836	0.991862	0.740416	0.006961	0.023792	0.879038	+
Q8R3C0	Mini-chromosome maintenance complex-binding protein	Mcmbp	0.891011	0.810569	0.933936	0.00169	0.01251	0.878505	+
Q07076	Annexin A7	Anxa7	0.692384	1.01464	0.928199	0.011807	0.032837	0.878408	+
Q07813	Apoptosis regulator BAX	Bax	1.04053	0.692665	0.901019	0.012993	0.035011	0.878073	+
Q8VCH6	Delta(24)-sterol reductase	Dhcr24	1.06987	0.805309	0.75402	0.01224	0.033624	0.876401	+
P61759	Prefoldin subunit 3	Vbp1	0.817272	NA	0.935342	0.042823	0.077285	0.876307	+
F6R9G0		Ep400	0.848367	0.903343	NA	0.019974	0.045665	0.875855	+
Q60872	Eukaryotic translation initiation factor 1A	Eif1a	1.03489	0.595451	0.997215	0.024822	0.05339	0.875851	+
P29341	Polyadenylate-binding protein 1	Pabpc1	0.898401	0.941604	0.78609	0.002792	0.014901	0.875365	+
Q80UV9	Transcription initiation factor TFIID subunit 1	Taf1	0.853722	0.895939	NA	0.015358	0.038787	0.874831	+
B2RXC6	DNA-directed RNA polymerase	Polr3a	0.915801	0.946988	0.760265	0.004334	0.018489	0.874351	+
Q6PCM2	Integrator complex subunit 6	Ints6	0.934566	0.886941	0.797176	0.002122	0.013729	0.872895	+
E9Q6J5		Bod1l	0.920912	0.820924	NA	0.036504	0.069071	0.870918	+
Q99KP6	Pre-mRNA-processing factor 19	Prpf19	0.946312	1.00377	0.660357	0.014571	0.037468	0.870148	+
Q8CCF0	U4/U6 small nuclear ribonucleoprotein Prp31	Prpf31	0.744182	0.625607	1.23924	0.043658	0.078412	0.869675	+
P40142	Transketolase	Tkt	0.846935	0.862775	0.897624	0.000297	0.009029	0.869111	+
Q6WKZ8	E3 ubiquitin-protein ligase UBR2	Ubr2	0.819342	0.986159	0.800926	0.004567	0.018932	0.868809	+
E9PV45	Ubiquitin carboxyl-terminal hydrolase;Ubiquitin carboxyl-terminal hydrolase 24	Usp24	0.871783	0.863408	NA	0.003073	0.015627	0.867595	+
Q9D1R2	Protein KTI12 homolog	Kti12	NA	0.895217	0.836716	0.021496	0.048259	0.865967	+
Q7TSH3	Zinc finger protein 516	Znf516	0.788479	0.85802	0.949223	0.002881	0.01512	0.865241	+
Q8K4P0	pre-mRNA 3 end processing protein WDR33	Wdr33	0.842512	0.968816	0.781632	0.004043	0.01788	0.86432	+
P50580	Proliferation-associated protein 2G4	Pa2g4	0.780378	0.981503	0.830902	0.00485	0.019654	0.864261	+
E9PZY8	Protein virilizer homolog	1110037F02Rik;Kiaa1429	1.00086	1.06494	0.526612	0.036498	0.069071	0.864136	+
P62320	Small nuclear ribonucleoprotein Sm D3	Snrpd3	0.950761	0.947685	0.693485	0.009596	0.028995	0.863977	+
O08579	Emerin	Emd	0.910785	0.77143	0.90799	0.002826	0.014963	0.863402	+
Q5SW15	Methyltransferase-like protein;Methyltransferase-like protein 16	Mettl16	0.837476	0.962233	0.78442	0.003723	0.017128	0.861376	+
H3BIW0	Zinc finger CCCH domain-containing protein 18	Zc3h18	0.949539	0.892223	0.737771	0.005366	0.020664	0.859844	+
P62315	Small nuclear ribonucleoprotein Sm D1	Snrpd1	0.904147	1.09892	0.572499	0.030576	0.061212	0.858523	+
Q9D1L0	Coiled-coil-helix-coiled-coil-helix domain-containing protein 2	Chchd2;Zbed5	0.954975	0.681942	0.935844	0.010365	0.030472	0.857587	+
P62309	Small nuclear ribonucleoprotein G	Snrpg	0.913979	0.99456	0.662541	0.013339	0.035526	0.857027	+
Q8R4R6	Nucleoporin NUP53	Nup35	0.677428	0.968423	0.920312	0.010903	0.031513	0.855388	+
Q9DBJ1	Phosphoglycerate mutase 1	Pgam1	0.787111	0.971655	0.805105	0.004692	0.019236	0.854624	+
Q9CZD3	Glycine--tRNA ligase	Gars	0.876936	1.04052	0.644854	0.017587	0.042013	0.854103	+
G5E870	E3 ubiquitin-protein ligase TRIP12	Trip12	0.829887	0.602923	1.12395	0.02992	0.06037	0.852255	+
P62717	60S ribosomal protein L18a	Rpl18a	0.776874	0.820815	0.954184	0.003905	0.017688	0.850624	+
D3Z5P5	DNA-binding protein SMUBP-2	Ighmbp2	0.846577	0.859289	0.845927	2.6e-05	0.006528	0.850598	+
Q61739	Integrin alpha-6;Integrin alpha-6 heavy chain;Integrin alpha-6 light chain	Itga6	0.865788	0.963414	0.722385	0.006705	0.023253	0.850529	+
Q9EPU4	Cleavage and polyadenylation specificity factor subunit 1	Cpsf1	0.857281	0.888497	0.805764	0.000803	0.010036	0.850514	+
Q8CJG0	Protein argonaute-2	Ago2	0.812024	1.00607	0.732699	0.008997	0.027754	0.850264	+
Q8BP47	Asparagine--tRNA ligase, cytoplasmic	Nars	0.800977	1.02203	0.723315	0.010932	0.031552	0.848774	+
E9PUF7	Rho guanine nucleotide exchange factor 1	Arhgef1	0.789721	0.876947	0.879067	0.001201	0.011305	0.848579	+
P97429	Annexin A4;Annexin	Anxa4	0.788852	1.05777	0.697396	0.015879	0.039614	0.848004	+
Q99J09	Methylosome protein 50	Wdr77	0.889042	0.945096	0.70789	0.007061	0.023928	0.847343	+
P14115	60S ribosomal protein L27a	Rpl27a	0.798758	0.894908	0.84518	0.001074	0.010911	0.846282	+
P62305	Small nuclear ribonucleoprotein E	Snrpe	0.867554	1.03828	0.632281	0.018808	0.043987	0.846038	+
Q9WUU9	Germinal-center associated nuclear protein	Mcm3ap	0.635758	0.822877	1.07715	0.022142	0.049287	0.845263	+
D3Z4V1	Pleiotropic regulator 1	Plrg1	0.81288	1.10545	0.610953	0.027786	0.057492	0.843093	+
P67984	60S ribosomal protein L22	Rpl22	1.01463	0.719711	0.793859	0.010867	0.031429	0.842734	+
Q8BHK9	DNA excision repair protein ERCC-6-like	Ercc6l	0.877871	0.836693	0.812008	0.00052	0.009157	0.842191	+
Q9Z1X4	Interleukin enhancer-binding factor 3	Ilf3	0.876819	1.14849	0.491145	0.047998	0.084002	0.838817	+
Q9ES00	Ubiquitin conjugation factor E4 B	Ube4b	0.831336	0.827425	0.856034	0.000114	0.008573	0.838265	+
Q62189	U1 small nuclear ribonucleoprotein A	Snrpa;Gm5145	0.926005	1.07107	0.514976	0.037354	0.070061	0.837349	+
Q8BGJ5	Polypyrimidine tract-binding protein 1	Ptbp1	0.859531	1.05906	0.589051	0.025535	0.054439	0.835879	+
P27048	Small nuclear ribonucleoprotein-associated protein B	Snrpb	0.889274	0.785411	0.829931	0.001296	0.0116	0.834872	+
E9QAZ2	Ribosomal protein L15;60S ribosomal protein L15	Gm10020;Rpl15	0.852415	0.9438	0.70789	0.006701	0.023253	0.834702	+
D3Z3C1	Fas apoptotic inhibitory molecule 1	Faim;Gm6432	0.837115	NA	0.828743	0.003199	0.015919	0.832929	+
P23591	GDP-L-fucose synthase	Tsta3	0.76568	0.762975	0.969847	0.006699	0.023253	0.832834	+
Q9D0D5	General transcription factor IIE subunit 1	Gtf2e1	0.817029	0.931178	0.747405	0.004121	0.01803	0.831871	+
Q8WTY4	Anamorsin	Ciapin1	0.776623	0.863197	0.854868	0.001098	0.011031	0.831563	+
P12382	ATP-dependent 6-phosphofructokinase, liver type	Pfkl	0.833987	0.761278	0.890706	0.002037	0.013462	0.828657	+
Q3THK3	General transcription factor IIF subunit 1	Gtf2f1	0.827712	0.780728	0.867754	0.000927	0.010065	0.825398	+
E9QB02	Methionine--tRNA ligase, cytoplasmic	Mars	0.813613	0.899852	0.759698	0.002442	0.014148	0.824388	+
P47857	ATP-dependent 6-phosphofructokinase, muscle type	Pfkm	0.771728	0.813083	0.879067	0.001445	0.011992	0.821293	+
P47968	Ribose-5-phosphate isomerase	Rpia	0.831336	NA	0.810258	0.008174	0.026186	0.820797	+
Q8R2U0	Nucleoporin SEH1	Seh1l	0.893555	0.86404	0.700469	0.005329	0.020597	0.819355	+
Q3TUU5	Testis-expressed sequence 30 protein	Tex30	0.832421	NA	0.804226	0.010966	0.031604	0.818324	+
Q921Y2	U3 small nucleolar ribonucleoprotein protein IMP3	Imp3	0.991387	0.465179	0.998368	0.043544	0.078241	0.818312	+
B1AUN3		Eif2b3	0.970724	0.667278	0.811461	0.011324	0.032096	0.816488	+
O55142	60S ribosomal protein L35a	Rpl35a	0.83037	0.861086	0.749119	0.001681	0.01251	0.813525	+
Q9QXK7	Cleavage and polyadenylation specificity factor subunit 3	Cpsf3	0.896557	0.832928	0.704714	0.0048	0.019522	0.8114	+
P47963	60S ribosomal protein L13	Rpl13	0.813002	0.654537	0.961593	0.011777	0.032814	0.809711	+
P61406	Telomerase-binding protein EST1A	Smg6	0.771979	0.770755	0.883963	0.002146	0.013801	0.808899	+
Q6ZQH8	Nucleoporin NUP188 homolog	Nup188	0.797276	0.84002	0.783863	0.00044	0.009029	0.807053	+
Q8BIP0	Aspartate--tRNA ligase, mitochondrial	Dars2	0.682519	0.74248	0.99558	0.013844	0.036343	0.80686	+
O70579	Peroxisomal membrane protein PMP34	Slc25a17	0.78823	0.760826	0.870591	0.001668	0.012494	0.806549	+
P51432	1-phosphatidylinositol 4,5-bisphosphate phosphodiesterase beta-3	Plcb3	0.76669	0.844941	0.805764	0.000785	0.009991	0.805798	+
P50431	Serine hydroxymethyltransferase, cytosolic;Serine hydroxymethyltransferase	Shmt1	0.761254	0.659161	0.995098	0.01491	0.038148	0.805171	+
P61222	ATP-binding cassette sub-family E member 1	Abce1	0.842393	0.779276	0.792198	0.000572	0.009157	0.804622	+
P27659	60S ribosomal protein L3	Rpl3	0.775495	0.975758	0.659142	0.012986	0.035011	0.803465	+
A7TU71	Protein Shroom2	Shroom2	0.817881	0.82472	0.767498	0.000504	0.009072	0.803366	+
Q9WTX8	Mitotic spindle assembly checkpoint protein MAD1	Mad1l1	0.748661	0.725292	0.936144	0.006829	0.023576	0.803366	+
P62889	60S ribosomal protein L30	Rpl30	0.92397	0.74053	0.740186	0.00578	0.02151	0.801562	+
Q923G2	DNA-directed RNA polymerases I, II, and III subunit RPABC3	Polr2h	0.985111	0.549655	0.867754	0.025384	0.054258	0.80084	+
A8C756	Thyroid adenoma-associated protein homolog	Thada	0.815932	0.811116	0.774806	0.000263	0.008805	0.800618	+
Q8R1L4	ER lumen protein-retaining receptor 3	Kdelr3	0.934566	0.67523	0.783082	0.008776	0.027377	0.797626	+
Q9D8E6	60S ribosomal protein L4	Rpl4	0.790838	0.951856	0.64951	0.011786	0.032815	0.797402	+
Q91XI1	tRNA-dihydrouridine(47) synthase [NAD(P)(+)]-like	Dus3l	0.705871	0.75413	0.928199	0.007117	0.024079	0.796067	+
B1ASU9	Serine/threonine-protein kinase tousled-like 2	Tlk2	0.760114	0.828182	NA	0.027266	0.056831	0.794148	+
P14148	60S ribosomal protein L7	Rpl7	0.721968	0.831096	0.824632	0.001983	0.013361	0.792565	+
Q99MR1	PERQ amino acid-rich with GYF domain-containing protein 1	Gigyf1	0.727165	0.696932	0.952697	0.010214	0.030179	0.792265	+
Q62388	Serine-protein kinase ATM	Atm	0.79307	0.786968	NA	0.002458	0.014148	0.790019	+
P34152	Focal adhesion kinase 1	Ptk2	0.744438	0.881224	0.739037	0.003465	0.016563	0.788233	+
E9QKA4	Serine/arginine repetitive matrix protein 1	Srrm1	0.905638	0.935398	0.523145	0.027217	0.056789	0.78806	+
Q6ZQ03	Formin-binding protein 4	Fnbp4	0.645671	0.969893	0.748205	0.014427	0.037309	0.787923	+
Q9D1M4	Eukaryotic translation elongation factor 1 epsilon-1	Eef1e1	0.903918	0.560233	0.895769	0.020096	0.045844	0.78664	+
Q6PGC1	ATP-dependent RNA helicase Dhx29	Dhx29	0.892977	0.857702	0.608941	0.012669	0.034481	0.78654	+
P47911	60S ribosomal protein L6	Rpl6;Gm5428	0.784621	0.942403	0.63129	0.012803	0.034648	0.786105	+
P62307	Small nuclear ribonucleoprotein F	Snrpf	0.847293	0.967443	0.541456	0.025091	0.053912	0.785397	+
Q3UNN4	SWI/SNF complex subunit SMARCC1	Smarcc1	0.871549	0.626602	0.855928	0.010028	0.029821	0.784693	+
Q8BTT6	Digestive organ expansion factor homolog	Diexf	0.743926	0.88663	0.717725	0.004465	0.018815	0.78276	+
Q9CQT1	Methylthioribose-1-phosphate isomerase	Mri1	0.8152	0.788857	0.739496	0.000806	0.010036	0.781185	+
P47962	60S ribosomal protein L5	Rpl5	0.793318	0.949375	0.597446	0.016612	0.040614	0.780046	+
Q8VBT9	Tether containing UBX domain for GLUT4	Aspscr1	0.842033	0.783629	0.70836	0.002464	0.014148	0.778007	+
A8Y5G9	U7 snRNA-associated Sm-like protein LSm10	Lsm10	0.638794	0.929265	0.765467	0.011483	0.032313	0.777842	+
P35700	Peroxiredoxin-1	Prdx1	0.668541	0.795394	0.865439	0.005462	0.020887	0.776458	+
Q8BHL3	TBC1 domain family member 10B	Tbc1d10b	0.8692	0.822877	0.629926	0.008842	0.02747	0.774001	+
Q6KCD5	Nipped-B-like protein	Nipbl	0.749299	0.797162	NA	0.019697	0.045287	0.773231	+
Q9Z0V8	Mitochondrial import inner membrane translocase subunit Tim17-A	Timm17a	0.825896	0.526267	0.955075	0.026203	0.05529	0.76908	+
G3UXL2	Ribose-phosphate pyrophosphokinase 1	Prps1l3;Prps1	0.700068	0.800581	0.804995	0.001982	0.013361	0.768548	+
G3X934	WD repeat-containing protein 70	Wdr70	0.810556	0.654903	0.833489	0.005316	0.020597	0.766316	+
P62918	60S ribosomal protein L8	Rpl8	0.870962	0.499376	0.925171	0.029249	0.059555	0.765169	+
Q9ERK4	Exportin-2	Cse1l	0.782376	0.785967	0.724477	0.000679	0.009561	0.764273	+
O35435	Dihydroorotate dehydrogenase (quinone), mitochondrial	Dhodh	0.802086	0.664255	0.823114	0.004235	0.018332	0.763152	+
I7HLV2	60S ribosomal protein L10	Rpl10	0.770218	0.780617	0.735007	0.000328	0.009029	0.761947	+
P62827	GTP-binding nuclear protein Ran	Ran	0.770848	0.746717	0.762416	8.7e-05	0.008336	0.759993	+
Q9DCD2	Pre-mRNA-splicing factor SYF1	Xab2	0.724569	0.817662	0.73662	0.001477	0.011992	0.759617	+
Q61191	Host cell factor 1;HCF N-terminal chain 1;HCF N-terminal chain 2;HCF N-terminal chain 3;HCF N-terminal chain 4;HCF N-terminal chain 5;HCF N-terminal chain 6;HCF C-terminal chain 1;HCF C-terminal chain 2;HCF C-terminal chain 3;HCF C-terminal chain 4;HCF C-terminal chain 5;HCF C-terminal chain 6	Hcfc1	0.742772	0.801682	0.729115	0.000862	0.010036	0.757856	+
Q8BTS4	Nuclear pore complex protein Nup54	Nup54	0.786365	0.689338	0.79574	0.002012	0.013386	0.757147	+
O88532	Zinc finger RNA-binding protein	Zfr	0.653744	1.04136	0.574949	0.034425	0.066579	0.756684	+
Q6PE01	U5 small nuclear ribonucleoprotein 40 kDa protein	Snrnp40	0.766942	0.97234	0.530603	0.027291	0.056854	0.756629	+
Q6NV83	U2 snRNP-associated SURP motif-containing protein	U2surp	0.754526	0.795615	0.719707	0.00084	0.010036	0.756616	+
Q3UH70	Bromodomain-containing protein 4	Brd4	0.688659	0.869091	0.711293	0.005582	0.021096	0.756348	+
Q4FE56	Ubiquitin carboxyl-terminal hydrolase;Probable ubiquitin carboxyl-terminal hydrolase FAF-X	Usp9x	0.886838	0.892946	0.488822	0.029867	0.060293	0.756202	+
P56960	Exosome component 10	Exosc10	0.798635	0.814938	0.654273	0.00453	0.018873	0.755949	+
Q571I9	Aldehyde dehydrogenase family 16 member A1	Aldh16a1	0.709682	0.704251	0.852319	0.004093	0.017983	0.755417	+
Q9CQY2	RNMT-activating mini protein	Fam103a1;Gm10767	0.714269	0.667882	0.877501	0.007047	0.023923	0.753218	+
Q9D8S9	BolA-like protein 1	Bola1	0.791707	0.752195	0.711293	0.000952	0.010204	0.751731	+
Q99KR7	Peptidyl-prolyl cis-trans isomerase F, mitochondrial	Ppif	0.779002	0.617752	0.855398	0.008594	0.027067	0.750717	+
G3X8U8	Poly(ADP-ribose) glycohydrolase	Parg	0.647454	0.837123	0.766031	0.005394	0.020708	0.750203	+
Q5XJF6	Ribosomal protein;60S ribosomal protein L10a	Rpl10a	0.779127	NA	0.717491	0.026203	0.05529	0.748309	+
Q3TC46	Protein PAT1 homolog 1	Patl1	0.757449	0.712002	0.770988	0.00057	0.009157	0.746813	+
Q6P5E6	ADP-ribosylation factor-binding protein GGA2	Gga2	0.819099	0.712704	0.706479	0.002391	0.014056	0.746094	+
Q3UKJ7	WD40 repeat-containing protein SMU1;WD40 repeat-containing protein SMU1, N-terminally processed	Smu1	0.733634	0.746031	0.751173	4.9e-05	0.007836	0.743613	+
P10711	Transcription elongation factor A protein 1	Tcea1	0.690523	0.796389	0.743514	0.001685	0.01251	0.743475	+
Q8R4Y8	Rotatin	Rttn	0.721968	0.774125	0.733623	0.000452	0.009029	0.743239	+
P62274	40S ribosomal protein S29	Rps29	0.739689	0.872867	0.61384	0.010002	0.02979	0.742132	+
P33174	Chromosome-associated kinesin KIF4	Kif4	0.76568	0.62772	0.831873	0.006509	0.023069	0.741758	+
Q9CQR2	40S ribosomal protein S21	Rps21	0.763405	0.893256	0.56694	0.015985	0.03971	0.7412	+
P68040	Guanine nucleotide-binding protein subunit beta-2-like 1;Guanine nucleotide-binding protein subunit beta-2-like 1, N-terminally processed	Gnb2l1	0.745719	0.89697	0.578038	0.015132	0.03843	0.740242	+
G3UYV7	40S ribosomal protein S28	Rps28;Gm10263	0.773989	0.863197	0.578038	0.01276	0.034606	0.738408	+
Q8CIG8	Protein arginine N-methyltransferase 5	Prmt5	0.749427	0.851442	0.61133	0.008785	0.027377	0.7374	+
P27601	Guanine nucleotide-binding protein subunit alpha-13	Gna13	0.702049	0.845048	0.665084	0.005492	0.020906	0.737394	+
Q9CQF7	Prefoldin subunit 1	Pfdn1	0.754017	0.704958	0.749119	0.000449	0.009029	0.736031	+
F6ZDS4	Nucleoprotein TPR	Tpr	0.589143	0.743856	0.872793	0.012209	0.033561	0.735264	+
O08582	GTP-binding protein 1	Gtpbp1	0.696628	0.799368	0.707772	0.001957	0.013345	0.73459	+
Q9D0B6	Protein PBDC1	Pbdc1	0.736214	NA	0.731891	0.001875	0.013086	0.734052	+
Q6P5B5	Fragile X mental retardation syndrome-related protein 2	Fxr2	0.722098	0.877887	0.601499	0.011678	0.03264	0.733828	+
Q921M3	Splicing factor 3B subunit 3	Sf3b3	0.730921	0.839162	0.630174	0.006701	0.023253	0.733419	+
Q60865	Caprin-1	Caprin1	0.681181	0.967639	0.549869	0.027173	0.056752	0.732896	+
P14206	40S ribosomal protein SA	Rpsa	0.747894	0.853673	0.593381	0.010503	0.030722	0.731649	+
E9QAE3		Btaf1	0.745079	0.823961	0.623962	0.006271	0.022559	0.731001	+
Q6ZWX6	Eukaryotic translation initiation factor 2 subunit 1	Eif2s1	0.716361	0.791963	0.682646	0.001953	0.013334	0.730324	+
Q8BJ71	Nuclear pore complex protein Nup93	Nup93	0.749171	0.77143	0.667382	0.001876	0.013086	0.729328	+
P62242	40S ribosomal protein S8	Rps8	0.74136	0.858549	0.587519	0.011387	0.032194	0.729142	+
Q91WF7	Polyphosphoinositide phosphatase	Fig4	0.703631	0.72738	0.75584	0.000428	0.009029	0.72895	+
P70122	Ribosome maturation protein SBDS	Sbds	0.739818	NA	0.711293	0.012513	0.034174	0.725555	+
A2AQA7	Intron-binding protein aquarius	Aqr	0.749171	0.748545	0.669073	0.001353	0.011716	0.722263	+
Q8CEC0	Nuclear pore complex protein Nup88	Nup88	0.880205	0.779276	0.507166	0.022976	0.050642	0.722216	+
P51410	60S ribosomal protein L9	Rpl9	0.809577	0.632307	0.720522	0.005003	0.019971	0.720802	+
P97351	40S ribosomal protein S3a	Rps3a	0.736214	0.793735	0.630546	0.004374	0.018584	0.720165	+
Q9CR57	60S ribosomal protein L14	Rpl14	0.772859	0.454158	0.931926	0.036049	0.068524	0.719648	+
A2ATU0	Probable 2-oxoglutarate dehydrogenase E1 component DHKTD1, mitochondrial	Dhtkd1	0.806879	0.587557	0.763547	0.00858	0.027067	0.719328	+
Q9CQ48	NudC domain-containing protein 2	Nudcd2	0.775119	0.549131	0.825606	0.01378	0.036274	0.716619	+
Q80WW9	DDRGK domain-containing protein 1	Ddrgk1	0.73273	0.720061	0.695027	0.000239	0.008692	0.715939	+
Q7TPD0	Integrator complex subunit 3	Ints3	0.73286	0.696577	0.717024	0.000215	0.008687	0.715487	+
Q6A028	Switch-associated protein 70	Swap70	0.882419	0.756176	0.507706	0.022862	0.050499	0.715434	+
Q8BGS2	BolA-like protein 2	Bola2	0.735699	0.703191	0.704596	0.00022	0.008692	0.714495	+
O35841	Apoptosis inhibitor 5	Api5	0.672049	0.838947	0.622965	0.008339	0.026572	0.71132	+
Q9DB43	Zinc finger protein-like 1	Zfpl1	0.598388	0.649532	0.879276	0.014517	0.037411	0.709065	+
O08810	116 kDa U5 small nuclear ribonucleoprotein component	Eftud2	0.706529	0.871295	0.546457	0.017091	0.04138	0.708094	+
Q99NB8	Ubiquilin-4	Ubqln4	0.7085	0.76388	0.649021	0.002192	0.013801	0.707133	+
Q9DCG9	Multifunctional methyltransferase subunit TRM112-like protein	Trmt112	0.756179	0.641683	0.722734	0.002304	0.013943	0.706865	+
Q8CHW4	Translation initiation factor eIF-2B subunit epsilon	Eif2b5	0.662451	0.695867	0.757089	0.001541	0.012161	0.705136	+
Q7TSG2	RNA polymerase II subunit A C-terminal domain phosphatase	Ctdp1	0.7144	0.77098	0.626077	0.00357	0.016714	0.703819	+
P26231	Catenin alpha-1	Ctnna1	0.714007	0.750941	0.643626	0.002	0.013365	0.702858	+
Q80Y84	Lysine-specific demethylase 5B	Kdm5b	0.536138	0.874438	0.69633	0.01881	0.043987	0.702302	+
P60843	Eukaryotic initiation factor 4A-I	Eif4a1	0.709551	0.664376	0.732006	0.000802	0.010036	0.701978	+
Q9R061	Cytosolic Fe-S cluster assembly factor NUBP2	Nubp2	0.69039	NA	0.710589	0.009178	0.02811	0.700489	+
P70670	Nascent polypeptide-associated complex subunit alpha, muscle-specific form	Naca	0.781877	0.648553	0.660964	0.0037	0.017043	0.697131	+
P62908	40S ribosomal protein S3	Rps3	0.732084	0.722388	0.627568	0.0023	0.013943	0.694014	+
Q8K2T4	Ubiquinol-cytochrome-c reductase complex assembly factor 3	Uqcc3	0.509996	0.840877	0.727145	0.019075	0.044302	0.692673	+
Q91V55	40S ribosomal protein S5;40S ribosomal protein S5, N-terminally processed	Rps5	0.822987	0.552928	0.702004	0.012477	0.034113	0.69264	+
Q5SFM8	RNA-binding protein 27	Rbm27	0.678635	0.763315	0.635002	0.002947	0.015368	0.692317	+
Q8K4F5	Alpha/beta hydrolase domain-containing protein 11	Abhd11	0.675951	NA	0.706832	0.014215	0.036923	0.691391	+
Q9CWK8	Sorting nexin-2	Snx2	0.714531	0.578335	0.778279	0.007217	0.024247	0.690382	+
Q3UGB5	DAZ-associated protein 1	Dazap1	0.665973	0.825153	0.579322	0.010706	0.031112	0.690149	+
Q09XV5	Chromodomain-helicase-DNA-binding protein 8	Chd8	0.704817	0.674148	NA	0.014157	0.036841	0.689483	+
B9EJ54		Nup205	0.68826	0.695511	0.683841	2.4e-05	0.006528	0.689204	+
Q6ZWZ4	60S ribosomal protein L36	Rpl36	0.800485	0.579234	0.68599	0.008498	0.026924	0.688569	+
P47738	Aldehyde dehydrogenase, mitochondrial	Aldh2	0.659328	0.63144	0.77346	0.003963	0.017855	0.688076	+
E9Q3X0		Mvp	0.551555	0.660619	0.85083	0.015788	0.039482	0.687668	+
O55091	Protein IMPACT	Impact	0.673799	0.614874	0.773909	0.004528	0.018873	0.687527	+
D3YWS7	Fucose mutarotase	Fuom	0.671375	0.666674	0.722385	0.000674	0.009561	0.686811	+
Q8BFX0	DNA-directed RNA polymerases I, II, and III subunit RPABC4	Polr2k	0.631745	0.73662	NA	0.048697	0.084863	0.684183	+
Q9CWI3	BRCA2 and CDKN1A-interacting protein	Bccip	0.417504	0.944797	0.689802	0.046135	0.081859	0.684034	+
Q00PI9	Heterogeneous nuclear ribonucleoprotein U-like protein 2	Hnrnpul2	0.796782	0.860663	0.391926	0.043188	0.07767	0.683124	+
E9Q4K9	E3 ubiquitin-protein ligase SMURF1	Smurf1	0.661908	0.817553	0.564606	0.011488	0.032313	0.681356	+
Q505D1	Serine/threonine-protein phosphatase 6 regulatory ankyrin repeat subunit A	Ankrd28	0.484015	0.813956	0.745232	0.02109	0.047623	0.681068	+
Q6P5D8	Structural maintenance of chromosomes flexible hinge domain-containing protein 1	Smchd1	0.75032	0.664376	0.618472	0.003235	0.015919	0.677723	+
P62075	Mitochondrial import inner membrane translocase subunit Tim13	Timm13	0.690656	0.658554	0.683124	0.000205	0.008631	0.677445	+
Q9Z199	Transcription elongation factor SPT4-B;Transcription elongation factor SPT4-A	Supt4h1b;Supt4h1a;Supt4a	0.368977	0.868566	0.793859	0.048948	0.085135	0.677134	+
Q9D071	MMS19 nucleotide excision repair protein homolog	Mms19	0.659056	0.709658	0.65975	0.000613	0.009322	0.676154	+
P25444	40S ribosomal protein S2	Rps2;Gm5786;Gm18025;Gm6576;Gm8225	0.777751	0.436546	0.812773	0.030122	0.060628	0.67569	+
G5E8I8	Calcium homeostasis endoplasmic reticulum protein	Cherp	0.639483	0.752537	0.632652	0.003301	0.016101	0.674891	+
Q8CGC6	RNA-binding protein 28	Rbm28	0.657968	0.70778	0.656953	0.000618	0.009362	0.674234	+
Q91WE2	Protein FAM192A	Fam192a	0.726127	NA	0.622093	0.049027	0.085185	0.67411	+
Q9D938	Transmembrane protein 160	Tmem160	0.665296	0.759353	0.596938	0.004846	0.019654	0.673863	+
E9Q456		Tpm1	0.707843	NA	0.639813	0.03211	0.063355	0.673828	+
Q8R332	Nucleoporin p58/p45	Nupl1	0.700465	0.651732	0.660478	0.0005	0.009072	0.670891	+
P62267	40S ribosomal protein S23	Rps23	0.68746	0.559192	0.764451	0.007881	0.0256	0.670368	+
Q9DB60	Prostamide/prostaglandin F synthase	Fam213b	0.653608	NA	0.686944	0.015828	0.039512	0.670276	+
Q9JHS9	Spliceosome-associated protein CWC15 homolog	Cwc15	0.627861	NA	0.710941	0.039455	0.072873	0.669401	+
P21956	Lactadherin	Mfge8	0.829887	0.747746	0.424219	0.032752	0.06419	0.667284	+
Q8BP67	60S ribosomal protein L24	Rpl24	0.66123	0.842268	0.495507	0.021845	0.048858	0.666335	+
Q8VE99	Coiled-coil domain-containing protein 115	Ccdc115	0.644985	NA	0.686467	0.019828	0.045475	0.665726	+
B2RY56	RNA-binding protein 25	Rbm25	0.663535	0.732585	0.595542	0.003532	0.016643	0.663887	+
Q6ZWY3	40S ribosomal protein S27-like;40S ribosomal protein S27	Rps27l	0.664348	0.70731	0.617097	0.001541	0.012161	0.662918	+
Q9CZG9	PDZ domain-containing protein 11	Pdzd11	0.828437	0.552536	0.60251	0.016082	0.039796	0.661161	+
Q8R2Q4	Ribosome-releasing factor 2, mitochondrial	Gfm2	0.798141	0.621498	0.563048	0.011241	0.031943	0.660896	+
Q80U93	Nuclear pore complex protein Nup214	Nup214	0.490447	0.747289	0.742711	0.016126	0.039796	0.660149	+
Q9JKY0	Cell differentiation protein RCD1 homolog	Rqcd1	0.655108	NA	0.663995	0.004289	0.018422	0.659551	+
Q8K0D5	Elongation factor G, mitochondrial	Gfm1	0.701521	0.580518	0.696449	0.003571	0.016714	0.659496	+
P05063	Fructose-bisphosphate aldolase C	Aldoc	0.519417	0.627223	0.831657	0.01874	0.043897	0.659432	+
Q8K1A5	Transmembrane protein 41B	Tmem41b	0.647043	NA	0.670882	0.011514	0.032366	0.658962	+
O08528	Hexokinase-2	Hk2	0.630637	0.622994	0.721105	0.002283	0.013943	0.658245	+
Q6ZQ08	CCR4-NOT transcription complex subunit 1	Cnot1	0.602494	0.651854	0.71223	0.002335	0.013969	0.655526	+
P27612	Phospholipase A-2-activating protein	Plaa	0.63479	0.656608	0.669435	0.000239	0.008692	0.653611	+
Q569Z5	Probable ATP-dependent RNA helicase DDX46	Ddx46	0.673395	0.692071	0.595288	0.002051	0.013505	0.653585	+
Q80Y81	Zinc phosphodiesterase ELAC protein 2	Elac2	0.663671	0.672343	0.623464	0.000531	0.009157	0.653159	+
Q91YR7	Pre-mRNA-processing factor 6	Prpf6	0.667055	0.689576	0.600993	0.001655	0.012455	0.652541	+
Q99MR6	Serrate RNA effector molecule homolog	Srrt	0.639896	0.729348	0.587647	0.003999	0.01788	0.652297	+
Q91VC3	Eukaryotic initiation factor 4A-III;Eukaryotic initiation factor 4A-III, N-terminally processed	Eif4a3;Gm8994	0.642649	0.817879	0.494282	0.019984	0.045665	0.651603	+
P62754	40S ribosomal protein S6	Rps6	0.677025	0.583081	0.692417	0.002745	0.014812	0.650841	+
O09005	Sphingolipid delta(4)-desaturase DES1	Degs1	0.64622	NA	0.653541	0.003586	0.016762	0.649881	+
Q9CQM9	Glutaredoxin-3	Glrx3	0.692782	0.638236	0.608186	0.001464	0.011992	0.646401	+
Q8BGQ7	Alanine--tRNA ligase, cytoplasmic	Aars	0.631884	0.789302	0.517794	0.014508	0.037411	0.646326	+
Q3UE92	Xaa-Pro aminopeptidase 1	Xpnpep1	0.654699	0.595959	0.680852	0.001517	0.012097	0.643837	+
Q9CXY6	Interleukin enhancer-binding factor 2	Ilf2	0.745079	0.763992	0.419492	0.028946	0.059102	0.642855	+
P46935	E3 ubiquitin-protein ligase NEDD4	Nedd4	0.653198	0.683138	0.588157	0.001905	0.013184	0.641498	+
Q9CYA6	Zinc finger CCHC domain-containing protein 8	Zcchc8	0.682118	0.627968	0.609696	0.001153	0.011086	0.639927	+
Q9CWL8	Beta-catenin-like protein 1	Ctnnbl1	0.429716	0.83766	0.65171	0.032339	0.063716	0.639695	+
P70404	Isocitrate dehydrogenase [NAD] subunit gamma 1, mitochondrial	Idh3g	0.54542	0.777038	0.5916	0.012083	0.033295	0.638019	+
Q9EST5	Acidic leucine-rich nuclear phosphoprotein 32 family member B	Anp32b	0.724439	0.662923	0.517391	0.009219	0.028209	0.634918	+
Q3U9G9	Lamin-B receptor	Lbr	0.591424	0.700714	0.607808	0.002875	0.015115	0.633316	+
Q9CQI9	Mediator of RNA polymerase II transcription subunit 30	Med30	0.650329	NA	0.61597	0.017269	0.041664	0.63315	+
B1AYU7	Pre-mRNA-splicing factor CWC22 homolog	Cwc22;Gm13695;Gm13697	0.494842	0.893566	0.510538	0.039899	0.073462	0.632982	+
Q9ERU9	E3 SUMO-protein ligase RanBP2	Ranbp2	0.486668	0.639098	0.761624	0.015607	0.039238	0.62913	+
Q9JK81	UPF0160 protein MYG1, mitochondrial	Myg1	0.658784	0.664255	0.557061	0.003079	0.015639	0.6267	+
P62702	40S ribosomal protein S4, X isoform;40S ribosomal protein S4	Rps4x;Gm15013	0.686527	0.515973	0.676536	0.007694	0.025303	0.626345	+
Q9D8N0	Elongation factor 1-gamma	Eef1g	0.628555	0.579106	0.671364	0.001806	0.012911	0.626342	+
Q9CZX8	40S ribosomal protein S19	Rps19	0.747127	0.518386	0.610953	0.011092	0.03175	0.625489	+
Q61183	Poly(A) polymerase alpha	Papola	0.673126	0.597101	0.605792	0.001473	0.011992	0.62534	+
Q9D7V9	N-acylethanolamine-hydrolyzing acid amidase;N-acylethanolamine-hydrolyzing acid amidase subunit alpha;N-acylethanolamine-hydrolyzing acid amidase subunit beta	Naaa	0.792451	0.648675	0.433343	0.026776	0.056151	0.624823	+
Q8QZY1	Eukaryotic translation initiation factor 3 subunit L	Eif3l	0.654154	0.653318	0.563438	0.002321	0.013943	0.623637	+
P62806	Histone H4	Hist1h4a	0.741103	0.768166	0.359193	0.042129	0.076215	0.622821	+
E9QAS4	Chromodomain-helicase-DNA-binding protein 4	Chd4	0.646906	0.597734	NA	0.025137	0.053956	0.62232	+
Q62276	Mediator of RNA polymerase II transcription subunit 22	Med22	0.734796	0.474737	0.656588	0.014993	0.038289	0.62204	+
P62900	60S ribosomal protein L31	Rpl31	0.728202	0.601912	0.531267	0.008509	0.026924	0.62046	+
Q80TE4	Signal-induced proliferation-associated 1-like protein 2	Sipa1l2	0.638656	0.677631	0.535907	0.004655	0.019181	0.617398	+
E9PUQ9	Piezo-type mechanosensitive ion channel component;Piezo-type mechanosensitive ion channel component 1	Piezo1	0.627722	0.602038	NA	0.013294	0.035444	0.61488	+
Q8BU30	Isoleucine--tRNA ligase, cytoplasmic	Iars	0.58328	0.687671	0.573144	0.003527	0.016643	0.614698	+
O88520	Leucine-rich repeat protein SHOC-2	Shoc2	0.571439	0.753447	0.514573	0.013526	0.035812	0.613153	+
Q9D187	Mitotic spindle-associated MMXD complex subunit MIP18	Fam96b	0.697952	0.625607	0.510807	0.007847	0.025564	0.611456	+
Q9ER81	Torsin-1A-interacting protein 2, isoform IFRG15	Tor1aip2	0.76429	0.358683	0.707185	0.040567	0.07429	0.610053	+
Q80UK8	Integrator complex subunit 2	Ints2	0.675144	0.599635	0.555103	0.003283	0.016084	0.609961	+
Q6P1H6	Ankyrin repeat and LEM domain-containing protein 2	Ankle2	0.711912	0.476531	0.637964	0.012781	0.034623	0.608802	+
Q9D1J3	SAP domain-containing ribonucleoprotein	Sarnp	0.703236	0.4908	0.630298	0.01034	0.030463	0.608111	+
Q8C2E7	WASH complex subunit strumpellin	Kiaa0196	0.572205	0.606959	0.643503	0.001146	0.011086	0.607556	+
Q69ZX6	MORC family CW-type zinc finger protein 2A	Morc2a	0.417311	0.771542	0.630794	0.027633	0.057304	0.606549	+
Q62093	Serine/arginine-rich splicing factor 2	Srsf2	0.626471	0.837767	0.353497	0.049574	0.085954	0.605912	+
Q61990	Poly(rC)-binding protein 2	Pcbp2	0.502651	0.584489	0.727145	0.011561	0.032385	0.604762	+
E9Q4Q2	Splicing factor 1	Sf1	0.586	0.670778	0.556931	0.003176	0.015919	0.604569	+
Q8BMJ2	Leucine--tRNA ligase, cytoplasmic	Lars	0.559472	0.701894	0.547902	0.006673	0.02324	0.603089	+
Q6P542	ATP-binding cassette sub-family F member 1	Abcf1	0.591139	0.628713	0.587519	0.000478	0.009072	0.602457	+
Q924T7	E3 ubiquitin-protein ligase RNF31	Rnf31	0.554014	0.502494	0.750489	0.015373	0.038802	0.602332	+
P42932	T-complex protein 1 subunit theta	Cct8	0.61992	0.579234	0.607808	0.000401	0.009029	0.602321	+
G3X8R5	Glutamine-rich protein 1	Qrich1	0.58156	0.650632	0.573789	0.001642	0.012455	0.601994	+
P70227	Inositol 1,4,5-trisphosphate receptor type 3	Itpr3	0.579693	0.622495	NA	0.022656	0.050152	0.601094	+
O70310	Glycylpeptide N-tetradecanoyltransferase 1	Nmt1	0.550691	0.62772	0.623464	0.001728	0.012613	0.600625	+
P61087	Ubiquitin-conjugating enzyme E2 K	Ube2k	0.591424	NA	0.60957	0.009618	0.029003	0.600497	+
P32067	Lupus La protein homolog	Ssb	0.748661	0.610357	0.441845	0.02115	0.047666	0.600287	+
Q9CR70	EKC/KEOPS complex subunit Lage3	Lage3	0.671914	0.525868	0.601372	0.004908	0.019765	0.599718	+
Q9JKB3	Y-box-binding protein 3	Ybx3	0.681984	0.524268	0.592745	0.005748	0.021479	0.599666	+
Q8BTI8	Serine/arginine repetitive matrix protein 2	Srrm2	0.581273	0.761278	0.455064	0.021287	0.04787	0.599205	+
O08583	THO complex subunit 4;Aly/REF export factor 2	Alyref;Alyref2	0.562717	NA	0.634384	0.038067	0.07098	0.59855	+
Q8VE18	Protein SMG8	Smg8	0.648276	0.583081	0.563828	0.001818	0.012934	0.598395	+
Q8K183	Pyridoxal kinase	Pdxk	0.552068	0.735123	0.507706	0.013264	0.03544	0.598299	+
Q8BIG7	Catechol O-methyltransferase domain-containing protein 1	Comtd1	0.59299	NA	0.601878	0.004735	0.019337	0.597434	+
P62264	40S ribosomal protein S14	Rps14	0.709157	0.578206	0.504734	0.009868	0.029561	0.597366	+
P80317	T-complex protein 1 subunit zeta	Cct6a	0.616004	0.563482	0.611079	0.000786	0.009991	0.596855	+
Q3TIX9	U4/U6.U5 tri-snRNP-associated protein 2	Usp39	0.628555	0.753903	0.406883	0.027735	0.057429	0.596447	+
Q8VDF2	E3 ubiquitin-protein ligase UHRF1	Uhrf1	0.735956	0.434418	0.618347	0.020978	0.047409	0.596241	+
Q3V117		Acly	0.602918	0.535694	0.647184	0.002951	0.015371	0.595266	+
Q8BHJ5	F-box-like/WD repeat-containing protein TBL1XR1	Tbl1xr1	0.758972	0.601912	0.421356	0.025914	0.05499	0.59408	+
P62245	40S ribosomal protein S15a	Rps15a	0.679976	0.550311	0.550656	0.005245	0.020429	0.593647	+
Q7TSV4	Phosphoglucomutase-2	Pgm2	0.764038	0.448968	0.567717	0.023126	0.050876	0.593574	+
P62311	U6 snRNA-associated Sm-like protein LSm3	Lsm3	0.652925	0.614874	0.510942	0.005083	0.020128	0.592914	+
P60898	DNA-directed RNA polymerase II subunit RPB9;DNA-directed RNA polymerase subunit	Polr2i	0.707186	0.636262	0.432206	0.018845	0.044019	0.591885	+
O35218	Cleavage and polyadenylation specificity factor subunit 2	Cpsf2	0.643474	0.622495	0.509055	0.004943	0.019847	0.591675	+
E9PZ16	Basement membrane-specific heparan sulfate proteoglycan core protein;Endorepellin;LG3 peptide	Hspg2	0.672857	0.617127	0.482106	0.009066	0.027891	0.590696	+
P11499	Heat shock protein HSP 90-beta	Hsp90ab1	0.685059	0.453878	0.631042	0.013717	0.036157	0.589993	+
P80316	T-complex protein 1 subunit epsilon	Cct5	0.602494	0.597101	0.570175	0.000287	0.009029	0.589923	+
A2AJ72		Fubp3	0.654017	0.623243	0.490872	0.007134	0.024097	0.589377	+
Q99JF8	PC4 and SFRS1-interacting protein	Psip1	0.747255	0.624986	0.395286	0.029321	0.059629	0.589175	+
Q3UVG3	Protein FAM91A1	Fam91a1	0.577393	0.470728	0.719124	0.01459	0.037493	0.589082	+
A2A8R7	Terminal uridylyltransferase 4	Zcchc11	0.678769	0.50019	0.586113	0.007593	0.025104	0.588357	+
Q9CPQ3	Mitochondrial import receptor subunit TOM22 homolog	Tomm22	0.648276	0.435128	0.68145	0.016778	0.040913	0.588285	+
Q9DCN2	NADH-cytochrome b5 reductase 3;NADH-cytochrome b5 reductase 3 membrane-bound form;NADH-cytochrome b5 reductase 3 soluble form;NADH-cytochrome b5 reductase	Cyb5r3	0.542652	0.605321	0.614592	0.001476	0.011992	0.587522	+
Q9Z0N1	Eukaryotic translation initiation factor 2 subunit 3, X-linked	Eif2s3x	0.56578	0.635398	0.558886	0.00173	0.012613	0.586688	+
Q61749	Translation initiation factor eIF-2B subunit delta	Eif2b4	0.50595	0.562963	0.689802	0.008481	0.026919	0.586238	+
E9Q4M4	MICOS complex subunit Mic25	Chchd6	0.622154	NA	0.548296	0.040119	0.073734	0.585225	+
O08648	Mitogen-activated protein kinase kinase kinase 4	Map3k4	0.768581	0.449811	0.536437	0.025461	0.054365	0.584943	+
Q8VCL2	Protein SCO2 homolog, mitochondrial	Sco2	0.630082	NA	0.538288	0.049914	0.086332	0.584185	+
P80313	T-complex protein 1 subunit eta	Cct7	0.576386	0.525868	0.649877	0.003778	0.017287	0.584043	+
Q8QZV7	Protein asunder homolog	Asun	0.559588	0.624986	0.564087	0.001306	0.0116	0.582887	+
Q80V86	Integrator complex subunit 8	Ints8	0.652106	0.552143	0.542378	0.003607	0.016803	0.582209	+
Q6P4T2	U5 small nuclear ribonucleoprotein 200 kDa helicase	Snrnp200	0.616144	0.706957	0.418918	0.020772	0.047125	0.580673	+
Q9QZM0	Ubiquilin-2	Ubqln2	-0.467019	-0.773355	-0.505827	0.026296	0.055443	-0.582067	+
P63213	Guanine nucleotide-binding protein G(I)/G(S)/G(O) subunit gamma-2	Gng2	-0.522707	-0.507072	-0.722391	0.013794	0.036288	-0.584057	+
Q61655	ATP-dependent RNA helicase DDX19A	Ddx19a;Ddx19b	-0.391495	-0.686469	-0.678087	0.026357	0.055443	-0.58535	+
Q99LB2	Dehydrogenase/reductase SDR family member 4	Dhrs4	-0.591007	NA	-0.5818	0.004998	0.019971	-0.586403	+
Q8K4Z3	NAD(P)H-hydrate epimerase	Apoa1bp	-0.561688	-0.610073	-0.58845	0.000568	0.009157	-0.586737	+
Q9DCW4	Electron transfer flavoprotein subunit beta	Etfb	-0.576817	NA	-0.597161	0.011031	0.0317	-0.586989	+
Q9CPV4	Glyoxalase domain-containing protein 4	Glod4	-0.582367	NA	-0.597132	0.007969	0.025744	-0.58975	+
E9Q9C5	V-type proton ATPase 16 kDa proteolipid subunit	Atp6v0c	-0.491105	-0.61318	-0.676492	0.008296	0.026475	-0.593592	+
Q3U2P1	Protein transport protein Sec24A	Sec24a	-0.541925	-0.745457	-0.501854	0.015615	0.039238	-0.596412	+
O09131	Glutathione S-transferase omega-1	Gsto1	-0.550232	NA	-0.643413	0.049597	0.085956	-0.596822	+
Q9CQZ6	NADH dehydrogenase [ubiquinone] 1 beta subcomplex subunit 3	Ndufb3	-0.578708	-0.588131	-0.633971	0.000808	0.010036	-0.60027	+
Q9DC69	NADH dehydrogenase [ubiquinone] 1 alpha subcomplex subunit 9, mitochondrial	Ndufa9	-0.569408	-0.589863	-0.652282	0.001699	0.012529	-0.603851	+
Q9JKR6	Hypoxia up-regulated protein 1	Hyou1	-0.602435	-0.654801	-0.554515	0.002292	0.013943	-0.603917	+
E9QJU8	Apoptosis-stimulating of p53 protein 2	Trp53bp2;Tp53bp2	-0.607757	NA	-0.610108	0.001229	0.011384	-0.608933	+
P47856	Glutamine--fructose-6-phosphate aminotransferase [isomerizing] 1	Gfpt1	-0.53977	-0.778084	-0.511506	0.018685	0.043829	-0.609787	+
G5E897		Kdelc2	-0.626525	-0.724003	-0.479047	0.013359	0.035553	-0.609859	+
Q9CZL5	Pterin-4-alpha-carbinolamine dehydratase 2	Pcbd2	-0.768872	-0.388839	-0.671898	0.033213	0.064877	-0.60987	+
E0CXA9	MOB-like protein phocein	Mob4	-0.641952	NA	-0.579246	0.032661	0.064042	-0.610599	+
E9PVN6		Gm20498	-0.635401	-0.553367	-0.647976	0.002339	0.013974	-0.612248	+
O35683	NADH dehydrogenase [ubiquinone] 1 alpha subcomplex subunit 1	Ndufa1	-0.575729	-0.556411	-0.704988	0.005751	0.021479	-0.612376	+
Q9CR67	Transmembrane protein 33	Tmem33	-0.597229	-0.695357	-0.555897	0.004475	0.018816	-0.616161	+
O09111	NADH dehydrogenase [ubiquinone] 1 beta subcomplex subunit 11, mitochondrial	Ndufb11	-0.667706	-0.489673	-0.70021	0.010985	0.031637	-0.619196	+
Q9CR00	26S proteasome non-ATPase regulatory subunit 9	Psmd9	-0.596742	NA	-0.642513	0.023503	0.051497	-0.619628	+
Q3UFY7	7-methylguanosine phosphate-specific 5-nucleotidase	Nt5c3b	-0.486135	-0.604082	-0.772944	0.017489	0.041938	-0.621054	+
P24527	Leukotriene A-4 hydrolase	Lta4h	-0.577041	-0.624168	-0.667807	0.001765	0.01273	-0.623006	+
Q99LY9	NADH dehydrogenase [ubiquinone] iron-sulfur protein 5;NADH dehydrogenase [ubiquinone] iron-sulfur protein 5, N-terminally processed	Ndufs5	-0.559978	-0.604053	-0.709123	0.004982	0.01993	-0.624384	+
P53810	Phosphatidylinositol transfer protein alpha isoform	Pitpna	-0.649475	-0.714244	-0.523814	0.007802	0.025472	-0.629178	+
O08547	Vesicle-trafficking protein SEC22b	Sec22b	-0.633069	NA	-0.631769	0.000654	0.009561	-0.632419	+
Q63829	COMM domain-containing protein 3	Commd3	-0.624571	NA	-0.642783	0.009148	0.028079	-0.633677	+
Q60597	2-oxoglutarate dehydrogenase, mitochondrial	Ogdh	-0.64279	-0.660036	-0.604232	0.000673	0.009561	-0.635686	+
Q9DCS9	NADH dehydrogenase [ubiquinone] 1 beta subcomplex subunit 10	Ndufb10	-0.605469	NA	-0.667594	0.031042	0.061766	-0.636532	+
A0A087WQN7	5-3 exoribonuclease 1	Xrn1	-0.500671	-0.709876	-0.702206	0.011344	0.032108	-0.637585	+
Q99K01	Pyridoxal-dependent decarboxylase domain-containing protein 1	Pdxdc1	-0.666104	-0.635181	-0.620544	0.000439	0.009029	-0.64061	+
Q9QXJ1	Amyloid beta A4 precursor protein-binding family B member 1	Apbb1	-0.663926	-0.615059	-0.643832	0.000489	0.009072	-0.640939	+
Q3V009	Transmembrane emp24 domain-containing protein 1	Tmed1	-0.609001	NA	-0.674377	0.032402	0.063778	-0.641689	+
Q3TVK3	Aspartyl aminopeptidase	Dnpep	-0.627122	-0.66307	-0.637131	0.000278	0.009029	-0.642441	+
Q91YY4	ATP synthase mitochondrial F1 complex assembly factor 2	Atpaf2	-0.632104	NA	-0.65639	0.011998	0.033135	-0.644247	+
Q5SQX6	Cytoplasmic FMR1-interacting protein 2	Cyfip2	-0.569344	-0.54699	-0.820376	0.017936	0.042597	-0.64557	+
Q91WK5	Glycine cleavage system H protein, mitochondrial	Gcsh	-0.635301	-0.761955	-0.541329	0.009644	0.029059	-0.646195	+
Q8VC57	BTB/POZ domain-containing protein KCTD5	Kctd5	-0.656192	NA	-0.640598	0.007655	0.025214	-0.648395	+
Q5XJY5	Coatomer subunit delta	Arcn1	-0.514374	-0.739936	-0.692653	0.011014	0.031675	-0.648988	+
Q91X76		Nt5dc2	-0.585907	-0.796794	-0.565464	0.012717	0.034552	-0.649388	+
D3YWT0	Signal peptidase complex catalytic subunit SEC11;Signal peptidase complex catalytic subunit SEC11A	Sec11a	-0.636369	-0.603499	-0.709531	0.002318	0.013943	-0.649799	+
P99024	Tubulin beta-5 chain	Tubb5	-0.534413	-0.736767	-0.688286	0.008609	0.027069	-0.653155	+
P70677	Caspase-3;Caspase-3 subunit p17;Caspase-3 subunit p12	Casp3	-0.484122	-0.952445	-0.53217	0.047729	0.083752	-0.656246	+
Q8VDP6	CDP-diacylglycerol--inositol 3-phosphatidyltransferase	Cdipt	-0.673344	-0.668092	-0.628562	0.000463	0.009038	-0.656666	+
Q9WV85	Nucleoside diphosphate kinase 3	Nme3	-0.676566	-0.705834	-0.599951	0.002275	0.013943	-0.660783	+
E9QKE4	Rab3 GTPase-activating protein non-catalytic subunit	Rab3gap2	-0.685583	-0.767268	-0.553585	0.008553	0.027021	-0.668812	+
G5E8N7	Bifunctional polynucleotide phosphatase/kinase;Polynucleotide 3-phosphatase;Polynucleotide 5-hydroxyl-kinase	Pnkp	-0.419273	-0.798695	-0.792056	0.033281	0.064948	-0.670008	+
P62748	Hippocalcin-like protein 1	Hpcal1	-0.6689	NA	-0.671623	0.001293	0.0116	-0.670262	+
G3X972		Sec24c	-0.635935	-0.686376	-0.696504	0.000774	0.009991	-0.672938	+
P83887	Tubulin gamma-1 chain;Tubulin gamma-2 chain	Tubg1;Tubg2	-0.559851	-0.842367	-0.617479	0.015997	0.039717	-0.673232	+
P63168	Dynein light chain 1, cytoplasmic	Dynll1;BC048507	-0.744391	-0.599278	-0.676154	0.003853	0.017532	-0.673274	+
E9PVZ8		Golgb1	-0.661683	-0.686098	NA	0.011531	0.032366	-0.673891	+
Q9JIF7	Coatomer subunit beta	Copb1	-0.685169	-0.711886	-0.633078	0.001167	0.011123	-0.676711	+
G8JL68	Myelin expression factor 2	Myef2	-0.530655	-0.794263	-0.708621	0.012866	0.03476	-0.677846	+
E9QKT1	Ubiquitin-protein ligase E3A	Ube3a	-0.654265	-0.678709	-0.711572	0.000593	0.009182	-0.681515	+
Q3UGS4	Protein FAM195B	Fam195b	-0.628183	-0.68283	-0.734345	0.002015	0.013386	-0.681786	+
Q5SWU9	Acetyl-CoA carboxylase 1;Biotin carboxylase	Acaca	-0.650419	-0.71667	NA	0.030828	0.061476	-0.683544	+
O55029	Coatomer subunit beta	Copb2	-0.655346	-0.740865	-0.662695	0.001586	0.012341	-0.686302	+
P53995	Anaphase-promoting complex subunit 1	Anapc1	-0.656158	-0.713175	-0.68974	0.000581	0.009157	-0.686358	+
E9PX30	Mitogen-activated protein kinase kinase kinase kinase;Mitogen-activated protein kinase kinase kinase kinase 5	Map4k5	-0.627387	-0.745361	-0.704081	0.002483	0.014195	-0.692276	+
P35279	Ras-related protein Rab-6A	Rab6a	-0.709535	-0.62544	-0.748719	0.00273	0.014782	-0.694565	+
Q9WV54	Acid ceramidase;Acid ceramidase subunit alpha;Acid ceramidase subunit beta	Asah1	-0.613132	-0.72185	-0.752206	0.003662	0.016982	-0.695729	+
E9QLQ9	Adenomatous polyposis coli protein	Apc	-0.731751	-0.665442	NA	0.030191	0.060707	-0.698597	+
Q9CZU6	Citrate synthase, mitochondrial	Cs	-0.708062	-0.686685	-0.705144	9.1e-05	0.008336	-0.699964	+
Q8BZQ7	Anaphase-promoting complex subunit 2	Anapc2	-0.680964	-0.739327	-0.689338	0.000671	0.009561	-0.70321	+
Q8BVQ5	Protein phosphatase methylesterase 1	Ppme1	-0.699391	-0.720048	-0.692746	0.000136	0.008573	-0.704062	+
B9EKJ3	Protein MON2 homolog	Mon2	-0.70358	-0.756046	-0.656541	0.001656	0.012455	-0.705389	+
Q9EP69	Phosphatidylinositide phosphatase SAC1	Sacm1l	-0.769311	-0.601722	-0.746915	0.005491	0.020906	-0.705983	+
P62737	Actin, aortic smooth muscle;Actin, gamma-enteric smooth muscle	Acta2;Actg2	-0.499154	-0.975046	-0.650625	0.037105	0.069693	-0.708275	+
Q9WTL7	Acyl-protein thioesterase 2	Lypla2	-0.675434	NA	-0.744758	0.031051	0.061766	-0.710096	+
Q3U487	E3 ubiquitin-protein ligase HECTD3	Hectd3	-0.685376	-0.670197	-0.781825	0.002398	0.014056	-0.712466	+
Q6A0A9	Constitutive coactivator of PPAR-gamma-like protein 1	FAM120A	-0.796832	-0.756662	-0.59264	0.007536	0.024982	-0.715378	+
J3QM81	Ankyrin repeat and zinc finger domain-containing protein 1	Ankzf1	-0.565114	-0.674079	-0.91425	0.020025	0.045707	-0.717814	+
Q8R2Y8	Peptidyl-tRNA hydrolase 2, mitochondrial	Ptrh2	-0.548127	-0.999501	-0.605896	0.036883	0.069439	-0.717841	+
F8WGN6	Kinesin-like protein;Kinesin-like protein KIF21A	Kif21a	-0.519288	-0.914703	-0.730297	0.024167	0.052394	-0.721429	+
Q80Y17	Lethal(2) giant larvae protein homolog 1	Llgl1	-0.587648	-0.798761	-0.782452	0.008685	0.027212	-0.722954	+
O08917	Flotillin-1	Flot1	-0.922824	-0.546654	-0.701738	0.021996	0.04906	-0.723739	+
V9GX22	Transmembrane protein 254	Tmem254b;Tmem254	-0.760157	-0.818724	-0.597277	0.008238	0.026351	-0.725386	+
Q501J7	Phosphatase and actin regulator 4	Phactr4	-0.773489	-0.727144	-0.678364	0.001427	0.011992	-0.726332	+
P10639	Thioredoxin	Txn	-0.708167	-0.491614	-0.981278	0.035936	0.068349	-0.727019	+
O55125	Protein NipSnap homolog 1	Nipsnap1	-0.713789	NA	-0.741194	0.011989	0.033134	-0.727491	+
Q6ZQI3	Malectin	Mlec	-0.732144	NA	-0.728133	0.001748	0.012699	-0.730139	+
Q9D0F3	Protein ERGIC-53	Lman1	-0.738218	-0.691324	-0.762	0.000807	0.010036	-0.730514	+
Q02819	Nucleobindin-1	Nucb1	-0.638907	-0.82915	-0.724673	0.005616	0.021196	-0.73091	+
Q9CQB5	CDGSH iron-sulfur domain-containing protein 2	Cisd2	-0.685342	-0.762541	-0.745852	0.001027	0.010729	-0.731245	+
Q9CR13	UPF0562 protein C7orf55 homolog		-0.745326	-0.765506	-0.685352	0.001079	0.010911	-0.732061	+
Q922R8	Protein disulfide-isomerase A6	Pdia6	-0.753953	-0.808204	-0.636207	0.004765	0.019421	-0.732788	+
Q9CYN2	Signal peptidase complex subunit 2	Spcs2	-0.660393	-0.825099	-0.718502	0.004282	0.01842	-0.734665	+
F6ZBR8		Wiz	-0.674954	-0.686036	-0.844398	0.005497	0.020906	-0.735129	+
Q6DFZ1		Gbf1	-0.684582	-0.831948	-0.692436	0.004199	0.018211	-0.736322	+
Q6PIC6	Sodium/potassium-transporting ATPase subunit alpha-3	Atp1a3	-0.812204	-0.497344	-0.899641	0.026434	0.055497	-0.736396	+
Q3U7R1	Extended synaptotagmin-1	Esyt1	-0.6915	-0.763778	-0.75849	0.000992	0.010474	-0.737923	+
Q91WK1	SPRY domain-containing protein 4	Spryd4	-0.722087	NA	-0.754308	0.013891	0.036382	-0.738198	+
P26041	Moesin	Msn	-0.816583	-0.743497	-0.666345	0.003399	0.016409	-0.742142	+
Q3TJD7	PDZ and LIM domain protein 7	Pdlim7	-0.824203	-0.948256	-0.454437	0.037682	0.070486	-0.742298	+
P62342	Selenoprotein T	Selt	-0.71901	-0.785175	-0.740873	0.000676	0.009561	-0.748353	+
Q8CIE6	Coatomer subunit alpha;Xenin;Proxenin;Coatomer subunit alpha	Copa	-0.735071	-0.820112	-0.706866	0.002031	0.013446	-0.754016	+
Q9D0F9	Phosphoglucomutase-1	Pgm1	-0.754858	-0.874859	-0.639312	0.007987	0.025744	-0.756343	+
P97390	Vacuolar protein sorting-associated protein 45	Vps45	-0.969687	-0.427433	-0.873459	0.045416	0.080827	-0.75686	+
Q8C079	Striatin-interacting protein 1	Strip1	-0.66607	-0.823265	-0.783673	0.003859	0.017539	-0.75767	+
Q61753	D-3-phosphoglycerate dehydrogenase	Phgdh	-0.697475	-0.830378	-0.75072	0.002575	0.014497	-0.759524	+
Q924A2	Protein capicua homolog	Cic	-0.7436	-0.77667	NA	0.013846	0.036343	-0.760135	+
Q8BGX2	Uncharacterized protein C19orf52 homolog		-0.815714	NA	-0.710159	0.043969	0.07883	-0.762936	+
P61963	DDB1- and CUL4-associated factor 7	Dcaf7	-1.00101	-0.754297	-0.538093	0.029264	0.059555	-0.764467	+
P49769	Presenilin-1;Presenilin-1 NTF subunit;Presenilin-1 CTF subunit;Presenilin-1 CTF12	Psen1	-0.719823	-0.662099	-0.911792	0.009604	0.028995	-0.764571	+
P50396	Rab GDP dissociation inhibitor alpha	Gdi1	-0.704279	-0.850508	-0.766498	0.002985	0.015438	-0.773762	+
Q9CQI6	Coactosin-like protein	Cotl1	-0.629976	-0.917926	-0.774453	0.011335	0.032103	-0.774118	+
F6TLV3	Fibronectin type-III domain-containing protein 3A	Fndc3a	-0.756271	-0.775028	-0.791126	0.000169	0.008573	-0.774142	+
Q6P5D3	Putative ATP-dependent RNA helicase DHX57	Dhx57	-0.641885	-0.842574	-0.83814	0.007226	0.024247	-0.7742	+
Q99ME2	WD repeat-containing protein 6	Wdr6	-0.69372	-0.899986	-0.733324	0.006573	0.023146	-0.775677	+
Q78IK4	MICOS complex subunit Mic27	Apool	-0.7223	NA	-0.836152	0.046426	0.082196	-0.779226	+
Q91Z53	Glyoxylate reductase/hydroxypyruvate reductase	Grhpr	-0.844798	-0.818893	-0.677504	0.004408	0.018652	-0.780398	+
P58404	Striatin-4	Strn4	-0.851212	-0.76593	-0.724419	0.002279	0.013943	-0.78052	+
Q3TDQ1	Dolichyl-diphosphooligosaccharide--protein glycosyltransferase subunit STT3B	Stt3b	-0.73457	-0.802705	-0.806348	0.000892	0.010036	-0.781208	+
P49586	Choline-phosphate cytidylyltransferase A	Pcyt1a	-1.05842	-0.604899	-0.681407	0.030692	0.061355	-0.781575	+
Q3UPL0	Protein transport protein Sec31A	Sec31a	-0.796832	-0.855985	-0.693242	0.003678	0.017019	-0.782019	+
Q9R1J0	Sterol-4-alpha-carboxylate 3-dehydrogenase, decarboxylating	Nsdhl	-0.893496	-0.880005	-0.576067	0.017063	0.04138	-0.783189	+
Q7TSI3	Serine/threonine-protein phosphatase 6 regulatory subunit 1	Ppp6r1	-0.627951	-0.893128	-0.831295	0.010275	0.030307	-0.784125	+
G5E829	Plasma membrane calcium-transporting ATPase 1	Atp2b1	-0.787316	-0.724764	-0.852795	0.002191	0.013801	-0.788292	+
Q9D967	Magnesium-dependent phosphatase 1	Mdp1	-0.883838	-0.630094	-0.85623	0.010192	0.030157	-0.790054	+
E9PYG6		Rasa1	-0.713895	-0.733031	-0.933582	0.007748	0.025376	-0.793503	+
Q6P9Q6	FK506-binding protein 15;Peptidyl-prolyl cis-trans isomerase	Fkbp15	-0.905389	-0.718942	-0.764574	0.004929	0.019811	-0.796301	+
Q9DBL7	Bifunctional coenzyme A synthase;Phosphopantetheine adenylyltransferase;Dephospho-CoA kinase	Coasy	-0.91876	-0.963664	-0.506808	0.031744	0.062785	-0.796411	+
Q66JV4	RNA-binding protein 12B-B	Rbm12b2	-0.652678	-1.0261	-0.712987	0.020431	0.046454	-0.797254	+
P15920	V-type proton ATPase 116 kDa subunit a isoform 2	Atp6v0a2	-0.836072	-0.621686	-0.938539	0.013385	0.0356	-0.798766	+
F8VPP8		Zc3h7b	-1.00863	-0.707838	-0.680484	0.016873	0.041047	-0.798985	+
Q9Z1A1		Tfg	-0.926573	-0.763941	-0.709154	0.006596	0.023176	-0.799889	+
Q9D8Y1	Transmembrane protein 126A	Tmem126a	-0.824469	NA	-0.776654	0.019006	0.044268	-0.800561	+
Q91VT4	Carbonyl reductase family member 4	Cbr4	-0.842178	NA	-0.764411	0.030792	0.061448	-0.803294	+
P62880	Guanine nucleotide-binding protein G(I)/G(S)/G(T) subunit beta-2	Gnb2	-0.802961	-0.815681	-0.794916	5.6e-05	0.008336	-0.804519	+
Q99KJ8	Dynactin subunit 2	Dctn2	-0.786242	-0.839	-0.795549	0.000406	0.009029	-0.80693	+
Q3B7Z2	Oxysterol-binding protein 1	Osbp	-0.699809	-0.884354	-0.836803	0.004666	0.019208	-0.806989	+
Q8BP40	Lysophosphatidic acid phosphatase type 6	Acp6	-0.80506	-0.781741	-0.845363	0.000525	0.009157	-0.810721	+
Q80ZX0		Sec24b	-0.797615	-0.828639	-0.820275	0.000129	0.008573	-0.815509	+
G3X9N6	Oxysterol-binding protein	Osbpl8	-0.675091	-0.975725	-0.801289	0.01118	0.031841	-0.817368	+
D3Z125	Tumor protein D52	Tpd52	-0.852839	NA	-0.785756	0.026048	0.05519	-0.819298	+
P24369	Peptidyl-prolyl cis-trans isomerase B	Ppib	-0.917583	-0.617471	-0.927511	0.015015	0.038297	-0.820855	+
Q5U4C1	G-protein coupled receptor-associated sorting protein 1	Gprasp1	-0.866982	-0.752034	-0.845259	0.001837	0.013045	-0.821425	+
Q8BUR4	Dedicator of cytokinesis protein 1	Dock1	-0.748208	-0.933084	-0.793053	0.004526	0.018873	-0.824782	+
Q3UW66	Sulfurtransferase;3-mercaptopyruvate sulfurtransferase	Mpst	-0.825039	NA	-0.825332	0.000113	0.008573	-0.825186	+
Q9ESW8	Pyroglutamyl-peptidase 1	Pgpep1	-0.794707	NA	-0.857377	0.024138	0.052358	-0.826042	+
Q9D2G2	Dihydrolipoyllysine-residue succinyltransferase component of 2-oxoglutarate dehydrogenase complex, mitochondrial	Dlst	-0.811789	-0.880923	-0.791225	0.001072	0.010911	-0.827979	+
Q9CQ92	Mitochondrial fission 1 protein	Fis1	-0.761211	-0.942456	-0.790096	0.004543	0.018873	-0.831255	+
P43406	Integrin alpha-V;Integrin alpha-V heavy chain;Integrin alpha-V light chain	Itgav	-0.867609	-0.866125	-0.761675	0.001773	0.01274	-0.831803	+
Q3UUQ7	GPI inositol-deacylase	Pgap1	-0.784281	-0.960823	-0.75596	0.005858	0.021698	-0.833688	+
Q8CAY6	Acetyl-CoA acetyltransferase, cytosolic	Acat2;Acat3	-0.750337	-0.934441	-0.817228	0.004136	0.018077	-0.834002	+
E9QNX9	Tyrosine-protein kinase receptor;Insulin-like growth factor 1 receptor;Insulin-like growth factor 1 receptor alpha chain;Insulin-like growth factor 1 receptor beta chain	Igf1r	-0.705154	-0.874261	-0.924521	0.00626	0.022557	-0.834645	+
Q9D7S7	60S ribosomal protein L22-like 1	Rpl22l1	-0.975458	-0.711069	-0.821325	0.008308	0.026491	-0.835951	+
P28271	Cytoplasmic aconitate hydratase	Aco1	-0.776133	-0.957243	-0.778331	0.005098	0.020144	-0.837236	+
Q9QYB5	Gamma-adducin	Add3	-0.561276	-0.857757	-1.09867	0.032623	0.064002	-0.839235	+
Q9CZX9	ER membrane protein complex subunit 4	Emc4	-0.777641	-1.06559	-0.683316	0.018132	0.042865	-0.842181	+
Q6PD26	GPI transamidase component PIG-S	Pigs	-0.793256	-0.653895	-1.08811	0.02218	0.049287	-0.845086	+
Q7TMG8	Protein NipSnap homolog 2	Gbas	-0.842178	NA	-0.850682	0.003198	0.015919	-0.84643	+
P97742	Carnitine O-palmitoyltransferase 1, liver isoform	Cpt1a	-0.974994	-0.760004	-0.804436	0.005939	0.021859	-0.846478	+
Q9JHF5	V-type proton ATPase subunit a	Tcirg1	-0.960259	-0.775882	-0.805643	0.004519	0.018873	-0.847261	+
Q924B0	Inositol monophosphatase 1	Impa1	-0.866434	NA	-0.828737	0.014155	0.036841	-0.847585	+
Q9CQC9	GTP-binding protein SAR1b	Sar1b	-0.856566	NA	-0.844432	0.004541	0.018873	-0.850499	+
P08113	Endoplasmin	Hsp90b1	-0.856527	-0.932645	-0.763368	0.003293	0.016099	-0.850847	+
Q99KF1	Transmembrane emp24 domain-containing protein 9	Tmed9	-0.819232	NA	-0.886668	0.025153	0.053961	-0.85295	+
Q921I0	ORM1-like protein 1	Ormdl1;Gm28778	-0.809116	-1.06599	-0.68458	0.016883	0.041047	-0.853228	+
E9PYF4		Lmo7	-0.934264	-0.829968	-0.797582	0.002324	0.013943	-0.853938	+
P05202	Aspartate aminotransferase, mitochondrial	Got2	-0.846765	-0.912174	-0.805777	0.001311	0.0116	-0.854905	+
F6UIS1	Endoplasmic reticulum-Golgi intermediate compartment protein 3	Ergic3	-1.15641	-0.747228	-0.66604	0.029981	0.06041	-0.85656	+
Q8K212	Phosphofurin acidic cluster sorting protein 1	Pacs1	-0.842178	-0.829423	-0.900858	0.000657	0.009561	-0.857486	+
Q9WUL7	ADP-ribosylation factor-like protein 3	Arl3	-0.871531	NA	-0.844087	0.010183	0.030151	-0.857809	+
Q99N15	3-hydroxyacyl-CoA dehydrogenase type-2	Hsd17b10	-0.858433	NA	-0.862462	0.00149	0.011992	-0.860447	+
D3YVM8	Biogenesis of lysosome-related organelles complex 1 subunit 1	Bloc1s1	-0.643092	-0.91789	-1.02278	0.016842	0.041002	-0.861255	+
Q8VCH8	UBX domain-containing protein 4	Ubxn4	-0.606221	-0.893342	-1.08546	0.025135	0.053956	-0.861674	+
P42128	Forkhead box protein K1	Foxk1	-0.901534	-0.821976	-0.862776	0.000709	0.009668	-0.862095	+
Q8BKZ9	Pyruvate dehydrogenase protein X component, mitochondrial	Pdhx	-0.578868	-1.07647	-0.933142	0.028142	0.058126	-0.862826	+
P59999	Actin-related protein 2/3 complex subunit 4	Arpc4	-0.954839	-0.706021	-0.929775	0.008285	0.02646	-0.863545	+
Q62351	Transferrin receptor protein 1	Tfrc	-0.953051	-0.916114	-0.721505	0.006846	0.023611	-0.863557	+
Q99KC8	von Willebrand factor A domain-containing protein 5A	Vwa5a	-0.923231	-0.87117	-0.797382	0.001781	0.012779	-0.863927	+
Q8BXQ2	GPI transamidase component PIG-T	Pigt	-0.840178	-0.803475	-0.94943	0.002562	0.014442	-0.864361	+
P47955	60S acidic ribosomal protein P1	Rplp1;Gm10073	-0.588778	-0.840923	-1.16464	0.035194	0.067556	-0.86478	+
B1AQF4	Dual specificity protein phosphatase 3	Dusp3	-0.856683	NA	-0.875675	0.006979	0.023829	-0.866179	+
Q9R1R8	Retinol dehydrogenase 11	Rdh11	-0.89226	NA	-0.843984	0.017697	0.042156	-0.868122	+
E9QM90	LisH domain and HEAT repeat-containing protein KIAA1468	2310035C23Rik;Kiaa1468	-0.892977	-0.755107	-0.969957	0.005146	0.020249	-0.87268	+
Q61543	Golgi apparatus protein 1	Glg1	-0.837989	-0.924174	-0.863893	0.00085	0.010036	-0.875352	+
Q9JKV1	Proteasomal ubiquitin receptor ADRM1	Adrm1;Gm9774	-0.793814	-0.816999	-1.01788	0.006527	0.023073	-0.876231	+
P35831	Tyrosine-protein phosphatase non-receptor type 12	Ptpn12	-0.9341	-0.859879	-0.843812	0.000999	0.01051	-0.879264	+
P58854	Gamma-tubulin complex component 3	Tubgcp3	-0.754423	-0.842436	-1.04206	0.009228	0.028209	-0.879639	+
P61027	Ras-related protein Rab-10	Rab10	-0.661887	-1.23655	-0.748364	0.03874	0.071843	-0.882267	+
P83917	Chromobox protein homolog 1	Cbx1	-0.882412	NA	-0.889011	0.002372	0.014043	-0.885712	+
A2AG68	Copper-transporting ATPase 1	Atp7a	-0.697579	-0.991163	-0.968829	0.011157	0.031818	-0.885857	+
P61161	Actin-related protein 2	Actr2	-0.850167	-0.947849	-0.865255	0.001167	0.011123	-0.887757	+
Q99P72	Reticulon-4	Rtn4	-0.904745	-0.801467	-0.961898	0.002775	0.014901	-0.88937	+
F8WIU1	UPF0687 protein C20orf27 homolog	1700037H04Rik	-0.545242	-1.05315	-1.07576	0.03574	0.068095	-0.891384	+
Q5DTZ0	Protein NYNRIN	Nynrin	-1.16765	-0.904899	-0.603562	0.031792	0.06285	-0.892037	+
P97807	Fumarate hydratase, mitochondrial	Fh	-0.888679	-0.887758	-0.904913	3.9e-05	0.006763	-0.893783	+
E9Q6C7		Adgrl2	-0.867295	-0.97497	-0.845225	0.001996	0.013361	-0.89583	+
Q99K85	Phosphoserine aminotransferase	Psat1	-0.888122	-0.69744	-1.1025	0.016626	0.040614	-0.896021	+
A2A841	Protein 4.1	Epb4.1;Epb41	-0.727373	-0.70302	-1.25779	0.038464	0.071493	-0.896062	+
Q9JJ28	Protein flightless-1 homolog	Flii	-0.849548	-0.985226	-0.854182	0.002453	0.014148	-0.896319	+
P10518	Delta-aminolevulinic acid dehydratase	Alad	-0.802324	-1.09111	-0.796482	0.01156	0.032385	-0.896638	+
E9Q512		Trip11	-0.937303	-0.857201	NA	0.028398	0.05832	-0.897252	+
A2AH25	Rho GTPase-activating protein 1	Arhgap1	-0.79307	-1.01687	-0.885178	0.005185	0.020323	-0.898371	+
Q8CI75	DIS3-like exonuclease 2	Dis3l2	-0.830411	-0.983367	-0.882346	0.002487	0.014198	-0.898708	+
G8JL74	Polypyrimidine tract-binding protein 3	Ptbp3	-0.695527	-0.983063	-1.02743	0.013042	0.035052	-0.902007	+
Q921H8	3-ketoacyl-CoA thiolase A, peroxisomal	Acaa1a	-0.918881	-0.902853	-0.88926	9e-05	0.008336	-0.903665	+
Q9D091	GTPase NRas	Nras	-0.863463	NA	-0.944879	0.028643	0.058628	-0.904171	+
E9Q557	Desmoplakin	Dsp	-0.915881	-0.892737	NA	0.008146	0.026119	-0.904309	+
Q8BKG3	Inactive tyrosine-protein kinase 7	Ptk7	-0.848426	-0.880217	-0.984387	0.002055	0.013505	-0.904344	+
P14211	Calreticulin	Calr	-0.901454	-0.923737	-0.897887	7.9e-05	0.008336	-0.907693	+
P57716	Nicastrin	Ncstn	-0.674166	-1.00008	-1.05392	0.016596	0.040614	-0.909388	+
Q9R0E2	Procollagen-lysine,2-oxoglutarate 5-dioxygenase 1	Plod1	-0.792809	-0.998964	-0.938502	0.004489	0.018857	-0.910092	+
Q64010	Adapter molecule crk	Crk	-0.769019	-1.26855	-0.695634	0.036885	0.069439	-0.911066	+
Q9CVB6	Actin-related protein 2/3 complex subunit 2	Arpc2	-0.882689	-0.992995	-0.860091	0.002021	0.013398	-0.911925	+
O55028	[3-methyl-2-oxobutanoate dehydrogenase [lipoamide]] kinase, mitochondrial	Bckdk	-0.948942	-0.859218	-0.929812	0.000893	0.010036	-0.912657	+
Q8K1R7	Serine/threonine-protein kinase Nek9	Nek9	-0.89905	-0.841576	-0.998159	0.0025	0.014207	-0.912928	+
Q9JM76	Actin-related protein 2/3 complex subunit 3	Arpc3	-0.897209	-0.951555	-0.891644	0.000437	0.009029	-0.913469	+
D3YYT1	Putative oxidoreductase GLYR1	Glyr1	-1.04458	-1.13817	-0.560106	0.036312	0.068833	-0.914288	+
Q8CBY8	Dynactin subunit 4	Dctn4	-0.917745	-1.00569	-0.8198	0.003429	0.016526	-0.914412	+
D3Z7P3	Glutaminase kidney isoform, mitochondrial	Gls	-0.803523	-1.08711	-0.85439	0.008979	0.027749	-0.915007	+
Q505D7	Optic atrophy 3 protein homolog	Opa3	-0.967587	-0.957392	-0.824856	0.002506	0.014207	-0.916612	+
Q8C1B7	Septin-11	Sept11	-0.801389	-0.950701	-1.00369	0.004319	0.018445	-0.918593	+
D3YZZ5		Tmed7	-0.988561	-0.799029	-0.969092	0.004264	0.018398	-0.918894	+
P35235	Tyrosine-protein phosphatase non-receptor type 11	Ptpn11	-0.854119	-0.966098	-0.939937	0.001348	0.011716	-0.920051	+
Q6ZQ73	Cullin-associated NEDD8-dissociated protein 2	Cand2	-0.940801	-0.904037	-0.918922	0.000134	0.008573	-0.921254	+
A6PW84	Prolyl 3-hydroxylase 1	P3h1;Lepre1	-0.931027	-0.799796	-1.03681	0.005476	0.020887	-0.922545	+
Q6P549	Phosphatidylinositol 3,4,5-trisphosphate 5-phosphatase 2	Inppl1	-0.902778	-1.0266	-0.843399	0.003392	0.016396	-0.92426	+
Q80UJ7	Rab3 GTPase-activating protein catalytic subunit	Rab3gap1	-0.963772	-0.994447	-0.815944	0.003532	0.016643	-0.924721	+
Q99JY9	Actin-related protein 3	Actr3	-0.89961	-0.933854	-0.94189	0.000196	0.008631	-0.925118	+
Q58A65	C-Jun-amino-terminal kinase-interacting protein 4	Spag9	-0.909617	-0.988344	-0.884434	0.001137	0.01108	-0.927465	+
Q8CGA0	Protein phosphatase 1F	Ppm1f	-0.832971	-0.908136	-1.04518	0.004444	0.018764	-0.928763	+
B7ZNY3	Partitioning defective 3 homolog	Pard3	-0.820558	-0.964487	-1.01986	0.004012	0.01788	-0.93497	+
Q9QZE5	Coatomer subunit gamma-1	Copg1	-0.906797	-1.05116	-0.850751	0.004041	0.01788	-0.936237	+
E9Q1G8	Septin-7	Sept7	-0.894573	-0.989029	-0.926015	0.000878	0.010036	-0.936539	+
Q8BFZ9	Erlin-2	Erlin2	-0.830297	-1.04965	-0.933179	0.004535	0.018873	-0.937709	+
Q8VE73	Cullin-7	Cul7	-0.884353	-1.01311	-0.922228	0.001648	0.012455	-0.939895	+
E9Q3M3	Dynactin subunit 1	Dctn1	-0.903299	-1.04228	-0.874901	0.003012	0.01551	-0.940161	+
Q61771	Kinesin-like protein KIF3B;Kinesin-like protein KIF3B, N-terminally processed	Kif3b	-0.790246	-0.848469	-1.19617	0.017513	0.041938	-0.944961	+
F8VQE9	Arf-GAP with GTPase, ANK repeat and PH domain-containing protein 3	Agap3	-0.881582	NA	-1.02076	0.046493	0.08228	-0.95117	+
O35887	Calumenin	Calu	-0.966915	-0.936716	-0.958575	8.9e-05	0.008336	-0.954068	+
Q9R0P9	Ubiquitin carboxyl-terminal hydrolase isozyme L1	Uchl1	-1.01196	NA	-0.896708	0.038396	0.071457	-0.954336	+
P70195	Proteasome subunit beta type-7	Psmb7	-0.947161	NA	-0.965341	0.006051	0.022153	-0.956251	+
Q9QZB7	Actin-related protein 10	Actr10	-0.785168	-1.19709	-0.900178	0.015924	0.039631	-0.960811	+
P26443	Glutamate dehydrogenase 1, mitochondrial	Glud1	-1.07506	-1.00546	-0.805777	0.006963	0.023792	-0.962098	+
Q91V41	Ras-related protein Rab-14	Rab14	-0.784429	-1.28912	-0.820817	0.027218	0.056789	-0.964789	+
Q8VD75	Huntingtin-interacting protein 1	Hip1	-1.2069	-0.827481	-0.866444	0.015179	0.038463	-0.966943	+
P52196	Thiosulfate sulfurtransferase	Tst	-1.09308	-0.933121	-0.875323	0.004504	0.018873	-0.967175	+
Q14AX6	Cyclin-dependent kinase 12	Cdk12	-0.778598	-1.05634	-1.08444	0.00991	0.029622	-0.973126	+
Q9D1Q6	Endoplasmic reticulum resident protein 44	Erp44	-0.973855	-1.00596	-0.943365	0.000344	0.009029	-0.974393	+
O55106	Striatin	Strn	-0.898049	-1.0522	-0.977683	0.002073	0.013505	-0.975976	+
O08738	Caspase-6;Caspase-6 subunit p18;Caspase-6 subunit p11	Casp6	-1.04118	-0.727621	-1.16343	0.017179	0.041542	-0.97741	+
Q9CQ71	Replication protein A 14 kDa subunit	Rpa3	-1.05614	-0.590094	-1.28601	0.041177	0.075006	-0.977416	+
O70274	Protein tyrosine phosphatase type IVA 2;Protein tyrosine phosphatase type IVA 1	Ptp4a2;Ptp4a1	-1.33525	-0.608872	-0.989522	0.043065	0.077516	-0.97788	+
Q9CPZ6	ORM1-like protein 3	Ormdl3	-0.962893	-1.06937	-0.901611	0.002502	0.014207	-0.977956	+
P63005	Platelet-activating factor acetylhydrolase IB subunit alpha	Pafah1b1	-0.991033	-1.02317	-0.924739	0.000874	0.010036	-0.979647	+
P58021	Transmembrane 9 superfamily member 2	Tm9sf2	-0.96616	-1.05909	-0.913924	0.001872	0.013086	-0.979726	+
Q922F4	Tubulin beta-6 chain	Tubb6	-1.07018	-1.08915	-0.795282	0.009167	0.028098	-0.98487	+
O88851	Putative hydrolase RBBP9	Rbbp9	-0.937838	NA	-1.03555	0.031497	0.062386	-0.986695	+
Q8VDJ3	Vigilin	Hdlbp	-0.957671	-1.07874	-0.930104	0.002124	0.013729	-0.988837	+
E9QNY8	Sacsin	Sacs	-0.972591	-1.00588	NA	0.010711	0.031112	-0.989237	+
Q8K1Z0	Ubiquinone biosynthesis protein COQ9, mitochondrial	Coq9	-0.95738	NA	-1.02591	0.021988	0.04906	-0.991643	+
P42208	Septin-2	Sept2	-0.983034	-1.04727	-0.945913	0.000889	0.010036	-0.992073	+
P13020	Gelsolin	Gsn	-0.825191	-1.28416	-0.870333	0.020945	0.047387	-0.993229	+
Q91VE0	Long-chain fatty acid transport protein 4	Slc27a4	-1.04573	-1.20551	-0.737125	0.018517	0.04354	-0.996124	+
Q9DBS1	Transmembrane protein 43	Tmem43	-1.02847	-0.924647	-1.04309	0.001391	0.011875	-0.998733	+
E9Q5W5	Zinc finger ZZ-type and EF-hand domain-containing protein 1	Zzef1	-0.949689	-1.05319	NA	0.032869	0.064358	-1.00144	+
Q8BHC4	Dephospho-CoA kinase domain-containing protein	Dcakd	-0.945135	NA	-1.05923	0.036199	0.068712	-1.00218	+
Q8K0D7	Tail-anchored protein insertion receptor WRB	Wrb	-1.03994	NA	-0.965266	0.023697	0.051785	-1.0026	+
A2A6U3	Septin-9	Sept9	-0.939648	-1.04668	-1.0376	0.001153	0.011086	-1.00797	+
Q9ET30	Transmembrane 9 superfamily member 3	Tm9sf3	-0.908045	-1.18648	-0.934279	0.007641	0.025189	-1.0096	+
O88342	WD repeat-containing protein 1	Wdr1	-1.01157	-1.09972	-0.918668	0.002668	0.014715	-1.00999	+
Q9QZV9	NTF2-related export protein 1	Nxt1	-0.907964	-0.926652	-1.2049	0.008862	0.027495	-1.01317	+
D3YX85	Arf-GAP with SH3 domain, ANK repeat and PH domain-containing protein 2	Asap2	-1.45261	-0.700586	-0.886881	0.046354	0.08214	-1.01336	+
F7CVJ5		Ahnak2	-0.981634	-1.04699	NA	0.020504	0.046593	-1.01431	+
Q99LP6	GrpE protein homolog 1, mitochondrial	Grpel1	-0.939154	NA	-1.09027	0.047318	0.083283	-1.01471	+
P07356	Annexin A2;Annexin	Anxa2	-0.976768	-0.821298	-1.26723	0.015967	0.03969	-1.02177	+
A2A6A1	G patch domain-containing protein 8	Gpatch8	-1.01587	-1.02958	NA	0.004268	0.018398	-1.02272	+
Q9DBC7	cAMP-dependent protein kinase type I-alpha regulatory subunit;cAMP-dependent protein kinase type I-alpha regulatory subunit, N-terminally processed	Prkar1a	-1.04127	-1.01753	-1.01489	6.7e-05	0.008336	-1.02456	+
Q3UHP6	Ankyrin repeat and SAM domain-containing protein 1A	Anks1;Anks1a	-1.23079	-1.00058	-0.845363	0.011709	0.032668	-1.02558	+
Q9ER00	Syntaxin-12	Stx12	-0.708483	-1.32117	-1.05293	0.028514	0.058423	-1.02753	+
Q91YM2	Rho GTPase-activating protein 35	Arhgap35	-0.89681	-1.11169	-1.09072	0.004355	0.018561	-1.03307	+
A2BGN7	Protein MANBAL	Manbal	-1.03492	-0.984467	-1.08579	0.000798	0.010036	-1.03506	+
P53994	Ras-related protein Rab-2A	Rab2a	-1.0223	-1.06366	-1.02193	0.000179	0.008631	-1.03596	+
Q3UHH1	Zinc finger SWIM domain-containing protein 8	Zswim8	-1.11263	-0.959442	NA	0.046979	0.082862	-1.03604	+
E9Q474		Akap13	-1.10282	-0.97765	NA	0.038256	0.071237	-1.04024	+
Q9D3P8	Plasminogen receptor (KT)	Plgrkt	-0.922457	-1.24262	-0.956264	0.009393	0.028556	-1.04045	+
P61164	Alpha-centractin	Actr1a	-0.926369	-1.08377	-1.11296	0.003084	0.015646	-1.04103	+
Q9D2V7	Coronin-7	Coro7	-0.997962	-1.01729	-1.11421	0.001186	0.011245	-1.04315	+
Q80XQ2	TBC1 domain family member 5	Tbc1d5	-0.93369	-1.38012	-0.826285	0.025256	0.054043	-1.0467	+
O55022	Membrane-associated progesterone receptor component 1	Pgrmc1	-1.05075	NA	-1.04847	0.000691	0.009561	-1.04961	+
Q99KK2	N-acylneuraminate cytidylyltransferase	Cmas	-0.932993	-0.917056	-1.32702	0.015654	0.039256	-1.05902	+
Q3UI33	Methionine aminopeptidase 2	Metap2	-1.11128	-0.999846	-1.08172	0.000979	0.010385	-1.06428	+
A0A087WR24	alpha-1,2-Mannosidase;ER degradation-enhancing alpha-mannosidase-like protein 3	Edem3	-1.01361	-1.11959	-1.05991	0.00083	0.010036	-1.06437	+
E9QKZ2	Importin-9	Ipo9	-1.00885	-1.10726	-1.07794	0.00075	0.00996	-1.06469	+
Q8BFR4	N-acetylglucosamine-6-sulfatase	Gns	-1.09905	-1.01815	-1.0842	0.000542	0.009157	-1.06713	+
Q6P5E4	UDP-glucose:glycoprotein glucosyltransferase 1	Uggt1	-1.04135	-1.07764	-1.08298	0.00015	0.008573	-1.06732	+
Q8VCA8	Secernin-2	Scrn2	-0.990564	-1.18343	-1.03315	0.002981	0.015438	-1.06905	+
P59017	Bcl-2-like protein 13	Bcl2l13	-1.02134	-1.18744	-1.00154	0.00302	0.015522	-1.07011	+
Q9CR63	Cytochrome c oxidase assembly protein COX16 homolog, mitochondrial	Cox16	-0.996548	-1.15837	NA	0.047718	0.083752	-1.07746	+
P99027	60S acidic ribosomal protein P2	Rplp2	-0.802961	-1.18034	-1.25047	0.016217	0.039972	-1.07792	+
Q3UJP5	Protein C8orf37 homolog	2610301B20Rik	-1.00885	NA	-1.15119	0.041892	0.075904	-1.08002	+
Q3TCN2	Putative phospholipase B-like 2;Putative phospholipase B-like 2 28 kDa form;Putative phospholipase B-like 2 40 kDa form;Putative phospholipase B-like 2 15 kDa form	Plbd2	-1.0296	-1.06334	-1.15722	0.001239	0.011405	-1.08339	+
Q99K28	ADP-ribosylation factor GTPase-activating protein 2	Arfgap2	-0.969897	-1.1718	-1.11516	0.003053	0.015586	-1.08562	+
Q8CDK8	Prominin-1	Prom1	-0.886812	-1.37404	-1.0111	0.017491	0.041938	-1.09065	+
Q9CPW4	Actin-related protein 2/3 complex subunit 5	Arpc5	-1.12236	-1.06434	-1.09191	0.000235	0.008692	-1.09287	+
Q9DC23	DnaJ homolog subfamily C member 10	Dnajc10	-1.07023	-1.15777	-1.05891	0.000812	0.010036	-1.09564	+
Q69ZA1	Cyclin-dependent kinase 13	Cdk13	-0.866591	-1.28477	-1.14426	0.012279	0.033685	-1.09854	+
Q9DCT5	Stromal cell-derived factor 2	Sdf2	-1.15197	NA	-1.0457	0.03076	0.061431	-1.09883	+
Q4VAE3	Transmembrane protein 65	Tmem65	-1.20077	-0.908388	-1.19195	0.00753	0.024981	-1.10037	+
Q8BGZ6	Alpha-galactosidase A	Gla	-0.985837	-1.18299	-1.14481	0.002974	0.015438	-1.10455	+
Q9CQJ1	HIG1 domain family member 2A	Higd2a	-1.09345	-1.11875	NA	0.007283	0.02438	-1.1061	+
Q64727	Vinculin	Vcl	-1.1381	-1.09356	-1.09093	0.000191	0.008631	-1.10753	+
Q8C0E2	Vacuolar protein sorting-associated protein 26B	Vps26b	-0.831366	-0.973727	-1.52337	0.034311	0.066453	-1.10949	+
P27773	Protein disulfide-isomerase A3	Pdia3	-1.117	-1.1909	-1.02255	0.00192	0.013201	-1.11015	+
A2ATI9	Golgi reassembly-stacking protein 2	Gorasp2	-1.24497	-0.959032	-1.12861	0.005538	0.02101	-1.11087	+
Q8CE80	Calpastatin	Cast	-1.21316	-1.18853	-0.931421	0.006511	0.023069	-1.11104	+
Q8BFR1	Zinc finger CCCH-type antiviral protein 1-like	Zc3hav1l	-0.679829	-1.50291	-1.1526	0.04306	0.077516	-1.11178	+
E9PYN1	Cell adhesion molecule 1	Cadm1	-0.952594	-1.07521	-1.3106	0.008793	0.02738	-1.1128	+
I1E4X7	Diphosphoinositol polyphosphate phosphohydrolase 1	Nudt3	-1.04826	NA	-1.18108	0.037883	0.070798	-1.11467	+
P29595	NEDD8	Nedd8	-1.23558	-0.911127	-1.20512	0.008464	0.026887	-1.11728	+
D3YU12	NmrA-like family domain-containing protein 1	Nmral1	-0.826561	-1.52924	-0.997584	0.034006	0.065924	-1.1178	+
B0QZN5	Vesicle-associated membrane protein 2	Vamp2	-1.13952	-0.959218	-1.26419	0.006179	0.02238	-1.12098	+
Q8BMK4	Cytoskeleton-associated protein 4	Ckap4	-0.979686	-1.36176	-1.03217	0.011118	0.031776	-1.12454	+
Q9D0M5	Dynein light chain 2, cytoplasmic	Dynll2	-1.08673	-1.14346	-1.15704	0.000364	0.009029	-1.12908	+
Q8BY87	Ubiquitin carboxyl-terminal hydrolase 47	Usp47	-1.07641	-1.21119	-1.1096	0.001279	0.011573	-1.1324	+
Q9CQM2	ER lumen protein-retaining receptor 2	Kdelr2	-1.10116	-1.25809	-1.03902	0.003295	0.016099	-1.13276	+
O35226	26S proteasome non-ATPase regulatory subunit 4	Psmd4	-1.33644	-0.931986	-1.13029	0.010456	0.030651	-1.1329	+
Q9D6M3	Mitochondrial glutamate carrier 1	Slc25a22	-1.1677	-1.32987	-0.901719	0.011915	0.032951	-1.1331	+
Q5SNZ0	Girdin	Ccdc88a	-1.10324	-1.14367	-1.15957	0.000218	0.008687	-1.13549	+
Q9CQA6	Coiled-coil-helix-coiled-coil-helix domain-containing protein 1	Chchd1	-0.96168	-1.61468	-0.834029	0.042376	0.076578	-1.1368	+
Q6IRU2	Tropomyosin alpha-4 chain	Tpm4	-1.0967	NA	-1.18278	0.024028	0.052262	-1.13974	+
Q91ZA3	Propionyl-CoA carboxylase alpha chain, mitochondrial	Pcca	-1.2237	-1.08809	-1.10844	0.001369	0.011802	-1.14008	+
Q9Z0Y1	Dynactin subunit 3	Dctn3	-1.215	NA	-1.06641	0.041408	0.075294	-1.14071	+
Q61292	Laminin subunit beta-2	Lamb2	-0.904705	-1.11859	-1.40553	0.015735	0.039375	-1.14294	+
Q3UQ28	Peroxidasin homolog	Pxdn	-0.899971	-1.61821	-0.91595	0.040226	0.07386	-1.14471	+
Q8R146	Acylamino-acid-releasing enzyme	Apeh	-1.16876	-1.19792	-1.1039	0.000576	0.009157	-1.15686	+
Q8VHE0	Translocation protein SEC63 homolog	Sec63	-1.09689	-1.1327	-1.24427	0.001466	0.011992	-1.15795	+
P61514	60S ribosomal protein L37a	Rpl37a	-1.01131	-1.03342	-1.45712	0.015094	0.038405	-1.16729	+
E9QL12	Dysferlin	Dysf	-1.23654	-1.09865	NA	0.03755	0.070277	-1.1676	+
D3YZ62	Unconventional myosin-Va	Myo5a	-1.05017	-1.28814	-1.16541	0.003443	0.016526	-1.16791	+
Q91V01	Lysophospholipid acyltransferase 5	Lpcat3	-1.24797	-1.19792	-1.07095	0.002014	0.013386	-1.17228	+
P20029	78 kDa glucose-regulated protein	Hspa5	-1.20087	-1.1996	-1.12004	0.000519	0.009157	-1.1735	+
E9QMV2	Costars family protein ABRACL	Abracl	-1.06555	-1.29613	-1.16004	0.003234	0.015919	-1.1739	+
P14069	Protein S100-A6	S100a6	-1.1612	-1.41367	-0.947541	0.01291	0.034857	-1.17414	+
O89051	Integral membrane protein 2B;BRI2, membrane form;BRI2 intracellular domain;BRI2C, soluble form;Bri23 peptide	Itm2b	-1.11919	-1.41951	-0.994178	0.011292	0.032027	-1.17762	+
E9Q411		Nbas	-1.14992	-1.20782	NA	0.01563	0.039238	-1.17887	+
P70335	Rho-associated protein kinase 1	Rock1	-0.874126	-1.71339	-0.950468	0.047937	0.083967	-1.17933	+
Q791T5	Mitochondrial carrier homolog 1	Mtch1	-1.34051	-1.29316	-0.915661	0.012664	0.034481	-1.18311	+
Q9QZQ8	Core histone macro-H2A.1	H2afy	-1.61797	-1.17102	-0.770978	0.039968	0.073507	-1.18665	+
P51175	Protoporphyrinogen oxidase	Ppox	-1.15972	-1.19134	-1.20978	0.000152	0.008573	-1.18694	+
Q9WU28	Prefoldin subunit 5	Pfdn5	-1.10749	-1.38638	-1.07301	0.006891	0.023669	-1.18896	+
O55060	Thiopurine S-methyltransferase	Tpmt	-1.21401	NA	-1.16447	0.013259	0.03544	-1.18924	+
Q8CC88	von Willebrand factor A domain-containing protein 8	Vwa8	-1.02623	-1.20817	-1.35213	0.006163	0.022364	-1.19551	+
Q61142	Spindlin-1	Spin1	-1.29087	NA	-1.10687	0.048757	0.084931	-1.19887	+
O55057	Retinal rod rhodopsin-sensitive cGMP 3,5-cyclic phosphodiesterase subunit delta	Pde6d	-1.17263	-1.08984	-1.33678	0.003638	0.016929	-1.19975	+
P55096	ATP-binding cassette sub-family D member 3	Abcd3	-1.12559	-1.29429	-1.2088	0.001617	0.01244	-1.20956	+
Q9CS42	Ribose-phosphate pyrophosphokinase 2	Prps2	-1.14047	-1.02036	-1.46849	0.012034	0.033213	-1.20978	+
Q80WG5	Volume-regulated anion channel subunit LRRC8A	Lrrc8a	-1.04263	-1.20565	-1.38664	0.006656	0.02324	-1.21164	+
Q3UMW8	Ceroid-lipofuscinosis neuronal protein 5 homolog	Cln5	-0.932051	-1.35022	-1.35974	0.013223	0.035423	-1.21401	+
Q8C845	EF-hand domain-containing protein D2	Efhd2	-1.17393	NA	-1.25968	0.02242	0.049737	-1.2168	+
O09159	Lysosomal alpha-mannosidase	Man2b1	-1.2026	-1.26509	-1.18867	0.000371	0.009029	-1.21879	+
Q9WVD5	Mitochondrial ornithine transporter 1	Slc25a15	-1.29592	NA	-1.14291	0.03989	0.073462	-1.21941	+
A2AVJ7	Ribosome-binding protein 1	Rrbp1	-1.17437	-1.19436	-1.29014	0.000857	0.010036	-1.21962	+
D6RI20	Immediate early response 3-interacting protein 1	Hdhd2;Ier3ip1	-1.2816	-0.905043	-1.48414	0.01869	0.043829	-1.22359	+
F8VQ05		Fryl	-1.22255	-1.23019	NA	0.001983	0.013361	-1.22637	+
P09103	Protein disulfide-isomerase	P4hb	-1.21003	-1.428	-1.04947	0.00787	0.0256	-1.22917	+
Q9ES97	Reticulon-3	Rtn3	-1.12653	-1.41301	-1.17292	0.005107	0.020153	-1.23748	+
Q9Z2I9	Succinyl-CoA ligase [ADP-forming] subunit beta, mitochondrial	Sucla2	-0.688867	-1.45147	-1.57447	0.046569	0.082379	-1.23827	+
P48678	Prelamin-A/C;Lamin-A/C	Lmna	-1.21217	-1.17405	-1.33049	0.001442	0.011992	-1.2389	+
Q6GYP7	Ral GTPase-activating protein subunit alpha-1	Ralgapa1	-1.34067	-1.1509	NA	0.048395	0.084553	-1.24579	+
A0A087WS18	CLIP-associating protein 1	Clasp1	-1.2325	-1.25232	-1.25646	3.5e-05	0.006763	-1.2471	+
Q923D4	Splicing factor 3B subunit 5	Sf3b5	-1.25175	-1.20202	-1.29672	0.000478	0.009072	-1.25016	+
E9Q6R4		Arid1b	-1.06568	-1.00623	-1.68538	0.028772	0.058805	-1.25243	+
Q8VDP4	Cell cycle and apoptosis regulator protein 2	Ccar2	-1.16828	-1.30274	-1.29554	0.001208	0.01131	-1.25552	+
Q99PG2	Opioid growth factor receptor	Ogfr	-1.14303	-1.35267	-1.2806	0.002378	0.014043	-1.25876	+
P60605	Ubiquitin-conjugating enzyme E2 G2	Ube2g2	-0.993125	-1.18112	-1.60356	0.019933	0.045603	-1.25927	+
Q9DBL1	Short/branched chain specific acyl-CoA dehydrogenase, mitochondrial	Acadsb	-1.00954	-0.985872	-1.79985	0.04191	0.075904	-1.26509	+
Q8R1A4	Dedicator of cytokinesis protein 7	Dock7	-1.0844	-1.24362	-1.47035	0.007732	0.025376	-1.26613	+
Q8VI86	COMM domain-containing protein 1	Commd1;Gm28048	-1.19732	NA	-1.33717	0.035091	0.06746	-1.26725	+
Q99LR1	Monoacylglycerol lipase ABHD12	Abhd12	-1.27556	-1.48636	-1.06227	0.009098	0.027969	-1.27473	+
Q811J3	Iron-responsive element-binding protein 2	Ireb2	-1.40039	-1.42007	-1.00411	0.011108	0.031767	-1.27486	+
P50171	Estradiol 17-beta-dehydrogenase 8	Hsd17b8;H2-Ke6	-1.32558	NA	-1.24051	0.021099	0.047623	-1.28304	+
Q9ES74	Serine/threonine-protein kinase Nek7	Nek7	-1.27131	-1.01659	-1.58163	0.015667	0.039256	-1.28984	+
Q9CZH3	Proteasome assembly chaperone 3	Psmg3;Gm26938	-1.1705	-1.17093	-1.53339	0.008647	0.027152	-1.29161	+
Q3U9N4	Granulins;Acrogranin;Granulin-1;Granulin-2;Granulin-3;Granulin-4;Granulin-5;Granulin-6;Granulin-7	Grn	-1.08778	-1.49116	-1.31489	0.007995	0.025744	-1.29794	+
P18242	Cathepsin D	Ctsd	-1.31764	-1.24671	-1.33693	0.000445	0.009029	-1.30043	+
Q99020	Heterogeneous nuclear ribonucleoprotein A/B	Hnrnpab	-1.1613	-1.10606	-1.63689	0.016352	0.04025	-1.30142	+
Q91WS0	CDGSH iron-sulfur domain-containing protein 1	Cisd1	-1.28108	-1.2873	-1.33741	0.000188	0.008631	-1.30193	+
Q9DBN5	Lon protease homolog 2, peroxisomal	Lonp2	-1.3679	-1.39135	-1.15085	0.003432	0.016526	-1.30337	+
A2A7A7	GDH/6PGL endoplasmic bifunctional protein;Glucose 1-dehydrogenase;6-phosphogluconolactonase	H6pd	-1.43567	-1.30047	-1.18143	0.003148	0.015873	-1.30585	+
P54071	Isocitrate dehydrogenase [NADP], mitochondrial	Idh2	-1.2652	-1.20861	-1.4483	0.003047	0.015581	-1.30737	+
E9Q1S3	Protein transport protein Sec23A	Sec23a	-1.30512	-1.38447	-1.24951	0.000888	0.010036	-1.31304	+
P51807	Dynein light chain Tctex-type 1	Dynlt1	-1.68176	-1.23714	-1.02751	0.02083	0.04723	-1.31547	+
Q3TYS2	Uncharacterized protein C17orf62 homolog	BC017643	-1.09491	-1.82956	-1.03178	0.035693	0.06809	-1.31875	+
P97494	Glutamate--cysteine ligase catalytic subunit	Gclc	-1.84792	-0.807163	-1.30381	0.048154	0.084203	-1.31963	+
Q91V04	Translocating chain-associated membrane protein 1	Tram1	-1.28804	-1.50356	-1.1826	0.005045	0.020024	-1.32473	+
Q99KV1	DnaJ homolog subfamily B member 11	Dnajb11	-1.38933	-1.45921	-1.12874	0.005704	0.021357	-1.32576	+
D3YYU8	Obscurin-like protein 1	Obsl1	-1.32177	-1.43079	-1.22805	0.001944	0.0133	-1.32687	+
P51660	Peroxisomal multifunctional enzyme type 2;(3R)-hydroxyacyl-CoA dehydrogenase;Enoyl-CoA hydratase 2	Hsd17b4	-1.25078	-1.5053	-1.22966	0.004415	0.01866	-1.32858	+
P62876	DNA-directed RNA polymerases I, II, and III subunit RPABC5	Polr2l;Usp50	-1.23296	-1.12472	-1.63112	0.013145	0.035282	-1.3296	+
P18654	Ribosomal protein S6 kinase alpha-3	Rps6ka3	-1.1262	-1.48486	-1.38023	0.006346	0.022705	-1.33043	+
Q9D1P4	Cysteine and histidine-rich domain-containing protein 1	Chordc1	-1.62669	-1.54943	-0.841541	0.033085	0.064689	-1.33922	+
Q9JHP7	KDEL motif-containing protein 1	Kdelc1	-1.44487	-1.23795	NA	0.049005	0.085182	-1.34141	+
Q64310	Surfeit locus protein 4	Surf4	-1.32925	-1.46232	-1.24459	0.002211	0.013854	-1.34539	+
Q921C5	Protein bicaudal D homolog 2	Bicd2	-1.31086	-1.291	-1.44077	0.001213	0.01131	-1.34754	+
G3X928	SEC23-interacting protein	Sec23ip	-1.35603	-1.391	-1.30424	0.000348	0.009029	-1.35042	+
Q9JM14	5(3)-deoxyribonucleotidase, cytosolic type	Nt5c	-1.32144	NA	-1.39378	0.016956	0.041151	-1.35761	+
Q9DAK9	14 kDa phosphohistidine phosphatase	Phpt1	-1.31257	-1.37479	-1.39338	0.000323	0.009029	-1.36024	+
O55222	Integrin-linked protein kinase	Ilk	-1.27079	-1.45805	-1.35424	0.00158	0.012327	-1.36102	+
P61750	ADP-ribosylation factor 4	Arf4	-1.06245	-1.89691	-1.13564	0.036144	0.068641	-1.365	+
Q9JHI5	Isovaleryl-CoA dehydrogenase, mitochondrial	Ivd	-1.54781	-1.16172	-1.39071	0.00666	0.02324	-1.36675	+
Q8K2I4	Beta-mannosidase	Manba	-1.24639	-1.58583	-1.29413	0.005896	0.021784	-1.37545	+
Q8BXZ1	Protein disulfide-isomerase TMX3	Tmx3	-1.44359	-1.63414	-1.08123	0.013408	0.035638	-1.38632	+
Q9D0B5	Thiosulfate sulfurtransferase/rhodanese-like domain-containing protein 3	Tstd3	-1.49168	-0.961458	-1.70928	0.024674	0.053185	-1.38747	+
F6WHL0	Magnesium transporter protein 1	Magt1	-1.08527	-1.92439	-1.16671	0.034914	0.067272	-1.39212	+
Q8VCQ8		Cald1	-1.31235	-1.43738	-1.42926	0.00084	0.010036	-1.39299	+
P34022	Ran-specific GTPase-activating protein	Ranbp1	-1.54875	-0.968274	-1.66717	0.023144	0.050876	-1.39473	+
Q9R0Q6	Actin-related protein 2/3 complex subunit 1A	Arpc1a	-1.56823	-1.1646	-1.48725	0.007594	0.025104	-1.40669	+
A2ARP8	Microtubule-associated protein 1A;MAP1A heavy chain;MAP1 light chain LC2	Map1a	-1.42606	-1.28486	-1.51151	0.002197	0.013801	-1.40748	+
Q8BQ47	Protein canopy homolog 4	Cnpy4	-1.34748	NA	-1.46972	0.027604	0.057274	-1.4086	+
Q9D7P6	Iron-sulfur cluster assembly enzyme ISCU, mitochondrial	Iscu	-1.37958	-1.30715	-1.54119	0.002401	0.014056	-1.4093	+
Q9Z2G6	Protein sel-1 homolog 1	Sel1l	-1.33774	-1.40323	-1.49421	0.001031	0.010729	-1.41173	+
Q8JZX4	Splicing factor 45	Rbm17	-1.36419	-1.12577	-1.74672	0.016008	0.039719	-1.41223	+
O35242	Protein FAN	Nsmaf	-1.75312	-1.13868	-1.34743	0.015908	0.039614	-1.41308	+
P47199	Quinone oxidoreductase	Cryz	-0.857655	-1.40704	-1.98382	0.048876	0.085066	-1.41617	+
B2RXP1	Leucine-rich repeat and calponin homology domain-containing protein 3	Lrch3	-1.33162	-1.40582	-1.51561	0.001418	0.011992	-1.41769	+
Q9WTX2	Interferon-inducible double-stranded RNA-dependent protein kinase activator A	Prkra	-1.47684	-1.61556	-1.16714	0.008603	0.027069	-1.41985	+
O88712	C-terminal-binding protein 1	Ctbp1	-1.27717	-1.51755	-1.47702	0.002712	0.014782	-1.42391	+
Q80XL6	Acyl-CoA dehydrogenase family member 11	Acad11	-1.62981	-1.48068	-1.17387	0.008717	0.027267	-1.42812	+
Q99KH8	Serine/threonine-protein kinase 24;Serine/threonine-protein kinase 24 35 kDa subunit;Serine/threonine-protein kinase 24 12 kDa subunit	Stk24	-1.51763	-1.42728	-1.34023	0.001283	0.011573	-1.42838	+
G3X9Y5	Ubiquitin conjugation factor E4 A	Ube4a	-1.5212	-1.44013	-1.32832	0.001526	0.012134	-1.42988	+
Q9JKK1	Syntaxin-6	Stx6	-1.43231	NA	-1.42827	0.000897	0.010036	-1.43029	+
H3BL44	Calcium-transporting ATPase;Calcium-transporting ATPase type 2C member 1	Atp2c1	-1.52985	-1.33785	NA	0.042559	0.076876	-1.43385	+
F6ZGI7	Molybdopterin synthase sulfur carrier subunit	Mocs2	-1.43683	-1.38839	-1.49865	0.00049	0.009072	-1.44129	+
O54962	Barrier-to-autointegration factor;Barrier-to-autointegration factor, N-terminally processed	Banf1	-1.29724	-1.4079	-1.62323	0.004372	0.018584	-1.44279	+
Q08879	Fibulin-1	Fbln1	-1.41933	-1.55224	-1.3729	0.001374	0.011824	-1.44816	+
Q9EPL4	Methyltransferase-like protein 9	Mettl9	-1.54449	NA	-1.35881	0.04066	0.074395	-1.45165	+
O88844	Isocitrate dehydrogenase [NADP] cytoplasmic	Idh1	-1.43648	-1.51185	-1.41184	0.000428	0.009029	-1.45339	+
Q8BL66	Early endosome antigen 1	Eea1	-1.47666	-1.5059	-1.38388	0.000638	0.009522	-1.45548	+
Q3UJ81	Nuclear envelope phosphatase-regulatory subunit 1	Cnep1r1	-1.37484	NA	-1.54197	0.036439	0.069042	-1.4584	+
Q99MN9	Propionyl-CoA carboxylase beta chain, mitochondrial	Pccb	-1.95405	-1.13826	-1.28461	0.02837	0.05832	-1.45897	+
Q9D020	Cytosolic 5-nucleotidase 3A	Nt5c3a	-1.9141	-0.900559	-1.57727	0.03903	0.07225	-1.46398	+
Q9D8V7	Signal peptidase complex catalytic subunit SEC11C	Sec11c	-1.17961	-1.97682	-1.24096	0.029201	0.05953	-1.4658	+
Q8BKE6	Cytochrome P450 20A1	Cyp20a1	-1.48878	-1.67619	-1.25221	0.006869	0.023667	-1.47239	+
Q9CY50	Translocon-associated protein subunit alpha	Ssr1	-1.49876	-1.25461	-1.66564	0.006501	0.023069	-1.473	+
Q91V64	Isochorismatase domain-containing protein 1	Isoc1	-1.49422	NA	-1.45286	0.008933	0.027627	-1.47354	+
P52483	Ubiquitin-conjugating enzyme E2 E3	Ube2e3	-1.1927	-1.57647	-1.67389	0.009692	0.029141	-1.48102	+
E9QAN4	Kinesin-like protein;Kinesin-like protein KIF1A	Kif1a	-1.38764	-1.72946	-1.33339	0.006912	0.023697	-1.4835	+
P09671	Superoxide dismutase [Mn], mitochondrial	Sod2	-1.36778	-1.76241	-1.32722	0.008614	0.027069	-1.4858	+
Q8BMP6	Golgi resident protein GCP60	Acbd3	-1.4304	-1.5334	-1.50572	0.000426	0.009029	-1.48984	+
Q9D3B1	Very-long-chain (3R)-3-hydroxyacyl-CoA dehydratase 2	Hacd2	-1.4793	-1.58433	-1.41338	0.001111	0.011065	-1.49233	+
Q8CHT0	Delta-1-pyrroline-5-carboxylate dehydrogenase, mitochondrial	Aldh4a1	-1.57269	-1.61227	-1.3041	0.004159	0.018159	-1.49635	+
A2AQJ5	Transmembrane protein 87A	Tmem87a	-1.44616	-1.55326	-1.53784	0.000488	0.009072	-1.51242	+
Q8BLN5	Lanosterol synthase	Lss	-1.70382	-1.56252	-1.28718	0.006433	0.022898	-1.51784	+
P37040	NADPH--cytochrome P450 reductase	Por	-1.38747	-1.69999	-1.47392	0.003734	0.017157	-1.52046	+
Q8K1M3	cAMP-dependent protein kinase type II-alpha regulatory subunit	Prkar2a	-1.47172	-1.67957	-1.41383	0.002799	0.014901	-1.52171	+
Q9R1Z7	6-pyruvoyl tetrahydrobiopterin synthase	Pts	-1.98686	-1.17063	-1.41246	0.024332	0.052668	-1.52331	+
Q8BFZ3	Beta-actin-like protein 2	Actbl2	-1.48121	NA	-1.56825	0.018165	0.042887	-1.52473	+
P14152	Malate dehydrogenase, cytoplasmic	Mdh1	-1.56893	-1.48862	-1.5177	0.000237	0.008692	-1.52509	+
P54116	Erythrocyte band 7 integral membrane protein	Stom	-1.50125	NA	-1.55511	0.011217	0.031924	-1.52818	+
O70572	Sphingomyelin phosphodiesterase 2	Smpd2	-2.02654	-1.25219	-1.31618	0.025257	0.054043	-1.53164	+
Q80UM7	Mannosyl-oligosaccharide glucosidase	Mogs	-1.53165	-1.79247	-1.27831	0.009231	0.028209	-1.53414	+
Q6PIU9	Uncharacterized protein FLJ45252 homolog		-1.66559	-1.54243	-1.40491	0.002389	0.014056	-1.53765	+
Q9JKY5	Huntingtin-interacting protein 1-related protein	Hip1r	-1.42353	-1.75456	-1.43615	0.004921	0.019802	-1.53808	+
Q8VC30	Bifunctional ATP-dependent dihydroxyacetone kinase/FAD-AMP lyase (cyclizing);ATP-dependent dihydroxyacetone kinase;FAD-AMP lyase (cyclizing)	Dak	-1.52243	-1.27179	-1.84712	0.01139	0.032194	-1.54711	+
E9Q4Z2	Acetyl-CoA carboxylase 2;Biotin carboxylase	Acacb	-1.65948	-1.43738	NA	0.045579	0.081013	-1.54843	+
Q9DAS9	Guanine nucleotide-binding protein G(I)/G(S)/G(O) subunit gamma-12	Gng12	-1.2754	-1.79393	-1.57985	0.009293	0.028354	-1.54973	+
Q8BI84	Melanoma inhibitory activity protein 3	Mia3	-1.30358	-1.21688	-2.13813	0.03396	0.065896	-1.55286	+
E9Q9B7		Kidins220	-1.6382	-1.53925	-1.48419	0.00084	0.010036	-1.55388	+
Q9WV92	Band 4.1-like protein 3;Band 4.1-like protein 3, N-terminally processed	Epb41l3	-1.37072	-1.6416	-1.65249	0.003495	0.016638	-1.55494	+
A2CG63	AT-rich interactive domain-containing protein 4B	Arid4b	-1.78887	-1.43675	-1.45076	0.005409	0.02073	-1.55879	+
P16045	Galectin-1	Lgals1	-1.6131	-1.42779	-1.64551	0.001879	0.013086	-1.56214	+
Q9Z0L8	Gamma-glutamyl hydrolase	Ggh	-1.60185	-1.52764	NA	0.015093	0.038405	-1.56474	+
E9QNH7	Acyl-CoA-binding domain-containing protein 5	Acbd5	-1.59424	-1.87008	-1.23937	0.013286	0.035444	-1.5679	+
D3Z041	Long-chain-fatty-acid--CoA ligase 1	Acsl1	-1.50137	-1.48432	-1.73728	0.002678	0.01473	-1.57433	+
P97449	Aminopeptidase N	Anpep	-1.52379	-1.64532	-1.55539	0.000534	0.009157	-1.57483	+
A2AJI0	MAP7 domain-containing protein 1	Map7d1	-1.44844	-1.75968	-1.51726	0.003572	0.016714	-1.57513	+
Q9CZW4	Long-chain-fatty-acid--CoA ligase 3	Acsl3	-1.14878	-1.57687	-2.00277	0.023602	0.051632	-1.57614	+
P14869	60S acidic ribosomal protein P0	Rplp0	-1.53893	-1.59281	-1.60987	0.000183	0.008631	-1.58054	+
Q8BHZ0	Protein FAM49A	Fam49a	-1.5319	-1.76222	-1.45202	0.003437	0.016526	-1.58204	+
P11930	Nucleoside diphosphate-linked moiety X motif 19, mitochondrial	Nudt19	-1.87468	-1.54025	-1.35905	0.008887	0.027546	-1.59133	+
Q6NXL1		Sec24d	-1.82797	-1.47597	-1.47883	0.00533	0.020597	-1.59426	+
Q9JHJ0	Tropomodulin-3	Tmod3	-2.31326	-1.32222	-1.1486	0.048049	0.084054	-1.59469	+
Q9ES46	Beta-parvin	Parvb	-1.2235	-2.14975	-1.41563	0.029866	0.060293	-1.59629	+
P48962	ADP/ATP translocase 1	Slc25a4	-1.62755	-1.56054	-1.60543	0.000152	0.008573	-1.59784	+
Q8K4L3	Supervillin	Svil	-2.08154	-1.41485	-1.3058	0.022182	0.049287	-1.60073	+
Q8C3V4	Signal transducer and activator of transcription;Signal transducer and activator of transcription 1	Stat1	-1.51529	-1.79087	-1.49968	0.003467	0.016563	-1.60195	+
S4R291	Ankyrin-2	Ank2	-1.48211	-1.7643	-1.56336	0.002725	0.014782	-1.60326	+
Q07113	Cation-independent mannose-6-phosphate receptor	Igf2r	-1.60074	-1.67957	-1.53034	0.000722	0.009743	-1.60355	+
Q7JCX7	Cytochrome c oxidase subunit 3	mt-Co3	-1.64712	-1.5826	-1.59328	0.000154	0.008573	-1.60767	+
Q921I6	SH3 domain-binding protein 4	Sh3bp4	-1.58829	-1.78762	-1.45155	0.003657	0.016977	-1.60915	+
Q61578	NADPH:adrenodoxin oxidoreductase, mitochondrial	Fdxr	-1.84515	-1.64742	-1.34641	0.007984	0.025744	-1.61299	+
Q8R349	Cell division cycle protein 16 homolog	Cdc16	-1.79296	-1.62855	-1.4188	0.004473	0.018816	-1.61344	+
Q9MD59	NADH-ubiquinone oxidoreductase chain 2	mt-Nd2;Mtnd2	-0.917097	-2.1588	-1.76715	0.047871	0.083886	-1.61435	+
G5E8R3	Pyruvate carboxylase;Pyruvate carboxylase, mitochondrial	Pcx;Pc	-1.71147	-1.56933	-1.57081	0.000848	0.010036	-1.61721	+
Q8VHI3	GDP-fucose protein O-fucosyltransferase 2	Pofut2	-1.5126	-1.77234	-1.57389	0.002334	0.013969	-1.61961	+
Q6PHQ8	N-alpha-acetyltransferase 35, NatC auxiliary subunit	Naa35	-2.2861	-1.54483	-1.035	0.046664	0.082511	-1.62198	+
P62627	Dynein light chain roadblock-type 1	Dynlrb1	-1.1205	-1.39549	-2.35561	0.04926	0.085554	-1.62386	+
E9PXX7	Thioredoxin domain-containing protein 5	Txndc5	-1.55096	-1.74051	-1.58767	0.001271	0.011568	-1.62638	+
P51859	Hepatoma-derived growth factor	Hdgf	-1.36391	-1.84381	-1.67444	0.007373	0.024602	-1.62739	+
P14576	Signal recognition particle 54 kDa protein	Srp54	-1.82424	-1.63551	-1.4258	0.004956	0.019882	-1.62852	+
Q3UH59	Myosin-10	Myh10	-1.5164	-1.67442	-1.69622	0.001207	0.01131	-1.62901	+
Q9D1G1	Ras-related protein Rab-1B	Rab1b	-1.66206	NA	-1.61216	0.009701	0.029145	-1.63711	+
Q80YA7	Dipeptidyl peptidase 8	Dpp8	-1.83523	-1.24262	-1.84512	0.014418	0.037309	-1.64099	+
P60710	Actin, cytoplasmic 1;Actin, cytoplasmic 1, N-terminally processed	Actb	-1.54099	-1.62074	-1.82915	0.002656	0.014715	-1.66363	+
P84096	Rho-related GTP-binding protein RhoG	Rhog	-1.80244	-1.3229	-1.87818	0.010691	0.031112	-1.66784	+
P42125	Enoyl-CoA delta isomerase 1, mitochondrial	Eci1	-1.75493	NA	-1.59583	0.030206	0.060708	-1.67538	+
Q921N7	Transmembrane protein 70, mitochondrial	Tmem70	-1.61468	-1.91691	-1.50338	0.005375	0.020669	-1.67832	+
P35505	Fumarylacetoacetase	Fah	-1.94592	-1.76195	-1.33387	0.011439	0.032222	-1.68058	+
Q8VE47	Ubiquitin-like modifier-activating enzyme 5	Uba5	-2.3039	-1.65073	-1.10795	0.039503	0.072929	-1.68753	+
P08003	Protein disulfide-isomerase A4	Pdia4	-1.66716	-1.77391	-1.62619	0.000679	0.009561	-1.68909	+
Q8VD04	GRIP1-associated protein 1	Gripap1	-1.60544	-1.62458	-1.85571	0.002243	0.013943	-1.69524	+
Q9Z1Z2	Serine-threonine kinase receptor-associated protein	Strap	-1.76825	-1.66642	-1.65745	0.000438	0.009029	-1.69737	+
O55143	Sarcoplasmic/endoplasmic reticulum calcium ATPase 2;Calcium-transporting ATPase	Atp2a2	-1.77367	-1.53613	-1.78252	0.002252	0.013943	-1.69744	+
Q920A5	Retinoid-inducible serine carboxypeptidase	Scpep1	-1.80957	-1.45021	-1.83824	0.005353	0.020649	-1.69934	+
Q9QYC0	Alpha-adducin	Add1	-1.78591	-1.689	-1.62471	0.000759	0.009991	-1.69987	+
K3W4M4	ATP-dependent (S)-NAD(P)H-hydrate dehydratase	Carkd	-1.48049	-1.46693	-2.1594	0.01756	0.041972	-1.70227	+
F8WIT2	Annexin	Anxa6	-1.70138	-1.28439	-2.12492	0.01969	0.045287	-1.70357	+
Q9D104	Signal recognition particle 19 kDa protein	Srp19	-2.0468	-1.82418	-1.24014	0.019355	0.04475	-1.70371	+
Q6PF96	Electron transfer flavoprotein-ubiquinone oxidoreductase, mitochondrial	Etfdh	-1.78421	-1.07186	-2.25555	0.038438	0.071477	-1.70387	+
P28474	Alcohol dehydrogenase class-3	Adh5	-1.62815	-1.43654	-2.04824	0.011048	0.0317	-1.70431	+
A6H611	Mitochondrial intermediate peptidase	Mipep	-1.22928	-2.25415	-1.63982	0.029088	0.059333	-1.70775	+
P56382	ATP synthase subunit epsilon, mitochondrial	Atp5e	NA	-1.61756	-1.80689	0.035161	0.067524	-1.71222	+
G5E850	Cytochrome b5	Cyb5a	-1.90651	-1.60946	-1.63671	0.003033	0.015558	-1.71756	+
Q8R570	Synaptosomal-associated protein 47	Snap47	-1.21595	-1.54053	-2.4207	0.040846	0.074537	-1.72573	+
O54950	5-AMP-activated protein kinase subunit gamma-1	Prkag1	-1.67983	-2.03885	-1.4587	0.009459	0.02869	-1.72579	+
Q80XI4	Phosphatidylinositol 5-phosphate 4-kinase type-2 beta	Pip4k2b	-1.1534	-2.38794	-1.64713	0.040436	0.074118	-1.72949	+
Q9DBE0	Cysteine sulfinic acid decarboxylase	Csad	-1.9441	-1.86246	-1.38433	0.010027	0.029821	-1.7303	+
P63328	Serine/threonine-protein phosphatase 2B catalytic subunit alpha isoform	Ppp3ca	-1.59703	-1.92003	-1.67474	0.003148	0.015873	-1.7306	+
Q3UHJ0	AP2-associated protein kinase 1	Aak1	-1.82789	-1.81828	-1.54628	0.002832	0.01497	-1.73082	+
P19324	Serpin H1	Serpinh1	-1.59062	-1.92804	-1.68292	0.003355	0.016282	-1.73386	+
Q922R5	Serine/threonine-protein phosphatase 4 regulatory subunit 3B	Smek2	-2.15268	-1.07118	-1.97836	0.035403	0.067736	-1.73407	+
Q8BVA2	Transmembrane protein 222	Tmem222	-1.68555	-2.16834	-1.36315	0.017625	0.04204	-1.73901	+
Q3V4B5	COMM domain-containing protein 6	Commd6	-1.6701	-2.16335	-1.38513	0.016652	0.040653	-1.73953	+
P26350	Prothymosin alpha;Prothymosin alpha, N-terminally processed;Thymosin alpha	Ptma	-1.80964	-1.31954	-2.09101	0.016369	0.040251	-1.74006	+
P47809	Dual specificity mitogen-activated protein kinase kinase 4	Map2k4	-1.11528	-2.17673	-1.96849	0.032625	0.064002	-1.7535	+
Q8VEB4	Group XV phospholipase A2	Pla2g15	-2.3106	-1.60338	-1.35326	0.025638	0.054601	-1.75574	+
O89023	Tripeptidyl-peptidase 1	Tpp1	-1.96172	-1.71503	-1.59235	0.003802	0.017377	-1.75637	+
Q8BGT7	Survival of motor neuron-related-splicing factor 30	Smndc1	-1.67338	NA	-1.84147	0.030422	0.061023	-1.75743	+
Q3URU2	Paternally-expressed gene 3 protein	Peg3	-1.72226	-1.60636	-1.94628	0.003204	0.015919	-1.7583	+
P70665	Sialate O-acetylesterase;Sialate O-acetylesterase small subunit;Sialate O-acetylesterase large subunit	Siae	-1.65339	-1.86742	-1.7633	0.001229	0.011384	-1.76137	+
Q8R404	Protein QIL1	Qil1	-1.69476	-1.76052	-1.84078	0.000572	0.009157	-1.76536	+
P48381	Transcription factor RFX3	Rfx3	-1.60276	-1.62908	-2.06813	0.00722	0.024247	-1.76666	+
Q9R1T4	Septin-6	Sept6	-1.9408	-1.5779	-1.79106	0.00352	0.016643	-1.76992	+
Q9CPN8	Insulin-like growth factor 2 mRNA-binding protein 3	Igf2bp3	-1.60094	-2.02606	-1.69002	0.005292	0.020526	-1.77234	+
Q9WV98	Mitochondrial import inner membrane translocase subunit Tim9	Timm9	-1.65096	-2.06526	-1.61146	0.006613	0.023209	-1.77589	+
P15105	Glutamine synthetase	Glul	-1.81689	-2.02114	-1.53411	0.00616	0.022364	-1.79071	+
Q5UE59	Kinesin light chain 1	Klc1	-1.61363	-1.98272	-1.78933	0.003507	0.016643	-1.79523	+
Q6PDI5	Proteasome-associated protein ECM29 homolog	Ecm29;AI314180	-1.66668	-2.00088	-1.73524	0.003187	0.015919	-1.80094	+
Q9WUQ2	Prolactin regulatory element-binding protein	Preb	-2.01834	-1.50825	-1.91194	0.007265	0.024339	-1.81284	+
Q91VK4	Integral membrane protein 2C;CT-BRI3	Itm2c	-2.03523	-1.93874	-1.52431	0.007233	0.024251	-1.83276	+
A2AMC3	GDP-fucose protein O-fucosyltransferase 1	Pofut1	-1.80124	-1.78471	-1.9231	0.000564	0.009157	-1.83635	+
Q8R2Y2	Cell surface glycoprotein MUC18	Mcam	-1.70852	-1.82833	-1.97376	0.001738	0.01265	-1.83687	+
E9Q912		Rap1gds1	-1.73972	-2.06623	-1.72353	0.003648	0.016956	-1.84316	+
D3Z442	Mth938 domain-containing protein	Aamdc	-1.8698	-1.55438	-2.12425	0.007849	0.025564	-1.84948	+
Q9DCT8	Cysteine-rich protein 2	Crip2	-1.91264	-1.70443	-1.94193	0.001624	0.012451	-1.853	+
Q9MD68	Cytochrome c oxidase subunit 1	mt-Co1;Mtco1	-1.57091	-1.90328	-2.08603	0.006553	0.023128	-1.85341	+
P42227	Signal transducer and activator of transcription 3;Signal transducer and activator of transcription	Stat3	-1.83117	-1.80167	-1.93663	0.000487	0.009072	-1.85649	+
Q8BH80	Vesicle-associated membrane protein-associated protein B	Vapb	-2.21471	-2.02833	-1.33214	0.020253	0.046126	-1.85839	+
P58044	Isopentenyl-diphosphate Delta-isomerase 1	Idi1	-1.94097	NA	-1.77626	0.02819	0.058128	-1.85861	+
D3Z136	Elongation of very long chain fatty acids protein;Elongation of very long chain fatty acids protein 5	Elovl5	-2.08081	-1.98295	-1.56649	0.006985	0.02383	-1.87675	+
Q9DC50	Peroxisomal carnitine O-octanoyltransferase	Crot	-1.50545	-1.5982	-2.60584	0.03261	0.064002	-1.90316	+
Q61941	NAD(P) transhydrogenase, mitochondrial	Nnt	-1.95355	-1.80508	-1.95422	0.000678	0.009561	-1.90428	+
P27046	Alpha-mannosidase 2	Man2a1	-1.9394	-1.97931	-1.79525	0.00086	0.010036	-1.90465	+
Q62165	Dystroglycan;Alpha-dystroglycan;Beta-dystroglycan	Dag1	-1.79013	-1.74932	-2.17483	0.005026	0.020014	-1.90476	+
Q80SZ7	Guanine nucleotide-binding protein G(I)/G(S)/G(O) subunit gamma-5	Gng5	-1.88036	-1.98758	-1.87149	0.00038	0.009029	-1.91314	+
Q920Q6	RNA-binding protein Musashi homolog 2	Msi2	-2.10943	-1.513	-2.11766	0.010771	0.031173	-1.91336	+
Q9JM62	Receptor expression-enhancing protein 6	Reep6	-2.07266	-1.75773	-1.91035	0.00225	0.013943	-1.91358	+
P43883	Perilipin-2	Plin2	-1.82432	-1.92236	-1.99778	0.000687	0.009561	-1.91482	+
Q8CFV9	Riboflavin kinase	Rfk	-1.7171	-2.09405	-1.93641	0.003239	0.015919	-1.91585	+
A2AKH7	Leucine-rich repeat-containing protein 57	Lrrc57	-2.06438	NA	-1.77193	0.048437	0.084554	-1.91815	+
P50543	Protein S100-A11	S100a11	-2.07311	-1.71528	-1.99128	0.003142	0.015873	-1.92656	+
O08601	Microsomal triglyceride transfer protein large subunit	Mttp	-1.85427	-2.40847	-1.5171	0.017709	0.042156	-1.92661	+
Q8R5J9	PRA1 family protein 3	Arl6ip5	-1.85777	-1.9209	-2.04198	0.000775	0.009991	-1.94022	+
H7BWX9	Small ubiquitin-related modifier 2	Sumo2;Sumo3	-1.74547	-2.18447	-1.89207	0.004392	0.018618	-1.94067	+
O08997	Copper transport protein ATOX1	Atox1	-2.30857	-1.44477	-2.10316	0.017349	0.04176	-1.95217	+
Q8BH97	Reticulocalbin-3	Rcn3	-1.89362	-2.07065	-1.90617	0.000848	0.010036	-1.95681	+
H3BL81	Chromosome transmission fidelity protein 8 homolog	Chtf8	-2.2172	-1.60601	-2.05508	0.008592	0.027067	-1.95943	+
I3ITR1	Iron-sulfur cluster assembly 1 homolog, mitochondrial	AK157302;Isca1	-1.91426	-1.69098	-2.28761	0.007759	0.025376	-1.96428	+
Z4YKC4	Eukaryotic translation initiation factor 4 gamma 3	Eif4g3	-1.95605	-2.11376	-1.85169	0.001486	0.011992	-1.97383	+
A3KFU5	Polyadenylate-binding protein	Pabpc4;Gm10110	-1.88463	-1.95486	-2.09133	0.000941	0.010108	-1.97694	+
Q8BH69	Selenide, water dikinase 1	Sephs1	-2.12059	-1.9408	-1.90272	0.00114	0.011086	-1.98804	+
Q8CBM2	Aspartyl/asparaginyl beta-hydroxylase	Asph	-1.99796	-2.0383	-1.94126	0.000199	0.008631	-1.99251	+
Q9EQH2	Endoplasmic reticulum aminopeptidase 1	Erap1	-1.91994	-2.17379	-1.89514	0.001983	0.013361	-1.99629	+
Q8K2Q7	BRO1 domain-containing protein BROX	Brox	-2.13673	-2.2484	-1.61604	0.009356	0.028485	-2.00039	+
Q61335	B-cell receptor-associated protein 31	Bcap31	-1.89761	NA	-2.11367	0.034257	0.066379	-2.00564	+
Q7JCY6	NADH-ubiquinone oxidoreductase chain 4	mt-Nd4;Mtnd4	-2.15326	-1.85363	-2.01986	0.001856	0.01308	-2.00891	+
F6UR10		Spcs1	-2.08664	-2.12193	-1.82533	0.002156	0.013801	-2.0113	+
Q9WVL0	Maleylacetoacetate isomerase	Gstz1	-1.89601	NA	-2.13686	0.037975	0.07084	-2.01643	+
P61458	Pterin-4-alpha-carbinolamine dehydratase	Pcbd1	-1.96072	-2.40684	-1.68829	0.010594	0.030901	-2.01861	+
Q78JW9	Ubiquitin domain-containing protein UBFD1	Ubfd1	-2.13475	-2.65816	-1.28167	0.037077	0.069674	-2.02486	+
Q8CJH3	Plexin-B1	Plxnb1	-1.33335	-2.50819	-2.24414	0.029423	0.059719	-2.02856	+
Q9CWF2	Tubulin beta-2B chain	Tubb2b	-1.88423	-2.21532	-1.99893	0.002272	0.013943	-2.03283	+
Q9CQV6	Microtubule-associated proteins 1A/1B light chain 3B	Map1lc3b	-2.01634	-2.06029	-2.03308	4e-05	0.006763	-2.03657	+
O88455	7-dehydrocholesterol reductase	Dhcr7	-1.93841	-2.20467	-1.97647	0.001657	0.012455	-2.03985	+
Q91YW3	DnaJ homolog subfamily C member 3	Dnajc3	-2.12536	-1.99751	-2.02243	0.000365	0.009029	-2.04843	+
O35623	BET1 homolog	Bet1	-2.08855	-2.01795	-2.05843	9.9e-05	0.008469	-2.05498	+
Q9CR80	Protein FAM32A	Fam32a	-1.91256	-2.20538	NA	0.045192	0.080464	-2.05897	+
Q8BSN6	Vesicle-associated membrane protein 4	Vamp4	-2.59645	-1.67871	-1.90229	0.017532	0.041948	-2.05915	+
Q99JY0	Trifunctional enzyme subunit beta, mitochondrial;3-ketoacyl-CoA thiolase	Hadhb	-2.11649	-2.12026	-1.96999	0.000571	0.009157	-2.06891	+
P11438	Lysosome-associated membrane glycoprotein 1	Lamp1	-1.80844	-2.49148	-1.91093	0.010388	0.030495	-2.07028	+
Q64433	10 kDa heat shock protein, mitochondrial	Hspe1	-2.20924	-2.09832	-1.90459	0.001843	0.013063	-2.07071	+
P61961	Ubiquitin-fold modifier 1	Ufm1	-2.511	-2.05247	-1.65117	0.014075	0.036676	-2.07155	+
Q8R5C5	Beta-centractin	Actr1b	-1.45785	-2.18073	-2.57693	0.024103	0.052348	-2.07183	+
Q9JIX0	Transcription and mRNA export factor ENY2	Eny2	-1.89258	-2.33007	-1.99609	0.004031	0.01788	-2.07291	+
Q8BMS1	Trifunctional enzyme subunit alpha, mitochondrial;Long-chain enoyl-CoA hydratase;Long chain 3-hydroxyacyl-CoA dehydrogenase	Hadha	-1.99565	-2.10598	-2.11833	0.000354	0.009029	-2.07332	+
Q9DBE8	Alpha-1,3/1,6-mannosyltransferase ALG2	Alg2	-2.0548	-2.16447	-2.00177	0.000533	0.009157	-2.07368	+
Q8BWT1	3-ketoacyl-CoA thiolase, mitochondrial	Acaa2	-2.15603	-2.07776	-1.99166	0.000523	0.009157	-2.07515	+
P17439	Glucosylceramidase	Gba	-1.80588	-1.91286	-2.5166	0.011142	0.031801	-2.07845	+
O35900	U6 snRNA-associated Sm-like protein LSm2	Lsm2	-2.06474	-1.84774	-2.33407	0.004533	0.018873	-2.08218	+
P48036	Annexin A5	Anxa5	-2.01227	-2.17309	-2.07523	0.000502	0.009072	-2.08686	+
P14873	Microtubule-associated protein 1B;MAP1B heavy chain;MAP1 light chain LC1	Map1b	-2.01869	-2.06727	-2.20849	0.000735	0.009829	-2.09815	+
Q9WTP7	GTP:AMP phosphotransferase AK3, mitochondrial	Ak3	-1.95297	NA	-2.24386	0.044056	0.07892	-2.09842	+
Q9DBG7	Signal recognition particle receptor subunit alpha	Srpr	-1.58926	-2.76235	-1.95095	0.02619	0.05529	-2.10085	+
Q5SW88		Rab1	-2.02978	NA	-2.18526	0.023473	0.051459	-2.10752	+
P61080	Ubiquitin-conjugating enzyme E2 D1	Ube2d1	-2.06914	-2.15384	NA	0.012766	0.034606	-2.11149	+
O88196	E3 ubiquitin-protein ligase TTC3	Ttc3	-1.97702	-2.25773	NA	0.042137	0.076215	-2.11737	+
Q61025	Intraflagellar transport protein 20 homolog	Ift20	-2.05017	-2.12335	-2.20654	0.000451	0.009029	-2.12669	+
Q9CQF9	Prenylcysteine oxidase	Pcyox1	-2.18171	-2.29434	-1.91678	0.002746	0.014812	-2.13094	+
Q8CG03	cGMP-specific 3,5-cyclic phosphodiesterase	Pde5a	-2.10287	-1.63676	-2.65975	0.018679	0.043829	-2.13313	+
Q9D8W7	OCIA domain-containing protein 2	Ociad2	-1.79512	-1.61709	-2.99062	0.038486	0.071501	-2.13428	+
Q8CI51	PDZ and LIM domain protein 5	Pdlim5	-1.97154	-2.08735	-2.35502	0.002809	0.014935	-2.13797	+
Q9D7J4	Cytochrome c oxidase protein 20 homolog	Cox20	-2.05293	-2.02817	-2.33707	0.002139	0.013801	-2.13939	+
P48722	Heat shock 70 kDa protein 4L	Hspa4l	-2.04122	-2.18021	-2.20221	0.000554	0.009157	-2.14121	+
Q91Z31	Polypyrimidine tract-binding protein 2	Ptbp2	-3.07731	-1.57773	-1.7845	0.04461	0.079645	-2.14651	+
P15864	Histone H1.2	Hist1h1c	-2.26954	-1.92468	-2.27343	0.002863	0.015084	-2.15589	+
Q9CQP0	39S ribosomal protein L33, mitochondrial	Mrpl33	-2.26005	-2.27424	-1.93677	0.0026	0.014557	-2.15702	+
Q922J3	CAP-Gly domain-containing linker protein 1	Clip1	-1.84322	-2.23768	-2.43412	0.00634	0.022704	-2.17167	+
Q8BYK6	YTH domain-containing family protein 3	Ythdf3	-1.78939	-2.42527	-2.31303	0.008012	0.025771	-2.1759	+
Q6TEK5	Vitamin K epoxide reductase complex subunit 1-like protein 1	Vkorc1l1	-2.28118	NA	-2.07766	0.029704	0.060081	-2.17942	+
O08848	60 kDa SS-A/Ro ribonucleoprotein	Trove2	-2.14849	-1.49348	-2.92548	0.033935	0.065896	-2.18915	+
G3UZY2	Thioredoxin, mitochondrial	Txn2	-2.30528	-2.71032	-1.5628	0.022683	0.050185	-2.1928	+
P84089	Enhancer of rudimentary homolog	Erh	-2.09313	-2.06711	-2.41947	0.002661	0.014715	-2.19324	+
Q6P5F6	Zinc transporter ZIP10	Slc39a10	-1.81855	-1.98037	-2.79465	0.018366	0.043318	-2.19786	+
Q9ER67		Maged2	-2.20141	-2.00157	-2.39787	0.002692	0.014752	-2.20029	+
Q99L04	Dehydrogenase/reductase SDR family member 1	Dhrs1	-2.16418	-2.15453	-2.28349	0.000355	0.009029	-2.20073	+
O54790	Transcription factor MafG	Mafg	-2.88703	-1.23195	-2.512	0.047733	0.083752	-2.21032	+
Q9D023	Mitochondrial pyruvate carrier 2	Mpc2	-2.19698	-2.27684	-2.1705	0.000208	0.008631	-2.21477	+
O08529	Calpain-2 catalytic subunit	Capn2	-2.14545	-2.42506	-2.07483	0.002322	0.013943	-2.21511	+
O89001	Carboxypeptidase D	Cpd	-2.08664	-2.24212	-2.32529	0.000993	0.010474	-2.21802	+
Q9D881	Cytochrome c oxidase subunit 5B, mitochondrial	Cox5b	-2.3003	-2.15239	-2.21249	0.000373	0.009029	-2.22173	+
Q04690	Neurofibromin	Nf1	-2.09734	-2.34685	NA	0.035704	0.06809	-2.2221	+
D5MCW4	Protein CutA	Cuta	-2.14849	-2.58197	-1.94089	0.007135	0.024097	-2.22379	+
Q922Q1	Mitochondrial amidoxime reducing component 2	Marc2	-2.22842	-2.13813	-2.31628	0.000533	0.009157	-2.22761	+
Q6NZB0	DnaJ homolog subfamily C member 8	Dnajc8	-2.27348	-2.25059	-2.16636	0.000213	0.008687	-2.23014	+
Q80W54	CAAX prenyl protease 1 homolog	Zmpste24	-2.03663	-2.60501	-2.05149	0.006955	0.023792	-2.23105	+
Q9CQI3	Glia maturation factor beta	Gmfb	-2.06779	-2.46571	-2.18169	0.002782	0.014901	-2.2384	+
A0A087WQH8		Slc35a4	-2.2232	-2.26223	NA	0.005539	0.02101	-2.24272	+
P18760	Cofilin-1	Cfl1	-2.33389	-2.11692	-2.2971	0.000887	0.010036	-2.24931	+
Q921J2	GTP-binding protein Rheb	Rheb	-2.19216	-2.60677	-1.99265	0.006323	0.02267	-2.26386	+
Q8QZS1	3-hydroxyisobutyryl-CoA hydrolase, mitochondrial	Hibch	-2.69936	-1.91684	-2.21471	0.009881	0.029577	-2.27697	+
Q61474	RNA-binding protein Musashi homolog 1	Msi1	-1.83868	-2.58266	-2.4204	0.009666	0.029105	-2.28058	+
Q91WN1	DnaJ homolog subfamily C member 9	Dnajc9	-2.44745	-2.19656	-2.19815	0.001333	0.011647	-2.28072	+
P16332	Methylmalonyl-CoA mutase, mitochondrial	Mut	-1.57602	-2.2404	-3.04935	0.032945	0.064476	-2.28859	+
Q3THW5	Histone H2A.V;Histone H2A.Z;Histone H2A	H2afv;H2afz	-2.21521	-2.28673	-2.37609	0.000412	0.009029	-2.29268	+
Q9D7N6	39S ribosomal protein L30, mitochondrial	Mrpl30	-2.88477	-1.69104	-2.31037	0.021814	0.048839	-2.29539	+
Q78XF5	Oligosaccharyltransferase complex subunit OSTC	Ostc	-2.23175	-2.32612	-2.33969	0.000218	0.008687	-2.29919	+
P62751	60S ribosomal protein L23a	Rpl23a	-2.49809	-2.11567	-2.29786	0.00229	0.013943	-2.30387	+
Q06185	ATP synthase subunit e, mitochondrial	Atp5i;Atp5k	-2.44991	-2.35233	-2.12342	0.001752	0.012704	-2.30855	+
Q9D1R9	60S ribosomal protein L34	Rpl34	-2.15804	-2.46169	-2.33591	0.00144	0.011992	-2.31854	+
Q9D379	Epoxide hydrolase 1	Ephx1	-2.48421	-2.35252	-2.14066	0.001846	0.013063	-2.3258	+
P68369	Tubulin alpha-1A chain	Tuba1a	-2.20132	-2.55828	-2.24277	0.002324	0.013943	-2.33412	+
Q9CXU0	Mediator of RNA polymerase II transcription subunit 10	Med10	-2.25482	-2.42981	NA	0.023769	0.051915	-2.34231	+
O88508	DNA (cytosine-5)-methyltransferase 3A	Dnmt3a	-2.14326	-1.81005	-3.07858	0.025251	0.054043	-2.34397	+
H7BX26	Centrosomal protein of 170 kDa	Cep170	-2.03646	-2.40562	-2.59281	0.004823	0.019598	-2.34496	+
Q6P1J1	Dihydropyrimidinase-related protein 1	Crmp1	-2.53519	-2.35419	-2.17188	0.001979	0.013361	-2.35376	+
Q99K23	Ufm1-specific protease 2	Ufsp2	-2.43637	-2.27146	NA	0.02229	0.049502	-2.35392	+
Q3UGX2	Spectrin beta chain, erythrocytic	Sptb	-2.48229	-2.24067	NA	0.03254	0.063928	-2.36148	+
Q3UKC1	Tax1-binding protein 1 homolog	Tax1bp1	-2.02278	-1.87838	-3.19375	0.029641	0.059983	-2.36497	+
Q3UD01	Putative ataxin-7-like protein 3B	Atxn7l3b	-2.35867	-2.30738	-2.43039	0.000227	0.008692	-2.36548	+
Q61206	Platelet-activating factor acetylhydrolase IB subunit beta	Pafah1b2	-2.159	-2.5559	-2.40832	0.002371	0.014043	-2.37441	+
Q5SVI9	Calcium/calmodulin-dependent protein kinase type II subunit beta	Camk2b	-2.75641	-2.67877	-1.69126	0.020201	0.046033	-2.37548	+
Q9CQU5	ZW10 interactor	Zwint	-2.39152	NA	-2.35964	0.004271	0.018398	-2.37558	+
P97315	Cysteine and glycine-rich protein 1	Csrp1	-2.91535	-2.23371	-1.98891	0.0133	0.035444	-2.37932	+
Q3UID0	SWI/SNF complex subunit SMARCC2	Smarcc2	-2.30698	-2.52466	-2.33407	0.000821	0.010036	-2.38857	+
O55137	Acyl-coenzyme A thioesterase 1	Acot1	-2.2211	-2.56462	-2.38078	0.001722	0.012613	-2.38883	+
E9Q705	BolA-like protein 3	Bola3	-2.1958	-2.04359	-2.95261	0.013471	0.035728	-2.39733	+
Q7TNS2	MICOS complex subunit Mic10	Minos1	-1.71442	-2.53841	-2.94123	0.021925	0.048981	-2.39802	+
Q8K2C9	Very-long-chain (3R)-3-hydroxyacyl-CoA dehydratase 3	Hacd3	-2.26057	-2.48545	-2.4506	0.000848	0.010036	-2.39887	+
Q62523	Zyxin	Zyx	-2.69852	-3.07556	-1.43718	0.039945	0.073507	-2.40376	+
Q923T9	Calcium/calmodulin-dependent protein kinase type II subunit gamma	Camk2g	-2.4505	-2.83427	-1.92915	0.011689	0.03264	-2.40464	+
Q9CQN7	39S ribosomal protein L41, mitochondrial	Mrpl41;Gm6434	-2.23003	-2.2265	-2.78841	0.005925	0.021826	-2.41498	+
Q9CPQ8	ATP synthase subunit g, mitochondrial	Atp5l	-2.47201	-2.47549	-2.31857	0.000456	0.009029	-2.42203	+
P12265	Beta-glucuronidase	Gusb	-2.33845	-2.33567	-2.61839	0.001485	0.011992	-2.43084	+
Q9D7N9	Adipocyte plasma membrane-associated protein	Apmap	-3.45273	-2.0028	-1.8392	0.041705	0.075634	-2.43158	+
P60824	Cold-inducible RNA-binding protein	Cirbp	-3.12485	-1.63563	-2.5364	0.030266	0.060799	-2.43229	+
Q91ZJ5	UTP--glucose-1-phosphate uridylyltransferase	Ugp2	-2.11556	-1.95799	-3.23066	0.026014	0.055145	-2.43473	+
Q9Z1P6	NADH dehydrogenase [ubiquinone] 1 alpha subcomplex subunit 7	Ndufa7	-2.19718	-2.44571	-2.66875	0.003108	0.015749	-2.43721	+
Q9DAM7	Transmembrane protein 263	Tmem263	-2.53109	-2.29283	-2.48962	0.000908	0.010036	-2.43785	+
Q9D517	1-acyl-sn-glycerol-3-phosphate acyltransferase gamma	Agpat3	-2.83926	-2.75132	-1.74447	0.020014	0.045707	-2.44502	+
P51174	Long-chain specific acyl-CoA dehydrogenase, mitochondrial	Acadl	-2.51468	-2.49818	-2.32895	0.000588	0.00917	-2.44727	+
Q9WUM5	Succinyl-CoA ligase [ADP/GDP-forming] subunit alpha, mitochondrial	Suclg1	-2.47487	-1.83626	-3.03599	0.019444	0.044856	-2.44904	+
A0JNY3	Gephyrin;Molybdopterin adenylyltransferase;Molybdopterin molybdenumtransferase	Gphn	-2.4092	-2.45284	-2.48747	8.5e-05	0.008336	-2.44984	+
Q9QZD8	Mitochondrial dicarboxylate carrier	Slc25a10	-2.27317	NA	-2.6363	0.047001	0.082862	-2.45473	+
P50544	Very long-chain specific acyl-CoA dehydrogenase, mitochondrial	Acadvl	-2.47296	-2.6601	-2.26954	0.002082	0.013543	-2.46753	+
P10605	Cathepsin B;Cathepsin B light chain;Cathepsin B heavy chain	Ctsb	-2.16264	-2.77201	-2.47078	0.00504	0.020024	-2.46848	+
A2AGS6	Tumor protein p53-inducible protein 11	Trp53i11	-2.73236	-1.84712	-2.83229	0.01568	0.039263	-2.47059	+
Q9CQ01	Ribonuclease T2	Rnaset2	-2.06663	-2.87535	-2.47238	0.008806	0.027398	-2.47145	+
D3Z4S3	Putative peptidyl-tRNA hydrolase PTRHD1	Ptrhd1	-2.63394	-1.66849	-3.15208	0.02927	0.059555	-2.48483	+
Q9QYG0	Protein NDRG2	Ndrg2	-2.57429	-2.25187	-2.6484	0.002378	0.014043	-2.49152	+
Q3UGR5	Haloacid dehalogenase-like hydrolase domain-containing protein 2	Hdhd2	-2.66628	NA	-2.32741	0.043134	0.077608	-2.49684	+
Q9DCS3	Trans-2-enoyl-CoA reductase, mitochondrial	Mecr	-2.42826	-2.5324	-2.55646	0.000246	0.008719	-2.50571	+
Q91ZX7	Prolow-density lipoprotein receptor-related protein 1;Low-density lipoprotein receptor-related protein 1 85 kDa subunit;Low-density lipoprotein receptor-related protein 1 515 kDa subunit;Low-density lipoprotein receptor-related protein 1 intracellular domain	Lrp1	-2.27629	-2.40186	-2.85501	0.004863	0.019665	-2.51105	+
Z4YKB8	Heterochromatin protein 1-binding protein 3	Hp1bp3	-2.29471	-2.73373	-2.53328	0.002525	0.014293	-2.52057	+
O70589	Peripheral plasma membrane protein CASK	Cask	-2.29713	-2.55839	-2.74261	0.002594	0.014557	-2.53271	+
Q7TMR0	Lysosomal Pro-X carboxypeptidase	Prcp	-2.54643	-2.46116	-2.61087	0.000291	0.009029	-2.53949	+
Q9CZP5	Mitochondrial chaperone BCS1	Bcs1l	-2.91952	-2.33606	-2.38488	0.005341	0.020621	-2.54682	+
Q8BGW1	Alpha-ketoglutarate-dependent dioxygenase FTO	Fto	-2.58262	-2.51882	NA	0.007962	0.025744	-2.55072	+
Q7JCY9	ATP synthase subunit a	mt-Atp6;Mtatp6	-2.62994	-2.4601	-2.56257	0.000374	0.009029	-2.55087	+
Q8BGB5	LIM domain-containing protein 2	Limd2	-2.39807	-3.36066	-1.89492	0.027252	0.056829	-2.55122	+
Q7TNV0	Protein DEK	Dek	-2.48854	-2.78055	-2.4001	0.002016	0.013386	-2.5564	+
Q3TMX0	Syntenin-1	Sdcbp	-2.26572	-3.08242	-2.4007	0.00944	0.028657	-2.58295	+
Q9JL35	High mobility group nucleosome-binding domain-containing protein 5	Hmgn5	-2.7114	-3.03429	-2.03929	0.012515	0.034174	-2.59499	+
Q6ZWQ9		Myl12a	-2.41916	-2.77385	-2.60199	0.00155	0.012207	-2.59833	+
Q9DB15	39S ribosomal protein L12, mitochondrial	Mrpl12	-2.69407	NA	-2.50283	0.023416	0.051362	-2.59845	+
Q8K0T0	Reticulon-1	Rtn1	-3.29747	-1.42413	-3.10798	0.048303	0.084427	-2.60986	+
Q8QZT1	Acetyl-CoA acetyltransferase, mitochondrial	Acat1	-2.65541	-2.54893	-2.66011	0.000192	0.008631	-2.62148	+
P58710	L-gulonolactone oxidase	Gulo	-2.76558	-2.81012	-2.30126	0.003818	0.01743	-2.62565	+
Q07646	Mesoderm-specific transcript protein	Mest	-2.62226	-2.7409	-2.52652	0.000555	0.009157	-2.62989	+
Q9Z0J0	Epididymal secretory protein E1	Npc2	-2.48686	-2.95381	-2.47921	0.003515	0.016643	-2.63996	+
P45591	Cofilin-2	Cfl2	-2.72922	-2.12602	-3.06629	0.010676	0.031095	-2.64051	+
P45878	Peptidyl-prolyl cis-trans isomerase FKBP2	Fkbp2	-2.68148	-2.95207	-2.36497	0.004025	0.01788	-2.66617	+
Q9CZS1	Aldehyde dehydrogenase X, mitochondrial	Aldh1b1	-2.70355	-2.74424	-2.62666	0.000164	0.008573	-2.69148	+
Q8VCR7	Alpha/beta hydrolase domain-containing protein 14B	Abhd14b	-2.7069	NA	-2.68162	0.002987	0.015438	-2.69426	+
F8VPU2	FERM, RhoGEF and pleckstrin domain-containing protein 1	Farp1	-2.58198	-2.80033	-2.74492	0.000585	0.009157	-2.70908	+
Q6PHU5	Sortilin	Sort1	-2.47726	-3.13245	-2.51869	0.006057	0.022154	-2.70947	+
A2AP78	High mobility group protein B3	Hmgb3	-2.64894	NA	-2.87332	0.025853	0.054945	-2.76113	+
Q9ES28	Rho guanine nucleotide exchange factor 7	Arhgef7	-3.05094	-3.07981	-2.20955	0.010375	0.030478	-2.7801	+
P17665	Cytochrome c oxidase subunit 7C, mitochondrial	Cox7c	-2.79673	-2.67056	-2.90344	0.000581	0.009157	-2.79024	+
P10649	Glutathione S-transferase Mu 1	Gstm1	-3.06167	-2.45915	-2.89885	0.004086	0.017973	-2.80656	+
Q9R0H0	Peroxisomal acyl-coenzyme A oxidase 1	Acox1	-2.67242	-3.01693	-2.78973	0.001278	0.011573	-2.82636	+
E9QPX3	NADH dehydrogenase [ubiquinone] iron-sulfur protein 4, mitochondrial	Ndufs4	-2.75167	-2.96482	-2.76565	0.000592	0.009182	-2.82738	+
E9Q1V9	Calcium/calmodulin-dependent protein kinase type II subunit delta	Camk2d	-2.04423	-4.04955	-2.41138	0.044168	0.079037	-2.83505	+
P15532	Nucleoside diphosphate kinase A;Nucleoside diphosphate kinase	Nme1	-3.14302	-2.34695	-3.03501	0.00761	0.025104	-2.84166	+
P99029	Peroxiredoxin-5, mitochondrial	Prdx5	-2.91846	-2.77713	-2.86142	0.000207	0.008631	-2.85234	+
F6ZFT1	Acyl carrier protein;Acyl carrier protein, mitochondrial	Ndufab1	-2.6322	-2.90479	-3.07132	0.001984	0.013361	-2.86944	+
Q91VR7	Microtubule-associated proteins 1A/1B light chain 3A	Map1lc3a;Gm5612	-3.61529	-2.1394	-2.8743	0.021244	0.047799	-2.87633	+
Q9Z1E4	Glycogen [starch] synthase, muscle	Gys1	-2.84921	-2.92779	-2.85974	7.3e-05	0.008336	-2.87891	+
Q9D8S4	Oligoribonuclease, mitochondrial	Rexo2	-2.66764	NA	-3.11758	0.049413	0.085747	-2.89261	+
V9GXI7	39S ribosomal protein L20, mitochondrial	Mrpl20	-2.77724	-2.27778	-3.66688	0.018971	0.044211	-2.9073	+
O88736	3-keto-steroid reductase	Hsd17b7	-3.10445	NA	-2.72677	0.041176	0.075006	-2.91561	+
Q9ERR7	15 kDa selenoprotein	Sep15	-2.92733	-3.07335	-2.83845	0.00054	0.009157	-2.94638	+
Q9CPT4	Myeloid-derived growth factor	Mydgf	-3.14929	-2.88822	-2.87458	0.000904	0.010036	-2.9707	+
Q9JL62	Glycolipid transfer protein	Gltp	-2.98827	-3.37353	-2.56734	0.006062	0.022155	-2.97638	+
Q9D2U9	Histone H2B type 3-A;Histone H2B type 3-B;Histone H2B type 2-E	Hist3h2ba;Hist3h2bb;Hist2h2be	-2.67873	-3.17635	-3.09753	0.002667	0.014715	-2.9842	+
Q8VHX6	Filamin-C	Flnc	-3.30484	-3.46724	-2.19982	0.017269	0.041664	-2.99063	+
P37804	Transgelin	Tagln	-2.35011	-4.14625	-2.48607	0.035233	0.067569	-2.99414	+
Q8BNE1	TRPM8 channel-associated factor 1	Tcaf1	-2.85682	-3.30731	-2.8237	0.002699	0.014752	-2.99594	+
G3X8R0	Receptor expression-enhancing protein;Receptor expression-enhancing protein 5	Reep5	-2.73607	-3.03561	-3.30319	0.002919	0.015262	-3.02495	+
Q9ERD7	Tubulin beta-3 chain	Tubb3	-2.73765	-3.23331	-3.10954	0.002413	0.014084	-3.02683	+
Q9JJU8	SH3 domain-binding glutamic acid-rich-like protein	Sh3bgrl	-2.53855	-3.99203	-2.56178	0.024242	0.0525	-3.03079	+
E9PZ00	Prosaposin	Psap	-3.18077	-2.93558	-2.98528	0.000608	0.009274	-3.03387	+
P56379	6.8 kDa mitochondrial proteolipid	Mp68	NA	-3.00821	-3.07816	0.007317	0.024452	-3.04319	+
F6VQ19	Leucine-rich repeat and calponin homology domain-containing protein 2	Lrch2	-4.13225	-2.37663	-2.63498	0.030758	0.061431	-3.04796	+
Q80ZP8	Mesencephalic astrocyte-derived neurotrophic factor	Manf	-3.09626	-3.00244	-3.09589	0.000104	0.008532	-3.06486	+
O88848	ADP-ribosylation factor-like protein 6	Arl6	-3.19238	NA	-2.95443	0.024632	0.053137	-3.0734	+
Q91V61	Sideroflexin-3	Sfxn3	-2.97221	NA	-3.1979	0.023276	0.05111	-3.08506	+
Q9CQH3	NADH dehydrogenase [ubiquinone] 1 beta subcomplex subunit 5, mitochondrial	Ndufb5	-3.08764	-2.91878	-3.26494	0.001044	0.010771	-3.09045	+
P31786	Acyl-CoA-binding protein	Dbi	-2.99201	-3.30738	-3.06717	0.000927	0.010065	-3.12219	+
Q04857	Collagen alpha-1(VI) chain	Col6a1	-2.40294	-3.75194	-3.35986	0.015585	0.039216	-3.17158	+
Q62048	Astrocytic phosphoprotein PEA-15	Pea15;Pea15a	-2.99657	-3.04741	-3.49377	0.002459	0.014148	-3.17925	+
Q9CQ45	Neudesin	Nenf	-2.95101	-3.25448	-3.45988	0.002098	0.013603	-3.22179	+
Q91V76	Ester hydrolase C11orf54 homolog		-2.669	-3.37566	-3.64297	0.007998	0.025744	-3.22921	+
P62774	Myotrophin	Mtpn	-3.48112	-2.61462	-3.69493	0.010088	0.029935	-3.26356	+
Q63810	Calcineurin subunit B type 1	Ppp3r1	-3.26055	-3.22344	-3.34452	0.000119	0.008573	-3.27617	+
F8VPN4		Agl	-3.398	-3.11599	-3.43792	0.000931	0.010086	-3.31731	+
A2AMW0		Capzb	-2.9705	-3.37502	-3.69436	0.003894	0.017658	-3.34662	+
P26645	Myristoylated alanine-rich C-kinase substrate	Marcks	-3.42436	-3.10705	-3.57548	0.001674	0.012494	-3.36896	+
Q60648	Ganglioside GM2 activator	Gm2a	-3.40161	NA	-3.40894	0.000685	0.009561	-3.40527	+
Q3TCD4	Enoyl-CoA delta isomerase 2, mitochondrial	Eci2	-3.25496	-3.13835	-3.83711	0.003992	0.01788	-3.41014	+
Q9D958	Signal peptidase complex subunit 1	Spcs1	-3.07221	-2.76469	-4.49559	0.023135	0.050876	-3.44416	+
P09542	Myosin light chain 3	Myl3	-3.50663	-2.65513	-4.22203	0.016693	0.040731	-3.46127	+
P13541	Myosin-3	Myh3	-3.04717	-4.09515	-3.42414	0.007486	0.024862	-3.52215	+
Q6P5H2	Nestin	Nes	-3.70735	-4.51471	-2.41465	0.02849	0.058404	-3.54557	+
P54227	Stathmin	Stmn1	-3.86051	-3.22564	-3.55206	0.002661	0.014715	-3.54607	+
P32020	Non-specific lipid-transfer protein	Scp2	-3.35544	-3.9002	-3.38962	0.002456	0.014148	-3.54842	+
Q9D6K8	FUN14 domain-containing protein 2	Fundc2	-4.31198	-3.48229	-2.86589	0.013618	0.035942	-3.55339	+
Q00915	Retinol-binding protein 1	Rbp1	-3.5326	-3.57233	-3.60022	3e-05	0.006528	-3.56838	+
Q9JJV2	Profilin-2;Profilin	Pfn2	-3.23399	-3.88029	-3.61	0.002737	0.014799	-3.57476	+
Q9DCC5	Chromobox protein homolog 3	Cbx3	-4.15988	-2.32141	-4.29328	0.029977	0.06041	-3.59152	+
Q8CI94	Glycogen phosphorylase, brain form	Pygb	-3.58933	-3.66172	-3.564	6.6e-05	0.008336	-3.60502	+
Q9CPP6	NADH dehydrogenase [ubiquinone] 1 alpha subcomplex subunit 5	Ndufa5	-3.70424	-3.80716	-3.3394	0.001536	0.012161	-3.61694	+
P20152	Vimentin	Vim	-3.25712	-3.97049	-3.64698	0.003221	0.015919	-3.62486	+
Q9EQF6	Dihydropyrimidinase-related protein 5	Dpysl5	-3.49166	-4.12704	-3.26952	0.004975	0.019918	-3.62941	+
O08553	Dihydropyrimidinase-related protein 2	Dpysl2	-3.35993	-4.15627	-3.59529	0.004042	0.01788	-3.70383	+
Q99L27	GMP reductase 2	Gmpr2	-3.8541	-3.83318	-3.53864	0.00074	0.009859	-3.74198	+
Q64449	C-type mannose receptor 2	Mrc2	-3.73902	-3.94267	-3.59513	0.000719	0.009743	-3.75894	+
P51667	Myosin regulatory light chain 2, ventricular/cardiac muscle isoform	Myl2	-3.60847	-3.3519	-4.3166	0.005838	0.021663	-3.75899	+
Q9JJG6	Transmembrane protein 47	Tmem47	-4.72965	-4.18421	-2.46029	0.031033	0.061766	-3.79138	+
P05132	cAMP-dependent protein kinase catalytic subunit alpha	Prkaca	-3.85553	-3.5761	-3.97853	0.000978	0.010385	-3.80339	+
Q91Z83	Myosin-7	Myh7	-4.4272	-3.40464	-3.69991	0.00619	0.022402	-3.84392	+
D3YWY6	Mitochondrial pyruvate carrier 1	Mpc1	-3.32259	-4.43548	-3.79569	0.006938	0.023767	-3.85126	+
Q9QXS6	Drebrin	Dbn1	-3.44478	-3.99103	-4.17247	0.003179	0.015919	-3.86943	+
P13595	Neural cell adhesion molecule 1	Ncam1	-3.32272	-4.82674	-3.52497	0.01435	0.037204	-3.89148	+
Q05816	Fatty acid-binding protein, epidermal	Fabp5	-3.95081	-4.21246	-3.81687	0.000845	0.010036	-3.99338	+
D3YYT0	Cadherin-2	Cdh2	-4.01381	-4.26841	-3.76262	0.00132	0.01163	-4.01495	+
P17047	Lysosome-associated membrane glycoprotein 2	Lamp2	-3.90497	-4.02535	-4.44597	0.001576	0.012324	-4.12543	+
Q792Z1		Try10;Gm5771;Prss1	-4.36076	-2.56144	-5.57931	0.04151	0.07534	-4.16717	+
Q8K009	Mitochondrial 10-formyltetrahydrofolate dehydrogenase	Aldh1l2	-4.35825	-3.40107	-5.0454	0.01225	0.033629	-4.26824	+
E9PWE8	Dihydropyrimidinase-related protein 3	Dpysl3	-4.30938	-4.3265	-4.49693	0.000187	0.008631	-4.3776	+
Q91VB8	Hemoglobin subunit alpha	haemaglobin alpha 2;Hba	-4.955	-3.89517	-4.28375	0.004962	0.019888	-4.37797	+
Q02566	Myosin-6	Myh6	-4.81693	-4.88411	-3.43639	0.011408	0.0322	-4.37914	+
Q9WUB3	Glycogen phosphorylase, muscle form;Alpha-1,4 glucan phosphorylase	Pygm	-5.04412	-4.72541	-3.80956	0.006617	0.023209	-4.52636	+
