# Supplementary material for: Epigenetic mechanisms of Strip2 in differentiation of pluripotent stem cells
Source: Cell Death Discov. 2022 Nov 5;8:447. doi: 10.1038/s41420-022-01237-5 (PMC9637104; doi:10.1038/s41420-022-01237-5)
Supplement: Supplementary file 15 — Table S6 [file 41420_2022_1237_MOESM15_ESM.xlsx]

## Sheet: Kmean clusters
Protein	ESCs	D4	D16	Cluster
A0A023T672	1.03467	1.17306	1.08852	1
A0A087WNV1	-1.1854	-1.12662	-0.96223	2
A0A087WQH8	-1.85249	-0.952514	-1.43972	1
A0A087WR50	0.907815	2.13603	-0.210331	1
A0A087WS18	-0.0160101	-0.206431	-0.678717	3
A0A0A0MQ68	0.589781	1.0569	-0.84774	3
A0A0A0MQ80	0.869863	0.974594	1.44912	2
A0A0A0MQ99	-1.11691	1.00751	1.2006	2
A0A0A0MQA5	-0.225488	-0.82647	-0.0853048	4
A0A0A0MQC2	-2.04034	1.40901	1.2959	2
A2A468	0.158732	1.73405	1.49762	2
A2A4A1	-2.38036	-1.903	-1.03736	2
A2A4P0	0.195321	0.886044	1.11236	2
A2A5R2	0.472046	1.0014	0.515599	1
A2A7A7	0.996804	1.06523	-0.814313	3
A2A7S7	0.96248	1.02662	0.654592	3
A2A8L5	0.912371	-0.246323	0.364049	4
A2A8R7	1.38895	1.00563	0.650438	3
A2A9K3	-0.120378	0.980937	1.35591	2
A2A9Q2	1.42196	1.09634	0.590247	3
A2AF47	0.994868	-1.16347	-0.26223	3
A2AHY3	-1.81373	-2.15424	-1.24041	2
A2AIX1	0.919041	1.4538	0.155039	1
A2AJ72	0.132575	0.90881	0.643388	2
A2AJI0	0.488224	-0.583971	-1.05947	3
A2AKH7	-2.2879	-1.52144	-1.29002	2
A2AKX3	0.0769332	1.53073	1.72593	2
A2AMW0	-3.31376	-3.06924	-2.52333	2
A2AP78	-0.642455	-3.44969	-1.90209	4
A2APB8	0.546818	1.10222	1.01569	2
A2AQJ5	-1.38231	-1.45347	-0.903281	2
A2ARP8	0.327158	1.25184	-0.871692	1
A2ARV4	0.488224	-0.91047	0.302994	4
A2AWF2	0.285231	2.31795	2.47206	2
A2CG63	-1.25588	-1.27743	-1.08156	2
A2RSY6	-0.537837	-0.741823	-1.17532	3
A2TJV2	1.17613	1.87203	2.61888	2
A3KGI3	-1.62523	-0.974587	0.271974	2
A3KGV1	-1.53466	-1.14279	0.480645	2
A6PW84	1.04681	1.94802	-0.512519	3
B1AR46	2.57353	-0.657475	-0.238942	3
B1ARB3	1.13029	2.85312	1.3817	1
B1ARD6	1.7567	2.9016	2.64086	2
B1AT92	0.558355	0.980216	0.483406	1
B1ATV0	0.464567	-0.216398	-0.209276	3
B1AX58	0.488224	-0.902323	-0.216276	4
B2RRI2	0.201495	1.06595	1.22735	2
B2RUJ8	-2.61641	-1.86884	-1.51589	2
B2RWS6	0.91509	1.17612	1.36392	2
B2RXP1	0.488224	-0.252708	-0.874802	3
B2RXW8	0.308539	0.891567	0.199222	1
B7ZP47	0.57058	1.01827	1.18128	2
B9EJX5	1.15167	1.16871	1.34664	2
D3YU12	0.221869	-0.400561	-0.885114	3
D3YUP1	0.402817	-0.239969	0.414276	4
D3YVL0	1.05545	1.23102	1.1392	1
D3YWI4	0.564908	0.966043	-1.51922	3
D3YWJ4	-0.747244	-0.528436	-0.539238	2
D3YWX2	0.846878	0.927575	-0.2247	3
D3YX85	0.488224	-1.30732	-0.82713	3
D3YYT0	0.488224	-3.19652	-2.95768	3
D3YYU8	-1.08583	-0.757037	-0.81062	2
D3YZ09	-0.218912	-1.10936	-1.54009	3
D3YZ20	-2.57369	-2.35123	-1.44674	2
D3Z041	1.0356	1.22696	-1.04253	3
D3Z0M9	1.18311	1.03241	0.91486	3
D3Z125	-1.52888	-1.46407	-0.373319	2
D3Z442	1.53302	1.13602	-1.33532	3
D3Z456	-1.24863	-1.83311	-1.96527	3
D3Z4B2	-1.83195	-0.724308	-1.42073	1
D3Z687	-0.397116	-0.904868	-0.779638	3
D3Z7C0	0.733513	-0.596953	-0.751473	3
D3Z7G3	1.00717	1.27252	1.05239	1
D5MCW4	-2.54469	-1.47089	-1.68165	2
D6RHA2	0.701421	1.07004	0.956799	2
E0CX98	-1.89725	-3.02146	-1.60203	4
E0CXS2	0.483575	1.0509	1.35028	2
E0CYB9	-0.483113	-2.28156	-0.516056	4
E9PUF7	0.754207	1.06141	0.869509	1
E9PUJ6	0.319096	-0.649653	-0.495696	3
E9PV41	0.993138	1.16799	1.44262	2
E9PV44	-0.946729	-1.3466	-1.45685	3
E9PVX6	0.253929	-0.287862	1.40297	2
E9PWE8	0.0712008	-0.491825	-3.13058	3
E9PWG2	0.247174	0.950754	0.585093	1
E9PWM3	-0.804262	-0.876059	-1.58212	3
E9PWV3	0.417748	0.807007	0.0188564	1
E9PX30	-1.11255	-0.273264	-0.291996	2
E9PXX7	0.0726272	-0.557036	-1.04497	3
E9PXY8	-0.303688	1.22157	1.51682	2
E9PYK3	0.812039	0.890607	0.42825	3
E9PZ00	-1.89002	-2.11649	-2.13473	3
E9PZ88	2.1466	0.940352	0.35532	3
E9PZB3	-0.318076	-0.580837	0.0745012	2
E9PZM7	1.18567	0.889811	0.22255	3
E9Q035	0.465175	-0.176195	-2.89622	3
E9Q066	1.07166	1.41662	1.54311	2
E9Q070	-1.44638	-1.60157	-0.504582	2
E9Q0N0	-1.69628	-1.57463	-1.42499	2
E9Q309	0.570563	-1.44067	-0.436419	4
E9Q368	-2.07444	-0.341977	-0.739236	2
E9Q3D4	0.377756	2.53108	1.79455	2
E9Q3G8	0.659332	0.911218	1.08001	2
E9Q3X0	0.812354	1.82398	0.689303	1
E9Q412	1.13225	1.03231	1.4059	2
E9Q4K7	0.884534	1.35742	0.438377	1
E9Q4P1	0.176789	-0.595269	-0.0582344	4
E9Q4Y4	-0.437433	0.829888	1.03606	2
E9Q507	-0.654103	0.966115	1.11808	2
E9Q557	3.69466	-1.92565	-0.421019	3
E9Q5B0	0.894949	1.22705	1.75232	2
E9Q5C9	1.43735	1.09641	1.73139	4
E9Q5G3	0.0664361	1.01438	1.62634	2
E9Q634	-1.25737	1.54272	0.959035	2
E9Q6C7	0.488224	-1.8257	-0.465728	4
E9Q6H8	-0.965145	-0.366983	0.186926	2
E9Q6S4	0.599559	1.8969	2.71422	2
E9Q7C4	-0.547063	1.00627	1.0792	2
E9Q7L1	0.777841	0.939446	1.57963	2
E9Q7U2	1.77588	1.44985	1.75761	4
E9Q7W0	0.423806	1.81305	2.25087	2
E9Q8D0	1.41104	2.17993	1.57902	1
E9Q8I7	0.488224	-1.22171	0.237454	4
E9Q9I2	-2.59896	1.44437	1.36231	2
E9Q9L6	-1.74544	0.893333	0.505568	2
E9Q9Y4	1.04381	1.71729	2.80492	2
E9QAE4	0.461197	1.47916	1.77853	2
E9QAF9	0.4977	1.76971	1.10127	1
E9QAN4	0.226515	-1.79177	-1.03661	3
E9QAU4	0.293346	1.11748	1.83266	2
E9QJS0	-1.47939	-1.38972	-0.983572	2
E9QJU8	-1.49473	-1.49192	-0.189658	2
E9QK36	0.513164	1.00954	1.16372	2
E9QKA2	0.774405	3.38174	2.53773	2
E9QKD1	0.807917	1.06984	1.74037	2
E9QKZ2	-0.291082	-0.293768	-0.565824	3
E9QL25	-1.79278	-0.446545	1.68398	2
E9QL53	-0.244444	-0.197902	1.29201	2
E9QLB2	-1.13055	-0.330548	-0.255311	2
E9QLG3	0.429874	1.17917	1.68112	2
E9QLQ9	-1.34685	-0.165612	-0.281699	2
E9QML5	0.802577	1.09607	0.595775	1
E9QMN5	0.792029	1.01569	1.5355	2
E9QMV2	0.608049	-0.496687	-0.708727	3
E9QN31	1.00386	0.928602	1.28708	2
E9QN70	0.510622	-0.364218	0.461854	4
E9QNX9	0.488224	-0.741719	-0.427556	3
E9QP99	0.594298	0.920207	0.0114893	3
E9QPN7	0.25724	1.54372	1.22629	2
E9QPX1	1.04493	1.95366	0.302048	1
E9QPX3	-1.87671	-1.93546	-1.97133	3
F2Z470	0.488224	0.958199	-0.92024	3
F2Z4A3	-1.4998	-1.23861	0.850982	2
F6QL70	-2.99782	-2.48518	-1.71153	2
F6QX82	1.23361	1.34741	1.36288	2
F6RJC1	-2.49151	-1.64417	-2.05793	1
F6TLV3	-0.810482	-0.954953	-0.326624	2
F6TVX7	0.99168	0.999169	-0.130142	3
F6UHR6	1.27274	1.45419	0.801474	3
F6UR10	-0.562717	-1.0578	-1.33356	3
F6WIU1	0.809107	1.16954	-0.277255	3
F6XC25	1.83693	1.63437	1.65937	3
F6ZFT1	-2.45606	-2.01668	-2.05191	2
F7ASG0	-1.6792	-1.66587	0.0745186	2
F7BJB9	0.353411	0.962911	1.73413	2
F7CVJ5	-1.69111	-0.81226	-0.520224	2
F8VPL2	-0.664055	-0.456734	-0.537486	1
F8VPU2	0.488224	-1.72144	-1.84687	3
F8VPV0	0.397472	1.21898	1.4973	2
F8VPY2	0.797957	1.11479	1.07356	2
F8VQ29	-0.0822419	0.976002	1.06209	2
F8VQB6	0.755913	1.59237	1.06551	1
F8VQC1	-0.865899	-1.2979	-0.96422	4
F8VQC7	-1.03701	-0.463802	-0.280477	2
F8VQC9	0.841279	-0.774228	-0.0743209	3
F8WGN6	0.488224	-0.469554	-0.420127	3
F8WHN2	0.953638	1.47481	3.05401	2
F8WHT3	-0.18747	0.88972	-0.221026	1
F8WHU7	0.421172	0.84288	0.301836	1
F8WIT2	0.613401	1.07681	-1.33583	3
F8WIV2	-0.634456	-1.33078	-1.00629	3
F8WIX8	0.0782191	-0.984637	0.227638	4
F8WJ40	0.329325	1.05999	1.02479	2
G3UWY3	0.0481041	3.59123	2.77904	2
G3UX50	0.378127	1.11948	1.27938	2
G3UXZ5	-0.682067	-0.653661	-0.994818	3
G3UY19	0.54835	0.788621	1.18386	2
G3UYN0	1.56485	1.80947	3.50629	2
G3UYW1	-0.429496	1.05481	-0.0757992	1
G3UZY2	-3.80502	-2.59198	-1.77876	2
G3X8Q0	-0.960024	-0.688425	0.0492969	2
G3X8R0	-1.27047	-2.62085	-2.22735	3
G3X928	-2.21227	-0.302203	-0.780514	2
G3X956	0.679555	-0.446347	0.868192	4
G3X9G4	1.34283	1.13107	0.253908	3
G3X9H7	1.45944	2.89862	1.97938	1
G3X9J6	-0.38194	1.03355	-0.0931036	1
G3X9V0	0.451501	-1.04732	-0.165808	4
G3XA21	2.16888	1.27948	1.13946	3
G5E814	-0.625789	-0.737993	-1.72356	3
G5E870	-0.24592	0.921625	0.72817	2
G5E8K2	-0.657037	-0.332609	-0.323881	2
G5E8N5	0.550328	-0.562678	-0.0281265	4
G5E8R3	-0.0700831	1.08558	-1.02299	1
G8JL68	0.48604	1.12396	-0.328997	1
H3BJQ3	1.09315	1.76767	2.38279	2
H3BKF4	0.484843	-1.26325	0.229833	4
H3BKS8	0.518306	0.932856	1.03318	2
H3BL37	1.52548	1.30269	1.31351	3
H3BL81	-2.7261	-2.62496	-1.40565	2
H7BWX9	-2.06105	-1.93588	-1.38089	2
I1E4X7	0.622929	0.872238	-0.621678	3
J3QJU5	0.406205	0.981777	1.70086	2
K3W4Q8	1.18311	1.81011	0.663293	1
K3W4R2	1.29456	1.37427	0.358112	3
O08529	0.488224	-1.99108	-1.56293	3
O08553	0.457916	-1.58193	-2.87283	3
O08582	1.13663	1.04357	0.799071	3
O08601	-1.83038	-0.552735	-1.55037	1
O08749	-1.05929	-1.78501	-1.60378	3
O08848	-1.74912	-1.25509	-1.94156	1
O08969	-2.95902	-1.06206	-0.792919	2
O08997	-2.23397	-2.39503	-1.47479	2
O09172	0.619815	1.54676	1.45659	2
O35054	1.65917	1.78033	1.72818	1
O35242	0.488224	-1.48955	-1.05451	3
O35381	0.217198	-0.240416	0.0881606	4
O35387	1.07593	1.22499	0.135785	3
O35459	0.651626	1.05876	-0.697965	3
O35604	-0.0469769	-0.367402	0.392625	2
O35621	1.45367	1.97478	0.953916	1
O35623	-0.595043	-0.877149	-1.30831	3
O35639	-0.142872	-1.06383	-0.203635	4
O35682	0.891109	-0.349648	0.181103	3
O35900	-1.88615	-1.81286	-1.49408	2
O54782	-1.39812	-0.84143	-0.0396428	2
O54790	-1.55475	-2.07443	-1.91247	3
O54926	0.761906	0.885095	0.819705	1
O54946	0.139368	1.6248	1.05975	2
O54962	-2.46658	-2.01744	-0.956228	2
O55057	-0.32991	-0.278926	-0.739488	3
O55091	-0.502302	-0.184552	0.737212	2
O55100	1.60285	2.02382	1.54956	1
O55111	-0.150613	-0.670366	-0.128392	4
O55137	-2.41028	-0.540996	-1.66852	1
O55222	0.339008	-0.43975	-0.831243	3
O70251	-2.12801	-1.81911	-1.20386	2
O70274	0.275685	-0.147741	-0.738327	3
O70311	-1.30861	-1.5305	-0.889346	2
O70400	1.16264	2.10058	1.56579	1
O70404	1.26794	-0.337781	0.557864	4
O70405	0.0528171	1.53899	0.607532	1
O70456	-1.72164	-2.24224	0.334564	2
O70475	1.30624	1.49106	0.445608	3
O70576	1.70861	2.21376	2.49207	2
O70579	1.13843	1.8236	0.847645	1
O70589	0.488224	-2.51774	-1.80319	3
O88307	1.60795	1.02012	1.52902	4
O88322	0.589222	1.52145	1.24103	2
O88441	-1.72081	-0.65405	-0.770307	2
O88735	-0.459259	0.968099	1.26925	2
O88792	-0.129684	-1.15924	-0.30124	4
O88811	-2.61226	-1.41761	-1.82316	2
O88848	-2.7713	-2.30819	-2.14351	2
O88952	0.453476	-0.226011	0.247809	4
O88958	0.568388	1.35412	1.84662	2
O88967	-1.00163	-0.363281	-0.378145	2
O88986	0.905609	1.11913	0.959972	1
O89001	0.488224	-1.1832	-1.48743	3
O89017	-0.314976	-0.917484	0.423936	4
O89023	-0.501595	-2.20417	-1.21234	4
O89051	-0.335235	-1.16777	-0.802083	3
P00920	-0.0759515	-2.01123	1.68223	4
P03958	-1.59598	-2.70362	-0.551487	4
P05132	-1.85793	-2.78299	-2.73834	3
P05214	1.42699	2.43928	3.53523	2
P06797	-0.625647	-0.528104	-0.401272	2
P06801	0.870607	-0.617568	0.117011	4
P07901	0.891425	1.46974	1.88324	2
P08207	-1.58969	-2.74846	-0.640957	4
P08226	1.99794	1.63818	0.567857	3
P08752	0.877576	-0.56685	-0.211416	3
P09055	-0.957029	-0.432219	-0.203636	2
P09528	-0.837631	-0.301156	-0.606735	1
P09542	-4.62348	-1.52752	-2.92259	1
P09671	-1.31878	-0.946439	-1.06154	2
P10493	0.715278	2.30197	-0.142531	1
P10639	-0.986085	-0.821331	-0.4705	2
P10649	1.52762	1.73938	-2.04461	3
P10833	1.56566	-0.553345	-0.0392861	3
P10852	1.15881	1.17696	1.07836	3
P11260	-1.68996	2.56176	0.845248	1
P11403	0.439906	2.62203	0.271974	1
P11404	1.47203	2.38587	2.53163	2
P12265	0.427379	-0.884995	-1.70921	3
P13011	-0.992544	-0.768831	-3.18779	3
P13541	-4.62505	4.62704	-2.82658	1
P13864	1.29452	1.51326	1.61218	2
P14069	-1.60699	-2.01828	-0.797665	2
P14602	0.534899	2.76132	2.34775	2
P14869	-1.80128	-1.72987	-0.946122	2
P14873	1.21225	0.836401	-1.39906	3
P15532	-2.76052	-2.26027	-2.10616	2
P15864	-3.11705	-3.14574	-1.4482	2
P16045	1.66431	1.57891	-0.973087	3
P16125	-1.63674	1.30037	1.11398	2
P16460	0.537082	2.48943	0.193518	1
P16546	-1.68956	-1.76744	-2.66503	3
P17047	-2.37121	-3.70762	-3.09203	3
P17665	-2.74377	-2.15565	-1.92489	2
P17809	0.868873	-0.833177	1.38332	4
P18155	1.37025	2.01451	0.913702	1
P18760	-1.7892	-1.63257	-1.49394	2
P19324	1.57767	-0.736029	-1.18686	3
P20060	1.17298	1.09946	0.0276276	3
P20152	0.487307	-1.27912	-2.73226	3
P21460	1.29719	-0.527161	-0.291826	3
P21619	0.91194	0.956804	0.531002	3
P21995	0.955155	-0.835243	2.90252	4
P22366	-1.28542	-0.426748	-0.396833	2
P22935	-1.13759	-1.03079	-0.645905	2
P23591	1.40152	1.1305	0.849272	3
P24270	1.30487	0.902944	0.220053	3
P24288	1.1641	2.19241	1.63258	1
P24472	0.845586	1.44419	0.793375	1
P26350	-2.11412	-2.13693	-1.31017	2
P26443	0.709201	1.045	-0.541458	3
P27546	0.858289	0.926674	-0.0704227	3
P27601	0.548253	1.25556	0.775204	1
P27641	0.94245	1.01006	1.74976	2
P28658	1.09056	1.40214	1.19731	1
P29416	1.45617	0.950202	0.501943	3
P29758	0.0384825	-0.92351	-0.0440651	4
P30681	-4.14663	-2.66976	-2.70996	2
P31786	-1.66813	-1.36369	-2.23052	3
P31938	-1.98175	-1.28804	-1.53398	2
P32020	-1.25115	-1.66723	-2.67908	3
P32037	1.83579	0.840683	3.1875	2
P32507	0.474026	-0.237815	0.634291	4
P34152	1.33062	1.30666	0.831159	3
P35290	-0.673616	-1.56867	-0.22573	4
P35505	0.44985	-0.437338	-1.20039	3
P35761	0.326529	1.10315	1.6616	2
P35951	-1.13421	-0.218428	-0.793553	1
P37804	0.488224	-3.5599	-2.86524	3
P40240	-2.55785	-0.891248	-0.201692	2
P40630	-1.2756	-1.18715	-0.982679	2
P41731	-1.10201	-1.371	-0.976238	4
P42209	-0.178754	1.94573	2.64858	2
P42567	1.69955	1.34563	-0.400256	3
P43247	0.594653	0.977597	2.2466	2
P43274	-2.42371	-3.21906	0.271974	2
P43275	-3.25243	-4.40543	-0.941698	2
P43276	-3.04172	-3.62558	-2.09025	2
P43277	-2.69238	-3.03221	-0.608327	2
P43406	-1.04781	-0.861799	-0.384494	2
P45591	-1.96797	-1.77738	-2.0481	1
P45878	-0.93913	-2.12261	-1.96168	3
P45952	0.112109	0.989695	-0.0219715	1
P46656	-1.03661	-0.630696	-0.861858	1
P47738	0.838005	1.12819	0.749747	1
P47857	1.4803	1.35541	0.855895	3
P47955	-0.683943	-1.00247	-0.609238	4
P48381	0.488224	-1.44665	-1.29286	3
P48722	0.488224	-0.359815	-1.3943	3
P48754	0.902442	1.22446	0.479665	1
P48771	-1.57229	-1.2174	-0.978461	2
P48774	-3.20604	-0.171651	-0.534303	2
P48962	0.596946	1.13088	-0.959498	3
P48972	0.565742	2.01229	1.98629	2
P49135	0.707342	1.10948	0.0407066	3
P49769	0.0895943	-0.522803	-0.417925	3
P51660	0.51254	-0.217577	-0.866998	3
P51807	-1.43268	-0.941183	-1.00051	2
P51855	1.0202	1.9544	0.348902	1
P51859	-1.7507	-2.20663	-1.12313	2
P51949	0.668203	0.839946	1.77742	2
P52194	-0.428165	2.62562	2.77473	2
P52196	1.12895	1.9709	-0.555094	3
P52480	1.33848	0.948213	1.55536	4
P52483	-0.996227	-1.4464	-0.994557	4
P52734	-1.10888	1.68009	1.52821	2
P52875	0.954292	-0.371141	-0.512311	3
P54116	1.04051	-0.915439	-0.904683	3
P54227	-3.13511	-2.15866	-2.64905	1
P54276	0.618055	1.16476	2.28074	2
P54731	1.46606	1.37361	1.34324	3
P54923	0.335934	1.0544	-0.0817039	1
P55258	-2.54477	-0.720595	-0.621843	2
P55264	-0.576436	-0.81517	-1.95026	3
P56213	0.221657	1.05664	1.1207	2
P56376	0.179692	0.906625	0.383185	1
P56379	-2.40321	-2.17636	-2.05709	2
P56382	-1.0242	-0.984336	-1.09519	3
P56389	0.488224	-3.25697	-1.40403	4
P56677	-1.25454	-0.941874	1.857	2
P57716	-0.0820686	-0.461132	-0.525465	3
P58021	-0.15886	-0.618483	-0.52938	3
P58044	-1.71009	-1.45591	-1.19664	2
P58137	0.924891	0.904074	0.453961	3
P58710	-3.34876	-3.14687	-1.85428	2
P58854	-1.07935	-0.340919	-0.516489	2
P59470	-1.94064	-1.70924	-0.564282	2
P59999	-0.00264019	-0.248425	-0.450496	3
P60330	0.892248	1.09567	2.31925	2
P60487	1.29487	1.66403	0.441514	3
P60710	-1.00861	-0.916061	-1.11203	1
P60904	-1.7494	-1.92275	-2.2096	3
P61028	-0.121085	-1.03599	-1.45566	3
P61080	-1.13006	-1.40659	-1.35771	3
P61161	-0.057604	-0.214846	-0.445207	3
P61327	1.08296	1.32756	1.4373	2
P61514	-2.06224	-1.23788	-0.830543	2
P61750	-1.18136	-1.0992	-1.1633	1
P61982	0.541925	0.90519	0.643991	1
P62313	-1.74717	-2.00728	-1.14096	2
P62317	0.831498	-1.55217	-0.798652	3
P62342	-0.338707	-0.409245	-0.322121	4
P62737	0.51915	-0.51505	-0.465785	3
P62751	-2.48546	-3.22998	-1.61818	4
P62774	-2.94324	-2.49707	-2.52376	2
P62806	-0.0218447	-0.958144	0.543754	4
P62874	0.389929	-0.207955	-0.162865	3
P62876	-1.91055	-1.43275	-0.962194	2
P63024	0.306025	-0.303022	-0.0949914	3
P63028	-1.91406	-2.60415	-1.6126	4
P63276	-1.8048	-1.8181	0.725943	2
P63280	-1.62214	-1.63489	-1.19421	2
P63321	-3.1558	-2.5082	-1.95568	2
P68033	0.324648	-0.932621	-0.525937	3
P68510	-2.37147	-1.69626	-0.771954	2
P70122	0.803745	0.888215	0.810167	1
P70227	0.860569	1.47134	0.710594	1
P70245	0.852993	-0.185789	-0.14856	3
P70280	-2.06254	-1.04224	0.0463324	2
P70302	0.507467	-1.07534	-0.6202	3
P70335	-1.76869	-2.22355	-1.02445	2
P70423	1.16823	1.06388	1.66045	2
P70665	-0.432983	-0.470063	-1.14099	3
P70677	0.388232	-0.697501	-0.448685	3
P83741	0.589459	1.14642	0.310196	1
P83882	-2.9817	-2.6235	-1.96672	2
P83917	-1.15575	-1.2128	-0.400688	2
P84089	-1.80001	-1.70907	-1.5587	2
P84096	0.673643	-0.719815	-1.14913	3
P84228	-0.158018	-0.809738	-0.219505	4
P85094	0.343333	1.41011	0.6317	1
P97287	0.348523	1.07269	0.650746	1
P97314	0.534609	1.13876	1.05984	2
P97315	-2.02625	-2.11782	-1.9339	4
P97355	-1.55115	-1.58981	-1.32909	2
P97452	0.932109	1.25539	1.71455	2
P97473	1.00162	1.14779	1.15541	2
P97499	0.929198	1.33243	0.931689	1
P97742	-1.44377	2.13633	-0.465746	1
P97770	0.828657	0.93744	0.414766	3
P97807	-0.113618	-0.396732	-0.41272	3
P97821	1.26178	-0.699123	1.27631	4
P97823	-1.61644	-0.774676	-0.305174	2
P97868	-0.0186489	1.00831	0.538099	1
P97929	0.244951	-1.01921	1.95959	2
P97931	0.57844	1.23406	1.37869	2
P98203	0.969707	1.66007	1.05011	1
P99027	-0.777781	-1.08722	-0.674182	4
P99029	-1.47102	-1.52423	-1.93625	3
Q00547	0.115042	1.01712	-0.124031	1
Q00612	1.29994	0.948987	1.01454	3
Q00915	0.509139	-0.694459	-2.4521	3
Q00PI9	0.630934	0.853676	0.568521	1
Q03145	-2.51294	-0.203326	-1.18708	1
Q03958	-1.53003	-1.25682	-0.846416	2
Q04447	1.01147	2.05952	-0.0728862	1
Q04690	-1.33378	-0.611758	-1.50375	1
Q04692	-2.30095	1.36193	1.35419	2
Q04750	0.112906	-0.776531	-1.13576	3
Q04857	3.55032	3.8703	-2.5669	3
Q05816	0.0495231	-1.75101	-2.91534	3
Q06138	-0.0925205	-0.356003	-0.173161	4
Q06185	-1.71941	-1.64125	-1.58173	2
Q07076	1.0422	0.946885	0.795859	3
Q07113	1.15479	-0.205806	-0.998856	3
Q08093	-1.53926	-1.10473	-0.707076	2
Q08943	1.17455	-0.31224	0.555945	4
Q09XV5	0.39793	0.999815	0.782062	2
Q0KL02	-0.347745	-1.08196	-0.894963	3
Q0VF62	0.702278	1.08865	1.53518	2
Q2Q5T5	1.25805	3.94177	3.58262	2
Q3KR45	0.0534433	-1.49157	0.350669	4
Q3TC46	0.632021	0.97482	0.810703	1
Q3TCN2	0.411378	-0.3763	-0.603622	3
Q3THK7	0.350143	-0.189005	0.117372	4
Q3THW5	-1.9329	-2.26883	-1.52587	4
Q3TJ22	-3.06804	-1.25798	-1.81243	2
Q3TJD7	-0.788868	-0.964368	-0.445515	2
Q3TLP5	2.0966	1.49807	1.83479	4
Q3TMX0	-2.799	-2.49572	-2.06031	2
Q3TRM4	0.962243	0.998744	1.00086	2
Q3TV70	1.16604	1.4209	1.0243	1
Q3TVF4	-2.51704	-1.82577	-1.66372	2
Q3TW27	-1.21696	-0.687092	-0.306967	2
Q3TYD6	0.916552	1.7377	1.81902	2
Q3TZX3	1.17639	1.00759	0.912528	3
Q3U125	-2.00802	-3.75338	0.459025	2
Q3U3A7	0.345727	1.27199	1.83832	2
Q3U3J1	0.327072	0.892439	0.512575	1
Q3U5F4	-0.490224	1.01038	1.24598	2
Q3U7R1	0.706557	0.782204	-0.305932	3
Q3U9N4	0.721258	-0.354366	-0.856294	3
Q3UDE2	1.29571	0.932859	0.533486	3
Q3UEB3	1.12815	0.966442	0.984011	3
Q3UGX2	0.430185	-0.269341	-1.60623	3
Q3UH06	-0.880957	-1.59187	0.271974	2
Q3UH28	1.61814	-2.67173	-1.4297	3
Q3UH59	0.369341	-0.777462	-1.01146	3
Q3UH60	1.19494	1.12598	0.907422	3
Q3UHK6	-0.660664	-0.614413	-1.15014	3
Q3UHQ6	0.72373	1.36222	0.32089	1
Q3UHU8	0.469921	-0.336848	-0.158635	3
Q3UHX2	-2.56946	-2.34336	-1.36604	2
Q3UIL6	0.499038	1.72354	1.2753	2
Q3UIX4	-1.44669	-1.55993	-1.00495	2
Q3UJP5	0.1581	-0.279868	-0.599065	3
Q3UMT1	0.709379	0.977923	0.149272	3
Q3UMW8	-1.0834	-2.16299	-0.756863	4
Q3UQ28	0.488224	-1.68433	-0.952427	3
Q3UQ84	0.442104	-0.618262	-0.316022	3
Q3URU2	-1.16481	-1.61302	-1.20066	4
Q3UUQ7	-0.251917	-1.43611	-0.455024	4
Q3UUW5	0.350322	0.905363	1.33791	2
Q3UVG3	1.01904	1.08548	0.628146	3
Q3UZ39	0.488224	-2.19798	-1.51144	3
Q3V0C5	0.252327	1.03175	1.65686	2
Q3V116	-1.21762	1.17983	0.519601	2
Q3V300	0.328178	0.871417	1.68428	2
Q4FE56	0.456553	1.35533	0.641837	1
Q4FK66	1.96128	1.11406	0.72388	3
Q4JK59	-0.23922	2.66217	0.271974	1
Q4LDD4	1.06231	1.41778	0.58262	1
Q505D7	0.299168	-0.219197	-0.460141	3
Q5DTT3	-0.394133	-2.4591	-0.852678	4
Q5DU37	0.524952	1.18066	0.469004	1
Q5I043	0.959366	1.2938	1.46447	2
Q5KU39	0.346665	1.00655	0.546658	1
Q5RJG1	0.868666	0.978489	0.271974	3
Q5SQ20	0.650809	0.865243	1.5073	2
Q5SQX6	0.488224	-0.419274	-0.348756	3
Q5SS00	-0.487062	-0.249789	1.20533	2
Q5SSZ5	0.234562	2.0763	0.302951	1
Q5SVI9	0.488224	-2.1835	-1.81364	3
Q5SW19	0.497996	0.966115	0.233639	1
Q60520	1.05931	0.975304	1.37166	2
Q60648	-2.3404	-1.87676	-2.30736	1
Q60709	0.459709	-0.680759	-0.124313	4
Q60715	-0.908387	-1.06459	-0.132819	2
Q60767	0.429589	0.872673	2.26474	2
Q60848	0.501378	1.26086	2.1671	2
Q60953	1.21944	1.99877	2.76921	2
Q61024	1.09057	1.17541	1.50955	2
Q61025	-1.89337	-1.46498	-1.39758	2
Q61070	0.670752	0.963926	0.60704	1
Q61090	0.699601	-0.585294	-0.0212353	3
Q61133	-0.433021	0.925901	0.995049	2
Q61142	-1.81891	-0.680438	-0.70475	2
Q61188	0.761199	1.05215	0.387569	1
Q61206	0.102265	-0.631984	-1.66193	3
Q61235	-1.58884	1.21908	0.553079	2
Q61263	0.402177	-1.67834	0.177095	4
Q61335	-1.58714	-1.84351	-1.32731	4
Q61425	0.834448	0.994776	-0.0673153	3
Q61474	0.488224	-1.66076	-1.68217	3
Q61510	0.161631	1.36036	1.28991	2
Q61543	0.418984	-0.205581	-0.427293	3
Q61584	0.557354	0.829642	0.915022	2
Q61655	-0.0677343	-0.338746	-0.247436	3
Q61686	-1.17038	-1.19109	-0.761231	2
Q62048	-0.933016	-2.20693	-2.37155	3
Q62165	-0.405603	-1.13523	-1.37359	3
Q62176	0.46333	1.10958	0.309256	1
Q62179	0.555068	2.06819	1.39941	1
Q62315	-0.27786	1.86282	1.88317	2
Q62318	0.602444	0.982482	1.31831	2
Q62347	-3.16969	-2.77146	0.271974	2
Q62348	-0.21107	-0.233914	-0.173619	2
Q62383	0.513458	0.961371	1.3313	2
Q62422	0.411205	2.17544	1.14549	1
Q62441	0.560621	1.45403	0.317949	1
Q62446	-1.30334	-1.35992	-0.476392	2
Q62470	0.862608	-0.413807	0.552954	4
Q62523	-1.99875	-2.6597	-2.05512	4
Q63810	-2.33866	-1.55745	-2.25862	1
Q64127	0.055748	1.04528	-0.463864	1
Q64337	1.17232	1.42419	0.636817	3
Q64449	0.488224	-1.05305	-2.71121	3
Q64514	0.18193	-0.328009	-0.0725278	4
Q64674	1.36573	1.14671	1.06393	3
Q64727	0.490714	-0.303022	-0.589162	3
Q69Z38	0.38091	1.62508	-0.274493	1
Q69ZN7	0.381244	3.24588	1.56141	1
Q69ZR9	0.774442	1.44038	1.53509	2
Q6A068	0.599514	0.876101	0.892475	2
Q6GV12	-1.49211	-0.693304	-0.351837	2
Q6IRU2	-1.16393	-1.60224	-0.622963	4
Q6J1H4	0.0984708	1.2793	2.45708	2
Q6NV99	0.882503	0.942449	1.31915	2
Q6NVF4	0.349754	0.951556	1.18229	2
Q6NVG5	0.43255	2.32486	2.85607	2
Q6NZB0	-2.74561	-2.18342	-1.44824	2
Q6NZQ4	0.887117	0.947172	1.21104	2
Q6P4T0	0.280821	1.14629	0.105156	1
Q6P549	-0.104778	-0.433956	-0.504796	3
Q6P5B5	0.697426	0.92609	0.727092	1
Q6P5E3	0.378079	0.85284	0.688721	2
Q6P5H2	0.766584	-3.50451	-3.14404	3
Q6P9J9	1.62334	1.18065	-0.363107	3
Q6P9P6	0.463542	1.04539	1.78865	2
Q6P9Q6	0.879674	1.0787	-0.41308	3
Q6P9R4	0.698872	0.84969	1.63741	2
Q6PA06	-0.136254	-0.645317	-0.391744	4
Q6PAL7	-0.0319315	0.8668	0.206835	1
Q6PCM1	-0.148128	1.12588	0.984883	2
Q6PCN7	-0.305627	0.988817	0.739973	2
Q6PDI5	-1.86533	-1.16663	-1.24197	2
Q6PFF0	-2.01007	-0.464781	-0.570924	2
Q6PGB8	-0.0592443	-1.59865	-1.99011	3
Q6PGG6	-1.10551	1.39364	1.11364	2
Q6PHU5	0.488224	-1.68838	-2.09817	3
Q6PR54	0.434093	1.09863	2.38598	2
Q6QI06	0.942046	1.16757	0.642816	1
Q6ZPE2	1.19575	1.1881	0.507841	3
Q6ZPY2	0.679169	1.10716	-0.199044	3
Q6ZQ73	0.464453	-0.395184	-0.439874	3
Q6ZQA6	0.337687	0.997992	0.120896	1
Q6ZWQ9	-3.06423	-2.67182	-1.82683	2
Q6ZWY9	0.0604146	-0.75268	-0.024216	4
Q76LV0	1.11131	1.59323	1.39754	1
Q78HU3	-0.804351	-1.48945	-1.24243	3
Q78IQ7	2.06851	3.07019	2.64753	1
Q78JE5	0.236827	1.02854	1.03089	2
Q78JW9	-1.85922	-1.33127	-1.73929	1
Q78RX3	-2.18661	-2.18667	-1.42801	2
Q78XF5	-1.17574	-1.4652	-1.49833	3
Q78XR0	-1.07104	-1.86747	-2.06115	3
Q792Z1	-4.49268	-4.36796	-3.94956	2
Q7JCX7	-1.50206	-1.25854	-0.974304	2
Q7JCY6	-0.993827	-1.08911	-1.35727	3
Q7JCY9	-2.08459	-1.79293	-1.71795	2
Q7TMI3	0.488224	-0.772097	-1.20464	3
Q7TMY7	-2.34255	-0.175874	-0.814751	2
Q7TN05	0.488224	-2.09993	-1.8203	3
Q7TNL7	-1.19464	2.35936	1.93134	2
Q7TPD0	0.779981	0.874266	0.799032	1
Q7TQ06	-1.92948	-2.30034	0.273497	2
Q7TSH3	0.488224	1.01088	0.868569	2
Q7TSV4	-0.234287	1.1084	0.611681	2
Q7TSY8	0.526772	1.3824	1.59058	2
Q80TR8	0.404499	0.94446	1.36613	2
Q80U44	-1.92038	-3.12805	-1.77307	4
Q80U70	0.976142	1.48477	1.82437	2
Q80U72	1.55102	1.39778	0.994128	3
Q80U93	0.604848	1.04986	0.643066	1
Q80U95	0.573393	0.898258	0.44839	1
Q80UM7	0.292964	-1.02704	-1.08428	3
Q80UV9	0.661456	1.09596	0.917935	1
Q80W00	-1.63615	0.885008	-0.962869	1
Q80W54	-1.18978	-1.62117	-1.69909	3
Q80WG5	0.612463	-0.678658	-0.777211	3
Q80WW9	0.86317	1.48086	0.797859	1
Q80X90	0.382178	-0.580321	0.829244	4
Q80XC6	0.419106	1.21651	1.23418	2
Q80XN0	0.682417	1.38536	-1.0617	3
Q80XQ2	0.488224	-1.11754	-0.772283	3
Q80Y17	0.43875	-0.219317	-0.332401	3
Q80Y98	0.783798	1.47562	1.38275	2
Q80YE7	-0.381434	-0.710716	-0.0207226	4
Q80YS6	0.267981	0.830258	0.506354	1
Q80ZK9	0.913699	1.87446	1.88619	2
Q80ZM5	-0.681381	-0.793963	-1.54808	3
Q80ZP8	-2.14657	-2.36774	-2.07078	4
Q80ZQ9	-0.734091	-0.233181	-0.0151364	2
Q80ZW2	2.59957	2.01531	2.28083	3
Q811J3	-1.73596	1.57451	-0.802511	1
Q811P8	0.193084	2.39586	0.329057	1
Q8BFP9	-0.236077	1.15093	1.3356	2
Q8BFR4	0.335807	-0.880157	-0.559608	3
Q8BFY9	0.117932	-0.19336	0.545292	2
Q8BFZ3	-1.39967	-1.63095	-0.914627	2
Q8BFZ9	-1.09303	-1.10134	-0.522235	2
Q8BGB5	-0.488859	-2.90105	-2.27084	3
Q8BGB8	-0.270625	-0.964614	-0.936898	3
Q8BGD9	1.01818	0.905277	1.08866	4
Q8BGM4	0.699991	-0.589493	1.53399	4
Q8BGQ7	0.743617	1.12848	0.663758	1
Q8BGS1	-2.06035	-1.13921	-1.78498	1
Q8BGT7	-1.7271	-1.28915	-1.12136	2
Q8BH04	1.72148	1.32921	0.294023	3
Q8BH40	-0.727273	-0.148411	0.336282	2
Q8BHC4	-0.211793	-0.319096	-0.529482	3
Q8BHE8	-0.619459	-1.06452	-1.82657	3
Q8BHG2	0.596691	1.60064	0.651302	1
Q8BHL3	0.852483	1.30389	0.748602	1
Q8BHX3	0.900477	1.03651	2.33702	2
Q8BHZ0	-0.261087	-0.699379	-1.06139	3
Q8BIA4	0.488224	-0.509056	-1.55672	3
Q8BIJ6	-0.0193614	-0.250165	-0.0532101	4
Q8BIW1	0.998315	1.28021	0.870451	1
Q8BJ03	-1.13309	-0.90259	0.353087	2
Q8BJZ4	-1.48267	-1.1783	0.0599459	2
Q8BKC5	-0.231148	-0.439881	0.120802	2
Q8BKE6	-1.4966	-1.54825	-0.996301	2
Q8BKG3	0.450254	-1.1153	-0.472853	3
Q8BLH7	-1.8365	0.951213	1.33774	2
Q8BMB3	-1.27122	-1.45103	-0.694194	2
Q8BMP6	-0.571478	-0.346338	-0.888261	1
Q8BMS4	-0.492635	-0.844422	0.271974	2
Q8BNU0	0.595268	1.22918	0.563024	1
Q8BP43	0.365414	-1.16647	-1.32469	3
Q8BP47	1.27884	1.07565	0.819263	3
Q8BPG6	0.836405	0.911147	-0.127668	3
Q8BQ33	0.291999	1.02224	1.69065	2
Q8BQ47	0.743008	-0.225511	-0.840072	3
Q8BR90	1.55925	1.33542	0.976574	3
Q8BRB7	0.857846	2.22248	2.2746	2
Q8BSN6	-1.03561	-1.91365	-1.6926	3
Q8BSZ2	-1.46439	1.21443	1.06038	2
Q8BTE5	1.13965	1.61282	1.09088	1
Q8BTS0	0.0212724	1.20387	0.153909	1
Q8BU31	-2.09964	-3.29674	-1.66321	4
Q8BUR4	-1.22528	-0.380241	-0.434035	2
Q8BVA2	-0.659275	-0.674955	-1.36868	3
Q8BVA5	-1.00356	-1.39376	-1.29764	3
Q8BW10	0.378816	0.965461	1.09022	2
Q8BWR2	-0.629969	-0.175728	0.390204	2
Q8BX02	0.332731	1.31194	0.08645	1
Q8BY87	-0.0434766	-0.370244	-0.644459	3
Q8BYH7	0.488224	-0.299817	0.146424	4
Q8BYK6	-0.756474	-1.4243	-1.56308	3
Q8BZA9	0.794013	1.42276	1.81987	2
Q8C0P0	0.246142	0.951806	1.90937	2
Q8C166	-1.09688	-1.98365	-2.19636	3
Q8C253	0.231959	2.61727	1.20303	1
Q8C2Q3	0.494688	1.19039	0.200003	1
Q8C3V4	-0.0437209	-0.801326	-1.08307	3
Q8C407	-0.885614	-1.07324	-0.840999	4
Q8C483	0.757395	1.32089	0.413983	1
Q8C4B4	0.395534	-0.272658	0.141069	4
Q8C570	-0.441385	1.41034	0.36208	1
Q8C5H8	1.36235	1.58633	0.492229	3
Q8C605	0.871118	2.07823	1.15313	1
Q8C6B9	0.784513	0.986028	0.865658	1
Q8C6I2	-2.3101	-2.13416	-1.29219	2
Q8C7V8	-1.18399	-0.685289	-1.12776	1
Q8C804	0.388108	0.79485	-0.0143026	1
Q8C845	-0.820309	-0.487105	-0.681148	1
Q8C9B9	0.0866717	1.3583	0.574993	1
Q8CBM2	-1.23957	-0.272286	-1.27029	1
Q8CDK8	0.488224	-1.71096	-0.767683	3
Q8CDM8	-0.222315	0.876222	0.458837	2
Q8CEC2	-0.599086	1.09361	0.879474	2
Q8CF02	2.15532	3.11154	2.60577	1
Q8CFA2	0.663305	1.16476	0.582914	1
Q8CFE2	-1.08916	-1.01151	-0.139867	2
Q8CFE6	-2.89098	-1.92369	-1.21563	2
Q8CG03	0.488224	-1.59428	-1.7405	3
Q8CGC6	0.781207	0.9401	0.769051	1
Q8CGP6	0.54662	-0.897002	-0.0498589	4
Q8CH25	0.486745	1.08071	-0.428954	3
Q8CI11	-2.20362	0.862363	0.346907	2
Q8CI75	-0.462263	-0.730686	-0.472081	4
Q8CIN4	-2.02574	-1.62675	-1.52927	2
Q8CJF7	-0.0930298	-0.49369	1.04371	2
Q8CJH3	0.488224	-2.40751	-1.62582	3
Q8JZN7	-1.45772	-1.37138	-1.71457	3
Q8JZQ2	0.813248	0.939844	0.383658	3
Q8JZX4	-1.84534	-0.915592	-1.04967	2
Q8K010	1.63744	2.23684	1.76314	1
Q8K183	0.853789	0.916191	0.656125	3
Q8K1L5	0.997239	1.03739	0.0397818	3
Q8K298	0.778013	1.2872	2.11165	2
Q8K2F0	-0.107313	-1.64485	-1.4037	3
Q8K2I4	0.190015	-0.513923	-0.927926	3
Q8K2Q7	-1.63657	-1.66536	-1.42925	2
Q8K2Y7	-1.58648	-1.55781	0.110677	2
Q8K354	1.95111	2.56896	3.37897	2
Q8K368	0.522521	1.03662	1.93772	2
Q8K389	0.560584	1.09893	1.25732	2
Q8K3F7	0.354477	2.22202	3.61024	2
Q8K3X4	-0.0324929	0.985567	0.293653	1
Q8K3Y3	0.0363272	-0.730439	2.81097	2
Q8K4L0	0.619165	1.11846	0.999517	2
Q8K4R9	0.387427	1.22767	1.44998	2
Q8R016	-1.74651	-0.472664	-0.259107	2
Q8R080	0.987529	2.08499	2.71488	2
Q8R0F6	-0.259594	-0.312865	0.0357435	2
Q8R0F8	-1.39688	-0.937668	-0.366417	2
Q8R146	0.498046	-0.489917	-0.634422	3
Q8R164	-0.707976	-0.996666	-1.86326	3
Q8R1A4	0.856681	-0.143144	-0.840555	3
Q8R1K1	-1.38258	-0.533709	1.34098	2
Q8R1V4	-0.889922	-1.22817	-1.72032	3
Q8R2U6	0.443843	1.27921	0.623585	1
Q8R2Y2	0.285811	0.985276	-1.22145	3
Q8R2Y8	-0.215801	-0.425765	-0.484289	3
Q8R349	-0.0943311	-2.09011	-1.08465	4
Q8R3B1	0.487499	1.32632	1.36512	2
Q8R3C6	0.52647	0.90881	1.11546	2
Q8R3F5	-0.737214	1.08693	-0.0922746	1
Q8R3U1	-1.91669	0.911733	1.19045	2
Q8R3W5	-0.168793	-0.530448	-0.46827	3
Q8R404	-1.10276	-0.604463	-1.12084	1
Q8R4N0	-2.37437	-2.28145	-0.648744	2
Q8R570	-0.736478	-0.843305	-1.55963	3
Q8R5C5	-1.02817	-1.40497	-1.67783	3
Q8R5J9	0.178999	-0.951762	-1.27307	3
Q8VBT9	0.502914	0.981995	0.807948	2
Q8VC65	1.29934	0.899182	0.613428	3
Q8VC88	0.0542223	1.02241	0.651622	2
Q8VCB1	0.963522	0.846468	1.2215	2
Q8VCD7	0.748258	1.32394	1.34196	2
Q8VCG3	0.910769	0.750101	0.918923	4
Q8VCL2	1.13136	0.946723	0.679264	3
Q8VCN5	1.57388	2.38284	1.4556	1
Q8VCP8	-1.55224	-1.42301	0.867519	2
Q8VCQ8	-2.39733	-0.668107	-0.815602	2
Q8VCT3	-1.2064	-1.32154	-0.985194	2
Q8VCW8	1.94718	1.47452	0.461993	3
Q8VD57	0.134859	-0.304848	-0.272126	3
Q8VD75	0.56224	-0.417626	-0.641219	3
Q8VDG5	-1.87914	1.01276	0.4321	2
Q8VDK1	-0.242834	-0.517266	-0.910718	3
Q8VDL4	1.35885	1.32541	-0.211135	3
Q8VDP3	0.694639	0.900441	0.250404	3
Q8VDV8	-0.527772	-0.764733	0.654535	2
Q8VE10	-1.16796	-1.38826	-0.331332	2
Q8VE73	-0.655166	-0.34464	-0.494582	1
Q8VE99	0.862537	1.20063	0.759996	1
Q8VEE0	-1.58953	-0.776528	-0.235642	2
Q8VHX6	-0.342971	-2.18192	-2.35148	3
Q8VI33	0.731059	0.914136	1.02709	2
Q8VI63	-1.46286	-1.25325	-1.89689	3
Q8VI86	-1.24371	-0.831138	-0.739781	2
Q91UZ5	0.863827	1.5743	2.06061	2
Q91V04	0.428003	-0.931088	-0.865679	3
Q91VI7	0.661825	0.890258	0.0371844	3
Q91VK4	0.488224	-2.57426	-1.26796	3
Q91VW5	0.528101	0.996141	0.122867	1
Q91W43	1.65037	1.45923	2.19491	2
Q91WF7	0.821429	0.961371	0.80437	1
Q91WK5	-0.751508	-0.559523	-0.304552	2
Q91WM3	0.932248	1.11333	1.17742	2
Q91WN1	-2.84151	-2.74228	-1.57986	2
Q91WS0	-1.40506	-0.56757	-0.739965	2
Q91XA2	-1.17858	-1.16049	-1.01275	2
Q91XC9	1.35851	1.30591	-0.256159	3
Q91XI1	0.488224	1.11991	0.806064	1
Q91YK2	0.923862	1.20672	1.67102	2
Q91YM2	-1.30407	-0.422173	-0.569175	2
Q91YN9	-2.1189	-2.23775	-1.30788	2
Q91YR9	0.414447	3.2118	1.61934	1
Q91YW3	-0.122243	-0.705709	-1.33616	3
Q91Z31	0.488224	-2.1584	-2.05644	3
Q91Z83	-2.34256	-1.98765	-3.07782	3
Q91ZA3	-1.17462	-0.846562	-0.653928	2
Q91ZX7	0.0101221	-1.42556	-1.88824	3
Q91ZZ2	0.517536	1.00532	0.515243	1
Q920Q6	-1.39387	-1.15494	-1.33033	1
Q921E6	0.515627	1.3184	0.693765	1
Q921I0	-0.119166	-0.583966	-0.534595	3
Q921I6	-2.46168	-2.42308	-1.08061	2
Q921J2	-2.24228	-1.93357	-1.70041	2
Q921J4	0.32046	1.44647	1.82835	2
Q921K2	0.227968	-0.312303	1.35074	2
Q921M7	1.22513	1.41811	1.03056	1
Q921N6	0.592347	0.759803	1.30007	2
Q921N7	0.518689	-0.867664	-1.17844	3
Q922J3	0.488224	-1.72443	-1.56978	3
Q922M7	-0.315258	-0.282427	0.0169195	2
Q922Q2	-1.98305	-1.39285	0.271974	2
Q922R5	-2.77239	-1.1058	-1.35683	2
Q922S8	0.66508	1.08991	1.86091	2
Q922Y1	0.825916	1.33078	1.44417	2
Q923D2	1.63021	1.25414	0.364772	3
Q923D4	-1.36503	-1.25352	-0.709179	2
Q923E4	0.091996	1.33678	1.9433	2
Q923W1	-0.867284	-0.844058	-0.319173	2
Q99J36	-2.42476	-2.46957	-0.83694	2
Q99J56	1.81912	1.00927	0.296851	3
Q99J93	0.53394	1.03615	1.40887	2
Q99JW2	1.02599	1.03487	0.410082	3
Q99JY9	0.0396547	-0.3365	-0.440698	3
Q99K46	0.34137	1.3567	-0.852633	1
Q99KC8	0.521185	-1.77201	-0.42658	4
Q99KH8	-1.7303	-1.60822	-0.876325	2
Q99KI0	1.2281	1.08356	0.29536	3
Q99L47	1.20158	0.986028	1.22985	4
Q99LB6	0.446068	0.908552	0.740597	2
Q99LI5	-0.363447	-0.962763	0.6672	2
Q99LN9	0.320607	1.20106	1.11156	2
Q99LP6	-1.11126	-0.662666	-0.55297	2
Q99LS3	1.35815	1.99176	0.35185	3
Q99M87	-0.0453365	0.901863	-0.499048	1
Q99MR1	0.599071	0.831366	0.799301	2
Q99MR6	0.561359	0.902339	0.716611	1
Q99MV7	-0.201657	1.67394	2.61097	2
Q99N96	-1.07801	-1.24973	-1.35978	3
Q99NF8	-0.11976	1.20904	1.63733	2
Q99PG2	0.462132	-0.608768	-0.751512	3
Q9CPN8	-1.17322	-1.93876	-1.26102	4
Q9CPP6	-3.31019	-2.44515	-2.60868	2
Q9CPQ8	-1.86543	-1.61579	-1.60108	2
Q9CPT4	-1.30734	-1.82707	-2.11091	3
Q9CPW2	0.941083	0.916915	0.675699	3
Q9CPY1	-1.85563	-2.4097	-1.47001	4
Q9CPY7	0.223361	0.996722	0.958967	2
Q9CQ01	-0.780745	-2.1678	-1.90363	3
Q9CQ21	-0.871121	-0.875268	-0.692931	2
Q9CQ39	-0.625207	-0.501854	0.268949	2
Q9CQ54	-2.09775	-2.05235	-2.05778	2
Q9CQ71	-1.59257	-1.2721	-0.701076	2
Q9CQA3	0.586121	1.05786	0.0851151	1
Q9CQA6	-1.35595	-0.985238	-0.949756	2
Q9CQA9	0.245363	-1.33889	-1.48011	3
Q9CQC8	-1.23077	-0.778481	-0.137998	2
Q9CQH8	0.687286	-0.568544	1.26251	4
Q9CQI3	-2.42858	-1.88978	-1.59368	2
Q9CQI9	0.737612	0.907424	0.738042	1
Q9CQJ6	-2.29689	-1.54033	-1.35936	2
Q9CQM2	0.463085	-0.241533	-0.67995	3
Q9CQN7	-2.10367	-1.52311	-1.83785	1
Q9CQP0	-1.9514	-1.46606	-1.44881	2
Q9CQS7	0.283702	2.68881	3.3696	2
Q9CQT1	0.506103	0.882287	0.831507	2
Q9CQU0	1.93971	0.877975	-0.703925	3
Q9CQU5	-2.53878	-1.53778	-1.53755	2
Q9CQV6	-0.816866	-0.896727	-1.28693	3
Q9CQW9	0.317899	0.758441	1.53729	2
Q9CQZ0	0.36046	-0.199865	-0.0355856	3
Q9CQZ5	-1.59546	-1.20746	-1.32874	2
Q9CR02	-2.08459	-2.81951	-1.55907	4
Q9CR11	-0.973486	-1.28753	-0.716899	4
Q9CR39	-1.90663	-0.649508	-1.14126	1
Q9CR95	-0.619276	0.962948	0.218227	1
Q9CRB9	-1.40675	-1.05128	-1.45897	1
Q9CS42	-0.0662874	-0.210477	-0.839148	3
Q9CSH3	-0.234647	-0.120222	0.399403	2
Q9CVB6	-0.00101499	-0.247895	-0.479366	3
Q9CWG8	-0.338316	-0.937187	-0.252279	4
Q9CWH0	0.979947	1.71903	2.44479	2
Q9CWN7	-1.21455	-0.693815	-0.251857	2
Q9CWQ0	-0.116265	-1.23845	0.168729	4
Q9CWR8	-0.14453	2.4537	3.03287	2
Q9CWY6	0.917917	0.911991	1.17982	2
Q9CX13	0.58054	-0.191666	0.0255552	3
Q9CXE7	-0.696308	-1.30433	-1.88078	3
Q9CXK8	0.830032	0.844464	0.543179	3
Q9CXL3	-0.511936	-1.37563	-0.0839547	4
Q9CXU0	-2.28781	-1.8337	-1.56652	2
Q9CXV1	-1.28573	-0.988837	-0.0692281	2
Q9CY62	0.81564	1.31702	0.981361	1
Q9CY64	-0.951544	1.00647	-1.46645	1
Q9CYN9	1.08483	1.00638	0.84146	3
Q9CZG3	-1.90132	-1.25879	-0.911403	2
Q9CZH3	-1.95099	-0.858351	-0.888252	2
Q9CZJ1	0.520744	1.40895	-0.40789	1
Q9CZN7	0.968207	1.43487	0.319452	1
Q9CZW4	0.676384	-1.52177	-1.2434	3
Q9CZX7	0.798487	-0.258305	-0.126831	3
Q9D020	0.623183	-1.03329	-1.17631	3
Q9D023	-1.067	-2.0326	-1.45078	4
Q9D071	0.481341	0.945888	0.770642	2
Q9D091	-0.504919	-0.576185	-0.442959	4
Q9D0E1	0.362377	0.931627	-0.0778973	1
Q9D0F9	1.73841	0.970905	-0.38998	3
Q9D0J4	-1.2928	-1.28406	-0.501972	2
Q9D0M5	-0.0265344	-0.500511	-0.603492	3
Q9D0R2	1.49309	1.33233	1.14319	3
Q9D0S9	0.372926	1.01925	-0.0738823	1
Q9D104	-1.46523	-1.1524	-1.27672	1
Q9D162	0.0820555	-1.29577	-0.228124	4
Q9D187	0.457199	0.957141	0.658471	1
Q9D1B9	-0.26217	-1.17156	-0.840369	3
Q9D1G1	-0.922555	-1.11171	-0.985605	4
Q9D1H6	-2.40981	-2.98911	-1.68505	4
Q9D1K2	0.687309	0.901733	0.541408	1
Q9D1L0	0.596369	1.11619	0.787959	1
Q9D1L9	-0.190572	-0.361253	-0.51281	3
Q9D1M4	0.728268	0.884036	0.695869	1
Q9D1R2	1.18695	1.19882	0.905067	3
Q9D1R9	-2.59343	-2.24298	-1.59064	2
Q9D2D7	0.858283	-2.12086	-1.12276	3
Q9D2Q2	1.28895	0.976623	1.42908	4
Q9D2U9	-1.24056	-2.89428	-2.13138	3
Q9D2V7	0.903586	-0.33351	-0.571081	3
Q9D365	-1.91721	-2.2389	-1.28791	2
Q9D3B1	-1.01287	-1.27389	-0.926793	4
Q9D3N8	-1.36672	1.67749	-2.48719	1
Q9D4G5	-1.02249	1.42632	1.57172	2
Q9D517	0.488224	-3.11794	-1.87633	3
Q9D666	0.789246	1.47506	1.17768	1
Q9D6K8	-3.30511	-2.61391	-2.99064	1
Q9D6S7	-0.398447	-0.64158	-1.37543	3
Q9D6V8	-0.307681	-0.177519	0.0317971	2
Q9D6Z0	0.683937	1.33276	0.780137	1
Q9D7N6	-2.86586	-2.11367	-1.91076	2
Q9D7P6	-1.51207	-1.20339	-0.894153	2
Q9D7V9	1.91768	1.11171	0.599859	3
Q9D7X8	-2.36497	-1.88355	-0.231541	2
Q9D826	-1.18489	1.29217	1.45323	2
Q9D881	-2.18544	-1.95485	-1.46853	2
Q9D892	-0.861824	-0.914048	-0.926818	3
Q9D8C3	-0.155205	1.6014	2.87641	2
Q9D8S4	-2.49082	-2.6715	-2.08691	2
Q9D8Z6	0.0788532	1.2337	1.41113	2
Q9D903	0.882398	1.25098	1.98267	2
Q9D937	-1.14871	-1.07912	-0.678978	2
Q9D958	-4.24536	-3.21098	-3.12957	2
Q9D967	0.907815	-0.181257	-0.396773	3
Q9DAA6	-0.717023	-1.13674	0.826681	2
Q9DAM7	-1.15438	-1.58325	-1.64315	3
Q9DAU1	-1.49541	-2.63998	-1.5077	4
Q9DB10	-0.139385	-0.69661	-0.0781963	4
Q9DB34	0.914974	1.13191	1.42474	2
Q9DB96	0.430344	0.880176	0.929379	2
Q9DBC7	-0.100424	-0.65377	-0.515889	3
Q9DBD5	0.889693	0.94605	1.27231	2
Q9DBE9	0.669362	0.973984	1.3348	2
Q9DBF1	0.141354	-0.193171	-0.133682	3
Q9DBG9	-0.346798	-1.60279	-1.93542	3
Q9DBH0	0.0182635	0.912302	0.963527	2
Q9DBR0	0.359124	1.07991	0.345724	1
Q9DBR7	0.442616	0.90838	0.590355	1
Q9DBW3	0.209693	0.918329	0.35743	1
Q9DC23	0.247342	-0.272	-0.604045	3
Q9DC50	-1.68187	-1.98235	-1.69971	4
Q9DCA5	0.847177	1.35537	1.84587	2
Q9DCC4	1.68273	1.01806	-0.548881	3
Q9DCC5	-4.49131	-4.04778	-2.97649	2
Q9DCD0	0.888054	1.07186	0.605499	3
Q9DCH2	0.849755	0.945334	0.921026	2
Q9DCN2	1.87443	1.55036	0.682566	3
Q9DCT5	0.150642	-0.271907	-0.599651	3
Q9DD02	0.909044	1.00735	0.409266	3
Q9EP72	-0.386067	-0.550497	-0.744945	3
Q9EP97	0.816148	1.29179	1.37304	2
Q9EPB4	0.855508	1.17593	2.87087	2
Q9EPQ8	0.688044	1.40447	1.60284	2
Q9EQ80	0.0662523	-0.448721	0.0322493	4
Q9EQF6	0.488224	-2.23659	-2.85071	3
Q9EQH2	0.488224	-2.77762	-1.3728	3
Q9EQX4	0.488224	-2.63261	-2.66696	3
Q9ER67	0.488224	-0.64459	-1.54235	3
Q9ER72	0.547096	1.08903	0.900832	2
Q9ERG0	2.15159	1.63168	2.12384	4
Q9ERR7	-1.59791	-1.80253	-2.05345	3
Q9ES34	0.488224	-0.686329	-0.160292	3
Q9ES52	-1.94624	2.66792	-0.68229	1
Q9ES97	-0.445893	-1.10659	-0.797163	3
Q9ESW8	0.793744	0.977189	-0.376752	3
Q9JHP7	-1.75564	-2.1976	-0.821277	2
Q9JHW4	-1.41302	-0.697632	-0.11969	2
Q9JI75	1.35448	1.35435	0.289503	3
Q9JIB0	0.785198	1.18838	2.04875	2
Q9JIH2	-1.22189	-1.32607	-0.322172	2
Q9JII6	1.54914	1.58979	0.0904663	3
Q9JIM1	0.611094	2.04202	2.69101	2
Q9JIX0	-2.20413	-1.79266	-1.49105	2
Q9JJ28	0.163871	-0.336547	-0.473488	3
Q9JJG6	-3.21629	-4.21431	-3.30667	4
Q9JJU8	-1.99283	-2.09029	-2.74856	3
Q9JJV2	-0.380678	-1.77171	-2.66401	3
Q9JKK1	0.180314	-0.517513	-0.811767	3
Q9JKX6	-1.64448	-1.96015	-1.08459	2
Q9JKY5	0.488224	-0.450299	-1.05559	3
Q9JL35	-2.96785	-2.86735	-2.02389	2
Q9JL62	-2.08459	-2.65963	-2.28057	4
Q9JLZ6	0.609741	0.79198	1.9278	2
Q9JM62	1.29253	1.27598	-1.29629	3
Q9JM76	-0.431399	-0.14667	-0.448011	1
Q9JMH6	0.647638	0.93486	0.970893	2
Q9JMH9	0.999438	1.48613	-0.0970849	3
Q9MD68	-1.62102	-1.28664	-1.3064	2
Q9QUJ7	-0.865728	-0.98454	-0.848307	4
Q9QWT9	0.278277	1.28147	1.31452	2
Q9QXS1	1.38391	0.869669	0.447007	3
Q9QXS6	-0.387104	-2.74642	-2.88509	3
Q9QY81	0.436074	-0.321464	0.0546123	4
Q9QYE6	0.380529	0.863564	0.267563	1
Q9QYI3	0.295657	1.28224	1.21796	2
Q9QYY0	0.0339858	1.5373	-0.220315	1
Q9QZ08	0.723674	1.36942	-0.133871	1
Q9QZD8	0.111602	-1.59996	-1.72275	3
Q9QZF2	0.488224	-1.62461	-1.80446	3
Q9QZM0	0.229463	-0.728162	-0.313177	3
Q9QZQ8	-1.01405	-1.82795	-0.952245	4
Q9QZV9	-0.670355	-0.378322	-0.639703	1
Q9R061	0.624293	0.859502	0.794351	2
Q9R069	0.0449783	-0.236917	-0.0748395	4
Q9R0P5	-2.48166	-2.19189	-1.8369	2
Q9R0Q6	-0.754811	-1.57138	-0.914612	4
Q9R0X0	-0.0917532	0.794468	-0.17572	1
Q9R0Y5	0.155288	1.9186	-0.420375	1
Q9R1T4	0.488224	-1.50682	-1.19651	3
Q9WTI7	0.472911	1.04227	0.545419	1
Q9WTK5	0.488224	-0.610584	-1.0987	3
Q9WTN0	-0.647281	-1.61759	-1.1441	4
Q9WTP7	-1.94684	-2.27179	-1.42582	2
Q9WU28	-1.29422	-1.08467	-0.777017	2
Q9WU84	0.696633	0.912764	1.14031	2
Q9WUM5	-1.43415	-1.48166	-2.02517	3
Q9WUR9	1.84839	1.89347	1.35289	3
Q9WUU7	-0.602664	-2.01423	-1.49925	3
Q9WV03	-0.592789	-1.40918	-0.135777	4
Q9WV32	-1.74317	-1.86128	-1.05538	2
Q9WV54	0.814972	-0.191414	-0.297175	3
Q9WV85	-0.350661	-0.543611	-0.262088	4
Q9WV92	0.488224	-1.63304	-0.978369	3
Q9WV96	-0.350529	1.00823	0.129059	1
Q9WV98	-1.67089	-1.5717	-1.29069	2
Q9WVK4	1.0076	0.9916	0.925742	3
Q9WVL3	0.889483	0.864588	1.02213	2
Q9Z0J0	-1.28848	-1.9162	-1.96299	3
Q9Z0N2	-0.810687	-0.560848	-0.190581	2
Q9Z0P5	0.945835	2.19153	1.61244	1
Q9Z110	0.960911	0.865362	-0.0486429	3
Q9Z127	1.18556	1.13133	1.06017	3
Q9Z130	-1.2144	-1.70393	-0.374753	2
Q9Z1F9	0.326697	0.864948	1.01877	2
Q9Z1N2	0.572202	1.13099	1.38237	2
Q9Z1P6	-2.56434	-1.87088	-1.74731	2
Q9Z1Q5	0.783996	-0.646582	0.0371756	4
Q9Z1S0	0.286948	1.1764	1.98619	2
Q9Z1Z2	-1.62892	-1.53616	-1.06596	2
Q9Z210	0.628791	0.814077	0.380443	1
Q9Z262	1.48228	-1.09409	0.158297	4
Q9Z2H5	-0.791988	2.31828	1.29453	2
Q9Z2M6	0.74156	1.60555	1.5096	2
Q9Z2V5	0.93036	0.987268	0.996867	2
Q9Z2X2	-2.32303	-2.59499	-0.0273622	2
Q9Z2Y8	-1.61661	-1.26201	-1.23439	2
Q9Z2Z6	1.79724	2.03084	0.22022	3
Q9Z2Z9	0.526006	1.26233	0.0832157	1
Q9Z321	0.962746	1.43573	1.62252	2
S4R291	-2.61877	-0.593438	-1.06297	2
V9GWU7	0.907493	2.30381	1.53293	1
V9GXI7	-3.09305	-1.79808	-2.50253	1
Z4YKC4	-1.43476	-2.21046	-1.32739	4
Z4YKV1	0.422809	-2.71075	-1.268	3
A0A087WNL7	0.669197	0.124185	0.422931	4
A0A087WP74	-2.05324	-0.496979	0.921345	2
A0A087WQ16	-0.879564	0.312423	0.999554	2
A0A087WQB0	-1.11922	0.075482	-0.158568	2
A0A087WQD8	-3.70056	-1.96788	0.271974	2
A0A087WQE6	0.575697	0.441439	0.34533	3
A0A087WQN7	-0.565589	-0.0689028	-0.265147	1
A0A087WQS2	-3.28533	-0.13414	0.125273	2
A0A087WQS5	0.45866	-0.135554	0.28373	4
A0A087WR24	0.119842	-0.266031	-0.575152	3
A0A087WRF2	0.731472	-0.0583489	-2.12532	3
A0A087WS96	-0.857046	-1.15345	-0.773731	4
A0A0A0MQ73	0.853617	0.673188	1.24741	2
A0A0A0MQD5	0.537572	0.819661	0.545144	1
A0A0A0MQE5	0.187883	0.702197	0.157242	1
A0A0A0MQF5	0.386244	0.498624	0.555471	2
A0A0A0MQF6	0.506647	0.432113	0.621155	2
A0JNY3	-0.363447	-1.65275	-1.61015	3
A1BN54	1.15569	0.59202	0.955276	4
A2A432	0.557139	0.497082	1.45708	2
A2A4A6	0.675986	0.25129	0.0738572	3
A2A4P4	0.292071	-0.0248992	0.0745186	3
A2A547	0.568651	0.254727	0.83029	4
A2A654	0.300211	0.42091	0.963522	2
A2A6A1	-0.859627	-0.380384	-0.507046	2
A2A6Q5	-2.41242	0.319131	-0.721046	2
A2A6U3	-0.628296	0.039986	-0.519984	1
A2A791	0.624623	0.481686	0.953395	2
A2A7F4	-0.496851	0.0523323	-0.755427	1
A2A7F6	0.874787	0.574917	-0.934877	3
A2A7S8	-0.0798775	1.08896	1.06786	2
A2A7T8	0.178024	0.443065	1.05302	2
A2A841	-0.655046	-0.871862	-0.679723	4
A2A8U2	0.828825	0.595665	0.120779	3
A2A9C3	-0.220206	0.557576	-0.94121	1
A2A9I0	0.397785	0.307094	-0.334516	3
A2A9P6	1.46924	0.546081	0.904417	3
A2A9W7	-0.257141	-1.26418	-1.00793	3
A2ABV5	-0.474759	0.348067	0.218499	2
A2ABY3	0.156484	-0.445865	0.0677512	4
A2AC07	0.400435	0.724321	1.56116	2
A2ACC6	0.488224	-0.221947	-0.119336	3
A2ACG7	0.734703	0.42504	-0.0924547	3
A2ACM0	0.578382	0.563688	-0.00741954	3
A2AD03	-1.23803	-1.46212	-1.26907	4
A2ADB1	-0.0323311	-0.624591	0.126601	4
A2ADR8	0.45672	0.621918	0.445456	1
A2ADY9	-0.105464	0.334364	0.252475	2
A2AE27	0.70523	0.356181	0.065416	3
A2AFF6	0.670166	0.218306	0.152695	3
A2AFQ0	0.232449	-0.0171506	0.754684	2
A2AFQ9	0.702224	0.521858	1.22695	2
A2AG68	0.745019	0.402317	-0.47798	3
A2AGH8	-0.831673	0.375001	0.230812	2
A2AGS6	-0.0454492	-1.14705	-1.87105	3
A2AH22	0.649123	0.659974	0.580046	3
A2AH25	-0.737356	-0.360859	-0.497428	2
A2AI52	0.452163	0.557321	0.598307	2
A2AIH8	-2.04691	-0.940356	0.271974	2
A2AJG0	-1.1851	0.0278551	-0.131679	2
A2AL50	0.54352	0.326998	0.388731	3
A2ALA6	1.06464	0.211549	-0.0185306	3
A2AMC3	0.156404	-1.03469	-1.18312	3
A2AMH5	1.1336	-0.0854638	1.47955	4
A2AMQ5	0.633089	0.520127	0.0108499	3
A2AMY5	0.371001	0.630929	0.0509926	1
A2AN08	0.332781	-0.00735769	1.04507	2
A2ANY6	0.320942	0.201296	2.66122	2
A2AP32	0.53758	0.320997	-0.115275	3
A2AQ17	0.561398	0.262413	0.0852943	3
A2AQ19	-1.06105	0.767055	0.461102	2
A2AQA7	0.34698	0.513468	0.778221	2
A2AQR0	0.374505	0.264486	1.42299	2
A2AR02	-0.786111	0.430817	0.47223	2
A2AS98	0.422189	0.205112	0.245178	3
A2ASS6	-1.53048	-2.12095	-1.33862	4
A2AT37	0.17877	0.505325	0.628616	2
A2ATI9	-0.136017	-1.0539	-0.670017	3
A2ATU0	0.445189	0.664564	0.716543	2
A2AVJ7	0.548489	0.207307	-0.704197	3
A2AWA9	-0.0441811	-0.964003	-0.126224	4
A2AWT5	1.21955	0.061762	-1.06735	3
A2BDX0	0.182366	0.577333	-0.146103	1
A2BDX3	-0.0619853	0.372695	1.16005	2
A2BE28	0.727424	0.763049	1.19177	2
A2BE93	0.665695	-0.102267	1.19136	4
A2BGI8	0.518014	0.597233	0.411731	1
A2BGN7	0.119792	0.153974	-0.549575	3
A2BIE1	-0.87754	0.0140995	-0.674478	1
A2CG76	0.410254	0.0992176	-0.149067	3
A2RSX9	-0.951249	-1.4219	-1.52526	3
A2RSY1	-1.21191	-0.745599	-0.72496	2
A2RTH5	0.902758	0.603878	0.364262	3
A3KFU5	-1.25446	-1.24815	-1.31041	3
A3KG93	0.55675	0.618238	0.936006	2
A3KGQ6	0.539154	0.193294	-0.106455	3
A6H5Y3	-0.758512	0.492447	-0.129794	1
A6H5Z3	-0.408496	0.121105	0.0861312	2
A6H611	0.575069	-2.76031	-1.43361	3
A6H8H2	0.982484	0.659138	0.238275	3
A6PWX8	-1.38785	0.0256108	0.0609341	2
A6ZI44	0.794904	0.728263	1.33444	2
A7TU71	0.983412	0.377495	0.852694	4
A8C756	0.342874	0.449497	0.858224	2
A8Y5G9	0.447524	0.480157	0.755311	2
A8Y5K6	-0.436968	-0.497843	-0.667672	3
B0QZN5	0.540129	1.02312	-0.68456	3
B0R091	0.939463	0.281632	-0.152382	3
B0V2M3	-0.45466	0.77708	0.169586	1
B1AQF4	0.0772795	-0.116666	-0.390597	3
B1ARU4	0.396417	0.614539	1.68406	2
B1ASU9	0.253461	0.500955	0.847107	2
B1AT82	1.16819	-0.377073	-0.448388	3
B1ATD5	0.319178	0.585669	0.440419	1
B1ATZ0	0.237602	0.45961	-0.17572	3
B1AU25	-0.0631839	0.681218	-0.116307	1
B1AU75	0.643788	0.491256	1.54947	2
B1AUN3	-0.344139	0.678337	0.776864	2
B1AUR6	-0.557536	0.709285	1.28343	2
B1AUY7	-1.20959	-0.742787	0.430343	2
B1AV77	0.64515	0.427248	-0.0969029	3
B1AWE0	0.463458	0.421838	0.311812	3
B1AWL2	0.490954	0.686618	0.0822143	3
B1AXI9	0.640681	0.809435	0.261484	3
B1AXP6	0.614036	-0.399469	-0.538963	3
B1AYU7	1.10306	0.597245	0.646391	3
B1AZI6	0.469356	0.333943	0.226023	3
B1B1D8	0.416279	0.393653	0.124774	3
B2KGA7	-1.67105	0.281599	-0.880938	1
B2LVG5	-1.59232	-0.24288	-0.811965	1
B2M1R6	0.444443	0.230905	0.374165	4
B2RQ57	-1.31292	-1.68156	-1.3619	4
B2RQC6	0.623432	0.224854	0.855839	4
B2RQG2	0.186023	0.878326	0.503387	1
B2RR83	-0.742543	-1.52182	-1.58077	3
B2RRE7	0.40108	0.673967	1.03056	2
B2RT41	0.250534	-0.00461246	-0.543475	3
B2RUR8	-1.87753	-1.25032	-1.6153	1
B2RXC1	0.412532	0.849747	0.598845	1
B2RXC6	0.148014	0.661022	0.847221	2
B2RXS4	0.573696	-0.0987909	0.0607391	3
B2RY04	0.227968	0.252863	1.53335	2
B2RY56	1.28005	0.818008	0.722585	3
B7FAU9	0.62045	0.0647111	0.0236492	3
B7ZCJ0	0.682822	0.648748	-0.0991139	3
B7ZCL8	-0.310226	0.499852	-0.735467	1
B7ZNY3	0.488224	0.00610362	-0.499696	3
B9EHJ3	0.139003	0.315554	0.106328	1
B9EJ22	0.456482	-0.0160992	-1.60082	3
B9EJ54	0.739902	0.392611	0.789396	4
B9EJ80	-0.389804	-0.00421741	-0.94143	1
B9EJR8	0.45083	0.460592	0.832202	2
B9EKI3	0.422427	-1.55687	0.171205	4
B9EKJ3	0.0637167	0.346619	-0.300081	1
B9EKS2	0.487489	-0.671586	0.440183	4
D3YTR4	0.598993	0.643887	0.90546	2
D3YTR6	0.299729	-0.0845877	0.699113	4
D3YTT4	-0.315861	0.252198	-0.645745	1
D3YU17	0.815491	0.403185	0.236693	3
D3YU58	0.288749	0.370435	0.589891	2
D3YUM1	0.505377	0.450697	-0.0792574	3
D3YUW8	0.630151	0.156818	0.52284	4
D3YVM2	-1.29374	-0.85782	0.291602	2
D3YVM8	-0.885541	-0.342502	-0.501906	2
D3YW42	0.774581	0.710768	0.496043	3
D3YW48	-1.89565	-1.45976	-0.589306	2
D3YWK1	-1.44965	-1.64479	-1.31281	4
D3YWS7	-1.43919	0.407663	0.776407	2
D3YWS8	0.896259	0.843392	0.165784	3
D3YWT0	0.932901	0.123904	-0.264886	3
D3YWT1	0.78271	-0.570816	-0.846445	3
D3YWY6	-1.87234	-0.0825358	-3.08409	1
D3YXP6	0.524897	0.540837	0.400826	3
D3YXW1	-0.283777	0.74683	-0.0544301	1
D3YYT1	-0.622832	-0.341796	-0.589215	1
D3YYW8	-2.09947	-0.728371	0.52942	2
D3YZ62	-0.0899158	-0.0799447	-0.702684	3
D3YZC7	0.181974	-0.471761	-0.281606	3
D3YZP9	0.475919	0.116969	0.302415	4
D3YZZ5	0.476649	-0.0497178	-0.476011	3
D3Z030	0.589757	0.230923	0.980039	4
D3Z0F5	0.17815	0.234419	-0.0315981	3
D3Z131	0.643164	0.682949	0.618666	1
D3Z136	-1.28177	-1.11711	-1.30245	1
D3Z2H9	0.021966	0.000912245	0.370762	2
D3Z2J3	0.247972	0.861883	0.299814	1
D3Z2J4	-0.0982014	-0.832846	-0.472566	4
D3Z2K2	0.566185	0.374212	0.128395	3
D3Z3C1	0.648579	-1.5319	0.899035	4
D3Z4P2	-1.49903	-1.23626	-1.64748	1
D3Z4S3	-1.80734	-1.72758	-2.11302	3
D3Z4V1	0.567073	0.679007	0.734246	2
D3Z5F7	0.447794	0.234666	0.375024	4
D3Z5I1	1.7395	0.279064	0.285782	3
D3Z5I9	-1.44707	-1.87598	-0.949109	4
D3Z5N6	-1.37131	0.297803	0.467815	2
D3Z5P5	0.579082	0.502435	0.912037	2
D3Z5Y5	0.69854	-0.0104728	-0.309814	3
D3Z600	-0.0561089	1.03557	0.371614	1
D3Z645	0.383072	0.439441	0.192598	3
D3Z656	-1.52482	0.322121	-0.0569386	2
D3Z684	0.422006	0.582777	0.961778	2
D3Z6H3	-0.197009	0.517911	-1.56534	3
D3Z7B5	-0.205997	0.332067	-0.717414	1
D3Z7E5	-1.04266	0.561978	0.0233876	2
D3Z7L2	0.726162	0.837947	0.988202	2
D3Z7P3	-1.57889	-0.0770441	-0.550576	2
D3Z7V3	0.347864	-0.429325	0.0677657	4
D6RCK1	0.377387	0.535458	0.711411	2
D6RI20	-0.0494546	-0.964429	-0.850985	3
E0CX20	0.0766156	0.813774	0.599429	2
E0CXA9	0.156352	0.122861	-0.213753	3
E0CYH4	0.0639074	0.227294	0.230813	2
E0CZ04	0.220153	0.596004	-0.0319625	1
E0CZ72	0.371214	0.25776	-0.176967	3
E0CZE0	0.511957	0.227792	-0.00431063	3
E9PU93	-0.624269	-0.670585	0.466213	2
E9PU96	0.744711	0.846654	1.63602	2
E9PUA2	0.760888	0.363267	-0.445655	3
E9PUB7	-1.01625	0.572559	1.14234	2
E9PUE7	-0.772984	-2.39296	-0.348463	4
E9PUM4	0.418026	0.858876	-2.1618	3
E9PUQ5	-0.32588	0.596873	-1.03044	1
E9PUQ9	-0.224326	0.668618	0.727501	2
E9PV12	0.172195	0.0865483	-0.345714	3
E9PV22	0.385635	0.558694	0.115386	3
E9PV45	1.07654	0.819172	0.925263	3
E9PV80	0.488224	-1.78819	-1.31105	3
E9PVA6	-0.36799	0.672866	-0.274226	1
E9PVA8	0.218075	-0.0122584	0.0912141	3
E9PVC5	0.38178	0.521859	0.412912	1
E9PVN6	-0.0885082	-0.0685802	-0.218311	3
E9PVZ8	0.347458	0.496161	-0.247156	3
E9PW03	1.0176	0.402317	-0.0208433	3
E9PW20	0.75794	-0.395827	0.941585	4
E9PW66	-0.982085	0.0680612	-0.807962	1
E9PWD9	0.299594	-0.0995722	0.46821	4
E9PWG6	0.35855	0.405926	1.04707	2
E9PWI6	-0.0183828	0.391209	-0.188347	1
E9PWS4	0.865221	2.37191	2.92055	2
E9PWW9	-0.268949	-1.52562	0.271974	4
E9PWY9	0.536476	0.418789	0.399103	3
E9PX53	0.571225	0.551436	0.104837	3
E9PXB7	0.500058	0.801315	0.321573	1
E9PY39	0.204878	0.109898	0.0240559	3
E9PY90	0.438551	-0.0886077	-0.0643051	3
E9PYE2	-0.522958	-0.353852	-0.294833	2
E9PYF4	-0.149488	-0.660184	-0.434928	3
E9PYG6	0.05139	-0.825977	-0.434412	3
E9PYH2	-0.840243	0.0357149	-1.05643	1
E9PYH6	0.352875	0.591735	0.513877	2
E9PYI8	0.694118	0.564898	0.638417	4
E9PYJ6	0.524171	0.352626	0.556146	4
E9PYL2	-0.286527	0.330557	0.0480886	1
E9PYN1	0.224995	-0.146173	-0.719681	3
E9PYP2	0.249767	-0.0554476	0.267025	4
E9PYT0	-0.0826169	0.475789	0.68216	2
E9PYT3	1.09006	-0.41764	0.189228	3
E9PYZ7	0.068921	0.306474	0.195361	1
E9PZ16	0.61577	0.503658	0.636755	4
E9PZF0	-1.72914	-1.22407	-1.25644	2
E9PZJ8	0.522171	0.386111	0.226367	3
E9PZS8	-1.59062	-1.36439	-0.808521	2
E9PZY8	0.655829	0.63648	0.67043	4
E9Q0A7	0.00793012	1.13617	-0.231177	1
E9Q156	0.348868	-0.330946	-0.0634676	3
E9Q175	1.27286	-0.00944747	0.802609	4
E9Q179	0.290439	-0.11533	-0.0588435	3
E9Q186	0.604209	0.763132	1.37948	2
E9Q1G8	0.189139	0.0930881	-0.476366	3
E9Q1M6	0.680186	0.690576	0.479961	3
E9Q1S3	0.223115	0.437598	-0.775576	3
E9Q1V5	0.603829	0.60308	1.12307	2
E9Q1V9	0.488224	-1.39697	-2.79208	3
E9Q1W7	0.0954881	-1.79928	-1.14945	3
E9Q236	0.567016	0.625128	1.76717	2
E9Q284	-0.13253	0.460727	0.653262	2
E9Q286	-0.681872	-0.905588	-0.453442	4
E9Q2E4	-1.65303	0.423221	-0.938478	1
E9Q2H1	0.179945	0.595664	1.25236	2
E9Q2U6	0.218222	0.410841	0.324293	1
E9Q317	0.0175695	0.44959	0.604854	2
E9Q3F7	0.51504	0.461174	0.974102	2
E9Q3L2	0.794526	0.816142	0.5209	3
E9Q3M3	0.400707	0.149839	-0.51666	3
E9Q3P4	-0.468108	0.0267266	1.76203	2
E9Q3Y4	0.217794	0.255614	0.0565306	3
E9Q411	0.524554	0.236366	-0.641908	3
E9Q447	0.854601	0.666882	-0.175231	3
E9Q456	1.46529	0.648143	0.756082	3
E9Q474	-0.0290396	0.4027	-0.562465	1
E9Q481	0.0733666	0.367726	0.375526	2
E9Q4F7	0.395859	0.548286	0.479571	1
E9Q4K9	0.347412	0.730401	0.699178	2
E9Q4M4	0.253582	-0.844097	0.686837	4
E9Q4Q2	0.666267	0.607417	0.69337	4
E9Q4Z2	1.38523	0.608066	-0.983653	3
E9Q512	0.621781	0.110469	-0.437227	3
E9Q585	-0.136903	0.814025	0.469379	2
E9Q5D6	0.179184	0.318677	-1.63819	3
E9Q5F9	0.285596	0.19312	-0.104146	3
E9Q5K9	-0.331019	0.65613	-0.0425636	1
E9Q5W5	-0.136559	0.444929	-0.524913	1
E9Q614	-0.808397	-0.377964	0.523524	2
E9Q616	0.165596	-2.07587	-1.42294	3
E9Q6J5	0.240707	0.21907	0.893118	2
E9Q6R4	-0.470765	-0.973541	-1.00325	3
E9Q6R7	0.59886	0.0306502	-0.00297852	3
E9Q6U4	-1.03357	-1.33518	-0.101063	2
E9Q705	-1.90826	-1.54856	-1.96209	1
E9Q718	0.131808	0.314082	0.16669	1
E9Q774	3.93097	-0.526567	-0.975169	3
E9Q784	0.66565	0.679201	1.2654	2
E9Q7C1	0.399418	0.448067	0.400798	1
E9Q7E2	1.18778	0.271795	0.611335	3
E9Q7G0	0.235629	0.00300259	-0.157064	3
E9Q7L0	0.829612	0.572527	1.13407	4
E9Q7L3	0.970121	0.127107	0.193967	3
E9Q7M2	-2.87532	-1.28163	-0.633857	2
E9Q7Q3	0.13338	-0.037785	0.393527	2
E9Q852	0.605579	0.761052	0.97553	2
E9Q855	0.777739	0.441067	0.248008	3
E9Q8A3	-2.10547	-1.20143	-0.00623759	2
E9Q8K8	-1.15425	0.441132	-1.24343	1
E9Q8N5	0.317089	0.575402	0.334809	1
E9Q912	0.488224	-2.03704	-1.29142	3
E9Q9B7	0.488224	-1.68705	-0.967558	3
E9Q9C5	0.20037	-1.31621	-0.239887	4
E9Q9F9	-2.00415	-0.342329	-0.618291	2
E9QAE3	0.0593519	0.275293	0.744089	2
E9QAP7	-0.76024	0.761506	0.22519	2
E9QAQ7	0.109644	0.607145	0.490183	2
E9QAS4	0.631171	0.615805	0.724244	2
E9QAT0	-0.883641	0.548154	0.487556	2
E9QAZ2	0.544478	0.257809	0.807592	4
E9QB02	0.740504	0.824542	0.846792	2
E9QJV4	-0.0212054	0.192917	-1.51825	3
E9QK83	0.511094	0.71297	1.44639	2
E9QK89	0.373656	0.304051	0.911173	2
E9QKA4	-0.281184	0.725363	0.667806	2
E9QKE4	-0.251097	0.265233	-0.308572	1
E9QKK1	-0.428238	0.558311	1.2575	2
E9QKT1	0.39549	0.484804	-0.26643	3
E9QKX5	0.811889	0.72934	0.370487	3
E9QL12	-0.213538	-0.0690765	-0.663645	3
E9QL65	-1.77617	-1.57484	-1.46323	2
E9QLA5	-1.89952	-2.0773	-2.17382	3
E9QLK7	0.398009	0.515319	0.452802	1
E9QLS6	-1.52008	0.291726	0.581579	2
E9QLZ9	-0.44164	0.795784	0.821196	2
E9QM38	0.205853	0.379702	0.442148	2
E9QM61	-0.217069	-0.00532029	-0.346937	1
E9QM77	0.523464	0.134589	0.312912	3
E9QM90	-0.152328	0.48584	-0.461934	1
E9QMP6	0.398348	0.424274	0.229546	3
E9QNG1	0.361408	-0.518217	-1.13028	3
E9QNH7	-1.17904	0.402317	-1.14301	1
E9QNN1	0.110852	0.53321	0.838442	2
E9QNR6	-0.214474	-1.38107	-0.365239	4
E9QNT5	0.522282	-1.53616	0.414231	4
E9QNY8	0.449489	0.73065	-0.489117	3
E9QP00	0.679456	0.591404	0.792285	4
E9QP19	0.627855	0.234739	1.03936	4
E9QP46	0.552516	0.0150382	0.0200092	3
E9QP59	0.502046	-0.552538	0.156136	4
E9QP84	-1.41032	0.401496	-1.50205	1
E9QPA1	0.488224	-1.57434	-2.36783	3
E9QPB3	-2.9116	0.401678	1.2681	2
E9QPI5	0.636722	0.600461	1.08672	2
E9QPK4	0.0802845	0.39346	0.757708	2
E9QQ10	0.234896	0.27328	-0.27278	3
F2Z3U3	-1.23569	-0.270051	-0.94139	1
F6QFD1	0.488224	0.133849	0.30408	4
F6R9G0	-1.86576	-0.0550056	0.913882	2
F6RGI3	0.391421	-0.408806	0.271974	4
F6RK07	-1.28998	0.285844	0.380678	2
F6RPJ9	0.987548	0.717492	1.07295	4
F6T9K1	-0.223063	-0.341667	0.720276	2
F6TCF9	-1.86069	-0.952372	-0.454649	2
F6UIS1	-0.37748	0.402317	-0.603013	1
F6V6T4	-1.022	-1.58644	-0.482288	4
F6VQ19	-2.81847	-2.4907	-2.85465	1
F6VW30	0.503762	0.802441	-0.362302	3
F6WHL0	0.704522	0.155083	-1.1841	3
F6WJB7	0.127922	0.518378	0.408661	2
F6YVP7	0.459977	0.162053	0.332565	4
F6ZBR8	0.441587	0.0829053	-0.366931	3
F6ZDS4	0.52116	0.514053	0.717743	2
F6ZFU0	1.39214	0.810213	0.843873	3
F6ZGI7	0.0845335	-0.370732	-0.861967	3
F7A6H4	0.495951	0.298523	1.36411	2
F7AA26	0.567818	1.25172	-0.246287	1
F7ACR9	0.242256	0.402188	1.616	2
F7C846	0.298126	0.367896	0.33126	1
F7D432	0.352517	-0.542229	0.209636	4
F7DEU6	-0.955878	-0.502737	-0.404378	2
F8VPK0	0.797349	0.663386	0.426497	3
F8VPL5	0.0360953	0.517038	-0.0685572	1
F8VPM0	-0.0133512	0.0899472	2.13704	2
F8VPN4	-0.150811	0.0258644	-2.3293	3
F8VPN7	-0.43689	-0.127319	-0.036503	2
F8VPP8	-1.30316	-0.168799	-0.491199	2
F8VPQ2	0.705066	-0.983816	0.404092	4
F8VPR5	0.747623	0.587611	0.379487	3
F8VQ05	-1.70386	0.195464	-0.658837	1
F8VQ54	0.42228	0.563997	0.424012	1
F8VQD7	1.02013	0.411227	-1.54085	3
F8VQE9	0.374612	0.100093	-0.500373	3
F8VQG7	0.483117	0.109015	-0.614917	3
F8VQJ3	-0.466208	-0.0226897	-0.123843	2
F8VQL9	0.713625	0.846877	0.0627851	3
F8WGM5	1.07842	0.336008	1.78865	4
F8WGW3	0.224032	0.077372	0.500969	2
F8WH20	0.488224	0.331986	-0.399414	3
F8WHW3	0.909612	0.830258	0.95706	4
F8WHY8	-1.46664	-1.7808	-1.72734	3
F8WIE5	-0.101382	0.562758	0.280001	1
F8WIG5	-0.0221242	-0.150991	0.951653	2
F8WIJ0	1.19844	0.847371	0.0535188	3
F8WIU1	-0.642495	-0.495902	-0.541989	2
F8WIU7	-0.34693	-1.09534	0.38225	4
F8WJ93	0.372165	0.39373	0.382632	1
F8WJA0	0.346587	0.51175	1.12951	2
F8WJB0	0.420655	0.307841	0.327362	3
F8WJD4	0.591976	0.377856	0.666254	4
F8WJE0	-0.280538	-0.977916	-0.390171	4
F8WJG3	1.09031	0.457586	0.703587	3
G3UVU2	0.781151	0.41072	-1.58655	3
G3UVV4	0.352455	0.788978	-0.174203	1
G3UW58	0.488224	0.19156	-0.107708	3
G3UW89	-2.33049	-1.18385	-1.2124	2
G3UWD3	0.21373	1.32507	0.948031	2
G3UWG1	0.25678	-1.07453	-1.49961	3
G3UWH9	0.220352	-0.0338463	-0.126565	3
G3UWX1	0.317584	0.406907	1.02048	2
G3UXL2	0.322249	0.14198	0.801674	2
G3UXT7	0.549495	0.516276	0.646998	2
G3UYJ7	1.00703	-0.0381428	-1.01325	3
G3UYV7	0.37707	0.292888	0.709341	2
G3UZM1	0.273955	0.689013	0.257043	1
G3X8Q1	-0.0275141	0.578068	0.640821	2
G3X8R5	-2.11318	0.35959	0.706126	2
G3X8T3	0.488255	0.231059	-0.868234	3
G3X8U8	0.77046	0.826801	0.761864	1
G3X8X0	0.0562131	0.57129	0.522256	2
G3X8X7	0.304281	0.55507	0.0366353	1
G3X8Y3	0.314166	0.259213	0.590355	2
G3X908	-1.71636	0.405031	0.466231	2
G3X920	-0.227616	0.662613	0.0426352	1
G3X922	0.242214	0.641802	0.452704	1
G3X926	0.539479	0.282258	0.937955	2
G3X934	1.11238	0.764192	0.7675	3
G3X940	0.351893	-0.340013	-0.819501	3
G3X957	1.29376	0.95736	0.979275	3
G3X972	-0.178705	0.402317	-0.255029	1
G3X9B1	0.563503	0.514755	1.41104	2
G3X9H5	0.579538	0.383329	0.430195	3
G3X9I1	0.6353	0.856548	0.783778	2
G3X9K3	-0.313073	0.165365	-0.834998	1
G3X9L6	0.462912	0.267205	-0.0187878	3
G3X9M0	0.487307	-0.710897	-0.144151	3
G3X9N6	-0.0628575	-0.928613	-0.466299	4
G3X9Y5	-0.173009	-0.544658	-0.879025	3
G3X9Z0	-0.0748082	-1.42058	0.0944296	4
G3X9Z4	-1.25628	0.172389	0.935295	2
G5E829	0.769935	0.111396	-0.373285	3
G5E850	0.584937	-0.092578	-1.17057	3
G5E866	0.631533	0.366541	0.539933	4
G5E881	0.551227	0.140352	0.747879	4
G5E895	-0.552332	0.511548	-2.36632	3
G5E896	0.673015	0.629171	0.426926	3
G5E897	0.488224	-0.136942	-0.275836	3
G5E8A0	-1.74913	-1.75055	-0.1141	2
G5E8A7	-0.92808	-0.0207042	0.00117317	2
G5E8C4	-0.0900996	0.340399	-1.4501	3
G5E8I8	0.899113	0.748879	0.750664	3
G5E8J3	0.639001	-0.96658	0.119801	4
G5E8N3	0.494137	0.8404	0.12728	1
G5E8N7	0.31981	0.391693	-0.332351	3
G5E8R4	0.336816	0.544367	0.399468	1
G5E8R8	0.709023	0.590301	0.908863	2
G5E8T9	-1.43421	-0.239941	-0.604756	2
G5E902	0.731932	0.432113	0.329691	3
G8JL51	-0.525634	0.204943	0.578972	2
G8JL74	-0.151683	0.107526	-0.505423	1
H3BIW0	1.14824	0.514873	0.830202	4
H3BJ07	-1.2163	-0.510228	-0.0455504	2
H3BJ30	-0.56834	0.180724	-0.0377041	2
H3BJU7	1.04804	0.629979	0.168676	3
H3BK43	-1.62437	-0.498963	-1.34384	1
H3BKM2	0.376814	-0.905796	0.669724	4
H3BKY1	0.172638	0.167065	0.480708	2
H3BL44	-0.397177	-0.829395	-0.885572	3
H3BLL2	-1.01924	-0.0447203	-0.731381	1
H7BWY4	0.64982	0.416046	0.567857	4
H7BX02	0.488224	0.319484	0.0482637	3
H7BX26	-0.121397	0.425356	-1.68985	3
H7BX95	2.08311	0.421469	0.643594	3
H9KV00	0.371672	0.269205	-0.912777	3
I1E4X2	-1.35324	-1.51608	-0.756341	2
I3ITR1	-1.25506	-1.13578	-1.45892	3
I7HLV2	0.493753	0.345045	0.82811	2
J3KMM1	-1.41525	0.288031	0.40966	2
J3QM81	0.227588	-0.0572885	-0.419784	3
J3QNK5	0.829776	0.80404	0.710313	3
J3QNY1	0.14337	0.247542	0.683356	2
J3QP99	-2.16545	0.0286928	0.586804	2
K3W4M4	0.544099	-0.051199	-1.36191	3
K3W4P2	0.713783	0.571139	0.662444	4
K3W4R5	0.7925	0.857189	0.347842	3
K3W4T3	0.655026	0.18671	0.173566	3
K4DI67	0.26835	0.642616	0.160779	1
K4DI77	0.779726	0.776772	0.146196	3
M0QWP1	1.4884	0.192776	-0.517327	3
O08528	-0.459358	0.147798	0.743356	2
O08547	0.745903	0.471462	-0.207032	3
O08579	0.885975	0.641043	0.855669	4
O08583	0.34702	0.440323	0.697748	2
O08600	-0.659318	0.599645	-0.39121	1
O08648	0.395839	0.169205	0.612319	4
O08709	1.07092	0.684913	0.59668	3
O08715	-1.40822	1.22918	-1.48177	1
O08734	0.504307	0.0518122	0.260707	3
O08738	0.488224	-0.0752874	-0.608327	3
O08795	0.781406	0.418311	-0.0338746	3
O08807	0.631306	-0.116761	-0.609792	3
O08810	0.739334	0.442998	0.685446	4
O08917	0.919148	0.384253	-0.426272	3
O09005	0.492914	0.253396	0.76093	4
O09061	0.588468	0.203445	0.308461	3
O09106	0.605246	0.623946	0.833939	2
O09111	0.410313	0.326171	-0.257833	3
O09131	-1.69176	-1.21384	-0.214858	2
O09159	0.680748	0.0891434	-0.68524	3
O09174	0.726576	1.3784	-0.264435	3
O35114	-3.06907	-1.33834	-0.918279	2
O35129	0.588658	0.47815	0.593452	4
O35130	0.71725	0.551891	-0.484098	3
O35134	0.54692	0.747975	1.26429	2
O35153	0.268905	0.774472	-0.0456369	1
O35215	0.667376	0.489825	0.0376343	3
O35216	0.0707107	-0.00682008	0.541238	2
O35218	0.463853	0.31617	0.657146	4
O35226	-0.924701	-1.48343	-0.739228	4
O35286	0.403271	0.400528	0.506331	2
O35343	-1.28352	-0.0636839	-0.852814	1
O35344	-0.354983	-1.33253	-1.05852	3
O35350	0.933451	1.3169	-0.803843	3
O35379	1.19916	0.425439	1.30972	4
O35382	0.349572	0.573759	0.570942	2
O35386	0.947678	0.480093	0.271974	3
O35435	-0.377253	0.652324	0.774576	2
O35465	-0.791692	-0.108708	-1.18374	1
O35566	-0.0520881	-1.52897	-0.832578	3
O35593	0.61237	0.430763	0.392585	3
O35648	0.396924	-2.17508	-0.195229	4
O35654	0.179283	0.693528	1.46216	2
O35680	-1.1295	0.658096	0.203222	2
O35683	0.428647	0.31286	-0.261448	3
O35685	0.568932	0.433558	1.04764	2
O35704	0.693956	0.380779	0.214973	3
O35841	0.440545	0.421209	0.743335	2
O35855	-0.187909	0.70266	1.49322	2
O35857	0.562213	-1.04657	-0.433552	3
O35864	0.144011	0.217094	-0.924619	3
O35887	0.545448	0.431489	-0.459633	3
O35943	-0.671445	0.28273	-0.0616972	2
O35972	0.352037	0.382936	0.242668	3
O54692	-1.1305	0.398512	-1.68627	1
O54734	0.720212	0.417201	-0.0875605	3
O54774	0.526699	0.685577	0.0703007	3
O54781	0.45246	0.496845	-0.0875152	3
O54825	0.620301	0.659486	1.29763	2
O54833	1.05545	0.035443	0.321842	3
O54916	-0.374949	0.517859	0.615102	2
O54918	0.868148	0.341679	0.103565	3
O54941	0.606035	-0.677146	0.318242	4
O54950	-1.95503	-0.976232	-1.2707	2
O54983	1.20605	0.358512	0.171831	3
O54984	0.469733	0.803792	0.986242	2
O54988	0.595037	0.384462	0.506538	4
O55013	0.629947	-1.05128	0.222425	4
O55022	0.976809	0.788243	-0.523066	3
O55028	-0.499775	-0.556981	-0.446034	4
O55029	0.329926	0.296139	-0.288595	3
O55060	-1.93843	-1.22713	-0.646594	2
O55106	0.339956	0.0174837	-0.52416	3
O55125	0.687869	0.444656	-0.288843	3
O55135	0.498407	0.412547	0.559526	4
O55142	0.61032	0.229795	0.838788	4
O55143	0.670896	0.802628	-1.07675	3
O55201	0.679041	0.795348	0.923672	2
O55234	0.56464	0.324734	-0.00937001	3
O55242	0.446514	0.168069	-0.0197818	3
O70126	0.742505	0.738473	0.271974	3
O70152	1.0847	0.594704	-0.0719904	3
O70194	0.623713	0.43954	0.652284	4
O70201	-0.561528	0.26475	1.49319	2
O70252	1.05406	0.312531	-0.627223	3
O70310	0.509023	0.454091	0.688649	2
O70318	0.579001	0.710682	0.440706	1
O70378	0.201836	0.84692	1.17152	2
O70435	0.551364	0.243327	0.417101	4
O70445	0.485601	-0.695679	0.271974	4
O70472	-0.250731	0.753263	-0.134598	1
O70481	0.181075	0.00530588	0.163445	4
O70503	0.69246	-1.43138	-0.0952992	4
O70546	0.713207	-0.050898	1.1006	4
O70551	0.877233	0.591073	0.846621	4
O70572	0.441044	0.293684	-1.26139	3
O70591	0.34667	0.338284	0.322286	3
O88196	-1.63873	-1.6657	-1.43631	2
O88271	-3.76909	-2.14556	-1.73308	2
O88342	-0.587267	0.161791	-0.560116	1
O88396	1.20731	0.232102	0.120154	3
O88425	0.9598	0.55439	0.303262	3
O88455	1.01803	-1.28614	-1.39617	3
O88466	0.527665	0.63585	1.54052	2
O88477	0.278126	-0.180539	0.38464	4
O88508	0.615582	0.229532	-2.05741	3
O88520	0.70999	0.0364874	0.661321	4
O88531	0.226538	-1.59653	-1.31663	3
O88532	0.666082	0.722313	0.707004	2
O88543	-0.487815	0.238444	0.055582	2
O88544	0.352136	-1.49697	0.0408064	4
O88569	0.0161253	0.179023	0.338948	2
O88574	-0.366543	0.855472	1.50054	2
O88587	-0.964665	-1.79326	-0.868124	4
O88630	-1.85972	-0.584989	-0.150541	2
O88653	0.457323	0.541935	0.190671	3
O88685	0.393447	0.33258	0.259165	3
O88696	0.424295	-0.130956	0.630403	4
O88700	0.626477	0.76589	1.03599	2
O88708	-1.53434	-0.815566	0.271974	2
O88712	0.672931	-0.848626	-0.876268	3
O88736	-1.68846	-2.00679	-2.07698	3
O88796	0.620637	0.448094	1.32331	2
O88844	-0.113131	-1.46183	-0.871954	3
O88851	-0.851898	-1.26015	-0.511566	4
O88879	0.280758	0.390009	0.129024	1
O88983	-1.39829	0.460218	0.236828	2
O89079	0.315986	0.274135	-1.30113	3
O89086	-0.620452	0.00561913	-0.0661164	2
O89112	-0.18031	0.200115	-0.755709	3
P00375	0.815495	0.376563	0.420921	3
P00493	0.457261	0.491375	1.31911	2
P01027	-2.58879	-3.14142	-1.23504	2
P01887	-0.133817	-2.25547	-2.6546	3
P02463	0.627174	0.27421	-0.964355	3
P03888	0.549244	0.294748	-0.126168	3
P04184	-0.198527	-0.915383	-0.207084	4
P05063	1.05725	0.48899	0.664986	3
P05201	0.752748	0.790355	1.14319	2
P05202	0.652587	0.0764643	-0.418213	3
P05213	0.419224	0.211029	-0.184283	3
P06745	0.539251	0.463926	0.183719	3
P07356	1.17742	0.116691	-0.686865	3
P07607	-0.0442348	0.536913	0.429178	2
P07742	0.803039	0.223668	0.440432	3
P08003	0.410266	0.285294	-1.07024	3
P08030	0.685984	0.61586	0.651109	4
P08113	0.616472	0.235672	-0.433703	3
P08228	0.559727	0.284585	0.450734	4
P08249	0.305855	0.346495	-0.0483784	3
P08775	0.769332	0.590182	0.813443	4
P09103	0.908139	0.152606	-0.808509	3
P09242	1.51097	0.775501	2.70203	2
P09405	0.386464	0.0384486	1.01194	2
P09411	1.00603	0.543795	0.434519	3
P09803	0.675184	0.277255	1.79504	2
P0C7N9	0.423985	0.818702	0.519002	1
P0DMN7	-2.21847	-0.142471	0.271974	2
P10126	0.525663	0.255185	0.255726	3
P10518	0.894807	-0.0507443	-0.553602	3
P10605	0.663626	-0.0336655	-1.82544	3
P10630	1.98136	1.09824	0.58337	3
P10711	0.107954	0.494764	0.794451	2
P10922	-3.82209	-3.20545	-3.42764	2
P11031	-0.56914	-0.849127	-0.367062	4
P11157	-0.0383238	0.628345	0.913632	2
P11352	-0.607249	0.497201	0.0676082	1
P11438	-1.77932	-1.6137	-1.61318	2
P11440	0.250965	0.470564	0.6577	2
P11499	0.43145	0.28755	0.615397	4
P11688	2.02902	0.528026	0.558858	3
P11881	0.749656	0.552061	0.303844	3
P11930	1.29191	0.984513	-1.14648	3
P11983	0.550852	0.254813	0.638467	4
P12025	0.96768	-1.26187	-0.524531	3
P12382	0.533525	0.116608	0.847988	4
P12787	0.583637	0.779553	0.648027	1
P12815	0.763232	0.4027	-0.230353	3
P12970	0.443363	0.247311	0.862534	2
P13020	-1.38371	-1.82326	-0.699675	2
P13439	0.335436	0.529762	1.24229	2
P13595	-0.90944	0.402317	-3.38013	3
P13597	6.2e-05	0.808318	-0.217256	1
P14094	0.544427	-0.136817	-1.59926	3
P14115	0.570493	0.328474	0.876347	4
P14131	0.451578	0.208827	0.606137	4
P14148	0.501637	0.183351	0.818244	4
P14152	0.198011	0.0231834	-0.915142	3
P14206	0.472589	0.173508	0.72095	4
P14211	0.921369	-2.10679	-0.426963	4
P14576	-1.15947	-0.840538	-1.10832	1
P14685	0.463978	0.545553	0.295374	3
P14733	0.467686	0.357714	0.110828	3
P14901	0.660615	0.779174	1.00298	2
P15105	-0.374839	-0.519465	-1.2573	3
P15208	1.06939	-0.684708	-0.944881	3
P15920	0.666925	0.0338737	-0.438162	3
P16254	-1.79608	0.298755	-1.58273	1
P16332	-1.55775	-1.59726	-2.03528	3
P17182	0.542088	0.102755	1.02267	4
P17426	0.546292	0.614562	-0.0471442	3
P17427	0.736906	0.357531	0.0998445	3
P17439	-0.595399	-0.89227	-1.63219	3
P17742	0.529879	0.54139	0.567795	2
P17751	0.915014	0.344035	-1.08831	3
P17918	0.865573	0.550185	-1.21591	3
P18242	-0.571788	-0.857563	-0.739598	3
P18654	0.349717	-1.03885	-0.85153	3
P19096	0.384498	0.0998144	-0.109739	3
P19137	0.601752	-0.581281	2.432	2
P19157	0.529791	0.836763	0.461398	1
P19253	0.472571	0.279028	0.902729	2
P19783	0.577044	0.747715	0.558078	1
P20029	0.721345	0.171963	-0.636654	3
P20108	0.530831	-0.0859245	-0.984305	3
P20263	-2.12021	-1.52212	0.271974	2
P20664	-0.400991	-0.504936	0.91639	2
P21126	0.888612	-0.888045	0.527311	4
P21278	0.144362	0.449097	-0.168979	1
P21956	-0.502114	-0.0338796	0.592956	2
P22682	-0.565386	0.484793	0.409309	2
P22907	-1.25681	-1.10808	-1.11028	2
P23116	0.540289	0.391311	0.598043	4
P23475	-0.905593	-0.547331	0.721624	2
P23780	-1.29499	-0.413243	-0.032634	2
P24369	0.461064	0.28555	-0.429818	3
P24527	0.282542	0.405889	-0.233316	3
P24547	0.442076	0.517678	1.19132	2
P24668	0.65772	0.132209	0.434356	4
P24860	0.135189	0.525331	1.9292	2
P25206	-0.0330449	0.284081	1.17812	2
P25444	0.431625	0.22988	0.602283	4
P25799	-1.00083	0.174656	-0.246012	2
P26039	0.406488	0.595694	-0.165245	3
P26040	0.0594071	-0.0318473	0.23409	2
P26041	0.474062	0.0837526	-0.345886	3
P26043	-1.42598	-1.81113	0.105202	2
P26187	-1.22098	0.0772626	1.97109	2
P26231	0.49294	0.260988	0.758967	4
P26369	0.638338	0.279585	-0.310204	3
P26516	0.493004	0.456955	0.427807	3
P26645	-1.58521	-3.25737	-2.43338	4
P26883	0.46215	0.28245	0.065453	3
P27046	0.837237	-0.0313457	-1.22565	3
P27048	1.05364	0.117831	0.866248	4
P27612	0.755814	0.772642	0.752282	1
P27659	0.662611	0.336949	0.770708	4
P27773	0.461652	0.101399	-0.629107	3
P28028	-0.7784	-0.391346	-0.762916	1
P28271	0.709397	0.265597	-0.452314	3
P28352	0.569523	0.710749	0.494505	1
P28474	-2.04184	-2.06763	-1.2778	2
P28659	0.385241	0.412115	-0.902922	3
P29341	0.583251	0.547906	0.866762	2
P29351	-0.453461	0.0889247	0.0810462	2
P29595	-1.52514	-1.90355	-0.662918	2
P30275	0.755982	0.506538	-0.810777	3
P30285	0.162121	0.193533	-0.068018	3
P30412	-1.82943	-0.797374	-1.95324	1
P30416	0.755533	0.545175	1.35505	2
P30999	0.260213	0.0431104	0.146979	4
P32067	0.553063	0.428363	0.606291	4
P32233	-0.0157348	0.353894	0.407482	2
P32883	0.95669	-0.459481	0.309368	4
P32921	-0.905599	0.435324	0.529386	2
P33174	0.299721	0.430094	0.746932	2
P33609	0.426285	0.711149	1.26497	2
P33610	-1.67746	0.437845	1.35833	2
P33611	0.089421	0.512113	0.64756	2
P34022	-1.67229	-1.43009	-0.989472	2
P34884	0.658495	0.358467	1.04213	4
P34914	0.823302	0.469941	2.18711	2
P35123	0.265707	0.558626	0.0729516	1
P35235	0.761334	-0.0330951	-0.459015	3
P35278	0.286957	0.15301	0.173279	3
P35279	0.57341	0.0980564	-0.294537	3
P35282	0.361521	0.284088	-0.280459	3
P35293	0.459477	-0.0461119	-0.0959702	3
P35486	0.420694	0.647973	0.218699	1
P35550	0.852594	0.536155	-0.818583	3
P35564	0.773054	0.363058	0.0695515	3
P35585	-0.750574	0.774948	-0.589151	1
P35700	0.728295	0.684708	0.777819	4
P35762	-0.412187	-0.356049	-0.77372	3
P35821	-0.424256	-1.9291	-2.16822	3
P35822	0.691651	0.658615	-0.186472	3
P35831	1.31098	0.15611	-0.434804	3
P35979	0.512888	0.255383	0.288999	3
P35980	0.513109	0.271701	0.365635	3
P36552	0.543641	0.19427	0.0558163	3
P36916	0.540608	0.509821	0.450171	3
P37040	0.263181	-0.698566	-1.01431	3
P37913	1.05524	0.527336	1.4486	4
P38060	0.618304	0.435176	-1.3726	3
P38647	0.505296	0.788728	0.460761	1
P40124	0.409527	0.117273	-0.10181	3
P40142	0.897821	0.458763	0.912799	4
P40201	0.693152	-0.433713	0.271974	4
P40336	0.440157	0.625636	0.324474	1
P41105	0.650088	0.380587	0.333787	3
P41230	-0.58487	0.121792	0.350057	2
P42125	0.175301	-0.0233602	-1.05588	3
P42128	0.706568	0.00051373	-0.410163	3
P42208	-0.192695	-0.114646	-0.520434	3
P42227	-0.0531519	0.223012	-1.19336	3
P42669	-0.965035	0.788243	-0.653322	1
P42932	0.530435	0.305829	0.710246	4
P43346	-0.287365	-1.21525	-0.106119	4
P43883	0.488224	-2.17988	-1.23962	3
P45376	0.010132	0.525569	0.434493	2
P46061	0.0661973	0.455486	0.552466	2
P46460	0.418924	0.528965	0.263902	1
P46467	-2.67872	-2.14032	-1.89864	2
P46471	0.389786	0.336165	0.234661	3
P46638	0.530633	-0.058152	-0.335993	3
P46664	0.27453	0.0634603	0.561472	2
P46737	-0.690133	0.129401	-0.997386	1
P46935	0.262745	0.836784	0.716998	2
P46978	0.714231	0.52013	0.0258086	3
P47199	-1.65507	-1.47741	-1.22906	2
P47753	-1.23516	-0.0473125	-0.106449	2
P47754	0.455181	0.174958	-0.000334814	3
P47757	0.237626	0.111277	-0.10231	3
P47791	0.105248	0.683785	0.629455	2
P47809	-1.36004	-1.38826	-1.37503	3
P47810	-0.380457	-0.590639	1.59062	2
P47811	0.293492	0.856224	0.143799	1
P47856	0.248019	-0.529914	-0.316756	3
P47911	0.55798	0.248289	0.749633	4
P47941	-1.86308	0.319268	0.0351506	2
P47962	0.621513	0.252507	0.724026	4
P47963	0.59934	0.198592	0.767223	4
P47968	0.540296	0.727645	0.885048	2
P48024	0.0635135	0.390601	0.250877	1
P48036	0.81416	0.175604	-1.37228	3
P48377	0.597939	-1.74477	-0.536746	4
P48428	0.415338	0.147289	0.238784	3
P48678	0.15988	-0.448197	-0.734731	3
P48758	0.811715	0.0822497	0.214896	3
[truncated: 2,315 more rows]
