# Supplementary material for: Epigenetic mechanisms of Strip2 in differentiation of pluripotent stem cells
Source: Cell Death Discov. 2022 Nov 5;8:447. doi: 10.1038/s41420-022-01237-5 (PMC9637104; doi:10.1038/s41420-022-01237-5)
Supplement: Supplementary file 16 — Table S7 [file 41420_2022_1237_MOESM16_ESM.xlsx]

## Sheet: Cluster 01
GroupID	Category	Term	Description	LogP	Log(q-value)	InTerm_InList	Genes	Symbols
1_Summary	GO Biological Processes	GO:0006281	DNA repair	-26.6163	-22.2405	64/490	11920,12572,13006,13194,13211,13990,14211,14897,17215,17216,17217,17219,17220,17314,17350,17420,17685,17686,17688,18854,18968,18972,18973,19090,19360,19891,20174,20892,21849,21853,22224,22256,28000,51869,57320,66165,67439,67711,68058,68275,69716,69920,70620,70790,71514,71702,77011,93759,99982,100683,107951,109145,110033,117599,208836,212377,226026,227099,235323,245000,252870,269254,319801,327762,…	Atm,Cdk7,Smc3,Ddb1,Dhx9,Smarcad1,Smc2,Trip12,Mcm3,Mcm2,Mcm4,Mcm6,Mcm7,Mgmt,Mlh1,Mnat1,Msh2,Msh3,Msh6,Pml,Pola1,Pold2,Pole,Prkdc,Rad50,Rpa2,Ruvbl2,Cenpx,Trim28,Timeless,Usp10,Ung,Prpf19,Rif1,Park7,Bccip,Xab2,Nsmce1,Chd1l,Rpa1,Trip13,Polr2i,Ube2v2,Ubr5,Sfpq,Cdc5l,Ticrr,Sirt1,Kdm1a,Trrap,Cdk9,Gins4,Kif22,Helb,Fanci,Mms22l,Smc5,Pms1,Usp28,Atr,Usp7,Setx,Tigar,Dna2,Bax,Cbx1,Cdk1,Fxr1,Hmox1,Dnaja1,Plk1,…
1_Member	GO Biological Processes	GO:0006281	DNA repair	-26.6163	-22.2405	64/490	11920,12572,13006,13194,13211,13990,14211,14897,17215,17216,17217,17219,17220,17314,17350,17420,17685,17686,17688,18854,18968,18972,18973,19090,19360,19891,20174,20892,21849,21853,22224,22256,28000,51869,57320,66165,67439,67711,68058,68275,69716,69920,70620,70790,71514,71702,77011,93759,99982,100683,107951,109145,110033,117599,208836,212377,226026,227099,235323,245000,252870,269254,319801,327762	Atm,Cdk7,Smc3,Ddb1,Dhx9,Smarcad1,Smc2,Trip12,Mcm3,Mcm2,Mcm4,Mcm6,Mcm7,Mgmt,Mlh1,Mnat1,Msh2,Msh3,Msh6,Pml,Pola1,Pold2,Pole,Prkdc,Rad50,Rpa2,Ruvbl2,Cenpx,Trim28,Timeless,Usp10,Ung,Prpf19,Rif1,Park7,Bccip,Xab2,Nsmce1,Chd1l,Rpa1,Trip13,Polr2i,Ube2v2,Ubr5,Sfpq,Cdc5l,Ticrr,Sirt1,Kdm1a,Trrap,Cdk9,Gins4,Kif22,Helb,Fanci,Mms22l,Smc5,Pms1,Usp28,Atr,Usp7,Setx,Tigar,Dna2
1_Member	GO Biological Processes	GO:0006974	cellular response to DNA damage stimulus	-26.209	-22.2274	79/759	11920,12028,12412,12534,12572,13006,13194,13211,13990,14211,14359,14897,15368,15502,17215,17216,17217,17219,17220,17314,17350,17420,17685,17686,17688,18817,18854,18968,18972,18973,19090,19360,19891,20174,20892,21849,21853,22224,22256,24086,28000,51869,53380,53817,57320,66165,66824,67439,67711,68058,68275,69716,69920,70620,70790,71514,71702,77011,77065,93759,99982,100683,107951,109145,110033,11759…	Atm,Bax,Cbx1,Cdk1,Cdk7,Smc3,Ddb1,Dhx9,Smarcad1,Smc2,Fxr1,Trip12,Hmox1,Dnaja1,Mcm3,Mcm2,Mcm4,Mcm6,Mcm7,Mgmt,Mlh1,Mnat1,Msh2,Msh3,Msh6,Plk1,Pml,Pola1,Pold2,Pole,Prkdc,Rad50,Rpa2,Ruvbl2,Cenpx,Trim28,Timeless,Usp10,Ung,Tlk2,Prpf19,Rif1,Psmd10,Ddx39b,Park7,Bccip,Pycard,Xab2,Nsmce1,Chd1l,Rpa1,Trip13,Polr2i,Ube2v2,Ubr5,Sfpq,Cdc5l,Ticrr,Ints7,Sirt1,Kdm1a,Trrap,Cdk9,Gins4,Kif22,Helb,Fanci,Mms22l,Smc5,Pms1…
1_Member	GO Biological Processes	GO:0006302	double-strand break repair	-13.7054	-10.9206	32/240	11920,13990,14897,17215,17216,17217,17219,17220,17314,17350,17685,18854,18968,19090,19360,19891,21853,28000,51869,67711,68275,69716,70620,70790,71514,99982,109145,117599,212377,226026,269254,327762	Atm,Smarcad1,Trip12,Mcm3,Mcm2,Mcm4,Mcm6,Mcm7,Mgmt,Mlh1,Msh2,Pml,Pola1,Prkdc,Rad50,Rpa2,Timeless,Prpf19,Rif1,Nsmce1,Rpa1,Trip13,Ube2v2,Ubr5,Sfpq,Kdm1a,Gins4,Helb,Mms22l,Smc5,Setx,Dna2
1_Member	GO Biological Processes	GO:0006310	DNA recombination	-10.6462	-8.1895	31/292	11920,13990,17215,17216,17217,17219,17220,17350,17685,17686,17688,19090,19360,19891,20174,20892,20926,21853,22256,51869,67711,68275,69716,71514,99982,109145,117599,212377,226026,269254,321006	Atm,Smarcad1,Mcm3,Mcm2,Mcm4,Mcm6,Mcm7,Mlh1,Msh2,Msh3,Msh6,Prkdc,Rad50,Rpa2,Ruvbl2,Cenpx,Supt6,Timeless,Ung,Rif1,Nsmce1,Rpa1,Trip13,Sfpq,Kdm1a,Gins4,Helb,Mms22l,Smc5,Setx,Dcaf1
1_Member	GO Biological Processes	GO:0000724	double-strand break repair via homologous recombination	-7.3853	-5.25253	17/131	11920,17215,17216,17217,17219,17220,19891,21853,51869,67711,68275,71514,99982,109145,117599,212377,226026	Atm,Mcm3,Mcm2,Mcm4,Mcm6,Mcm7,Rpa2,Timeless,Rif1,Nsmce1,Rpa1,Sfpq,Kdm1a,Gins4,Helb,Mms22l,Smc5
1_Member	GO Biological Processes	GO:0000725	recombinational repair	-7.33564	-5.21025	17/132	11920,17215,17216,17217,17219,17220,19891,21853,51869,67711,68275,71514,99982,109145,117599,212377,226026	Atm,Mcm3,Mcm2,Mcm4,Mcm6,Mcm7,Rpa2,Timeless,Rif1,Nsmce1,Rpa1,Sfpq,Kdm1a,Gins4,Helb,Mms22l,Smc5
1_Member	GO Biological Processes	GO:0000018	regulation of DNA recombination	-4.6893	-2.93258	12/108	13990,17350,17685,17686,17688,19360,19891,20926,21853,51869,99982,117599	Smarcad1,Mlh1,Msh2,Msh3,Msh6,Rad50,Rpa2,Supt6,Timeless,Rif1,Kdm1a,Helb
1_Member	GO Biological Processes	GO:0010569	regulation of double-strand break repair via homologous recombination	-2.21011	-0.873314	5/46	19891,21853,51869,99982,117599	Rpa2,Timeless,Rif1,Kdm1a,Helb
2_Summary	Reactome Gene Sets	R-MMU-8953854	Metabolism of RNA	-26.126	-22.2274	67/549	11834,11837,12181,12572,13211,13681,15381,15481,15507,17420,17749,18141,18521,18789,19184,19386,20068,20924,21681,27370,28000,50912,51810,53380,53817,53975,56095,58184,64340,66070,66249,66420,66475,66491,66603,66997,67439,67619,68183,68278,68598,69072,69920,71702,72047,72198,72662,74035,74320,78294,80886,98758,102462,102614,103573,109075,192170,208643,213773,218210,225348,225363,231329,234594,238…	Aqr,Rplp0,Bop1,Cdk7,Dhx9,Eif4a1,Hnrnpc,Hspa8,Hspb1,Mnat1,Polr2k,Nup50,Pcbp2,Papola,Psmc5,Ranbp2,Rps17,Supt5,Alyref,Rps26,Prpf19,Exosc10,Hnrnpu,Psmd10,Ddx39b,Ddx20,Ftsj3,Cnot9,Dhx38,Cwc15,Pno1,Polr2e,Rps23,Polr2l,Gemin2,Psmd12,Xab2,Nob1,Bcas2,Ddx39a,Dnajc8,Ebna1bp2,Polr2i,Cdc5l,Ddx42,Mtrex,Dis3,Nol9,Wdr33,Rps27a,Senp3,Hnrnpf,Imp3,Rpp25,Xpo1,Exosc4,Eif4a3,Eif4g1,Tbl3,Nup153,Wdr36,Etf1,Polr2b,Cnot1,…
2_Member	Reactome Gene Sets	R-MMU-8953854	Metabolism of RNA	-26.126	-22.2274	67/549	11834,11837,12181,12572,13211,13681,15381,15481,15507,17420,17749,18141,18521,18789,19184,19386,20068,20924,21681,27370,28000,50912,51810,53380,53817,53975,56095,58184,64340,66070,66249,66420,66475,66491,66603,66997,67439,67619,68183,68278,68598,69072,69920,71702,72047,72198,72662,74035,74320,78294,80886,98758,102462,102614,103573,109075,192170,208643,213773,218210,225348,225363,231329,234594,238…	Aqr,Rplp0,Bop1,Cdk7,Dhx9,Eif4a1,Hnrnpc,Hspa8,Hspb1,Mnat1,Polr2k,Nup50,Pcbp2,Papola,Psmc5,Ranbp2,Rps17,Supt5,Alyref,Rps26,Prpf19,Exosc10,Hnrnpu,Psmd10,Ddx39b,Ddx20,Ftsj3,Cnot9,Dhx38,Cwc15,Pno1,Polr2e,Rps23,Polr2l,Gemin2,Psmd12,Xab2,Nob1,Bcas2,Ddx39a,Dnajc8,Ebna1bp2,Polr2i,Cdc5l,Ddx42,Mtrex,Dis3,Nol9,Wdr33,Rps27a,Senp3,Hnrnpf,Imp3,Rpp25,Xpo1,Exosc4,Eif4a3,Eif4g1,Tbl3,Nup153,Wdr36,Etf1,Polr2b,Cnot1,…
2_Member	GO Biological Processes	GO:0016071	mRNA metabolic process	-18.8738	-15.5394	63/660	11834,11920,13211,14300,14359,15381,15481,17350,18789,19652,20683,20924,20926,21681,22687,28000,28114,50912,51810,53817,53975,58184,64340,66070,66136,66177,66603,67010,67302,67439,68183,68278,68991,69920,70650,71514,71701,71702,71766,72162,72198,72462,73473,74111,74320,78697,80913,98758,107951,109075,192119,192170,217207,225363,225432,227331,229663,234594,238831,268697,269254,326622,636931	Aqr,Atm,Dhx9,Frg1,Fxr1,Hnrnpc,Hspa8,Mlh1,Papola,Rbm3,Sp1,Supt5,Supt6,Alyref,Zpr1,Prpf19,Nsun2,Exosc10,Hnrnpu,Ddx39b,Ddx20,Cnot9,Dhx38,Cwc15,Polr1h,Ubl5,Gemin2,Rbm7,Zc3h13,Xab2,Bcas2,Ddx39a,Ssu72,Polr2i,Zcchc8,Sfpq,Pnpt1,Cdc5l,Raver1,Dhx36,Mtrex,Rrp1b,Iws1,Rbm19,Wdr33,Pus7,Pum2,Hnrnpf,Cdk9,Exosc4,Dicer1,Eif4a3,Dhx8,Etf1,Rbm27,Gigyf2,Csde1,Cnot1,Ppwd1,Ccnb1,Setx,Upf2,Trim71
2_Member	GO Biological Processes	GO:0006397	mRNA processing	-13.6841	-10.9104	45/467	11834,13211,14300,14359,15381,15481,18789,19652,20924,20926,21681,22687,28000,51810,53817,53975,64340,66070,66177,66603,67010,67302,67439,68183,68278,68991,70650,71514,71701,71702,71766,72162,72198,72462,73473,74111,74320,98758,107951,192170,217207,225432,238831,268697,269254	Aqr,Dhx9,Frg1,Fxr1,Hnrnpc,Hspa8,Papola,Rbm3,Supt5,Supt6,Alyref,Zpr1,Prpf19,Hnrnpu,Ddx39b,Ddx20,Dhx38,Cwc15,Ubl5,Gemin2,Rbm7,Zc3h13,Xab2,Bcas2,Ddx39a,Ssu72,Zcchc8,Sfpq,Pnpt1,Cdc5l,Raver1,Dhx36,Mtrex,Rrp1b,Iws1,Rbm19,Wdr33,Hnrnpf,Cdk9,Eif4a3,Dhx8,Rbm27,Ppwd1,Ccnb1,Setx
2_Member	Reactome Gene Sets	R-MMU-72203	Processing of Capped Intron-Containing Pre-mRNA	-13.4767	-10.7443	31/229	11834,13211,15381,15481,17749,18141,18521,18789,19386,21681,28000,51810,53817,64340,66070,66420,66491,67439,68183,68278,68598,69920,71702,72047,72198,74320,98758,192170,218210,231329,238831	Aqr,Dhx9,Hnrnpc,Hspa8,Polr2k,Nup50,Pcbp2,Papola,Ranbp2,Alyref,Prpf19,Hnrnpu,Ddx39b,Dhx38,Cwc15,Polr2e,Polr2l,Xab2,Bcas2,Ddx39a,Dnajc8,Polr2i,Cdc5l,Ddx42,Mtrex,Wdr33,Hnrnpf,Eif4a3,Nup153,Polr2b,Ppwd1
2_Member	Reactome Gene Sets	R-MMU-72163	mRNA Splicing - Major Pathway	-12.529	-9.89354	26/172	11834,13211,15381,15481,17749,18521,18789,21681,28000,51810,64340,66070,66420,66491,67439,68183,68598,69920,71702,72047,72198,74320,98758,192170,231329,238831	Aqr,Dhx9,Hnrnpc,Hspa8,Polr2k,Pcbp2,Papola,Alyref,Prpf19,Hnrnpu,Dhx38,Cwc15,Polr2e,Polr2l,Xab2,Bcas2,Dnajc8,Polr2i,Cdc5l,Ddx42,Mtrex,Wdr33,Hnrnpf,Eif4a3,Polr2b,Ppwd1
2_Member	Reactome Gene Sets	R-MMU-72172	mRNA Splicing	-12.1729	-9.5453	26/178	11834,13211,15381,15481,17749,18521,18789,21681,28000,51810,64340,66070,66420,66491,67439,68183,68598,69920,71702,72047,72198,74320,98758,192170,231329,238831	Aqr,Dhx9,Hnrnpc,Hspa8,Polr2k,Pcbp2,Papola,Alyref,Prpf19,Hnrnpu,Dhx38,Cwc15,Polr2e,Polr2l,Xab2,Bcas2,Dnajc8,Polr2i,Cdc5l,Ddx42,Mtrex,Wdr33,Hnrnpf,Eif4a3,Polr2b,Ppwd1
2_Member	GO Biological Processes	GO:0008380	RNA splicing	-10.9982	-8.5145	37/394	11834,13211,14300,14359,15381,15481,19652,20926,21681,22687,27370,28000,51810,53817,53975,64340,66070,66177,66603,67010,67302,67439,68183,68278,70650,71514,71702,71766,72198,72462,73473,74111,98758,192170,217207,238831,269254	Aqr,Dhx9,Frg1,Fxr1,Hnrnpc,Hspa8,Rbm3,Supt6,Alyref,Zpr1,Rps26,Prpf19,Hnrnpu,Ddx39b,Ddx20,Dhx38,Cwc15,Ubl5,Gemin2,Rbm7,Zc3h13,Xab2,Bcas2,Ddx39a,Zcchc8,Sfpq,Cdc5l,Raver1,Mtrex,Rrp1b,Iws1,Rbm19,Hnrnpf,Eif4a3,Dhx8,Ppwd1,Setx
2_Member	WikiPathways	WP310	mRNA processing	-9.83043	-7.41366	38/453	13211,14359,15381,16865,18521,18789,19652,20924,21681,27225,51810,52513,53817,53975,57320,64340,66475,67010,67444,68278,68598,70930,71514,71766,72662,74111,80913,98758,102462,107951,109075,192119,192170,217207,229663,243272,321006,353258	Dhx9,Fxr1,Hnrnpc,Eif2d,Pcbp2,Papola,Rbm3,Supt5,Alyref,Ddx24,Hnrnpu,Ddx56,Ddx39b,Ddx20,Park7,Dhx38,Rps23,Rbm7,Ilkap,Ddx39a,Dnajc8,Nol8,Sfpq,Raver1,Dis3,Rbm19,Pum2,Hnrnpf,Imp3,Cdk9,Exosc4,Dicer1,Eif4a3,Dhx8,Csde1,Sbno1,Dcaf1,Ltv1
2_Member	GO Biological Processes	GO:0000375	RNA splicing, via transesterification reactions	-7.24402	-5.13538	25/278	11834,13211,14359,15381,15481,19652,28000,51810,53817,53975,64340,66070,66177,66603,67010,67439,68183,68278,71514,71702,71766,74111,192170,217207,269254	Aqr,Dhx9,Fxr1,Hnrnpc,Hspa8,Rbm3,Prpf19,Hnrnpu,Ddx39b,Ddx20,Dhx38,Cwc15,Ubl5,Gemin2,Rbm7,Xab2,Bcas2,Ddx39a,Sfpq,Cdc5l,Raver1,Rbm19,Eif4a3,Dhx8,Setx
2_Member	GO Biological Processes	GO:0000377	RNA splicing, via transesterification reactions with bulged adenosine as nucleophile	-7.24402	-5.13538	25/278	11834,13211,14359,15381,15481,19652,28000,51810,53817,53975,64340,66070,66177,66603,67010,67439,68183,68278,71514,71702,71766,74111,192170,217207,269254	Aqr,Dhx9,Fxr1,Hnrnpc,Hspa8,Rbm3,Prpf19,Hnrnpu,Ddx39b,Ddx20,Dhx38,Cwc15,Ubl5,Gemin2,Rbm7,Xab2,Bcas2,Ddx39a,Sfpq,Cdc5l,Raver1,Rbm19,Eif4a3,Dhx8,Setx
2_Member	GO Biological Processes	GO:0000398	mRNA splicing, via spliceosome	-7.24402	-5.13538	25/278	11834,13211,14359,15381,15481,19652,28000,51810,53817,53975,64340,66070,66177,66603,67010,67439,68183,68278,71514,71702,71766,74111,192170,217207,269254	Aqr,Dhx9,Fxr1,Hnrnpc,Hspa8,Rbm3,Prpf19,Hnrnpu,Ddx39b,Ddx20,Dhx38,Cwc15,Ubl5,Gemin2,Rbm7,Xab2,Bcas2,Ddx39a,Sfpq,Cdc5l,Raver1,Rbm19,Eif4a3,Dhx8,Setx
2_Member	KEGG Pathway	ko03040	Spliceosome	-5.79543	-3.90107	15/133	11834,15381,15481,21681,28000,51810,53817,64340,66070,67439,68183,71702,72047,192170,217207	Aqr,Hnrnpc,Hspa8,Alyref,Prpf19,Hnrnpu,Ddx39b,Dhx38,Cwc15,Xab2,Bcas2,Cdc5l,Ddx42,Eif4a3,Dhx8
2_Member	KEGG Pathway	mmu03040	Spliceosome	-5.79543	-3.90107	15/133	11834,15381,15481,21681,28000,51810,53817,64340,66070,67439,68183,71702,72047,192170,217207	Aqr,Hnrnpc,Hspa8,Alyref,Prpf19,Hnrnpu,Ddx39b,Dhx38,Cwc15,Xab2,Bcas2,Cdc5l,Ddx42,Eif4a3,Dhx8
3_Summary	Reactome Gene Sets	R-MMU-69278	Cell Cycle, Mitotic	-25.1271	-21.3533	63/504	12236,12237,12534,12572,13006,14211,15519,17215,17216,17217,17219,17220,17420,18141,18392,18536,18541,18817,18968,18972,18973,19184,19348,19386,19387,22144,26429,29870,53380,54124,54392,56150,66371,66442,66997,67037,67121,67629,68275,68549,68612,68953,69270,70799,71819,72119,73804,77605,77891,78294,103573,108000,108911,109145,208628,214444,215387,216080,218210,218914,229841,268697,327762,11920,12…	Bub1b,Bub3,Cdk1,Cdk7,Smc3,Smc2,Hsp90aa1,Mcm3,Mcm2,Mcm4,Mcm6,Mcm7,Mnat1,Nup50,Orc1,Pcm1,Pcnt,Plk1,Pola1,Pold2,Pole,Psmc5,Kif20a,Ranbp2,Rangap1,Tuba3a,Orc5,Gtse1,Psmd10,Cks1b,Ncapg,Mad2l1,Chmp4c,Spc25,Psmd12,Pmf1,Mastl,Spc24,Rpa1,Sgo2a,Ube2c,Chmp2a,Gins1,Cep192,Kif23,Tpx2,Kif2c,H2az2,Ube2s,Rps27a,Xpo1,Cenpf,Rcc2,Gins4,Kntc1,Cdk5rap2,Ncaph,Ube2d1,Nup153,Wapl,Cenpe,Ccnb1,Dna2,Atm,Cit,Ddb1,Ect2,Kif11,…
3_Member	Reactome Gene Sets	R-MMU-69278	Cell Cycle, Mitotic	-25.1271	-21.3533	63/504	12236,12237,12534,12572,13006,14211,15519,17215,17216,17217,17219,17220,17420,18141,18392,18536,18541,18817,18968,18972,18973,19184,19348,19386,19387,22144,26429,29870,53380,54124,54392,56150,66371,66442,66997,67037,67121,67629,68275,68549,68612,68953,69270,70799,71819,72119,73804,77605,77891,78294,103573,108000,108911,109145,208628,214444,215387,216080,218210,218914,229841,268697,327762	Bub1b,Bub3,Cdk1,Cdk7,Smc3,Smc2,Hsp90aa1,Mcm3,Mcm2,Mcm4,Mcm6,Mcm7,Mnat1,Nup50,Orc1,Pcm1,Pcnt,Plk1,Pola1,Pold2,Pole,Psmc5,Kif20a,Ranbp2,Rangap1,Tuba3a,Orc5,Gtse1,Psmd10,Cks1b,Ncapg,Mad2l1,Chmp4c,Spc25,Psmd12,Pmf1,Mastl,Spc24,Rpa1,Sgo2a,Ube2c,Chmp2a,Gins1,Cep192,Kif23,Tpx2,Kif2c,H2az2,Ube2s,Rps27a,Xpo1,Cenpf,Rcc2,Gins4,Kntc1,Cdk5rap2,Ncaph,Ube2d1,Nup153,Wapl,Cenpe,Ccnb1,Dna2
3_Member	GO Biological Processes	GO:1903047	mitotic cell cycle process	-24.8007	-21.1239	73/685	11920,12236,12237,12534,12704,13006,13194,13605,14211,16551,16580,17215,17216,17217,17219,17420,17685,17865,18392,18541,18817,18854,18968,18973,19090,19348,19891,21335,22687,51810,54124,54392,56150,66165,66197,66371,66442,67121,68549,68612,68743,68953,69270,69716,70218,70799,71819,72119,73804,77011,77891,84092,100683,108000,108911,110033,116871,208628,208643,214444,215387,218850,218977,226026,227…	Atm,Bub1b,Bub3,Cdk1,Cit,Smc3,Ddb1,Ect2,Smc2,Kif11,Kifc5b,Mcm3,Mcm2,Mcm4,Mcm6,Mnat1,Msh2,Mybl2,Orc1,Pcnt,Plk1,Pml,Pola1,Pole,Prkdc,Kif20a,Rpa2,Tacc3,Zpr1,Hnrnpu,Cks1b,Ncapg,Mad2l1,Bccip,Cks2,Chmp4c,Spc25,Mastl,Sgo2a,Ube2c,Anln,Chmp2a,Gins1,Trip13,Kif18b,Cep192,Kif23,Tpx2,Kif2c,Ticrr,Ube2s,Usp8,Trrap,Cenpf,Rcc2,Kif22,Mta3,Kntc1,Eif4g1,Cdk5rap2,Ncaph,Tasor,Dlgap5,Smc5,Gigyf2,Cenpe,Wdr62,Prc1,Kif20b,…
3_Member	Reactome Gene Sets	R-MMU-1640170	Cell Cycle	-24.4313	-20.8337	67/587	11920,12236,12237,12534,12572,13006,14211,15519,17215,17216,17217,17219,17220,17420,18141,18392,18536,18541,18817,18968,18972,18973,19184,19348,19386,19387,20892,21749,22144,26429,29870,53380,54124,54392,56150,66371,66442,66997,67037,67121,67629,68275,68549,68612,68953,69270,70620,70799,71819,72119,73804,77605,77891,78294,103573,108000,108911,109145,208628,214444,215387,216080,218210,218914,22984…	Atm,Bub1b,Bub3,Cdk1,Cdk7,Smc3,Smc2,Hsp90aa1,Mcm3,Mcm2,Mcm4,Mcm6,Mcm7,Mnat1,Nup50,Orc1,Pcm1,Pcnt,Plk1,Pola1,Pold2,Pole,Psmc5,Kif20a,Ranbp2,Rangap1,Cenpx,Terf1,Tuba3a,Orc5,Gtse1,Psmd10,Cks1b,Ncapg,Mad2l1,Chmp4c,Spc25,Psmd12,Pmf1,Mastl,Spc24,Rpa1,Sgo2a,Ube2c,Chmp2a,Gins1,Ube2v2,Cep192,Kif23,Tpx2,Kif2c,H2az2,Ube2s,Rps27a,Xpo1,Cenpf,Rcc2,Gins4,Kntc1,Cdk5rap2,Ncaph,Ube2d1,Nup153,Wapl,Cenpe,Ccnb1,Dna2
3_Member	GO Biological Processes	GO:0007059	chromosome segregation	-21.997	-18.5242	48/330	11920,12236,12237,12704,13006,13605,13990,14211,17350,18817,20892,21335,21749,21976,23825,24086,50878,51810,54204,54392,56150,66371,66385,66442,67037,68549,68612,68953,69716,70218,70799,71514,71819,73804,80913,108000,108911,110033,208628,210711,214444,215387,218914,218977,226026,229841,233406,268697	Atm,Bub1b,Bub3,Cit,Smc3,Ect2,Smarcad1,Smc2,Mlh1,Plk1,Cenpx,Tacc3,Terf1,Top3b,Banf1,Tlk2,Stag3,Hnrnpu,Septin1,Ncapg,Mad2l1,Chmp4c,Ppp1r7,Spc25,Pmf1,Sgo2a,Ube2c,Chmp2a,Trip13,Kif18b,Cep192,Sfpq,Kif23,Kif2c,Pum2,Cenpf,Rcc2,Kif22,Kntc1,Mcmbp,Cdk5rap2,Ncaph,Wapl,Dlgap5,Smc5,Cenpe,Prc1,Ccnb1
3_Member	GO Biological Processes	GO:0033044	regulation of chromosome organization	-18.4819	-15.22	41/288	11920,12236,12237,12704,15381,16468,17216,17420,18817,18854,19360,20174,20185,21335,21749,21849,24116,50912,51810,51869,52463,56150,68549,68612,69716,70799,71514,72162,93759,99982,107951,208628,214444,218850,218914,226026,229841,237107,245000,268697,328572	Atm,Bub1b,Bub3,Cit,Hnrnpc,Jarid2,Mcm2,Mnat1,Plk1,Pml,Rad50,Ruvbl2,Ncor1,Tacc3,Terf1,Trim28,Nelfa,Exosc10,Hnrnpu,Rif1,Tet1,Mad2l1,Sgo2a,Ube2c,Trip13,Cep192,Sfpq,Dhx36,Sirt1,Kdm1a,Cdk9,Kntc1,Cdk5rap2,Tasor,Wapl,Smc5,Cenpe,Gnl3l,Atr,Ccnb1,Ep300
3_Member	GO Biological Processes	GO:0098813	nuclear chromosome segregation	-17.9976	-14.768	39/267	11920,12236,12237,12704,13006,13605,14211,17350,18817,20892,21335,21749,50878,51810,54204,54392,56150,66371,68549,68612,68953,69716,70218,70799,71514,71819,73804,108000,108911,110033,208628,210711,214444,215387,218914,226026,229841,233406,268697	Atm,Bub1b,Bub3,Cit,Smc3,Ect2,Smc2,Mlh1,Plk1,Cenpx,Tacc3,Terf1,Stag3,Hnrnpu,Septin1,Ncapg,Mad2l1,Chmp4c,Sgo2a,Ube2c,Chmp2a,Trip13,Kif18b,Cep192,Sfpq,Kif23,Kif2c,Cenpf,Rcc2,Kif22,Kntc1,Mcmbp,Cdk5rap2,Ncaph,Wapl,Smc5,Cenpe,Prc1,Ccnb1
3_Member	GO Biological Processes	GO:0000819	sister chromatid segregation	-17.1267	-13.955	32/184	11920,12236,12237,12704,13006,14211,18817,21335,50878,51810,54392,56150,66371,68549,68612,68953,69716,70218,70799,71514,71819,73804,110033,208628,210711,214444,215387,218914,226026,229841,233406,268697	Atm,Bub1b,Bub3,Cit,Smc3,Smc2,Plk1,Tacc3,Stag3,Hnrnpu,Ncapg,Mad2l1,Chmp4c,Sgo2a,Ube2c,Chmp2a,Trip13,Kif18b,Cep192,Sfpq,Kif23,Kif2c,Kif22,Kntc1,Mcmbp,Cdk5rap2,Ncaph,Wapl,Smc5,Cenpe,Prc1,Ccnb1
3_Member	GO Biological Processes	GO:0000280	nuclear division	-16.2017	-13.0564	47/435	11920,12236,12237,12316,12704,13006,14211,16551,16580,17350,17686,17865,18817,20892,21335,21749,50878,51810,54204,54392,54427,56150,66165,66197,66371,67121,68549,68612,68953,69716,70218,70799,71819,72119,73804,77891,110033,208628,214444,215387,218850,223593,226026,229841,233406,240641,268697	Atm,Bub1b,Bub3,Aspm,Cit,Smc3,Smc2,Kif11,Kifc5b,Mlh1,Msh3,Mybl2,Plk1,Cenpx,Tacc3,Terf1,Stag3,Hnrnpu,Septin1,Ncapg,Dnmt3l,Mad2l1,Bccip,Cks2,Chmp4c,Mastl,Sgo2a,Ube2c,Chmp2a,Trip13,Kif18b,Cep192,Kif23,Tpx2,Kif2c,Ube2s,Kif22,Kntc1,Cdk5rap2,Ncaph,Tasor,Washc5,Smc5,Cenpe,Prc1,Kif20b,Ccnb1
3_Member	GO Biological Processes	GO:0051301	cell division	-15.9963	-12.8992	55/591	12236,12237,12316,12534,12572,12704,13006,13605,14211,15201,16551,17979,18817,19348,20892,21335,21749,21853,23988,28114,51810,54124,54204,56150,66197,66371,66442,67037,67121,67629,67903,68549,68612,68743,68953,70218,71819,72119,73804,75669,77891,84092,108911,192119,208628,210711,215387,217325,218914,223593,226026,229841,233406,240641,268697	Bub1b,Bub3,Aspm,Cdk1,Cdk7,Cit,Smc3,Ect2,Smc2,Hells,Kif11,Ncoa3,Plk1,Kif20a,Cenpx,Tacc3,Terf1,Timeless,Pin1,Nsun2,Hnrnpu,Cks1b,Septin1,Mad2l1,Cks2,Chmp4c,Spc25,Pmf1,Mastl,Spc24,Gipc1,Sgo2a,Ube2c,Anln,Chmp2a,Kif18b,Kif23,Tpx2,Kif2c,Pik3r4,Ube2s,Usp8,Rcc2,Dicer1,Kntc1,Mcmbp,Ncaph,Llgl2,Wapl,Washc5,Smc5,Cenpe,Prc1,Kif20b,Ccnb1
3_Member	Reactome Gene Sets	R-MMU-68886	M Phase	-15.9712	-12.8964	44/388	12236,12237,12534,13006,14211,15519,18141,18536,18541,18817,19184,19348,19386,19387,22144,53380,54392,56150,66371,66442,66997,67037,67121,67629,68549,68612,68953,70799,71819,73804,77605,77891,78294,103573,108000,108911,208628,214444,215387,216080,218210,218914,229841,268697	Bub1b,Bub3,Cdk1,Smc3,Smc2,Hsp90aa1,Nup50,Pcm1,Pcnt,Plk1,Psmc5,Kif20a,Ranbp2,Rangap1,Tuba3a,Psmd10,Ncapg,Mad2l1,Chmp4c,Spc25,Psmd12,Pmf1,Mastl,Spc24,Sgo2a,Ube2c,Chmp2a,Cep192,Kif23,Kif2c,H2az2,Ube2s,Rps27a,Xpo1,Cenpf,Rcc2,Kntc1,Cdk5rap2,Ncaph,Ube2d1,Nup153,Wapl,Cenpe,Ccnb1
3_Member	GO Biological Processes	GO:0000075	cell cycle checkpoint	-15.9096	-12.8762	30/175	11920,12236,12237,12534,17685,18392,18817,18854,19090,19891,21853,28000,28114,53817,56150,66371,69716,70799,71702,77011,77065,100683,208628,214444,227331,229841,235323,245000,268697,327762	Atm,Bub1b,Bub3,Cdk1,Msh2,Orc1,Plk1,Pml,Prkdc,Rpa2,Timeless,Prpf19,Nsun2,Ddx39b,Mad2l1,Chmp4c,Trip13,Cep192,Cdc5l,Ticrr,Ints7,Trrap,Kntc1,Cdk5rap2,Gigyf2,Cenpe,Usp28,Atr,Ccnb1,Dna2
3_Member	Reactome Gene Sets	R-MMU-69620	Cell Cycle Checkpoints	-15.6916	-12.7137	37/279	11920,12236,12237,12534,17215,17216,17217,17219,17220,18392,18817,19184,19386,19387,26429,29870,53380,56150,66442,66997,67037,67629,68275,68549,68612,70620,73804,77891,78294,103573,108000,108911,208628,216080,229841,268697,327762	Atm,Bub1b,Bub3,Cdk1,Mcm3,Mcm2,Mcm4,Mcm6,Mcm7,Orc1,Plk1,Psmc5,Ranbp2,Rangap1,Orc5,Gtse1,Psmd10,Mad2l1,Spc25,Psmd12,Pmf1,Spc24,Rpa1,Sgo2a,Ube2c,Ube2v2,Kif2c,Ube2s,Rps27a,Xpo1,Cenpf,Rcc2,Kntc1,Ube2d1,Cenpe,Ccnb1,Dna2
3_Member	GO Biological Processes	GO:0048285	organelle fission	-15.4773	-12.5164	49/491	11920,12236,12237,12316,12704,13006,14211,16551,16580,17350,17686,17865,18817,20892,21335,21749,50878,51810,54204,54392,54427,56150,56749,66165,66197,66371,67121,68549,68612,68953,69716,70218,70799,71819,72108,72119,73804,77891,110033,208628,214444,215387,218850,223593,226026,229841,233406,240641,268697	Atm,Bub1b,Bub3,Aspm,Cit,Smc3,Smc2,Kif11,Kifc5b,Mlh1,Msh3,Mybl2,Plk1,Cenpx,Tacc3,Terf1,Stag3,Hnrnpu,Septin1,Ncapg,Dnmt3l,Mad2l1,Dhodh,Bccip,Cks2,Chmp4c,Mastl,Sgo2a,Ube2c,Chmp2a,Trip13,Kif18b,Cep192,Kif23,Ddhd2,Tpx2,Kif2c,Ube2s,Kif22,Kntc1,Cdk5rap2,Ncaph,Tasor,Washc5,Smc5,Cenpe,Prc1,Kif20b,Ccnb1
3_Member	GO Biological Processes	GO:2001251	negative regulation of chromosome organization	-15.4289	-12.4845	22/88	11920,12236,12237,15381,17216,17420,18817,18854,19360,21749,50912,51810,52463,56150,69716,70799,208628,214444,218914,229841,237107,268697	Atm,Bub1b,Bub3,Hnrnpc,Mcm2,Mnat1,Plk1,Pml,Rad50,Terf1,Exosc10,Hnrnpu,Tet1,Mad2l1,Trip13,Cep192,Kntc1,Cdk5rap2,Wapl,Cenpe,Gnl3l,Ccnb1
3_Member	GO Biological Processes	GO:0140014	mitotic nuclear division	-15.0491	-12.1357	36/276	11920,12236,12237,12704,13006,14211,16551,16580,17865,18817,21335,51810,54392,56150,66165,66371,68549,68612,68953,69716,70218,70799,71819,72119,73804,77891,110033,208628,214444,215387,218850,226026,229841,233406,240641,268697	Atm,Bub1b,Bub3,Cit,Smc3,Smc2,Kif11,Kifc5b,Mybl2,Plk1,Tacc3,Hnrnpu,Ncapg,Mad2l1,Bccip,Chmp4c,Sgo2a,Ube2c,Chmp2a,Trip13,Kif18b,Cep192,Kif23,Tpx2,Kif2c,Ube2s,Kif22,Kntc1,Cdk5rap2,Ncaph,Tasor,Smc5,Cenpe,Prc1,Kif20b,Ccnb1
3_Member	GO Biological Processes	GO:0000070	mitotic sister chromatid segregation	-14.6267	-11.7422	27/154	11920,12236,12237,12704,14211,18817,21335,51810,54392,56150,66371,68549,68612,68953,69716,70218,70799,71819,73804,110033,208628,214444,215387,226026,229841,233406,268697	Atm,Bub1b,Bub3,Cit,Smc2,Plk1,Tacc3,Hnrnpu,Ncapg,Mad2l1,Chmp4c,Sgo2a,Ube2c,Chmp2a,Trip13,Kif18b,Cep192,Kif23,Kif2c,Kif22,Kntc1,Cdk5rap2,Ncaph,Smc5,Cenpe,Prc1,Ccnb1
3_Member	Reactome Gene Sets	R-MMU-68877	Mitotic Prometaphase	-14.0827	-11.2867	29/189	12236,12237,12534,13006,14211,15519,18536,18541,18817,19386,19387,22144,54392,56150,66442,67037,67629,68549,70799,73804,103573,108000,108911,208628,214444,215387,218914,229841,268697	Bub1b,Bub3,Cdk1,Smc3,Smc2,Hsp90aa1,Pcm1,Pcnt,Plk1,Ranbp2,Rangap1,Tuba3a,Ncapg,Mad2l1,Spc25,Pmf1,Spc24,Sgo2a,Cep192,Kif2c,Xpo1,Cenpf,Rcc2,Kntc1,Cdk5rap2,Ncaph,Wapl,Cenpe,Ccnb1
3_Member	GO Biological Processes	GO:0051983	regulation of chromosome segregation	-13.6393	-10.8763	20/84	11920,12236,12237,12704,18817,21335,51810,56150,68612,69716,70799,73804,80913,108911,208628,214444,218914,226026,229841,268697	Atm,Bub1b,Bub3,Cit,Plk1,Tacc3,Hnrnpu,Mad2l1,Ube2c,Trip13,Cep192,Kif2c,Pum2,Rcc2,Kntc1,Cdk5rap2,Wapl,Smc5,Cenpe,Ccnb1
3_Member	Reactome Gene Sets	R-MMU-68882	Mitotic Anaphase	-13.4151	-10.6925	30/215	12236,12237,12534,13006,18817,19184,19386,19387,22144,53380,56150,66371,66442,66997,67037,67629,68549,68612,68953,73804,77891,78294,103573,108000,108911,208628,216080,218914,229841,268697	Bub1b,Bub3,Cdk1,Smc3,Plk1,Psmc5,Ranbp2,Rangap1,Tuba3a,Psmd10,Mad2l1,Chmp4c,Spc25,Psmd12,Pmf1,Spc24,Sgo2a,Ube2c,Chmp2a,Kif2c,Ube2s,Rps27a,Xpo1,Cenpf,Rcc2,Kntc1,Ube2d1,Wapl,Cenpe,Ccnb1
3_Member	Reactome Gene Sets	R-MMU-2555396	Mitotic Metaphase and Anaphase	-13.3605	-10.6474	30/216	12236,12237,12534,13006,18817,19184,19386,19387,22144,53380,56150,66371,66442,66997,67037,67629,68549,68612,68953,73804,77891,78294,103573,108000,108911,208628,216080,218914,229841,268697	Bub1b,Bub3,Cdk1,Smc3,Plk1,Psmc5,Ranbp2,Rangap1,Tuba3a,Psmd10,Mad2l1,Chmp4c,Spc25,Psmd12,Pmf1,Spc24,Sgo2a,Ube2c,Chmp2a,Kif2c,Ube2s,Rps27a,Xpo1,Cenpf,Rcc2,Kntc1,Ube2d1,Wapl,Cenpe,Ccnb1
3_Member	GO Biological Processes	GO:0044772	mitotic cell cycle phase transition	-12.0129	-9.40795	38/383	11920,12236,12237,12534,12704,13194,17420,18392,18817,18854,18973,19090,19891,21335,22687,54124,56150,66197,66371,67121,68612,68953,69716,70799,77011,77891,108000,108911,116871,208628,208643,214444,226026,227331,229841,268697,404710,636931	Atm,Bub1b,Bub3,Cdk1,Cit,Ddb1,Mnat1,Orc1,Plk1,Pml,Pole,Prkdc,Rpa2,Tacc3,Zpr1,Cks1b,Mad2l1,Cks2,Chmp4c,Mastl,Ube2c,Chmp2a,Trip13,Cep192,Ticrr,Ube2s,Cenpf,Rcc2,Mta3,Kntc1,Eif4g1,Cdk5rap2,Smc5,Gigyf2,Cenpe,Ccnb1,Iqgap3,Trim71
3_Member	Reactome Gene Sets	R-MMU-2467813	Separation of Sister Chromatids	-11.8877	-9.2905	26/183	12236,12237,13006,18817,19184,19386,19387,22144,53380,56150,66442,66997,67037,67629,68549,68612,73804,77891,78294,103573,108000,108911,208628,216080,218914,229841	Bub1b,Bub3,Smc3,Plk1,Psmc5,Ranbp2,Rangap1,Tuba3a,Psmd10,Mad2l1,Spc25,Psmd12,Pmf1,Spc24,Sgo2a,Ube2c,Kif2c,Ube2s,Rps27a,Xpo1,Cenpf,Rcc2,Kntc1,Ube2d1,Wapl,Cenpe
3_Member	Reactome Gene Sets	R-MMU-2500257	Resolution of Sister Chromatid Cohesion	-11.6401	-9.10311	21/118	12236,12237,12534,13006,18817,19386,19387,22144,56150,66442,67037,67629,68549,73804,103573,108000,108911,208628,218914,229841,268697	Bub1b,Bub3,Cdk1,Smc3,Plk1,Ranbp2,Rangap1,Tuba3a,Mad2l1,Spc25,Pmf1,Spc24,Sgo2a,Kif2c,Xpo1,Cenpf,Rcc2,Kntc1,Wapl,Cenpe,Ccnb1
3_Member	GO Biological Processes	GO:0010564	regulation of cell cycle process	-11.35	-8.84339	48/608	11920,12236,12237,12534,12704,13194,13605,16551,18392,18432,18817,18854,19090,19348,19891,21335,23988,51810,56150,66371,67444,67903,68549,68612,68953,69716,70799,71514,71819,72119,75669,77011,93759,103573,107951,108000,108911,116871,208628,208643,214444,218914,226026,227331,229841,233406,240641,268697	Atm,Bub1b,Bub3,Cdk1,Cit,Ddb1,Ect2,Kif11,Orc1,Mybbp1a,Plk1,Pml,Prkdc,Kif20a,Rpa2,Tacc3,Pin1,Hnrnpu,Mad2l1,Chmp4c,Ilkap,Gipc1,Sgo2a,Ube2c,Chmp2a,Trip13,Cep192,Sfpq,Kif23,Tpx2,Pik3r4,Ticrr,Sirt1,Xpo1,Cdk9,Cenpf,Rcc2,Mta3,Kntc1,Eif4g1,Cdk5rap2,Wapl,Smc5,Gigyf2,Cenpe,Prc1,Kif20b,Ccnb1
3_Member	GO Biological Processes	GO:0044770	cell cycle phase transition	-11.2875	-8.78673	39/424	11920,12236,12237,12534,12704,13194,17420,18392,18817,18854,18973,19090,19891,21335,21853,22687,54124,56150,66197,66371,67121,68612,68953,69716,70799,77011,77891,108000,108911,116871,208628,208643,214444,226026,227331,229841,268697,404710,636931	Atm,Bub1b,Bub3,Cdk1,Cit,Ddb1,Mnat1,Orc1,Plk1,Pml,Pole,Prkdc,Rpa2,Tacc3,Timeless,Zpr1,Cks1b,Mad2l1,Cks2,Chmp4c,Mastl,Ube2c,Chmp2a,Trip13,Cep192,Ticrr,Ube2s,Cenpf,Rcc2,Mta3,Kntc1,Eif4g1,Cdk5rap2,Smc5,Gigyf2,Cenpe,Ccnb1,Iqgap3,Trim71
3_Member	GO Biological Processes	GO:0007093	mitotic cell cycle checkpoint	-11.1376	-8.64829	21/125	11920,12236,12237,12534,17685,18392,18817,18854,19090,19891,56150,66371,69716,70799,77011,100683,208628,214444,227331,229841,268697	Atm,Bub1b,Bub3,Cdk1,Msh2,Orc1,Plk1,Pml,Prkdc,Rpa2,Mad2l1,Chmp4c,Trip13,Cep192,Ticrr,Trrap,Kntc1,Cdk5rap2,Gigyf2,Cenpe,Ccnb1
3_Member	GO Biological Processes	GO:0051304	chromosome separation	-10.5404	-8.08891	18/95	11920,12236,12237,12704,13990,17350,18817,20892,21335,56150,68612,69716,70799,208628,214444,215387,229841,268697	Atm,Bub1b,Bub3,Cit,Smarcad1,Mlh1,Plk1,Cenpx,Tacc3,Mad2l1,Ube2c,Trip13,Cep192,Kntc1,Cdk5rap2,Ncaph,Cenpe,Ccnb1
3_Member	Reactome Gene Sets	R-MMU-69618	Mitotic Spindle Checkpoint	-10.4987	-8.05227	19/108	12236,12237,18817,19386,19387,56150,66442,67037,67629,68549,68612,73804,77891,103573,108000,108911,208628,216080,229841	Bub1b,Bub3,Plk1,Ranbp2,Rangap1,Mad2l1,Spc25,Pmf1,Spc24,Sgo2a,Ube2c,Kif2c,Ube2s,Xpo1,Cenpf,Rcc2,Kntc1,Ube2d1,Cenpe
3_Member	GO Biological Processes	GO:0033045	regulation of sister chromatid segregation	-9.9703	-7.54873	15/67	11920,12236,12237,12704,18817,21335,51810,56150,68612,69716,70799,208628,214444,229841,268697	Atm,Bub1b,Bub3,Cit,Plk1,Tacc3,Hnrnpu,Mad2l1,Ube2c,Trip13,Cep192,Kntc1,Cdk5rap2,Cenpe,Ccnb1
3_Member	GO Biological Processes	GO:0007091	metaphase/anaphase transition of mitotic cell cycle	-9.70831	-7.29629	14/59	11920,12236,12237,12704,18817,21335,56150,68612,69716,70799,208628,214444,229841,268697	Atm,Bub1b,Bub3,Cit,Plk1,Tacc3,Mad2l1,Ube2c,Trip13,Cep192,Kntc1,Cdk5rap2,Cenpe,Ccnb1
3_Member	GO Biological Processes	GO:0010965	regulation of mitotic sister chromatid separation	-9.60309	-7.20041	14/60	11920,12236,12237,12704,18817,21335,56150,68612,69716,70799,208628,214444,229841,268697	Atm,Bub1b,Bub3,Cit,Plk1,Tacc3,Mad2l1,Ube2c,Trip13,Cep192,Kntc1,Cdk5rap2,Cenpe,Ccnb1
3_Member	GO Biological Processes	GO:0044784	metaphase/anaphase transition of cell cycle	-9.39904	-7.02323	14/62	11920,12236,12237,12704,18817,21335,56150,68612,69716,70799,208628,214444,229841,268697	Atm,Bub1b,Bub3,Cit,Plk1,Tacc3,Mad2l1,Ube2c,Trip13,Cep192,Kntc1,Cdk5rap2,Cenpe,Ccnb1
3_Member	GO Biological Processes	GO:0051306	mitotic sister chromatid separation	-9.30007	-6.9371	14/63	11920,12236,12237,12704,18817,21335,56150,68612,69716,70799,208628,214444,229841,268697	Atm,Bub1b,Bub3,Cit,Plk1,Tacc3,Mad2l1,Ube2c,Trip13,Cep192,Kntc1,Cdk5rap2,Cenpe,Ccnb1
3_Member	GO Biological Processes	GO:0033047	regulation of mitotic sister chromatid segregation	-9.16714	-6.82475	12/44	11920,12236,12237,18817,51810,56150,69716,70799,208628,214444,229841,268697	Atm,Bub1b,Bub3,Plk1,Hnrnpu,Mad2l1,Trip13,Cep192,Kntc1,Cdk5rap2,Cenpe,Ccnb1
3_Member	Reactome Gene Sets	R-MMU-141424	Amplification of signal from the kinetochores	-8.93472	-6.63079	16/91	12236,12237,18817,19386,19387,56150,66442,67037,67629,68549,73804,103573,108000,108911,208628,229841	Bub1b,Bub3,Plk1,Ranbp2,Rangap1,Mad2l1,Spc25,Pmf1,Spc24,Sgo2a,Kif2c,Xpo1,Cenpf,Rcc2,Kntc1,Cenpe
3_Member	Reactome Gene Sets	R-MMU-141444	Amplification of signal from unattached kinetochores via a MAD2 inhibitory signal	-8.93472	-6.63079	16/91	12236,12237,18817,19386,19387,56150,66442,67037,67629,68549,73804,103573,108000,108911,208628,229841	Bub1b,Bub3,Plk1,Ranbp2,Rangap1,Mad2l1,Spc25,Pmf1,Spc24,Sgo2a,Kif2c,Xpo1,Cenpf,Rcc2,Kntc1,Cenpe
3_Member	GO Biological Processes	GO:1905818	regulation of chromosome separation	-8.92284	-6.62257	14/67	11920,12236,12237,12704,18817,21335,56150,68612,69716,70799,208628,214444,229841,268697	Atm,Bub1b,Bub3,Cit,Plk1,Tacc3,Mad2l1,Ube2c,Trip13,Cep192,Kntc1,Cdk5rap2,Cenpe,Ccnb1
3_Member	GO Biological Processes	GO:0007094	mitotic spindle assembly checkpoint	-8.75709	-6.4747	11/38	11920,12236,12237,18817,56150,69716,70799,208628,214444,229841,268697	Atm,Bub1b,Bub3,Plk1,Mad2l1,Trip13,Cep192,Kntc1,Cdk5rap2,Cenpe,Ccnb1
3_Member	GO Biological Processes	GO:0071173	spindle assembly checkpoint	-8.75709	-6.4747	11/38	11920,12236,12237,18817,56150,69716,70799,208628,214444,229841,268697	Atm,Bub1b,Bub3,Plk1,Mad2l1,Trip13,Cep192,Kntc1,Cdk5rap2,Cenpe,Ccnb1
3_Member	Reactome Gene Sets	R-MMU-9648025	EML4 and NUDC in mitotic spindle formation	-8.74571	-6.46681	17/107	12236,12237,18817,19386,19387,22144,56150,66442,67037,67629,68549,73804,103573,108000,108911,208628,229841	Bub1b,Bub3,Plk1,Ranbp2,Rangap1,Tuba3a,Mad2l1,Spc25,Pmf1,Spc24,Sgo2a,Kif2c,Xpo1,Cenpf,Rcc2,Kntc1,Cenpe
3_Member	GO Biological Processes	GO:0007346	regulation of mitotic cell cycle	-8.70455	-6.43595	36/453	11920,12236,12237,12534,13194,17685,18392,18817,18854,19090,19360,19891,27053,51810,54124,56150,66197,66371,68612,69716,70799,71701,77011,93759,100683,108000,108911,116871,208628,208643,214444,218977,227331,229841,240641,268697	Atm,Bub1b,Bub3,Cdk1,Ddb1,Msh2,Orc1,Plk1,Pml,Prkdc,Rad50,Rpa2,Asns,Hnrnpu,Cks1b,Mad2l1,Cks2,Chmp4c,Ube2c,Trip13,Cep192,Pnpt1,Ticrr,Sirt1,Trrap,Cenpf,Rcc2,Mta3,Kntc1,Eif4g1,Cdk5rap2,Dlgap5,Gigyf2,Cenpe,Kif20b,Ccnb1
3_Member	GO Biological Processes	GO:0045786	negative regulation of cell cycle	-8.70455	-6.43595	36/453	11920,12236,12237,12534,17685,18392,18432,18817,18854,19090,19891,21853,28000,28114,53817,56150,66371,68953,69716,70799,71701,71702,77011,77065,100683,107951,208628,214444,218914,225845,227331,229841,235323,245000,268697,327762	Atm,Bub1b,Bub3,Cdk1,Msh2,Orc1,Mybbp1a,Plk1,Pml,Prkdc,Rpa2,Timeless,Prpf19,Nsun2,Ddx39b,Mad2l1,Chmp4c,Chmp2a,Trip13,Cep192,Pnpt1,Cdc5l,Ticrr,Ints7,Trrap,Cdk9,Kntc1,Cdk5rap2,Wapl,Plaat3,Gigyf2,Cenpe,Usp28,Atr,Ccnb1,Dna2
3_Member	GO Biological Processes	GO:0045841	negative regulation of mitotic metaphase/anaphase transition	-8.4936	-6.25657	11/40	11920,12236,12237,18817,56150,69716,70799,208628,214444,229841,268697	Atm,Bub1b,Bub3,Plk1,Mad2l1,Trip13,Cep192,Kntc1,Cdk5rap2,Cenpe,Ccnb1
3_Member	GO Biological Processes	GO:0071174	mitotic spindle checkpoint	-8.4936	-6.25657	11/40	11920,12236,12237,18817,56150,69716,70799,208628,214444,229841,268697	Atm,Bub1b,Bub3,Plk1,Mad2l1,Trip13,Cep192,Kntc1,Cdk5rap2,Cenpe,Ccnb1
3_Member	GO Biological Processes	GO:0033046	negative regulation of sister chromatid segregation	-8.36798	-6.14446	11/41	11920,12236,12237,18817,56150,69716,70799,208628,214444,229841,268697	Atm,Bub1b,Bub3,Plk1,Mad2l1,Trip13,Cep192,Kntc1,Cdk5rap2,Cenpe,Ccnb1
3_Member	GO Biological Processes	GO:0033048	negative regulation of mitotic sister chromatid segregation	-8.36798	-6.14446	11/41	11920,12236,12237,18817,56150,69716,70799,208628,214444,229841,268697	Atm,Bub1b,Bub3,Plk1,Mad2l1,Trip13,Cep192,Kntc1,Cdk5rap2,Cenpe,Ccnb1
3_Member	GO Biological Processes	GO:2000816	negative regulation of mitotic sister chromatid separation	-8.36798	-6.14446	11/41	11920,12236,12237,18817,56150,69716,70799,208628,214444,229841,268697	Atm,Bub1b,Bub3,Plk1,Mad2l1,Trip13,Cep192,Kntc1,Cdk5rap2,Cenpe,Ccnb1
3_Member	GO Biological Processes	GO:1902100	negative regulation of metaphase/anaphase transition of cell cycle	-8.24613	-6.02868	11/42	11920,12236,12237,18817,56150,69716,70799,208628,214444,229841,268697	Atm,Bub1b,Bub3,Plk1,Mad2l1,Trip13,Cep192,Kntc1,Cdk5rap2,Cenpe,Ccnb1
3_Member	Reactome Gene Sets	R-MMU-5663220	RHO GTPases Activate Formins	-8.12872	-5.92229	18/132	12236,12237,13367,18817,19386,19387,22144,56150,66442,67037,67629,68549,73804,103573,108000,108911,208628,229841	Bub1b,Bub3,Diaph1,Plk1,Ranbp2,Rangap1,Tuba3a,Mad2l1,Spc25,Pmf1,Spc24,Sgo2a,Kif2c,Xpo1,Cenpf,Rcc2,Kntc1,Cenpe
3_Member	GO Biological Processes	GO:0031577	spindle checkpoint	-8.12784	-5.92229	11/43	11920,12236,12237,18817,56150,69716,70799,208628,214444,229841,268697	Atm,Bub1b,Bub3,Plk1,Mad2l1,Trip13,Cep192,Kntc1,Cdk5rap2,Cenpe,Ccnb1
3_Member	GO Biological Processes	GO:1905819	negative regulation of chromosome separation	-8.12784	-5.92229	11/43	11920,12236,12237,18817,56150,69716,70799,208628,214444,229841,268697	Atm,Bub1b,Bub3,Plk1,Mad2l1,Trip13,Cep192,Kntc1,Cdk5rap2,Cenpe,Ccnb1
3_Member	GO Biological Processes	GO:1901991	negative regulation of mitotic cell cycle phase transition	-8.05364	-5.85968	19/149	11920,12236,12237,12534,18392,18817,18854,19090,19891,56150,66371,69716,70799,77011,208628,214444,227331,229841,268697	Atm,Bub1b,Bub3,Cdk1,Orc1,Plk1,Pml,Prkdc,Rpa2,Mad2l1,Chmp4c,Trip13,Cep192,Ticrr,Kntc1,Cdk5rap2,Gigyf2,Cenpe,Ccnb1
3_Member	GO Biological Processes	GO:0051985	negative regulation of chromosome segregation	-8.01294	-5.82182	11/44	11920,12236,12237,18817,56150,69716,70799,208628,214444,229841,268697	Atm,Bub1b,Bub3,Plk1,Mad2l1,Trip13,Cep192,Kntc1,Cdk5rap2,Cenpe,Ccnb1
3_Member	GO Biological Processes	GO:0030071	regulation of mitotic metaphase/anaphase transition	-7.86534	-5.67705	12/56	11920,12236,12237,18817,56150,68612,69716,70799,208628,214444,229841,268697	Atm,Bub1b,Bub3,Plk1,Mad2l1,Ube2c,Trip13,Cep192,Kntc1,Cdk5rap2,Cenpe,Ccnb1
3_Member	GO Biological Processes	GO:1902099	regulation of metaphase/anaphase transition of cell cycle	-7.59349	-5.43842	12/59	11920,12236,12237,18817,56150,68612,69716,70799,208628,214444,229841,268697	Atm,Bub1b,Bub3,Plk1,Mad2l1,Ube2c,Trip13,Cep192,Kntc1,Cdk5rap2,Cenpe,Ccnb1
3_Member	GO Biological Processes	GO:1901990	regulation of mitotic cell cycle phase transition	-7.46173	-5.32145	25/271	11920,12236,12237,12534,13194,18392,18817,18854,19090,19891,56150,66371,68612,69716,70799,77011,108000,108911,116871,208628,208643,214444,227331,229841,268697	Atm,Bub1b,Bub3,Cdk1,Ddb1,Orc1,Plk1,Pml,Prkdc,Rpa2,Mad2l1,Chmp4c,Ube2c,Trip13,Cep192,Ticrr,Cenpf,Rcc2,Mta3,Kntc1,Eif4g1,Cdk5rap2,Gigyf2,Cenpe,Ccnb1
3_Member	GO Biological Processes	GO:0045839	negative regulation of mitotic nuclear division	-7.38553	-5.25253	11/50	11920,12236,12237,18817,56150,69716,70799,208628,214444,229841,268697	Atm,Bub1b,Bub3,Plk1,Mad2l1,Trip13,Cep192,Kntc1,Cdk5rap2,Cenpe,Ccnb1
3_Member	GO Biological Processes	GO:1901988	negative regulation of cell cycle phase transition	-7.28094	-5.1652	19/166	11920,12236,12237,12534,18392,18817,18854,19090,19891,56150,66371,69716,70799,77011,208628,214444,227331,229841,268697	Atm,Bub1b,Bub3,Cdk1,Orc1,Plk1,Pml,Prkdc,Rpa2,Mad2l1,Chmp4c,Trip13,Cep192,Ticrr,Kntc1,Cdk5rap2,Gigyf2,Cenpe,Ccnb1
3_Member	GO Biological Processes	GO:0045930	negative regulation of mitotic cell cycle	-6.98151	-4.91533	22/228	11920,12236,12237,12534,17685,18392,18817,18854,19090,19891,56150,66371,69716,70799,71701,77011,100683,208628,214444,227331,229841,268697	Atm,Bub1b,Bub3,Cdk1,Msh2,Orc1,Plk1,Pml,Prkdc,Rpa2,Mad2l1,Chmp4c,Trip13,Cep192,Pnpt1,Ticrr,Trrap,Kntc1,Cdk5rap2,Gigyf2,Cenpe,Ccnb1
3_Member	Reactome Gene Sets	R-MMU-195258	RHO GTPase Effectors	-6.93027	-4.86832	26/309	12236,12237,12704,13367,18817,19386,19387,22144,23988,56150,66442,67037,67629,68549,73804,75669,76804,77605,99982,103573,108000,108911,208628,229841,233406,404710	Bub1b,Bub3,Cit,Diaph1,Plk1,Ranbp2,Rangap1,Tuba3a,Pin1,Mad2l1,Spc25,Pmf1,Spc24,Sgo2a,Kif2c,Pik3r4,Kdm4c,H2az2,Kdm1a,Xpo1,Cenpf,Rcc2,Kntc1,Cenpe,Prc1,Iqgap3
3_Member	GO Biological Processes	GO:0010948	negative regulation of cell cycle process	-6.91453	-4.85469	22/230	11920,12236,12237,12534,18392,18817,18854,19090,19891,56150,66371,68953,69716,70799,77011,107951,208628,214444,218914,227331,229841,268697	Atm,Bub1b,Bub3,Cdk1,Orc1,Plk1,Pml,Prkdc,Rpa2,Mad2l1,Chmp4c,Chmp2a,Trip13,Cep192,Ticrr,Cdk9,Kntc1,Cdk5rap2,Wapl,Gigyf2,Cenpe,Ccnb1
3_Member	GO Biological Processes	GO:0010639	negative regulation of organelle organization	-6.67761	-4.64422	28/361	11920,12236,12237,14775,15381,17216,17420,18817,18854,19360,21749,21872,50912,51810,52463,53380,56150,69716,70799,72119,102098,208628,214444,218914,229841,237107,268697,319801	Atm,Bub1b,Bub3,Gpx1,Hnrnpc,Mcm2,Mnat1,Plk1,Pml,Rad50,Terf1,Tjp1,Exosc10,Hnrnpu,Tet1,Psmd10,Mad2l1,Trip13,Cep192,Tpx2,Arhgef18,Kntc1,Cdk5rap2,Wapl,Cenpe,Gnl3l,Ccnb1,Tigar
3_Member	GO Biological Processes	GO:0051784	negative regulation of nuclear division	-6.52311	-4.51466	11/60	11920,12236,12237,18817,56150,69716,70799,208628,214444,229841,268697	Atm,Bub1b,Bub3,Plk1,Mad2l1,Trip13,Cep192,Kntc1,Cdk5rap2,Cenpe,Ccnb1
3_Member	GO Biological Processes	GO:1901987	regulation of cell cycle phase transition	-6.47154	-4.47048	25/305	11920,12236,12237,12534,13194,18392,18817,18854,19090,19891,56150,66371,68612,69716,70799,77011,108000,108911,116871,208628,208643,214444,227331,229841,268697	Atm,Bub1b,Bub3,Cdk1,Ddb1,Orc1,Plk1,Pml,Prkdc,Rpa2,Mad2l1,Chmp4c,Ube2c,Trip13,Cep192,Ticrr,Cenpf,Rcc2,Mta3,Kntc1,Eif4g1,Cdk5rap2,Gigyf2,Cenpe,Ccnb1
3_Member	GO Biological Processes	GO:0051129	negative regulation of cellular component organization	-6.3235	-4.34926	44/764	11920,12236,12237,12704,14775,14897,15381,15481,16210,16468,17216,17420,18817,18854,19360,19664,20926,21749,21872,50912,51810,52463,53380,56150,56612,69716,70790,70799,72119,76804,93759,99982,102098,104263,108911,192197,208628,214444,218914,229841,237107,268697,319801,328572	Atm,Bub1b,Bub3,Cit,Gpx1,Trip12,Hnrnpc,Hspa8,Impact,Jarid2,Mcm2,Mnat1,Plk1,Pml,Rad50,Rbpj,Supt6,Terf1,Tjp1,Exosc10,Hnrnpu,Tet1,Psmd10,Mad2l1,Pfdn5,Trip13,Ubr5,Cep192,Tpx2,Kdm4c,Sirt1,Kdm1a,Arhgef18,Kdm3a,Rcc2,Bcas3,Kntc1,Cdk5rap2,Wapl,Cenpe,Gnl3l,Ccnb1,Tigar,Ep300
3_Member	Reactome Gene Sets	R-MMU-194315	Signaling by Rho GTPases	-6.11403	-4.16797	39/649	12236,12237,12704,13367,13605,14163,15381,15519,18817,19386,19387,21873,22144,23988,53382,53817,56150,66442,67037,67629,68549,68743,68813,73804,75669,76804,77605,83397,99982,102098,103573,108000,108911,208628,229841,233406,238505,269608,404710	Bub1b,Bub3,Cit,Diaph1,Ect2,Fgd1,Hnrnpc,Hsp90aa1,Plk1,Ranbp2,Rangap1,Tjp2,Tuba3a,Pin1,Txnl1,Ddx39b,Mad2l1,Spc25,Pmf1,Spc24,Sgo2a,Anln,Dock5,Kif2c,Pik3r4,Kdm4c,H2az2,Akap12,Kdm1a,Arhgef18,Xpo1,Cenpf,Rcc2,Kntc1,Cenpe,Prc1,Mtr,Plekhg5,Iqgap3
3_Member	Reactome Gene Sets	R-MMU-9716542	Signaling by Rho GTPases, Miro GTPases and RHOBTB3	-5.86991	-3.95949	39/664	12236,12237,12704,13367,13605,14163,15381,15519,18817,19386,19387,21873,22144,23988,53382,53817,56150,66442,67037,67629,68549,68743,68813,73804,75669,76804,77605,83397,99982,102098,103573,108000,108911,208628,229841,233406,238505,269608,404710	Bub1b,Bub3,Cit,Diaph1,Ect2,Fgd1,Hnrnpc,Hsp90aa1,Plk1,Ranbp2,Rangap1,Tjp2,Tuba3a,Pin1,Txnl1,Ddx39b,Mad2l1,Spc25,Pmf1,Spc24,Sgo2a,Anln,Dock5,Kif2c,Pik3r4,Kdm4c,H2az2,Akap12,Kdm1a,Arhgef18,Xpo1,Cenpf,Rcc2,Kntc1,Cenpe,Prc1,Mtr,Plekhg5,Iqgap3
3_Member	GO Biological Processes	GO:0007088	regulation of mitotic nuclear division	-4.6893	-2.93258	12/108	11920,12236,12237,18817,56150,69716,70799,208628,214444,229841,240641,268697	Atm,Bub1b,Bub3,Plk1,Mad2l1,Trip13,Cep192,Kntc1,Cdk5rap2,Cenpe,Kif20b,Ccnb1
3_Member	GO Biological Processes	GO:0051783	regulation of nuclear division	-3.53455	-1.93978	12/142	11920,12236,12237,18817,56150,69716,70799,208628,214444,229841,240641,268697	Atm,Bub1b,Bub3,Plk1,Mad2l1,Trip13,Cep192,Kntc1,Cdk5rap2,Cenpe,Kif20b,Ccnb1
4_Summary	GO Molecular Functions	GO:0016887	ATPase activity	-23.4124	-19.8817	58/458	11834,12572,13211,13681,13990,15201,15481,15519,16551,16580,17215,17216,17217,17219,17220,17350,17685,17686,17688,19184,19348,19360,20174,20585,24015,27225,27407,50497,52513,53817,53975,56495,67459,68058,68278,70218,71819,72047,72162,72198,73804,77591,78455,107182,107932,110033,117599,192119,192170,209737,217207,227099,228889,229841,239273,240641,269254,327762	Aqr,Cdk7,Dhx9,Eif4a1,Smarcad1,Hells,Hspa8,Hsp90aa1,Kif11,Kifc5b,Mcm3,Mcm2,Mcm4,Mcm6,Mcm7,Mlh1,Msh2,Msh3,Msh6,Psmc5,Kif20a,Rad50,Ruvbl2,Hltf,Abce1,Ddx24,Abcf2,Hspa14,Ddx56,Ddx39b,Ddx20,Get3,Nvl,Chd1l,Ddx39a,Kif18b,Kif23,Ddx42,Dhx36,Mtrex,Kif2c,Ddx10,Helz,Btaf1,Chd4,Kif22,Helb,Dicer1,Eif4a3,Kif15,Dhx8,Pms1,Ddx27,Cenpe,Abcc4,Kif20b,Setx,Dna2
4_Member	GO Molecular Functions	GO:0016887	ATPase activity	-23.4124	-19.8817	58/458	11834,12572,13211,13681,13990,15201,15481,15519,16551,16580,17215,17216,17217,17219,17220,17350,17685,17686,17688,19184,19348,19360,20174,20585,24015,27225,27407,50497,52513,53817,53975,56495,67459,68058,68278,70218,71819,72047,72162,72198,73804,77591,78455,107182,107932,110033,117599,192119,192170,209737,217207,227099,228889,229841,239273,240641,269254,327762	Aqr,Cdk7,Dhx9,Eif4a1,Smarcad1,Hells,Hspa8,Hsp90aa1,Kif11,Kifc5b,Mcm3,Mcm2,Mcm4,Mcm6,Mcm7,Mlh1,Msh2,Msh3,Msh6,Psmc5,Kif20a,Rad50,Ruvbl2,Hltf,Abce1,Ddx24,Abcf2,Hspa14,Ddx56,Ddx39b,Ddx20,Get3,Nvl,Chd1l,Ddx39a,Kif18b,Kif23,Ddx42,Dhx36,Mtrex,Kif2c,Ddx10,Helz,Btaf1,Chd4,Kif22,Helb,Dicer1,Eif4a3,Kif15,Dhx8,Pms1,Ddx27,Cenpe,Abcc4,Kif20b,Setx,Dna2
4_Member	GO Molecular Functions	GO:0004386	helicase activity	-20.2059	-16.8301	32/147	11834,13211,13681,13990,15201,17215,17216,17217,17219,17220,19360,20174,20585,27225,52513,53817,53975,68058,68278,72047,72162,72198,77591,78455,107932,117599,192119,192170,217207,228889,269254,327762	Aqr,Dhx9,Eif4a1,Smarcad1,Hells,Mcm3,Mcm2,Mcm4,Mcm6,Mcm7,Rad50,Ruvbl2,Hltf,Ddx24,Ddx56,Ddx39b,Ddx20,Chd1l,Ddx39a,Ddx42,Dhx36,Mtrex,Ddx10,Helz,Chd4,Helb,Dicer1,Eif4a3,Dhx8,Ddx27,Setx,Dna2
5_Summary	GO Biological Processes	GO:0022613	ribonucleoprotein complex biogenesis	-21.123	-17.7014	52/408	11837,11920,12181,12607,13211,14300,15519,16865,18432,19090,20068,20174,24015,28000,50912,52513,53817,53975,56095,66603,67439,67459,67619,67674,67832,69072,69713,70683,70930,72198,72462,72662,74035,77591,102462,102614,103573,108143,109075,117599,192119,207932,213773,225348,228889,234549,237107,245000,269254,353258,382038,433864,18033,18130,28114,58523,66757,67005,67010,67417,68276,68626,70650,717…	Rplp0,Atm,Bop1,Cebpz,Dhx9,Frg1,Hsp90aa1,Eif2d,Mybbp1a,Prkdc,Rps17,Ruvbl2,Abce1,Prpf19,Exosc10,Ddx56,Ddx39b,Ddx20,Ftsj3,Gemin2,Xab2,Nvl,Nob1,Trmt112,Brix1,Ebna1bp2,Pin4,Utp20,Nol8,Mtrex,Rrp1b,Dis3,Nol9,Ddx10,Imp3,Rpp25,Xpo1,Taf9,Exosc4,Helb,Dicer1,Urb1,Tbl3,Wdr36,Ddx27,Heatr3,Gnl3l,Atr,Setx,Ltv1,Urb2,Nom1,Nfkb1,Ints6,Nsun2,Elp2,Adat2,Polr3k,Rbm7,Ears2,Toe1,Elac2,Zcchc8,Pnpt1,Ints7,Pus7,Dgcr8,Ints4…
5_Member	GO Biological Processes	GO:0022613	ribonucleoprotein complex biogenesis	-21.123	-17.7014	52/408	11837,11920,12181,12607,13211,14300,15519,16865,18432,19090,20068,20174,24015,28000,50912,52513,53817,53975,56095,66603,67439,67459,67619,67674,67832,69072,69713,70683,70930,72198,72462,72662,74035,77591,102462,102614,103573,108143,109075,117599,192119,207932,213773,225348,228889,234549,237107,245000,269254,353258,382038,433864	Rplp0,Atm,Bop1,Cebpz,Dhx9,Frg1,Hsp90aa1,Eif2d,Mybbp1a,Prkdc,Rps17,Ruvbl2,Abce1,Prpf19,Exosc10,Ddx56,Ddx39b,Ddx20,Ftsj3,Gemin2,Xab2,Nvl,Nob1,Trmt112,Brix1,Ebna1bp2,Pin4,Utp20,Nol8,Mtrex,Rrp1b,Dis3,Nol9,Ddx10,Imp3,Rpp25,Xpo1,Taf9,Exosc4,Helb,Dicer1,Urb1,Tbl3,Wdr36,Ddx27,Heatr3,Gnl3l,Atr,Setx,Ltv1,Urb2,Nom1
5_Member	GO Biological Processes	GO:0034660	ncRNA metabolic process	-17.8143	-14.6146	50/448	12181,14300,18033,18130,19090,20068,28114,50912,52513,56095,58523,66757,67005,67010,67417,67459,67619,67674,68276,68626,69072,69713,70650,70683,70930,71701,72198,72462,72662,74035,77065,77591,78697,94223,101861,102462,102614,109075,117599,192119,207932,213773,224805,225348,226414,228889,240174,328092,328572,636931	Bop1,Frg1,Nfkb1,Ints6,Prkdc,Rps17,Nsun2,Exosc10,Ddx56,Ftsj3,Elp2,Adat2,Polr3k,Rbm7,Ears2,Nvl,Nob1,Trmt112,Toe1,Elac2,Ebna1bp2,Pin4,Zcchc8,Utp20,Nol8,Pnpt1,Mtrex,Rrp1b,Dis3,Nol9,Ints7,Ddx10,Pus7,Dgcr8,Ints4,Imp3,Rpp25,Exosc4,Helb,Dicer1,Urb1,Tbl3,Aars2,Wdr36,Dars,Ddx27,Thada,Dtd2,Ep300,Trim71
5_Member	GO Biological Processes	GO:0034470	ncRNA processing	-15.9255	-12.8762	42/355	12181,14300,18130,19090,20068,28114,50912,52513,56095,58523,66757,67005,67459,67619,67674,68276,68626,69072,69713,70650,70683,70930,72198,72462,72662,74035,77065,77591,78697,94223,101861,102462,102614,109075,117599,192119,207932,213773,224805,225348,228889,240174	Bop1,Frg1,Ints6,Prkdc,Rps17,Nsun2,Exosc10,Ddx56,Ftsj3,Elp2,Adat2,Polr3k,Nvl,Nob1,Trmt112,Toe1,Elac2,Ebna1bp2,Pin4,Zcchc8,Utp20,Nol8,Mtrex,Rrp1b,Dis3,Nol9,Ints7,Ddx10,Pus7,Dgcr8,Ints4,Imp3,Rpp25,Exosc4,Helb,Dicer1,Urb1,Tbl3,Aars2,Wdr36,Ddx27,Thada
5_Member	GO Biological Processes	GO:0042254	ribosome biogenesis	-15.7261	-12.7137	38/294	11837,12181,12607,14300,18432,19090,20068,24015,50912,52513,56095,67459,67619,67674,67832,69072,69713,70683,70930,72198,72462,72662,74035,77591,102462,102614,103573,109075,117599,207932,213773,225348,228889,234549,237107,353258,382038,433864	Rplp0,Bop1,Cebpz,Frg1,Mybbp1a,Prkdc,Rps17,Abce1,Exosc10,Ddx56,Ftsj3,Nvl,Nob1,Trmt112,Brix1,Ebna1bp2,Pin4,Utp20,Nol8,Mtrex,Rrp1b,Dis3,Nol9,Ddx10,Imp3,Rpp25,Xpo1,Exosc4,Helb,Urb1,Tbl3,Wdr36,Ddx27,Heatr3,Gnl3l,Ltv1,Urb2,Nom1
5_Member	GO Biological Processes	GO:0016072	rRNA metabolic process	-11.7571	-9.20738	28/216	12181,14300,19090,20068,50912,52513,56095,67459,67619,67674,69072,69713,70683,70930,72198,72462,72662,74035,77591,102462,102614,109075,117599,192119,207932,213773,225348,228889	Bop1,Frg1,Prkdc,Rps17,Exosc10,Ddx56,Ftsj3,Nvl,Nob1,Trmt112,Ebna1bp2,Pin4,Utp20,Nol8,Mtrex,Rrp1b,Dis3,Nol9,Ddx10,Imp3,Rpp25,Exosc4,Helb,Dicer1,Urb1,Tbl3,Wdr36,Ddx27
5_Member	GO Biological Processes	GO:0006364	rRNA processing	-11.4223	-8.90983	27/207	12181,14300,19090,20068,50912,52513,56095,67459,67619,67674,69072,69713,70683,70930,72198,72462,72662,74035,77591,102462,102614,109075,117599,207932,213773,225348,228889	Bop1,Frg1,Prkdc,Rps17,Exosc10,Ddx56,Ftsj3,Nvl,Nob1,Trmt112,Ebna1bp2,Pin4,Utp20,Nol8,Mtrex,Rrp1b,Dis3,Nol9,Ddx10,Imp3,Rpp25,Exosc4,Helb,Urb1,Tbl3,Wdr36,Ddx27
5_Member	Reactome Gene Sets	R-MMU-6791226	Major pathway of rRNA processing in the nucleolus and cytosol	-8.48937	-6.25657	21/172	11837,12181,20068,27370,50912,56095,66249,66475,67619,69072,72198,72662,74035,78294,80886,102462,102614,109075,213773,225348,353258	Rplp0,Bop1,Rps17,Rps26,Exosc10,Ftsj3,Pno1,Rps23,Nob1,Ebna1bp2,Mtrex,Dis3,Nol9,Rps27a,Senp3,Imp3,Rpp25,Exosc4,Tbl3,Wdr36,Ltv1
5_Member	Reactome Gene Sets	R-MMU-72312	rRNA processing	-8.48937	-6.25657	21/172	11837,12181,20068,27370,50912,56095,66249,66475,67619,69072,72198,72662,74035,78294,80886,102462,102614,109075,213773,225348,353258	Rplp0,Bop1,Rps17,Rps26,Exosc10,Ftsj3,Pno1,Rps23,Nob1,Ebna1bp2,Mtrex,Dis3,Nol9,Rps27a,Senp3,Imp3,Rpp25,Exosc4,Tbl3,Wdr36,Ltv1
5_Member	Reactome Gene Sets	R-MMU-8868773	rRNA processing in the nucleus and cytosol	-8.48937	-6.25657	21/172	11837,12181,20068,27370,50912,56095,66249,66475,67619,69072,72198,72662,74035,78294,80886,102462,102614,109075,213773,225348,353258	Rplp0,Bop1,Rps17,Rps26,Exosc10,Ftsj3,Pno1,Rps23,Nob1,Ebna1bp2,Mtrex,Dis3,Nol9,Rps27a,Senp3,Imp3,Rpp25,Exosc4,Tbl3,Wdr36,Ltv1
6_Summary	GO Molecular Functions	GO:0003682	chromatin binding	-18.6918	-15.3952	62/646	12534,13006,13017,13211,13990,14211,14390,15161,15201,16468,17350,17685,17688,17979,18033,18193,18392,18968,18973,19664,20019,20174,20185,20924,20926,21849,24116,50878,51810,52609,52615,54387,57753,60595,66197,67486,68275,71514,71735,73703,76804,77011,83797,93759,93760,99982,100683,104248,104263,107951,116871,192197,210711,215387,218210,218832,218850,226182,231329,233904,243272,328572,13194,16647…	Cdk1,Smc3,Ctbp2,Dhx9,Smarcad1,Smc2,Gabpa,Hcfc1,Hells,Jarid2,Mlh1,Msh2,Msh6,Ncoa3,Nfkb1,Nsd1,Orc1,Pola1,Pole,Rbpj,Polr1a,Ruvbl2,Ncor1,Supt5,Supt6,Trim28,Nelfa,Stag3,Hnrnpu,Cbx7,Suz12,Mcm3ap,Noc3l,Actn4,Cks2,Polr3g,Rpa1,Sfpq,Lrwd1,Dppa2,Kdm4c,Ticrr,Smarcd1,Sirt1,Arid1a,Kdm1a,Trrap,Cabin1,Kdm3a,Cdk9,Mta3,Bcas3,Mcmbp,Ncaph,Nup153,Polr3a,Tasor,Taf5,Polr2b,Setd1a,Sbno1,Ep300,Ddb1,Kpna2,Mybl2,Pml,Kdm5c,…
6_Member	GO Molecular Functions	GO:0003682	chromatin binding	-18.6918	-15.3952	62/646	12534,13006,13017,13211,13990,14211,14390,15161,15201,16468,17350,17685,17688,17979,18033,18193,18392,18968,18973,19664,20019,20174,20185,20924,20926,21849,24116,50878,51810,52609,52615,54387,57753,60595,66197,67486,68275,71514,71735,73703,76804,77011,83797,93759,93760,99982,100683,104248,104263,107951,116871,192197,210711,215387,218210,218832,218850,226182,231329,233904,243272,328572	Cdk1,Smc3,Ctbp2,Dhx9,Smarcad1,Smc2,Gabpa,Hcfc1,Hells,Jarid2,Mlh1,Msh2,Msh6,Ncoa3,Nfkb1,Nsd1,Orc1,Pola1,Pole,Rbpj,Polr1a,Ruvbl2,Ncor1,Supt5,Supt6,Trim28,Nelfa,Stag3,Hnrnpu,Cbx7,Suz12,Mcm3ap,Noc3l,Actn4,Cks2,Polr3g,Rpa1,Sfpq,Lrwd1,Dppa2,Kdm4c,Ticrr,Smarcd1,Sirt1,Arid1a,Kdm1a,Trrap,Cabin1,Kdm3a,Cdk9,Mta3,Bcas3,Mcmbp,Ncaph,Nup153,Polr3a,Tasor,Taf5,Polr2b,Setd1a,Sbno1,Ep300
6_Member	WikiPathways	WP1763	PluriNetWork: mechanisms associated with pluripotency	-12.777	-10.1172	34/292	13017,13194,13211,13990,15161,15201,16468,16647,17865,18033,18854,19664,20591,20683,21849,22286,23988,51810,51869,52463,52615,54427,57258,69890,76804,99982,104248,104263,104383,107932,234366,252870,328572,332221	Ctbp2,Ddb1,Dhx9,Smarcad1,Hcfc1,Hells,Jarid2,Kpna2,Mybl2,Nfkb1,Pml,Rbpj,Kdm5c,Sp1,Trim28,Utf1,Pin1,Hnrnpu,Rif1,Tet1,Suz12,Dnmt3l,Xpo4,Zfp219,Kdm4c,Kdm1a,Cabin1,Kdm3a,Rcor2,Chd4,Gatad2a,Usp7,Ep300,Zscan10
6_Member	GO Molecular Functions	GO:0008134	transcription factor binding	-9.15976	-6.82137	48/704	12704,13017,13211,14390,14897,15161,15481,15502,15507,16468,16647,17979,18033,18193,18432,19090,19184,19255,19664,20174,20185,20591,20683,50995,51810,52615,53380,53975,57320,60595,71702,76804,93759,93760,98758,99982,104263,107932,107951,108000,108143,116871,192197,233904,234594,252870,321006,328572	Cit,Ctbp2,Dhx9,Gabpa,Trip12,Hcfc1,Hspa8,Dnaja1,Hspb1,Jarid2,Kpna2,Ncoa3,Nfkb1,Nsd1,Mybbp1a,Prkdc,Psmc5,Ptpn2,Rbpj,Ruvbl2,Ncor1,Kdm5c,Sp1,Uba2,Hnrnpu,Suz12,Psmd10,Ddx20,Park7,Actn4,Cdc5l,Kdm4c,Sirt1,Arid1a,Hnrnpf,Kdm1a,Kdm3a,Chd4,Cdk9,Cenpf,Taf9,Mta3,Bcas3,Setd1a,Cnot1,Usp7,Dcaf1,Ep300
7_Summary	KEGG Pathway	ko00240	Pyrimidine metabolism	-16.1206	-13.0001	24/102	18968,18972,18973,20016,20017,20018,20019,20135,21915,22171,22247,50493,56749,66136,66420,66422,66491,67005,67486,69920,71701,218832,231329,320685,11834,13211,17749,28114,50912,53817,53975,56095,67417,67619,67674,68276,68278,68626,68925,72047,72162,72198,72662,102614,192119,192170,212442,224805,226414,234594,328092,11920,12572,13194,16647,17350,17420,17685,17686,17688,19090,20892,21399,21749,2185…	Pola1,Pold2,Pole,Polr1c,Polr1b,Polr1d,Polr1a,Rrm2,Dtymk,Tyms,Umps,Txnrd1,Dhodh,Polr1h,Polr2e,Dctpp1,Polr2l,Polr3k,Polr3g,Polr2i,Pnpt1,Polr3a,Polr2b,Dctd,Aqr,Dhx9,Polr2k,Nsun2,Exosc10,Ddx39b,Ddx20,Ftsj3,Ears2,Nob1,Trmt112,Toe1,Ddx39a,Elac2,Rpap1,Ddx42,Dhx36,Mtrex,Dis3,Rpp25,Dicer1,Eif4a3,Lactb2,Aars2,Dars,Cnot1,Dtd2,Atm,Cdk7,Ddb1,Kpna2,Mlh1,Mnat1,Msh2,Msh3,Msh6,Prkdc,Cenpx,Tcea1,Terf1,Timeless,Usp…
7_Member	KEGG Pathway	ko00240	Pyrimidine metabolism	-16.1206	-13.0001	24/102	18968,18972,18973,20016,20017,20018,20019,20135,21915,22171,22247,50493,56749,66136,66420,66422,66491,67005,67486,69920,71701,218832,231329,320685	Pola1,Pold2,Pole,Polr1c,Polr1b,Polr1d,Polr1a,Rrm2,Dtymk,Tyms,Umps,Txnrd1,Dhodh,Polr1h,Polr2e,Dctpp1,Polr2l,Polr3k,Polr3g,Polr2i,Pnpt1,Polr3a,Polr2b,Dctd
7_Member	KEGG Pathway	mmu00240	Pyrimidine metabolism	-15.7085	-12.7137	24/106	18968,18972,18973,20016,20017,20018,20019,20135,21915,22171,22247,50493,56749,66136,66420,66422,66491,67005,67486,69920,71701,218832,231329,320685	Pola1,Pold2,Pole,Polr1c,Polr1b,Polr1d,Polr1a,Rrm2,Dtymk,Tyms,Umps,Txnrd1,Dhodh,Polr1h,Polr2e,Dctpp1,Polr2l,Polr3k,Polr3g,Polr2i,Pnpt1,Polr3a,Polr2b,Dctd
7_Member	GO Molecular Functions	GO:0140098	catalytic activity, acting on RNA	-15.1022	-12.1735	40/340	11834,13211,17749,20016,20017,20018,20019,28114,50912,53817,53975,56095,66136,66420,66491,67005,67417,67486,67619,67674,68276,68278,68626,68925,69920,71701,72047,72162,72198,72662,102614,192119,192170,212442,218832,224805,226414,231329,234594,328092	Aqr,Dhx9,Polr2k,Polr1c,Polr1b,Polr1d,Polr1a,Nsun2,Exosc10,Ddx39b,Ddx20,Ftsj3,Polr1h,Polr2e,Polr2l,Polr3k,Ears2,Polr3g,Nob1,Trmt112,Toe1,Ddx39a,Elac2,Rpap1,Polr2i,Pnpt1,Ddx42,Dhx36,Mtrex,Dis3,Rpp25,Dicer1,Eif4a3,Lactb2,Polr3a,Aars2,Dars,Polr2b,Cnot1,Dtd2
7_Member	Reactome Gene Sets	R-MMU-73894	DNA Repair	-14.4298	-11.5819	37/305	11834,11920,12572,13194,16647,17350,17420,17685,17686,17688,17749,18972,18973,19090,20892,21399,21749,21853,22224,22256,28000,51869,66420,66491,67439,68058,68275,69920,70620,77605,78294,208836,217069,231329,252870,327762,328572	Aqr,Atm,Cdk7,Ddb1,Kpna2,Mlh1,Mnat1,Msh2,Msh3,Msh6,Polr2k,Pold2,Pole,Prkdc,Cenpx,Tcea1,Terf1,Timeless,Usp10,Ung,Prpf19,Rif1,Polr2e,Polr2l,Xab2,Chd1l,Rpa1,Polr2i,Ube2v2,H2az2,Rps27a,Fanci,Trim25,Polr2b,Usp7,Dna2,Ep300
7_Member	Reactome Gene Sets	R-MMU-6782210	Gap-filling DNA repair synthesis and ligation in TC-NER	-14.261	-11.4292	18/60	11834,12572,13194,17420,17749,18972,18973,21399,28000,66420,66491,67439,68275,69920,78294,231329,252870,328572	Aqr,Cdk7,Ddb1,Mnat1,Polr2k,Pold2,Pole,Tcea1,Prpf19,Polr2e,Polr2l,Xab2,Rpa1,Polr2i,Rps27a,Polr2b,Usp7,Ep300
7_Member	Reactome Gene Sets	R-MMU-6782135	Dual incision in TC-NER	-14.1194	-11.3118	18/61	11834,12572,13194,17420,17749,18972,18973,21399,28000,66420,66491,67439,68275,69920,78294,231329,252870,328572	Aqr,Cdk7,Ddb1,Mnat1,Polr2k,Pold2,Pole,Tcea1,Prpf19,Polr2e,Polr2l,Xab2,Rpa1,Polr2i,Rps27a,Polr2b,Usp7,Ep300
7_Member	GO Molecular Functions	GO:0003899	DNA-directed 5'-3' RNA polymerase activity	-13.0186	-10.333	14/36	17749,20016,20017,20018,20019,66136,66420,66491,67005,67486,68925,69920,218832,231329	Polr2k,Polr1c,Polr1b,Polr1d,Polr1a,Polr1h,Polr2e,Polr2l,Polr3k,Polr3g,Rpap1,Polr2i,Polr3a,Polr2b
7_Member	Reactome Gene Sets	R-MMU-6781827	Transcription-Coupled Nucleotide Excision Repair (TC-NER)	-12.8477	-10.1708	18/71	11834,12572,13194,17420,17749,18972,18973,21399,28000,66420,66491,67439,68275,69920,78294,231329,252870,328572	Aqr,Cdk7,Ddb1,Mnat1,Polr2k,Pold2,Pole,Tcea1,Prpf19,Polr2e,Polr2l,Xab2,Rpa1,Polr2i,Rps27a,Polr2b,Usp7,Ep300
7_Member	GO Molecular Functions	GO:0034062	5'-3' RNA polymerase activity	-12.633	-9.98955	14/38	17749,20016,20017,20018,20019,66136,66420,66491,67005,67486,68925,69920,218832,231329	Polr2k,Polr1c,Polr1b,Polr1d,Polr1a,Polr1h,Polr2e,Polr2l,Polr3k,Polr3g,Rpap1,Polr2i,Polr3a,Polr2b
7_Member	GO Molecular Functions	GO:0097747	RNA polymerase activity	-12.633	-9.98955	14/38	17749,20016,20017,20018,20019,66136,66420,66491,67005,67486,68925,69920,218832,231329	Polr2k,Polr1c,Polr1b,Polr1d,Polr1a,Polr1h,Polr2e,Polr2l,Polr3k,Polr3g,Rpap1,Polr2i,Polr3a,Polr2b
7_Member	Reactome Gene Sets	R-MMU-5696398	Nucleotide Excision Repair	-12.1055	-9.49312	20/100	11834,12572,13194,17420,17749,18972,18973,21399,28000,66420,66491,67439,68058,68275,69920,70620,78294,231329,252870,328572	Aqr,Cdk7,Ddb1,Mnat1,Polr2k,Pold2,Pole,Tcea1,Prpf19,Polr2e,Polr2l,Xab2,Chd1l,Rpa1,Polr2i,Ube2v2,Rps27a,Polr2b,Usp7,Ep300
7_Member	KEGG Pathway	ko03020	RNA polymerase	-11.8464	-9.28597	12/28	20016,20017,20018,20019,66136,66420,66491,67005,67486,69920,218832,231329	Polr1c,Polr1b,Polr1d,Polr1a,Polr1h,Polr2e,Polr2l,Polr3k,Polr3g,Polr2i,Polr3a,Polr2b
7_Member	KEGG Pathway	mmu03020	RNA polymerase	-11.8464	-9.28597	12/28	20016,20017,20018,20019,66136,66420,66491,67005,67486,69920,218832,231329	Polr1c,Polr1b,Polr1d,Polr1a,Polr1h,Polr2e,Polr2l,Polr3k,Polr3g,Polr2i,Polr3a,Polr2b
7_Member	Reactome Gene Sets	R-MMU-6781823	Formation of TC-NER Pre-Incision Complex	-11.8422	-9.28597	15/51	11834,12572,13194,17420,17749,21399,28000,66420,66491,67439,69920,78294,231329,252870,328572	Aqr,Cdk7,Ddb1,Mnat1,Polr2k,Tcea1,Prpf19,Polr2e,Polr2l,Xab2,Polr2i,Rps27a,Polr2b,Usp7,Ep300
7_Member	GO Molecular Functions	GO:0016779	nucleotidyltransferase activity	-10.933	-8.45478	21/128	17749,18789,18968,18972,18973,20016,20017,20018,20019,21749,66136,66420,66491,67005,67486,68925,69920,71701,218832,230734,231329	Polr2k,Papola,Pola1,Pold2,Pole,Polr1c,Polr1b,Polr1d,Polr1a,Terf1,Polr1h,Polr2e,Polr2l,Polr3k,Polr3g,Rpap1,Polr2i,Pnpt1,Polr3a,Yrdc,Polr2b
7_Member	WikiPathways	WP567	Eukaryotic Transcription Initiation	-10.8087	-8.33596	13/41	12572,17420,17749,20016,20017,20018,20019,66420,67005,69920,108143,226182,231329	Cdk7,Mnat1,Polr2k,Polr1c,Polr1b,Polr1d,Polr1a,Polr2e,Polr3k,Polr2i,Taf9,Taf5,Polr2b
7_Member	Reactome Gene Sets	R-MMU-6807505	RNA polymerase II transcribes snRNA genes	-9.5886	-7.19051	15/71	12572,17749,18130,20683,20924,66420,66491,68991,69920,77065,101861,107951,108143,226182,231329	Cdk7,Polr2k,Ints6,Sp1,Supt5,Polr2e,Polr2l,Ssu72,Polr2i,Ints7,Ints4,Cdk9,Taf9,Taf5,Polr2b
7_Member	Reactome Gene Sets	R-MMU-73762	RNA Polymerase I Transcription Initiation	-9.42736	-7.04325	12/42	12572,17420,17749,20016,20017,20019,66136,66420,66491,107932,116871,234366	Cdk7,Mnat1,Polr2k,Polr1c,Polr1b,Polr1a,Polr1h,Polr2e,Polr2l,Chd4,Mta3,Gatad2a
7_Member	Reactome Gene Sets	R-MMU-674695	RNA Polymerase II Pre-transcription Events	-9.14744	-6.81302	15/76	12572,17420,17749,20924,20926,21399,24116,66420,66491,69920,73473,107951,108143,226182,231329	Cdk7,Mnat1,Polr2k,Supt5,Supt6,Tcea1,Nelfa,Polr2e,Polr2l,Polr2i,Iws1,Cdk9,Taf9,Taf5,Polr2b
7_Member	Reactome Gene Sets	R-MMU-112382	Formation of RNA Pol II elongation complex	-9.03491	-6.71218	13/55	12572,17420,17749,20924,20926,21399,24116,66420,66491,69920,73473,107951,231329	Cdk7,Mnat1,Polr2k,Supt5,Supt6,Tcea1,Nelfa,Polr2e,Polr2l,Polr2i,Iws1,Cdk9,Polr2b
7_Member	Reactome Gene Sets	R-MMU-75955	RNA Polymerase II Transcription Elongation	-9.03491	-6.71218	13/55	12572,17420,17749,20924,20926,21399,24116,66420,66491,69920,73473,107951,231329	Cdk7,Mnat1,Polr2k,Supt5,Supt6,Tcea1,Nelfa,Polr2e,Polr2l,Polr2i,Iws1,Cdk9,Polr2b
7_Member	Reactome Gene Sets	R-MMU-6796648	TP53 Regulates Transcription of DNA Repair Genes	-8.24613	-6.02868	11/42	12572,17420,17749,20924,21399,24116,66420,66491,69920,107951,231329	Cdk7,Mnat1,Polr2k,Supt5,Tcea1,Nelfa,Polr2e,Polr2l,Polr2i,Cdk9,Polr2b
7_Member	Reactome Gene Sets	R-MMU-73863	RNA Polymerase I Transcription Termination	-7.56231	-5.41949	9/29	12572,17420,17749,20016,20017,20019,66136,66420,66491	Cdk7,Mnat1,Polr2k,Polr1c,Polr1b,Polr1a,Polr1h,Polr2e,Polr2l
7_Member	Reactome Gene Sets	R-MMU-113418	Formation of the Early Elongation Complex	-7.1447	-5.06115	9/32	12572,17420,17749,20924,24116,66420,66491,69920,231329	Cdk7,Mnat1,Polr2k,Supt5,Nelfa,Polr2e,Polr2l,Polr2i,Polr2b
7_Member	WikiPathways	WP2185	Purine metabolism	-7.07317	-4.99622	19/171	18968,18972,18973,20016,20017,20018,20019,20135,23918,66136,66420,66491,67005,67486,69920,71701,108143,218832,231329	Pola1,Pold2,Pole,Polr1c,Polr1b,Polr1d,Polr1a,Rrm2,Impdh2,Polr1h,Polr2e,Polr2l,Polr3k,Polr3g,Polr2i,Pnpt1,Taf9,Polr3a,Polr2b
7_Member	Reactome Gene Sets	R-MMU-77075	RNA Pol II CTD phosphorylation and interaction with CE	-6.74811	-4.70876	8/26	12572,17420,17749,20924,66420,66491,69920,231329	Cdk7,Mnat1,Polr2k,Supt5,Polr2e,Polr2l,Polr2i,Polr2b
7_Member	KEGG Pathway	ko05169	Epstein-Barr virus infection	-6.67976	-4.6444	21/218	12534,15481,15507,17999,18033,19184,19664,20016,20018,66420,66491,66997,67005,67486,69920,103573,218832,231329,234779,252870,328572	Cdk1,Hspa8,Hspb1,Nedd4,Nfkb1,Psmc5,Rbpj,Polr1c,Polr1d,Polr2e,Polr2l,Psmd12,Polr3k,Polr3g,Polr2i,Xpo1,Polr3a,Polr2b,Plcg2,Usp7,Ep300
7_Member	Reactome Gene Sets	R-MMU-72086	mRNA Capping	-6.46893	-4.46969	8/28	12572,17420,17749,20924,66420,66491,69920,231329	Cdk7,Mnat1,Polr2k,Supt5,Polr2e,Polr2l,Polr2i,Polr2b
7_Member	KEGG Pathway	mmu05169	Epstein-Barr virus infection	-6.44947	-4.45206	21/225	12534,15481,15507,17999,18033,19184,19664,20016,20018,66420,66491,66997,67005,67486,69920,103573,218832,231329,234779,252870,328572	Cdk1,Hspa8,Hspb1,Nedd4,Nfkb1,Psmc5,Rbpj,Polr1c,Polr1d,Polr2e,Polr2l,Psmd12,Polr3k,Polr3g,Polr2i,Xpo1,Polr3a,Polr2b,Plcg2,Usp7,Ep300
7_Member	WikiPathways	WP1244	Estrogen signaling	-6.38653	-4.39454	12/75	12572,17420,17749,18033,20185,20683,66420,69920,108143,226182,231329,328572	Cdk7,Mnat1,Polr2k,Nfkb1,Ncor1,Sp1,Polr2e,Polr2i,Taf9,Taf5,Polr2b,Ep300
7_Member	KEGG Pathway	ko00230	Purine metabolism	-6.19345	-4.23759	18/176	18968,18972,18973,20016,20017,20018,20019,20135,23918,66136,66420,66491,67005,67486,69920,71701,218832,231329	Pola1,Pold2,Pole,Polr1c,Polr1b,Polr1d,Polr1a,Rrm2,Impdh2,Polr1h,Polr2e,Polr2l,Polr3k,Polr3g,Polr2i,Pnpt1,Polr3a,Polr2b
7_Member	KEGG Pathway	mmu00230	Purine metabolism	-6.04966	-4.11476	18/180	18968,18972,18973,20016,20017,20018,20019,20135,23918,66136,66420,66491,67005,67486,69920,71701,218832,231329	Pola1,Pold2,Pole,Polr1c,Polr1b,Polr1d,Polr1a,Rrm2,Impdh2,Polr1h,Polr2e,Polr2l,Polr3k,Polr3g,Polr2i,Pnpt1,Polr3a,Polr2b
7_Member	Reactome Gene Sets	R-MMU-73776	RNA Polymerase II Promoter Escape	-5.86045	-3.95739	9/44	12572,17420,17749,66420,66491,69920,108143,226182,231329	Cdk7,Mnat1,Polr2k,Polr2e,Polr2l,Polr2i,Taf9,Taf5,Polr2b
7_Member	Reactome Gene Sets	R-MMU-73779	RNA Polymerase II Transcription Pre-Initiation And Promoter Opening	-5.86045	-3.95739	9/44	12572,17420,17749,66420,66491,69920,108143,226182,231329	Cdk7,Mnat1,Polr2k,Polr2e,Polr2l,Polr2i,Taf9,Taf5,Polr2b
7_Member	Reactome Gene Sets	R-MMU-75953	RNA Polymerase II Transcription Initiation	-5.86045	-3.95739	9/44	12572,17420,17749,66420,66491,69920,108143,226182,231329	Cdk7,Mnat1,Polr2k,Polr2e,Polr2l,Polr2i,Taf9,Taf5,Polr2b
7_Member	Reactome Gene Sets	R-MMU-76042	RNA Polymerase II Transcription Initiation And Promoter Clearance	-5.86045	-3.95739	9/44	12572,17420,17749,66420,66491,69920,108143,226182,231329	Cdk7,Mnat1,Polr2k,Polr2e,Polr2l,Polr2i,Taf9,Taf5,Polr2b
7_Member	Reactome Gene Sets	R-MMU-76066	RNA Polymerase III Transcription Initiation From Type 2 Promoter	-5.65891	-3.78054	7/25	17749,20016,66420,66491,67005,67486,218832	Polr2k,Polr1c,Polr2e,Polr2l,Polr3k,Polr3g,Polr3a
7_Member	Reactome Gene Sets	R-MMU-76061	RNA Polymerase III Transcription Initiation From Type 1 Promoter	-5.53232	-3.6737	7/26	17749,20016,66420,66491,67005,67486,218832	Polr2k,Polr1c,Polr2e,Polr2l,Polr3k,Polr3g,Polr3a
7_Member	Reactome Gene Sets	R-MMU-76071	RNA Polymerase III Transcription Initiation From Type 3 Promoter	-5.53232	-3.6737	7/26	17749,20016,66420,66491,67005,67486,218832	Polr2k,Polr1c,Polr2e,Polr2l,Polr3k,Polr3g,Polr3a
7_Member	Reactome Gene Sets	R-MMU-73854	RNA Polymerase I Promoter Clearance	-5.28484	-3.45185	13/111	12572,17420,17749,20016,20017,20019,66136,66420,66491,77605,107932,116871,234366	Cdk7,Mnat1,Polr2k,Polr1c,Polr1b,Polr1a,Polr1h,Polr2e,Polr2l,H2az2,Chd4,Mta3,Gatad2a
7_Member	Reactome Gene Sets	R-MMU-73864	RNA Polymerase I Transcription	-5.24132	-3.41206	13/112	12572,17420,17749,20016,20017,20019,66136,66420,66491,77605,107932,116871,234366	Cdk7,Mnat1,Polr2k,Polr1c,Polr1b,Polr1a,Polr1h,Polr2e,Polr2l,H2az2,Chd4,Mta3,Gatad2a
7_Member	Reactome Gene Sets	R-MMU-212165	Epigenetic regulation of gene expression	-5.1558	-3.33509	13/114	16468,17749,18432,20016,20017,20019,52615,66136,66420,66491,77605,93759,328572	Jarid2,Polr2k,Mybbp1a,Polr1c,Polr1b,Polr1a,Suz12,Polr1h,Polr2e,Polr2l,H2az2,Sirt1,Ep300
7_Member	Reactome Gene Sets	R-MMU-74158	RNA Polymerase III Transcription	-4.78707	-3.01156	7/33	17749,20016,66420,66491,67005,67486,218832	Polr2k,Polr1c,Polr2e,Polr2l,Polr3k,Polr3g,Polr3a
7_Member	Reactome Gene Sets	R-MMU-76046	RNA Polymerase III Transcription Initiation	-4.78707	-3.01156	7/33	17749,20016,66420,66491,67005,67486,218832	Polr2k,Polr1c,Polr2e,Polr2l,Polr3k,Polr3g,Polr3a
7_Member	KEGG Pathway	ko04623	Cytosolic DNA-sensing pathway	-4.63919	-2.89074	9/61	18033,20016,20018,66420,66491,66824,67005,67486,218832	Nfkb1,Polr1c,Polr1d,Polr2e,Polr2l,Pycard,Polr3k,Polr3g,Polr3a
7_Member	KEGG Pathway	mmu04623	Cytosolic DNA-sensing pathway	-4.63919	-2.89074	9/61	18033,20016,20018,66420,66491,66824,67005,67486,218832	Nfkb1,Polr1c,Polr1d,Polr2e,Polr2l,Pycard,Polr3k,Polr3g,Polr3a
7_Member	Reactome Gene Sets	R-MMU-6803529	FGFR2 alternative splicing	-4.61063	-2.86423	6/24	17749,66420,66491,69920,98758,231329	Polr2k,Polr2e,Polr2l,Polr2i,Hnrnpf,Polr2b
7_Member	Reactome Gene Sets	R-MMU-73772	RNA Polymerase I Promoter Escape	-3.80507	-2.1712	10/95	12572,17420,17749,20016,20017,20019,66136,66420,66491,77605	Cdk7,Mnat1,Polr2k,Polr1c,Polr1b,Polr1a,Polr1h,Polr2e,Polr2l,H2az2
7_Member	Reactome Gene Sets	R-MMU-5250913	Positive epigenetic regulation of rRNA expression	-3.76715	-2.14185	10/96	17749,18432,20016,20017,20019,66136,66420,66491,77605,328572	Polr2k,Mybbp1a,Polr1c,Polr1b,Polr1a,Polr1h,Polr2e,Polr2l,H2az2,Ep300
7_Member	Reactome Gene Sets	R-MMU-5250924	B-WICH complex positively regulates rRNA expression	-3.76715	-2.14185	10/96	17749,18432,20016,20017,20019,66136,66420,66491,77605,328572	Polr2k,Mybbp1a,Polr1c,Polr1b,Polr1a,Polr1h,Polr2e,Polr2l,H2az2,Ep300
7_Member	Reactome Gene Sets	R-MMU-9018519	Estrogen-dependent gene expression	-3.55941	-1.96247	11/121	15519,17749,20683,66420,66491,69920,77605,99982,107951,231329,328572	Hsp90aa1,Polr2k,Sp1,Polr2e,Polr2l,Polr2i,H2az2,Kdm1a,Cdk9,Polr2b,Ep300
7_Member	Reactome Gene Sets	R-MMU-5654738	Signaling by FGFR2	-3.48135	-1.90557	8/68	12402,17749,66420,66491,69920,78294,98758,231329	Cbl,Polr2k,Polr2e,Polr2l,Polr2i,Rps27a,Hnrnpf,Polr2b
7_Member	Reactome Gene Sets	R-MMU-190236	Signaling by FGFR	-3.00357	-1.51199	8/80	12402,17749,66420,66491,69920,78294,98758,231329	Cbl,Polr2k,Polr2e,Polr2l,Polr2i,Rps27a,Hnrnpf,Polr2b
7_Member	Reactome Gene Sets	R-MMU-8939211	ESR-mediated signaling	-2.90668	-1.44147	13/190	15507,15519,17749,20683,66420,66491,69920,77605,99982,103573,107951,231329,328572	Hspb1,Hsp90aa1,Polr2k,Sp1,Polr2e,Polr2l,Polr2i,H2az2,Kdm1a,Xpo1,Cdk9,Polr2b,Ep300
7_Member	Reactome Gene Sets	R-MMU-72165	mRNA Splicing - Minor Pathway	-2.87578	-1.41432	6/48	17749,66420,66491,69920,72047,231329	Polr2k,Polr2e,Polr2l,Polr2i,Ddx42,Polr2b
7_Member	Reactome Gene Sets	R-MMU-5578749	Transcriptional regulation by small RNAs	-2.66238	-1.2413	9/111	17749,18141,19386,66420,66491,69920,77605,218210,231329	Polr2k,Nup50,Ranbp2,Polr2e,Polr2l,Polr2i,H2az2,Nup153,Polr2b
7_Member	Reactome Gene Sets	R-MMU-211000	Gene Silencing by RNA	-2.45778	-1.0738	9/119	17749,18141,19386,66420,66491,69920,77605,218210,231329	Polr2k,Nup50,Ranbp2,Polr2e,Polr2l,Polr2i,H2az2,Nup153,Polr2b
7_Member	Reactome Gene Sets	R-MMU-9006931	Signaling by Nuclear Receptors	-2.4575	-1.0738	14/239	15507,15519,17749,20683,66420,66491,69920,77605,99982,103573,107951,228026,231329,328572	Hspb1,Hsp90aa1,Polr2k,Sp1,Polr2e,Polr2l,Polr2i,H2az2,Kdm1a,Xpo1,Cdk9,Pdk1,Polr2b,Ep300
8_Summary	GO Biological Processes	GO:0006260	DNA replication	-14.6335	-11.7422	34/253	12534,13006,13211,17215,17216,17217,17219,17220,17686,18392,18968,18972,18973,19891,20135,20892,21749,21853,22687,26429,57753,67444,68275,69270,71735,77011,107951,109145,117599,210711,212377,218914,245000,327762,12572,17420,19184,53380,54124,66997,68612,77891,78294,216080,12785,14211,17350,17685,18521,19360,21681,51810,72162,320267,20017,11920,12236,12237,18817,19090,56150,268697,328572,20174,680…	Cdk1,Smc3,Dhx9,Mcm3,Mcm2,Mcm4,Mcm6,Mcm7,Msh3,Orc1,Pola1,Pold2,Pole,Rpa2,Rrm2,Cenpx,Terf1,Timeless,Zpr1,Orc5,Noc3l,Ilkap,Rpa1,Gins1,Lrwd1,Ticrr,Cdk9,Gins4,Helb,Mcmbp,Mms22l,Wapl,Atr,Dna2,Cdk7,Mnat1,Psmc5,Psmd10,Cks1b,Psmd12,Ube2c,Ube2s,Rps27a,Ube2d1,Cnbp,Smc2,Mlh1,Msh2,Pcbp2,Rad50,Alyref,Hnrnpu,Dhx36,Fubp3,Polr1b,Atm,Bub1b,Bub3,Plk1,Prkdc,Mad2l1,Ccnb1,Ep300,Ruvbl2,Chd1l,Gtse1,Ube2v2,Top3b,Ung,Dice…
8_Member	GO Biological Processes	GO:0006260	DNA replication	-14.6335	-11.7422	34/253	12534,13006,13211,17215,17216,17217,17219,17220,17686,18392,18968,18972,18973,19891,20135,20892,21749,21853,22687,26429,57753,67444,68275,69270,71735,77011,107951,109145,117599,210711,212377,218914,245000,327762	Cdk1,Smc3,Dhx9,Mcm3,Mcm2,Mcm4,Mcm6,Mcm7,Msh3,Orc1,Pola1,Pold2,Pole,Rpa2,Rrm2,Cenpx,Terf1,Timeless,Zpr1,Orc5,Noc3l,Ilkap,Rpa1,Gins1,Lrwd1,Ticrr,Cdk9,Gins4,Helb,Mcmbp,Mms22l,Wapl,Atr,Dna2
8_Member	Reactome Gene Sets	R-MMU-69242	S Phase	-14.5024	-11.6318	26/143	12572,13006,17215,17216,17217,17219,17220,17420,18392,18968,18972,18973,19184,26429,53380,54124,66997,68275,68612,69270,77891,78294,109145,216080,218914,327762	Cdk7,Smc3,Mcm3,Mcm2,Mcm4,Mcm6,Mcm7,Mnat1,Orc1,Pola1,Pold2,Pole,Psmc5,Orc5,Psmd10,Cks1b,Psmd12,Rpa1,Ube2c,Gins1,Ube2s,Rps27a,Gins4,Ube2d1,Wapl,Dna2
8_Member	GO Biological Processes	GO:0006261	DNA-dependent DNA replication	-14.4262	-11.5819	26/144	17215,17216,17217,17219,17220,17686,18392,18968,18972,18973,20892,21853,22687,26429,57753,67444,68275,69270,77011,107951,109145,117599,210711,212377,245000,327762	Mcm3,Mcm2,Mcm4,Mcm6,Mcm7,Msh3,Orc1,Pola1,Pold2,Pole,Cenpx,Timeless,Zpr1,Orc5,Noc3l,Ilkap,Rpa1,Gins1,Ticrr,Cdk9,Gins4,Helb,Mcmbp,Mms22l,Atr,Dna2
8_Member	GO Molecular Functions	GO:0003697	single-stranded DNA binding	-11.867	-9.2905	21/115	12785,13211,14211,17215,17216,17217,17219,17220,17350,17685,17686,18521,18968,19360,19891,21681,21749,51810,68275,72162,320267	Cnbp,Dhx9,Smc2,Mcm3,Mcm2,Mcm4,Mcm6,Mcm7,Mlh1,Msh2,Msh3,Pcbp2,Pola1,Rad50,Rpa2,Alyref,Terf1,Hnrnpu,Rpa1,Dhx36,Fubp3
8_Member	Reactome Gene Sets	R-MMU-69239	Synthesis of DNA	-11.867	-9.2905	21/115	17215,17216,17217,17219,17220,18392,18968,18972,18973,19184,26429,53380,66997,68275,68612,69270,77891,78294,109145,216080,327762	Mcm3,Mcm2,Mcm4,Mcm6,Mcm7,Orc1,Pola1,Pold2,Pole,Psmc5,Orc5,Psmd10,Psmd12,Rpa1,Ube2c,Gins1,Ube2s,Rps27a,Gins4,Ube2d1,Dna2
8_Member	Reactome Gene Sets	R-MMU-69306	DNA Replication	-11.2775	-8.78251	21/123	17215,17216,17217,17219,17220,18392,18968,18972,18973,19184,26429,53380,66997,68275,68612,69270,77891,78294,109145,216080,327762	Mcm3,Mcm2,Mcm4,Mcm6,Mcm7,Orc1,Pola1,Pold2,Pole,Psmc5,Orc5,Psmd10,Psmd12,Rpa1,Ube2c,Gins1,Ube2s,Rps27a,Gins4,Ube2d1,Dna2
8_Member	KEGG Pathway	mmu03030	DNA replication	-10.1528	-7.72147	12/37	17215,17216,17217,17219,17220,18968,18972,18973,19891,20017,68275,327762	Mcm3,Mcm2,Mcm4,Mcm6,Mcm7,Pola1,Pold2,Pole,Rpa2,Polr1b,Rpa1,Dna2
8_Member	WikiPathways	WP150	DNA Replication	-9.56339	-7.16985	12/41	17215,17216,17217,17219,17220,18392,18968,18972,18973,19891,26429,68275	Mcm3,Mcm2,Mcm4,Mcm6,Mcm7,Orc1,Pola1,Pold2,Pole,Rpa2,Orc5,Rpa1
8_Member	WikiPathways	WP413	G1 to S cell cycle control	-9.50003	-7.11099	14/61	11920,12534,12572,17215,17216,17217,17219,17220,17420,18392,18973,19891,26429,68275	Atm,Cdk1,Cdk7,Mcm3,Mcm2,Mcm4,Mcm6,Mcm7,Mnat1,Orc1,Pole,Rpa2,Orc5,Rpa1
8_Member	KEGG Pathway	ko04110	Cell cycle	-9.42342	-7.04325	19/124	11920,12236,12237,12534,12572,13006,17215,17216,17217,17219,17220,18392,18817,19090,26429,56150,245000,268697,328572	Atm,Bub1b,Bub3,Cdk1,Cdk7,Smc3,Mcm3,Mcm2,Mcm4,Mcm6,Mcm7,Orc1,Plk1,Prkdc,Orc5,Mad2l1,Atr,Ccnb1,Ep300
8_Member	GO Biological Processes	GO:0006271	DNA strand elongation involved in DNA replication	-9.34679	-6.9753	8/14	17215,17217,17220,18968,18972,18973,69270,327762	Mcm3,Mcm4,Mcm7,Pola1,Pold2,Pole,Gins1,Dna2
8_Member	KEGG Pathway	ko03030	DNA replication	-9.18698	-6.83235	11/35	17215,17216,17217,17219,17220,18968,18972,18973,19891,68275,327762	Mcm3,Mcm2,Mcm4,Mcm6,Mcm7,Pola1,Pold2,Pole,Rpa2,Rpa1,Dna2
8_Member	KEGG Pathway	mmu04110	Cell cycle	-9.18171	-6.83121	19/128	11920,12236,12237,12534,12572,13006,17215,17216,17217,17219,17220,18392,18817,19090,26429,56150,245000,268697,328572	Atm,Bub1b,Bub3,Cdk1,Cdk7,Smc3,Mcm3,Mcm2,Mcm4,Mcm6,Mcm7,Orc1,Plk1,Prkdc,Orc5,Mad2l1,Atr,Ccnb1,Ep300
8_Member	GO Biological Processes	GO:0022616	DNA strand elongation	-9.01554	-6.69663	9/21	17215,17217,17220,18968,18972,18973,19360,69270,327762	Mcm3,Mcm4,Mcm7,Pola1,Pold2,Pole,Rad50,Gins1,Dna2
8_Member	Reactome Gene Sets	R-MMU-69206	G1/S Transition	-8.94278	-6.63143	17/104	12572,17215,17216,17217,17219,17220,17420,18392,18968,18973,19184,26429,53380,54124,66997,68275,78294	Cdk7,Mcm3,Mcm2,Mcm4,Mcm6,Mcm7,Mnat1,Orc1,Pola1,Pole,Psmc5,Orc5,Psmd10,Cks1b,Psmd12,Rpa1,Rps27a
8_Member	GO Molecular Functions	GO:0003688	DNA replication origin binding	-8.79696	-6.50751	9/22	13211,17215,17216,17217,17219,17220,18392,18968,26429	Dhx9,Mcm3,Mcm2,Mcm4,Mcm6,Mcm7,Orc1,Pola1,Orc5
8_Member	Reactome Gene Sets	R-MMU-68962	Activation of the pre-replicative complex	-8.68706	-6.42184	10/30	17215,17216,17217,17219,17220,18392,18968,18973,26429,68275	Mcm3,Mcm2,Mcm4,Mcm6,Mcm7,Orc1,Pola1,Pole,Orc5,Rpa1
8_Member	GO Biological Processes	GO:0006270	DNA replication initiation	-8.08703	-5.88732	10/34	17215,17216,17217,17219,17220,18392,18968,26429,57753,77011	Mcm3,Mcm2,Mcm4,Mcm6,Mcm7,Orc1,Pola1,Orc5,Noc3l,Ticrr
8_Member	Reactome Gene Sets	R-MMU-69002	DNA Replication Pre-Initiation	-7.72366	-5.55197	14/82	17215,17216,17217,17219,17220,18392,18968,18973,19184,26429,53380,66997,68275,78294	Mcm3,Mcm2,Mcm4,Mcm6,Mcm7,Orc1,Pola1,Pole,Psmc5,Orc5,Psmd10,Psmd12,Rpa1,Rps27a
8_Member	Reactome Gene Sets	R-MMU-453279	Mitotic G1 phase and G1/S transition	-7.58892	-5.43842	17/127	12572,17215,17216,17217,17219,17220,17420,18392,18968,18973,19184,26429,53380,54124,66997,68275,78294	Cdk7,Mcm3,Mcm2,Mcm4,Mcm6,Mcm7,Mnat1,Orc1,Pola1,Pole,Psmc5,Orc5,Psmd10,Cks1b,Psmd12,Rpa1,Rps27a
8_Member	CORUM	CORUM:122	MCM complex	-7.20344	-5.10179	5/6	17215,17216,17217,17219,17220	Mcm3,Mcm2,Mcm4,Mcm6,Mcm7
8_Member	Reactome Gene Sets	R-MMU-69052	Switching of origins to a post-replicative state	-7.1909	-5.09385	14/90	17215,17216,17217,17219,17220,18392,19184,26429,53380,66997,68612,77891,78294,216080	Mcm3,Mcm2,Mcm4,Mcm6,Mcm7,Orc1,Psmc5,Orc5,Psmd10,Psmd12,Ube2c,Ube2s,Rps27a,Ube2d1
8_Member	GO Molecular Functions	GO:0003678	DNA helicase activity	-7.01693	-4.94647	11/54	13211,17216,17217,17219,17220,19360,20174,68058,72162,117599,327762	Dhx9,Mcm2,Mcm4,Mcm6,Mcm7,Rad50,Ruvbl2,Chd1l,Dhx36,Helb,Dna2
8_Member	GO Biological Processes	GO:0044786	cell cycle DNA replication	-7.01171	-4.9434	10/43	17215,17216,17217,17219,17220,18968,22687,67444,69270,327762	Mcm3,Mcm2,Mcm4,Mcm6,Mcm7,Pola1,Zpr1,Ilkap,Gins1,Dna2
8_Member	Reactome Gene Sets	R-MMU-69481	G2/M Checkpoints	-6.85714	-4.80562	18/159	11920,12534,17215,17216,17217,17219,17220,18392,19184,26429,29870,53380,66997,68275,70620,78294,268697,327762	Atm,Cdk1,Mcm3,Mcm2,Mcm4,Mcm6,Mcm7,Orc1,Psmc5,Orc5,Gtse1,Psmd10,Psmd12,Rpa1,Ube2v2,Rps27a,Ccnb1,Dna2
8_Member	GO Biological Processes	GO:0000727	double-strand break repair via break-induced replication	-6.66052	-4.63301	6/12	17215,17216,17217,17219,17220,109145	Mcm3,Mcm2,Mcm4,Mcm6,Mcm7,Gins4
8_Member	GO Biological Processes	GO:0033260	nuclear DNA replication	-6.43965	-4.44405	9/38	17215,17216,17217,17219,17220,18968,67444,69270,327762	Mcm3,Mcm2,Mcm4,Mcm6,Mcm7,Pola1,Ilkap,Gins1,Dna2
8_Member	GO Biological Processes	GO:0032392	DNA geometric change	-6.33558	-4.35771	9/39	13211,17216,17217,17219,17220,17420,19360,68275,72162	Dhx9,Mcm2,Mcm4,Mcm6,Mcm7,Mnat1,Rad50,Rpa1,Dhx36
8_Member	GO Biological Processes	GO:0006267	pre-replicative complex assembly involved in nuclear cell cycle DNA replication	-6.2519	-4.28433	5/8	17215,17216,17217,17219,17220	Mcm3,Mcm2,Mcm4,Mcm6,Mcm7
8_Member	GO Biological Processes	GO:0036388	pre-replicative complex assembly	-6.2519	-4.28433	5/8	17215,17216,17217,17219,17220	Mcm3,Mcm2,Mcm4,Mcm6,Mcm7
8_Member	GO Biological Processes	GO:1902299	pre-replicative complex assembly involved in cell cycle DNA replication	-6.2519	-4.28433	5/8	17215,17216,17217,17219,17220	Mcm3,Mcm2,Mcm4,Mcm6,Mcm7
8_Member	Reactome Gene Sets	R-MMU-68867	Assembly of the pre-replicative complex	-6.01913	-4.08892	11/67	17215,17216,17217,17219,17220,18392,19184,26429,53380,66997,78294	Mcm3,Mcm2,Mcm4,Mcm6,Mcm7,Orc1,Psmc5,Orc5,Psmd10,Psmd12,Rps27a
8_Member	GO Molecular Functions	GO:0140097	catalytic activity, acting on DNA	-5.97937	-4.05841	18/182	13211,17216,17217,17219,17220,18968,18972,18973,19360,20174,21749,21976,22256,68058,72162,117599,192119,327762	Dhx9,Mcm2,Mcm4,Mcm6,Mcm7,Pola1,Pold2,Pole,Rad50,Ruvbl2,Terf1,Top3b,Ung,Chd1l,Dhx36,Helb,Dicer1,Dna2
8_Member	Reactome Gene Sets	R-MMU-68949	Orc1 removal from chromatin	-5.82282	-3.92557	11/70	17215,17216,17217,17219,17220,18392,19184,26429,53380,66997,78294	Mcm3,Mcm2,Mcm4,Mcm6,Mcm7,Orc1,Psmc5,Orc5,Psmd10,Psmd12,Rps27a
8_Member	GO Biological Processes	GO:0032508	DNA duplex unwinding	-5.76099	-3.87611	8/34	13211,17216,17217,17219,17220,17420,19360,68275	Dhx9,Mcm2,Mcm4,Mcm6,Mcm7,Mnat1,Rad50,Rpa1
8_Member	Reactome Gene Sets	R-MMU-176187	Activation of ATR in response to replication stress	-5.76099	-3.87611	8/34	17215,17216,17217,17219,17220,18392,26429,68275	Mcm3,Mcm2,Mcm4,Mcm6,Mcm7,Orc1,Orc5,Rpa1
8_Member	GO Biological Processes	GO:1902969	mitotic DNA replication	-5.76056	-3.87611	6/16	17215,17216,17217,17219,18968,69270	Mcm3,Mcm2,Mcm4,Mcm6,Pola1,Gins1
8_Member	GO Molecular Functions	GO:0017116	single-stranded DNA helicase activity	-5.25897	-3.42847	6/19	13211,17216,17219,17220,117599,327762	Dhx9,Mcm2,Mcm6,Mcm7,Helb,Dna2
8_Member	GO Biological Processes	GO:1902292	cell cycle DNA replication initiation	-5.21795	-3.39359	4/6	17215,17216,17217,18968	Mcm3,Mcm2,Mcm4,Pola1
8_Member	GO Biological Processes	GO:1902315	nuclear cell cycle DNA replication initiation	-5.21795	-3.39359	4/6	17215,17216,17217,18968	Mcm3,Mcm2,Mcm4,Pola1
8_Member	GO Biological Processes	GO:1902975	mitotic DNA replication initiation	-5.21795	-3.39359	4/6	17215,17216,17217,18968	Mcm3,Mcm2,Mcm4,Pola1
8_Member	GO Biological Processes	GO:0006268	DNA unwinding involved in DNA replication	-4.58708	-2.84271	5/15	17216,17217,17219,17220,68275	Mcm2,Mcm4,Mcm6,Mcm7,Rpa1
8_Member	GO Molecular Functions	GO:1990518	single-stranded 3'-5' DNA helicase activity	-4.18728	-2.49899	3/4	13211,17219,17220	Dhx9,Mcm6,Mcm7
8_Member	GO Molecular Functions	GO:0043138	3'-5' DNA helicase activity	-3.01441	-1.52169	4/18	13211,17216,17219,17220	Dhx9,Mcm2,Mcm6,Mcm7
9_Summary	GO Biological Processes	GO:0051052	regulation of DNA metabolic process	-14.1984	-11.3789	41/379	11692,11920,12028,13211,13990,14897,15381,15519,17314,17350,17685,17686,17688,18854,19090,19360,19891,20926,21749,21849,21853,50912,51810,51869,52463,53817,54427,67459,70620,70790,72162,73945,77011,93759,99982,107951,117599,237107,245000,252870,319801,14359,53380,67711,14775,15502,15507,19156,19255,20185,56426,57320,66824,68015,71514,71701,223255,225896,268373	Gfer,Atm,Bax,Dhx9,Smarcad1,Trip12,Hnrnpc,Hsp90aa1,Mgmt,Mlh1,Msh2,Msh3,Msh6,Pml,Prkdc,Rad50,Rpa2,Supt6,Terf1,Trim28,Timeless,Exosc10,Hnrnpu,Rif1,Tet1,Ddx39b,Dnmt3l,Nvl,Ube2v2,Ubr5,Dhx36,Otud4,Ticrr,Sirt1,Kdm1a,Cdk9,Helb,Gnl3l,Atr,Usp7,Tigar,Fxr1,Psmd10,Nsmce1,Gpx1,Dnaja1,Hspb1,Psap,Ptpn2,Ncor1,Pdcd10,Park7,Pycard,Trap1,Sfpq,Pnpt1,Stk24,Ubxn1,Ppia
9_Member	GO Biological Processes	GO:0051052	regulation of DNA metabolic process	-14.1984	-11.3789	41/379	11692,11920,12028,13211,13990,14897,15381,15519,17314,17350,17685,17686,17688,18854,19090,19360,19891,20926,21749,21849,21853,50912,51810,51869,52463,53817,54427,67459,70620,70790,72162,73945,77011,93759,99982,107951,117599,237107,245000,252870,319801	Gfer,Atm,Bax,Dhx9,Smarcad1,Trip12,Hnrnpc,Hsp90aa1,Mgmt,Mlh1,Msh2,Msh3,Msh6,Pml,Prkdc,Rad50,Rpa2,Supt6,Terf1,Trim28,Timeless,Exosc10,Hnrnpu,Rif1,Tet1,Ddx39b,Dnmt3l,Nvl,Ube2v2,Ubr5,Dhx36,Otud4,Ticrr,Sirt1,Kdm1a,Cdk9,Helb,Gnl3l,Atr,Usp7,Tigar
9_Member	GO Biological Processes	GO:0051054	positive regulation of DNA metabolic process	-8.61183	-6.3566	24/220	11692,11920,12028,13211,15519,17314,17350,17685,18854,19090,19360,21849,21853,51869,53817,54427,67459,70620,72162,73945,93759,245000,252870,319801	Gfer,Atm,Bax,Dhx9,Hsp90aa1,Mgmt,Mlh1,Msh2,Pml,Prkdc,Rad50,Trim28,Timeless,Rif1,Ddx39b,Dnmt3l,Nvl,Ube2v2,Dhx36,Otud4,Sirt1,Atr,Usp7,Tigar
9_Member	GO Biological Processes	GO:2001020	regulation of response to DNA damage stimulus	-7.22242	-5.11612	22/221	11920,13211,14359,14897,17314,18854,19090,19891,21849,21853,51869,53380,53817,67711,70620,70790,93759,99982,107951,117599,245000,319801	Atm,Dhx9,Fxr1,Trip12,Mgmt,Pml,Prkdc,Rpa2,Trim28,Timeless,Rif1,Psmd10,Ddx39b,Nsmce1,Ube2v2,Ubr5,Sirt1,Kdm1a,Cdk9,Helb,Atr,Tigar
9_Member	GO Biological Processes	GO:0006282	regulation of DNA repair	-6.80566	-4.75823	16/127	13211,14897,17314,18854,19090,19891,21849,21853,51869,70620,70790,93759,99982,107951,117599,319801	Dhx9,Trip12,Mgmt,Pml,Prkdc,Rpa2,Trim28,Timeless,Rif1,Ube2v2,Ubr5,Sirt1,Kdm1a,Cdk9,Helb,Tigar
9_Member	GO Biological Processes	GO:0080135	regulation of cellular response to stress	-6.24814	-4.28226	39/641	11692,11920,12028,13211,14359,14775,14897,15502,15507,17314,18854,19090,19156,19255,19891,20185,21849,21853,51869,53380,53817,56426,57320,66824,67711,68015,70620,70790,71514,71701,93759,99982,107951,117599,223255,225896,245000,268373,319801	Gfer,Atm,Bax,Dhx9,Fxr1,Gpx1,Trip12,Dnaja1,Hspb1,Mgmt,Pml,Prkdc,Psap,Ptpn2,Rpa2,Ncor1,Trim28,Timeless,Rif1,Psmd10,Ddx39b,Pdcd10,Park7,Pycard,Nsmce1,Trap1,Ube2v2,Ubr5,Sfpq,Pnpt1,Sirt1,Kdm1a,Cdk9,Helb,Stk24,Ubxn1,Atr,Ppia,Tigar
9_Member	GO Biological Processes	GO:2001022	positive regulation of response to DNA damage stimulus	-5.19832	-3.37518	13/113	11920,13211,14359,17314,19090,21849,21853,51869,67711,70620,93759,245000,319801	Atm,Dhx9,Fxr1,Mgmt,Prkdc,Trim28,Timeless,Rif1,Nsmce1,Ube2v2,Sirt1,Atr,Tigar
9_Member	GO Biological Processes	GO:2000779	regulation of double-strand break repair	-4.30517	-2.59494	10/83	14897,17314,18854,19090,19891,21853,51869,70790,99982,117599	Trip12,Mgmt,Pml,Prkdc,Rpa2,Timeless,Rif1,Ubr5,Kdm1a,Helb
9_Member	GO Biological Processes	GO:0045739	positive regulation of DNA repair	-3.87155	-2.23054	9/76	13211,17314,19090,21849,21853,51869,70620,93759,319801	Dhx9,Mgmt,Prkdc,Trim28,Timeless,Rif1,Ube2v2,Sirt1,Tigar
10_Summary	GO Biological Processes	GO:0006913	nucleocytoplasmic transport	-13.5938	-10.8515	36/307	12534,13211,13605,15481,15519,16647,18141,18854,19058,19386,19387,20926,21849,22687,24015,28114,53817,54387,57258,57320,57785,66011,68278,70790,71999,72322,73473,76582,103573,110750,217827,218210,234549,320938,328572,353258,18817,20019,23988,51810,67459,70930,93759,240832,338467,12028,15277,15502,17713,17999,20174,21749,21854,30055,56495,71735,75669,18536,56426,68617,192197,235567,240641,252870,1…	Cdk1,Dhx9,Ect2,Hspa8,Hsp90aa1,Kpna2,Nup50,Pml,Ppp3r1,Ranbp2,Rangap1,Supt6,Trim28,Zpr1,Abce1,Nsun2,Ddx39b,Mcm3ap,Xpo4,Park7,Rangrf,Ranbp17,Ddx39a,Ubr5,Fbxo22,Xpo5,Iws1,Ipo11,Xpo1,Cse1l,Nrde2,Nup153,Heatr3,Tnpo3,Ep300,Ltv1,Plk1,Polr1a,Pin1,Hnrnpu,Nvl,Nol8,Sirt1,Tor1aip2,Morc3,Bax,Hk2,Dnaja1,Grpel1,Nedd4,Ruvbl2,Terf1,Timm17a,Timm13,Get3,Lrwd1,Pik3r4,Pcm1,Pdcd10,Mtcl1,Bcas3,Dnajc13,Kif20b,Usp7,Prkci,…
10_Member	GO Biological Processes	GO:0006913	nucleocytoplasmic transport	-13.5938	-10.8515	36/307	12534,13211,13605,15481,15519,16647,18141,18854,19058,19386,19387,20926,21849,22687,24015,28114,53817,54387,57258,57320,57785,66011,68278,70790,71999,72322,73473,76582,103573,110750,217827,218210,234549,320938,328572,353258	Cdk1,Dhx9,Ect2,Hspa8,Hsp90aa1,Kpna2,Nup50,Pml,Ppp3r1,Ranbp2,Rangap1,Supt6,Trim28,Zpr1,Abce1,Nsun2,Ddx39b,Mcm3ap,Xpo4,Park7,Rangrf,Ranbp17,Ddx39a,Ubr5,Fbxo22,Xpo5,Iws1,Ipo11,Xpo1,Cse1l,Nrde2,Nup153,Heatr3,Tnpo3,Ep300,Ltv1
10_Member	GO Biological Processes	GO:0051169	nuclear transport	-13.5938	-10.8515	36/307	12534,13211,13605,15481,15519,16647,18141,18854,19058,19386,19387,20926,21849,22687,24015,28114,53817,54387,57258,57320,57785,66011,68278,70790,71999,72322,73473,76582,103573,110750,217827,218210,234549,320938,328572,353258	Cdk1,Dhx9,Ect2,Hspa8,Hsp90aa1,Kpna2,Nup50,Pml,Ppp3r1,Ranbp2,Rangap1,Supt6,Trim28,Zpr1,Abce1,Nsun2,Ddx39b,Mcm3ap,Xpo4,Park7,Rangrf,Ranbp17,Ddx39a,Ubr5,Fbxo22,Xpo5,Iws1,Ipo11,Xpo1,Cse1l,Nrde2,Nup153,Heatr3,Tnpo3,Ep300,Ltv1
10_Member	GO Biological Processes	GO:0034504	protein localization to nucleus	-9.64407	-7.23674	30/301	12534,13605,15481,15519,16647,18141,18817,18854,19058,19386,19387,20019,21849,22687,23988,51810,57320,67459,70790,70930,76582,93759,103573,110750,218210,234549,240832,320938,328572,338467	Cdk1,Ect2,Hspa8,Hsp90aa1,Kpna2,Nup50,Plk1,Pml,Ppp3r1,Ranbp2,Rangap1,Polr1a,Trim28,Zpr1,Pin1,Hnrnpu,Park7,Nvl,Ubr5,Nol8,Ipo11,Sirt1,Xpo1,Cse1l,Nup153,Heatr3,Tor1aip2,Tnpo3,Ep300,Morc3
10_Member	GO Biological Processes	GO:0046822	regulation of nucleocytoplasmic transport	-7.85529	-5.66981	17/122	12534,13211,13605,15519,19387,20926,21849,22687,28114,57258,57320,70790,73473,103573,217827,218210,328572	Cdk1,Dhx9,Ect2,Hsp90aa1,Rangap1,Supt6,Trim28,Zpr1,Nsun2,Xpo4,Park7,Ubr5,Iws1,Xpo1,Nrde2,Nup153,Ep300
10_Member	GO Biological Processes	GO:0006606	protein import into nucleus	-6.49463	-4.49174	18/168	12534,13605,15481,15519,16647,18141,18854,19058,19386,21849,22687,70790,76582,110750,218210,234549,320938,328572	Cdk1,Ect2,Hspa8,Hsp90aa1,Kpna2,Nup50,Pml,Ppp3r1,Ranbp2,Trim28,Zpr1,Ubr5,Ipo11,Cse1l,Nup153,Heatr3,Tnpo3,Ep300
10_Member	GO Biological Processes	GO:0051170	import into nucleus	-6.3417	-4.36034	18/172	12534,13605,15481,15519,16647,18141,18854,19058,19386,21849,22687,70790,76582,110750,218210,234549,320938,328572	Cdk1,Ect2,Hspa8,Hsp90aa1,Kpna2,Nup50,Pml,Ppp3r1,Ranbp2,Trim28,Zpr1,Ubr5,Ipo11,Cse1l,Nup153,Heatr3,Tnpo3,Ep300
10_Member	GO Biological Processes	GO:0072594	establishment of protein localization to organelle	-6.06382	-4.12417	30/433	12028,12534,13605,15277,15481,15502,15519,16647,17713,17999,18141,18854,19058,19386,20174,21749,21849,21854,22687,30055,56495,70790,71735,75669,76582,110750,218210,234549,320938,328572	Bax,Cdk1,Ect2,Hk2,Hspa8,Dnaja1,Hsp90aa1,Kpna2,Grpel1,Nedd4,Nup50,Pml,Ppp3r1,Ranbp2,Ruvbl2,Terf1,Trim28,Timm17a,Zpr1,Timm13,Get3,Ubr5,Lrwd1,Pik3r4,Ipo11,Cse1l,Nup153,Heatr3,Tnpo3,Ep300
10_Member	GO Biological Processes	GO:0017038	protein import	-5.99079	-4.0683	20/220	12534,13605,15481,15519,16647,17713,18141,18854,19058,19386,21849,21854,22687,70790,76582,110750,218210,234549,320938,328572	Cdk1,Ect2,Hspa8,Hsp90aa1,Kpna2,Grpel1,Nup50,Pml,Ppp3r1,Ranbp2,Trim28,Timm17a,Zpr1,Ubr5,Ipo11,Cse1l,Nup153,Heatr3,Tnpo3,Ep300
10_Member	GO Biological Processes	GO:0032386	regulation of intracellular transport	-5.41455	-3.56227	24/326	12534,13211,13605,15519,18536,19387,20926,21849,22687,28114,56426,57258,57320,68617,70790,73473,103573,192197,217827,218210,235567,240641,252870,328572	Cdk1,Dhx9,Ect2,Hsp90aa1,Pcm1,Rangap1,Supt6,Trim28,Zpr1,Nsun2,Pdcd10,Xpo4,Park7,Mtcl1,Ubr5,Iws1,Xpo1,Bcas3,Nrde2,Nup153,Dnajc13,Kif20b,Usp7,Ep300
10_Member	GO Biological Processes	GO:0046824	positive regulation of nucleocytoplasmic transport	-4.90809	-3.10977	10/71	12534,13211,13605,15519,21849,22687,57258,70790,217827,328572	Cdk1,Dhx9,Ect2,Hsp90aa1,Trim28,Zpr1,Xpo4,Ubr5,Nrde2,Ep300
10_Member	GO Biological Processes	GO:1903827	regulation of cellular protein localization	-4.66324	-2.9086	32/561	12534,13605,15502,15519,17999,18536,18759,18777,18817,18854,19058,19387,20019,21749,21849,22687,23988,56426,57258,57320,57785,67459,68617,70790,93759,99982,103573,192197,218914,237107,240641,328572	Cdk1,Ect2,Dnaja1,Hsp90aa1,Nedd4,Pcm1,Prkci,Lypla1,Plk1,Pml,Ppp3r1,Rangap1,Polr1a,Terf1,Trim28,Zpr1,Pin1,Pdcd10,Xpo4,Park7,Rangrf,Nvl,Mtcl1,Ubr5,Sirt1,Kdm1a,Xpo1,Bcas3,Wapl,Gnl3l,Kif20b,Ep300
10_Member	GO Biological Processes	GO:0032388	positive regulation of intracellular transport	-4.17701	-2.48962	15/181	12534,13211,13605,15519,18536,21849,22687,56426,57258,68617,70790,192197,217827,240641,328572	Cdk1,Dhx9,Ect2,Hsp90aa1,Pcm1,Trim28,Zpr1,Pdcd10,Xpo4,Mtcl1,Ubr5,Bcas3,Nrde2,Kif20b,Ep300
10_Member	GO Biological Processes	GO:0090316	positive regulation of intracellular protein transport	-4.13446	-2.45501	13/142	12534,13605,15519,18536,21849,22687,56426,57258,68617,70790,192197,240641,328572	Cdk1,Ect2,Hsp90aa1,Pcm1,Trim28,Zpr1,Pdcd10,Xpo4,Mtcl1,Ubr5,Bcas3,Kif20b,Ep300
10_Member	GO Biological Processes	GO:0033157	regulation of intracellular protein transport	-3.74661	-2.12667	16/220	12534,13605,15519,18536,19387,21849,22687,56426,57258,57320,68617,70790,103573,192197,240641,328572	Cdk1,Ect2,Hsp90aa1,Pcm1,Rangap1,Trim28,Zpr1,Pdcd10,Xpo4,Park7,Mtcl1,Ubr5,Xpo1,Bcas3,Kif20b,Ep300
10_Member	GO Biological Processes	GO:1900180	regulation of protein localization to nucleus	-3.53455	-1.93978	12/142	12534,13605,15519,20019,21849,22687,23988,57320,67459,70790,93759,328572	Cdk1,Ect2,Hsp90aa1,Polr1a,Trim28,Zpr1,Pin1,Park7,Nvl,Ubr5,Sirt1,Ep300
10_Member	GO Biological Processes	GO:0042307	positive regulation of protein import into nucleus	-3.42111	-1.85544	7/53	12534,13605,15519,21849,22687,70790,328572	Cdk1,Ect2,Hsp90aa1,Trim28,Zpr1,Ubr5,Ep300
10_Member	GO Biological Processes	GO:1904591	positive regulation of protein import	-3.1332	-1.61687	7/59	12534,13605,15519,21849,22687,70790,328572	Cdk1,Ect2,Hsp90aa1,Trim28,Zpr1,Ubr5,Ep300
10_Member	GO Biological Processes	GO:1900182	positive regulation of protein localization to nucleus	-2.55357	-1.15044	8/94	12534,13605,15519,21849,22687,57320,70790,328572	Cdk1,Ect2,Hsp90aa1,Trim28,Zpr1,Park7,Ubr5,Ep300
10_Member	GO Biological Processes	GO:0042306	regulation of protein import into nucleus	-2.48749	-1.098	7/76	12534,13605,15519,21849,22687,70790,328572	Cdk1,Ect2,Hsp90aa1,Trim28,Zpr1,Ubr5,Ep300
10_Member	GO Biological Processes	GO:1904589	regulation of protein import	-2.30374	-0.949533	7/82	12534,13605,15519,21849,22687,70790,328572	Cdk1,Ect2,Hsp90aa1,Trim28,Zpr1,Ubr5,Ep300
10_Member	GO Biological Processes	GO:0070201	regulation of establishment of protein localization	-2.27389	-0.922566	26/591	12534,13605,15502,15519,17999,18536,18777,19058,19387,20336,21749,21849,22687,56426,57258,57320,68617,70790,70799,93759,103573,192197,217325,240641,268373,328572	Cdk1,Ect2,Dnaja1,Hsp90aa1,Nedd4,Pcm1,Lypla1,Ppp3r1,Rangap1,Exoc4,Terf1,Trim28,Zpr1,Pdcd10,Xpo4,Park7,Mtcl1,Ubr5,Cep192,Sirt1,Xpo1,Bcas3,Llgl2,Kif20b,Ppia,Ep300
11_Summary	GO Biological Processes	GO:0006325	chromatin organization	-13.1282	-10.4245	59/778	11920,13194,13990,14897,15161,15201,16468,17216,18193,18854,20174,20185,20585,20591,20926,21849,24086,24116,51810,51869,52463,52609,52615,54169,54387,57320,67674,68058,70790,71514,71735,73473,73703,75410,75605,76804,77605,83797,93759,93760,99982,100683,104248,104263,104383,107435,107932,107951,108143,116871,192119,217827,218850,226182,233904,252870,268697,321006,328572,50995,56459,68043,68133,808…	Atm,Ddb1,Smarcad1,Trip12,Hcfc1,Hells,Jarid2,Mcm2,Nsd1,Pml,Ruvbl2,Ncor1,Hltf,Kdm5c,Supt6,Trim28,Tlk2,Nelfa,Hnrnpu,Rif1,Tet1,Cbx7,Suz12,Kat6b,Mcm3ap,Park7,Trmt112,Chd1l,Ubr5,Sfpq,Lrwd1,Iws1,Dppa2,Kmt2b,Kdm5b,Kdm4c,H2az2,Smarcd1,Sirt1,Arid1a,Kdm1a,Trrap,Cabin1,Kdm3a,Rcor2,Hat1,Chd4,Cdk9,Taf9,Mta3,Dicer1,Nrde2,Tasor,Taf5,Setd1a,Usp7,Ccnb1,Dcaf1,Ep300,Uba2,Sae1,Eef1akmt1,Gcsh,Senp3,Dohh,Smc5,Gnl3l,Rad…
11_Member	GO Biological Processes	GO:0006325	chromatin organization	-13.1282	-10.4245	59/778	11920,13194,13990,14897,15161,15201,16468,17216,18193,18854,20174,20185,20585,20591,20926,21849,24086,24116,51810,51869,52463,52609,52615,54169,54387,57320,67674,68058,70790,71514,71735,73473,73703,75410,75605,76804,77605,83797,93759,93760,99982,100683,104248,104263,104383,107435,107932,107951,108143,116871,192119,217827,218850,226182,233904,252870,268697,321006,328572	Atm,Ddb1,Smarcad1,Trip12,Hcfc1,Hells,Jarid2,Mcm2,Nsd1,Pml,Ruvbl2,Ncor1,Hltf,Kdm5c,Supt6,Trim28,Tlk2,Nelfa,Hnrnpu,Rif1,Tet1,Cbx7,Suz12,Kat6b,Mcm3ap,Park7,Trmt112,Chd1l,Ubr5,Sfpq,Lrwd1,Iws1,Dppa2,Kmt2b,Kdm5b,Kdm4c,H2az2,Smarcd1,Sirt1,Arid1a,Kdm1a,Trrap,Cabin1,Kdm3a,Rcor2,Hat1,Chd4,Cdk9,Taf9,Mta3,Dicer1,Nrde2,Tasor,Taf5,Setd1a,Usp7,Ccnb1,Dcaf1,Ep300
11_Member	GO Biological Processes	GO:0016569	covalent chromatin modification	-13.1093	-10.4147	44/465	11920,13194,13990,14897,15161,15201,16468,18193,18854,20174,20185,20591,20926,21849,24116,51869,52463,52615,54169,57320,67674,70790,71514,73473,73703,75410,75605,76804,93759,99982,100683,104263,104383,107435,107951,108143,116871,218850,226182,233904,252870,268697,321006,328572	Atm,Ddb1,Smarcad1,Trip12,Hcfc1,Hells,Jarid2,Nsd1,Pml,Ruvbl2,Ncor1,Kdm5c,Supt6,Trim28,Nelfa,Rif1,Tet1,Suz12,Kat6b,Park7,Trmt112,Ubr5,Sfpq,Iws1,Dppa2,Kmt2b,Kdm5b,Kdm4c,Sirt1,Kdm1a,Trrap,Kdm3a,Rcor2,Hat1,Cdk9,Taf9,Mta3,Tasor,Taf5,Setd1a,Usp7,Ccnb1,Dcaf1,Ep300
11_Member	GO Biological Processes	GO:1902275	regulation of chromatin organization	-12.1135	-9.49359	28/209	11920,14897,16468,18193,18854,20174,20185,20926,21849,24086,24116,51810,51869,52463,57320,70790,73473,73703,75410,76804,93759,99982,104263,107951,218850,233904,268697,328572	Atm,Trip12,Jarid2,Nsd1,Pml,Ruvbl2,Ncor1,Supt6,Trim28,Tlk2,Nelfa,Hnrnpu,Rif1,Tet1,Park7,Ubr5,Iws1,Dppa2,Kmt2b,Kdm4c,Sirt1,Kdm1a,Kdm3a,Cdk9,Tasor,Setd1a,Ccnb1,Ep300
11_Member	GO Biological Processes	GO:0016570	histone modification	-11.6779	-9.13455	41/451	11920,13194,13990,14897,15161,16468,18193,18854,20174,20185,20591,20926,24116,51869,52463,52615,54169,57320,67674,70790,71514,73473,73703,75410,75605,76804,93759,99982,100683,104263,104383,107435,107951,108143,116871,226182,233904,252870,268697,321006,328572	Atm,Ddb1,Smarcad1,Trip12,Hcfc1,Jarid2,Nsd1,Pml,Ruvbl2,Ncor1,Kdm5c,Supt6,Nelfa,Rif1,Tet1,Suz12,Kat6b,Park7,Trmt112,Ubr5,Sfpq,Iws1,Dppa2,Kmt2b,Kdm5b,Kdm4c,Sirt1,Kdm1a,Trrap,Kdm3a,Rcor2,Hat1,Cdk9,Taf9,Mta3,Taf5,Setd1a,Usp7,Ccnb1,Dcaf1,Ep300
11_Member	GO Biological Processes	GO:0031056	regulation of histone modification	-10.4678	-8.02646	23/164	11920,14897,16468,18193,18854,20174,20185,20926,24116,51869,52463,57320,70790,73473,73703,75410,76804,93759,99982,104263,107951,268697,328572	Atm,Trip12,Jarid2,Nsd1,Pml,Ruvbl2,Ncor1,Supt6,Nelfa,Rif1,Tet1,Park7,Ubr5,Iws1,Dppa2,Kmt2b,Kdm4c,Sirt1,Kdm1a,Kdm3a,Cdk9,Ccnb1,Ep300
11_Member	GO Biological Processes	GO:0018205	peptidyl-lysine modification	-8.83353	-6.53986	32/365	15161,16468,18193,20174,20926,21849,24116,50995,51869,52615,54169,56459,57320,67674,68043,68133,73473,75410,76804,80886,93759,99982,100683,102115,104263,107435,108143,226026,226182,233904,237107,328572	Hcfc1,Jarid2,Nsd1,Ruvbl2,Supt6,Trim28,Nelfa,Uba2,Rif1,Suz12,Kat6b,Sae1,Park7,Trmt112,Eef1akmt1,Gcsh,Iws1,Kmt2b,Kdm4c,Senp3,Sirt1,Kdm1a,Trrap,Dohh,Kdm3a,Hat1,Taf9,Smc5,Taf5,Setd1a,Gnl3l,Ep300
11_Member	GO Biological Processes	GO:2001252	positive regulation of chromosome organization	-8.08808	-5.88732	21/181	11920,16468,18854,19360,20174,20185,21849,24116,51869,52463,68549,71514,72162,93759,99982,107951,218850,226026,245000,268697,328572	Atm,Jarid2,Pml,Rad50,Ruvbl2,Ncor1,Trim28,Nelfa,Rif1,Tet1,Sgo2a,Sfpq,Dhx36,Sirt1,Kdm1a,Cdk9,Tasor,Smc5,Atr,Ccnb1,Ep300
11_Member	GO Biological Processes	GO:0032259	methylation	-8.06172	-5.86489	30/351	15201,16468,17314,18193,20926,21849,22171,24116,28114,51869,52463,52615,54427,56095,67302,67674,68043,71449,73473,73703,75410,76804,93759,99982,104263,225363,232187,233904,238505,240174	Hells,Jarid2,Mgmt,Nsd1,Supt6,Trim28,Tyms,Nelfa,Nsun2,Rif1,Tet1,Suz12,Dnmt3l,Ftsj3,Zc3h13,Trmt112,Eef1akmt1,Eef1aknmt,Iws1,Dppa2,Kmt2b,Kdm4c,Sirt1,Kdm1a,Kdm3a,Etf1,Smyd5,Setd1a,Mtr,Thada
11_Member	GO Biological Processes	GO:0043414	macromolecule methylation	-7.18589	-5.09111	26/300	15201,16468,18193,20926,21849,24116,28114,51869,52463,52615,54427,56095,67302,67674,68043,73473,73703,75410,76804,93759,99982,104263,225363,233904,238505,240174	Hells,Jarid2,Nsd1,Supt6,Trim28,Nelfa,Nsun2,Rif1,Tet1,Suz12,Dnmt3l,Ftsj3,Zc3h13,Trmt112,Eef1akmt1,Iws1,Dppa2,Kmt2b,Kdm4c,Sirt1,Kdm1a,Kdm3a,Etf1,Setd1a,Mtr,Thada
11_Member	GO Biological Processes	GO:0031060	regulation of histone methylation	-7.15509	-5.06708	13/77	16468,18193,20926,24116,51869,52463,73473,73703,75410,76804,93759,99982,104263	Jarid2,Nsd1,Supt6,Nelfa,Rif1,Tet1,Iws1,Dppa2,Kmt2b,Kdm4c,Sirt1,Kdm1a,Kdm3a
11_Member	GO Biological Processes	GO:0006479	protein methylation	-6.56871	-4.55462	19/184	16468,18193,20926,24116,51869,52463,52615,67674,68043,73473,73703,75410,76804,93759,99982,104263,225363,233904,238505	Jarid2,Nsd1,Supt6,Nelfa,Rif1,Tet1,Suz12,Trmt112,Eef1akmt1,Iws1,Dppa2,Kmt2b,Kdm4c,Sirt1,Kdm1a,Kdm3a,Etf1,Setd1a,Mtr
11_Member	GO Biological Processes	GO:0008213	protein alkylation	-6.56871	-4.55462	19/184	16468,18193,20926,24116,51869,52463,52615,67674,68043,73473,73703,75410,76804,93759,99982,104263,225363,233904,238505	Jarid2,Nsd1,Supt6,Nelfa,Rif1,Tet1,Suz12,Trmt112,Eef1akmt1,Iws1,Dppa2,Kmt2b,Kdm4c,Sirt1,Kdm1a,Kdm3a,Etf1,Setd1a,Mtr
11_Member	GO Biological Processes	GO:1905269	positive regulation of chromatin organization	-6.51881	-4.51406	15/117	11920,16468,18854,20174,20185,21849,24116,51869,52463,93759,99982,107951,218850,268697,328572	Atm,Jarid2,Pml,Ruvbl2,Ncor1,Trim28,Nelfa,Rif1,Tet1,Sirt1,Kdm1a,Cdk9,Tasor,Ccnb1,Ep300
11_Member	GO Biological Processes	GO:0016571	histone methylation	-6.01276	-4.0872	16/145	16468,18193,20926,24116,51869,52463,52615,67674,73473,73703,75410,76804,93759,99982,104263,233904	Jarid2,Nsd1,Supt6,Nelfa,Rif1,Tet1,Suz12,Trmt112,Iws1,Dppa2,Kmt2b,Kdm4c,Sirt1,Kdm1a,Kdm3a,Setd1a
11_Member	GO Biological Processes	GO:0018022	peptidyl-lysine methylation	-5.83725	-3.93711	15/132	16468,18193,20926,24116,51869,52615,67674,68043,73473,75410,76804,93759,99982,104263,233904	Jarid2,Nsd1,Supt6,Nelfa,Rif1,Suz12,Trmt112,Eef1akmt1,Iws1,Kmt2b,Kdm4c,Sirt1,Kdm1a,Kdm3a,Setd1a
11_Member	GO Biological Processes	GO:0034968	histone lysine methylation	-5.75796	-3.87491	14/117	16468,18193,20926,24116,51869,52615,67674,73473,75410,76804,93759,99982,104263,233904	Jarid2,Nsd1,Supt6,Nelfa,Rif1,Suz12,Trmt112,Iws1,Kmt2b,Kdm4c,Sirt1,Kdm1a,Kdm3a,Setd1a
11_Member	GO Biological Processes	GO:0031058	positive regulation of histone modification	-5.70078	-3.82051	13/102	11920,16468,18854,20174,20185,24116,51869,52463,93759,99982,107951,268697,328572	Atm,Jarid2,Pml,Ruvbl2,Ncor1,Nelfa,Rif1,Tet1,Sirt1,Kdm1a,Cdk9,Ccnb1,Ep300
11_Member	GO Biological Processes	GO:0010638	positive regulation of organelle organization	-3.13639	-1.61731	29/595	11920,12028,16468,18854,19360,20174,20185,21849,24116,51869,52463,66824,68549,71514,72108,72162,93759,99982,107951,192197,214444,218850,223593,226026,229841,234594,245000,268697,328572	Atm,Bax,Jarid2,Pml,Rad50,Ruvbl2,Ncor1,Trim28,Nelfa,Rif1,Tet1,Pycard,Sgo2a,Sfpq,Ddhd2,Dhx36,Sirt1,Kdm1a,Cdk9,Bcas3,Cdk5rap2,Tasor,Washc5,Smc5,Cenpe,Cnot1,Atr,Ccnb1,Ep300
12_Summary	GO Biological Processes	GO:0007051	spindle organization	-12.7855	-10.1173	27/182	12316,13006,16551,16580,17350,17865,18541,18817,20185,21335,51810,54204,66165,66371,66442,68953,70799,71819,72119,192119,218850,218977,223593,229841,233064,233406,268697,56150,214444,17761,18536,19348,22144,22687,57785,68339,68617,70218,73804,93759,103573,192197,217325,433956	Aspm,Smc3,Kif11,Kifc5b,Mlh1,Mybl2,Pcnt,Plk1,Ncor1,Tacc3,Hnrnpu,Septin1,Bccip,Chmp4c,Spc25,Chmp2a,Cep192,Kif23,Tpx2,Dicer1,Tasor,Dlgap5,Washc5,Cenpe,Wdr62,Prc1,Ccnb1,Mad2l1,Cdk5rap2,Map7,Pcm1,Kif20a,Tuba3a,Zpr1,Rangrf,Ccdc88c,Mtcl1,Kif18b,Kif2c,Sirt1,Xpo1,Bcas3,Llgl2,Dnaaf5
12_Member	GO Biological Processes	GO:0007051	spindle organization	-12.7855	-10.1173	27/182	12316,13006,16551,16580,17350,17865,18541,18817,20185,21335,51810,54204,66165,66371,66442,68953,70799,71819,72119,192119,218850,218977,223593,229841,233064,233406,268697	Aspm,Smc3,Kif11,Kifc5b,Mlh1,Mybl2,Pcnt,Plk1,Ncor1,Tacc3,Hnrnpu,Septin1,Bccip,Chmp4c,Spc25,Chmp2a,Cep192,Kif23,Tpx2,Dicer1,Tasor,Dlgap5,Washc5,Cenpe,Wdr62,Prc1,Ccnb1
12_Member	GO Biological Processes	GO:0051225	spindle assembly	-11.867	-9.2905	21/115	12316,13006,16551,16580,17350,17865,18817,20185,51810,54204,66165,66371,68953,70799,71819,72119,192119,218850,223593,229841,233406	Aspm,Smc3,Kif11,Kifc5b,Mlh1,Mybl2,Plk1,Ncor1,Hnrnpu,Septin1,Bccip,Chmp4c,Chmp2a,Cep192,Kif23,Tpx2,Dicer1,Tasor,Washc5,Cenpe,Prc1
12_Member	GO Biological Processes	GO:0007052	mitotic spindle organization	-11.566	-9.04148	21/119	13006,16551,16580,17865,18541,18817,21335,51810,66165,66371,66442,68953,70799,71819,72119,218850,218977,229841,233064,233406,268697	Smc3,Kif11,Kifc5b,Mybl2,Pcnt,Plk1,Tacc3,Hnrnpu,Bccip,Chmp4c,Spc25,Chmp2a,Cep192,Kif23,Tpx2,Tasor,Dlgap5,Cenpe,Wdr62,Prc1,Ccnb1
12_Member	GO Biological Processes	GO:1902850	microtubule cytoskeleton organization involved in mitosis	-11.5354	-9.01689	23/146	13006,16551,16580,17865,18541,18817,21335,51810,56150,66165,66371,66442,68953,70799,71819,72119,214444,218850,218977,229841,233064,233406,268697	Smc3,Kif11,Kifc5b,Mybl2,Pcnt,Plk1,Tacc3,Hnrnpu,Mad2l1,Bccip,Chmp4c,Spc25,Chmp2a,Cep192,Kif23,Tpx2,Cdk5rap2,Tasor,Dlgap5,Cenpe,Wdr62,Prc1,Ccnb1
12_Member	GO Biological Processes	GO:0000226	microtubule cytoskeleton organization	-9.207	-6.84822	44/609	12316,13006,16551,16580,17350,17761,17865,18536,18541,18817,19348,20185,21335,22144,22687,51810,54204,56150,57785,66165,66371,66442,68339,68617,68953,70218,70799,71819,72119,73804,93759,103573,192119,192197,214444,217325,218850,218977,223593,229841,233064,233406,268697,433956	Aspm,Smc3,Kif11,Kifc5b,Mlh1,Map7,Mybl2,Pcm1,Pcnt,Plk1,Kif20a,Ncor1,Tacc3,Tuba3a,Zpr1,Hnrnpu,Septin1,Mad2l1,Rangrf,Bccip,Chmp4c,Spc25,Ccdc88c,Mtcl1,Chmp2a,Kif18b,Cep192,Kif23,Tpx2,Kif2c,Sirt1,Xpo1,Dicer1,Bcas3,Cdk5rap2,Llgl2,Tasor,Dlgap5,Washc5,Cenpe,Wdr62,Prc1,Ccnb1,Dnaaf5
12_Member	GO Biological Processes	GO:0090307	mitotic spindle assembly	-8.83289	-6.53986	14/68	13006,16551,16580,17865,18817,51810,66165,66371,68953,70799,71819,72119,218850,233406	Smc3,Kif11,Kifc5b,Mybl2,Plk1,Hnrnpu,Bccip,Chmp4c,Chmp2a,Cep192,Kif23,Tpx2,Tasor,Prc1
13_Summary	Reactome Gene Sets	R-MMU-3700989	Transcriptional Regulation by TP53	-11.6257	-9.09495	32/285	11920,12028,12534,12572,14782,17420,17749,18854,20924,21399,23988,24116,50493,58184,66420,66491,68275,69920,72119,78294,107932,107951,108143,226182,231329,234366,234594,252870,268697,319801,327762,328572	Atm,Bax,Cdk1,Cdk7,Gsr,Mnat1,Polr2k,Pml,Supt5,Tcea1,Pin1,Nelfa,Txnrd1,Cnot9,Polr2e,Polr2l,Rpa1,Polr2i,Tpx2,Rps27a,Chd4,Cdk9,Taf9,Taf5,Polr2b,Gatad2a,Cnot1,Usp7,Ccnb1,Tigar,Dna2,Ep300
13_Member	Reactome Gene Sets	R-MMU-3700989	Transcriptional Regulation by TP53	-11.6257	-9.09495	32/285	11920,12028,12534,12572,14782,17420,17749,18854,20924,21399,23988,24116,50493,58184,66420,66491,68275,69920,72119,78294,107932,107951,108143,226182,231329,234366,234594,252870,268697,319801,327762,328572	Atm,Bax,Cdk1,Cdk7,Gsr,Mnat1,Polr2k,Pml,Supt5,Tcea1,Pin1,Nelfa,Txnrd1,Cnot9,Polr2e,Polr2l,Rpa1,Polr2i,Tpx2,Rps27a,Chd4,Cdk9,Taf9,Taf5,Polr2b,Gatad2a,Cnot1,Usp7,Ccnb1,Tigar,Dna2,Ep300
13_Member	Reactome Gene Sets	R-MMU-5633007	Regulation of TP53 Activity	-4.66618	-2.9105	14/145	11920,12534,18854,23988,68275,72119,78294,107932,108143,226182,234366,252870,327762,328572	Atm,Cdk1,Pml,Pin1,Rpa1,Tpx2,Rps27a,Chd4,Taf9,Taf5,Gatad2a,Usp7,Dna2,Ep300
13_Member	Reactome Gene Sets	R-MMU-6804756	Regulation of TP53 Activity through Phosphorylation	-2.96803	-1.48598	8/81	11920,23988,68275,72119,78294,108143,226182,327762	Atm,Pin1,Rpa1,Tpx2,Rps27a,Taf9,Taf5,Dna2
14_Summary	GO Biological Processes	GO:0034502	protein localization to chromosome	-10.7035	-8.23615	18/93	12236,12237,12534,17685,18817,18854,19891,20174,21749,50878,68275,71735,108911,218850,218914,226026,237107,245000	Bub1b,Bub3,Cdk1,Msh2,Plk1,Pml,Rpa2,Ruvbl2,Terf1,Stag3,Rpa1,Lrwd1,Rcc2,Tasor,Wapl,Smc5,Gnl3l,Atr
14_Member	GO Biological Processes	GO:0034502	protein localization to chromosome	-10.7035	-8.23615	18/93	12236,12237,12534,17685,18817,18854,19891,20174,21749,50878,68275,71735,108911,218850,218914,226026,237107,245000	Bub1b,Bub3,Cdk1,Msh2,Plk1,Pml,Rpa2,Ruvbl2,Terf1,Stag3,Rpa1,Lrwd1,Rcc2,Tasor,Wapl,Smc5,Gnl3l,Atr
14_Member	GO Biological Processes	GO:0071168	protein localization to chromatin	-4.02254	-2.36273	6/30	17685,18817,20174,71735,218850,218914	Msh2,Plk1,Ruvbl2,Lrwd1,Tasor,Wapl
15_Summary	GO Biological Processes	GO:0071103	DNA conformation change	-10.6839	-8.22193	28/239	12534,13211,14211,15201,17216,17217,17219,17220,17420,19360,21849,21976,23825,52463,54169,54392,68275,72162,93759,104248,107435,192119,215387,217827,218850,218914,226026,268697,13990,15161,16468,20174,20591,68058,75605,76804,83797,93760,51869,77605,99982,233904,14775,20918,50912,51810,328572,24086	Cdk1,Dhx9,Smc2,Hells,Mcm2,Mcm4,Mcm6,Mcm7,Mnat1,Rad50,Trim28,Top3b,Banf1,Tet1,Kat6b,Ncapg,Rpa1,Dhx36,Sirt1,Cabin1,Hat1,Dicer1,Ncaph,Nrde2,Tasor,Wapl,Smc5,Ccnb1,Smarcad1,Hcfc1,Jarid2,Ruvbl2,Kdm5c,Chd1l,Kdm5b,Kdm4c,Smarcd1,Arid1a,Rif1,H2az2,Kdm1a,Setd1a,Gpx1,Eif1,Exosc10,Hnrnpu,Ep300,Tlk2
15_Member	GO Biological Processes	GO:0071103	DNA conformation change	-10.6839	-8.22193	28/239	12534,13211,14211,15201,17216,17217,17219,17220,17420,19360,21849,21976,23825,52463,54169,54392,68275,72162,93759,104248,107435,192119,215387,217827,218850,218914,226026,268697	Cdk1,Dhx9,Smc2,Hells,Mcm2,Mcm4,Mcm6,Mcm7,Mnat1,Rad50,Trim28,Top3b,Banf1,Tet1,Kat6b,Ncapg,Rpa1,Dhx36,Sirt1,Cabin1,Hat1,Dicer1,Ncaph,Nrde2,Tasor,Wapl,Smc5,Ccnb1
15_Member	GO Biological Processes	GO:0006323	DNA packaging	-6.10996	-4.16712	19/197	12534,14211,15201,17216,21849,23825,52463,54169,54392,93759,104248,107435,192119,215387,217827,218850,218914,226026,268697	Cdk1,Smc2,Hells,Mcm2,Trim28,Banf1,Tet1,Kat6b,Ncapg,Sirt1,Cabin1,Hat1,Dicer1,Ncaph,Nrde2,Tasor,Wapl,Smc5,Ccnb1
15_Member	GO Biological Processes	GO:0006338	chromatin remodeling	-6.04018	-4.10685	17/162	13990,15161,15201,16468,20174,20591,21849,52463,68058,75605,76804,83797,93759,93760,192119,217827,218850	Smarcad1,Hcfc1,Hells,Jarid2,Ruvbl2,Kdm5c,Trim28,Tet1,Chd1l,Kdm5b,Kdm4c,Smarcd1,Sirt1,Arid1a,Dicer1,Nrde2,Tasor
15_Member	GO Biological Processes	GO:0034401	chromatin organization involved in regulation of transcription	-4.83947	-3.05361	14/140	15201,21849,51869,52463,77605,83797,93759,93760,99982,107435,192119,217827,218850,233904	Hells,Trim28,Rif1,Tet1,H2az2,Smarcd1,Sirt1,Arid1a,Kdm1a,Hat1,Dicer1,Nrde2,Tasor,Setd1a
15_Member	GO Biological Processes	GO:0040029	regulation of gene expression, epigenetic	-4.77073	-3.00238	15/161	14775,15201,20918,50912,51810,51869,77605,83797,93759,93760,99982,107435,218850,233904,328572	Gpx1,Hells,Eif1,Exosc10,Hnrnpu,Rif1,H2az2,Smarcd1,Sirt1,Arid1a,Kdm1a,Hat1,Tasor,Setd1a,Ep300
15_Member	GO Biological Processes	GO:0070828	heterochromatin organization	-4.13881	-2.45848	8/55	15201,21849,52463,93759,93760,192119,217827,218850	Hells,Trim28,Tet1,Sirt1,Arid1a,Dicer1,Nrde2,Tasor
15_Member	GO Biological Processes	GO:0097549	chromatin organization involved in negative regulation of transcription	-4.02526	-2.36273	12/126	15201,21849,51869,52463,77605,93759,93760,99982,107435,192119,217827,218850	Hells,Trim28,Rif1,Tet1,H2az2,Sirt1,Arid1a,Kdm1a,Hat1,Dicer1,Nrde2,Tasor
15_Member	GO Biological Processes	GO:0031507	heterochromatin assembly	-3.93969	-2.29025	7/44	15201,21849,52463,93759,192119,217827,218850	Hells,Trim28,Tet1,Sirt1,Dicer1,Nrde2,Tasor
15_Member	GO Biological Processes	GO:0006333	chromatin assembly or disassembly	-3.8545	-2.21747	14/172	15201,17216,21849,24086,52463,54169,83797,93759,93760,104248,107435,192119,217827,218850	Hells,Mcm2,Trim28,Tlk2,Tet1,Kat6b,Smarcd1,Sirt1,Arid1a,Cabin1,Hat1,Dicer1,Nrde2,Tasor
15_Member	GO Biological Processes	GO:0031497	chromatin assembly	-2.77911	-1.3317	11/150	15201,17216,21849,52463,54169,93759,104248,107435,192119,217827,218850	Hells,Mcm2,Trim28,Tet1,Kat6b,Sirt1,Cabin1,Hat1,Dicer1,Nrde2,Tasor
15_Member	GO Biological Processes	GO:0045814	negative regulation of gene expression, epigenetic	-2.46889	-1.08075	8/97	15201,51869,77605,93759,93760,99982,107435,218850	Hells,Rif1,H2az2,Sirt1,Arid1a,Kdm1a,Hat1,Tasor
15_Member	GO Biological Processes	GO:0006342	chromatin silencing	-2.13746	-0.815495	7/88	15201,51869,77605,93759,93760,99982,107435	Hells,Rif1,H2az2,Sirt1,Arid1a,Kdm1a,Hat1
16_Summary	GO Biological Processes	GO:0006403	RNA localization	-10.4232	-7.98692	24/180	11920,13211,19386,20926,21681,21749,24015,28114,50912,51810,53817,54387,66011,68278,71514,71701,72162,72322,73473,103573,217827,218210,245000,353258,19387,57258,57320,110750,63959,239273,17999,18536,19058,55978,108911,223593	Atm,Dhx9,Ranbp2,Supt6,Alyref,Terf1,Abce1,Nsun2,Exosc10,Hnrnpu,Ddx39b,Mcm3ap,Ranbp17,Ddx39a,Sfpq,Pnpt1,Dhx36,Xpo5,Iws1,Xpo1,Nrde2,Nup153,Atr,Ltv1,Rangap1,Xpo4,Park7,Cse1l,Slc29a1,Abcc4,Nedd4,Pcm1,Ppp3r1,Ift20,Rcc2,Washc5
16_Member	GO Biological Processes	GO:0006403	RNA localization	-10.4232	-7.98692	24/180	11920,13211,19386,20926,21681,21749,24015,28114,50912,51810,53817,54387,66011,68278,71514,71701,72162,72322,73473,103573,217827,218210,245000,353258	Atm,Dhx9,Ranbp2,Supt6,Alyref,Terf1,Abce1,Nsun2,Exosc10,Hnrnpu,Ddx39b,Mcm3ap,Ranbp17,Ddx39a,Sfpq,Pnpt1,Dhx36,Xpo5,Iws1,Xpo1,Nrde2,Nup153,Atr,Ltv1
16_Member	GO Biological Processes	GO:0051236	establishment of RNA localization	-9.97723	-7.55081	22/158	11920,13211,19386,20926,21681,21749,24015,28114,51810,53817,54387,66011,68278,71514,71701,72322,73473,103573,217827,218210,245000,353258	Atm,Dhx9,Ranbp2,Supt6,Alyref,Terf1,Abce1,Nsun2,Hnrnpu,Ddx39b,Mcm3ap,Ranbp17,Ddx39a,Sfpq,Pnpt1,Xpo5,Iws1,Xpo1,Nrde2,Nup153,Atr,Ltv1
16_Member	GO Biological Processes	GO:0050657	nucleic acid transport	-7.76838	-5.59122	19/155	13211,19386,20926,21681,24015,28114,51810,53817,54387,66011,68278,71514,71701,72322,73473,103573,217827,218210,353258	Dhx9,Ranbp2,Supt6,Alyref,Abce1,Nsun2,Hnrnpu,Ddx39b,Mcm3ap,Ranbp17,Ddx39a,Sfpq,Pnpt1,Xpo5,Iws1,Xpo1,Nrde2,Nup153,Ltv1
16_Member	GO Biological Processes	GO:0050658	RNA transport	-7.76838	-5.59122	19/155	13211,19386,20926,21681,24015,28114,51810,53817,54387,66011,68278,71514,71701,72322,73473,103573,217827,218210,353258	Dhx9,Ranbp2,Supt6,Alyref,Abce1,Nsun2,Hnrnpu,Ddx39b,Mcm3ap,Ranbp17,Ddx39a,Sfpq,Pnpt1,Xpo5,Iws1,Xpo1,Nrde2,Nup153,Ltv1
16_Member	GO Biological Processes	GO:0051168	nuclear export	-7.62145	-5.46312	18/142	13211,19387,20926,24015,28114,53817,54387,57258,57320,66011,68278,72322,73473,103573,110750,217827,218210,353258	Dhx9,Rangap1,Supt6,Abce1,Nsun2,Ddx39b,Mcm3ap,Xpo4,Park7,Ranbp17,Ddx39a,Xpo5,Iws1,Xpo1,Cse1l,Nrde2,Nup153,Ltv1
16_Member	GO Biological Processes	GO:0015931	nucleobase-containing compound transport	-7.32125	-5.20107	21/200	13211,19386,20926,21681,24015,28114,51810,53817,54387,63959,66011,68278,71514,71701,72322,73473,103573,217827,218210,239273,353258	Dhx9,Ranbp2,Supt6,Alyref,Abce1,Nsun2,Hnrnpu,Ddx39b,Mcm3ap,Slc29a1,Ranbp17,Ddx39a,Sfpq,Pnpt1,Xpo5,Iws1,Xpo1,Nrde2,Nup153,Abcc4,Ltv1
16_Member	GO Biological Processes	GO:0006405	RNA export from nucleus	-6.69362	-4.65626	13/84	13211,20926,24015,28114,53817,54387,68278,72322,73473,103573,217827,218210,353258	Dhx9,Supt6,Abce1,Nsun2,Ddx39b,Mcm3ap,Ddx39a,Xpo5,Iws1,Xpo1,Nrde2,Nup153,Ltv1
16_Member	GO Biological Processes	GO:0046831	regulation of RNA export from nucleus	-6.16759	-4.21502	6/14	13211,20926,28114,73473,217827,218210	Dhx9,Supt6,Nsun2,Iws1,Nrde2,Nup153
16_Member	GO Biological Processes	GO:0006611	protein export from nucleus	-6.14208	-4.19278	15/125	19387,20926,24015,28114,53817,54387,57258,57320,66011,68278,72322,73473,103573,110750,353258	Rangap1,Supt6,Abce1,Nsun2,Ddx39b,Mcm3ap,Xpo4,Park7,Ranbp17,Ddx39a,Xpo5,Iws1,Xpo1,Cse1l,Ltv1
16_Member	GO Biological Processes	GO:0032239	regulation of nucleobase-containing compound transport	-5.58096	-3.7103	6/17	13211,20926,28114,73473,217827,218210	Dhx9,Supt6,Nsun2,Iws1,Nrde2,Nup153
16_Member	GO Biological Processes	GO:0071426	ribonucleoprotein complex export from nucleus	-4.1534	-2.46921	9/70	20926,24015,28114,53817,54387,68278,73473,103573,353258	Supt6,Abce1,Nsun2,Ddx39b,Mcm3ap,Ddx39a,Iws1,Xpo1,Ltv1
16_Member	GO Biological Processes	GO:0071166	ribonucleoprotein complex localization	-4.10433	-2.43333	9/71	20926,24015,28114,53817,54387,68278,73473,103573,353258	Supt6,Abce1,Nsun2,Ddx39b,Mcm3ap,Ddx39a,Iws1,Xpo1,Ltv1
16_Member	GO Biological Processes	GO:0051028	mRNA transport	-3.96253	-2.30907	11/109	13211,19386,20926,21681,28114,53817,54387,66011,68278,73473,103573	Dhx9,Ranbp2,Supt6,Alyref,Nsun2,Ddx39b,Mcm3ap,Ranbp17,Ddx39a,Iws1,Xpo1
16_Member	GO Biological Processes	GO:0031503	protein-containing complex localization	-3.45592	-1.8822	17/257	17999,18536,19058,20926,24015,28114,51810,53817,54387,55978,68278,71514,73473,103573,108911,223593,353258	Nedd4,Pcm1,Ppp3r1,Supt6,Abce1,Nsun2,Hnrnpu,Ddx39b,Mcm3ap,Ift20,Ddx39a,Sfpq,Iws1,Xpo1,Rcc2,Washc5,Ltv1
16_Member	GO Biological Processes	GO:0010793	regulation of mRNA export from nucleus	-3.27026	-1.7314	3/7	20926,28114,73473	Supt6,Nsun2,Iws1
16_Member	GO Biological Processes	GO:2000197	regulation of ribonucleoprotein complex localization	-3.07444	-1.5737	3/8	20926,28114,73473	Supt6,Nsun2,Iws1
16_Member	GO Biological Processes	GO:0006406	mRNA export from nucleus	-2.73712	-1.30332	6/51	20926,28114,53817,54387,68278,73473	Supt6,Nsun2,Ddx39b,Mcm3ap,Ddx39a,Iws1
16_Member	GO Biological Processes	GO:0071427	mRNA-containing ribonucleoprotein complex export from nucleus	-2.73712	-1.30332	6/51	20926,28114,53817,54387,68278,73473	Supt6,Nsun2,Ddx39b,Mcm3ap,Ddx39a,Iws1
17_Summary	GO Biological Processes	GO:0031570	DNA integrity checkpoint	-9.30783	-6.94062	18/112	11920,12534,17685,18392,18817,18854,19090,19891,21853,28000,53817,71702,77011,77065,227331,235323,245000,327762,22224,53380,93759,99982,321006	Atm,Cdk1,Msh2,Orc1,Plk1,Pml,Prkdc,Rpa2,Timeless,Prpf19,Ddx39b,Cdc5l,Ticrr,Ints7,Gigyf2,Usp28,Atr,Dna2,Usp10,Psmd10,Sirt1,Kdm1a,Dcaf1
17_Member	GO Biological Processes	GO:0031570	DNA integrity checkpoint	-9.30783	-6.94062	18/112	11920,12534,17685,18392,18817,18854,19090,19891,21853,28000,53817,71702,77011,77065,227331,235323,245000,327762	Atm,Cdk1,Msh2,Orc1,Plk1,Pml,Prkdc,Rpa2,Timeless,Prpf19,Ddx39b,Cdc5l,Ticrr,Ints7,Gigyf2,Usp28,Atr,Dna2
17_Member	GO Biological Processes	GO:0000077	DNA damage checkpoint	-7.09451	-5.01537	15/106	11920,12534,17685,18817,18854,19090,19891,28000,53817,71702,77011,77065,227331,235323,245000	Atm,Cdk1,Msh2,Plk1,Pml,Prkdc,Rpa2,Prpf19,Ddx39b,Cdc5l,Ticrr,Ints7,Gigyf2,Usp28,Atr
17_Member	GO Biological Processes	GO:0042770	signal transduction in response to DNA damage	-4.7851	-3.01156	11/89	11920,18817,18854,19090,22224,28000,53380,71702,93759,99982,245000	Atm,Plk1,Pml,Prkdc,Usp10,Prpf19,Psmd10,Cdc5l,Sirt1,Kdm1a,Atr
17_Member	GO Biological Processes	GO:0044774	mitotic DNA integrity checkpoint	-4.46775	-2.73736	9/64	11920,12534,17685,18392,18854,19090,19891,77011,227331	Atm,Cdk1,Msh2,Orc1,Pml,Prkdc,Rpa2,Ticrr,Gigyf2
17_Member	GO Biological Processes	GO:0072401	signal transduction involved in DNA integrity checkpoint	-4.2013	-2.50764	6/28	11920,18817,18854,19090,28000,71702	Atm,Plk1,Pml,Prkdc,Prpf19,Cdc5l
17_Member	GO Biological Processes	GO:0072422	signal transduction involved in DNA damage checkpoint	-4.2013	-2.50764	6/28	11920,18817,18854,19090,28000,71702	Atm,Plk1,Pml,Prkdc,Prpf19,Cdc5l
17_Member	GO Biological Processes	GO:0072395	signal transduction involved in cell cycle checkpoint	-4.02254	-2.36273	6/30	11920,18817,18854,19090,28000,71702	Atm,Plk1,Pml,Prkdc,Prpf19,Cdc5l
17_Member	GO Biological Processes	GO:0044773	mitotic DNA damage checkpoint	-3.81337	-2.17871	8/61	11920,12534,17685,18854,19090,19891,77011,227331	Atm,Cdk1,Msh2,Pml,Prkdc,Rpa2,Ticrr,Gigyf2
17_Member	GO Biological Processes	GO:0031571	mitotic G1 DNA damage checkpoint	-3.01441	-1.52169	4/18	18854,19090,19891,227331	Pml,Prkdc,Rpa2,Gigyf2
17_Member	GO Biological Processes	GO:0044783	G1 DNA damage checkpoint	-2.92053	-1.44783	4/19	18854,19090,19891,227331	Pml,Prkdc,Rpa2,Gigyf2
17_Member	GO Biological Processes	GO:0044819	mitotic G1/S transition checkpoint	-2.83241	-1.37735	4/20	18854,19090,19891,227331	Pml,Prkdc,Rpa2,Gigyf2
17_Member	GO Biological Processes	GO:1902402	signal transduction involved in mitotic DNA damage checkpoint	-2.31115	-0.956119	3/14	11920,18854,19090	Atm,Pml,Prkdc
17_Member	GO Biological Processes	GO:1902403	signal transduction involved in mitotic DNA integrity checkpoint	-2.31115	-0.956119	3/14	11920,18854,19090	Atm,Pml,Prkdc
17_Member	GO Biological Processes	GO:0072413	signal transduction involved in mitotic cell cycle checkpoint	-2.14052	-0.817788	3/16	11920,18854,19090	Atm,Pml,Prkdc
17_Member	GO Biological Processes	GO:0033151	V(D)J recombination	-2.06441	-0.751181	3/17	11920,19090,321006	Atm,Prkdc,Dcaf1
18_Summary	GO Biological Processes	GO:0006401	RNA catabolic process	-9.16979	-6.82475	27/259	11920,13211,14359,15381,17350,22687,28114,50912,51810,58184,67010,71701,72162,72198,72662,80913,109075,192119,192170,217827,225363,227331,229663,234594,326622,327762,636931,12028,13850,15368,52463,66422,66065,11834,12785,52609,98758,212442,15519,18521,20425,20534,20924,22171,27370,57320,72322,208643,320267,434423,13681,94223,230734	Atm,Dhx9,Fxr1,Hnrnpc,Mlh1,Zpr1,Nsun2,Exosc10,Hnrnpu,Cnot9,Rbm7,Pnpt1,Dhx36,Mtrex,Dis3,Pum2,Exosc4,Dicer1,Eif4a3,Nrde2,Etf1,Gigyf2,Csde1,Cnot1,Upf2,Dna2,Trim71,Bax,Ephx2,Hmox1,Tet1,Dctpp1,Hsd17b14,Aqr,Cnbp,Cbx7,Hnrnpf,Lactb2,Hsp90aa1,Pcbp2,Shmt1,Slc4a1ap,Supt5,Tyms,Rps26,Park7,Xpo5,Eif4g1,Fubp3,Dppa5a,Eif4a1,Dgcr8,Yrdc
18_Member	GO Biological Processes	GO:0006401	RNA catabolic process	-9.16979	-6.82475	27/259	11920,13211,14359,15381,17350,22687,28114,50912,51810,58184,67010,71701,72162,72198,72662,80913,109075,192119,192170,217827,225363,227331,229663,234594,326622,327762,636931	Atm,Dhx9,Fxr1,Hnrnpc,Mlh1,Zpr1,Nsun2,Exosc10,Hnrnpu,Cnot9,Rbm7,Pnpt1,Dhx36,Mtrex,Dis3,Pum2,Exosc4,Dicer1,Eif4a3,Nrde2,Etf1,Gigyf2,Csde1,Cnot1,Upf2,Dna2,Trim71
18_Member	GO Biological Processes	GO:0019439	aromatic compound catabolic process	-7.34381	-5.21597	32/421	11920,12028,13211,13850,14359,15368,15381,17350,22687,28114,50912,51810,52463,58184,66422,67010,71701,72162,72198,72662,80913,109075,192119,192170,217827,225363,227331,229663,234594,326622,327762,636931	Atm,Bax,Dhx9,Ephx2,Fxr1,Hmox1,Hnrnpc,Mlh1,Zpr1,Nsun2,Exosc10,Hnrnpu,Tet1,Cnot9,Dctpp1,Rbm7,Pnpt1,Dhx36,Mtrex,Dis3,Pum2,Exosc4,Dicer1,Eif4a3,Nrde2,Etf1,Gigyf2,Csde1,Cnot1,Upf2,Dna2,Trim71
18_Member	GO Biological Processes	GO:0044270	cellular nitrogen compound catabolic process	-7.17645	-5.08394	31/406	11920,12028,13211,14359,15368,15381,17350,22687,28114,50912,51810,52463,58184,66422,67010,71701,72162,72198,72662,80913,109075,192119,192170,217827,225363,227331,229663,234594,326622,327762,636931	Atm,Bax,Dhx9,Fxr1,Hmox1,Hnrnpc,Mlh1,Zpr1,Nsun2,Exosc10,Hnrnpu,Tet1,Cnot9,Dctpp1,Rbm7,Pnpt1,Dhx36,Mtrex,Dis3,Pum2,Exosc4,Dicer1,Eif4a3,Nrde2,Etf1,Gigyf2,Csde1,Cnot1,Upf2,Dna2,Trim71
18_Member	GO Biological Processes	GO:0046700	heterocycle catabolic process	-7.15235	-5.06658	31/407	11920,12028,13211,14359,15368,15381,17350,22687,28114,50912,51810,52463,58184,66422,67010,71701,72162,72198,72662,80913,109075,192119,192170,217827,225363,227331,229663,234594,326622,327762,636931	Atm,Bax,Dhx9,Fxr1,Hmox1,Hnrnpc,Mlh1,Zpr1,Nsun2,Exosc10,Hnrnpu,Tet1,Cnot9,Dctpp1,Rbm7,Pnpt1,Dhx36,Mtrex,Dis3,Pum2,Exosc4,Dicer1,Eif4a3,Nrde2,Etf1,Gigyf2,Csde1,Cnot1,Upf2,Dna2,Trim71
18_Member	GO Biological Processes	GO:1901361	organic cyclic compound catabolic process	-7.11788	-5.03654	33/453	11920,12028,13211,13850,14359,15368,15381,17350,22687,28114,50912,51810,52463,58184,66065,66422,67010,71701,72162,72198,72662,80913,109075,192119,192170,217827,225363,227331,229663,234594,326622,327762,636931	Atm,Bax,Dhx9,Ephx2,Fxr1,Hmox1,Hnrnpc,Mlh1,Zpr1,Nsun2,Exosc10,Hnrnpu,Tet1,Cnot9,Hsd17b14,Dctpp1,Rbm7,Pnpt1,Dhx36,Mtrex,Dis3,Pum2,Exosc4,Dicer1,Eif4a3,Nrde2,Etf1,Gigyf2,Csde1,Cnot1,Upf2,Dna2,Trim71
18_Member	GO Biological Processes	GO:0034655	nucleobase-containing compound catabolic process	-6.89253	-4.83687	29/374	11920,12028,13211,14359,15381,17350,22687,28114,50912,51810,58184,66422,67010,71701,72162,72198,72662,80913,109075,192119,192170,217827,225363,227331,229663,234594,326622,327762,636931	Atm,Bax,Dhx9,Fxr1,Hnrnpc,Mlh1,Zpr1,Nsun2,Exosc10,Hnrnpu,Cnot9,Dctpp1,Rbm7,Pnpt1,Dhx36,Mtrex,Dis3,Pum2,Exosc4,Dicer1,Eif4a3,Nrde2,Etf1,Gigyf2,Csde1,Cnot1,Upf2,Dna2,Trim71
18_Member	GO Molecular Functions	GO:0003727	single-stranded RNA binding	-6.11215	-4.1677	13/94	11834,12785,13211,14359,15381,50912,51810,52609,67010,71701,98758,192170,212442	Aqr,Cnbp,Dhx9,Fxr1,Hnrnpc,Exosc10,Hnrnpu,Cbx7,Rbm7,Pnpt1,Hnrnpf,Eif4a3,Lactb2
18_Member	GO Biological Processes	GO:0006402	mRNA catabolic process	-5.95984	-4.04191	20/221	11920,13211,14359,15381,17350,50912,51810,58184,71701,72162,80913,109075,192119,192170,225363,227331,229663,234594,326622,636931	Atm,Dhx9,Fxr1,Hnrnpc,Mlh1,Exosc10,Hnrnpu,Cnot9,Pnpt1,Dhx36,Pum2,Exosc4,Dicer1,Eif4a3,Etf1,Gigyf2,Csde1,Cnot1,Upf2,Trim71
18_Member	GO Molecular Functions	GO:0003729	mRNA binding	-4.54207	-2.80366	23/344	11834,12785,13211,14359,15381,15519,18521,20425,20534,20924,22171,27370,51810,57320,72162,72322,80913,109075,192170,208643,225363,320267,434423	Aqr,Cnbp,Dhx9,Fxr1,Hnrnpc,Hsp90aa1,Pcbp2,Shmt1,Slc4a1ap,Supt5,Tyms,Rps26,Hnrnpu,Park7,Dhx36,Xpo5,Pum2,Exosc4,Eif4a3,Eif4g1,Etf1,Fubp3,Dppa5a
18_Member	GO Biological Processes	GO:0000956	nuclear-transcribed mRNA catabolic process	-3.31759	-1.76871	10/109	11920,17350,50912,72162,109075,192170,225363,229663,234594,326622	Atm,Mlh1,Exosc10,Dhx36,Exosc4,Eif4a3,Etf1,Csde1,Cnot1,Upf2
18_Member	GO Biological Processes	GO:0061013	regulation of mRNA catabolic process	-3.26304	-1.72796	11/131	13211,14359,15381,51810,71701,72162,80913,192119,227331,234594,636931	Dhx9,Fxr1,Hnrnpc,Hnrnpu,Pnpt1,Dhx36,Pum2,Dicer1,Gigyf2,Cnot1,Trim71
18_Member	GO Biological Processes	GO:0043487	regulation of RNA stability	-2.99055	-1.50179	10/120	13211,14359,15381,28114,51810,72162,80913,192119,227331,636931	Dhx9,Fxr1,Hnrnpc,Nsun2,Hnrnpu,Dhx36,Pum2,Dicer1,Gigyf2,Trim71
18_Member	GO Molecular Functions	GO:0003725	double-stranded RNA binding	-2.83147	-1.37735	8/85	13211,13681,14359,51810,72162,94223,192119,230734	Dhx9,Eif4a1,Fxr1,Hnrnpu,Dhx36,Dgcr8,Dicer1,Yrdc
18_Member	GO Biological Processes	GO:0043488	regulation of mRNA stability	-2.77263	-1.32624	9/107	13211,14359,15381,51810,72162,80913,192119,227331,636931	Dhx9,Fxr1,Hnrnpc,Hnrnpu,Dhx36,Pum2,Dicer1,Gigyf2,Trim71
18_Member	GO Biological Processes	GO:1902369	negative regulation of RNA catabolic process	-2.65612	-1.23648	7/71	13211,15381,28114,51810,72162,192119,217827	Dhx9,Hnrnpc,Nsun2,Hnrnpu,Dhx36,Dicer1,Nrde2
18_Member	GO Biological Processes	GO:0043489	RNA stabilization	-2.37664	-1.00985	6/60	13211,15381,28114,51810,72162,192119	Dhx9,Hnrnpc,Nsun2,Hnrnpu,Dhx36,Dicer1
18_Member	GO Molecular Functions	GO:0070034	telomerase RNA binding	-2.14052	-0.817788	3/16	15381,51810,72162	Hnrnpc,Hnrnpu,Dhx36
19_Summary	GO Biological Processes	GO:0008631	intrinsic apoptotic signaling pathway in response to oxidative stress	-9.04253	-6.71218	12/45	14775,15507,18854,19823,56426,57320,68015,71514,93759,223255,228026,268373,11677,11692,12460,13605,14782,15368,16210,18104,19156,71701,238505,269254,11920,15502,14630,18033,20683,50493,12028,15201,19255,66824,99982,16403,53380,14272,17420,18799,21853,50799,72162,234779,319801,328572	Gpx1,Hspb1,Pml,Rnf7,Pdcd10,Park7,Trap1,Sfpq,Sirt1,Stk24,Pdk1,Ppia,Akr1b3,Gfer,Ccs,Ect2,Gsr,Hmox1,Impact,Nqo1,Psap,Pnpt1,Mtr,Setx,Atm,Dnaja1,Gclm,Nfkb1,Sp1,Txnrd1,Bax,Hells,Ptpn2,Pycard,Kdm1a,Itga6,Psmd10,Fnta,Mnat1,Plcd1,Timeless,Slc25a13,Dhx36,Plcg2,Tigar,Ep300
19_Member	GO Biological Processes	GO:0008631	intrinsic apoptotic signaling pathway in response to oxidative stress	-9.04253	-6.71218	12/45	14775,15507,18854,19823,56426,57320,68015,71514,93759,223255,228026,268373	Gpx1,Hspb1,Pml,Rnf7,Pdcd10,Park7,Trap1,Sfpq,Sirt1,Stk24,Pdk1,Ppia
19_Member	GO Biological Processes	GO:0034599	cellular response to oxidative stress	-6.76484	-4.72348	24/274	11677,11692,12460,13605,14775,14782,15368,15507,16210,18104,18854,19156,19823,56426,57320,68015,71514,71701,93759,223255,228026,238505,268373,269254	Akr1b3,Gfer,Ccs,Ect2,Gpx1,Gsr,Hmox1,Hspb1,Impact,Nqo1,Pml,Psap,Rnf7,Pdcd10,Park7,Trap1,Sfpq,Pnpt1,Sirt1,Stk24,Pdk1,Mtr,Ppia,Setx
19_Member	GO Biological Processes	GO:0036473	cell death in response to oxidative stress	-6.60311	-4.58141	14/100	11692,14775,15507,18854,19156,19823,56426,57320,68015,71514,93759,223255,228026,268373	Gfer,Gpx1,Hspb1,Pml,Psap,Rnf7,Pdcd10,Park7,Trap1,Sfpq,Sirt1,Stk24,Pdk1,Ppia
19_Member	GO Biological Processes	GO:0062197	cellular response to chemical stress	-6.34807	-4.36495	26/331	11677,11692,11920,12460,13605,14775,14782,15368,15502,15507,16210,18104,18854,19156,19823,56426,57320,68015,71514,71701,93759,223255,228026,238505,268373,269254	Akr1b3,Gfer,Atm,Ccs,Ect2,Gpx1,Gsr,Hmox1,Dnaja1,Hspb1,Impact,Nqo1,Pml,Psap,Rnf7,Pdcd10,Park7,Trap1,Sfpq,Pnpt1,Sirt1,Stk24,Pdk1,Mtr,Ppia,Setx
19_Member	GO Biological Processes	GO:0006979	response to oxidative stress	-5.57743	-3.71024	28/410	11677,11692,12460,13605,14630,14775,14782,15368,15507,16210,18033,18104,18854,19156,19823,20683,50493,56426,57320,68015,71514,71701,93759,223255,228026,238505,268373,269254	Akr1b3,Gfer,Ccs,Ect2,Gclm,Gpx1,Gsr,Hmox1,Hspb1,Impact,Nfkb1,Nqo1,Pml,Psap,Rnf7,Sp1,Txnrd1,Pdcd10,Park7,Trap1,Sfpq,Pnpt1,Sirt1,Stk24,Pdk1,Mtr,Ppia,Setx
19_Member	GO Biological Processes	GO:1902176	negative regulation of oxidative stress-induced intrinsic apoptotic signaling pathway	-5.41433	-3.56227	6/18	14775,15507,57320,68015,93759,268373	Gpx1,Hspb1,Park7,Trap1,Sirt1,Ppia
19_Member	GO Biological Processes	GO:1902175	regulation of oxidative stress-induced intrinsic apoptotic signaling pathway	-5.41161	-3.56084	7/27	14775,15507,57320,68015,71514,93759,268373	Gpx1,Hspb1,Park7,Trap1,Sfpq,Sirt1,Ppia
19_Member	GO Biological Processes	GO:0042542	response to hydrogen peroxide	-4.87129	-3.0764	13/121	11677,13605,14775,15368,16210,18104,19156,56426,57320,68015,93759,223255,269254	Akr1b3,Ect2,Gpx1,Hmox1,Impact,Nqo1,Psap,Pdcd10,Park7,Trap1,Sirt1,Stk24,Setx
19_Member	GO Biological Processes	GO:1903202	negative regulation of oxidative stress-induced cell death	-4.2573	-2.55636	8/53	11692,14775,15507,19156,57320,68015,93759,268373	Gfer,Gpx1,Hspb1,Psap,Park7,Trap1,Sirt1,Ppia
19_Member	GO Biological Processes	GO:0070301	cellular response to hydrogen peroxide	-4.04415	-2.37761	10/89	11677,13605,16210,18104,19156,56426,57320,68015,93759,269254	Akr1b3,Ect2,Impact,Nqo1,Psap,Pdcd10,Park7,Trap1,Sirt1,Setx
19_Member	GO Biological Processes	GO:1903201	regulation of oxidative stress-induced cell death	-3.78388	-2.15393	9/78	11692,14775,15507,19156,57320,68015,71514,93759,268373	Gfer,Gpx1,Hspb1,Psap,Park7,Trap1,Sfpq,Sirt1,Ppia
19_Member	GO Biological Processes	GO:0000302	response to reactive oxygen species	-3.69326	-2.07712	15/200	11677,12460,13605,14775,15368,16210,18104,19156,56426,57320,68015,93759,223255,238505,269254	Akr1b3,Ccs,Ect2,Gpx1,Hmox1,Impact,Nqo1,Psap,Pdcd10,Park7,Trap1,Sirt1,Stk24,Mtr,Setx
19_Member	GO Biological Processes	GO:0036481	intrinsic apoptotic signaling pathway in response to hydrogen peroxide	-3.50498	-1.92365	3/6	56426,57320,68015	Pdcd10,Park7,Trap1
19_Member	GO Biological Processes	GO:0034614	cellular response to reactive oxygen species	-3.39671	-1.83448	12/147	11677,12460,13605,16210,18104,19156,56426,57320,68015,93759,238505,269254	Akr1b3,Ccs,Ect2,Impact,Nqo1,Psap,Pdcd10,Park7,Trap1,Sirt1,Mtr,Setx
19_Member	GO Biological Processes	GO:1900407	regulation of cellular response to oxidative stress	-3.38554	-1.82597	9/88	11692,14775,15507,19156,57320,68015,71514,93759,268373	Gfer,Gpx1,Hspb1,Psap,Park7,Trap1,Sfpq,Sirt1,Ppia
19_Member	GO Biological Processes	GO:2001242	regulation of intrinsic apoptotic signaling pathway	-3.35716	-1.80155	13/170	12028,14775,15201,15502,15507,19255,57320,66824,68015,71514,93759,99982,268373	Bax,Gpx1,Hells,Dnaja1,Hspb1,Ptpn2,Park7,Pycard,Trap1,Sfpq,Sirt1,Kdm1a,Ppia
19_Member	GO Biological Processes	GO:1902882	regulation of response to oxidative stress	-3.075	-1.5737	9/97	11692,14775,15507,19156,57320,68015,71514,93759,268373	Gfer,Gpx1,Hspb1,Psap,Park7,Trap1,Sfpq,Sirt1,Ppia
19_Member	GO Biological Processes	GO:2001243	negative regulation of intrinsic apoptotic signaling pathway	-3.04289	-1.54617	9/98	14775,15201,15502,15507,57320,68015,93759,99982,268373	Gpx1,Hells,Dnaja1,Hspb1,Park7,Trap1,Sirt1,Kdm1a,Ppia
19_Member	GO Biological Processes	GO:2001234	negative regulation of apoptotic signaling pathway	-2.53991	-1.13834	14/234	12028,14630,14775,15201,15368,15502,15507,16403,53380,57320,68015,93759,99982,268373	Bax,Gclm,Gpx1,Hells,Hmox1,Dnaja1,Hspb1,Itga6,Psmd10,Park7,Trap1,Sirt1,Kdm1a,Ppia
19_Member	GO Biological Processes	GO:0010035	response to inorganic substance	-2.51749	-1.12171	24/508	11677,12460,13605,14272,14775,15368,16210,17420,18104,18799,19156,21853,50799,56426,57320,68015,72162,93759,223255,234779,238505,269254,319801,328572	Akr1b3,Ccs,Ect2,Fnta,Gpx1,Hmox1,Impact,Mnat1,Nqo1,Plcd1,Psap,Timeless,Slc25a13,Pdcd10,Park7,Trap1,Dhx36,Sirt1,Stk24,Plcg2,Mtr,Setx,Tigar,Ep300
19_Member	GO Biological Processes	GO:0010421	hydrogen peroxide-mediated programmed cell death	-2.31115	-0.956119	3/14	56426,57320,68015	Pdcd10,Park7,Trap1
19_Member	GO Biological Processes	GO:0097468	programmed cell death in response to reactive oxygen species	-2.22248	-0.881913	3/15	56426,57320,68015	Pdcd10,Park7,Trap1
20_Summary	GO Biological Processes	GO:0032446	protein modification by small protein conjugation	-9.00478	-6.68967	47/688	12402,13194,14897,15502,15519,17999,18817,19823,20585,21849,23988,28000,50995,52615,53312,53380,56150,56459,57320,63958,67121,67219,67345,68612,68975,70620,70790,71745,71999,77891,78294,93759,99982,107951,108098,207304,208836,213539,216080,216150,217069,225896,231380,237107,268373,321006,636931,18203,18521,18854,19184,22224,24086,50912,50933,66997,67903,71701,76425,84092,103573,108143,170707,2353…	Cbl,Ddb1,Trip12,Dnaja1,Hsp90aa1,Nedd4,Plk1,Rnf7,Hltf,Trim28,Pin1,Prpf19,Uba2,Suz12,Nub1,Psmd10,Mad2l1,Sae1,Park7,Ube4b,Mastl,Med18,Herc4,Ube2c,Med27,Ube2v2,Ubr5,Cul2,Fbxo22,Ube2s,Rps27a,Sirt1,Kdm1a,Cdk9,Med21,Hectd1,Fanci,Bag2,Ube2d1,Cdc34,Trim25,Ubxn1,Uba6,Gnl3l,Ppia,Dcaf1,Trim71,Ntan1,Pcbp2,Pml,Psmc5,Usp10,Tlk2,Exosc10,Uchl3,Psmd12,Gipc1,Pnpt1,Gid8,Usp8,Xpo1,Taf9,Usp48,Usp28,Usp7,Gpx1,Pithd1,Ch…
20_Member	GO Biological Processes	GO:0032446	protein modification by small protein conjugation	-9.00478	-6.68967	47/688	12402,13194,14897,15502,15519,17999,18817,19823,20585,21849,23988,28000,50995,52615,53312,53380,56150,56459,57320,63958,67121,67219,67345,68612,68975,70620,70790,71745,71999,77891,78294,93759,99982,107951,108098,207304,208836,213539,216080,216150,217069,225896,231380,237107,268373,321006,636931	Cbl,Ddb1,Trip12,Dnaja1,Hsp90aa1,Nedd4,Plk1,Rnf7,Hltf,Trim28,Pin1,Prpf19,Uba2,Suz12,Nub1,Psmd10,Mad2l1,Sae1,Park7,Ube4b,Mastl,Med18,Herc4,Ube2c,Med27,Ube2v2,Ubr5,Cul2,Fbxo22,Ube2s,Rps27a,Sirt1,Kdm1a,Cdk9,Med21,Hectd1,Fanci,Bag2,Ube2d1,Cdc34,Trim25,Ubxn1,Uba6,Gnl3l,Ppia,Dcaf1,Trim71
20_Member	GO Biological Processes	GO:0016567	protein ubiquitination	-8.58341	-6.33145	44/638	12402,13194,14897,15502,15519,17999,18817,19823,20585,23988,28000,52615,53312,53380,56150,57320,63958,67121,67219,67345,68612,68975,70620,70790,71745,71999,77891,78294,93759,99982,107951,108098,207304,208836,213539,216080,216150,217069,225896,231380,237107,268373,321006,636931	Cbl,Ddb1,Trip12,Dnaja1,Hsp90aa1,Nedd4,Plk1,Rnf7,Hltf,Pin1,Prpf19,Suz12,Nub1,Psmd10,Mad2l1,Park7,Ube4b,Mastl,Med18,Herc4,Ube2c,Med27,Ube2v2,Ubr5,Cul2,Fbxo22,Ube2s,Rps27a,Sirt1,Kdm1a,Cdk9,Med21,Hectd1,Fanci,Bag2,Ube2d1,Cdc34,Trim25,Ubxn1,Uba6,Gnl3l,Ppia,Dcaf1,Trim71
20_Member	GO Biological Processes	GO:0043632	modification-dependent macromolecule catabolic process	-7.7514	-5.57699	42/632	12402,13194,14897,17999,18203,18521,18817,18854,19184,19823,22224,24086,50912,50933,53312,53380,57320,63958,66997,67903,68612,70620,71701,71745,71999,76425,77891,78294,84092,93759,103573,108143,170707,213539,216080,216150,217069,225896,231380,235323,252870,636931	Cbl,Ddb1,Trip12,Nedd4,Ntan1,Pcbp2,Plk1,Pml,Psmc5,Rnf7,Usp10,Tlk2,Exosc10,Uchl3,Nub1,Psmd10,Park7,Ube4b,Psmd12,Gipc1,Ube2c,Ube2v2,Pnpt1,Cul2,Fbxo22,Gid8,Ube2s,Rps27a,Usp8,Sirt1,Xpo1,Taf9,Usp48,Bag2,Ube2d1,Cdc34,Trim25,Ubxn1,Uba6,Usp28,Usp7,Trim71
20_Member	KEGG Pathway	ko04120	Ubiquitin mediated proteolysis	-7.71915	-5.55017	18/140	12402,13194,14897,17999,18854,19823,28000,50995,56459,63958,67345,68612,70790,71745,77891,216080,216150,231380	Cbl,Ddb1,Trip12,Nedd4,Pml,Rnf7,Prpf19,Uba2,Sae1,Ube4b,Herc4,Ube2c,Ubr5,Cul2,Ube2s,Ube2d1,Cdc34,Uba6
20_Member	KEGG Pathway	mmu04120	Ubiquitin mediated proteolysis	-7.62145	-5.46312	18/142	12402,13194,14897,17999,18854,19823,28000,50995,56459,63958,67345,68612,70790,71745,77891,216080,216150,231380	Cbl,Ddb1,Trip12,Nedd4,Pml,Rnf7,Prpf19,Uba2,Sae1,Ube4b,Herc4,Ube2c,Ubr5,Cul2,Ube2s,Ube2d1,Cdc34,Uba6
20_Member	GO Biological Processes	GO:0051603	proteolysis involved in cellular protein catabolic process	-7.36699	-5.2367	45/726	12402,13194,14775,14897,17999,18203,18521,18817,18854,19184,19823,22224,24086,28000,50933,53312,53380,57320,63958,66193,66371,66997,67903,68612,70620,71745,71999,76425,77891,78294,84092,93759,102122,103573,108143,170707,213539,216080,216150,217069,225896,231380,235323,252870,636931	Cbl,Ddb1,Gpx1,Trip12,Nedd4,Ntan1,Pcbp2,Plk1,Pml,Psmc5,Rnf7,Usp10,Tlk2,Prpf19,Uchl3,Nub1,Psmd10,Park7,Ube4b,Pithd1,Chmp4c,Psmd12,Gipc1,Ube2c,Ube2v2,Cul2,Fbxo22,Gid8,Ube2s,Rps27a,Usp8,Sirt1,Psme3ip1,Xpo1,Taf9,Usp48,Bag2,Ube2d1,Cdc34,Trim25,Ubxn1,Uba6,Usp28,Usp7,Trim71
20_Member	GO Biological Processes	GO:0044257	cellular protein catabolic process	-7.3192	-5.20107	47/779	12402,13194,14775,14897,15519,17999,18203,18521,18817,18854,19156,19184,19823,22224,24086,28000,50933,53312,53380,57320,63958,66193,66371,66997,67903,68612,70620,71745,71999,76425,77891,78294,84092,93759,102122,103573,108143,170707,213539,216080,216150,217069,225896,231380,235323,252870,636931	Cbl,Ddb1,Gpx1,Trip12,Hsp90aa1,Nedd4,Ntan1,Pcbp2,Plk1,Pml,Psap,Psmc5,Rnf7,Usp10,Tlk2,Prpf19,Uchl3,Nub1,Psmd10,Park7,Ube4b,Pithd1,Chmp4c,Psmd12,Gipc1,Ube2c,Ube2v2,Cul2,Fbxo22,Gid8,Ube2s,Rps27a,Usp8,Sirt1,Psme3ip1,Xpo1,Taf9,Usp48,Bag2,Ube2d1,Cdc34,Trim25,Ubxn1,Uba6,Usp28,Usp7,Trim71
20_Member	GO Biological Processes	GO:0019941	modification-dependent protein catabolic process	-7.02328	-4.95067	40/622	12402,13194,14897,17999,18203,18521,18817,18854,19184,19823,22224,24086,50933,53312,53380,57320,63958,66997,67903,68612,70620,71745,71999,76425,77891,78294,84092,93759,103573,108143,170707,213539,216080,216150,217069,225896,231380,235323,252870,636931	Cbl,Ddb1,Trip12,Nedd4,Ntan1,Pcbp2,Plk1,Pml,Psmc5,Rnf7,Usp10,Tlk2,Uchl3,Nub1,Psmd10,Park7,Ube4b,Psmd12,Gipc1,Ube2c,Ube2v2,Cul2,Fbxo22,Gid8,Ube2s,Rps27a,Usp8,Sirt1,Xpo1,Taf9,Usp48,Bag2,Ube2d1,Cdc34,Trim25,Ubxn1,Uba6,Usp28,Usp7,Trim71
20_Member	GO Biological Processes	GO:0006511	ubiquitin-dependent protein catabolic process	-6.77672	-4.73334	39/611	12402,13194,14897,17999,18203,18521,18817,18854,19184,19823,22224,24086,50933,53312,53380,57320,63958,66997,67903,68612,70620,71745,71999,76425,77891,84092,93759,103573,108143,170707,213539,216080,216150,217069,225896,231380,235323,252870,636931	Cbl,Ddb1,Trip12,Nedd4,Ntan1,Pcbp2,Plk1,Pml,Psmc5,Rnf7,Usp10,Tlk2,Uchl3,Nub1,Psmd10,Park7,Ube4b,Psmd12,Gipc1,Ube2c,Ube2v2,Cul2,Fbxo22,Gid8,Ube2s,Usp8,Sirt1,Xpo1,Taf9,Usp48,Bag2,Ube2d1,Cdc34,Trim25,Ubxn1,Uba6,Usp28,Usp7,Trim71
20_Member	GO Biological Processes	GO:0010498	proteasomal protein catabolic process	-6.16208	-4.21115	32/475	13194,14775,17999,18521,18817,18854,19184,24086,28000,53312,53380,57320,63958,66193,66997,67903,68612,70620,71745,71999,76425,77891,93759,102122,103573,108143,213539,216150,217069,225896,252870,636931	Ddb1,Gpx1,Nedd4,Pcbp2,Plk1,Pml,Psmc5,Tlk2,Prpf19,Nub1,Psmd10,Park7,Ube4b,Pithd1,Psmd12,Gipc1,Ube2c,Ube2v2,Cul2,Fbxo22,Gid8,Ube2s,Sirt1,Psme3ip1,Xpo1,Taf9,Bag2,Cdc34,Trim25,Ubxn1,Usp7,Trim71
20_Member	GO Biological Processes	GO:0043161	proteasome-mediated ubiquitin-dependent protein catabolic process	-5.57743	-3.71024	28/410	13194,17999,18521,18817,18854,19184,24086,53312,53380,57320,63958,66997,67903,68612,70620,71745,71999,76425,77891,93759,103573,108143,213539,216150,217069,225896,252870,636931	Ddb1,Nedd4,Pcbp2,Plk1,Pml,Psmc5,Tlk2,Nub1,Psmd10,Park7,Ube4b,Psmd12,Gipc1,Ube2c,Ube2v2,Cul2,Fbxo22,Gid8,Ube2s,Sirt1,Xpo1,Taf9,Bag2,Cdc34,Trim25,Ubxn1,Usp7,Trim71
20_Member	Reactome Gene Sets	R-MMU-1280218	Adaptive Immune System	-4.48171	-2.74935	35/653	14897,16331,16551,16580,17999,18033,19058,19184,19348,19823,22144,53380,66141,66997,67345,68612,70218,70620,71745,71819,71999,73804,77891,78294,80876,110033,209737,216080,216150,229841,231380,234779,240641,321006,636931	Trip12,Inpp5d,Kif11,Kifc5b,Nedd4,Nfkb1,Ppp3r1,Psmc5,Kif20a,Rnf7,Tuba3a,Psmd10,Ifitm3,Psmd12,Herc4,Ube2c,Kif18b,Ube2v2,Cul2,Kif23,Fbxo22,Kif2c,Ube2s,Rps27a,Ifitm2,Kif22,Kif15,Ube2d1,Cdc34,Cenpe,Uba6,Plcg2,Kif20b,Dcaf1,Trim71
20_Member	GO Molecular Functions	GO:0019787	ubiquitin-like protein transferase activity	-3.44421	-1.87254	24/434	12402,14897,17999,18854,19386,19823,20585,21849,28000,63958,67219,67345,67711,68612,68975,70790,71745,77891,108098,207304,216080,216150,217069,636931	Cbl,Trip12,Nedd4,Pml,Ranbp2,Rnf7,Hltf,Trim28,Prpf19,Ube4b,Med18,Herc4,Nsmce1,Ube2c,Med27,Ubr5,Cul2,Ube2s,Med21,Hectd1,Ube2d1,Cdc34,Trim25,Trim71
20_Member	Reactome Gene Sets	R-MMU-983168	Antigen processing: Ubiquitination & Proteasome degradation	-3.40107	-1.8375	18/284	14897,17999,19184,19823,53380,66997,67345,68612,70620,71745,71999,77891,78294,216080,216150,231380,321006,636931	Trip12,Nedd4,Psmc5,Rnf7,Psmd10,Psmd12,Herc4,Ube2c,Ube2v2,Cul2,Fbxo22,Ube2s,Rps27a,Ube2d1,Cdc34,Uba6,Dcaf1,Trim71
20_Member	GO Molecular Functions	GO:0004842	ubiquitin-protein transferase activity	-3.33774	-1.78736	23/415	12402,14897,17999,18854,19823,20585,21849,28000,63958,67219,67345,67711,68612,68975,70790,71745,77891,108098,207304,216080,216150,217069,636931	Cbl,Trip12,Nedd4,Pml,Rnf7,Hltf,Trim28,Prpf19,Ube4b,Med18,Herc4,Nsmce1,Ube2c,Med27,Ubr5,Cul2,Ube2s,Med21,Hectd1,Ube2d1,Cdc34,Trim25,Trim71
20_Member	GO Biological Processes	GO:0070534	protein K63-linked ubiquitination	-3.22488	-1.69545	7/57	14897,17999,28000,70620,70790,77891,207304	Trip12,Nedd4,Prpf19,Ube2v2,Ubr5,Ube2s,Hectd1
20_Member	GO Biological Processes	GO:0000209	protein polyubiquitination	-2.92239	-1.44783	15/237	12402,14897,17999,28000,63958,68612,70620,70790,71999,77891,207304,216080,216150,268373,636931	Cbl,Trip12,Nedd4,Prpf19,Ube4b,Ube2c,Ube2v2,Ubr5,Fbxo22,Ube2s,Hectd1,Ube2d1,Cdc34,Ppia,Trim71
20_Member	GO Molecular Functions	GO:0061630	ubiquitin protein ligase activity	-2.65358	-1.23441	17/304	12402,14897,17999,19823,20585,28000,63958,67219,67345,67711,68975,70790,108098,207304,216080,217069,636931	Cbl,Trip12,Nedd4,Rnf7,Hltf,Prpf19,Ube4b,Med18,Herc4,Nsmce1,Med27,Ubr5,Med21,Hectd1,Ube2d1,Trim25,Trim71
20_Member	GO Molecular Functions	GO:0061659	ubiquitin-like protein ligase activity	-2.52298	-1.12535	17/313	12402,14897,17999,19823,20585,28000,63958,67219,67345,67711,68975,70790,108098,207304,216080,217069,636931	Cbl,Trip12,Nedd4,Rnf7,Hltf,Prpf19,Ube4b,Med18,Herc4,Nsmce1,Med27,Ubr5,Med21,Hectd1,Ube2d1,Trim25,Trim71
20_Member	Reactome Gene Sets	R-MMU-983169	Class I MHC mediated antigen processing & presentation	-2.49375	-1.10202	18/342	14897,17999,19184,19823,53380,66997,67345,68612,70620,71745,71999,77891,78294,216080,216150,231380,321006,636931	Trip12,Nedd4,Psmc5,Rnf7,Psmd10,Psmd12,Herc4,Ube2c,Ube2v2,Cul2,Fbxo22,Ube2s,Rps27a,Ube2d1,Cdc34,Uba6,Dcaf1,Trim71

## Sheet: Cluster 02
GroupID	Category	Term	Description	LogP	Log(q-value)	InTerm_InList	Genes	Symbols
1_Summary	GO Biological Processes	GO:0048193	Golgi vesicle transport	-29.0773	-24.7015	50/269	11736,11765,11776,12068,12847,16834,17918,18195,19325,20224,20333,20742,21787,27054,27277,50797,54161,54198,54214,54399,56041,56418,60409,66050,66482,67180,67804,68505,69162,69608,69940,70028,70349,70361,71169,77254,77371,98710,99371,99683,107338,110379,213827,218035,218811,238123,245828,320714,338366,360013,12304,19359,56445,67838,216197,20615,71732,76608,11771,13427,16554,22152,56444,73710,5203…	Ankfy1,Ap1g1,Ap3d1,Bet1,Copa,Cog1,Myo5a,Nsf,Rab10,Sar1a,Sec22b,Sptbn1,Tfg,Sec23b,Golga5,Copb2,Copg1,Snx3,Golga4,Bet1l,Uso1,Ykt6,Trappc4,0610009B22Rik,Exoc2,Yipf5,Snx2,Vps51,Sec31a,Sec24d,Exoc1,Dop1b,Copb1,Lman1,Nbas,Yif1b,Sec24a,Rabif,Arfgef2,Sec24b,Gbf1,Sec13,Arcn1,Vps41,Sec24c,Cog5,Trappc1,Trappc11,Mia3,Myo18a,Pdia4,Rad23b,Dnaja2,Dnajb11,Ckap4,Snapin,Vps11,Hectd3,Ap2a1,Dync1i2,Kif13b,Tubb3,Actr…
1_Member	GO Biological Processes	GO:0048193	Golgi vesicle transport	-29.0773	-24.7015	50/269	11736,11765,11776,12068,12847,16834,17918,18195,19325,20224,20333,20742,21787,27054,27277,50797,54161,54198,54214,54399,56041,56418,60409,66050,66482,67180,67804,68505,69162,69608,69940,70028,70349,70361,71169,77254,77371,98710,99371,99683,107338,110379,213827,218035,218811,238123,245828,320714,338366,360013	Ankfy1,Ap1g1,Ap3d1,Bet1,Copa,Cog1,Myo5a,Nsf,Rab10,Sar1a,Sec22b,Sptbn1,Tfg,Sec23b,Golga5,Copb2,Copg1,Snx3,Golga4,Bet1l,Uso1,Ykt6,Trappc4,0610009B22Rik,Exoc2,Yipf5,Snx2,Vps51,Sec31a,Sec24d,Exoc1,Dop1b,Copb1,Lman1,Nbas,Yif1b,Sec24a,Rabif,Arfgef2,Sec24b,Gbf1,Sec13,Arcn1,Vps41,Sec24c,Cog5,Trappc1,Trappc11,Mia3,Myo18a
1_Member	Reactome Gene Sets	R-MMU-983170	Antigen Presentation: Folding, assembly and peptide loading of class I MHC	-3.37165	-1.5869	6/41	69162,69608,77371,99683,110379,218811	Sec31a,Sec24d,Sec24a,Sec24b,Sec13,Sec24c
1_Member	KEGG Pathway	mmu04141	Protein processing in endoplasmic reticulum	-4.15823	-2.19739	14/170	12304,19359,20224,27054,56445,67838,69162,69608,70361,77371,99683,110379,216197,218811	Pdia4,Rad23b,Sar1a,Sec23b,Dnaja2,Dnajb11,Sec31a,Sec24d,Lman1,Sec24a,Sec24b,Sec13,Ckap4,Sec24c
1_Member	KEGG Pathway	ko04141	Protein processing in endoplasmic reticulum	-4.24233	-2.26142	14/167	12304,19359,20224,27054,56445,67838,69162,69608,70361,77371,99683,110379,216197,218811	Pdia4,Rad23b,Sar1a,Sec23b,Dnaja2,Dnajb11,Sec31a,Sec24d,Lman1,Sec24a,Sec24b,Sec13,Ckap4,Sec24c
1_Member	GO Molecular Functions	GO:0000149	SNARE binding	-4.42425	-2.41951	12/121	12068,17918,18195,20333,20615,69608,71169,71732,76608,77371,99683,218811	Bet1,Myo5a,Nsf,Sec22b,Snapin,Sec24d,Nbas,Vps11,Hectd3,Sec24a,Sec24b,Sec24c
1_Member	Reactome Gene Sets	R-MMU-5694530	Cargo concentration in the ER	-5.03489	-2.97652	7/32	20333,69608,70361,77371,99683,218811,338366	Sec22b,Sec24d,Lman1,Sec24a,Sec24b,Sec24c,Mia3
1_Member	GO Biological Processes	GO:0090114	COPII-coated vesicle budding	-8.41955	-5.95222	9/25	20224,27054,69162,69608,77371,99683,110379,218811,338366	Sar1a,Sec23b,Sec31a,Sec24d,Sec24a,Sec24b,Sec13,Sec24c,Mia3
1_Member	GO Biological Processes	GO:0006900	vesicle budding from membrane	-8.63262	-6.12013	13/62	11776,20224,27054,54198,69162,69608,77371,99683,107338,110379,218811,338366,360013	Ap3d1,Sar1a,Sec23b,Snx3,Sec31a,Sec24d,Sec24a,Sec24b,Gbf1,Sec13,Sec24c,Mia3,Myo18a
1_Member	GO Biological Processes	GO:0035459	vesicle cargo loading	-10.2691	-7.59226	9/17	20224,27054,69162,69608,77371,99683,110379,218811,338366	Sar1a,Sec23b,Sec31a,Sec24d,Sec24a,Sec24b,Sec13,Sec24c,Mia3
1_Member	Reactome Gene Sets	R-MMU-2132295	MHC class II antigen presentation	-5.16331	-3.08635	13/120	11765,11771,13427,16554,22152,56444,69162,69608,73710,77371,99683,110379,218811	Ap1g1,Ap2a1,Dync1i2,Kif13b,Tubb3,Actr10,Sec31a,Sec24d,Tubb2b,Sec24a,Sec24b,Sec13,Sec24c
1_Member	Reactome Gene Sets	R-MMU-204005	COPII-mediated vesicle transport	-12.4398	-9.60808	17/68	12068,18195,20333,21787,52036,56041,56418,60409,66050,69162,69608,70361,77371,99683,110379,218811,245828	Bet1,Nsf,Sec22b,Tfg,Ppp6r3,Uso1,Ykt6,Trappc4,0610009B22Rik,Sec31a,Sec24d,Lman1,Sec24a,Sec24b,Sec13,Sec24c,Trappc1
1_Member	GO Biological Processes	GO:0006888	endoplasmic reticulum to Golgi vesicle-mediated transport	-17.4326	-14.0111	26/116	12068,12847,20224,20333,21787,27054,50797,54161,56041,56418,60409,66050,67180,69162,69608,70349,70361,77254,77371,99683,110379,213827,218811,245828,320714,338366	Bet1,Copa,Sar1a,Sec22b,Tfg,Sec23b,Copb2,Copg1,Uso1,Ykt6,Trappc4,0610009B22Rik,Yipf5,Sec31a,Sec24d,Copb1,Lman1,Yif1b,Sec24a,Sec24b,Sec13,Arcn1,Sec24c,Trappc1,Trappc11,Mia3
1_Member	Reactome Gene Sets	R-MMU-446203	Asparagine N-linked glycosylation	-17.7799	-14.3072	37/255	12068,12847,13427,14584,16834,18195,19359,20333,20742,21787,22152,50797,52036,54161,54399,56041,56174,56418,56444,60409,66050,69162,69608,70349,70361,73710,77371,99683,107338,109785,110379,213827,218811,224139,238123,245828,338366	Bet1,Copa,Dync1i2,Gfpt2,Cog1,Nsf,Rad23b,Sec22b,Sptbn1,Tfg,Tubb3,Copb2,Ppp6r3,Copg1,Bet1l,Uso1,Nagk,Ykt6,Actr10,Trappc4,0610009B22Rik,Sec31a,Sec24d,Copb1,Lman1,Tubb2b,Sec24a,Sec24b,Gbf1,Pgm3,Sec13,Arcn1,Sec24c,Golgb1,Cog5,Trappc1,Mia3
1_Member	Reactome Gene Sets	R-MMU-5653656	Vesicle-mediated transport	-18.5523	-14.8754	56/567	11765,11771,12068,12847,12848,13427,16554,16834,18195,19325,20333,20615,20742,21787,22042,22152,22241,22365,50797,52036,54161,54214,54399,56041,56418,56444,60409,66050,66147,66713,67804,68449,68505,69162,69608,70349,70361,71169,73710,76954,77371,77980,98732,99683,107338,110379,170760,213827,216344,218503,218811,224139,238123,245828,320714,338366	Ap1g1,Ap2a1,Bet1,Copa,Cops2,Dync1i2,Kif13b,Cog1,Nsf,Rab10,Sec22b,Snapin,Sptbn1,Tfg,Tfrc,Tubb3,Ulk1,Vps45,Copb2,Ppp6r3,Copg1,Golga4,Bet1l,Uso1,Ykt6,Actr10,Trappc4,0610009B22Rik,Necap2,Actr2,Snx2,Tbc1d10b,Vps51,Sec31a,Sec24d,Copb1,Lman1,Nbas,Tubb2b,Denn2b,Sec24a,Sbf1,Rab3gap2,Sec24b,Gbf1,Sec13,Acbd3,Arcn1,Rab21,Fcho2,Sec24c,Golgb1,Cog5,Trappc1,Trappc11,Mia3
1_Member	Reactome Gene Sets	R-MMU-199991	Membrane Trafficking	-19.7763	-16.0026	56/534	11765,11771,12068,12847,12848,13427,16554,16834,18195,19325,20333,20615,20742,21787,22042,22152,22241,22365,50797,52036,54161,54214,54399,56041,56418,56444,60409,66050,66147,66713,67804,68449,68505,69162,69608,70349,70361,71169,73710,76954,77371,77980,98732,99683,107338,110379,170760,213827,216344,218503,218811,224139,238123,245828,320714,338366	Ap1g1,Ap2a1,Bet1,Copa,Cops2,Dync1i2,Kif13b,Cog1,Nsf,Rab10,Sec22b,Snapin,Sptbn1,Tfg,Tfrc,Tubb3,Ulk1,Vps45,Copb2,Ppp6r3,Copg1,Golga4,Bet1l,Uso1,Ykt6,Actr10,Trappc4,0610009B22Rik,Necap2,Actr2,Snx2,Tbc1d10b,Vps51,Sec31a,Sec24d,Copb1,Lman1,Nbas,Tubb2b,Denn2b,Sec24a,Sbf1,Rab3gap2,Sec24b,Gbf1,Sec13,Acbd3,Arcn1,Rab21,Fcho2,Sec24c,Golgb1,Cog5,Trappc1,Trappc11,Mia3
1_Member	Reactome Gene Sets	R-MMU-948021	Transport to the Golgi and subsequent modification	-19.9064	-16.0077	33/170	12068,12847,13427,16834,18195,20333,20742,21787,22152,50797,52036,54161,54399,56041,56418,56444,60409,66050,69162,69608,70349,70361,73710,77371,99683,107338,110379,213827,218811,224139,238123,245828,338366	Bet1,Copa,Dync1i2,Cog1,Nsf,Sec22b,Sptbn1,Tfg,Tubb3,Copb2,Ppp6r3,Copg1,Bet1l,Uso1,Ykt6,Actr10,Trappc4,0610009B22Rik,Sec31a,Sec24d,Copb1,Lman1,Tubb2b,Sec24a,Sec24b,Gbf1,Sec13,Arcn1,Sec24c,Golgb1,Cog5,Trappc1,Mia3
1_Member	Reactome Gene Sets	R-MMU-199977	ER to Golgi Anterograde Transport	-22.5253	-18.4505	33/142	12068,12847,13427,16834,18195,20333,20742,21787,22152,50797,52036,54161,54399,56041,56418,56444,60409,66050,69162,69608,70349,70361,73710,77371,99683,107338,110379,213827,218811,224139,238123,245828,338366	Bet1,Copa,Dync1i2,Cog1,Nsf,Sec22b,Sptbn1,Tfg,Tubb3,Copb2,Ppp6r3,Copg1,Bet1l,Uso1,Ykt6,Actr10,Trappc4,0610009B22Rik,Sec31a,Sec24d,Copb1,Lman1,Tubb2b,Sec24a,Sec24b,Gbf1,Sec13,Arcn1,Sec24c,Golgb1,Cog5,Trappc1,Mia3
1_Member	GO Biological Processes	GO:0090110	COPII-coated vesicle cargo loading	-11.3253	-8.57274	9/14	20224,27054,69162,69608,77371,99683,110379,218811,338366	Sar1a,Sec23b,Sec31a,Sec24d,Sec24a,Sec24b,Sec13,Sec24c,Mia3
2_Summary	WikiPathways	WP662	Amino Acid metabolism	-15.0568	-11.9363	22/96	11364,11898,12035,14645,14661,14854,14860,15107,15356,17448,17449,18293,18563,18597,56454,66945,68738,72039,105148,107869,113868,227095	Acadm,Ass1,Bcat1,Glul,Glud1,Gss,Gsta4,Hadh,Hmgcl,Mdh2,Mdh1,Ogdh,Pcx,Pdha1,Aldh18a1,Sdha,Acss1,Mccc1,Iars,Cth,Acaa1a,Hibch
2_Member	WikiPathways	WP662	Amino Acid metabolism	-15.0568	-11.9363	22/96	11364,11898,12035,14645,14661,14854,14860,15107,15356,17448,17449,18293,18563,18597,56454,66945,68738,72039,105148,107869,113868,227095	Acadm,Ass1,Bcat1,Glul,Glud1,Gss,Gsta4,Hadh,Hmgcl,Mdh2,Mdh1,Ogdh,Pcx,Pdha1,Aldh18a1,Sdha,Acss1,Mccc1,Iars,Cth,Acaa1a,Hibch
3_Summary	GO Molecular Functions	GO:0009055	electron transfer activity	-17.0721	-13.6962	18/88	12857,12858,12861,18105,22272,26926,66445,66576,66694,66916,66945,67184,67680,73723,96979,110826,226646,227197,11639,14004,14467,22273,28080,66152,67530,67914,108037,54405,66108,68342,104130,110323,595136,11938,232975,17448,17449,18293,18597,20917,64602,68263,269951,11783,16440,19055,26413,11739,11740,11771,14874,11364,15275,15356,19045,19046,19309,20848,26380,56421,56717,77559,100198,108155,1102…	Cox4i1,Cox5a,Cox6a1,Nqo2,Uqcrq,Aifm1,Cyc1,Uqcrh,Uqcrfs1,Ndufb7,Sdha,Ndufa13,Sdhb,Sh3bgrl3,Ptges2,Etfb,Ndufs2,Ndufs1,Ak4,Chchd2,Nipsnap2,Uqcrc1,Atp5o,Uqcr10,Uqcrb,Coq9,Shmt2,Ndufa1,Ndufa9,Ndufb10,Ndufb11,Cox6b1,Ndufs5,Atp2a2,Atp1a3,Mdh2,Mdh1,Ogdh,Pdha1,Suclg2,Ireb2,Pdhb,Idh2,Apaf1,Itpr3,Ppp3ca,Mapk1,Slc25a4,Slc25a5,Ap2a1,Gstz1,Acadm,Hk1,Hmgcl,Ppp1ca,Ppp1cb,Pygm,Stat3,Esrrb,Pfkp,Mtor,Agl,H6pd,Ogt,P…
3_Member	GO Molecular Functions	GO:0009055	electron transfer activity	-11.5251	-8.76203	18/88	12857,12858,12861,18105,22272,26926,66445,66576,66694,66916,66945,67184,67680,73723,96979,110826,226646,227197	Cox4i1,Cox5a,Cox6a1,Nqo2,Uqcrq,Aifm1,Cyc1,Uqcrh,Uqcrfs1,Ndufb7,Sdha,Ndufa13,Sdhb,Sh3bgrl3,Ptges2,Etfb,Ndufs2,Ndufs1
3_Member	GO Biological Processes	GO:0006119	oxidative phosphorylation	-10.9808	-8.26771	19/107	11639,12857,12858,12861,14004,14467,22272,22273,28080,66152,66445,66576,66694,66945,67530,67914,108037,226646,227197	Ak4,Cox4i1,Cox5a,Cox6a1,Chchd2,Nipsnap2,Uqcrq,Uqcrc1,Atp5o,Uqcr10,Cyc1,Uqcrh,Uqcrfs1,Sdha,Uqcrb,Coq9,Shmt2,Ndufs2,Ndufs1
3_Member	KEGG Pathway	ko04932	Non-alcoholic fatty liver disease (NAFLD)	-10.8291	-8.12891	22/151	12857,12858,12861,22272,22273,54405,66108,66152,66445,66576,66694,66916,66945,67184,67530,67680,68342,104130,110323,226646,227197,595136	Cox4i1,Cox5a,Cox6a1,Uqcrq,Uqcrc1,Ndufa1,Ndufa9,Uqcr10,Cyc1,Uqcrh,Uqcrfs1,Ndufb7,Sdha,Ndufa13,Uqcrb,Sdhb,Ndufb10,Ndufb11,Cox6b1,Ndufs2,Ndufs1,Ndufs5
3_Member	GO Biological Processes	GO:0042773	ATP synthesis coupled electron transport	-10.8235	-8.12891	15/62	12857,12858,12861,14004,22272,22273,66152,66445,66576,66694,66945,67530,67914,226646,227197	Cox4i1,Cox5a,Cox6a1,Chchd2,Uqcrq,Uqcrc1,Uqcr10,Cyc1,Uqcrh,Uqcrfs1,Sdha,Uqcrb,Coq9,Ndufs2,Ndufs1
3_Member	GO Biological Processes	GO:0022904	respiratory electron transport chain	-10.1562	-7.49642	16/80	12857,12858,12861,14004,22272,22273,66152,66445,66576,66694,66945,67530,67680,67914,226646,227197	Cox4i1,Cox5a,Cox6a1,Chchd2,Uqcrq,Uqcrc1,Uqcr10,Cyc1,Uqcrh,Uqcrfs1,Sdha,Uqcrb,Sdhb,Coq9,Ndufs2,Ndufs1
3_Member	GO Biological Processes	GO:0042775	mitochondrial ATP synthesis coupled electron transport	-10.1273	-7.47579	14/58	12857,12858,12861,14004,22272,22273,66152,66445,66576,66694,66945,67530,67914,226646	Cox4i1,Cox5a,Cox6a1,Chchd2,Uqcrq,Uqcrc1,Uqcr10,Cyc1,Uqcrh,Uqcrfs1,Sdha,Uqcrb,Coq9,Ndufs2
3_Member	CORUM	CORUM:495	Cytochrome bc1-complex, mitochondrial	-9.28217	-6.71927	7/10	22272,22273,66152,66445,66576,66694,67530	Uqcrq,Uqcrc1,Uqcr10,Cyc1,Uqcrh,Uqcrfs1,Uqcrb
3_Member	KEGG Pathway	mmu04932	Non-alcoholic fatty liver disease (NAFLD)	-9.65044	-7.05996	22/173	12857,12858,12861,22272,22273,54405,66108,66152,66445,66576,66694,66916,66945,67184,67530,67680,68342,104130,110323,226646,227197,595136	Cox4i1,Cox5a,Cox6a1,Uqcrq,Uqcrc1,Ndufa1,Ndufa9,Uqcr10,Cyc1,Uqcrh,Uqcrfs1,Ndufb7,Sdha,Ndufa13,Uqcrb,Sdhb,Ndufb10,Ndufb11,Cox6b1,Ndufs2,Ndufs1,Ndufs5
3_Member	GO Biological Processes	GO:0006122	mitochondrial electron transport, ubiquinol to cytochrome c	-8.85199	-6.31474	7/11	22272,22273,66152,66445,66576,66694,67530	Uqcrq,Uqcrc1,Uqcr10,Cyc1,Uqcrh,Uqcrfs1,Uqcrb
3_Member	KEGG Pathway	ko04260	Cardiac muscle contraction	-7.36177	-4.96368	13/78	11938,12857,12858,12861,22272,22273,66152,66445,66576,66694,67530,110323,232975	Atp2a2,Cox4i1,Cox5a,Cox6a1,Uqcrq,Uqcrc1,Uqcr10,Cyc1,Uqcrh,Uqcrfs1,Uqcrb,Cox6b1,Atp1a3
3_Member	KEGG Pathway	mmu04260	Cardiac muscle contraction	-6.21812	-3.9946	13/97	11938,12857,12858,12861,22272,22273,66152,66445,66576,66694,67530,110323,232975	Atp2a2,Cox4i1,Cox5a,Cox6a1,Uqcrq,Uqcrc1,Uqcr10,Cyc1,Uqcrh,Uqcrfs1,Uqcrb,Cox6b1,Atp1a3
3_Member	GO Biological Processes	GO:0009060	aerobic respiration	-11.5877	-8.81392	17/76	12857,12858,12861,17448,17449,18293,18597,20917,64602,66152,66576,66945,67530,67680,68263,108037,269951	Cox4i1,Cox5a,Cox6a1,Mdh2,Mdh1,Ogdh,Pdha1,Suclg2,Ireb2,Uqcr10,Uqcrh,Sdha,Uqcrb,Sdhb,Pdhb,Shmt2,Idh2
3_Member	GO Biological Processes	GO:0022900	electron transport chain	-9.82024	-7.2003	16/84	12857,12858,12861,14004,22272,22273,66152,66445,66576,66694,66945,67530,67680,67914,226646,227197	Cox4i1,Cox5a,Cox6a1,Chchd2,Uqcrq,Uqcrc1,Uqcr10,Cyc1,Uqcrh,Uqcrfs1,Sdha,Uqcrb,Sdhb,Coq9,Ndufs2,Ndufs1
3_Member	Reactome Gene Sets	R-MMU-163200	Respiratory electron transport, ATP synthesis by chemiosmotic coupling, and heat production by uncoupling proteins.	-12.0922	-9.29621	21/118	12857,12858,12861,22272,22273,28080,54405,66108,66152,66445,66576,66694,66916,67184,68342,104130,110323,110826,226646,227197,595136	Cox4i1,Cox5a,Cox6a1,Uqcrq,Uqcrc1,Atp5o,Ndufa1,Ndufa9,Uqcr10,Cyc1,Uqcrh,Uqcrfs1,Ndufb7,Ndufa13,Ndufb10,Ndufb11,Cox6b1,Etfb,Ndufs2,Ndufs1,Ndufs5
3_Member	KEGG Pathway	mmu05010	Alzheimer's disease	-14.688	-11.6344	28/175	11783,11938,12857,12858,12861,16440,19055,22272,22273,26413,28080,54405,66108,66152,66445,66576,66694,66916,66945,67184,67530,67680,68342,104130,110323,226646,227197,595136	Apaf1,Atp2a2,Cox4i1,Cox5a,Cox6a1,Itpr3,Ppp3ca,Uqcrq,Uqcrc1,Mapk1,Atp5o,Ndufa1,Ndufa9,Uqcr10,Cyc1,Uqcrh,Uqcrfs1,Ndufb7,Sdha,Ndufa13,Uqcrb,Sdhb,Ndufb10,Ndufb11,Cox6b1,Ndufs2,Ndufs1,Ndufs5
3_Member	KEGG Pathway	ko05016	Huntington's disease	-12.7742	-9.9169	27/192	11739,11740,11771,11783,12857,12858,12861,22272,22273,28080,54405,66108,66152,66445,66576,66694,66916,66945,67184,67530,67680,68342,104130,110323,226646,227197,595136	Slc25a4,Slc25a5,Ap2a1,Apaf1,Cox4i1,Cox5a,Cox6a1,Uqcrq,Uqcrc1,Atp5o,Ndufa1,Ndufa9,Uqcr10,Cyc1,Uqcrh,Uqcrfs1,Ndufb7,Sdha,Ndufa13,Uqcrb,Sdhb,Ndufb10,Ndufb11,Cox6b1,Ndufs2,Ndufs1,Ndufs5
3_Member	KEGG Pathway	mmu05016	Huntington's disease	-12.7742	-9.9169	27/192	11739,11740,11771,11783,12857,12858,12861,22272,22273,28080,54405,66108,66152,66445,66576,66694,66916,66945,67184,67530,67680,68342,104130,110323,226646,227197,595136	Slc25a4,Slc25a5,Ap2a1,Apaf1,Cox4i1,Cox5a,Cox6a1,Uqcrq,Uqcrc1,Atp5o,Ndufa1,Ndufa9,Uqcr10,Cyc1,Uqcrh,Uqcrfs1,Ndufb7,Sdha,Ndufa13,Uqcrb,Sdhb,Ndufb10,Ndufb11,Cox6b1,Ndufs2,Ndufs1,Ndufs5
3_Member	Reactome Gene Sets	R-MMU-1428517	The citric acid (TCA) cycle and respiratory electron transport	-17.0721	-13.6962	30/168	12857,12858,12861,14874,17448,18293,18597,20917,22272,22273,28080,54405,66108,66152,66445,66576,66694,66916,66945,67184,67680,68263,68342,104130,110323,110826,226646,227197,269951,595136	Cox4i1,Cox5a,Cox6a1,Gstz1,Mdh2,Ogdh,Pdha1,Suclg2,Uqcrq,Uqcrc1,Atp5o,Ndufa1,Ndufa9,Uqcr10,Cyc1,Uqcrh,Uqcrfs1,Ndufb7,Sdha,Ndufa13,Sdhb,Pdhb,Ndufb10,Ndufb11,Cox6b1,Etfb,Ndufs2,Ndufs1,Idh2,Ndufs5
3_Member	GO Biological Processes	GO:0006091	generation of precursor metabolites and energy	-16.9308	-13.5964	45/404	11364,11639,12857,12858,12861,14004,14467,15275,15356,17448,17449,18293,18597,19045,19046,19309,20848,20917,22272,22273,26380,28080,56421,56717,64602,66152,66445,66576,66694,66945,67530,67680,67914,68263,77559,100198,108037,108155,110208,110446,216963,225913,226646,227197,269951	Acadm,Ak4,Cox4i1,Cox5a,Cox6a1,Chchd2,Nipsnap2,Hk1,Hmgcl,Mdh2,Mdh1,Ogdh,Pdha1,Ppp1ca,Ppp1cb,Pygm,Stat3,Suclg2,Uqcrq,Uqcrc1,Esrrb,Atp5o,Pfkp,Mtor,Ireb2,Uqcr10,Cyc1,Uqcrh,Uqcrfs1,Sdha,Uqcrb,Sdhb,Coq9,Pdhb,Agl,H6pd,Shmt2,Ogt,Pgd,Acat1,Git1,Tkfc,Ndufs2,Ndufs1,Idh2
3_Member	KEGG Pathway	mmu05012	Parkinson's disease	-15.9781	-12.7484	27/144	11739,11740,11783,12857,12858,12861,22223,22272,22273,28080,54405,66108,66152,66445,66576,66694,66916,66945,67184,67530,67680,68342,104130,110323,226646,227197,595136	Slc25a4,Slc25a5,Apaf1,Cox4i1,Cox5a,Cox6a1,Uchl1,Uqcrq,Uqcrc1,Atp5o,Ndufa1,Ndufa9,Uqcr10,Cyc1,Uqcrh,Uqcrfs1,Ndufb7,Sdha,Ndufa13,Uqcrb,Sdhb,Ndufb10,Ndufb11,Cox6b1,Ndufs2,Ndufs1,Ndufs5
3_Member	WikiPathways	WP295	Electron Transport Chain	-14.7547	-11.6577	22/99	11739,11740,12857,12858,12861,22272,22273,28080,54405,66108,66152,66576,66694,66916,66945,67530,67680,68342,110323,226646,227197,595136	Slc25a4,Slc25a5,Cox4i1,Cox5a,Cox6a1,Uqcrq,Uqcrc1,Atp5o,Ndufa1,Ndufa9,Uqcr10,Uqcrh,Uqcrfs1,Ndufb7,Sdha,Uqcrb,Sdhb,Ndufb10,Cox6b1,Ndufs2,Ndufs1,Ndufs5
3_Member	KEGG Pathway	ko05010	Alzheimer's disease	-14.688	-11.6344	28/175	11783,11938,12857,12858,12861,16440,19055,22272,22273,26413,28080,54405,66108,66152,66445,66576,66694,66916,66945,67184,67530,67680,68342,104130,110323,226646,227197,595136	Apaf1,Atp2a2,Cox4i1,Cox5a,Cox6a1,Itpr3,Ppp3ca,Uqcrq,Uqcrc1,Mapk1,Atp5o,Ndufa1,Ndufa9,Uqcr10,Cyc1,Uqcrh,Uqcrfs1,Ndufb7,Sdha,Ndufa13,Uqcrb,Sdhb,Ndufb10,Ndufb11,Cox6b1,Ndufs2,Ndufs1,Ndufs5
3_Member	KEGG Pathway	ko00190	Oxidative phosphorylation	-16.8157	-13.5538	27/134	11964,11966,12857,12858,12861,22272,22273,28080,54405,66108,66144,66152,66445,66576,66694,66916,66945,67184,67530,67680,68342,73834,104130,110323,226646,227197,595136	Atp6v1a,Atp6v1b2,Cox4i1,Cox5a,Cox6a1,Uqcrq,Uqcrc1,Atp5o,Ndufa1,Ndufa9,Atp6v1f,Uqcr10,Cyc1,Uqcrh,Uqcrfs1,Ndufb7,Sdha,Ndufa13,Uqcrb,Sdhb,Ndufb10,Atp6v1d,Ndufb11,Cox6b1,Ndufs2,Ndufs1,Ndufs5
3_Member	GO Biological Processes	GO:0046034	ATP metabolic process	-14.3642	-11.3308	33/256	11636,11637,11639,11964,11966,12857,12858,12861,14004,14467,15275,17883,18293,20848,22272,22273,26380,28080,56421,66152,66401,66445,66576,66694,66945,67530,67914,108037,108155,216963,225913,226646,227197	Ak1,Ak2,Ak4,Atp6v1a,Atp6v1b2,Cox4i1,Cox5a,Cox6a1,Chchd2,Nipsnap2,Hk1,Myh3,Ogdh,Stat3,Uqcrq,Uqcrc1,Esrrb,Atp5o,Pfkp,Uqcr10,Nudt2,Cyc1,Uqcrh,Uqcrfs1,Sdha,Uqcrb,Coq9,Shmt2,Ogt,Git1,Tkfc,Ndufs2,Ndufs1
3_Member	GO Biological Processes	GO:0015980	energy derivation by oxidation of organic compounds	-13.8566	-10.8787	32/250	11364,12857,12858,12861,14004,17448,17449,18293,18597,19045,19046,19309,20917,22272,22273,26380,56717,64602,66152,66445,66576,66694,66945,67530,67680,67914,68263,77559,108037,226646,227197,269951	Acadm,Cox4i1,Cox5a,Cox6a1,Chchd2,Mdh2,Mdh1,Ogdh,Pdha1,Ppp1ca,Ppp1cb,Pygm,Suclg2,Uqcrq,Uqcrc1,Esrrb,Mtor,Ireb2,Uqcr10,Cyc1,Uqcrh,Uqcrfs1,Sdha,Uqcrb,Sdhb,Coq9,Pdhb,Agl,Shmt2,Ndufs2,Ndufs1,Idh2
3_Member	Reactome Gene Sets	R-MMU-611105	Respiratory electron transport	-13.0831	-10.1544	20/94	12857,12858,12861,22272,22273,54405,66108,66152,66445,66576,66694,66916,67184,68342,104130,110323,110826,226646,227197,595136	Cox4i1,Cox5a,Cox6a1,Uqcrq,Uqcrc1,Ndufa1,Ndufa9,Uqcr10,Cyc1,Uqcrh,Uqcrfs1,Ndufb7,Ndufa13,Ndufb10,Ndufb11,Cox6b1,Etfb,Ndufs2,Ndufs1,Ndufs5
3_Member	GO Biological Processes	GO:0045333	cellular respiration	-12.9962	-10.0828	25/159	12857,12858,12861,14004,17448,17449,18293,18597,20917,22272,22273,64602,66152,66445,66576,66694,66945,67530,67680,67914,68263,108037,226646,227197,269951	Cox4i1,Cox5a,Cox6a1,Chchd2,Mdh2,Mdh1,Ogdh,Pdha1,Suclg2,Uqcrq,Uqcrc1,Ireb2,Uqcr10,Cyc1,Uqcrh,Uqcrfs1,Sdha,Uqcrb,Sdhb,Coq9,Pdhb,Shmt2,Ndufs2,Ndufs1,Idh2
3_Member	KEGG Pathway	mmu00190	Oxidative phosphorylation	-12.8868	-9.98807	27/190	11964,11966,12857,12858,12861,22272,22273,28080,54405,66108,66144,66152,66445,66576,66694,66916,66945,67184,67530,67680,68342,73834,104130,110323,226646,227197,595136	Atp6v1a,Atp6v1b2,Cox4i1,Cox5a,Cox6a1,Uqcrq,Uqcrc1,Atp5o,Ndufa1,Ndufa9,Atp6v1f,Uqcr10,Cyc1,Uqcrh,Uqcrfs1,Ndufb7,Sdha,Ndufa13,Uqcrb,Sdhb,Ndufb10,Atp6v1d,Ndufb11,Cox6b1,Ndufs2,Ndufs1,Ndufs5
4_Summary	KEGG Pathway	ko00620	Pyruvate metabolism	-7.79393	-5.37236	10/38	11669,17448,17449,18563,18597,68263,68738,76238,110446,110460,14645,66522,107869,108037,52633	Aldh2,Mdh2,Mdh1,Pcx,Pdha1,Pdhb,Acss1,Grhpr,Acat1,Acat2,Glul,Pgpep1,Cth,Shmt2,Nit2
4_Member	KEGG Pathway	ko00620	Pyruvate metabolism	-7.79393	-5.37236	10/38	11669,17448,17449,18563,18597,68263,68738,76238,110446,110460	Aldh2,Mdh2,Mdh1,Pcx,Pdha1,Pdhb,Acss1,Grhpr,Acat1,Acat2
4_Member	KEGG Pathway	mmu00620	Pyruvate metabolism	-7.33848	-4.94494	10/42	11669,17448,17449,18563,18597,68263,68738,76238,110446,110460	Aldh2,Mdh2,Mdh1,Pcx,Pdha1,Pdhb,Acss1,Grhpr,Acat1,Acat2
4_Member	KEGG Pathway	mmu00630	Glyoxylate and dicarboxylate metabolism	-6.05668	-3.84224	9/44	14645,17448,17449,66522,76238,107869,108037,110446,110460	Glul,Mdh2,Mdh1,Pgpep1,Grhpr,Cth,Shmt2,Acat1,Acat2
4_Member	KEGG Pathway	ko00630	Glyoxylate and dicarboxylate metabolism	-5.34137	-3.22801	7/29	14645,17448,17449,76238,108037,110446,110460	Glul,Mdh2,Mdh1,Grhpr,Shmt2,Acat1,Acat2
4_Member	GO Biological Processes	GO:0006107	oxaloacetate metabolic process	-4.01163	-2.08298	4/11	17448,17449,18563,52633	Mdh2,Mdh1,Pcx,Nit2
5_Summary	WikiPathways	WP2318	Fatty acid oxidation	-16.8461	-13.5538	6/10	11364,11370,11409,12894,15107,52538,97212,113868,231086,13167,13177,102632,15212,19299,20280,20524,20598,56717,110446,110460,110826,270076,14979,16993,57279,57874,96979,110959,625249,55980,66508,74302,13026,14149,15356,20602,23943,67902,71911,76303,77980,13849,17918,66400,67103,68738,66945,67680,109778,66117,68917,11749,14268,14854,14862,17967,18293,18563,18738,22240,56330,170760,232975,18105,190…	Acadm,Acadvl,Acads,Cpt1a,Hadh,Acaa2,Hadha,Acaa1a,Hadhb,Dbi,Eci1,Acad11,Hexb,Abcd3,Scp2,Slc25a17,Smpd2,Mtor,Acat1,Acat2,Etfb,Gcdh,H2-Ke6,Lta4h,Slc25a20,Hacd3,Ptges2,Nudt19,Gpx4,Impa1,Lamtor1,Mtmr3,Pcyt1a,Fdxr,Hmgcl,Ncor2,Esyt1,Sumf2,Bdh1,Osbp,Sbf1,Ephx1,Myo5a,Alkbh7,Ptgr1,Acss1,Sdha,Sdhb,Blvra,Fmc1,Hint2,Anxa6,Fn1,Gss,Gstm1,Ncam1,Ogdh,Pcx,Pitpna,Dpysl3,Pdcd5,Acbd3,Atp1a3,Nqo2,Ppp3ca,Npepps,Tubb3,P…
5_Member	WikiPathways	WP2318	Fatty acid oxidation	-7.4259	-5.02322	6/10	11364,11370,11409,12894,15107,52538	Acadm,Acadvl,Acads,Cpt1a,Hadh,Acaa2
5_Member	KEGG Pathway	M00087	beta-Oxidation	-8.15427	-5.70788	7/13	11364,11370,15107,52538,97212,113868,231086	Acadm,Acadvl,Hadh,Acaa2,Hadha,Acaa1a,Hadhb
5_Member	KEGG Pathway	mmu_M00087	beta-Oxidation	-8.15427	-5.70788	7/13	11364,11370,15107,52538,97212,113868,231086	Acadm,Acadvl,Hadh,Acaa2,Hadha,Acaa1a,Hadhb
5_Member	Reactome Gene Sets	R-MMU-77289	Mitochondrial Fatty Acid Beta-Oxidation	-8.04454	-5.60323	10/36	11364,11370,11409,13167,13177,15107,52538,97212,102632,231086	Acadm,Acadvl,Acads,Dbi,Eci1,Hadh,Acaa2,Hadha,Acad11,Hadhb
5_Member	Reactome Gene Sets	R-MMU-77286	mitochondrial fatty acid beta-oxidation of saturated fatty acids	-7.81486	-5.38844	6/9	11364,11370,11409,15107,97212,231086	Acadm,Acadvl,Acads,Hadh,Hadha,Hadhb
5_Member	GO Biological Processes	GO:0044242	cellular lipid catabolic process	-7.74901	-5.33224	22/218	11364,11370,11409,12894,13167,13177,15107,15212,19299,20280,20524,20598,52538,56717,97212,102632,110446,110460,110826,113868,231086,270076	Acadm,Acadvl,Acads,Cpt1a,Dbi,Eci1,Hadh,Hexb,Abcd3,Scp2,Slc25a17,Smpd2,Acaa2,Mtor,Hadha,Acad11,Acat1,Acat2,Etfb,Acaa1a,Hadhb,Gcdh
5_Member	Reactome Gene Sets	R-MMU-8978868	Fatty acid metabolism	-8.23349	-5.77675	20/170	11364,11370,11409,12894,13167,13177,14979,15107,16993,20524,52538,57279,57874,96979,97212,102632,110959,113868,231086,625249	Acadm,Acadvl,Acads,Cpt1a,Dbi,Eci1,H2-Ke6,Hadh,Lta4h,Slc25a17,Acaa2,Slc25a20,Hacd3,Ptges2,Hadha,Acad11,Nudt19,Acaa1a,Hadhb,Gpx4
5_Member	GO Biological Processes	GO:0030258	lipid modification	-7.22312	-4.85591	23/253	11364,11370,11409,12894,13167,13177,15107,19299,20280,20524,52538,55980,56717,66508,74302,97212,102632,110446,110460,110826,113868,231086,270076	Acadm,Acadvl,Acads,Cpt1a,Dbi,Eci1,Hadh,Abcd3,Scp2,Slc25a17,Acaa2,Impa1,Mtor,Lamtor1,Mtmr3,Hadha,Acad11,Acat1,Acat2,Etfb,Acaa1a,Hadhb,Gcdh
5_Member	Reactome Gene Sets	R-MMU-556833	Metabolism of lipids	-5.50466	-3.3669	34/591	11364,11370,11409,12894,13026,13167,13177,14149,14979,15107,15212,15356,16993,20524,20598,20602,23943,52538,57279,57874,67902,71911,74302,76303,77980,96979,97212,102632,110446,110460,110959,113868,231086,625249	Acadm,Acadvl,Acads,Cpt1a,Pcyt1a,Dbi,Eci1,Fdxr,H2-Ke6,Hadh,Hexb,Hmgcl,Lta4h,Slc25a17,Smpd2,Ncor2,Esyt1,Acaa2,Slc25a20,Hacd3,Sumf2,Bdh1,Mtmr3,Osbp,Sbf1,Ptges2,Hadha,Acad11,Acat1,Acat2,Nudt19,Acaa1a,Hadhb,Gpx4
5_Member	GO Biological Processes	GO:0006631	fatty acid metabolic process	-6.50424	-4.23564	29/412	11364,11370,11409,12894,13167,13177,13849,14979,15107,17918,19299,20280,20524,52538,56717,57874,66400,67103,68738,96979,97212,102632,110446,110460,110826,113868,231086,270076,625249	Acadm,Acadvl,Acads,Cpt1a,Dbi,Eci1,Ephx1,H2-Ke6,Hadh,Myo5a,Abcd3,Scp2,Slc25a17,Acaa2,Mtor,Hacd3,Alkbh7,Ptgr1,Acss1,Ptges2,Hadha,Acad11,Acat1,Acat2,Etfb,Acaa1a,Hadhb,Gcdh,Gpx4
5_Member	GO Molecular Functions	GO:0016627	oxidoreductase activity, acting on the CH-CH group of donors	-6.01199	-3.80644	10/57	11364,11370,11409,66945,67103,67680,102632,109778,113868,270076	Acadm,Acadvl,Acads,Sdha,Ptgr1,Sdhb,Acad11,Blvra,Acaa1a,Gcdh
5_Member	GO Molecular Functions	GO:0003995	acyl-CoA dehydrogenase activity	-5.73367	-3.56078	5/10	11364,11370,11409,102632,270076	Acadm,Acadvl,Acads,Acad11,Gcdh
5_Member	GO Biological Processes	GO:0016042	lipid catabolic process	-5.73025	-3.56078	24/330	11364,11370,11409,12894,13167,13177,15107,15212,19299,20280,20524,20598,52538,56717,66117,68917,97212,102632,110446,110460,110826,113868,231086,270076	Acadm,Acadvl,Acads,Cpt1a,Dbi,Eci1,Hadh,Hexb,Abcd3,Scp2,Slc25a17,Smpd2,Acaa2,Mtor,Fmc1,Hint2,Hadha,Acad11,Acat1,Acat2,Etfb,Acaa1a,Hadhb,Gcdh
5_Member	GO Molecular Functions	GO:1901681	sulfur compound binding	-5.11156	-3.04538	20/265	11364,11370,11409,11749,13167,14268,14854,14862,15356,17967,18293,18563,18738,20280,22240,56330,97212,170760,232975,270076	Acadm,Acadvl,Acads,Anxa6,Dbi,Fn1,Gss,Gstm1,Hmgcl,Ncam1,Ogdh,Pcx,Pitpna,Scp2,Dpysl3,Pdcd5,Hadha,Acbd3,Atp1a3,Gcdh
5_Member	GO Molecular Functions	GO:0033218	amide binding	-3.52144	-1.70433	22/398	11364,11370,11409,13167,14854,14862,15356,18105,18563,18738,19055,19155,20280,22152,68816,97212,108155,170760,217337,227720,232975,270076	Acadm,Acadvl,Acads,Dbi,Gss,Gstm1,Hmgcl,Nqo2,Pcx,Pitpna,Ppp3ca,Npepps,Scp2,Tubb3,Ppil1,Hadha,Ogt,Acbd3,Srp68,Nup214,Atp1a3,Gcdh
5_Member	KEGG Pathway	mmu01212	Fatty acid metabolism	-8.52274	-6.03902	12/52	11364,11370,11409,12894,15107,52538,57874,97212,110446,110460,113868,231086	Acadm,Acadvl,Acads,Cpt1a,Hadh,Acaa2,Hacd3,Hadha,Acat1,Acat2,Acaa1a,Hadhb
5_Member	GO Biological Processes	GO:0033539	fatty acid beta-oxidation using acyl-CoA dehydrogenase	-7.09245	-4.73783	6/11	11364,11370,11409,102632,110826,270076	Acadm,Acadvl,Acads,Acad11,Etfb,Gcdh
5_Member	KEGG Pathway	ko01212	Fatty acid metabolism	-8.52274	-6.03902	12/52	11364,11370,11409,12894,15107,52538,57874,97212,110446,110460,113868,231086	Acadm,Acadvl,Acads,Cpt1a,Hadh,Acaa2,Hacd3,Hadha,Acat1,Acat2,Acaa1a,Hadhb
5_Member	GO Molecular Functions	GO:0050660	flavin adenine dinucleotide binding	-3.71254	-1.84458	9/84	11364,11370,11409,18105,26926,66945,102632,171580,270076	Acadm,Acadvl,Acads,Nqo2,Aifm1,Sdha,Acad11,Mical1,Gcdh
5_Member	WikiPathways	WP1269	Fatty Acid Beta Oxidation	-9.5915	-7.01503	11/34	11364,11370,11409,12894,13177,15107,57279,97212,110446,231086,270076	Acadm,Acadvl,Acads,Cpt1a,Eci1,Hadh,Slc25a20,Hadha,Acat1,Hadhb,Gcdh
5_Member	GO Biological Processes	GO:0016054	organic acid catabolic process	-16.8461	-13.5538	33/212	11364,11370,11409,12035,12039,12894,13167,13177,14661,14874,15107,15356,19299,20280,20524,52538,56174,56717,58810,78038,97212,102632,104776,108037,110208,110446,110460,110826,113868,212647,227095,231086,270076	Acadm,Acadvl,Acads,Bcat1,Bckdha,Cpt1a,Dbi,Eci1,Glud1,Gstz1,Hadh,Hmgcl,Abcd3,Scp2,Slc25a17,Acaa2,Nagk,Mtor,Akr1a1,Mccc2,Hadha,Acad11,Aldh6a1,Shmt2,Pgd,Acat1,Acat2,Etfb,Acaa1a,Aldh4a1,Hibch,Hadhb,Gcdh
5_Member	GO Molecular Functions	GO:0120227	acyl-CoA binding	-9.2562	-6.69994	10/28	11364,11370,11409,13167,15356,18738,20280,97212,170760,270076	Acadm,Acadvl,Acads,Dbi,Hmgcl,Pitpna,Scp2,Hadha,Acbd3,Gcdh
5_Member	GO Biological Processes	GO:0046395	carboxylic acid catabolic process	-15.5516	-12.3519	31/204	11364,11370,11409,12894,13167,13177,14661,14874,15107,15356,19299,20280,20524,52538,56174,56717,58810,78038,97212,102632,104776,108037,110208,110446,110460,110826,113868,212647,227095,231086,270076	Acadm,Acadvl,Acads,Cpt1a,Dbi,Eci1,Glud1,Gstz1,Hadh,Hmgcl,Abcd3,Scp2,Slc25a17,Acaa2,Nagk,Mtor,Akr1a1,Mccc2,Hadha,Acad11,Aldh6a1,Shmt2,Pgd,Acat1,Acat2,Etfb,Acaa1a,Aldh4a1,Hibch,Hadhb,Gcdh
5_Member	GO Biological Processes	GO:0044282	small molecule catabolic process	-15.4072	-12.2355	38/317	11364,11370,11409,12035,12039,12894,13167,13177,14661,14874,15107,15275,15356,19299,20280,20524,52538,55980,56174,56421,56717,57028,58810,78038,97212,102632,104776,108037,110208,110446,110460,110826,113868,212647,225913,227095,231086,270076	Acadm,Acadvl,Acads,Bcat1,Bckdha,Cpt1a,Dbi,Eci1,Glud1,Gstz1,Hadh,Hk1,Hmgcl,Abcd3,Scp2,Slc25a17,Acaa2,Impa1,Nagk,Pfkp,Mtor,Pdxp,Akr1a1,Mccc2,Hadha,Acad11,Aldh6a1,Shmt2,Pgd,Acat1,Acat2,Etfb,Acaa1a,Aldh4a1,Tkfc,Hibch,Hadhb,Gcdh
5_Member	KEGG Pathway	ko00280	Valine, leucine and isoleucine degradation	-13.9852	-10.9896	17/56	11364,11409,11669,12035,12039,15107,15356,52538,72039,78038,97212,104776,110446,110460,113868,227095,231086	Acadm,Acads,Aldh2,Bcat1,Bckdha,Hadh,Hmgcl,Acaa2,Mccc1,Mccc2,Hadha,Aldh6a1,Acat1,Acat2,Acaa1a,Hibch,Hadhb
5_Member	KEGG Pathway	mmu00280	Valine, leucine and isoleucine degradation	-13.7001	-10.7392	17/58	11364,11409,11669,12035,12039,15107,15356,52538,72039,78038,97212,104776,110446,110460,113868,227095,231086	Acadm,Acads,Aldh2,Bcat1,Bckdha,Hadh,Hmgcl,Acaa2,Mccc1,Mccc2,Hadha,Aldh6a1,Acat1,Acat2,Acaa1a,Hibch,Hadhb
5_Member	GO Biological Processes	GO:0072329	monocarboxylic acid catabolic process	-13.1531	-10.2086	22/117	11364,11370,11409,12894,13167,13177,15107,19299,20280,20524,52538,56717,58810,97212,102632,110208,110446,110460,110826,113868,231086,270076	Acadm,Acadvl,Acads,Cpt1a,Dbi,Eci1,Hadh,Abcd3,Scp2,Slc25a17,Acaa2,Mtor,Akr1a1,Hadha,Acad11,Pgd,Acat1,Acat2,Etfb,Acaa1a,Hadhb,Gcdh
5_Member	GO Biological Processes	GO:0009062	fatty acid catabolic process	-12.8078	-9.92333	20/97	11364,11370,11409,12894,13167,13177,15107,19299,20280,20524,52538,56717,97212,102632,110446,110460,110826,113868,231086,270076	Acadm,Acadvl,Acads,Cpt1a,Dbi,Eci1,Hadh,Abcd3,Scp2,Slc25a17,Acaa2,Mtor,Hadha,Acad11,Acat1,Acat2,Etfb,Acaa1a,Hadhb,Gcdh
5_Member	GO Biological Processes	GO:0006635	fatty acid beta-oxidation	-15.3765	-12.2312	20/73	11364,11370,11409,12894,13167,13177,15107,19299,20280,20524,52538,56717,97212,102632,110446,110460,110826,113868,231086,270076	Acadm,Acadvl,Acads,Cpt1a,Dbi,Eci1,Hadh,Abcd3,Scp2,Slc25a17,Acaa2,Mtor,Hadha,Acad11,Acat1,Acat2,Etfb,Acaa1a,Hadhb,Gcdh
5_Member	GO Biological Processes	GO:0034440	lipid oxidation	-11.2792	-8.5369	20/116	11364,11370,11409,12894,13167,13177,15107,19299,20280,20524,52538,56717,97212,102632,110446,110460,110826,113868,231086,270076	Acadm,Acadvl,Acads,Cpt1a,Dbi,Eci1,Hadh,Abcd3,Scp2,Slc25a17,Acaa2,Mtor,Hadha,Acad11,Acat1,Acat2,Etfb,Acaa1a,Hadhb,Gcdh
5_Member	KEGG Pathway	ko00071	Fatty acid degradation	-11.2175	-8.48513	14/49	11364,11370,11409,11669,12894,13177,15107,52538,97212,110446,110460,113868,231086,270076	Acadm,Acadvl,Acads,Aldh2,Cpt1a,Eci1,Hadh,Acaa2,Hadha,Acat1,Acat2,Acaa1a,Hadhb,Gcdh
5_Member	KEGG Pathway	mmu00071	Fatty acid degradation	-11.0844	-8.36184	14/50	11364,11370,11409,11669,12894,13177,15107,52538,97212,110446,110460,113868,231086,270076	Acadm,Acadvl,Acads,Aldh2,Cpt1a,Eci1,Hadh,Acaa2,Hadha,Acat1,Acat2,Acaa1a,Hadhb,Gcdh
5_Member	GO Biological Processes	GO:0019395	fatty acid oxidation	-11.8037	-9.01894	20/109	11364,11370,11409,12894,13167,13177,15107,19299,20280,20524,52538,56717,97212,102632,110446,110460,110826,113868,231086,270076	Acadm,Acadvl,Acads,Cpt1a,Dbi,Eci1,Hadh,Abcd3,Scp2,Slc25a17,Acaa2,Mtor,Hadha,Acad11,Acat1,Acat2,Etfb,Acaa1a,Hadhb,Gcdh
5_Member	WikiPathways	WP401	Mitochondrial LC-Fatty Acid Beta-Oxidation	-10.5871	-7.90148	9/16	11364,11370,11409,12894,13177,15107,20280,57279,97212	Acadm,Acadvl,Acads,Cpt1a,Eci1,Hadh,Scp2,Slc25a20,Hadha
5_Member	GO Biological Processes	GO:0032787	monocarboxylic acid metabolic process	-10.0534	-7.41799	44/605	11364,11370,11409,12894,13167,13177,13849,14979,15107,15275,17918,18293,18563,18597,19299,20280,20524,20848,26380,52538,56421,56717,57874,58810,66400,67103,68263,68738,76238,96979,97212,102632,108155,110208,110446,110460,110826,113868,216963,225913,231086,269951,270076,625249	Acadm,Acadvl,Acads,Cpt1a,Dbi,Eci1,Ephx1,H2-Ke6,Hadh,Hk1,Myo5a,Ogdh,Pcx,Pdha1,Abcd3,Scp2,Slc25a17,Stat3,Esrrb,Acaa2,Pfkp,Mtor,Hacd3,Akr1a1,Alkbh7,Ptgr1,Pdhb,Acss1,Grhpr,Ptges2,Hadha,Acad11,Ogt,Pgd,Acat1,Acat2,Etfb,Acaa1a,Git1,Tkfc,Hadhb,Idh2,Gcdh,Gpx4
5_Member	GO Molecular Functions	GO:0000062	fatty-acyl-CoA binding	-9.83154	-7.20392	10/25	11364,11370,11409,13167,15356,18738,20280,97212,170760,270076	Acadm,Acadvl,Acads,Dbi,Hmgcl,Pitpna,Scp2,Hadha,Acbd3,Gcdh
5_Member	GO Molecular Functions	GO:1901567	fatty acid derivative binding	-9.63013	-7.04671	10/26	11364,11370,11409,13167,15356,18738,20280,97212,170760,270076	Acadm,Acadvl,Acads,Dbi,Hmgcl,Pitpna,Scp2,Hadha,Acbd3,Gcdh
6_Summary	GO Biological Processes	GO:0006892	post-Golgi vesicle-mediated transport	-6.94723	-4.61281	14/99	11736,11765,11776,17918,18195,19325,20742,54214,66482,69940,70028,98710,99371,107338,65114	Ankfy1,Ap1g1,Ap3d1,Myo5a,Nsf,Rab10,Sptbn1,Golga4,Exoc2,Exoc1,Dop1b,Rabif,Arfgef2,Gbf1,Vps35
6_Member	GO Biological Processes	GO:0006892	post-Golgi vesicle-mediated transport	-6.94723	-4.61281	14/99	11736,11765,11776,17918,18195,19325,20742,54214,66482,69940,70028,98710,99371,107338	Ankfy1,Ap1g1,Ap3d1,Myo5a,Nsf,Rab10,Sptbn1,Golga4,Exoc2,Exoc1,Dop1b,Rabif,Arfgef2,Gbf1
6_Member	GO Biological Processes	GO:0006893	Golgi to plasma membrane transport	-3.18444	-1.42981	7/61	18195,19325,20742,54214,66482,69940,99371	Nsf,Rab10,Sptbn1,Golga4,Exoc2,Exoc1,Arfgef2
6_Member	GO Biological Processes	GO:0098876	vesicle-mediated transport to the plasma membrane	-2.5856	-0.95452	8/98	18195,19325,20742,54214,65114,66482,69940,99371	Nsf,Rab10,Sptbn1,Golga4,Vps35,Exoc2,Exoc1,Arfgef2
7_Summary	GO Biological Processes	GO:0010256	endomembrane system organization	-6.60459	-4.31157	30/431	11749,11776,11938,17918,19325,20742,20972,23943,26413,26903,27277,54198,56041,66508,68505,69162,70361,71732,76499,76707,77053,98732,99371,100986,107338,211401,226101,320714,338366,360013	Anxa6,Ap3d1,Atp2a2,Myo5a,Rab10,Sptbn1,Syngr1,Esyt1,Mapk1,Dysf,Golga5,Snx3,Uso1,Lamtor1,Vps51,Sec31a,Lman1,Vps11,Clasp2,Clasp1,Sun1,Rab3gap2,Arfgef2,Akap9,Gbf1,Mtss1,Myof,Trappc11,Mia3,Myo18a
7_Member	GO Biological Processes	GO:0010256	endomembrane system organization	-6.60459	-4.31157	30/431	11749,11776,11938,17918,19325,20742,20972,23943,26413,26903,27277,54198,56041,66508,68505,69162,70361,71732,76499,76707,77053,98732,99371,100986,107338,211401,226101,320714,338366,360013	Anxa6,Ap3d1,Atp2a2,Myo5a,Rab10,Sptbn1,Syngr1,Esyt1,Mapk1,Dysf,Golga5,Snx3,Uso1,Lamtor1,Vps51,Sec31a,Lman1,Vps11,Clasp2,Clasp1,Sun1,Rab3gap2,Arfgef2,Akap9,Gbf1,Mtss1,Myof,Trappc11,Mia3,Myo18a
7_Member	GO Biological Processes	GO:0007030	Golgi organization	-3.57826	-1.74278	11/127	26413,27277,56041,68505,70361,76499,76707,100986,107338,320714,360013	Mapk1,Golga5,Uso1,Vps51,Lman1,Clasp2,Clasp1,Akap9,Gbf1,Trappc11,Myo18a
8_Summary	GO Molecular Functions	GO:0016616	oxidoreductase activity, acting on the CH-OH group of donors, NAD or NADP as acceptor	-6.4079	-4.1592	16/143	14979,15107,17448,17449,20751,22235,28200,56043,58810,67103,71911,76238,97212,100198,110208,269951,11669,14661,226646,57028,225913	H2-Ke6,Hadh,Mdh2,Mdh1,Spr,Ugdh,Dhrs4,Akr1e1,Akr1a1,Ptgr1,Bdh1,Grhpr,Hadha,H6pd,Pgd,Idh2,Aldh2,Glud1,Ndufs2,Pdxp,Tkfc
8_Member	GO Molecular Functions	GO:0016616	oxidoreductase activity, acting on the CH-OH group of donors, NAD or NADP as acceptor	-6.4079	-4.1592	16/143	14979,15107,17448,17449,20751,22235,28200,56043,58810,67103,71911,76238,97212,100198,110208,269951	H2-Ke6,Hadh,Mdh2,Mdh1,Spr,Ugdh,Dhrs4,Akr1e1,Akr1a1,Ptgr1,Bdh1,Grhpr,Hadha,H6pd,Pgd,Idh2
8_Member	GO Molecular Functions	GO:0016614	oxidoreductase activity, acting on CH-OH group of donors	-6.04715	-3.83569	16/152	14979,15107,17448,17449,20751,22235,28200,56043,58810,67103,71911,76238,97212,100198,110208,269951	H2-Ke6,Hadh,Mdh2,Mdh1,Spr,Ugdh,Dhrs4,Akr1e1,Akr1a1,Ptgr1,Bdh1,Grhpr,Hadha,H6pd,Pgd,Idh2
8_Member	GO Molecular Functions	GO:0051287	NAD binding	-5.72976	-3.56078	10/61	11669,14661,14979,15107,17449,22235,76238,97212,226646,269951	Aldh2,Glud1,H2-Ke6,Hadh,Mdh1,Ugdh,Grhpr,Hadha,Ndufs2,Idh2
8_Member	GO Biological Processes	GO:0006081	cellular aldehyde metabolic process	-3.09924	-1.36092	7/63	11669,28200,57028,58810,76238,225913,269951	Aldh2,Dhrs4,Pdxp,Akr1a1,Grhpr,Tkfc,Idh2
9_Summary	KEGG Pathway	mmu00270	Cysteine and methionine metabolism	-6.3197	-4.07743	10/53	12035,13433,14854,17448,17449,22117,66711,66902,67873,107869	Bcat1,Dnmt1,Gss,Mdh2,Mdh1,Tst,Sbds,Mtap,Mri1,Cth
9_Member	KEGG Pathway	mmu00270	Cysteine and methionine metabolism	-6.3197	-4.07743	10/53	12035,13433,14854,17448,17449,22117,66711,66902,67873,107869	Bcat1,Dnmt1,Gss,Mdh2,Mdh1,Tst,Sbds,Mtap,Mri1,Cth
9_Member	KEGG Pathway	ko00270	Cysteine and methionine metabolism	-5.72	-3.5537	9/48	12035,13433,14854,17448,17449,22117,66902,67873,107869	Bcat1,Dnmt1,Gss,Mdh2,Mdh1,Tst,Mtap,Mri1,Cth
9_Member	Reactome Gene Sets	R-MMU-1614635	Sulfur amino acid metabolism	-2.61204	-0.974214	4/24	22117,66902,67873,107869	Tst,Mtap,Mri1,Cth
9_Member	GO Biological Processes	GO:0000097	sulfur amino acid biosynthetic process	-2.28842	-0.73281	3/15	66902,67873,107869	Mtap,Mri1,Cth
9_Member	GO Biological Processes	GO:0000096	sulfur amino acid metabolic process	-2.14861	-0.628319	4/32	22117,66902,67873,107869	Tst,Mtap,Mri1,Cth
10_Summary	KEGG Pathway	mmu_M00011	Citrate cycle, second carbon oxidation, 2-oxoglutarate => oxaloacetate	-18.3314	-14.8007	6/14	17448,17449,18293,20917,66945,67680,269951,14874,18597,68263,64602,18563,11898,14645,14661,52633,56454,76238,108037,212647,229905,11364,11409,15275,56421,68738,97212,100198,100678,104776,107272,110208,110446,110460,225913,227095,107869	Mdh2,Mdh1,Ogdh,Suclg2,Sdha,Sdhb,Idh2,Gstz1,Pdha1,Pdhb,Ireb2,Pcx,Ass1,Glul,Glud1,Nit2,Aldh18a1,Grhpr,Shmt2,Aldh4a1,Kyat3,Acadm,Acads,Hk1,Pfkp,Acss1,Hadha,H6pd,Psph,Aldh6a1,Psat1,Pgd,Acat1,Acat2,Tkfc,Hibch,Cth
10_Member	KEGG Pathway	mmu_M00011	Citrate cycle, second carbon oxidation, 2-oxoglutarate => oxaloacetate	-6.30643	-4.0705	6/14	17448,17449,18293,20917,66945,67680	Mdh2,Mdh1,Ogdh,Suclg2,Sdha,Sdhb
10_Member	GO Biological Processes	GO:0006105	succinate metabolic process	-3.33973	-1.56162	3/7	20917,66945,67680	Suclg2,Sdha,Sdhb
10_Member	Reactome Gene Sets	R-MMU-71403	Citric acid cycle (TCA cycle)	-5.11211	-3.04538	6/21	17448,18293,20917,66945,67680,269951	Mdh2,Ogdh,Suclg2,Sdha,Sdhb,Idh2
10_Member	Reactome Gene Sets	R-MMU-71406	Pyruvate metabolism and Citric Acid (TCA) cycle	-5.5643	-3.41121	9/50	14874,17448,18293,18597,20917,66945,67680,68263,269951	Gstz1,Mdh2,Ogdh,Pdha1,Suclg2,Sdha,Sdhb,Pdhb,Idh2
10_Member	KEGG Pathway	mmu_M00009	Citrate cycle (TCA cycle, Krebs cycle)	-5.94999	-3.75315	7/24	17448,17449,18293,20917,66945,67680,269951	Mdh2,Mdh1,Ogdh,Suclg2,Sdha,Sdhb,Idh2
10_Member	KEGG Pathway	M00009	Citrate cycle (TCA cycle, Krebs cycle)	-5.94999	-3.75315	7/24	17448,17449,18293,20917,66945,67680,269951	Mdh2,Mdh1,Ogdh,Suclg2,Sdha,Sdhb,Idh2
10_Member	KEGG Pathway	M00011	Citrate cycle, second carbon oxidation, 2-oxoglutarate => oxaloacetate	-6.30643	-4.0705	6/14	17448,17449,18293,20917,66945,67680	Mdh2,Mdh1,Ogdh,Suclg2,Sdha,Sdhb
10_Member	GO Biological Processes	GO:0006099	tricarboxylic acid cycle	-8.60234	-6.10159	10/32	17448,17449,18293,18597,20917,64602,66945,67680,68263,269951	Mdh2,Mdh1,Ogdh,Pdha1,Suclg2,Ireb2,Sdha,Sdhb,Pdhb,Idh2
10_Member	KEGG Pathway	ko00020	Citrate cycle (TCA cycle)	-8.60234	-6.10159	10/32	17448,17449,18293,18563,18597,20917,66945,67680,68263,269951	Mdh2,Mdh1,Ogdh,Pcx,Pdha1,Suclg2,Sdha,Sdhb,Pdhb,Idh2
10_Member	WikiPathways	WP434	TCA Cycle	-8.75563	-6.23108	10/31	17448,17449,18293,18563,18597,20917,66945,67680,68263,269951	Mdh2,Mdh1,Ogdh,Pcx,Pdha1,Suclg2,Sdha,Sdhb,Pdhb,Idh2
10_Member	GO Biological Processes	GO:0043648	dicarboxylic acid metabolic process	-9.65957	-7.06192	16/86	11898,14645,14661,17448,17449,18293,18563,20917,52633,56454,66945,67680,76238,108037,212647,229905	Ass1,Glul,Glud1,Mdh2,Mdh1,Ogdh,Pcx,Suclg2,Nit2,Aldh18a1,Sdha,Sdhb,Grhpr,Shmt2,Aldh4a1,Kyat3
10_Member	KEGG Pathway	mmu01200	Carbon metabolism	-18.3314	-14.8007	27/118	11364,11409,14661,15275,17448,17449,18293,18563,18597,20917,56421,66945,67680,68263,68738,97212,100198,100678,104776,107272,108037,110208,110446,110460,225913,227095,269951	Acadm,Acads,Glud1,Hk1,Mdh2,Mdh1,Ogdh,Pcx,Pdha1,Suclg2,Pfkp,Sdha,Sdhb,Pdhb,Acss1,Hadha,H6pd,Psph,Aldh6a1,Psat1,Shmt2,Pgd,Acat1,Acat2,Tkfc,Hibch,Idh2
10_Member	KEGG Pathway	ko01200	Carbon metabolism	-18.3314	-14.8007	27/118	11364,11409,14661,15275,17448,17449,18293,18563,18597,20917,56421,66945,67680,68263,68738,97212,100198,100678,104776,107272,108037,110208,110446,110460,225913,227095,269951	Acadm,Acads,Glud1,Hk1,Mdh2,Mdh1,Ogdh,Pcx,Pdha1,Suclg2,Pfkp,Sdha,Sdhb,Pdhb,Acss1,Hadha,H6pd,Psph,Aldh6a1,Psat1,Shmt2,Pgd,Acat1,Acat2,Tkfc,Hibch,Idh2
10_Member	KEGG Pathway	mmu00020	Citrate cycle (TCA cycle)	-8.37362	-5.91163	11/43	17448,17449,18293,18563,18597,20917,66945,67680,68263,107869,269951	Mdh2,Mdh1,Ogdh,Pcx,Pdha1,Suclg2,Sdha,Sdhb,Pdhb,Cth,Idh2
11_Summary	GO Biological Processes	GO:0006839	mitochondrial transport	-12.5396	-9.69523	19/205	11739,11740,18408,20848,22117,26926,28080,30954,52538,56330,65114,66400,67184,68653,69597,69773,74143,94280,223696,219158,227197,56717,22042,223601,320528,14004,14467,15185,15356,22241,27395,54405,66108,66117,66271,66694,66916,67811,68342,74142,74148,76559,83945,104130,108155,108888,329015,595136	Slc25a4,Slc25a5,Slc25a15,Stat3,Tst,Aifm1,Atp5o,Siva1,Acaa2,Pdcd5,Vps35,Alkbh7,Ndufa13,Samm50,Afg3l2,Timm29,Opa1,Sfxn3,Tomm22,Ccar2,Ndufs1,Mtor,Tfrc,Cyrib,Vps13c,Chchd2,Nipsnap2,Hdac6,Hmgcl,Ulk1,Mrpl15,Ndufa1,Ndufa9,Fmc1,Tmem126a,Uqcrfs1,Ndufb7,Poldip2,Ndufb10,Lonp1,Cluh,Atg2b,Dnaja3,Ndufb11,Ogt,Atad3a,Atg2a,Ndufs5
11_Member	GO Biological Processes	GO:0006839	mitochondrial transport	-6.20062	-3.98015	19/205	11739,11740,18408,20848,22117,26926,28080,30954,52538,56330,65114,66400,67184,68653,69597,69773,74143,94280,223696	Slc25a4,Slc25a5,Slc25a15,Stat3,Tst,Aifm1,Atp5o,Siva1,Acaa2,Pdcd5,Vps35,Alkbh7,Ndufa13,Samm50,Afg3l2,Timm29,Opa1,Sfxn3,Tomm22
11_Member	GO Biological Processes	GO:0007006	mitochondrial membrane organization	-5.96333	-3.76071	13/102	11739,11740,20848,30954,52538,56330,66400,67184,68653,69597,69773,74143,223696	Slc25a4,Slc25a5,Stat3,Siva1,Acaa2,Pdcd5,Alkbh7,Ndufa13,Samm50,Afg3l2,Timm29,Opa1,Tomm22
11_Member	GO Biological Processes	GO:0008637	apoptotic mitochondrial changes	-3.37756	-1.58988	10/113	11739,11740,26926,30954,52538,56330,65114,74143,219158,227197	Slc25a4,Slc25a5,Aifm1,Siva1,Acaa2,Pdcd5,Vps35,Opa1,Ccar2,Ndufs1
11_Member	GO Biological Processes	GO:0090559	regulation of membrane permeability	-2.86306	-1.17567	7/69	11739,11740,20848,30954,52538,56717,66400	Slc25a4,Slc25a5,Stat3,Siva1,Acaa2,Mtor,Alkbh7
11_Member	GO Biological Processes	GO:0046902	regulation of mitochondrial membrane permeability	-2.72718	-1.06654	6/54	11739,11740,20848,30954,52538,66400	Slc25a4,Slc25a5,Stat3,Siva1,Acaa2,Alkbh7
11_Member	GO Biological Processes	GO:0010821	regulation of mitochondrion organization	-2.47086	-0.873921	9/125	11740,22042,30954,52538,56330,65114,74143,223601,320528	Slc25a5,Tfrc,Siva1,Acaa2,Pdcd5,Vps35,Opa1,Cyrib,Vps13c
11_Member	GO Biological Processes	GO:0007005	mitochondrion organization	-12.5396	-9.69523	43/489	11739,11740,14004,14467,15185,15356,20848,22042,22241,26926,27395,30954,52538,54405,56330,65114,66108,66117,66271,66400,66694,66916,67184,67811,68342,68653,69597,69773,74142,74143,74148,76559,83945,104130,108155,108888,219158,223601,223696,227197,320528,329015,595136	Slc25a4,Slc25a5,Chchd2,Nipsnap2,Hdac6,Hmgcl,Stat3,Tfrc,Ulk1,Aifm1,Mrpl15,Siva1,Acaa2,Ndufa1,Pdcd5,Vps35,Ndufa9,Fmc1,Tmem126a,Alkbh7,Uqcrfs1,Ndufb7,Ndufa13,Poldip2,Ndufb10,Samm50,Afg3l2,Timm29,Lonp1,Opa1,Cluh,Atg2b,Dnaja3,Ndufb11,Ogt,Atad3a,Ccar2,Cyrib,Tomm22,Ndufs1,Vps13c,Atg2a,Ndufs5
12_Summary	GO Biological Processes	GO:0016482	cytosolic transport	-5.85862	-3.67033	16/157	11736,11765,26413,54198,54399,56418,65114,66713,67804,68449,68505,70028,71732,104831,107338,216344,11776,19325,66508,67166,80743	Ankfy1,Ap1g1,Mapk1,Snx3,Bet1l,Ykt6,Vps35,Actr2,Snx2,Tbc1d10b,Vps51,Dop1b,Vps11,Ptpn23,Gbf1,Rab21,Ap3d1,Rab10,Lamtor1,Arl8b,Vps16
12_Member	GO Biological Processes	GO:0016482	cytosolic transport	-5.85862	-3.67033	16/157	11736,11765,26413,54198,54399,56418,65114,66713,67804,68449,68505,70028,71732,104831,107338,216344	Ankfy1,Ap1g1,Mapk1,Snx3,Bet1l,Ykt6,Vps35,Actr2,Snx2,Tbc1d10b,Vps51,Dop1b,Vps11,Ptpn23,Gbf1,Rab21
12_Member	GO Biological Processes	GO:0042147	retrograde transport, endosome to Golgi	-3.75252	-1.87502	9/83	11736,54198,54399,56418,65114,67804,68449,68505,107338	Ankfy1,Snx3,Bet1l,Ykt6,Vps35,Snx2,Tbc1d10b,Vps51,Gbf1
12_Member	GO Biological Processes	GO:0016197	endosomal transport	-3.31497	-1.54013	15/229	11736,11776,19325,54198,54399,56418,65114,66508,67166,67804,68449,68505,80743,104831,107338	Ankfy1,Ap3d1,Rab10,Snx3,Bet1l,Ykt6,Vps35,Lamtor1,Arl8b,Snx2,Tbc1d10b,Vps51,Vps16,Ptpn23,Gbf1
13_Summary	GO Biological Processes	GO:0031114	regulation of microtubule depolymerization	-8.8517	-6.31474	8/38	15185,17754,17755,26903,76499,76707,216965,227634,75786,229589,16554,17758,26921,66711,74143,218035,13205,56330,67166,11518,11740,12933,13169,13427,13433,16852,16854,18643,19055,20333,20352,20615,20742,22042,22240,22241,23950,23999,52538,53328,56275,65114,75339,223601,225115,233977,235041,14852,18195,22388,57028,80743,171580,11783,13804,26926,67490,76559,77006,107338,320528,329015	Hdac6,Map1a,Map1b,Dysf,Clasp2,Clasp1,Taok1,Camsap1,Ckap5,Prune1,Kif13b,Map4,Map4k4,Sbds,Opa1,Vps41,Ddx3x,Pdcd5,Arl8b,Add1,Slc25a5,Crmp1,Dbnl,Dync1i2,Dnmt1,Lgals1,Lgals3,Pfn1,Ppp3ca,Sec22b,Sema4b,Snapin,Sptbn1,Tfrc,Dpysl3,Ulk1,Dnajb6,Twf2,Acaa2,Pgrmc1,Rbm14,Vps35,Mphosph8,Cyrib,Svil,Ppfia1,Kank2,Gspt1,Nsf,Wdr1,Pdxp,Vps16,Mical1,Apaf1,Endog,Aifm1,Ufl1,Atg2b,Ddrgk1,Gbf1,Vps13c,Atg2a
13_Member	GO Biological Processes	GO:0031114	regulation of microtubule depolymerization	-5.54473	-3.40445	8/38	15185,17754,17755,26903,76499,76707,216965,227634	Hdac6,Map1a,Map1b,Dysf,Clasp2,Clasp1,Taok1,Camsap1
13_Member	GO Biological Processes	GO:0031113	regulation of microtubule polymerization	-2.04786	-0.557461	5/53	17755,75786,76499,227634,229589	Map1b,Ckap5,Clasp2,Camsap1,Prune1
13_Member	GO Molecular Functions	GO:0008017	microtubule binding	-2.25653	-0.707004	14/266	15185,16554,17754,17755,17758,26903,26921,66711,74143,75786,76499,76707,218035,227634	Hdac6,Kif13b,Map1a,Map1b,Map4,Dysf,Map4k4,Sbds,Opa1,Ckap5,Clasp2,Clasp1,Vps41,Camsap1
13_Member	GO Biological Processes	GO:0070507	regulation of microtubule cytoskeleton organization	-2.3838	-0.803175	10/153	15185,17754,17755,26903,75786,76499,76707,216965,227634,229589	Hdac6,Map1a,Map1b,Dysf,Ckap5,Clasp2,Clasp1,Taok1,Camsap1,Prune1
13_Member	GO Molecular Functions	GO:0015631	tubulin binding	-2.70716	-1.04985	19/373	13205,15185,16554,17754,17755,17758,26903,26921,56330,66711,67166,74143,75786,76499,76707,216965,218035,227634,229589	Ddx3x,Hdac6,Kif13b,Map1a,Map1b,Map4,Dysf,Map4k4,Pdcd5,Sbds,Arl8b,Opa1,Ckap5,Clasp2,Clasp1,Taok1,Vps41,Camsap1,Prune1
13_Member	GO Biological Processes	GO:0031109	microtubule polymerization or depolymerization	-3.08724	-1.35319	10/123	15185,17754,17755,26903,75786,76499,76707,216965,227634,229589	Hdac6,Map1a,Map1b,Dysf,Ckap5,Clasp2,Clasp1,Taok1,Camsap1,Prune1
13_Member	GO Biological Processes	GO:0031110	regulation of microtubule polymerization or depolymerization	-4.19891	-2.23134	10/90	15185,17754,17755,26903,75786,76499,76707,216965,227634,229589	Hdac6,Map1a,Map1b,Dysf,Ckap5,Clasp2,Clasp1,Taok1,Camsap1,Prune1
13_Member	GO Biological Processes	GO:0007019	microtubule depolymerization	-4.30495	-2.31296	8/55	15185,17754,17755,26903,76499,76707,216965,227634	Hdac6,Map1a,Map1b,Dysf,Clasp2,Clasp1,Taok1,Camsap1
13_Member	GO Biological Processes	GO:0031111	negative regulation of microtubule polymerization or depolymerization	-4.7494	-2.71205	8/48	15185,17754,17755,26903,76499,76707,216965,227634	Hdac6,Map1a,Map1b,Dysf,Clasp2,Clasp1,Taok1,Camsap1
13_Member	GO Biological Processes	GO:0051129	negative regulation of cellular component organization	-5.36852	-3.24842	40/764	11518,11740,12933,13169,13205,13427,13433,15185,16852,16854,17754,17755,17758,18643,19055,20333,20352,20615,20742,22042,22240,22241,23950,23999,26903,26921,52538,53328,56275,65114,74143,75339,76499,76707,216965,223601,225115,227634,233977,235041	Add1,Slc25a5,Crmp1,Dbnl,Ddx3x,Dync1i2,Dnmt1,Hdac6,Lgals1,Lgals3,Map1a,Map1b,Map4,Pfn1,Ppp3ca,Sec22b,Sema4b,Snapin,Sptbn1,Tfrc,Dpysl3,Ulk1,Dnajb6,Twf2,Dysf,Map4k4,Acaa2,Pgrmc1,Rbm14,Vps35,Opa1,Mphosph8,Clasp2,Clasp1,Taok1,Cyrib,Svil,Camsap1,Ppfia1,Kank2
13_Member	GO Biological Processes	GO:0010639	negative regulation of organelle organization	-5.56125	-3.41075	25/361	11518,11740,13169,15185,17754,17755,17758,18643,20333,20742,22042,23999,26903,52538,56275,74143,75339,76499,76707,216965,223601,225115,227634,233977,235041	Add1,Slc25a5,Dbnl,Hdac6,Map1a,Map1b,Map4,Pfn1,Sec22b,Sptbn1,Tfrc,Twf2,Dysf,Acaa2,Rbm14,Opa1,Mphosph8,Clasp2,Clasp1,Taok1,Cyrib,Svil,Camsap1,Ppfia1,Kank2
13_Member	GO Biological Processes	GO:0007026	negative regulation of microtubule depolymerization	-5.83467	-3.64919	8/35	15185,17754,17755,26903,76499,76707,216965,227634	Hdac6,Map1a,Map1b,Dysf,Clasp2,Clasp1,Taok1,Camsap1
13_Member	GO Biological Processes	GO:1902904	negative regulation of supramolecular fiber organization	-6.61261	-4.31598	18/174	11518,13169,15185,17754,17755,18643,20742,23999,26903,75339,76499,76707,216965,223601,225115,227634,233977,235041	Add1,Dbnl,Hdac6,Map1a,Map1b,Pfn1,Sptbn1,Twf2,Dysf,Mphosph8,Clasp2,Clasp1,Taok1,Cyrib,Svil,Camsap1,Ppfia1,Kank2
13_Member	GO Biological Processes	GO:0032984	protein-containing complex disassembly	-7.07498	-4.7326	21/218	11518,13169,14852,15185,17754,17755,18195,20615,20742,22388,23999,26903,57028,75339,76499,76707,80743,171580,216965,225115,227634	Add1,Dbnl,Gspt1,Hdac6,Map1a,Map1b,Nsf,Snapin,Sptbn1,Wdr1,Twf2,Dysf,Pdxp,Mphosph8,Clasp2,Clasp1,Vps16,Mical1,Taok1,Svil,Camsap1
13_Member	GO Biological Processes	GO:0043242	negative regulation of protein-containing complex disassembly	-7.29831	-4.91372	14/93	11518,13169,15185,17754,17755,20742,23999,26903,75339,76499,76707,216965,225115,227634	Add1,Dbnl,Hdac6,Map1a,Map1b,Sptbn1,Twf2,Dysf,Mphosph8,Clasp2,Clasp1,Taok1,Svil,Camsap1
13_Member	GO Biological Processes	GO:0051494	negative regulation of cytoskeleton organization	-7.32271	-4.93367	19/174	11518,13169,15185,17754,17755,18643,20742,23999,26903,56275,75339,76499,76707,216965,223601,225115,227634,233977,235041	Add1,Dbnl,Hdac6,Map1a,Map1b,Pfn1,Sptbn1,Twf2,Dysf,Rbm14,Mphosph8,Clasp2,Clasp1,Taok1,Cyrib,Svil,Camsap1,Ppfia1,Kank2
13_Member	GO Biological Processes	GO:0043244	regulation of protein-containing complex disassembly	-7.73028	-5.31826	17/131	11518,13169,14852,15185,17754,17755,20742,22388,23999,26903,57028,75339,76499,76707,216965,225115,227634	Add1,Dbnl,Gspt1,Hdac6,Map1a,Map1b,Sptbn1,Wdr1,Twf2,Dysf,Pdxp,Mphosph8,Clasp2,Clasp1,Taok1,Svil,Camsap1
13_Member	GO Biological Processes	GO:0051261	protein depolymerization	-7.93614	-5.50481	17/127	11518,13169,15185,17754,17755,20742,22388,23999,26903,57028,75339,76499,76707,171580,216965,225115,227634	Add1,Dbnl,Hdac6,Map1a,Map1b,Sptbn1,Wdr1,Twf2,Dysf,Pdxp,Mphosph8,Clasp2,Clasp1,Mical1,Taok1,Svil,Camsap1
13_Member	GO Biological Processes	GO:1901880	negative regulation of protein depolymerization	-7.9512	-5.51491	14/83	11518,13169,15185,17754,17755,20742,23999,26903,75339,76499,76707,216965,225115,227634	Add1,Dbnl,Hdac6,Map1a,Map1b,Sptbn1,Twf2,Dysf,Mphosph8,Clasp2,Clasp1,Taok1,Svil,Camsap1
13_Member	GO Biological Processes	GO:0043624	cellular protein complex disassembly	-8.4877	-6.00951	19/148	11518,13169,14852,15185,17754,17755,18195,20742,22388,23999,26903,57028,75339,76499,76707,171580,216965,225115,227634	Add1,Dbnl,Gspt1,Hdac6,Map1a,Map1b,Nsf,Sptbn1,Wdr1,Twf2,Dysf,Pdxp,Mphosph8,Clasp2,Clasp1,Mical1,Taok1,Svil,Camsap1
13_Member	GO Biological Processes	GO:0022411	cellular component disassembly	-8.7587	-6.23108	32/388	11518,11783,13169,13804,14852,15185,17754,17755,18195,20615,20742,22241,22388,23999,26903,26921,26926,57028,67490,75339,76499,76559,76707,77006,80743,107338,171580,216965,225115,227634,320528,329015	Add1,Apaf1,Dbnl,Endog,Gspt1,Hdac6,Map1a,Map1b,Nsf,Snapin,Sptbn1,Ulk1,Wdr1,Twf2,Dysf,Map4k4,Aifm1,Pdxp,Ufl1,Mphosph8,Clasp2,Atg2b,Clasp1,Ddrgk1,Vps16,Gbf1,Mical1,Taok1,Svil,Camsap1,Vps13c,Atg2a
13_Member	GO Biological Processes	GO:1901879	regulation of protein depolymerization	-8.8517	-6.31474	16/97	11518,13169,15185,17754,17755,20742,22388,23999,26903,57028,75339,76499,76707,216965,225115,227634	Add1,Dbnl,Hdac6,Map1a,Map1b,Sptbn1,Wdr1,Twf2,Dysf,Pdxp,Mphosph8,Clasp2,Clasp1,Taok1,Svil,Camsap1
14_Summary	GO Biological Processes	GO:0007033	vacuole organization	-5.11522	-3.04538	16/179	15212,20333,20615,22241,56717,65114,66508,69668,71732,74302,76559,80743,98732,214585,233724,329015,17754,20751	Hexb,Sec22b,Snapin,Ulk1,Mtor,Vps35,Lamtor1,Ccdc115,Vps11,Mtmr3,Atg2b,Vps16,Rab3gap2,Spg11,Tmem41b,Atg2a,Map1a,Spr
14_Member	GO Biological Processes	GO:0007033	vacuole organization	-5.11522	-3.04538	16/179	15212,20333,20615,22241,56717,65114,66508,69668,71732,74302,76559,80743,98732,214585,233724,329015	Hexb,Sec22b,Snapin,Ulk1,Mtor,Vps35,Lamtor1,Ccdc115,Vps11,Mtmr3,Atg2b,Vps16,Rab3gap2,Spg11,Tmem41b,Atg2a
14_Member	GO Biological Processes	GO:0050882	voluntary musculoskeletal movement	-4.41302	-2.41561	4/9	17754,20751,56717,65114	Map1a,Spr,Mtor,Vps35
14_Member	GO Biological Processes	GO:0007040	lysosome organization	-2.65204	-1.00782	7/75	15212,20615,56717,65114,66508,69668,214585	Hexb,Snapin,Mtor,Vps35,Lamtor1,Ccdc115,Spg11
14_Member	GO Biological Processes	GO:0080171	lytic vacuole organization	-2.65204	-1.00782	7/75	15212,20615,56717,65114,66508,69668,214585	Hexb,Snapin,Mtor,Vps35,Lamtor1,Ccdc115,Spg11
15_Summary	GO Molecular Functions	GO:0051020	GTPase binding	-4.68636	-2.65099	21/307	11736,11765,17913,17918,18195,18582,18643,20742,22241,27277,54214,66482,66508,98732,105148,171580,216963,217866,223601,226432,229707	Ankfy1,Ap1g1,Myo1c,Myo5a,Nsf,Pde6d,Pfn1,Sptbn1,Ulk1,Golga5,Golga4,Exoc2,Lamtor1,Rab3gap2,Iars,Mical1,Git1,Cdc42bpb,Cyrib,Ipo9,Strip1
15_Member	GO Molecular Functions	GO:0051020	GTPase binding	-4.68636	-2.65099	21/307	11736,11765,17913,17918,18195,18582,18643,20742,22241,27277,54214,66482,66508,98732,105148,171580,216963,217866,223601,226432,229707	Ankfy1,Ap1g1,Myo1c,Myo5a,Nsf,Pde6d,Pfn1,Sptbn1,Ulk1,Golga5,Golga4,Exoc2,Lamtor1,Rab3gap2,Iars,Mical1,Git1,Cdc42bpb,Cyrib,Ipo9,Strip1
15_Member	GO Molecular Functions	GO:0031267	small GTPase binding	-3.95921	-2.03976	18/270	11736,11765,17913,17918,18195,18582,18643,22241,27277,54214,66482,98732,171580,216963,217866,223601,226432,229707	Ankfy1,Ap1g1,Myo1c,Myo5a,Nsf,Pde6d,Pfn1,Ulk1,Golga5,Golga4,Exoc2,Rab3gap2,Mical1,Git1,Cdc42bpb,Cyrib,Ipo9,Strip1
16_Summary	GO Biological Processes	GO:1901361	organic cyclic compound catabolic process	-4.32572	-2.33192	26/453	11783,11792,12933,13207,13804,14852,14874,15254,17149,22240,23879,26926,56190,56717,57028,66911,71169,71207,76936,104776,109778,110446,113868,214133,225929,232791,13849	Apaf1,Apex1,Crmp1,Ddx5,Endog,Gspt1,Gstz1,Hint1,Magoh,Dpysl3,Fxr2,Aifm1,Rbm38,Mtor,Pdxp,Nudt16l1,Nbas,Nudt4,Hnrnpm,Aldh6a1,Blvra,Acat1,Acaa1a,Tet2,Patl1,Cnot3,Ephx1
16_Member	GO Biological Processes	GO:1901361	organic cyclic compound catabolic process	-4.32572	-2.33192	26/453	11783,11792,12933,13207,13804,14852,14874,15254,17149,22240,23879,26926,56190,56717,57028,66911,71169,71207,76936,104776,109778,110446,113868,214133,225929,232791	Apaf1,Apex1,Crmp1,Ddx5,Endog,Gspt1,Gstz1,Hint1,Magoh,Dpysl3,Fxr2,Aifm1,Rbm38,Mtor,Pdxp,Nudt16l1,Nbas,Nudt4,Hnrnpm,Aldh6a1,Blvra,Acat1,Acaa1a,Tet2,Patl1,Cnot3
16_Member	GO Biological Processes	GO:0044270	cellular nitrogen compound catabolic process	-4.23599	-2.26142	24/406	11783,11792,12933,13207,13804,14852,15254,17149,22240,23879,26926,56190,56717,57028,66911,71169,71207,76936,104776,109778,110446,214133,225929,232791	Apaf1,Apex1,Crmp1,Ddx5,Endog,Gspt1,Hint1,Magoh,Dpysl3,Fxr2,Aifm1,Rbm38,Mtor,Pdxp,Nudt16l1,Nbas,Nudt4,Hnrnpm,Aldh6a1,Blvra,Acat1,Tet2,Patl1,Cnot3
16_Member	GO Biological Processes	GO:0046700	heterocycle catabolic process	-4.21928	-2.24831	24/407	11783,11792,12933,13207,13804,14852,15254,17149,22240,23879,26926,56190,56717,57028,66911,71169,71207,76936,104776,109778,110446,214133,225929,232791	Apaf1,Apex1,Crmp1,Ddx5,Endog,Gspt1,Hint1,Magoh,Dpysl3,Fxr2,Aifm1,Rbm38,Mtor,Pdxp,Nudt16l1,Nbas,Nudt4,Hnrnpm,Aldh6a1,Blvra,Acat1,Tet2,Patl1,Cnot3
16_Member	GO Biological Processes	GO:0019439	aromatic compound catabolic process	-3.9922	-2.06664	24/421	11783,11792,13207,13804,13849,14852,14874,15254,17149,23879,26926,56190,56717,57028,66911,71169,71207,76936,109778,110446,113868,214133,225929,232791	Apaf1,Apex1,Ddx5,Endog,Ephx1,Gspt1,Gstz1,Hint1,Magoh,Fxr2,Aifm1,Rbm38,Mtor,Pdxp,Nudt16l1,Nbas,Nudt4,Hnrnpm,Blvra,Acat1,Acaa1a,Tet2,Patl1,Cnot3
16_Member	GO Biological Processes	GO:0034655	nucleobase-containing compound catabolic process	-2.33584	-0.768915	18/374	11783,11792,13207,13804,14852,15254,17149,23879,26926,56190,56717,66911,71169,71207,76936,110446,225929,232791	Apaf1,Apex1,Ddx5,Endog,Gspt1,Hint1,Magoh,Fxr2,Aifm1,Rbm38,Mtor,Nudt16l1,Nbas,Nudt4,Hnrnpm,Acat1,Patl1,Cnot3
16_Member	GO Biological Processes	GO:0006402	mRNA catabolic process	-2.10975	-0.601148	12/221	11792,13207,14852,17149,23879,56190,56717,66911,71169,76936,225929,232791	Apex1,Ddx5,Gspt1,Magoh,Fxr2,Rbm38,Mtor,Nudt16l1,Nbas,Hnrnpm,Patl1,Cnot3
17_Summary	GO Molecular Functions	GO:0050633	acetyl-CoA C-myristoyltransferase activity	-9.7959	-7.18509	3/4	20280,113868,231086,52538,110446,110460,97212	Scp2,Acaa1a,Hadhb,Acaa2,Acat1,Acat2,Hadha
17_Member	GO Molecular Functions	GO:0050633	acetyl-CoA C-myristoyltransferase activity	-4.25809	-2.27322	3/4	20280,113868,231086	Scp2,Acaa1a,Hadhb
17_Member	GO Molecular Functions	GO:0016453	C-acetyltransferase activity	-4.95254	-2.89895	4/7	52538,110446,110460,113868	Acaa2,Acat1,Acat2,Acaa1a
17_Member	GO Molecular Functions	GO:0019107	myristoyltransferase activity	-2.69771	-1.04288	3/11	20280,113868,231086	Scp2,Acaa1a,Hadhb
17_Member	GO Molecular Functions	GO:0016408	C-acyltransferase activity	-6.23913	-4.00945	7/22	20280,52538,97212,110446,110460,113868,231086	Scp2,Acaa2,Hadha,Acat1,Acat2,Acaa1a,Hadhb
17_Member	GO Molecular Functions	GO:0003988	acetyl-CoA C-acyltransferase activity	-9.7959	-7.18509	7/9	20280,52538,97212,110446,110460,113868,231086	Scp2,Acaa2,Hadha,Acat1,Acat2,Acaa1a,Hadhb
17_Member	GO Molecular Functions	GO:0003985	acetyl-CoA C-acetyltransferase activity	-5.31211	-3.21276	4/6	52538,110446,110460,113868	Acaa2,Acat1,Acat2,Acaa1a
18_Summary	GO Biological Processes	GO:0008064	regulation of actin polymerization or depolymerization	-7.22449	-4.85591	15/191	11518,13169,17913,18643,20742,22388,23897,23999,56717,57028,66713,75339,78757,223601,225115,13205,15185,22241,65114,13433,17755,26413,30954,52206,53890,56330,56399,59047,70361,74143,75786,98732,108155,109331,211401,218952,235072,13690,14268,18632,20352,54214,74370,76499,99152,216344,16854,22042,22240,23996,26921,76707,76467,70497,216965,233977,235041,171580,17754,26903,227634,229589,18000,625249,…	Add1,Dbnl,Myo1c,Pfn1,Sptbn1,Wdr1,Hax1,Twf2,Mtor,Pdxp,Actr2,Mphosph8,Rictor,Cyrib,Svil,Ddx3x,Hdac6,Ulk1,Vps35,Dnmt1,Map1b,Mapk1,Siva1,Anapc4,Sart3,Pdcd5,Akap8,Pnkp,Lman1,Opa1,Ckap5,Rab3gap2,Ogt,Rnf20,Mtss1,Fermt2,Septin7,Eif4g2,Fn1,Pex11b,Sema4b,Golga4,Rptor,Clasp2,Anapc2,Rab21,Lgals3,Tfrc,Dpysl3,Psmc4,Map4k4,Clasp1,Msrb2,Arhgap17,Taok1,Ppfia1,Kank2,Mical1,Map1a,Dysf,Camsap1,Prune1,Septin2,Gpx4,Nc…
18_Member	GO Biological Processes	GO:0008064	regulation of actin polymerization or depolymerization	-4.17645	-2.21394	15/191	11518,13169,17913,18643,20742,22388,23897,23999,56717,57028,66713,75339,78757,223601,225115	Add1,Dbnl,Myo1c,Pfn1,Sptbn1,Wdr1,Hax1,Twf2,Mtor,Pdxp,Actr2,Mphosph8,Rictor,Cyrib,Svil
18_Member	GO Biological Processes	GO:0030832	regulation of actin filament length	-4.09967	-2.152	15/194	11518,13169,17913,18643,20742,22388,23897,23999,56717,57028,66713,75339,78757,223601,225115	Add1,Dbnl,Myo1c,Pfn1,Sptbn1,Wdr1,Hax1,Twf2,Mtor,Pdxp,Actr2,Mphosph8,Rictor,Cyrib,Svil
18_Member	GO Biological Processes	GO:0031333	negative regulation of protein-containing complex assembly	-3.55632	-1.72829	12/149	11518,13169,13205,15185,18643,20742,22241,23999,65114,75339,223601,225115	Add1,Dbnl,Ddx3x,Hdac6,Pfn1,Sptbn1,Ulk1,Twf2,Vps35,Mphosph8,Cyrib,Svil
18_Member	GO Biological Processes	GO:0030837	negative regulation of actin filament polymerization	-3.55282	-1.72723	8/70	11518,13169,18643,20742,23999,75339,223601,225115	Add1,Dbnl,Pfn1,Sptbn1,Twf2,Mphosph8,Cyrib,Svil
18_Member	GO Biological Processes	GO:0010638	positive regulation of organelle organization	-3.51709	-1.70238	29/595	13433,17755,17913,18643,22241,22388,23897,26413,30954,52206,53890,56330,56399,56717,57028,59047,65114,66713,70361,74143,75339,75786,78757,98732,108155,109331,211401,218952,235072	Dnmt1,Map1b,Myo1c,Pfn1,Ulk1,Wdr1,Hax1,Mapk1,Siva1,Anapc4,Sart3,Pdcd5,Akap8,Mtor,Pdxp,Pnkp,Vps35,Actr2,Lman1,Opa1,Mphosph8,Ckap5,Rictor,Rab3gap2,Ogt,Rnf20,Mtss1,Fermt2,Septin7
18_Member	GO Biological Processes	GO:0030833	regulation of actin filament polymerization	-3.50886	-1.69772	13/173	11518,13169,17913,18643,20742,23897,23999,56717,66713,75339,78757,223601,225115	Add1,Dbnl,Myo1c,Pfn1,Sptbn1,Hax1,Twf2,Mtor,Actr2,Mphosph8,Rictor,Cyrib,Svil
18_Member	GO Biological Processes	GO:0051016	barbed-end actin filament capping	-3.2254	-1.46449	5/29	11518,13169,23999,75339,225115	Add1,Dbnl,Twf2,Mphosph8,Svil
18_Member	GO Biological Processes	GO:0090066	regulation of anatomical structure size	-3.08057	-1.34821	27/574	11518,13169,13690,14268,17755,17913,18632,18643,20352,20742,22241,22388,23897,23999,54214,56717,57028,66713,74370,75339,76499,78757,99152,108155,216344,223601,225115	Add1,Dbnl,Eif4g2,Fn1,Map1b,Myo1c,Pex11b,Pfn1,Sema4b,Sptbn1,Ulk1,Wdr1,Hax1,Twf2,Golga4,Mtor,Pdxp,Actr2,Rptor,Mphosph8,Clasp2,Rictor,Anapc2,Ogt,Rab21,Cyrib,Svil
18_Member	GO Biological Processes	GO:0032272	negative regulation of protein polymerization	-2.98217	-1.26723	8/85	11518,13169,18643,20742,23999,75339,223601,225115	Add1,Dbnl,Pfn1,Sptbn1,Twf2,Mphosph8,Cyrib,Svil
18_Member	GO Biological Processes	GO:0030835	negative regulation of actin filament depolymerization	-2.94959	-1.24864	6/49	11518,13169,20742,23999,75339,225115	Add1,Dbnl,Sptbn1,Twf2,Mphosph8,Svil
18_Member	GO Biological Processes	GO:0044089	positive regulation of cellular component biogenesis	-2.17363	-0.64416	23/541	13205,13433,16854,17755,17913,18643,22042,22240,22241,23996,23999,26921,56717,66713,75339,75786,76499,76707,78757,98732,211401,218952,235072	Ddx3x,Dnmt1,Lgals3,Map1b,Myo1c,Pfn1,Tfrc,Dpysl3,Ulk1,Psmc4,Twf2,Map4k4,Mtor,Actr2,Mphosph8,Ckap5,Clasp2,Clasp1,Rictor,Rab3gap2,Mtss1,Fermt2,Septin7
18_Member	GO Biological Processes	GO:0051495	positive regulation of cytoskeleton organization	-2.10975	-0.601148	12/221	17755,17913,18643,22388,23897,56717,57028,66713,75786,78757,211401,218952	Map1b,Myo1c,Pfn1,Wdr1,Hax1,Mtor,Pdxp,Actr2,Ckap5,Rictor,Mtss1,Fermt2
18_Member	GO Biological Processes	GO:0030041	actin filament polymerization	-4.22859	-2.2559	15/189	11518,13169,17913,18643,20742,23897,23999,56717,66713,75339,76467,78757,211401,223601,225115	Add1,Dbnl,Myo1c,Pfn1,Sptbn1,Hax1,Twf2,Mtor,Actr2,Mphosph8,Msrb2,Rictor,Mtss1,Cyrib,Svil
18_Member	GO Biological Processes	GO:0051693	actin filament capping	-3.25713	-1.48985	6/43	11518,13169,20742,23999,75339,225115	Add1,Dbnl,Sptbn1,Twf2,Mphosph8,Svil
18_Member	GO Biological Processes	GO:0032956	regulation of actin cytoskeleton organization	-4.50818	-2.4903	23/365	11518,13169,17913,18643,20742,22388,23897,23999,56717,57028,66713,70497,75339,76499,76707,78757,211401,216965,218952,223601,225115,233977,235041	Add1,Dbnl,Myo1c,Pfn1,Sptbn1,Wdr1,Hax1,Twf2,Mtor,Pdxp,Actr2,Arhgap17,Mphosph8,Clasp2,Clasp1,Rictor,Mtss1,Taok1,Fermt2,Cyrib,Svil,Ppfia1,Kank2
18_Member	GO Biological Processes	GO:0030834	regulation of actin filament depolymerization	-4.13539	-2.18282	8/58	11518,13169,20742,22388,23999,57028,75339,225115	Add1,Dbnl,Sptbn1,Wdr1,Twf2,Pdxp,Mphosph8,Svil
18_Member	GO Biological Processes	GO:0030042	actin filament depolymerization	-4.76756	-2.72821	9/62	11518,13169,20742,22388,23999,57028,75339,171580,225115	Add1,Dbnl,Sptbn1,Wdr1,Twf2,Pdxp,Mphosph8,Mical1,Svil
18_Member	GO Biological Processes	GO:1902903	regulation of supramolecular fiber organization	-7.22449	-4.85591	29/381	11518,13169,15185,17754,17755,17913,18643,20742,22388,23897,23999,26903,56717,57028,66713,75339,75786,76499,76707,78757,211401,216965,218952,223601,225115,227634,229589,233977,235041	Add1,Dbnl,Hdac6,Map1a,Map1b,Myo1c,Pfn1,Sptbn1,Wdr1,Hax1,Twf2,Dysf,Mtor,Pdxp,Actr2,Mphosph8,Ckap5,Clasp2,Clasp1,Rictor,Mtss1,Taok1,Fermt2,Cyrib,Svil,Camsap1,Prune1,Ppfia1,Kank2
18_Member	GO Biological Processes	GO:0051258	protein polymerization	-6.57738	-4.28793	24/296	11518,13169,17755,17913,18000,18643,20742,23897,23999,56717,66713,74143,75339,75786,76467,76499,76707,78757,211401,223601,225115,227634,229589,625249	Add1,Dbnl,Map1b,Myo1c,Septin2,Pfn1,Sptbn1,Hax1,Twf2,Mtor,Actr2,Opa1,Mphosph8,Ckap5,Msrb2,Clasp2,Clasp1,Rictor,Mtss1,Cyrib,Svil,Camsap1,Prune1,Gpx4
18_Member	GO Biological Processes	GO:0043254	regulation of protein-containing complex assembly	-5.88041	-3.68644	29/442	11518,13169,13205,15185,16854,17755,17913,17967,18643,20224,20742,22042,22241,23897,23996,23999,56717,65114,66713,71732,75339,75786,76499,78757,218952,223601,225115,227634,229589	Add1,Dbnl,Ddx3x,Hdac6,Lgals3,Map1b,Myo1c,Ncam1,Pfn1,Sar1a,Sptbn1,Tfrc,Ulk1,Hax1,Psmc4,Twf2,Mtor,Vps35,Actr2,Vps11,Mphosph8,Ckap5,Clasp2,Rictor,Fermt2,Cyrib,Svil,Camsap1,Prune1
18_Member	GO Biological Processes	GO:0051493	regulation of cytoskeleton organization	-5.6495	-3.48587	32/530	11518,13169,15185,17754,17755,17913,18643,20742,22388,23897,23999,26413,26903,56275,56717,57028,66713,70497,75339,75786,76499,76707,78757,211401,216965,218952,223601,225115,227634,229589,233977,235041	Add1,Dbnl,Hdac6,Map1a,Map1b,Myo1c,Pfn1,Sptbn1,Wdr1,Hax1,Twf2,Mapk1,Dysf,Rbm14,Mtor,Pdxp,Actr2,Arhgap17,Mphosph8,Ckap5,Clasp2,Clasp1,Rictor,Mtss1,Taok1,Fermt2,Cyrib,Svil,Camsap1,Prune1,Ppfia1,Kank2
18_Member	GO Biological Processes	GO:0032535	regulation of cellular component size	-5.38843	-3.26304	27/418	11518,13169,13690,14268,17755,17913,18632,18643,20352,20742,22241,22388,23897,23999,54214,56717,57028,66713,74370,75339,76499,78757,99152,108155,216344,223601,225115	Add1,Dbnl,Eif4g2,Fn1,Map1b,Myo1c,Pex11b,Pfn1,Sema4b,Sptbn1,Ulk1,Wdr1,Hax1,Twf2,Golga4,Mtor,Pdxp,Actr2,Rptor,Mphosph8,Clasp2,Rictor,Anapc2,Ogt,Rab21,Cyrib,Svil
18_Member	GO Biological Processes	GO:0110053	regulation of actin filament organization	-5.36772	-3.24842	21/277	11518,13169,17913,18643,20742,22388,23897,23999,56717,57028,66713,75339,76499,76707,78757,211401,218952,223601,225115,233977,235041	Add1,Dbnl,Myo1c,Pfn1,Sptbn1,Wdr1,Hax1,Twf2,Mtor,Pdxp,Actr2,Mphosph8,Clasp2,Clasp1,Rictor,Mtss1,Fermt2,Cyrib,Svil,Ppfia1,Kank2
18_Member	GO Molecular Functions	GO:0003779	actin binding	-6.47653	-4.21131	30/437	11518,11749,13169,13821,13822,15185,16796,17754,17755,17883,17909,17913,17918,18643,20742,21894,22388,23999,52690,54132,66713,76467,76499,80743,171580,211401,218952,225115,338355,360013	Add1,Anxa6,Dbnl,Epb41l1,Epb41l2,Hdac6,Lasp1,Map1a,Map1b,Myh3,Myo10,Myo1c,Myo5a,Pfn1,Sptbn1,Tln1,Wdr1,Twf2,Setd3,Pdlim1,Actr2,Msrb2,Clasp2,Vps16,Mical1,Mtss1,Fermt2,Svil,Fkbp15,Myo18a
18_Member	GO Biological Processes	GO:0008154	actin polymerization or depolymerization	-5.24857	-3.16056	18/216	11518,13169,17913,18643,20742,22388,23897,23999,56717,57028,66713,75339,76467,78757,171580,211401,223601,225115	Add1,Dbnl,Myo1c,Pfn1,Sptbn1,Wdr1,Hax1,Twf2,Mtor,Pdxp,Actr2,Mphosph8,Msrb2,Rictor,Mical1,Mtss1,Cyrib,Svil
18_Member	GO Molecular Functions	GO:0051015	actin filament binding	-5.36227	-3.24653	18/212	11518,11749,13169,16796,17883,17909,17913,17918,21894,22388,23999,66713,76499,80743,211401,218952,225115,360013	Add1,Anxa6,Dbnl,Lasp1,Myh3,Myo10,Myo1c,Myo5a,Tln1,Wdr1,Twf2,Actr2,Clasp2,Vps16,Mtss1,Fermt2,Svil,Myo18a
18_Member	GO Biological Processes	GO:0007015	actin filament organization	-4.859	-2.81563	27/447	11518,13169,17913,17918,18643,20742,22240,22388,23897,23999,54132,56717,57028,66713,70497,75339,76467,76499,76707,78757,171580,211401,218952,223601,225115,233977,235041	Add1,Dbnl,Myo1c,Myo5a,Pfn1,Sptbn1,Dpysl3,Wdr1,Hax1,Twf2,Pdlim1,Mtor,Pdxp,Actr2,Arhgap17,Mphosph8,Msrb2,Clasp2,Clasp1,Rictor,Mical1,Mtss1,Fermt2,Cyrib,Svil,Ppfia1,Kank2
18_Member	GO Biological Processes	GO:0032970	regulation of actin filament-based process	-4.59236	-2.56873	25/411	11518,11938,13169,17913,18643,20742,22388,23897,23999,56717,57028,66713,70497,75339,76499,76707,78757,93742,211401,216965,218952,223601,225115,233977,235041	Add1,Atp2a2,Dbnl,Myo1c,Pfn1,Sptbn1,Wdr1,Hax1,Twf2,Mtor,Pdxp,Actr2,Arhgap17,Mphosph8,Clasp2,Clasp1,Rictor,Pard3,Mtss1,Taok1,Fermt2,Cyrib,Svil,Ppfia1,Kank2
18_Member	GO Biological Processes	GO:0032271	regulation of protein polymerization	-4.89853	-2.84906	18/229	11518,13169,17755,17913,18643,20742,23897,23999,56717,66713,75339,75786,76499,78757,223601,225115,227634,229589	Add1,Dbnl,Map1b,Myo1c,Pfn1,Sptbn1,Hax1,Twf2,Mtor,Actr2,Mphosph8,Ckap5,Clasp2,Rictor,Cyrib,Svil,Camsap1,Prune1
18_Member	GO Biological Processes	GO:0097435	supramolecular fiber organization	-5.20517	-3.11939	39/748	11518,13169,15185,17754,17755,17913,17918,18643,20742,22240,22388,23897,23950,23999,26903,54132,56401,56693,56717,57028,66713,70497,75339,75786,76467,76499,76707,78757,171580,211401,216965,218952,223601,225115,227634,229589,233977,235041,338366	Add1,Dbnl,Hdac6,Map1a,Map1b,Myo1c,Myo5a,Pfn1,Sptbn1,Dpysl3,Wdr1,Hax1,Dnajb6,Twf2,Dysf,Pdlim1,P3h1,Crtap,Mtor,Pdxp,Actr2,Arhgap17,Mphosph8,Ckap5,Msrb2,Clasp2,Clasp1,Rictor,Mical1,Mtss1,Taok1,Fermt2,Cyrib,Svil,Camsap1,Prune1,Ppfia1,Kank2,Mia3
18_Member	GO Biological Processes	GO:0030036	actin cytoskeleton organization	-4.86672	-2.82133	37/717	11518,13169,13821,13822,14388,17913,17918,18643,20742,21894,22240,22388,23897,23950,23999,52690,54132,56717,57028,66713,70497,75339,76467,76499,76707,78757,171580,211401,216965,217866,218952,223601,225115,229707,233977,235041,360013	Add1,Dbnl,Epb41l1,Epb41l2,Gab1,Myo1c,Myo5a,Pfn1,Sptbn1,Tln1,Dpysl3,Wdr1,Hax1,Dnajb6,Twf2,Setd3,Pdlim1,Mtor,Pdxp,Actr2,Arhgap17,Mphosph8,Msrb2,Clasp2,Clasp1,Rictor,Mical1,Mtss1,Taok1,Cdc42bpb,Fermt2,Cyrib,Svil,Strip1,Ppfia1,Kank2,Myo18a
19_Summary	Reactome Gene Sets	R-MMU-9007101	Rab regulation of trafficking	-4.3262	-2.33192	11/111	19325,22241,60409,66050,68449,76954,77980,98732,216344,245828,320714	Rab10,Ulk1,Trappc4,0610009B22Rik,Tbc1d10b,Denn2b,Sbf1,Rab3gap2,Rab21,Trappc1,Trappc11
19_Member	Reactome Gene Sets	R-MMU-9007101	Rab regulation of trafficking	-4.10034	-2.152	11/111	19325,22241,60409,66050,68449,76954,77980,98732,216344,245828,320714	Rab10,Ulk1,Trappc4,0610009B22Rik,Tbc1d10b,Denn2b,Sbf1,Rab3gap2,Rab21,Trappc1,Trappc11
19_Member	Reactome Gene Sets	R-MMU-8876198	RAB GEFs exchange GTP for GDP on RABs	-4.3262	-2.33192	10/87	19325,22241,60409,66050,76954,77980,98732,216344,245828,320714	Rab10,Ulk1,Trappc4,0610009B22Rik,Denn2b,Sbf1,Rab3gap2,Rab21,Trappc1,Trappc11
20_Summary	Reactome Gene Sets	R-MMU-9013420	RHOU GTPase cycle	-4.06872	-2.12588	6/31	20742,22284,26431,70584,216963,244895	Sptbn1,Usp9x,Git2,Pak4,Git1,Peak1
20_Member	Reactome Gene Sets	R-MMU-9013420	RHOU GTPase cycle	-4.06872	-2.12588	6/31	20742,22284,26431,70584,216963,244895	Sptbn1,Usp9x,Git2,Pak4,Git1,Peak1
20_Member	Reactome Gene Sets	R-MMU-9013424	RHOV GTPase cycle	-3.2254	-1.46449	5/29	20742,22284,26431,216963,244895	Sptbn1,Usp9x,Git2,Git1,Peak1

## Sheet: Cluster 03
GroupID	Category	Term	Description	LogP	Log(q-value)	InTerm_InList	Genes	Symbols
1_Summary	Reactome Gene Sets	R-MMU-8953854	Metabolism of RNA	-100	-95.6236	147/549	11737,13204,13209,13684,14105,15382,15387,15388,16785,16898,17975,18458,18572,19166,19167,19172,19175,19188,19704,19921,19934,19942,19946,19988,19989,20005,20020,20044,20055,20085,20090,20091,20102,20103,20104,20116,20462,20624,20638,20639,20641,20643,20826,22121,22608,23983,26440,26442,26443,26444,26451,26961,27050,27176,27207,27367,27374,27966,27998,28035,50783,51786,53414,53607,54364,54451,545…	Anp32a,Dhx15,Ddx6,Eif4e,Srsf10,Hnrnpa1,Hnrnpk,Hnrnpl,Rpsa,Rps2,Ncl,Pabpc1,Pdcd11,Psma2,Psma3,Psmb4,Psmb6,Psme2,Upf1,Rpl19,Rpl22,Rpl27,Rpl30,Rpl6,Rpl7,Rpl9,Polr2a,Rps14,Rps16,Rps19,Rps29,Rps3a1,Rps4x,Rps5,Rps6,Rps8,Tra2b,Eftud2,Snrpb,Snrpb2,Snrpd1,Snrpe,Snu13,Rpl13a,Ybx1,Pcbp1,Psma1,Psma5,Psma6,Psma7,Rpl27a,Rpl8,Rps3,Rpl7a,Rps11,Rpl3,Prmt5,Rrp9,Exosc5,Usp39,Lsm4,Cpsf2,Bysl,Snrpa,Rpp30,Cpsf3,Nup210…
1_Member	Reactome Gene Sets	R-MMU-8953854	Metabolism of RNA	-100	-95.6236	147/549	11737,13204,13209,13684,14105,15382,15387,15388,16785,16898,17975,18458,18572,19166,19167,19172,19175,19188,19704,19921,19934,19942,19946,19988,19989,20005,20020,20044,20055,20085,20090,20091,20102,20103,20104,20116,20462,20624,20638,20639,20641,20643,20826,22121,22608,23983,26440,26442,26443,26444,26451,26961,27050,27176,27207,27367,27374,27966,27998,28035,50783,51786,53414,53607,54364,54451,545…	Anp32a,Dhx15,Ddx6,Eif4e,Srsf10,Hnrnpa1,Hnrnpk,Hnrnpl,Rpsa,Rps2,Ncl,Pabpc1,Pdcd11,Psma2,Psma3,Psmb4,Psmb6,Psme2,Upf1,Rpl19,Rpl22,Rpl27,Rpl30,Rpl6,Rpl7,Rpl9,Polr2a,Rps14,Rps16,Rps19,Rps29,Rps3a1,Rps4x,Rps5,Rps6,Rps8,Tra2b,Eftud2,Snrpb,Snrpb2,Snrpd1,Snrpe,Snu13,Rpl13a,Ybx1,Pcbp1,Psma1,Psma5,Psma6,Psma7,Rpl27a,Rpl8,Rps3,Rpl7a,Rps11,Rpl3,Prmt5,Rrp9,Exosc5,Usp39,Lsm4,Cpsf2,Bysl,Snrpa,Rpp30,Cpsf3,Nup210…
1_Member	Reactome Gene Sets	R-MMU-72165	mRNA Splicing - Minor Pathway	-17.5781	-14.9799	19/48	20020,20624,20638,20641,20643,20826,22608,66055,66585,67332,67996,68011,69878,101943,107686,225027,245841,320632,433702	Polr2a,Eftud2,Snrpb,Snrpd1,Snrpe,Snu13,Ybx1,Sf3b6,Snrnp40,Snrpd3,Srsf6,Snrpg,Snrpf,Sf3b3,Snrpd2,Srsf7,Polr2h,Snrnp200,Ncbp1
1_Member	GO Biological Processes	GO:0000398	mRNA splicing, via spliceosome	-18.9384	-16.3102	41/278	14105,15382,15387,15388,17975,18148,19205,20462,20624,20638,20639,20641,20643,20815,20826,27374,28035,50783,53607,66055,66645,67332,67678,67996,68011,68479,68988,69878,70248,74255,76522,101943,107686,108014,216766,225027,237221,269966,276919,320632,433702	Srsf10,Hnrnpa1,Hnrnpk,Hnrnpl,Ncl,Npm1,Ptbp1,Tra2b,Eftud2,Snrpb,Snrpb2,Snrpd1,Snrpe,Srpk1,Snu13,Prmt5,Usp39,Lsm4,Snrpa,Sf3b6,Pspc1,Snrpd3,Lsm3,Srsf6,Snrpg,Phf5a,Prpf31,Snrpf,Dazap1,Smu1,Lsm8,Sf3b3,Snrpd2,Srsf9,Gemin5,Srsf7,Gemin8,Nup98,Gemin4,Snrnp200,Ncbp1
1_Member	GO Biological Processes	GO:0000377	RNA splicing, via transesterification reactions with bulged adenosine as nucleophile	-18.9384	-16.3102	41/278	14105,15382,15387,15388,17975,18148,19205,20462,20624,20638,20639,20641,20643,20815,20826,27374,28035,50783,53607,66055,66645,67332,67678,67996,68011,68479,68988,69878,70248,74255,76522,101943,107686,108014,216766,225027,237221,269966,276919,320632,433702	Srsf10,Hnrnpa1,Hnrnpk,Hnrnpl,Ncl,Npm1,Ptbp1,Tra2b,Eftud2,Snrpb,Snrpb2,Snrpd1,Snrpe,Srpk1,Snu13,Prmt5,Usp39,Lsm4,Snrpa,Sf3b6,Pspc1,Snrpd3,Lsm3,Srsf6,Snrpg,Phf5a,Prpf31,Snrpf,Dazap1,Smu1,Lsm8,Sf3b3,Snrpd2,Srsf9,Gemin5,Srsf7,Gemin8,Nup98,Gemin4,Snrnp200,Ncbp1
1_Member	GO Biological Processes	GO:0000375	RNA splicing, via transesterification reactions	-18.9384	-16.3102	41/278	14105,15382,15387,15388,17975,18148,19205,20462,20624,20638,20639,20641,20643,20815,20826,27374,28035,50783,53607,66055,66645,67332,67678,67996,68011,68479,68988,69878,70248,74255,76522,101943,107686,108014,216766,225027,237221,269966,276919,320632,433702	Srsf10,Hnrnpa1,Hnrnpk,Hnrnpl,Ncl,Npm1,Ptbp1,Tra2b,Eftud2,Snrpb,Snrpb2,Snrpd1,Snrpe,Srpk1,Snu13,Prmt5,Usp39,Lsm4,Snrpa,Sf3b6,Pspc1,Snrpd3,Lsm3,Srsf6,Snrpg,Phf5a,Prpf31,Snrpf,Dazap1,Smu1,Lsm8,Sf3b3,Snrpd2,Srsf9,Gemin5,Srsf7,Gemin8,Nup98,Gemin4,Snrnp200,Ncbp1
1_Member	GO Biological Processes	GO:0008380	RNA splicing	-20.8776	-18.2001	51/394	13204,14105,15382,15387,15388,17975,18148,18458,18949,19205,20020,20462,20624,20638,20639,20641,20643,20815,20826,22608,27374,28035,50783,53607,56070,66055,66185,66585,66645,67332,67678,67755,67996,68011,68479,68988,69878,70248,74255,75710,76522,101943,107686,108014,216766,225027,237221,269966,276919,320632,433702	Dhx15,Srsf10,Hnrnpa1,Hnrnpk,Hnrnpl,Ncl,Npm1,Pabpc1,Pnn,Ptbp1,Polr2a,Tra2b,Eftud2,Snrpb,Snrpb2,Snrpd1,Snrpe,Srpk1,Snu13,Ybx1,Prmt5,Usp39,Lsm4,Snrpa,Tcerg1,Sf3b6,Virma,Snrnp40,Pspc1,Snrpd3,Lsm3,Ddx47,Srsf6,Snrpg,Phf5a,Prpf31,Snrpf,Dazap1,Smu1,Rbm12,Lsm8,Sf3b3,Snrpd2,Srsf9,Gemin5,Srsf7,Gemin8,Nup98,Gemin4,Snrnp200,Ncbp1
1_Member	KEGG Pathway	ko03040	Spliceosome	-21.5355	-18.8493	32/133	13204,14105,15382,15387,20462,20624,20638,20639,20641,20643,20826,23983,28035,50783,53607,56070,66055,66585,67332,67678,67996,68011,68479,68988,69878,76522,101943,107686,108014,225027,320632,433702	Dhx15,Srsf10,Hnrnpa1,Hnrnpk,Tra2b,Eftud2,Snrpb,Snrpb2,Snrpd1,Snrpe,Snu13,Pcbp1,Usp39,Lsm4,Snrpa,Tcerg1,Sf3b6,Snrnp40,Snrpd3,Lsm3,Srsf6,Snrpg,Phf5a,Prpf31,Snrpf,Lsm8,Sf3b3,Snrpd2,Srsf9,Srsf7,Snrnp200,Ncbp1
1_Member	KEGG Pathway	mmu03040	Spliceosome	-21.5355	-18.8493	32/133	13204,14105,15382,15387,20462,20624,20638,20639,20641,20643,20826,23983,28035,50783,53607,56070,66055,66585,67332,67678,67996,68011,68479,68988,69878,76522,101943,107686,108014,225027,320632,433702	Dhx15,Srsf10,Hnrnpa1,Hnrnpk,Tra2b,Eftud2,Snrpb,Snrpb2,Snrpd1,Snrpe,Snu13,Pcbp1,Usp39,Lsm4,Snrpa,Tcerg1,Sf3b6,Snrnp40,Snrpd3,Lsm3,Srsf6,Snrpg,Phf5a,Prpf31,Snrpf,Lsm8,Sf3b3,Snrpd2,Srsf9,Srsf7,Snrnp200,Ncbp1
1_Member	Reactome Gene Sets	R-MMU-72172	mRNA Splicing	-25.5911	-22.8481	40/178	13204,14105,15382,15387,15388,20020,20462,20624,20638,20639,20641,20643,20826,22608,23983,28035,50783,51786,53607,54451,66055,66585,67285,67332,67337,67678,67996,68011,68479,68988,69878,76522,94230,101943,107686,108014,225027,245841,320632,433702	Dhx15,Srsf10,Hnrnpa1,Hnrnpk,Hnrnpl,Polr2a,Tra2b,Eftud2,Snrpb,Snrpb2,Snrpd1,Snrpe,Snu13,Ybx1,Pcbp1,Usp39,Lsm4,Cpsf2,Snrpa,Cpsf3,Sf3b6,Snrnp40,Cwc27,Snrpd3,Cstf1,Lsm3,Srsf6,Snrpg,Phf5a,Prpf31,Snrpf,Lsm8,Cpsf1,Sf3b3,Snrpd2,Srsf9,Srsf7,Polr2h,Snrnp200,Ncbp1
1_Member	Reactome Gene Sets	R-MMU-72163	mRNA Splicing - Major Pathway	-26.2036	-23.44	40/172	13204,14105,15382,15387,15388,20020,20462,20624,20638,20639,20641,20643,20826,22608,23983,28035,50783,51786,53607,54451,66055,66585,67285,67332,67337,67678,67996,68011,68479,68988,69878,76522,94230,101943,107686,108014,225027,245841,320632,433702	Dhx15,Srsf10,Hnrnpa1,Hnrnpk,Hnrnpl,Polr2a,Tra2b,Eftud2,Snrpb,Snrpb2,Snrpd1,Snrpe,Snu13,Ybx1,Pcbp1,Usp39,Lsm4,Cpsf2,Snrpa,Cpsf3,Sf3b6,Snrnp40,Cwc27,Snrpd3,Cstf1,Lsm3,Srsf6,Snrpg,Phf5a,Prpf31,Snrpf,Lsm8,Cpsf1,Sf3b3,Snrpd2,Srsf9,Srsf7,Polr2h,Snrnp200,Ncbp1
1_Member	GO Biological Processes	GO:0016071	mRNA metabolic process	-27.8131	-24.993	76/660	13204,14105,15382,15387,15388,16341,17975,18148,18458,18572,18747,18949,19205,19704,20462,20624,20638,20639,20641,20643,20815,20823,20826,21379,22083,22608,23983,27374,27998,28035,50783,51786,53607,54451,56070,56417,66055,66185,66585,66645,66926,67332,67337,67678,67755,67996,68011,68479,68988,69878,69902,70044,70248,72544,74133,74255,76522,94230,101943,103677,107686,108014,140486,208718,216766,22…	Dhx15,Srsf10,Hnrnpa1,Hnrnpk,Hnrnpl,Eif3e,Ncl,Npm1,Pabpc1,Pdcd11,Prkaca,Pnn,Ptbp1,Upf1,Tra2b,Eftud2,Snrpb,Snrpb2,Snrpd1,Snrpe,Srpk1,Ssb,Snu13,Tbrg4,Ctr9,Ybx1,Pcbp1,Prmt5,Exosc5,Usp39,Lsm4,Cpsf2,Snrpa,Cpsf3,Tcerg1,Adar,Sf3b6,Virma,Snrnp40,Pspc1,Trmt6,Snrpd3,Cstf1,Lsm3,Ddx47,Srsf6,Snrpg,Phf5a,Prpf31,Snrpf,Mrto4,Tut1,Dazap1,Exosc6,Smg8,Smu1,Lsm8,Cpsf1,Sf3b3,Smg6,Snrpd2,Srsf9,Igf2bp1,Dis3l2,Gemin5,Srs…
1_Member	WikiPathways	WP310	mRNA processing	-33.63	-30.685	70/453	13204,13209,13684,13722,14105,15382,15387,15388,17975,18148,18458,19205,19663,19921,19934,19989,20005,20020,20044,20090,20102,20104,20462,20624,20638,20639,20641,20643,20815,20823,20826,22608,23983,26961,27041,27207,27979,27998,50783,51786,53356,53607,54451,56200,56417,66055,66185,66230,66585,66645,67053,67248,67332,67337,67427,67996,68011,68479,69878,70044,70248,75710,76522,94230,101943,107686,1…	Dhx15,Ddx6,Eif4e,Aimp1,Srsf10,Hnrnpa1,Hnrnpk,Hnrnpl,Ncl,Npm1,Pabpc1,Ptbp1,Rbpms,Rpl19,Rpl22,Rpl7,Rpl9,Polr2a,Rps14,Rps29,Rps4x,Rps6,Tra2b,Eftud2,Snrpb,Snrpb2,Snrpd1,Snrpe,Srpk1,Ssb,Snu13,Ybx1,Pcbp1,Rpl8,G3bp1,Rps11,Eif3b,Exosc5,Lsm4,Cpsf2,Eif3g,Snrpa,Cpsf3,Ddx21,Adar,Sf3b6,Virma,Mrps28,Snrnp40,Pspc1,Rpp14,Rpl39,Snrpd3,Cstf1,Rps20,Srsf6,Snrpg,Phf5a,Snrpf,Tut1,Dazap1,Rbm12,Lsm8,Cpsf1,Sf3b3,Snrpd2,S…
1_Member	Reactome Gene Sets	R-MMU-72203	Processing of Capped Intron-Containing Pre-mRNA	-36.7794	-33.6582	55/229	13204,13684,14105,15382,15387,15388,20020,20462,20624,20638,20639,20641,20643,20826,22608,23983,28035,50783,51786,53607,54451,54563,59015,66055,66585,67285,67332,67337,67678,67996,68011,68479,68988,69482,69878,69912,71805,71844,72124,72787,76522,94230,101943,103468,107686,108014,108989,225027,227699,234865,245841,269113,269966,320632,433702	Dhx15,Eif4e,Srsf10,Hnrnpa1,Hnrnpk,Hnrnpl,Polr2a,Tra2b,Eftud2,Snrpb,Snrpb2,Snrpd1,Snrpe,Snu13,Ybx1,Pcbp1,Usp39,Lsm4,Cpsf2,Snrpa,Cpsf3,Nup210,Nup160,Sf3b6,Snrnp40,Cwc27,Snrpd3,Cstf1,Lsm3,Srsf6,Snrpg,Phf5a,Prpf31,Nup35,Snrpf,Nup43,Nup93,Nupl1,Seh1l,Ndc1,Lsm8,Cpsf1,Sf3b3,Nup107,Snrpd2,Srsf9,Tpr,Srsf7,Nup188,Nup133,Polr2h,Nup54,Nup98,Snrnp200,Ncbp1
1_Member	GO Biological Processes	GO:0006397	mRNA processing	-25.1819	-22.4489	61/467	13204,14105,15382,15387,15388,17975,18148,18458,18572,18747,18949,19205,20462,20624,20638,20639,20641,20643,20815,20826,21379,22083,22608,23983,27374,28035,50783,51786,53607,54451,56070,56417,66055,66185,66585,66645,67332,67337,67678,67755,67996,68011,68479,68988,69878,70044,70248,74255,76522,94230,101943,107686,108014,216766,225027,235497,237221,269966,276919,320632,433702	Dhx15,Srsf10,Hnrnpa1,Hnrnpk,Hnrnpl,Ncl,Npm1,Pabpc1,Pdcd11,Prkaca,Pnn,Ptbp1,Tra2b,Eftud2,Snrpb,Snrpb2,Snrpd1,Snrpe,Srpk1,Snu13,Tbrg4,Ctr9,Ybx1,Pcbp1,Prmt5,Usp39,Lsm4,Cpsf2,Snrpa,Cpsf3,Tcerg1,Adar,Sf3b6,Virma,Snrnp40,Pspc1,Snrpd3,Cstf1,Lsm3,Ddx47,Srsf6,Snrpg,Phf5a,Prpf31,Snrpf,Tut1,Dazap1,Smu1,Lsm8,Cpsf1,Sf3b3,Snrpd2,Srsf9,Gemin5,Srsf7,Leo1,Gemin8,Nup98,Gemin4,Snrnp200,Ncbp1
2_Summary	Reactome Gene Sets	R-MMU-1799339	SRP-dependent cotranslational protein targeting to membrane	-57.7795	-54.102	38/89	16785,16898,19921,19934,19942,19946,19988,19989,20005,20044,20055,20085,20090,20091,20102,20103,20104,20116,22121,26451,26961,27050,27176,27207,27367,56040,57808,66481,67115,67248,67427,67891,76808,114641,267019,268449,270106,100503670,17975,18148,56200,215193,13669,18746,19896,26905,54217,54709,55944,67204,69740,75705,83557,98221,218629,67134,67160,69237,69902,110109,230737,20042,13209,13244,136…	Rpsa,Rps2,Rpl19,Rpl22,Rpl27,Rpl30,Rpl6,Rpl7,Rpl9,Rps14,Rps16,Rps19,Rps29,Rps3a1,Rps4x,Rps5,Rps6,Rps8,Rpl13a,Rpl27a,Rpl8,Rps3,Rpl7a,Rps11,Rpl3,Rplp1,Rpl35a,Rps21,Rpl14,Rpl39,Rps20,Rpl4,Rpl18a,Rpl31,Rps15a,Rpl23a,Rpl13,Rpl5,Ncl,Npm1,Ddx21,Utp25,Eif3a,Pkm,Rpl10a,Eif2s3x,Rpl36,Eif3i,Eif3d,Eif2s2,Dph5,Eif4b,Lin28a,Eif3m,Dhx29,Nop56,Eef1g,Gtpbp4,Mrto4,Nop2,Gnl2,Rps12,Ddx6,Degs1,Eif2s1,Eif2b4,Eif4e,Aimp…
2_Member	Reactome Gene Sets	R-MMU-1799339	SRP-dependent cotranslational protein targeting to membrane	-36.1925	-33.1171	38/89	16785,16898,19921,19934,19942,19946,19988,19989,20005,20044,20055,20085,20090,20091,20102,20103,20104,20116,22121,26451,26961,27050,27176,27207,27367,56040,57808,66481,67115,67248,67427,67891,76808,114641,267019,268449,270106,100503670	Rpsa,Rps2,Rpl19,Rpl22,Rpl27,Rpl30,Rpl6,Rpl7,Rpl9,Rps14,Rps16,Rps19,Rps29,Rps3a1,Rps4x,Rps5,Rps6,Rps8,Rpl13a,Rpl27a,Rpl8,Rps3,Rpl7a,Rps11,Rpl3,Rplp1,Rpl35a,Rps21,Rpl14,Rpl39,Rps20,Rpl4,Rpl18a,Rpl31,Rps15a,Rpl23a,Rpl13,Rpl5
2_Member	GO Molecular Functions	GO:0019843	rRNA binding	-12.6773	-10.2877	18/72	17975,18148,19921,19988,19989,20005,20044,20102,20103,26961,27050,27207,27367,56200,67891,215193,268449,100503670	Ncl,Npm1,Rpl19,Rpl6,Rpl7,Rpl9,Rps14,Rps4x,Rps5,Rpl8,Rps3,Rps11,Rpl3,Ddx21,Rpl4,Utp25,Rpl23a,Rpl5
2_Member	GO Biological Processes	GO:0002181	cytoplasmic translation	-23.2286	-20.5149	29/92	13669,16785,16898,18746,19896,19921,19934,19946,19988,20005,20090,22121,26905,26961,54217,54709,55944,56040,57808,66481,67204,67248,69740,75705,76808,83557,98221,114641,218629	Eif3a,Rpsa,Rps2,Pkm,Rpl10a,Rpl19,Rpl22,Rpl30,Rpl6,Rpl9,Rps29,Rpl13a,Eif2s3x,Rpl8,Rpl36,Eif3i,Eif3d,Rplp1,Rpl35a,Rps21,Eif2s2,Rpl39,Dph5,Eif4b,Rpl18a,Lin28a,Eif3m,Rpl31,Dhx29
2_Member	CORUM	CORUM:3047	Parvulin-associated pre-rRNP complex	-26.1398	-23.3867	25/50	17975,19921,19988,19989,20091,20102,20104,20116,22121,26961,27050,27176,27367,56200,67115,67134,67160,67891,69237,69902,76808,110109,230737,270106,100503670	Ncl,Rpl19,Rpl6,Rpl7,Rps3a1,Rps4x,Rps6,Rps8,Rpl13a,Rpl8,Rps3,Rpl7a,Rpl3,Ddx21,Rpl14,Nop56,Eef1g,Rpl4,Gtpbp4,Mrto4,Rpl18a,Nop2,Gnl2,Rpl13,Rpl5
2_Member	KEGG Pathway	mmu03010	Ribosome	-26.9871	-24.2128	41/175	16785,16898,19896,19921,19934,19942,19946,19988,19989,20005,20042,20044,20055,20085,20090,20091,20102,20103,20104,20116,22121,26451,26961,27050,27176,27207,27367,54217,56040,57808,66481,67115,67248,67427,67891,76808,114641,267019,268449,270106,100503670	Rpsa,Rps2,Rpl10a,Rpl19,Rpl22,Rpl27,Rpl30,Rpl6,Rpl7,Rpl9,Rps12,Rps14,Rps16,Rps19,Rps29,Rps3a1,Rps4x,Rps5,Rps6,Rps8,Rpl13a,Rpl27a,Rpl8,Rps3,Rpl7a,Rps11,Rpl3,Rpl36,Rplp1,Rpl35a,Rps21,Rpl14,Rpl39,Rps20,Rpl4,Rpl18a,Rpl31,Rps15a,Rpl23a,Rpl13,Rpl5
2_Member	KEGG Pathway	ko03010	Ribosome	-27.0928	-24.3074	41/174	16785,16898,19896,19921,19934,19942,19946,19988,19989,20005,20042,20044,20055,20085,20090,20091,20102,20103,20104,20116,22121,26451,26961,27050,27176,27207,27367,54217,56040,57808,66481,67115,67248,67427,67891,76808,114641,267019,268449,270106,100503670	Rpsa,Rps2,Rpl10a,Rpl19,Rpl22,Rpl27,Rpl30,Rpl6,Rpl7,Rpl9,Rps12,Rps14,Rps16,Rps19,Rps29,Rps3a1,Rps4x,Rps5,Rps6,Rps8,Rpl13a,Rpl27a,Rpl8,Rps3,Rpl7a,Rps11,Rpl3,Rpl36,Rplp1,Rpl35a,Rps21,Rpl14,Rpl39,Rps20,Rpl4,Rpl18a,Rpl31,Rps15a,Rpl23a,Rpl13,Rpl5
2_Member	GO Molecular Functions	GO:0003735	structural constituent of ribosome	-27.7434	-24.9352	40/158	16785,16898,19896,19921,19934,19942,19946,19988,19989,20005,20042,20044,20055,20085,20090,20091,20102,20103,20104,20116,22121,26451,26961,27050,27207,27367,54217,56040,57808,66481,67115,67248,67427,67891,76808,114641,267019,268449,270106,100503670	Rpsa,Rps2,Rpl10a,Rpl19,Rpl22,Rpl27,Rpl30,Rpl6,Rpl7,Rpl9,Rps12,Rps14,Rps16,Rps19,Rps29,Rps3a1,Rps4x,Rps5,Rps6,Rps8,Rpl13a,Rpl27a,Rpl8,Rps3,Rps11,Rpl3,Rpl36,Rplp1,Rpl35a,Rps21,Rpl14,Rpl39,Rps20,Rpl4,Rpl18a,Rpl31,Rps15a,Rpl23a,Rpl13,Rpl5
2_Member	GO Biological Processes	GO:0043604	amide biosynthetic process	-32.4957	-29.5817	88/761	13209,13244,13665,13667,13669,13684,13722,14194,14433,14694,15388,16341,16418,16785,16898,17975,18148,18746,18813,19205,19704,19896,19921,19934,19946,19988,19989,20005,20042,20044,20055,20085,20090,20091,20102,20103,20116,22121,23874,26451,26905,26961,27050,27207,27367,27979,53356,53872,54217,54709,55944,56040,57808,66085,66244,66481,66844,67115,67160,67204,67248,67427,67891,69740,73830,75705,768…	Ddx6,Degs1,Eif2s1,Eif2b4,Eif3a,Eif4e,Aimp1,Fh1,Gapdh,Rack1,Hnrnpl,Eif3e,Eif6,Rpsa,Rps2,Ncl,Npm1,Pkm,Pa2g4,Ptbp1,Upf1,Rpl10a,Rpl19,Rpl22,Rpl30,Rpl6,Rpl7,Rpl9,Rps12,Rps14,Rps16,Rps19,Rps29,Rps3a1,Rps4x,Rps5,Rps8,Rpl13a,Farsb,Rpl27a,Eif2s3x,Rpl8,Rps3,Rps11,Rpl3,Eif3b,Eif3g,Caprin1,Rpl36,Eif3i,Eif3d,Rplp1,Rpl35a,Eif3f,Nemf,Rps21,Ormdl2,Rpl14,Eef1g,Eif2s2,Rpl39,Rps20,Rpl4,Dph5,Eif3k,Eif4b,Rpl18a,Lin28…
2_Member	GO Biological Processes	GO:0043043	peptide biosynthetic process	-34.5959	-31.5997	84/649	13209,13665,13667,13669,13684,13722,14433,14694,15388,16341,16418,16785,16898,17975,18148,18746,18813,19205,19704,19896,19921,19934,19946,19988,19989,20005,20042,20044,20055,20085,20090,20091,20102,20103,20116,22121,23874,26451,26905,26961,27050,27207,27367,27979,53356,53872,54217,54709,55944,56040,57808,66085,66244,66481,67115,67160,67204,67248,67427,67891,69740,73830,75705,76808,83557,85305,982…	Ddx6,Eif2s1,Eif2b4,Eif3a,Eif4e,Aimp1,Gapdh,Rack1,Hnrnpl,Eif3e,Eif6,Rpsa,Rps2,Ncl,Npm1,Pkm,Pa2g4,Ptbp1,Upf1,Rpl10a,Rpl19,Rpl22,Rpl30,Rpl6,Rpl7,Rpl9,Rps12,Rps14,Rps16,Rps19,Rps29,Rps3a1,Rps4x,Rps5,Rps8,Rpl13a,Farsb,Rpl27a,Eif2s3x,Rpl8,Rps3,Rps11,Rpl3,Eif3b,Eif3g,Caprin1,Rpl36,Eif3i,Eif3d,Rplp1,Rpl35a,Eif3f,Nemf,Rps21,Rpl14,Eef1g,Eif2s2,Rpl39,Rps20,Rpl4,Dph5,Eif3k,Eif4b,Rpl18a,Lin28a,Kars,Eif3m,Nat1…
2_Member	GO Biological Processes	GO:0006412	translation	-35.8366	-32.7824	84/625	13209,13665,13667,13669,13684,13722,14433,14694,15388,16341,16418,16785,16898,17975,18148,18746,18813,19205,19704,19896,19921,19934,19946,19988,19989,20005,20042,20044,20055,20085,20090,20091,20102,20103,20116,22121,23874,26451,26905,26961,27050,27207,27367,27979,53356,53872,54217,54709,55944,56040,57808,66085,66244,66481,67115,67160,67204,67248,67427,67891,69740,73830,75705,76808,83557,85305,982…	Ddx6,Eif2s1,Eif2b4,Eif3a,Eif4e,Aimp1,Gapdh,Rack1,Hnrnpl,Eif3e,Eif6,Rpsa,Rps2,Ncl,Npm1,Pkm,Pa2g4,Ptbp1,Upf1,Rpl10a,Rpl19,Rpl22,Rpl30,Rpl6,Rpl7,Rpl9,Rps12,Rps14,Rps16,Rps19,Rps29,Rps3a1,Rps4x,Rps5,Rps8,Rpl13a,Farsb,Rpl27a,Eif2s3x,Rpl8,Rps3,Rps11,Rpl3,Eif3b,Eif3g,Caprin1,Rpl36,Eif3i,Eif3d,Rplp1,Rpl35a,Eif3f,Nemf,Rps21,Rpl14,Eef1g,Eif2s2,Rpl39,Rps20,Rpl4,Dph5,Eif3k,Eif4b,Rpl18a,Lin28a,Kars,Eif3m,Nat1…
2_Member	WikiPathways	WP163	Cytoplasmic Ribosomal Proteins	-36.3199	-33.2223	39/95	16785,16898,19896,19921,19934,19942,19946,19988,19989,20005,20042,20044,20055,20085,20090,20091,20102,20103,20104,20116,22121,26451,26961,27050,27176,27207,27367,54217,56040,57808,66481,67248,67427,67891,76808,114641,267019,268449,270106	Rpsa,Rps2,Rpl10a,Rpl19,Rpl22,Rpl27,Rpl30,Rpl6,Rpl7,Rpl9,Rps12,Rps14,Rps16,Rps19,Rps29,Rps3a1,Rps4x,Rps5,Rps6,Rps8,Rpl13a,Rpl27a,Rpl8,Rps3,Rpl7a,Rps11,Rpl3,Rpl36,Rplp1,Rpl35a,Rps21,Rpl39,Rps20,Rpl4,Rpl18a,Rpl31,Rps15a,Rpl23a,Rpl13
2_Member	GO Molecular Functions	GO:0005198	structural molecule activity	-23.1918	-20.4875	65/577	12385,13383,13518,16480,16772,16776,16777,16785,16898,17904,19896,19921,19934,19942,19946,19988,19989,20005,20042,20044,20055,20085,20090,20091,20102,20103,20104,20116,22121,26451,26961,27050,27207,27367,54217,56040,57808,59015,66481,67115,67248,67427,67776,67891,68051,69482,69675,70699,71805,71844,72124,72787,76808,102866,103468,108989,114641,227699,234865,267019,268449,269113,269966,270106,1005…	Ctnna1,Dlg1,Dst,Jup,Lama1,Lama5,Lamb1,Rpsa,Rps2,Myl6,Rpl10a,Rpl19,Rpl22,Rpl27,Rpl30,Rpl6,Rpl7,Rpl9,Rps12,Rps14,Rps16,Rps19,Rps29,Rps3a1,Rps4x,Rps5,Rps6,Rps8,Rpl13a,Rpl27a,Rpl8,Rps3,Rps11,Rpl3,Rpl36,Rplp1,Rpl35a,Nup160,Rps21,Rpl14,Rpl39,Rps20,Vwa5a,Rpl4,Nutf2,Nup35,Pxdn,Nup205,Nup93,Nupl1,Seh1l,Ndc1,Rpl18a,Pls3,Nup107,Tpr,Rpl31,Nup188,Nup133,Rps15a,Rpl23a,Nup54,Nup98,Rpl13,Rpl5
2_Member	Reactome Gene Sets	R-MMU-72766	Translation	-41.1573	-37.927	58/221	13665,13667,13669,13684,16341,16785,16898,18458,19921,19934,19942,19946,19988,19989,20005,20044,20055,20085,20090,20091,20102,20103,20104,20116,22121,26451,26905,26961,27050,27176,27207,27367,27979,53356,54709,55944,56040,57808,66085,66230,66481,67115,67160,67204,67248,67427,67891,73830,75705,76808,98221,114641,223691,267019,268449,270106,320806,100503670	Eif2s1,Eif2b4,Eif3a,Eif4e,Eif3e,Rpsa,Rps2,Pabpc1,Rpl19,Rpl22,Rpl27,Rpl30,Rpl6,Rpl7,Rpl9,Rps14,Rps16,Rps19,Rps29,Rps3a1,Rps4x,Rps5,Rps6,Rps8,Rpl13a,Rpl27a,Eif2s3x,Rpl8,Rps3,Rpl7a,Rps11,Rpl3,Eif3b,Eif3g,Eif3i,Eif3d,Rplp1,Rpl35a,Eif3f,Mrps28,Rps21,Rpl14,Eef1g,Eif2s2,Rpl39,Rps20,Rpl4,Eif3k,Eif4b,Rpl18a,Eif3m,Rpl31,Eif3l,Rps15a,Rpl23a,Rpl13,Gfm2,Rpl5
2_Member	Reactome Gene Sets	R-MMU-6791226	Major pathway of rRNA processing in the nucleolus and cytosol	-57.7795	-54.102	65/172	16785,16898,17975,18572,19921,19934,19942,19946,19988,19989,20005,20044,20055,20085,20090,20091,20102,20103,20104,20116,20826,22121,26451,26961,27050,27176,27207,27367,27966,27998,53414,54364,56040,56200,57808,66138,66481,66583,67115,67134,67248,67427,67755,67891,72544,72554,73674,75273,75416,76130,76808,104662,114641,208144,213895,215193,216156,217995,227715,230082,267019,268449,269536,270106,10…	Rpsa,Rps2,Ncl,Pdcd11,Rpl19,Rpl22,Rpl27,Rpl30,Rpl6,Rpl7,Rpl9,Rps14,Rps16,Rps19,Rps29,Rps3a1,Rps4x,Rps5,Rps6,Rps8,Snu13,Rpl13a,Rpl27a,Rpl8,Rps3,Rpl7a,Rps11,Rpl3,Rrp9,Exosc5,Bysl,Rpp30,Rplp1,Ddx21,Rpl35a,Bud23,Rps21,Exosc1,Rpl14,Nop56,Rpl39,Rps20,Ddx47,Rpl4,Exosc6,Utp14a,Wdr75,Pelp1,Nop14,Las1l,Rpl18a,Tsr1,Rpl31,Dhx37,Bms1,Utp25,Wdr18,Heatr1,Exosc2,Nol6,Rps15a,Rpl23a,Tex10,Rpl13,Rpl5
2_Member	Reactome Gene Sets	R-MMU-975956	Nonsense Mediated Decay (NMD) independent of the Exon Junction Complex (EJC)	-40.2308	-37.0305	41/91	16785,16898,18458,19704,19921,19934,19942,19946,19988,19989,20005,20044,20055,20085,20090,20091,20102,20103,20104,20116,22121,26451,26961,27050,27176,27207,27367,56040,57808,66481,67115,67248,67427,67891,76808,114641,267019,268449,270106,433702,100503670	Rpsa,Rps2,Pabpc1,Upf1,Rpl19,Rpl22,Rpl27,Rpl30,Rpl6,Rpl7,Rpl9,Rps14,Rps16,Rps19,Rps29,Rps3a1,Rps4x,Rps5,Rps6,Rps8,Rpl13a,Rpl27a,Rpl8,Rps3,Rpl7a,Rps11,Rpl3,Rplp1,Rpl35a,Rps21,Rpl14,Rpl39,Rps20,Rpl4,Rpl18a,Rpl31,Rps15a,Rpl23a,Rpl13,Ncbp1,Rpl5
2_Member	Reactome Gene Sets	R-MMU-72312	rRNA processing	-57.7795	-54.102	65/172	16785,16898,17975,18572,19921,19934,19942,19946,19988,19989,20005,20044,20055,20085,20090,20091,20102,20103,20104,20116,20826,22121,26451,26961,27050,27176,27207,27367,27966,27998,53414,54364,56040,56200,57808,66138,66481,66583,67115,67134,67248,67427,67755,67891,72544,72554,73674,75273,75416,76130,76808,104662,114641,208144,213895,215193,216156,217995,227715,230082,267019,268449,269536,270106,10…	Rpsa,Rps2,Ncl,Pdcd11,Rpl19,Rpl22,Rpl27,Rpl30,Rpl6,Rpl7,Rpl9,Rps14,Rps16,Rps19,Rps29,Rps3a1,Rps4x,Rps5,Rps6,Rps8,Snu13,Rpl13a,Rpl27a,Rpl8,Rps3,Rpl7a,Rps11,Rpl3,Rrp9,Exosc5,Bysl,Rpp30,Rplp1,Ddx21,Rpl35a,Bud23,Rps21,Exosc1,Rpl14,Nop56,Rpl39,Rps20,Ddx47,Rpl4,Exosc6,Utp14a,Wdr75,Pelp1,Nop14,Las1l,Rpl18a,Tsr1,Rpl31,Dhx37,Bms1,Utp25,Wdr18,Heatr1,Exosc2,Nol6,Rps15a,Rpl23a,Tex10,Rpl13,Rpl5
2_Member	Reactome Gene Sets	R-MMU-156827	L13a-mediated translational silencing of Ceruloplasmin expression	-56.1635	-52.5652	54/108	13665,13669,13684,16341,16785,16898,18458,19921,19934,19942,19946,19988,19989,20005,20044,20055,20085,20090,20091,20102,20103,20104,20116,22121,26451,26905,26961,27050,27176,27207,27367,27979,53356,54709,55944,56040,57808,66085,66481,67115,67204,67248,67427,67891,73830,75705,76808,98221,114641,223691,267019,268449,270106,100503670	Eif2s1,Eif3a,Eif4e,Eif3e,Rpsa,Rps2,Pabpc1,Rpl19,Rpl22,Rpl27,Rpl30,Rpl6,Rpl7,Rpl9,Rps14,Rps16,Rps19,Rps29,Rps3a1,Rps4x,Rps5,Rps6,Rps8,Rpl13a,Rpl27a,Eif2s3x,Rpl8,Rps3,Rpl7a,Rps11,Rpl3,Eif3b,Eif3g,Eif3i,Eif3d,Rplp1,Rpl35a,Eif3f,Rps21,Rpl14,Eif2s2,Rpl39,Rps20,Rpl4,Eif3k,Eif4b,Rpl18a,Eif3m,Rpl31,Eif3l,Rps15a,Rpl23a,Rpl13,Rpl5
2_Member	Reactome Gene Sets	R-MMU-72613	Eukaryotic Translation Initiation	-55.5416	-52.0683	55/116	13665,13667,13669,13684,16341,16785,16898,18458,19921,19934,19942,19946,19988,19989,20005,20044,20055,20085,20090,20091,20102,20103,20104,20116,22121,26451,26905,26961,27050,27176,27207,27367,27979,53356,54709,55944,56040,57808,66085,66481,67115,67204,67248,67427,67891,73830,75705,76808,98221,114641,223691,267019,268449,270106,100503670	Eif2s1,Eif2b4,Eif3a,Eif4e,Eif3e,Rpsa,Rps2,Pabpc1,Rpl19,Rpl22,Rpl27,Rpl30,Rpl6,Rpl7,Rpl9,Rps14,Rps16,Rps19,Rps29,Rps3a1,Rps4x,Rps5,Rps6,Rps8,Rpl13a,Rpl27a,Eif2s3x,Rpl8,Rps3,Rpl7a,Rps11,Rpl3,Eif3b,Eif3g,Eif3i,Eif3d,Rplp1,Rpl35a,Eif3f,Rps21,Rpl14,Eif2s2,Rpl39,Rps20,Rpl4,Eif3k,Eif4b,Rpl18a,Eif3m,Rpl31,Eif3l,Rps15a,Rpl23a,Rpl13,Rpl5
2_Member	Reactome Gene Sets	R-MMU-8868773	rRNA processing in the nucleus and cytosol	-57.7795	-54.102	65/172	16785,16898,17975,18572,19921,19934,19942,19946,19988,19989,20005,20044,20055,20085,20090,20091,20102,20103,20104,20116,20826,22121,26451,26961,27050,27176,27207,27367,27966,27998,53414,54364,56040,56200,57808,66138,66481,66583,67115,67134,67248,67427,67755,67891,72544,72554,73674,75273,75416,76130,76808,104662,114641,208144,213895,215193,216156,217995,227715,230082,267019,268449,269536,270106,10…	Rpsa,Rps2,Ncl,Pdcd11,Rpl19,Rpl22,Rpl27,Rpl30,Rpl6,Rpl7,Rpl9,Rps14,Rps16,Rps19,Rps29,Rps3a1,Rps4x,Rps5,Rps6,Rps8,Snu13,Rpl13a,Rpl27a,Rpl8,Rps3,Rpl7a,Rps11,Rpl3,Rrp9,Exosc5,Bysl,Rpp30,Rplp1,Ddx21,Rpl35a,Bud23,Rps21,Exosc1,Rpl14,Nop56,Rpl39,Rps20,Ddx47,Rpl4,Exosc6,Utp14a,Wdr75,Pelp1,Nop14,Las1l,Rpl18a,Tsr1,Rpl31,Dhx37,Bms1,Utp25,Wdr18,Heatr1,Exosc2,Nol6,Rps15a,Rpl23a,Tex10,Rpl13,Rpl5
2_Member	Reactome Gene Sets	R-MMU-72706	GTP hydrolysis and joining of the 60S ribosomal subunit	-54.2691	-50.8469	53/109	13665,13669,13684,16341,16785,16898,19921,19934,19942,19946,19988,19989,20005,20044,20055,20085,20090,20091,20102,20103,20104,20116,22121,26451,26905,26961,27050,27176,27207,27367,27979,53356,54709,55944,56040,57808,66085,66481,67115,67204,67248,67427,67891,73830,75705,76808,98221,114641,223691,267019,268449,270106,100503670	Eif2s1,Eif3a,Eif4e,Eif3e,Rpsa,Rps2,Rpl19,Rpl22,Rpl27,Rpl30,Rpl6,Rpl7,Rpl9,Rps14,Rps16,Rps19,Rps29,Rps3a1,Rps4x,Rps5,Rps6,Rps8,Rpl13a,Rpl27a,Eif2s3x,Rpl8,Rps3,Rpl7a,Rps11,Rpl3,Eif3b,Eif3g,Eif3i,Eif3d,Rplp1,Rpl35a,Eif3f,Rps21,Rpl14,Eif2s2,Rpl39,Rps20,Rpl4,Eif3k,Eif4b,Rpl18a,Eif3m,Rpl31,Eif3l,Rps15a,Rpl23a,Rpl13,Rpl5
2_Member	Reactome Gene Sets	R-MMU-72689	Formation of a pool of free 40S subunits	-49.335	-45.9586	48/98	13669,16341,16785,16898,19921,19934,19942,19946,19988,19989,20005,20044,20055,20085,20090,20091,20102,20103,20104,20116,22121,26451,26961,27050,27176,27207,27367,27979,53356,54709,55944,56040,57808,66085,66481,67115,67248,67427,67891,73830,76808,98221,114641,223691,267019,268449,270106,100503670	Eif3a,Eif3e,Rpsa,Rps2,Rpl19,Rpl22,Rpl27,Rpl30,Rpl6,Rpl7,Rpl9,Rps14,Rps16,Rps19,Rps29,Rps3a1,Rps4x,Rps5,Rps6,Rps8,Rpl13a,Rpl27a,Rpl8,Rps3,Rpl7a,Rps11,Rpl3,Eif3b,Eif3g,Eif3i,Eif3d,Rplp1,Rpl35a,Eif3f,Rps21,Rpl14,Rpl39,Rps20,Rpl4,Eif3k,Rpl18a,Eif3m,Rpl31,Eif3l,Rps15a,Rpl23a,Rpl13,Rpl5
2_Member	Reactome Gene Sets	R-MMU-927802	Nonsense-Mediated Decay (NMD)	-41.581	-38.3185	45/111	16785,16898,18458,19704,19921,19934,19942,19946,19988,19989,20005,20044,20055,20085,20090,20091,20102,20103,20104,20116,22121,26451,26961,27050,27176,27207,27367,56040,57808,66481,67115,67248,67427,67891,71978,74133,76808,103677,114641,233789,267019,268449,270106,433702,100503670	Rpsa,Rps2,Pabpc1,Upf1,Rpl19,Rpl22,Rpl27,Rpl30,Rpl6,Rpl7,Rpl9,Rps14,Rps16,Rps19,Rps29,Rps3a1,Rps4x,Rps5,Rps6,Rps8,Rpl13a,Rpl27a,Rpl8,Rps3,Rpl7a,Rps11,Rpl3,Rplp1,Rpl35a,Rps21,Rpl14,Rpl39,Rps20,Rpl4,Ppp2r2a,Smg8,Rpl18a,Smg6,Rpl31,Smg1,Rps15a,Rpl23a,Rpl13,Ncbp1,Rpl5
2_Member	Reactome Gene Sets	R-MMU-975957	Nonsense Mediated Decay (NMD) enhanced by the Exon Junction Complex (EJC)	-41.581	-38.3185	45/111	16785,16898,18458,19704,19921,19934,19942,19946,19988,19989,20005,20044,20055,20085,20090,20091,20102,20103,20104,20116,22121,26451,26961,27050,27176,27207,27367,56040,57808,66481,67115,67248,67427,67891,71978,74133,76808,103677,114641,233789,267019,268449,270106,433702,100503670	Rpsa,Rps2,Pabpc1,Upf1,Rpl19,Rpl22,Rpl27,Rpl30,Rpl6,Rpl7,Rpl9,Rps14,Rps16,Rps19,Rps29,Rps3a1,Rps4x,Rps5,Rps6,Rps8,Rpl13a,Rpl27a,Rpl8,Rps3,Rpl7a,Rps11,Rpl3,Rplp1,Rpl35a,Rps21,Rpl14,Rpl39,Rps20,Rpl4,Ppp2r2a,Smg8,Rpl18a,Smg6,Rpl31,Smg1,Rps15a,Rpl23a,Rpl13,Ncbp1,Rpl5
2_Member	Reactome Gene Sets	R-MMU-72737	Cap-dependent Translation Initiation	-55.5416	-52.0683	55/116	13665,13667,13669,13684,16341,16785,16898,18458,19921,19934,19942,19946,19988,19989,20005,20044,20055,20085,20090,20091,20102,20103,20104,20116,22121,26451,26905,26961,27050,27176,27207,27367,27979,53356,54709,55944,56040,57808,66085,66481,67115,67204,67248,67427,67891,73830,75705,76808,98221,114641,223691,267019,268449,270106,100503670	Eif2s1,Eif2b4,Eif3a,Eif4e,Eif3e,Rpsa,Rps2,Pabpc1,Rpl19,Rpl22,Rpl27,Rpl30,Rpl6,Rpl7,Rpl9,Rps14,Rps16,Rps19,Rps29,Rps3a1,Rps4x,Rps5,Rps6,Rps8,Rpl13a,Rpl27a,Eif2s3x,Rpl8,Rps3,Rpl7a,Rps11,Rpl3,Eif3b,Eif3g,Eif3i,Eif3d,Rplp1,Rpl35a,Eif3f,Rps21,Rpl14,Eif2s2,Rpl39,Rps20,Rpl4,Eif3k,Eif4b,Rpl18a,Eif3m,Rpl31,Eif3l,Rps15a,Rpl23a,Rpl13,Rpl5
3_Summary	GO Biological Processes	GO:0034470	ncRNA processing	-62.8824	-58.807	63/355	16418,17089,17975,18148,18572,18813,19896,19942,19989,20044,20055,20085,20104,20116,20823,20826,27176,27966,27998,52530,53414,54364,56200,56417,57808,66138,66181,66254,66481,66583,66926,67053,67115,67755,69237,69663,69902,70044,72544,72554,73674,74195,75416,76130,83557,98956,100019,104662,107094,108707,109077,110109,117109,208144,213895,215193,216156,217995,227715,230082,245474,328162,100503670,1…	Eif6,Lyar,Ncl,Npm1,Pdcd11,Pa2g4,Rpl10a,Rpl27,Rpl7,Rps14,Rps16,Rps19,Rps6,Rps8,Ssb,Snu13,Rpl7a,Rrp9,Exosc5,Nhp2,Bysl,Rpp30,Ddx21,Adar,Rpl35a,Bud23,Nop10,Dimt1,Rps21,Exosc1,Trmt6,Rpp14,Rpl14,Ddx47,Gtpbp4,Ddx51,Mrto4,Tut1,Exosc6,Utp14a,Wdr75,Elp3,Nop14,Las1l,Lin28a,Nat10,Mdn1,Tsr1,Rrp12,Fam207a,Ints5,Nop2,Pop5,Dhx37,Bms1,Utp25,Wdr18,Heatr1,Exosc2,Nol6,Dkc1,Trmt61a,Rpl5,Csnk2a1,Csnk2b,Ran,Spata5,Nop5…
3_Member	GO Biological Processes	GO:0034470	ncRNA processing	-33.8316	-30.8701	63/355	16418,17089,17975,18148,18572,18813,19896,19942,19989,20044,20055,20085,20104,20116,20823,20826,27176,27966,27998,52530,53414,54364,56200,56417,57808,66138,66181,66254,66481,66583,66926,67053,67115,67755,69237,69663,69902,70044,72544,72554,73674,74195,75416,76130,83557,98956,100019,104662,107094,108707,109077,110109,117109,208144,213895,215193,216156,217995,227715,230082,245474,328162,100503670	Eif6,Lyar,Ncl,Npm1,Pdcd11,Pa2g4,Rpl10a,Rpl27,Rpl7,Rps14,Rps16,Rps19,Rps6,Rps8,Ssb,Snu13,Rpl7a,Rrp9,Exosc5,Nhp2,Bysl,Rpp30,Ddx21,Adar,Rpl35a,Bud23,Nop10,Dimt1,Rps21,Exosc1,Trmt6,Rpp14,Rpl14,Ddx47,Gtpbp4,Ddx51,Mrto4,Tut1,Exosc6,Utp14a,Wdr75,Elp3,Nop14,Las1l,Lin28a,Nat10,Mdn1,Tsr1,Rrp12,Fam207a,Ints5,Nop2,Pop5,Dhx37,Bms1,Utp25,Wdr18,Heatr1,Exosc2,Nol6,Dkc1,Trmt61a,Rpl5
3_Member	KEGG Pathway	mmu03008	Ribosome biogenesis in eukaryotes	-12.2213	-9.86193	22/122	12995,13001,16418,19384,20826,52530,54364,57815,66181,67134,69237,72554,73674,98956,100019,117109,213895,217995,224092,230082,230737,245474	Csnk2a1,Csnk2b,Eif6,Ran,Snu13,Nhp2,Rpp30,Spata5,Nop10,Nop56,Gtpbp4,Utp14a,Wdr75,Nat10,Mdn1,Pop5,Bms1,Heatr1,Lsg1,Nol6,Gnl2,Dkc1
3_Member	KEGG Pathway	ko03008	Ribosome biogenesis in eukaryotes	-12.6894	-10.2907	22/116	12995,13001,16418,19384,20826,52530,54364,57815,66181,67134,69237,72554,73674,98956,100019,117109,213895,217995,224092,230082,230737,245474	Csnk2a1,Csnk2b,Eif6,Ran,Snu13,Nhp2,Rpp30,Spata5,Nop10,Nop56,Gtpbp4,Utp14a,Wdr75,Nat10,Mdn1,Pop5,Bms1,Heatr1,Lsg1,Nol6,Gnl2,Dkc1
3_Member	GO Biological Processes	GO:0034660	ncRNA metabolic process	-33.9469	-30.9685	70/448	16418,17089,17975,18148,18572,18813,19896,19942,19989,20044,20055,20085,20104,20116,20823,20826,23874,27176,27966,27998,52530,53414,54364,56200,56417,57808,66044,66138,66181,66254,66481,66583,66926,67053,67115,67755,69237,69663,69902,70044,72544,72554,73674,74195,75416,76130,83557,85305,98956,100019,104662,107094,107508,108707,109077,110109,117109,208144,208718,213895,215193,216156,217995,227715,…	Eif6,Lyar,Ncl,Npm1,Pdcd11,Pa2g4,Rpl10a,Rpl27,Rpl7,Rps14,Rps16,Rps19,Rps6,Rps8,Ssb,Snu13,Farsb,Rpl7a,Rrp9,Exosc5,Nhp2,Bysl,Rpp30,Ddx21,Adar,Rpl35a,Dtd1,Bud23,Nop10,Dimt1,Rps21,Exosc1,Trmt6,Rpp14,Rpl14,Ddx47,Gtpbp4,Ddx51,Mrto4,Tut1,Exosc6,Utp14a,Wdr75,Elp3,Nop14,Las1l,Lin28a,Kars,Nat10,Mdn1,Tsr1,Rrp12,Eprs,Fam207a,Ints5,Nop2,Pop5,Dhx37,Dis3l2,Bms1,Utp25,Wdr18,Heatr1,Exosc2,Nol6,Dkc1,Trmt61a,Gars,Ia…
3_Member	GO Biological Processes	GO:0006364	rRNA processing	-38.1541	-34.9818	54/207	16418,17089,17975,18148,18572,18813,19896,19942,19989,20044,20055,20085,20104,20116,20826,27176,27966,27998,52530,53414,54364,56200,57808,66138,66181,66254,66481,66583,67115,67755,69237,69663,69902,72544,72554,73674,75416,76130,98956,100019,104662,107094,108707,110109,117109,208144,213895,215193,216156,217995,227715,230082,245474,100503670	Eif6,Lyar,Ncl,Npm1,Pdcd11,Pa2g4,Rpl10a,Rpl27,Rpl7,Rps14,Rps16,Rps19,Rps6,Rps8,Snu13,Rpl7a,Rrp9,Exosc5,Nhp2,Bysl,Rpp30,Ddx21,Rpl35a,Bud23,Nop10,Dimt1,Rps21,Exosc1,Rpl14,Ddx47,Gtpbp4,Ddx51,Mrto4,Exosc6,Utp14a,Wdr75,Nop14,Las1l,Nat10,Mdn1,Tsr1,Rrp12,Fam207a,Nop2,Pop5,Dhx37,Bms1,Utp25,Wdr18,Heatr1,Exosc2,Nol6,Dkc1,Rpl5
3_Member	GO Biological Processes	GO:0042254	ribosome biogenesis	-44.4068	-41.0718	68/294	16418,16785,16898,17089,17975,18148,18572,18813,19384,19896,19942,19988,19989,20044,20055,20085,20103,20104,20116,20826,22596,27176,27367,27966,27998,52530,53414,54364,56200,57808,66138,66181,66254,66481,66583,67115,67134,67755,69237,69663,69902,72544,72554,72584,73674,75416,76130,98956,100019,104662,107094,108707,110109,117109,208144,213895,215193,216156,217995,218629,224092,227715,229317,230082…	Eif6,Rpsa,Rps2,Lyar,Ncl,Npm1,Pdcd11,Pa2g4,Ran,Rpl10a,Rpl27,Rpl6,Rpl7,Rps14,Rps16,Rps19,Rps5,Rps6,Rps8,Snu13,Xrcc5,Rpl7a,Rpl3,Rrp9,Exosc5,Nhp2,Bysl,Rpp30,Ddx21,Rpl35a,Bud23,Nop10,Dimt1,Rps21,Exosc1,Rpl14,Nop56,Ddx47,Gtpbp4,Ddx51,Mrto4,Exosc6,Utp14a,Cul4b,Wdr75,Nop14,Las1l,Nat10,Mdn1,Tsr1,Rrp12,Fam207a,Nop2,Pop5,Dhx37,Bms1,Utp25,Wdr18,Heatr1,Dhx29,Lsg1,Exosc2,Eif2a,Nol6,Gnl2,Dkc1,Rpl23a,Rpl5
3_Member	GO Biological Processes	GO:0022613	ribonucleoprotein complex biogenesis	-62.8824	-58.807	95/408	13669,14105,15516,16418,16785,16898,17089,17975,18148,18572,18813,19384,19896,19942,19988,19989,20044,20055,20085,20103,20104,20116,20638,20641,20643,20815,20826,22121,22596,26905,27176,27367,27374,27966,27998,28035,50783,52530,53414,54364,55944,56200,56417,57808,66138,66181,66254,66481,66583,67115,67134,67204,67332,67755,67996,68011,68988,69237,69663,69878,69902,72544,72554,72584,73674,75416,757…	Eif3a,Srsf10,Hsp90ab1,Eif6,Rpsa,Rps2,Lyar,Ncl,Npm1,Pdcd11,Pa2g4,Ran,Rpl10a,Rpl27,Rpl6,Rpl7,Rps14,Rps16,Rps19,Rps5,Rps6,Rps8,Snrpb,Snrpd1,Snrpe,Srpk1,Snu13,Rpl13a,Xrcc5,Eif2s3x,Rpl7a,Rpl3,Prmt5,Rrp9,Exosc5,Usp39,Lsm4,Nhp2,Bysl,Rpp30,Eif3d,Ddx21,Adar,Rpl35a,Bud23,Nop10,Dimt1,Rps21,Exosc1,Rpl14,Nop56,Eif2s2,Snrpd3,Ddx47,Srsf6,Snrpg,Prpf31,Gtpbp4,Ddx51,Snrpf,Mrto4,Exosc6,Utp14a,Cul4b,Wdr75,Nop14,Eif4…
3_Member	GO Biological Processes	GO:0016072	rRNA metabolic process	-37.0953	-33.9493	54/216	16418,17089,17975,18148,18572,18813,19896,19942,19989,20044,20055,20085,20104,20116,20826,27176,27966,27998,52530,53414,54364,56200,57808,66138,66181,66254,66481,66583,67115,67755,69237,69663,69902,72544,72554,73674,75416,76130,98956,100019,104662,107094,108707,110109,117109,208144,213895,215193,216156,217995,227715,230082,245474,100503670	Eif6,Lyar,Ncl,Npm1,Pdcd11,Pa2g4,Rpl10a,Rpl27,Rpl7,Rps14,Rps16,Rps19,Rps6,Rps8,Snu13,Rpl7a,Rrp9,Exosc5,Nhp2,Bysl,Rpp30,Ddx21,Rpl35a,Bud23,Nop10,Dimt1,Rps21,Exosc1,Rpl14,Ddx47,Gtpbp4,Ddx51,Mrto4,Exosc6,Utp14a,Wdr75,Nop14,Las1l,Nat10,Mdn1,Tsr1,Rrp12,Fam207a,Nop2,Pop5,Dhx37,Bms1,Utp25,Wdr18,Heatr1,Exosc2,Nol6,Dkc1,Rpl5
4_Summary	GO Biological Processes	GO:0022618	ribonucleoprotein complex assembly	-29.6705	-26.7855	43/171	13669,14105,15516,16418,16785,16898,19988,20044,20085,20103,20638,20641,20643,20815,20826,22121,22596,26905,27367,27374,28035,50783,55944,56417,67204,67332,67996,68011,68988,69878,69902,75705,100019,107686,110109,216766,218629,237221,268449,276919,320632,433702,100503670,208144,229317	Eif3a,Srsf10,Hsp90ab1,Eif6,Rpsa,Rps2,Rpl6,Rps14,Rps19,Rps5,Snrpb,Snrpd1,Snrpe,Srpk1,Snu13,Rpl13a,Xrcc5,Eif2s3x,Rpl3,Prmt5,Usp39,Lsm4,Eif3d,Adar,Eif2s2,Snrpd3,Srsf6,Snrpg,Prpf31,Snrpf,Mrto4,Eif4b,Mdn1,Snrpd2,Nop2,Gemin5,Dhx29,Gemin8,Rpl23a,Gemin4,Snrnp200,Ncbp1,Rpl5,Dhx37,Eif2a
4_Member	GO Biological Processes	GO:0022618	ribonucleoprotein complex assembly	-29.6705	-26.7855	43/171	13669,14105,15516,16418,16785,16898,19988,20044,20085,20103,20638,20641,20643,20815,20826,22121,22596,26905,27367,27374,28035,50783,55944,56417,67204,67332,67996,68011,68988,69878,69902,75705,100019,107686,110109,216766,218629,237221,268449,276919,320632,433702,100503670	Eif3a,Srsf10,Hsp90ab1,Eif6,Rpsa,Rps2,Rpl6,Rps14,Rps19,Rps5,Snrpb,Snrpd1,Snrpe,Srpk1,Snu13,Rpl13a,Xrcc5,Eif2s3x,Rpl3,Prmt5,Usp39,Lsm4,Eif3d,Adar,Eif2s2,Snrpd3,Srsf6,Snrpg,Prpf31,Snrpf,Mrto4,Eif4b,Mdn1,Snrpd2,Nop2,Gemin5,Dhx29,Gemin8,Rpl23a,Gemin4,Snrnp200,Ncbp1,Rpl5
4_Member	GO Biological Processes	GO:0071826	ribonucleoprotein complex subunit organization	-28.8847	-26.0134	43/178	13669,14105,15516,16418,16785,16898,19988,20044,20085,20103,20638,20641,20643,20815,20826,22121,22596,26905,27367,27374,28035,50783,55944,56417,67204,67332,67996,68011,68988,69878,69902,75705,100019,107686,110109,216766,218629,237221,268449,276919,320632,433702,100503670	Eif3a,Srsf10,Hsp90ab1,Eif6,Rpsa,Rps2,Rpl6,Rps14,Rps19,Rps5,Snrpb,Snrpd1,Snrpe,Srpk1,Snu13,Rpl13a,Xrcc5,Eif2s3x,Rpl3,Prmt5,Usp39,Lsm4,Eif3d,Adar,Eif2s2,Snrpd3,Srsf6,Snrpg,Prpf31,Snrpf,Mrto4,Eif4b,Mdn1,Snrpd2,Nop2,Gemin5,Dhx29,Gemin8,Rpl23a,Gemin4,Snrnp200,Ncbp1,Rpl5
4_Member	GO Biological Processes	GO:0042255	ribosome assembly	-12.4785	-10.1021	17/64	16418,16785,16898,19988,20044,20085,20103,22596,27367,69902,100019,110109,208144,218629,229317,268449,100503670	Eif6,Rpsa,Rps2,Rpl6,Rps14,Rps19,Rps5,Xrcc5,Rpl3,Mrto4,Mdn1,Nop2,Dhx37,Dhx29,Eif2a,Rpl23a,Rpl5
4_Member	GO Biological Processes	GO:0000027	ribosomal large subunit assembly	-5.27474	-3.47925	7/28	19988,27367,69902,100019,110109,268449,100503670	Rpl6,Rpl3,Mrto4,Mdn1,Nop2,Rpl23a,Rpl5
5_Summary	GO Molecular Functions	GO:0043021	ribonucleoprotein complex binding	-18.79	-16.177	31/150	12995,13001,13665,14694,15387,16418,16785,18148,20638,20639,20641,20643,27374,56040,57808,66244,66897,67332,68011,68988,73830,74838,75705,83557,103677,107686,216766,218629,229317,276770,276919	Csnk2a1,Csnk2b,Eif2s1,Rack1,Hnrnpk,Eif6,Rpsa,Npm1,Snrpb,Snrpb2,Snrpd1,Snrpe,Prmt5,Rplp1,Rpl35a,Nemf,Naa16,Snrpd3,Snrpg,Prpf31,Eif3k,Naa15,Eif4b,Lin28a,Smg6,Snrpd2,Gemin5,Dhx29,Eif2a,Eif5a,Gemin4
5_Member	GO Molecular Functions	GO:0043021	ribonucleoprotein complex binding	-18.79	-16.177	31/150	12995,13001,13665,14694,15387,16418,16785,18148,20638,20639,20641,20643,27374,56040,57808,66244,66897,67332,68011,68988,73830,74838,75705,83557,103677,107686,216766,218629,229317,276770,276919	Csnk2a1,Csnk2b,Eif2s1,Rack1,Hnrnpk,Eif6,Rpsa,Npm1,Snrpb,Snrpb2,Snrpd1,Snrpe,Prmt5,Rplp1,Rpl35a,Nemf,Naa16,Snrpd3,Snrpg,Prpf31,Eif3k,Naa15,Eif4b,Lin28a,Smg6,Snrpd2,Gemin5,Dhx29,Eif2a,Eif5a,Gemin4
5_Member	GO Molecular Functions	GO:0043022	ribosome binding	-5.42269	-3.61565	10/62	13665,14694,16418,16785,66897,73830,74838,216766,229317,276770	Eif2s1,Rack1,Eif6,Rpsa,Naa16,Eif3k,Naa15,Gemin5,Eif2a,Eif5a
6_Summary	GO Biological Processes	GO:0042274	ribosomal small subunit biogenesis	-16.0549	-13.5173	21/73	16785,16898,18148,20044,20055,20085,20103,20104,20116,20826,22596,53414,66481,75416,98956,104662,108707,208144,213895,215193,217995,27966,52530,56200,66181,67134,245474	Rpsa,Rps2,Npm1,Rps14,Rps16,Rps19,Rps5,Rps6,Rps8,Snu13,Xrcc5,Bysl,Rps21,Nop14,Nat10,Tsr1,Fam207a,Dhx37,Bms1,Utp25,Heatr1,Rrp9,Nhp2,Ddx21,Nop10,Nop56,Dkc1
6_Member	GO Biological Processes	GO:0042274	ribosomal small subunit biogenesis	-16.0549	-13.5173	21/73	16785,16898,18148,20044,20055,20085,20103,20104,20116,20826,22596,53414,66481,75416,98956,104662,108707,208144,213895,215193,217995	Rpsa,Rps2,Npm1,Rps14,Rps16,Rps19,Rps5,Rps6,Rps8,Snu13,Xrcc5,Bysl,Rps21,Nop14,Nat10,Tsr1,Fam207a,Dhx37,Bms1,Utp25,Heatr1
6_Member	GO Molecular Functions	GO:0030515	snoRNA binding	-14.0783	-11.605	14/31	20826,22596,27966,52530,53414,56200,66181,67134,104662,208144,213895,215193,217995,245474	Snu13,Xrcc5,Rrp9,Nhp2,Bysl,Ddx21,Nop10,Nop56,Tsr1,Dhx37,Bms1,Utp25,Heatr1,Dkc1
6_Member	GO Biological Processes	GO:0030490	maturation of SSU-rRNA	-12.0808	-9.73378	15/49	20044,20055,20085,20116,20826,53414,66481,75416,98956,104662,108707,208144,213895,215193,217995	Rps14,Rps16,Rps19,Rps8,Snu13,Bysl,Rps21,Nop14,Nat10,Tsr1,Fam207a,Dhx37,Bms1,Utp25,Heatr1
6_Member	GO Biological Processes	GO:0000462	maturation of SSU-rRNA from tricistronic rRNA transcript (SSU-rRNA, 5.8S rRNA, LSU-rRNA)	-10.4409	-8.21066	12/35	20044,20055,20085,20116,53414,66481,104662,108707,208144,213895,215193,217995	Rps14,Rps16,Rps19,Rps8,Bysl,Rps21,Tsr1,Fam207a,Dhx37,Bms1,Utp25,Heatr1
6_Member	GO Molecular Functions	GO:0034511	U3 snoRNA binding	-9.09391	-6.92701	7/10	20826,22596,27966,104662,208144,213895,215193	Snu13,Xrcc5,Rrp9,Tsr1,Dhx37,Bms1,Utp25
7_Summary	GO Biological Processes	GO:0006413	translational initiation	-35.1929	-32.1589	23/104	13665,13667,13669,13684,16341,16418,16898,18148,22121,26905,27979,53356,54709,55944,66085,67204,73830,75705,98221,108989,218629,223691,433702,20085,20091,83557,23983,67160,229317,276770,18458,19934,20044,140486,16785,20055,20090,20102,20103,20104,20116,27050,27207,66481,67427,267019	Eif2s1,Eif2b4,Eif3a,Eif4e,Eif3e,Eif6,Rps2,Npm1,Rpl13a,Eif2s3x,Eif3b,Eif3g,Eif3i,Eif3d,Eif3f,Eif2s2,Eif3k,Eif4b,Eif3m,Tpr,Dhx29,Eif3l,Ncbp1,Rps19,Rps3a1,Lin28a,Pcbp1,Eef1g,Eif2a,Eif5a,Pabpc1,Rpl22,Rps14,Igf2bp1,Rpsa,Rps16,Rps29,Rps4x,Rps5,Rps6,Rps8,Rps3,Rps11,Rps21,Rps20,Rps15a
7_Member	GO Biological Processes	GO:0006413	translational initiation	-14.7685	-12.2613	23/104	13665,13667,13669,13684,16341,16418,16898,18148,22121,26905,27979,53356,54709,55944,66085,67204,73830,75705,98221,108989,218629,223691,433702	Eif2s1,Eif2b4,Eif3a,Eif4e,Eif3e,Eif6,Rps2,Npm1,Rpl13a,Eif2s3x,Eif3b,Eif3g,Eif3i,Eif3d,Eif3f,Eif2s2,Eif3k,Eif4b,Eif3m,Tpr,Dhx29,Eif3l,Ncbp1
7_Member	GO Molecular Functions	GO:0031369	translation initiation factor binding	-6.51954	-4.59184	9/37	13667,13684,20085,20091,27979,66085,67204,83557,98221	Eif2b4,Eif4e,Rps19,Rps3a1,Eif3b,Eif3f,Eif2s2,Lin28a,Eif3m
7_Member	GO Molecular Functions	GO:0090079	translation regulator activity, nucleic acid binding	-14.6019	-12.112	22/95	13665,13667,13669,13684,16341,16418,23983,26905,27979,53356,54709,55944,66085,67160,67204,73830,75705,98221,218629,223691,229317,276770	Eif2s1,Eif2b4,Eif3a,Eif4e,Eif3e,Eif6,Pcbp1,Eif2s3x,Eif3b,Eif3g,Eif3i,Eif3d,Eif3f,Eef1g,Eif2s2,Eif3k,Eif4b,Eif3m,Dhx29,Eif3l,Eif2a,Eif5a
7_Member	WikiPathways	WP307	Translation Factors	-14.6503	-12.1547	17/49	13665,13667,13669,13684,16341,16418,18458,26905,27979,53356,54709,55944,66085,67160,67204,75705,276770	Eif2s1,Eif2b4,Eif3a,Eif4e,Eif3e,Eif6,Pabpc1,Eif2s3x,Eif3b,Eif3g,Eif3i,Eif3d,Eif3f,Eef1g,Eif2s2,Eif4b,Eif5a
7_Member	GO Molecular Functions	GO:0008135	translation factor activity, RNA binding	-15.6579	-13.1266	21/76	13665,13667,13669,13684,16341,16418,26905,27979,53356,54709,55944,66085,67160,67204,73830,75705,98221,218629,223691,229317,276770	Eif2s1,Eif2b4,Eif3a,Eif4e,Eif3e,Eif6,Eif2s3x,Eif3b,Eif3g,Eif3i,Eif3d,Eif3f,Eef1g,Eif2s2,Eif3k,Eif4b,Eif3m,Dhx29,Eif3l,Eif2a,Eif5a
7_Member	GO Molecular Functions	GO:0045182	translation regulator activity	-14.7354	-12.2341	25/127	13665,13667,13669,13684,16341,16418,19934,20044,23983,26905,27979,53356,54709,55944,66085,67160,67204,73830,75705,98221,140486,218629,223691,229317,276770	Eif2s1,Eif2b4,Eif3a,Eif4e,Eif3e,Eif6,Rpl22,Rps14,Pcbp1,Eif2s3x,Eif3b,Eif3g,Eif3i,Eif3d,Eif3f,Eef1g,Eif2s2,Eif3k,Eif4b,Eif3m,Igf2bp1,Dhx29,Eif3l,Eif2a,Eif5a
7_Member	Reactome Gene Sets	R-MMU-72695	Formation of the ternary complex, and subsequently, the 43S complex	-32.4616	-29.5623	29/51	13665,13669,16341,16785,16898,20044,20055,20085,20090,20091,20102,20103,20104,20116,26905,27050,27207,27979,53356,54709,55944,66085,66481,67204,67427,73830,98221,223691,267019	Eif2s1,Eif3a,Eif3e,Rpsa,Rps2,Rps14,Rps16,Rps19,Rps29,Rps3a1,Rps4x,Rps5,Rps6,Rps8,Eif2s3x,Rps3,Rps11,Eif3b,Eif3g,Eif3i,Eif3d,Eif3f,Rps21,Eif2s2,Rps20,Eif3k,Eif3m,Eif3l,Rps15a
7_Member	Reactome Gene Sets	R-MMU-72702	Ribosomal scanning and start codon recognition	-33.5146	-30.5854	31/58	13665,13669,13684,16341,16785,16898,20044,20055,20085,20090,20091,20102,20103,20104,20116,26905,27050,27207,27979,53356,54709,55944,66085,66481,67204,67427,73830,75705,98221,223691,267019	Eif2s1,Eif3a,Eif4e,Eif3e,Rpsa,Rps2,Rps14,Rps16,Rps19,Rps29,Rps3a1,Rps4x,Rps5,Rps6,Rps8,Eif2s3x,Rps3,Rps11,Eif3b,Eif3g,Eif3i,Eif3d,Eif3f,Rps21,Eif2s2,Rps20,Eif3k,Eif4b,Eif3m,Eif3l,Rps15a
7_Member	Reactome Gene Sets	R-MMU-72662	Activation of the mRNA upon binding of the cap-binding complex and eIFs, and subsequent binding to 43S	-34.8637	-31.849	32/59	13665,13669,13684,16341,16785,16898,18458,20044,20055,20085,20090,20091,20102,20103,20104,20116,26905,27050,27207,27979,53356,54709,55944,66085,66481,67204,67427,73830,75705,98221,223691,267019	Eif2s1,Eif3a,Eif4e,Eif3e,Rpsa,Rps2,Pabpc1,Rps14,Rps16,Rps19,Rps29,Rps3a1,Rps4x,Rps5,Rps6,Rps8,Eif2s3x,Rps3,Rps11,Eif3b,Eif3g,Eif3i,Eif3d,Eif3f,Rps21,Eif2s2,Rps20,Eif3k,Eif4b,Eif3m,Eif3l,Rps15a
7_Member	Reactome Gene Sets	R-MMU-72649	Translation initiation complex formation	-35.1929	-32.1589	32/58	13665,13669,13684,16341,16785,16898,18458,20044,20055,20085,20090,20091,20102,20103,20104,20116,26905,27050,27207,27979,53356,54709,55944,66085,66481,67204,67427,73830,75705,98221,223691,267019	Eif2s1,Eif3a,Eif4e,Eif3e,Rpsa,Rps2,Pabpc1,Rps14,Rps16,Rps19,Rps29,Rps3a1,Rps4x,Rps5,Rps6,Rps8,Eif2s3x,Rps3,Rps11,Eif3b,Eif3g,Eif3i,Eif3d,Eif3f,Rps21,Eif2s2,Rps20,Eif3k,Eif4b,Eif3m,Eif3l,Rps15a
7_Member	GO Molecular Functions	GO:0003743	translation initiation factor activity	-17.7866	-15.181	19/47	13665,13667,13669,13684,16341,16418,26905,27979,53356,54709,55944,66085,67204,73830,75705,98221,218629,223691,229317	Eif2s1,Eif2b4,Eif3a,Eif4e,Eif3e,Eif6,Eif2s3x,Eif3b,Eif3g,Eif3i,Eif3d,Eif3f,Eif2s2,Eif3k,Eif4b,Eif3m,Dhx29,Eif3l,Eif2a
8_Summary	GO Biological Processes	GO:0042273	ribosomal large subunit biogenesis	-12.6773	-10.2877	18/72	16418,18148,19896,19988,19989,20826,27176,27367,52530,57808,67115,69237,69902,76130,100019,110109,268449,100503670	Eif6,Npm1,Rpl10a,Rpl6,Rpl7,Snu13,Rpl7a,Rpl3,Nhp2,Rpl35a,Rpl14,Gtpbp4,Mrto4,Las1l,Mdn1,Nop2,Rpl23a,Rpl5
8_Member	GO Biological Processes	GO:0042273	ribosomal large subunit biogenesis	-12.6773	-10.2877	18/72	16418,18148,19896,19988,19989,20826,27176,27367,52530,57808,67115,69237,69902,76130,100019,110109,268449,100503670	Eif6,Npm1,Rpl10a,Rpl6,Rpl7,Snu13,Rpl7a,Rpl3,Nhp2,Rpl35a,Rpl14,Gtpbp4,Mrto4,Las1l,Mdn1,Nop2,Rpl23a,Rpl5
8_Member	GO Biological Processes	GO:0000470	maturation of LSU-rRNA	-8.6555	-6.51208	10/30	16418,18148,19896,19989,20826,27176,52530,69237,76130,110109	Eif6,Npm1,Rpl10a,Rpl7,Snu13,Rpl7a,Nhp2,Gtpbp4,Las1l,Nop2
8_Member	GO Biological Processes	GO:0000463	maturation of LSU-rRNA from tricistronic rRNA transcript (SSU-rRNA, 5.8S rRNA, LSU-rRNA)	-2.13147	-0.716956	3/16	18148,19989,69237	Npm1,Rpl7,Gtpbp4
9_Summary	GO Biological Processes	GO:0006417	regulation of translation	-11.7352	-9.41184	36/351	13209,13665,13684,14433,14694,15388,16341,16418,17975,18148,18746,18813,19205,19704,19934,20091,22121,26905,27050,27979,53872,55944,56040,66244,69740,73830,83557,98956,107508,108989,140486,216766,229317,276770,433702,100503670,18648,66844,227102,21379,22608,56417,245474	Ddx6,Eif2s1,Eif4e,Gapdh,Rack1,Hnrnpl,Eif3e,Eif6,Ncl,Npm1,Pkm,Pa2g4,Ptbp1,Upf1,Rpl22,Rps3a1,Rpl13a,Eif2s3x,Rps3,Eif3b,Caprin1,Eif3d,Rplp1,Nemf,Dph5,Eif3k,Lin28a,Nat10,Eprs,Tpr,Igf2bp1,Gemin5,Eif2a,Eif5a,Ncbp1,Rpl5,Pgam1,Ormdl2,Ormdl1,Tbrg4,Ybx1,Adar,Dkc1
9_Member	GO Biological Processes	GO:0006417	regulation of translation	-11.7352	-9.41184	36/351	13209,13665,13684,14433,14694,15388,16341,16418,17975,18148,18746,18813,19205,19704,19934,20091,22121,26905,27050,27979,53872,55944,56040,66244,69740,73830,83557,98956,107508,108989,140486,216766,229317,276770,433702,100503670	Ddx6,Eif2s1,Eif4e,Gapdh,Rack1,Hnrnpl,Eif3e,Eif6,Ncl,Npm1,Pkm,Pa2g4,Ptbp1,Upf1,Rpl22,Rps3a1,Rpl13a,Eif2s3x,Rps3,Eif3b,Caprin1,Eif3d,Rplp1,Nemf,Dph5,Eif3k,Lin28a,Nat10,Eprs,Tpr,Igf2bp1,Gemin5,Eif2a,Eif5a,Ncbp1,Rpl5
9_Member	GO Biological Processes	GO:0034248	regulation of cellular amide metabolic process	-11.6385	-9.32283	39/410	13209,13665,13684,14433,14694,15388,16341,16418,17975,18148,18648,18746,18813,19205,19704,19934,20091,22121,26905,27050,27979,53872,55944,56040,66244,66844,69740,73830,83557,98956,107508,108989,140486,216766,227102,229317,276770,433702,100503670	Ddx6,Eif2s1,Eif4e,Gapdh,Rack1,Hnrnpl,Eif3e,Eif6,Ncl,Npm1,Pgam1,Pkm,Pa2g4,Ptbp1,Upf1,Rpl22,Rps3a1,Rpl13a,Eif2s3x,Rps3,Eif3b,Caprin1,Eif3d,Rplp1,Nemf,Ormdl2,Dph5,Eif3k,Lin28a,Nat10,Eprs,Tpr,Igf2bp1,Gemin5,Ormdl1,Eif2a,Eif5a,Ncbp1,Rpl5
9_Member	GO Biological Processes	GO:0010608	posttranscriptional regulation of gene expression	-8.53651	-6.40561	40/544	13209,13665,13684,14433,14694,15388,16341,16418,17975,18148,18746,18813,19205,19704,19934,20091,21379,22121,22608,26905,27050,27979,53872,55944,56040,56417,66244,69740,73830,83557,98956,107508,108989,140486,216766,229317,245474,276770,433702,100503670	Ddx6,Eif2s1,Eif4e,Gapdh,Rack1,Hnrnpl,Eif3e,Eif6,Ncl,Npm1,Pkm,Pa2g4,Ptbp1,Upf1,Rpl22,Rps3a1,Tbrg4,Rpl13a,Ybx1,Eif2s3x,Rps3,Eif3b,Caprin1,Eif3d,Rplp1,Adar,Nemf,Dph5,Eif3k,Lin28a,Nat10,Eprs,Tpr,Igf2bp1,Gemin5,Eif2a,Dkc1,Eif5a,Ncbp1,Rpl5
9_Member	GO Biological Processes	GO:0034249	negative regulation of cellular amide metabolic process	-5.73862	-3.90003	17/169	13209,13665,13684,14433,14694,16418,17975,19704,22121,27050,53872,66844,83557,107508,108989,140486,227102	Ddx6,Eif2s1,Eif4e,Gapdh,Rack1,Eif6,Ncl,Upf1,Rpl13a,Rps3,Caprin1,Ormdl2,Lin28a,Eprs,Tpr,Igf2bp1,Ormdl1
9_Member	GO Biological Processes	GO:0017148	negative regulation of translation	-5.24749	-3.45541	15/146	13209,13665,13684,14433,14694,16418,17975,19704,22121,27050,53872,83557,107508,108989,140486	Ddx6,Eif2s1,Eif4e,Gapdh,Rack1,Eif6,Ncl,Upf1,Rpl13a,Rps3,Caprin1,Lin28a,Eprs,Tpr,Igf2bp1
10_Summary	GO Biological Processes	GO:0016032	viral process	-9.48892	-7.31117	31/322	12018,12034,12648,13209,13669,15516,18145,18458,18571,18673,19205,19294,20586,20587,20815,20823,21973,22320,23983,26965,27354,27979,53356,55944,56417,66085,69550,109333,223691,229906,433759,14433,15510,21454	Bak1,Phb2,Chd1,Ddx6,Eif3a,Hsp90ab1,Npc1,Pabpc1,Pdcd6ip,Phb,Ptbp1,Nectin2,Smarca4,Smarcb1,Srpk1,Ssb,Top2a,Vamp8,Pcbp1,Cul1,Nbn,Eif3b,Eif3g,Eif3d,Adar,Eif3f,Bst2,Pkn2,Eif3l,Gtf2b,Hdac1,Gapdh,Hspd1,Tcp1
10_Member	GO Biological Processes	GO:0016032	viral process	-9.48892	-7.31117	31/322	12018,12034,12648,13209,13669,15516,18145,18458,18571,18673,19205,19294,20586,20587,20815,20823,21973,22320,23983,26965,27354,27979,53356,55944,56417,66085,69550,109333,223691,229906,433759	Bak1,Phb2,Chd1,Ddx6,Eif3a,Hsp90ab1,Npc1,Pabpc1,Pdcd6ip,Phb,Ptbp1,Nectin2,Smarca4,Smarcb1,Srpk1,Ssb,Top2a,Vamp8,Pcbp1,Cul1,Nbn,Eif3b,Eif3g,Eif3d,Adar,Eif3f,Bst2,Pkn2,Eif3l,Gtf2b,Hdac1
10_Member	GO Biological Processes	GO:0044403	biological process involved in symbiotic interaction	-9.20148	-7.0319	34/390	12018,12034,12648,13209,13669,14433,15510,15516,18145,18458,18571,18673,19205,19294,20586,20587,20815,20823,21454,21973,22320,23983,26965,27354,27979,53356,55944,56417,66085,69550,109333,223691,229906,433759	Bak1,Phb2,Chd1,Ddx6,Eif3a,Gapdh,Hspd1,Hsp90ab1,Npc1,Pabpc1,Pdcd6ip,Phb,Ptbp1,Nectin2,Smarca4,Smarcb1,Srpk1,Ssb,Tcp1,Top2a,Vamp8,Pcbp1,Cul1,Nbn,Eif3b,Eif3g,Eif3d,Adar,Eif3f,Bst2,Pkn2,Eif3l,Gtf2b,Hdac1
10_Member	GO Biological Processes	GO:0019058	viral life cycle	-3.47073	-1.86811	16/231	13209,15516,18145,18458,18571,18673,19294,20587,20815,21973,22320,23983,27354,56417,69550,109333	Ddx6,Hsp90ab1,Npc1,Pabpc1,Pdcd6ip,Phb,Nectin2,Smarcb1,Srpk1,Top2a,Vamp8,Pcbp1,Nbn,Adar,Bst2,Pkn2
10_Member	GO Biological Processes	GO:0045070	positive regulation of viral genome replication	-3.17645	-1.60554	5/28	18458,20815,21973,56417,109333	Pabpc1,Srpk1,Top2a,Adar,Pkn2
10_Member	GO Biological Processes	GO:0019079	viral genome replication	-2.51044	-1.03055	9/116	18458,18673,20587,20815,21973,23983,56417,69550,109333	Pabpc1,Phb,Smarcb1,Srpk1,Top2a,Pcbp1,Adar,Bst2,Pkn2
10_Member	GO Biological Processes	GO:0039694	viral RNA genome replication	-2.2092	-0.78218	4/29	18673,20587,21973,23983	Phb,Smarcb1,Top2a,Pcbp1
11_Summary	GO Biological Processes	GO:0019081	viral translation	-8.70855	-6.56258	8/16	13669,19205,20823,27979,53356,55944,66085,223691,12648,20586,20587,229906,433759,67204	Eif3a,Ptbp1,Ssb,Eif3b,Eif3g,Eif3d,Eif3f,Eif3l,Chd1,Smarca4,Smarcb1,Gtf2b,Hdac1,Eif2s2
11_Member	GO Biological Processes	GO:0019081	viral translation	-8.70855	-6.56258	8/16	13669,19205,20823,27979,53356,55944,66085,223691	Eif3a,Ptbp1,Ssb,Eif3b,Eif3g,Eif3d,Eif3f,Eif3l
11_Member	GO Biological Processes	GO:0019080	viral gene expression	-8.04347	-5.94121	13/65	12648,13669,19205,20586,20587,20823,27979,53356,55944,66085,223691,229906,433759	Chd1,Eif3a,Ptbp1,Smarca4,Smarcb1,Ssb,Eif3b,Eif3g,Eif3d,Eif3f,Eif3l,Gtf2b,Hdac1
11_Member	GO Biological Processes	GO:0075525	viral translational termination-reinitiation	-7.95586	-5.86048	5/5	13669,27979,53356,55944,223691	Eif3a,Eif3b,Eif3g,Eif3d,Eif3l
11_Member	GO Biological Processes	GO:0075522	IRES-dependent viral translational initiation	-6.93264	-4.96276	6/11	13669,19205,20823,27979,55944,66085	Eif3a,Ptbp1,Ssb,Eif3b,Eif3d,Eif3f
11_Member	GO Biological Processes	GO:0001732	formation of cytoplasmic translation initiation complex	-4.17747	-2.4832	3/4	13669,55944,67204	Eif3a,Eif3d,Eif2s2
12_Summary	WikiPathways	WP1763	PluriNetWork: mechanisms associated with pluripotency	-8.58777	-6.4494	28/292	11545,12387,12550,13436,13590,16211,17089,17128,17975,18747,20466,20586,20833,22083,22289,22589,66317,66830,69719,76007,93762,94093,99377,226442,235497,245688,381022,433759,12648,13001,18148,18971,19704,20020,21973,22608,27374,50708,56456,67196,70099,75273,100088,108989,114741,229906,269966,380664,381760	Parp1,Ctnnb1,Cdh1,Dnmt3b,Lefty1,Kpnb1,Lyar,Smad4,Ncl,Prkaca,Sin3a,Smarca4,Ssrp1,Ctr9,Kdm6a,Atrx,Wdr61,Nacc1,Cad,Zmym2,Smarca5,Trim33,Sall4,Zfp281,Leo1,Rbbp7,Kmt2d,Hdac1,Chd1,Csnk2b,Npm1,Pold1,Upf1,Polr2a,Top2a,Ybx1,Prmt5,H1f2,Actl6a,Ube2t,Smc4,Pelp1,Rcc1,Tpr,Supt16,Gtf2b,Nup98,Lemd3,Ssbp1
12_Member	WikiPathways	WP1763	PluriNetWork: mechanisms associated with pluripotency	-8.58777	-6.4494	28/292	11545,12387,12550,13436,13590,16211,17089,17128,17975,18747,20466,20586,20833,22083,22289,22589,66317,66830,69719,76007,93762,94093,99377,226442,235497,245688,381022,433759	Parp1,Ctnnb1,Cdh1,Dnmt3b,Lefty1,Kpnb1,Lyar,Smad4,Ncl,Prkaca,Sin3a,Smarca4,Ssrp1,Ctr9,Kdm6a,Atrx,Wdr61,Nacc1,Cad,Zmym2,Smarca5,Trim33,Sall4,Zfp281,Leo1,Rbbp7,Kmt2d,Hdac1
12_Member	GO Molecular Functions	GO:0003682	chromatin binding	-3.46825	-1.86636	32/646	11545,12387,12648,13001,13436,17128,18148,18971,19704,20020,20466,20586,20833,21973,22289,22589,22608,27374,50708,56456,67196,70099,75273,93762,100088,108989,114741,229906,269966,380664,381760,433759	Parp1,Ctnnb1,Chd1,Csnk2b,Dnmt3b,Smad4,Npm1,Pold1,Upf1,Polr2a,Sin3a,Smarca4,Ssrp1,Top2a,Kdm6a,Atrx,Ybx1,Prmt5,H1f2,Actl6a,Ube2t,Smc4,Pelp1,Smarca5,Rcc1,Tpr,Supt16,Gtf2b,Nup98,Lemd3,Ssbp1,Hdac1
13_Summary	GO Biological Processes	GO:0071166	ribonucleoprotein complex localization	-28.7113	-25.8664	14/71	16418,18148,19384,20823,59015,68988,71805,103468,108989,224092,230082,234865,276770,433702,12462,12469,70699,72621,72787,226747,269966,54563,69482,69912,71844,72124,227699,240087,269113,13436,15387,20466,21973,69386,433759,20020,68024,245841,319168,15505,15382,140486,225027,13726,70099,380664,14228,15516,19294,20085,66870,70769,93684,103554,18747,55948,56417,65246,68051,74204,11674,13806,14433,14…	Eif6,Npm1,Ran,Ssb,Nup160,Prpf31,Nup93,Nup107,Tpr,Lsg1,Nol6,Nup133,Eif5a,Ncbp1,Cct3,Cct8,Nup205,Pdzd11,Ndc1,Ahctf1,Nup98,Nup210,Nup35,Nup43,Nupl1,Seh1l,Nup188,Mdc1,Nup54,Dnmt3b,Hnrnpk,Sin3a,Top2a,H4c8,Hdac1,Polr2a,H2bc4,Polr2h,H2ac12,Hsph1,Hnrnpa1,Igf2bp1,Srsf7,Emd,Smc4,Lemd3,Fkbp4,Hsp90ab1,Nectin2,Rps19,Serbp1,Nolc1,Selenof,Psme4,Prkaca,Sfn,Adar,Xpo7,Nutf2,Xpo6,Aldoa,Eno1,Gapdh,Galk1,Got1,Pfkl,Pg…
13_Member	GO Biological Processes	GO:0071166	ribonucleoprotein complex localization	-8.53061	-6.40217	14/71	16418,18148,19384,20823,59015,68988,71805,103468,108989,224092,230082,234865,276770,433702	Eif6,Npm1,Ran,Ssb,Nup160,Prpf31,Nup93,Nup107,Tpr,Lsg1,Nol6,Nup133,Eif5a,Ncbp1
13_Member	GO Biological Processes	GO:0046931	pore complex assembly	-8.56257	-6.42919	9/23	12462,12469,70699,71805,72621,72787,103468,226747,269966	Cct3,Cct8,Nup205,Nup93,Pdzd11,Ndc1,Nup107,Ahctf1,Nup98
13_Member	Reactome Gene Sets	R-MMU-3108214	SUMOylation of DNA damage response and repair proteins	-9.452	-7.27698	15/72	54563,59015,69482,69912,71805,71844,72124,72787,103468,108989,227699,234865,240087,269113,269966	Nup210,Nup160,Nup35,Nup43,Nup93,Nupl1,Seh1l,Ndc1,Nup107,Tpr,Nup188,Nup133,Mdc1,Nup54,Nup98
13_Member	Reactome Gene Sets	R-MMU-2990846	SUMOylation	-9.80651	-7.60329	22/160	13436,15387,18148,20466,21973,54563,59015,69386,69482,69912,71805,71844,72124,72787,103468,108989,227699,234865,240087,269113,269966,433759	Dnmt3b,Hnrnpk,Npm1,Sin3a,Top2a,Nup210,Nup160,H4c8,Nup35,Nup43,Nup93,Nupl1,Seh1l,Ndc1,Nup107,Tpr,Nup188,Nup133,Mdc1,Nup54,Nup98,Hdac1
13_Member	Reactome Gene Sets	R-MMU-3108232	SUMO E3 ligases SUMOylate target proteins	-10.0803	-7.86822	22/155	13436,15387,18148,20466,21973,54563,59015,69386,69482,69912,71805,71844,72124,72787,103468,108989,227699,234865,240087,269113,269966,433759	Dnmt3b,Hnrnpk,Npm1,Sin3a,Top2a,Nup210,Nup160,H4c8,Nup35,Nup43,Nup93,Nupl1,Seh1l,Ndc1,Nup107,Tpr,Nup188,Nup133,Mdc1,Nup54,Nup98,Hdac1
13_Member	Reactome Gene Sets	R-MMU-211000	Gene Silencing by RNA	-10.5811	-8.34139	20/119	19384,20020,54563,59015,68024,69386,69482,69912,71805,71844,72124,72787,103468,108989,227699,234865,245841,269113,269966,319168	Ran,Polr2a,Nup210,Nup160,H2bc4,H4c8,Nup35,Nup43,Nup93,Nupl1,Seh1l,Ndc1,Nup107,Tpr,Nup188,Nup133,Polr2h,Nup54,Nup98,H2ac12
13_Member	Reactome Gene Sets	R-MMU-3371453	Regulation of HSF1-mediated heat shock response	-10.2297	-8.01166	15/64	15505,54563,59015,69482,69912,71805,71844,72124,72787,103468,108989,227699,234865,269113,269966	Hsph1,Nup210,Nup160,Nup35,Nup43,Nup93,Nupl1,Seh1l,Ndc1,Nup107,Tpr,Nup188,Nup133,Nup54,Nup98
13_Member	GO Biological Processes	GO:0051028	mRNA transport	-10.3696	-8.14242	19/109	15382,54563,59015,69482,69912,71805,72124,72787,103468,108989,140486,225027,226747,227699,234865,269113,269966,276770,433702	Hnrnpa1,Nup210,Nup160,Nup35,Nup43,Nup93,Seh1l,Ndc1,Nup107,Tpr,Igf2bp1,Srsf7,Ahctf1,Nup188,Nup133,Nup54,Nup98,Eif5a,Ncbp1
13_Member	Reactome Gene Sets	R-MMU-68875	Mitotic Prophase	-10.4442	-8.21076	20/121	13726,54563,59015,68024,69386,69482,69912,70099,71805,71844,72124,72787,103468,108989,227699,234865,269113,269966,319168,380664	Emd,Nup210,Nup160,H2bc4,H4c8,Nup35,Nup43,Smc4,Nup93,Nupl1,Seh1l,Ndc1,Nup107,Tpr,Nup188,Nup133,Nup54,Nup98,H2ac12,Lemd3
13_Member	Reactome Gene Sets	R-MMU-3371556	Cellular response to heat stress	-10.5944	-8.35156	17/82	14228,15505,15516,54563,59015,69482,69912,71805,71844,72124,72787,103468,108989,227699,234865,269113,269966	Fkbp4,Hsph1,Hsp90ab1,Nup210,Nup160,Nup35,Nup43,Nup93,Nupl1,Seh1l,Ndc1,Nup107,Tpr,Nup188,Nup133,Nup54,Nup98
13_Member	GO Biological Processes	GO:0006997	nucleus organization	-8.34995	-6.22639	18/127	13726,19294,20085,66870,69482,70699,70769,71805,72124,72787,93684,103468,103554,226747,234865,269113,269966,380664	Emd,Nectin2,Rps19,Serbp1,Nup35,Nup205,Nolc1,Nup93,Seh1l,Ndc1,Selenof,Nup107,Psme4,Ahctf1,Nup133,Nup54,Nup98,Lemd3
13_Member	GO Biological Processes	GO:0006611	protein export from nucleus	-10.1786	-7.9636	20/125	13726,16418,18148,18747,19384,20823,55948,56417,59015,65246,68051,71805,74204,103468,108989,224092,230082,234865,276770,433702	Emd,Eif6,Npm1,Prkaca,Ran,Ssb,Sfn,Adar,Nup160,Xpo7,Nutf2,Nup93,Xpo6,Nup107,Tpr,Lsg1,Nol6,Nup133,Eif5a,Ncbp1
13_Member	GO Biological Processes	GO:0051292	nuclear pore complex assembly	-7.65387	-5.5969	6/9	70699,71805,72787,103468,226747,269966	Nup205,Nup93,Ndc1,Nup107,Ahctf1,Nup98
13_Member	GO Biological Processes	GO:0071427	mRNA-containing ribonucleoprotein complex export from nucleus	-3.5065	-1.89276	7/51	59015,71805,103468,108989,234865,276770,433702	Nup160,Nup93,Nup107,Tpr,Nup133,Eif5a,Ncbp1
13_Member	GO Biological Processes	GO:0006405	RNA export from nucleus	-7.5436	-5.49963	14/84	16418,18148,19384,20823,59015,71805,103468,108989,224092,227699,230082,234865,276770,433702	Eif6,Npm1,Ran,Ssb,Nup160,Nup93,Nup107,Tpr,Lsg1,Nup188,Nol6,Nup133,Eif5a,Ncbp1
13_Member	Reactome Gene Sets	R-MMU-71387	Metabolism of carbohydrates	-7.09983	-5.11081	24/261	11674,13806,14433,14635,14718,18641,18648,18746,20525,21881,54563,59015,69482,69912,71805,71844,72124,72787,103468,108989,227699,234865,269113,269966	Aldoa,Eno1,Gapdh,Galk1,Got1,Pfkl,Pgam1,Pkm,Slc2a1,Tkt,Nup210,Nup160,Nup35,Nup43,Nup93,Nupl1,Seh1l,Ndc1,Nup107,Tpr,Nup188,Nup133,Nup54,Nup98
13_Member	GO Biological Processes	GO:0031503	protein-containing complex localization	-5.46028	-3.64616	21/257	13383,13436,14228,16418,17920,18148,19384,20619,20823,22350,59015,71805,72124,72787,103468,108989,224092,230082,234865,276770,433702	Dlg1,Dnmt3b,Fkbp4,Eif6,Myo6,Npm1,Ran,Snap23,Ssb,Ezr,Nup160,Nup93,Seh1l,Ndc1,Nup107,Tpr,Lsg1,Nol6,Nup133,Eif5a,Ncbp1
13_Member	Reactome Gene Sets	R-MMU-141424	Amplification of signal from the kinetochores	-5.43169	-3.62113	12/91	12615,17120,18221,19053,59015,69912,72124,103468,226747,234865,236930,269966	Cenpa,Mad1l1,Nudc,Ppp2cb,Nup160,Nup43,Seh1l,Nup107,Ahctf1,Nup133,Ercc6l,Nup98
13_Member	Reactome Gene Sets	R-MMU-141444	Amplification of signal from unattached kinetochores via a MAD2 inhibitory signal	-5.43169	-3.62113	12/91	12615,17120,18221,19053,59015,69912,72124,103468,226747,234865,236930,269966	Cenpa,Mad1l1,Nudc,Ppp2cb,Nup160,Nup43,Seh1l,Nup107,Ahctf1,Nup133,Ercc6l,Nup98
13_Member	Reactome Gene Sets	R-MMU-69618	Mitotic Spindle Checkpoint	-5.38283	-3.57928	13/108	12615,17120,18221,19053,59015,69912,69957,72124,103468,226747,234865,236930,269966	Cenpa,Mad1l1,Nudc,Ppp2cb,Nup160,Nup43,Cdc16,Seh1l,Nup107,Ahctf1,Nup133,Ercc6l,Nup98
13_Member	Reactome Gene Sets	R-MMU-68877	Mitotic Prometaphase	-5.07876	-3.30332	17/189	12615,12995,13001,17120,18221,18747,19053,59015,69912,70099,72124,103468,226747,230376,234865,236930,269966	Cenpa,Csnk2a1,Csnk2b,Mad1l1,Nudc,Prkaca,Ppp2cb,Nup160,Nup43,Smc4,Seh1l,Nup107,Ahctf1,Haus6,Nup133,Ercc6l,Nup98
13_Member	Reactome Gene Sets	R-MMU-9648025	EML4 and NUDC in mitotic spindle formation	-4.69807	-2.95513	12/107	12615,17120,18221,19053,59015,69912,72124,103468,226747,234865,236930,269966	Cenpa,Mad1l1,Nudc,Ppp2cb,Nup160,Nup43,Seh1l,Nup107,Ahctf1,Nup133,Ercc6l,Nup98
13_Member	Reactome Gene Sets	R-MMU-2500257	Resolution of Sister Chromatid Cohesion	-4.27216	-2.56969	12/118	12615,17120,18221,19053,59015,69912,72124,103468,226747,234865,236930,269966	Cenpa,Mad1l1,Nudc,Ppp2cb,Nup160,Nup43,Seh1l,Nup107,Ahctf1,Nup133,Ercc6l,Nup98
13_Member	Reactome Gene Sets	R-MMU-5663220	RHO GTPases Activate Formins	-3.80124	-2.1425	12/132	12615,17120,18221,19053,59015,69912,72124,103468,226747,234865,236930,269966	Cenpa,Mad1l1,Nudc,Ppp2cb,Nup160,Nup43,Seh1l,Nup107,Ahctf1,Nup133,Ercc6l,Nup98
13_Member	GO Biological Processes	GO:0006406	mRNA export from nucleus	-3.5065	-1.89276	7/51	59015,71805,103468,108989,234865,276770,433702	Nup160,Nup93,Nup107,Tpr,Nup133,Eif5a,Ncbp1
13_Member	GO Biological Processes	GO:0051168	nuclear export	-10.8481	-8.59226	22/142	13726,16418,18148,18747,19384,20823,55948,56417,59015,65246,66244,68051,71805,74204,103468,108989,224092,227699,230082,234865,276770,433702	Emd,Eif6,Npm1,Prkaca,Ran,Ssb,Sfn,Adar,Nup160,Xpo7,Nemf,Nutf2,Nup93,Xpo6,Nup107,Tpr,Lsg1,Nup188,Nol6,Nup133,Eif5a,Ncbp1
13_Member	GO Biological Processes	GO:0071426	ribonucleoprotein complex export from nucleus	-7.63348	-5.58135	13/70	16418,18148,19384,20823,59015,71805,103468,108989,224092,230082,234865,276770,433702	Eif6,Npm1,Ran,Ssb,Nup160,Nup93,Nup107,Tpr,Lsg1,Nol6,Nup133,Eif5a,Ncbp1
13_Member	GO Biological Processes	GO:0015931	nucleobase-containing compound transport	-10.9146	-8.65549	26/200	15382,16418,18148,19384,20823,22608,54563,59015,69482,69912,71805,72124,72787,103468,108989,140486,224092,225027,226747,227699,230082,234865,269113,269966,276770,433702	Hnrnpa1,Eif6,Npm1,Ran,Ssb,Ybx1,Nup210,Nup160,Nup35,Nup43,Nup93,Seh1l,Ndc1,Nup107,Tpr,Igf2bp1,Lsg1,Srsf7,Ahctf1,Nup188,Nol6,Nup133,Nup54,Nup98,Eif5a,Ncbp1
13_Member	Reactome Gene Sets	R-MMU-5578749	Transcriptional regulation by small RNAs	-11.1592	-8.87265	20/111	19384,20020,54563,59015,68024,69386,69482,69912,71805,71844,72124,72787,103468,108989,227699,234865,245841,269113,269966,319168	Ran,Polr2a,Nup210,Nup160,H2bc4,H4c8,Nup35,Nup43,Nup93,Nupl1,Seh1l,Ndc1,Nup107,Tpr,Nup188,Nup133,Polr2h,Nup54,Nup98,H2ac12
13_Member	Reactome Gene Sets	R-MMU-4551638	SUMOylation of chromatin organization proteins	-11.2238	-8.93017	16/65	54563,59015,69386,69482,69912,71805,71844,72124,72787,103468,108989,227699,234865,269113,269966,433759	Nup210,Nup160,H4c8,Nup35,Nup43,Nup93,Nupl1,Seh1l,Ndc1,Nup107,Tpr,Nup188,Nup133,Nup54,Nup98,Hdac1
13_Member	Reactome Gene Sets	R-MMU-191859	snRNP Assembly	-28.7113	-25.8664	26/47	20638,20641,20643,27374,54563,59015,67332,68011,69482,69878,69912,70465,71805,71844,72124,72787,103468,107686,108989,216766,227699,234865,237221,269113,269966,276919	Snrpb,Snrpd1,Snrpe,Prmt5,Nup210,Nup160,Snrpd3,Snrpg,Nup35,Snrpf,Nup43,Wdr77,Nup93,Nupl1,Seh1l,Ndc1,Nup107,Snrpd2,Tpr,Gemin5,Nup188,Nup133,Gemin8,Nup54,Nup98,Gemin4
13_Member	Reactome Gene Sets	R-MMU-194441	Metabolism of non-coding RNA	-28.7113	-25.8664	26/47	20638,20641,20643,27374,54563,59015,67332,68011,69482,69878,69912,70465,71805,71844,72124,72787,103468,107686,108989,216766,227699,234865,237221,269113,269966,276919	Snrpb,Snrpd1,Snrpe,Prmt5,Nup210,Nup160,Snrpd3,Snrpg,Nup35,Snrpf,Nup43,Wdr77,Nup93,Nupl1,Seh1l,Ndc1,Nup107,Snrpd2,Tpr,Gemin5,Nup188,Nup133,Gemin8,Nup54,Nup98,Gemin4
13_Member	KEGG Pathway	ko03013	RNA transport	-27.8546	-25.0222	41/167	13665,13667,13669,13684,16211,16341,18458,18949,19384,19704,26905,27374,27979,53356,54364,54563,54709,55944,59015,66085,67053,67204,69482,69912,70699,71805,71844,72124,72787,75705,103468,108989,117109,216766,227699,234865,237221,269113,269966,276919,433702	Eif2s1,Eif2b4,Eif3a,Eif4e,Kpnb1,Eif3e,Pabpc1,Pnn,Ran,Upf1,Eif2s3x,Prmt5,Eif3b,Eif3g,Rpp30,Nup210,Eif3i,Eif3d,Nup160,Eif3f,Rpp14,Eif2s2,Nup35,Nup43,Nup205,Nup93,Nupl1,Seh1l,Ndc1,Eif4b,Nup107,Tpr,Pop5,Gemin5,Nup188,Nup133,Gemin8,Nup54,Nup98,Gemin4,Ncbp1
13_Member	KEGG Pathway	mmu03013	RNA transport	-27.6329	-24.8363	41/169	13665,13667,13669,13684,16211,16341,18458,18949,19384,19704,26905,27374,27979,53356,54364,54563,54709,55944,59015,66085,67053,67204,69482,69912,70699,71805,71844,72124,72787,75705,103468,108989,117109,216766,227699,234865,237221,269113,269966,276919,433702	Eif2s1,Eif2b4,Eif3a,Eif4e,Kpnb1,Eif3e,Pabpc1,Pnn,Ran,Upf1,Eif2s3x,Prmt5,Eif3b,Eif3g,Rpp30,Nup210,Eif3i,Eif3d,Nup160,Eif3f,Rpp14,Eif2s2,Nup35,Nup43,Nup205,Nup93,Nupl1,Seh1l,Ndc1,Eif4b,Nup107,Tpr,Pop5,Gemin5,Nup188,Nup133,Gemin8,Nup54,Nup98,Gemin4,Ncbp1
13_Member	Reactome Gene Sets	R-MMU-159231	Transport of Mature mRNA Derived from an Intronless Transcript	-19.4393	-16.7789	19/40	13684,51786,54451,54563,59015,69482,69912,71805,71844,72124,72787,94230,103468,108989,227699,234865,269113,269966,433702	Eif4e,Cpsf2,Cpsf3,Nup210,Nup160,Nup35,Nup43,Nup93,Nupl1,Seh1l,Ndc1,Cpsf1,Nup107,Tpr,Nup188,Nup133,Nup54,Nup98,Ncbp1
13_Member	Reactome Gene Sets	R-MMU-159234	Transport of Mature mRNAs Derived from Intronless Transcripts	-19.1793	-16.5271	19/41	13684,51786,54451,54563,59015,69482,69912,71805,71844,72124,72787,94230,103468,108989,227699,234865,269113,269966,433702	Eif4e,Cpsf2,Cpsf3,Nup210,Nup160,Nup35,Nup43,Nup93,Nupl1,Seh1l,Ndc1,Cpsf1,Nup107,Tpr,Nup188,Nup133,Nup54,Nup98,Ncbp1
13_Member	Reactome Gene Sets	R-MMU-159227	Transport of the SLBP independent Mature mRNA	-16.6383	-14.0612	16/33	13684,54563,59015,69482,69912,71805,71844,72124,72787,103468,108989,227699,234865,269113,269966,433702	Eif4e,Nup210,Nup160,Nup35,Nup43,Nup93,Nupl1,Seh1l,Ndc1,Nup107,Tpr,Nup188,Nup133,Nup54,Nup98,Ncbp1
13_Member	GO Biological Processes	GO:0006403	RNA localization	-16.3893	-13.8258	31/180	12461,12464,15382,16418,18148,19384,20823,21454,22608,54563,59015,69482,69912,71805,72124,72787,103468,108989,140486,224092,225027,226747,227699,227715,230082,234865,245474,269113,269966,276770,433702	Cct2,Cct4,Hnrnpa1,Eif6,Npm1,Ran,Ssb,Tcp1,Ybx1,Nup210,Nup160,Nup35,Nup43,Nup93,Seh1l,Ndc1,Nup107,Tpr,Igf2bp1,Lsg1,Srsf7,Ahctf1,Nup188,Exosc2,Nol6,Nup133,Dkc1,Nup54,Nup98,Eif5a,Ncbp1
13_Member	Reactome Gene Sets	R-MMU-159230	Transport of the SLBP Dependant Mature mRNA	-16.3724	-13.8156	16/34	13684,54563,59015,69482,69912,71805,71844,72124,72787,103468,108989,227699,234865,269113,269966,433702	Eif4e,Nup210,Nup160,Nup35,Nup43,Nup93,Nupl1,Seh1l,Ndc1,Nup107,Tpr,Nup188,Nup133,Nup54,Nup98,Ncbp1
13_Member	Reactome Gene Sets	R-MMU-72202	Transport of Mature Transcript to Cytoplasm	-16.3265	-13.7761	22/80	13684,51786,54451,54563,59015,67996,69482,69912,71805,71844,72124,72787,94230,103468,108014,108989,225027,227699,234865,269113,269966,433702	Eif4e,Cpsf2,Cpsf3,Nup210,Nup160,Srsf6,Nup35,Nup43,Nup93,Nupl1,Seh1l,Ndc1,Cpsf1,Nup107,Srsf9,Tpr,Srsf7,Nup188,Nup133,Nup54,Nup98,Ncbp1
13_Member	Reactome Gene Sets	R-MMU-9615933	Postmitotic nuclear pore complex (NPC) reformation	-15.5005	-12.9754	13/21	19384,59015,69482,69912,71805,72124,72787,100088,103468,226747,227699,234865,269966	Ran,Nup160,Nup35,Nup43,Nup93,Seh1l,Ndc1,Rcc1,Nup107,Ahctf1,Nup188,Nup133,Nup98
13_Member	Reactome Gene Sets	R-MMU-70326	Glucose metabolism	-15.1584	-12.6394	21/80	11674,13806,14433,14718,18641,18648,18746,54563,59015,69482,69912,71805,71844,72124,72787,103468,108989,227699,234865,269113,269966	Aldoa,Eno1,Gapdh,Got1,Pfkl,Pgam1,Pkm,Nup210,Nup160,Nup35,Nup43,Nup93,Nupl1,Seh1l,Ndc1,Nup107,Tpr,Nup188,Nup133,Nup54,Nup98
13_Member	GO Molecular Functions	GO:0017056	structural constituent of nuclear pore	-14.7711	-12.2613	13/23	59015,68051,69482,70699,71805,71844,72787,103468,108989,227699,234865,269113,269966	Nup160,Nutf2,Nup35,Nup205,Nup93,Nupl1,Ndc1,Nup107,Tpr,Nup188,Nup133,Nup54,Nup98
13_Member	Reactome Gene Sets	R-MMU-70171	Glycolysis	-16.5751	-14.0049	20/61	11674,13806,14433,18641,18648,18746,54563,59015,69482,69912,71805,71844,72124,72787,103468,108989,227699,234865,269113,269966	Aldoa,Eno1,Gapdh,Pfkl,Pgam1,Pkm,Nup210,Nup160,Nup35,Nup43,Nup93,Nupl1,Seh1l,Ndc1,Nup107,Tpr,Nup188,Nup133,Nup54,Nup98
13_Member	Reactome Gene Sets	R-MMU-3301854	Nuclear Pore Complex (NPC) Disassembly	-14.0783	-11.605	14/31	54563,59015,69482,69912,71805,71844,72124,72787,103468,108989,227699,234865,269113,269966	Nup210,Nup160,Nup35,Nup43,Nup93,Nupl1,Seh1l,Ndc1,Nup107,Tpr,Nup188,Nup133,Nup54,Nup98
13_Member	Reactome Gene Sets	R-MMU-170822	Regulation of Glucokinase by Glucokinase Regulatory Protein	-14.329	-11.8447	14/30	54563,59015,69482,69912,71805,71844,72124,72787,103468,108989,227699,234865,269113,269966	Nup210,Nup160,Nup35,Nup43,Nup93,Nupl1,Seh1l,Ndc1,Nup107,Tpr,Nup188,Nup133,Nup54,Nup98
13_Member	Reactome Gene Sets	R-MMU-2995410	Nuclear Envelope (NE) Reassembly	-11.8089	-9.48171	16/60	16211,19384,59015,69482,69912,71805,71978,72124,72787,98386,100088,103468,226747,227699,234865,269966	Kpnb1,Ran,Nup160,Nup35,Nup43,Nup93,Ppp2r2a,Seh1l,Ndc1,Lbr,Rcc1,Nup107,Ahctf1,Nup188,Nup133,Nup98
13_Member	Reactome Gene Sets	R-MMU-4570464	SUMOylation of RNA binding proteins	-12.6994	-10.2961	15/45	15387,54563,59015,69482,69912,71805,71844,72124,72787,103468,108989,227699,234865,269113,269966	Hnrnpk,Nup210,Nup160,Nup35,Nup43,Nup93,Nupl1,Seh1l,Ndc1,Nup107,Tpr,Nup188,Nup133,Nup54,Nup98
13_Member	Reactome Gene Sets	R-MMU-3232142	SUMOylation of ubiquitinylation proteins	-12.7777	-10.3697	14/37	54563,59015,69482,69912,71805,71844,72124,72787,103468,108989,227699,234865,269113,269966	Nup210,Nup160,Nup35,Nup43,Nup93,Nupl1,Seh1l,Ndc1,Nup107,Tpr,Nup188,Nup133,Nup54,Nup98
13_Member	GO Biological Processes	GO:0006999	nuclear pore organization	-12.9717	-10.5398	10/14	69482,70699,71805,72124,72787,103468,226747,234865,269113,269966	Nup35,Nup205,Nup93,Seh1l,Ndc1,Nup107,Ahctf1,Nup133,Nup54,Nup98
13_Member	Reactome Gene Sets	R-MMU-4615885	SUMOylation of DNA replication proteins	-13.212	-10.7751	15/42	21973,54563,59015,69482,69912,71805,71844,72124,72787,103468,108989,227699,234865,269113,269966	Top2a,Nup210,Nup160,Nup35,Nup43,Nup93,Nupl1,Seh1l,Ndc1,Nup107,Tpr,Nup188,Nup133,Nup54,Nup98
13_Member	Reactome Gene Sets	R-MMU-159236	Transport of Mature mRNA derived from an Intron-Containing Transcript	-12.7919	-10.378	18/71	54563,59015,67996,69482,69912,71805,71844,72124,72787,103468,108014,108989,225027,227699,234865,269113,269966,433702	Nup210,Nup160,Srsf6,Nup35,Nup43,Nup93,Nupl1,Seh1l,Ndc1,Nup107,Srsf9,Tpr,Srsf7,Nup188,Nup133,Nup54,Nup98,Ncbp1
13_Member	GO Biological Processes	GO:0050658	RNA transport	-13.5529	-11.1008	26/155	15382,16418,18148,19384,20823,22608,54563,59015,69482,69912,71805,72124,72787,103468,108989,140486,224092,225027,226747,227699,230082,234865,269113,269966,276770,433702	Hnrnpa1,Eif6,Npm1,Ran,Ssb,Ybx1,Nup210,Nup160,Nup35,Nup43,Nup93,Seh1l,Ndc1,Nup107,Tpr,Igf2bp1,Lsg1,Srsf7,Ahctf1,Nup188,Nol6,Nup133,Nup54,Nup98,Eif5a,Ncbp1
13_Member	GO Biological Processes	GO:0050657	nucleic acid transport	-13.5529	-11.1008	26/155	15382,16418,18148,19384,20823,22608,54563,59015,69482,69912,71805,72124,72787,103468,108989,140486,224092,225027,226747,227699,230082,234865,269113,269966,276770,433702	Hnrnpa1,Eif6,Npm1,Ran,Ssb,Ybx1,Nup210,Nup160,Nup35,Nup43,Nup93,Seh1l,Ndc1,Nup107,Tpr,Igf2bp1,Lsg1,Srsf7,Ahctf1,Nup188,Nol6,Nup133,Nup54,Nup98,Eif5a,Ncbp1
13_Member	Reactome Gene Sets	R-MMU-4085377	SUMOylation of SUMOylation proteins	-13.6092	-11.1466	14/33	54563,59015,69482,69912,71805,71844,72124,72787,103468,108989,227699,234865,269113,269966	Nup210,Nup160,Nup35,Nup43,Nup93,Nupl1,Seh1l,Ndc1,Nup107,Tpr,Nup188,Nup133,Nup54,Nup98
13_Member	Reactome Gene Sets	R-MMU-2980766	Nuclear Envelope Breakdown	-14.0185	-11.5506	16/45	13726,54563,59015,69482,69912,71805,71844,72124,72787,103468,108989,227699,234865,269113,269966,380664	Emd,Nup210,Nup160,Nup35,Nup43,Nup93,Nupl1,Seh1l,Ndc1,Nup107,Tpr,Nup188,Nup133,Nup54,Nup98,Lemd3
13_Member	GO Biological Processes	GO:0051236	establishment of RNA localization	-13.3481	-10.9031	26/158	15382,16418,18148,19384,20823,22608,54563,59015,69482,69912,71805,72124,72787,103468,108989,140486,224092,225027,226747,227699,230082,234865,269113,269966,276770,433702	Hnrnpa1,Eif6,Npm1,Ran,Ssb,Ybx1,Nup210,Nup160,Nup35,Nup43,Nup93,Seh1l,Ndc1,Nup107,Tpr,Igf2bp1,Lsg1,Srsf7,Ahctf1,Nup188,Nol6,Nup133,Nup54,Nup98,Eif5a,Ncbp1
14_Summary	Reactome Gene Sets	R-MMU-6798695	Neutrophil degranulation	-7.78164	-5.69749	37/510	11674,12283,12461,12469,13001,13032,13244,14569,15516,16211,16480,16784,17319,17380,18641,18648,18746,18813,18950,19166,19336,20527,20619,22320,22596,26442,29875,59026,59287,66413,67213,67781,67963,69116,69550,70568,72269	Aldoa,Cab39,Cct2,Cct8,Csnk2b,Ctsc,Degs1,Gdi2,Hsp90ab1,Kpnb1,Jup,Lamp2,Mif,Mme,Pfkl,Pgam1,Pkm,Pa2g4,Pnp,Psma2,Rab24,Slc2a3,Snap23,Vamp8,Xrcc5,Psma5,Iqgap1,Huwe1,Ncstn,Psmd6,Cmtm6,Ilf2,Npc2,Ubr4,Bst2,Cpne3,Cda
14_Member	Reactome Gene Sets	R-MMU-6798695	Neutrophil degranulation	-7.78164	-5.69749	37/510	11674,12283,12461,12469,13001,13032,13244,14569,15516,16211,16480,16784,17319,17380,18641,18648,18746,18813,18950,19166,19336,20527,20619,22320,22596,26442,29875,59026,59287,66413,67213,67781,67963,69116,69550,70568,72269	Aldoa,Cab39,Cct2,Cct8,Csnk2b,Ctsc,Degs1,Gdi2,Hsp90ab1,Kpnb1,Jup,Lamp2,Mif,Mme,Pfkl,Pgam1,Pkm,Pa2g4,Pnp,Psma2,Rab24,Slc2a3,Snap23,Vamp8,Xrcc5,Psma5,Iqgap1,Huwe1,Ncstn,Psmd6,Cmtm6,Ilf2,Npc2,Ubr4,Bst2,Cpne3,Cda
15_Summary	GO Biological Processes	GO:0000956	nuclear-transcribed mRNA catabolic process	-7.71275	-5.64383	16/109	16341,18458,19205,19704,20823,27998,50783,67678,69902,72544,74133,103677,208718,227715,233789,433702,15452,18148,18950,21379,22271,22608,72269,83557,140486,209558,245474,17975,22596	Eif3e,Pabpc1,Ptbp1,Upf1,Ssb,Exosc5,Lsm4,Lsm3,Mrto4,Exosc6,Smg8,Smg6,Dis3l2,Exosc2,Smg1,Ncbp1,Hprt,Npm1,Pnp,Tbrg4,Upp1,Ybx1,Cda,Lin28a,Igf2bp1,Enpp3,Dkc1,Ncl,Xrcc5
15_Member	GO Biological Processes	GO:0000956	nuclear-transcribed mRNA catabolic process	-7.71275	-5.64383	16/109	16341,18458,19205,19704,20823,27998,50783,67678,69902,72544,74133,103677,208718,227715,233789,433702	Eif3e,Pabpc1,Ptbp1,Upf1,Ssb,Exosc5,Lsm4,Lsm3,Mrto4,Exosc6,Smg8,Smg6,Dis3l2,Exosc2,Smg1,Ncbp1
15_Member	GO Biological Processes	GO:1901361	organic cyclic compound catabolic process	-4.28914	-2.57831	27/453	15452,16341,18148,18458,18950,19205,19704,20823,21379,22271,22608,27998,50783,67678,69902,72269,72544,74133,83557,103677,140486,208718,209558,227715,233789,245474,433702	Hprt,Eif3e,Npm1,Pabpc1,Pnp,Ptbp1,Upf1,Ssb,Tbrg4,Upp1,Ybx1,Exosc5,Lsm4,Lsm3,Mrto4,Cda,Exosc6,Smg8,Lin28a,Smg6,Igf2bp1,Dis3l2,Enpp3,Exosc2,Smg1,Dkc1,Ncbp1
15_Member	GO Biological Processes	GO:0000184	nuclear-transcribed mRNA catabolic process, nonsense-mediated decay	-4.50398	-2.77981	7/36	16341,18458,19704,74133,103677,233789,433702	Eif3e,Pabpc1,Upf1,Smg8,Smg6,Smg1,Ncbp1
15_Member	GO Biological Processes	GO:0019439	aromatic compound catabolic process	-4.84317	-3.08481	27/421	15452,16341,18148,18458,18950,19205,19704,20823,21379,22271,22608,27998,50783,67678,69902,72269,72544,74133,83557,103677,140486,208718,209558,227715,233789,245474,433702	Hprt,Eif3e,Npm1,Pabpc1,Pnp,Ptbp1,Upf1,Ssb,Tbrg4,Upp1,Ybx1,Exosc5,Lsm4,Lsm3,Mrto4,Cda,Exosc6,Smg8,Lin28a,Smg6,Igf2bp1,Dis3l2,Enpp3,Exosc2,Smg1,Dkc1,Ncbp1
15_Member	GO Biological Processes	GO:0046700	heterocycle catabolic process	-5.10758	-3.32776	27/407	15452,16341,18148,18458,18950,19205,19704,20823,21379,22271,22608,27998,50783,67678,69902,72269,72544,74133,83557,103677,140486,208718,209558,227715,233789,245474,433702	Hprt,Eif3e,Npm1,Pabpc1,Pnp,Ptbp1,Upf1,Ssb,Tbrg4,Upp1,Ybx1,Exosc5,Lsm4,Lsm3,Mrto4,Cda,Exosc6,Smg8,Lin28a,Smg6,Igf2bp1,Dis3l2,Enpp3,Exosc2,Smg1,Dkc1,Ncbp1
15_Member	GO Molecular Functions	GO:0042162	telomeric DNA binding	-2.77954	-1.25956	5/34	17975,19704,22596,103677,233789	Ncl,Upf1,Xrcc5,Smg6,Smg1
15_Member	GO Biological Processes	GO:0034655	nucleobase-containing compound catabolic process	-5.79139	-3.94389	27/374	15452,16341,18148,18458,18950,19205,19704,20823,21379,22271,22608,27998,50783,67678,69902,72269,72544,74133,83557,103677,140486,208718,209558,227715,233789,245474,433702	Hprt,Eif3e,Npm1,Pabpc1,Pnp,Ptbp1,Upf1,Ssb,Tbrg4,Upp1,Ybx1,Exosc5,Lsm4,Lsm3,Mrto4,Cda,Exosc6,Smg8,Lin28a,Smg6,Igf2bp1,Dis3l2,Enpp3,Exosc2,Smg1,Dkc1,Ncbp1
15_Member	GO Biological Processes	GO:0006402	mRNA catabolic process	-5.90932	-4.05142	20/221	16341,18148,18458,19205,19704,20823,21379,22608,27998,50783,67678,69902,72544,74133,103677,140486,208718,227715,233789,433702	Eif3e,Npm1,Pabpc1,Ptbp1,Upf1,Ssb,Tbrg4,Ybx1,Exosc5,Lsm4,Lsm3,Mrto4,Exosc6,Smg8,Smg6,Igf2bp1,Dis3l2,Exosc2,Smg1,Ncbp1
15_Member	GO Biological Processes	GO:0006401	RNA catabolic process	-5.97154	-4.10834	22/259	16341,18148,18458,19205,19704,20823,21379,22608,27998,50783,67678,69902,72544,74133,83557,103677,140486,208718,227715,233789,245474,433702	Eif3e,Npm1,Pabpc1,Ptbp1,Upf1,Ssb,Tbrg4,Ybx1,Exosc5,Lsm4,Lsm3,Mrto4,Exosc6,Smg8,Lin28a,Smg6,Igf2bp1,Dis3l2,Exosc2,Smg1,Dkc1,Ncbp1
15_Member	GO Biological Processes	GO:0044270	cellular nitrogen compound catabolic process	-5.12702	-3.3461	27/406	15452,16341,18148,18458,18950,19205,19704,20823,21379,22271,22608,27998,50783,67678,69902,72269,72544,74133,83557,103677,140486,208718,209558,227715,233789,245474,433702	Hprt,Eif3e,Npm1,Pabpc1,Pnp,Ptbp1,Upf1,Ssb,Tbrg4,Upp1,Ybx1,Exosc5,Lsm4,Lsm3,Mrto4,Cda,Exosc6,Smg8,Lin28a,Smg6,Igf2bp1,Dis3l2,Enpp3,Exosc2,Smg1,Dkc1,Ncbp1
16_Summary	Reactome Gene Sets	R-MMU-111367	SLBP independent Processing of Histone Pre-mRNAs	-12.3809	-10.0088	6/10	20638,20643,67332,68011,69878,433702,20641,107686,27374,50783,68988,216766,237221,276919,51786,54451,67337,94230,20639,67996,108014,225027	Snrpb,Snrpe,Snrpd3,Snrpg,Snrpf,Ncbp1,Snrpd1,Snrpd2,Prmt5,Lsm4,Prpf31,Gemin5,Gemin8,Gemin4,Cpsf2,Cpsf3,Cstf1,Cpsf1,Snrpb2,Srsf6,Srsf9,Srsf7
16_Member	Reactome Gene Sets	R-MMU-111367	SLBP independent Processing of Histone Pre-mRNAs	-7.2655	-5.24511	6/10	20638,20643,67332,68011,69878,433702	Snrpb,Snrpe,Snrpd3,Snrpg,Snrpf,Ncbp1
16_Member	Reactome Gene Sets	R-MMU-77588	SLBP Dependent Processing of Replication-Dependent Histone Pre-mRNAs	-6.93264	-4.96276	6/11	20638,20643,67332,68011,69878,433702	Snrpb,Snrpe,Snrpd3,Snrpg,Snrpf,Ncbp1
16_Member	GO Molecular Functions	GO:1990446	U1 snRNP binding	-8.12143	-6.01218	6/8	20638,20641,20643,67332,68011,107686	Snrpb,Snrpd1,Snrpe,Snrpd3,Snrpg,Snrpd2
16_Member	GO Biological Processes	GO:0000387	spliceosomal snRNP assembly	-12.3809	-10.0088	13/32	20638,20641,20643,27374,50783,67332,68011,68988,69878,107686,216766,237221,276919	Snrpb,Snrpd1,Snrpe,Prmt5,Lsm4,Snrpd3,Snrpg,Prpf31,Snrpf,Snrpd2,Gemin5,Gemin8,Gemin4
16_Member	Reactome Gene Sets	R-MMU-75067	Processing of Capped Intronless Pre-mRNA	-8.99512	-6.83619	10/28	20638,20643,51786,54451,67332,67337,68011,69878,94230,433702	Snrpb,Snrpe,Cpsf2,Cpsf3,Snrpd3,Cstf1,Snrpg,Snrpf,Cpsf1,Ncbp1
16_Member	GO Molecular Functions	GO:0070990	snRNP binding	-10.5512	-8.31468	8/11	20638,20639,20641,20643,67332,68011,68988,107686	Snrpb,Snrpb2,Snrpd1,Snrpe,Snrpd3,Snrpg,Prpf31,Snrpd2
16_Member	Reactome Gene Sets	R-MMU-73856	RNA Polymerase II Transcription Termination	-8.13017	-6.01858	13/64	20638,20643,51786,54451,67332,67337,67996,68011,69878,94230,108014,225027,433702	Snrpb,Snrpe,Cpsf2,Cpsf3,Snrpd3,Cstf1,Srsf6,Snrpg,Snrpf,Cpsf1,Srsf9,Srsf7,Ncbp1
17_Summary	WikiPathways	WP246	TNF-alpha NF-kB Signaling Pathway	-6.44541	-4.52385	19/186	11647,12995,13001,14694,15516,18747,19946,19988,20586,20587,26961,26965,27207,56456,66413,67891,211651,245841,433759	Alpl,Csnk2a1,Csnk2b,Rack1,Hsp90ab1,Prkaca,Rpl30,Rpl6,Smarca4,Smarcb1,Rpl8,Cul1,Rps11,Actl6a,Psmd6,Rpl4,Fancd2,Polr2h,Hdac1
17_Member	WikiPathways	WP246	TNF-alpha NF-kB Signaling Pathway	-6.44541	-4.52385	19/186	11647,12995,13001,14694,15516,18747,19946,19988,20586,20587,26961,26965,27207,56456,66413,67891,211651,245841,433759	Alpl,Csnk2a1,Csnk2b,Rack1,Hsp90ab1,Prkaca,Rpl30,Rpl6,Smarca4,Smarcb1,Rpl8,Cul1,Rps11,Actl6a,Psmd6,Rpl4,Fancd2,Polr2h,Hdac1
18_Summary	CORUM	CORUM:161	SWAP complex	-6.36308	-4.45796	4/4	11545,17975,18148,20947,12018,13665,17380,18971,68142,72584,12190,26407	Parp1,Ncl,Npm1,Swap70,Bak1,Eif2s1,Mme,Pold1,Ino80,Cul4b,Brca2,Map3k4
18_Member	CORUM	CORUM:161	SWAP complex	-6.36308	-4.45796	4/4	11545,17975,18148,20947	Parp1,Ncl,Npm1,Swap70
18_Member	GO Biological Processes	GO:0034644	cellular response to UV	-2.74582	-1.23629	8/87	11545,12018,13665,17380,18148,18971,68142,72584	Parp1,Bak1,Eif2s1,Mme,Npm1,Pold1,Ino80,Cul4b
18_Member	GO Biological Processes	GO:0009411	response to UV	-2.33941	-0.890881	10/146	11545,12018,12190,13665,17380,18148,18971,26407,68142,72584	Parp1,Bak1,Brca2,Eif2s1,Mme,Npm1,Pold1,Map3k4,Ino80,Cul4b
18_Member	GO Biological Processes	GO:0071482	cellular response to light stimulus	-2.24062	-0.804721	8/105	11545,12018,13665,17380,18148,18971,68142,72584	Parp1,Bak1,Eif2s1,Mme,Npm1,Pold1,Ino80,Cul4b
19_Summary	GO Molecular Functions	GO:0000049	tRNA binding	-6.12396	-4.24723	11/65	13722,19988,20823,26905,66044,66244,74195,85305,98956,229317,381314	Aimp1,Rpl6,Ssb,Eif2s3x,Dtd1,Nemf,Elp3,Kars,Nat10,Eif2a,Iars2
19_Member	GO Molecular Functions	GO:0000049	tRNA binding	-6.12396	-4.24723	11/65	13722,19988,20823,26905,66044,66244,74195,85305,98956,229317,381314	Aimp1,Rpl6,Ssb,Eif2s3x,Dtd1,Nemf,Elp3,Kars,Nat10,Eif2a,Iars2
20_Summary	GO Biological Processes	GO:0006164	purine nucleotide biosynthetic process	-8.99969	-6.83813	17/160	11545,11566,11674,14450,15452,18746,18950,56520,66592,67054,79059,108147,108156,229363,231327,237823,328099,13806,14433,14635,16418,17319,18641,18648,19384,76055,22271,69719,72269,18971,20020,209558,245841,12387,18145,20652,21881,59287,64294,227620,241062,16881,16882,23874,85305,107508,270685,353172,381314,59027,68971,227102,14194,14718,18242,69051,104174,66174	Parp1,Adss,Aldoa,Gart,Hprt,Pkm,Pnp,Nme4,Stoml2,Paics,Nme3,Atic,Mthfd1,Gmps,Ppat,Pfas,Prps1l3,Eno1,Gapdh,Galk1,Eif6,Mif,Pfkl,Pgam1,Ran,Oga,Upp1,Cad,Cda,Pold1,Polr2a,Enpp3,Polr2h,Ctnnb1,Npc1,Soat1,Tkt,Ncstn,Itm2c,Uap1l1,Pgap1,Lig1,Lig3,Farsb,Kars,Eprs,Mthfd1l,Gars,Iars2,Nampt,Tamm41,Ormdl1,Fh1,Got1,Oat,Pycr2,Gldc,Nudt14
20_Member	GO Biological Processes	GO:0006164	purine nucleotide biosynthetic process	-6.07124	-4.19862	17/160	11545,11566,11674,14450,15452,18746,18950,56520,66592,67054,79059,108147,108156,229363,231327,237823,328099	Parp1,Adss,Aldoa,Gart,Hprt,Pkm,Pnp,Nme4,Stoml2,Paics,Nme3,Atic,Mthfd1,Gmps,Ppat,Pfas,Prps1l3
20_Member	GO Biological Processes	GO:0072521	purine-containing compound metabolic process	-5.15701	-3.37277	26/381	11545,11566,11674,13806,14433,14450,14635,15452,16418,17319,18641,18648,18746,18950,19384,56520,66592,67054,76055,79059,108147,108156,229363,231327,237823,328099	Parp1,Adss,Aldoa,Eno1,Gapdh,Gart,Galk1,Hprt,Eif6,Mif,Pfkl,Pgam1,Pkm,Pnp,Ran,Nme4,Stoml2,Paics,Oga,Nme3,Atic,Mthfd1,Gmps,Ppat,Pfas,Prps1l3
20_Member	GO Biological Processes	GO:0009259	ribonucleotide metabolic process	-5.23872	-3.44777	25/354	11545,11566,11674,13806,14433,14450,14635,15452,16418,17319,18641,18648,18746,18950,19384,22271,56520,66592,67054,69719,72269,79059,108147,229363,237823	Parp1,Adss,Aldoa,Eno1,Gapdh,Gart,Galk1,Hprt,Eif6,Mif,Pfkl,Pgam1,Pkm,Pnp,Ran,Upp1,Nme4,Stoml2,Paics,Cad,Cda,Nme3,Atic,Gmps,Pfas
20_Member	KEGG Pathway	mmu00230	Purine metabolism	-5.36323	-3.56085	17/180	11566,14450,15452,18746,18950,18971,20020,56520,67054,79059,108147,209558,229363,231327,237823,245841,328099	Adss,Gart,Hprt,Pkm,Pnp,Pold1,Polr2a,Nme4,Paics,Nme3,Atic,Enpp3,Gmps,Ppat,Pfas,Polr2h,Prps1l3
20_Member	WikiPathways	WP2185	Purine metabolism	-5.66794	-3.84053	17/171	11566,14450,15452,18746,18950,18971,20020,56520,67054,79059,108147,209558,229363,231327,237823,245841,328099	Adss,Gart,Hprt,Pkm,Pnp,Pold1,Polr2a,Nme4,Paics,Nme3,Atic,Enpp3,Gmps,Ppat,Pfas,Polr2h,Prps1l3
20_Member	GO Biological Processes	GO:0006163	purine nucleotide metabolic process	-5.60211	-3.78092	26/360	11545,11566,11674,13806,14433,14450,14635,15452,16418,17319,18641,18648,18746,18950,19384,56520,66592,67054,76055,79059,108147,108156,229363,231327,237823,328099	Parp1,Adss,Aldoa,Eno1,Gapdh,Gart,Galk1,Hprt,Eif6,Mif,Pfkl,Pgam1,Pkm,Pnp,Ran,Nme4,Stoml2,Paics,Oga,Nme3,Atic,Mthfd1,Gmps,Ppat,Pfas,Prps1l3
20_Member	GO Biological Processes	GO:0009260	ribonucleotide biosynthetic process	-5.10336	-3.32573	15/150	11545,11566,11674,14450,15452,18746,18950,56520,66592,67054,69719,79059,108147,229363,237823	Parp1,Adss,Aldoa,Gart,Hprt,Pkm,Pnp,Nme4,Stoml2,Paics,Cad,Nme3,Atic,Gmps,Pfas
20_Member	GO Biological Processes	GO:0072522	purine-containing compound biosynthetic process	-5.88344	-4.02817	17/165	11545,11566,11674,14450,15452,18746,18950,56520,66592,67054,79059,108147,108156,229363,231327,237823,328099	Parp1,Adss,Aldoa,Gart,Hprt,Pkm,Pnp,Nme4,Stoml2,Paics,Nme3,Atic,Mthfd1,Gmps,Ppat,Pfas,Prps1l3
20_Member	KEGG Pathway	ko00230	Purine metabolism	-5.49603	-3.67952	17/176	11566,14450,15452,18746,18950,18971,20020,56520,67054,79059,108147,209558,229363,231327,237823,245841,328099	Adss,Gart,Hprt,Pkm,Pnp,Pold1,Polr2a,Nme4,Paics,Nme3,Atic,Enpp3,Gmps,Ppat,Pfas,Polr2h,Prps1l3
20_Member	GO Biological Processes	GO:1901137	carbohydrate derivative biosynthetic process	-2.60163	-1.11171	25/525	11545,11566,11674,12387,14450,15452,18145,18746,18950,20652,21881,56520,59287,64294,66592,67054,69719,76055,79059,108147,227620,229363,237823,241062,328099	Parp1,Adss,Aldoa,Ctnnb1,Gart,Hprt,Npc1,Pkm,Pnp,Soat1,Tkt,Nme4,Ncstn,Itm2c,Stoml2,Paics,Cad,Oga,Nme3,Atic,Uap1l1,Gmps,Pfas,Pgap1,Prps1l3
20_Member	GO Biological Processes	GO:0009150	purine ribonucleotide metabolic process	-4.20596	-2.50441	22/335	11545,11566,11674,13806,14433,14450,14635,15452,16418,17319,18641,18648,18746,18950,19384,56520,66592,67054,79059,108147,229363,237823	Parp1,Adss,Aldoa,Eno1,Gapdh,Gart,Galk1,Hprt,Eif6,Mif,Pfkl,Pgam1,Pkm,Pnp,Ran,Nme4,Stoml2,Paics,Nme3,Atic,Gmps,Pfas
20_Member	GO Molecular Functions	GO:0016874	ligase activity	-4.70046	-2.9565	15/162	11566,14450,16881,16882,23874,67054,69719,85305,107508,108156,229363,237823,270685,353172,381314	Adss,Gart,Lig1,Lig3,Farsb,Paics,Cad,Kars,Eprs,Mthfd1,Gmps,Pfas,Mthfd1l,Gars,Iars2
20_Member	GO Molecular Functions	GO:0016879	ligase activity, forming carbon-nitrogen bonds	-4.42263	-2.70327	8/50	11566,14450,67054,69719,108156,229363,237823,270685	Adss,Gart,Paics,Cad,Mthfd1,Gmps,Pfas,Mthfd1l
20_Member	GO Biological Processes	GO:0090407	organophosphate biosynthetic process	-3.78367	-2.13154	25/434	11545,11566,11674,14450,15452,18746,18950,21881,56520,59027,66592,67054,68971,69719,79059,85305,108147,108156,227102,229363,231327,237823,241062,328099,353172	Parp1,Adss,Aldoa,Gart,Hprt,Pkm,Pnp,Tkt,Nme4,Nampt,Stoml2,Paics,Tamm41,Cad,Nme3,Kars,Atic,Mthfd1,Ormdl1,Gmps,Ppat,Pfas,Pgap1,Prps1l3,Gars
20_Member	GO Biological Processes	GO:0006520	cellular amino acid metabolic process	-3.66074	-2.0239	17/245	11566,14194,14450,14718,18242,23874,69051,69719,85305,104174,107508,108156,229363,231327,237823,353172,381314	Adss,Fh1,Gart,Got1,Oat,Farsb,Pycr2,Cad,Kars,Gldc,Eprs,Mthfd1,Gmps,Ppat,Pfas,Gars,Iars2
20_Member	GO Biological Processes	GO:0009064	glutamine family amino acid metabolic process	-3.5959	-1.96866	8/65	14194,14718,18242,69051,69719,229363,231327,237823	Fh1,Got1,Oat,Pycr2,Cad,Gmps,Ppat,Pfas
20_Member	GO Molecular Functions	GO:0016884	carbon-nitrogen ligase activity, with glutamine as amido-N-donor	-2.89716	-1.36158	3/9	69719,229363,237823	Cad,Gmps,Pfas
20_Member	GO Biological Processes	GO:1901605	alpha-amino acid metabolic process	-2.74784	-1.23771	12/173	11566,14194,14450,14718,18242,69051,69719,104174,108156,229363,231327,237823	Adss,Fh1,Gart,Got1,Oat,Pycr2,Cad,Gldc,Mthfd1,Gmps,Ppat,Pfas
20_Member	GO Biological Processes	GO:0006541	glutamine metabolic process	-2.73739	-1.22962	4/21	69719,229363,231327,237823	Cad,Gmps,Ppat,Pfas
20_Member	GO Biological Processes	GO:0009152	purine ribonucleotide biosynthetic process	-4.76769	-3.01864	14/141	11545,11566,11674,14450,15452,18746,18950,56520,66592,67054,79059,108147,229363,237823	Parp1,Adss,Aldoa,Gart,Hprt,Pkm,Pnp,Nme4,Stoml2,Paics,Nme3,Atic,Gmps,Pfas
20_Member	GO Biological Processes	GO:0046390	ribose phosphate biosynthetic process	-6.18773	-4.30268	17/157	11545,11566,11674,14450,15452,18746,18950,21881,56520,66592,67054,69719,79059,108147,229363,237823,328099	Parp1,Adss,Aldoa,Gart,Hprt,Pkm,Pnp,Tkt,Nme4,Stoml2,Paics,Cad,Nme3,Atic,Gmps,Pfas,Prps1l3
20_Member	GO Biological Processes	GO:0019693	ribose phosphate metabolic process	-7.04891	-5.06343	29/365	11545,11566,11674,13806,14433,14450,14635,15452,16418,17319,18641,18648,18746,18950,19384,21881,22271,56520,66174,66592,67054,69719,72269,79059,108147,229363,231327,237823,328099	Parp1,Adss,Aldoa,Eno1,Gapdh,Gart,Galk1,Hprt,Eif6,Mif,Pfkl,Pgam1,Pkm,Pnp,Ran,Tkt,Upp1,Nme4,Nudt14,Stoml2,Paics,Cad,Cda,Nme3,Atic,Gmps,Ppat,Pfas,Prps1l3
20_Member	GO Biological Processes	GO:0009124	nucleoside monophosphate biosynthetic process	-6.31367	-4.41438	8/29	11566,14450,15452,67054,108147,229363,231327,237823	Adss,Gart,Hprt,Paics,Atic,Gmps,Ppat,Pfas
20_Member	Reactome Gene Sets	R-MMU-8956320	Nucleobase biosynthesis	-8.99969	-6.83813	8/15	11566,14450,67054,69719,108147,229363,231327,237823	Adss,Gart,Paics,Cad,Atic,Gmps,Ppat,Pfas
20_Member	GO Biological Processes	GO:0006188	IMP biosynthetic process	-6.23563	-4.34636	5/8	14450,15452,67054,108147,237823	Gart,Hprt,Paics,Atic,Pfas
20_Member	GO Biological Processes	GO:0009127	purine nucleoside monophosphate biosynthetic process	-7.75736	-5.68197	8/20	11566,14450,15452,67054,108147,229363,231327,237823	Adss,Gart,Hprt,Paics,Atic,Gmps,Ppat,Pfas
20_Member	GO Biological Processes	GO:0009168	purine ribonucleoside monophosphate biosynthetic process	-7.75736	-5.68197	8/20	11566,14450,15452,67054,108147,229363,231327,237823	Adss,Gart,Hprt,Paics,Atic,Gmps,Ppat,Pfas
20_Member	GO Biological Processes	GO:0006753	nucleoside phosphate metabolic process	-7.64701	-5.59282	34/449	11545,11566,11674,13806,14433,14450,14635,15452,16418,17319,18641,18648,18746,18950,19384,22271,56520,59027,66174,66592,67054,69719,72269,76055,79059,85305,108147,108156,209558,229363,231327,237823,328099,353172	Parp1,Adss,Aldoa,Eno1,Gapdh,Gart,Galk1,Hprt,Eif6,Mif,Pfkl,Pgam1,Pkm,Pnp,Ran,Upp1,Nme4,Nampt,Nudt14,Stoml2,Paics,Cad,Cda,Oga,Nme3,Kars,Atic,Mthfd1,Enpp3,Gmps,Ppat,Pfas,Prps1l3,Gars
20_Member	GO Biological Processes	GO:0009161	ribonucleoside monophosphate metabolic process	-7.44993	-5.41987	11/49	11566,14450,15452,18950,22271,67054,72269,108147,229363,231327,237823	Adss,Gart,Hprt,Pnp,Upp1,Paics,Cda,Atic,Gmps,Ppat,Pfas
20_Member	GO Biological Processes	GO:0009117	nucleotide metabolic process	-7.3392	-5.31497	33/440	11545,11566,11674,13806,14433,14450,14635,15452,16418,17319,18641,18648,18746,18950,19384,22271,56520,59027,66592,67054,69719,72269,76055,79059,85305,108147,108156,209558,229363,231327,237823,328099,353172	Parp1,Adss,Aldoa,Eno1,Gapdh,Gart,Galk1,Hprt,Eif6,Mif,Pfkl,Pgam1,Pkm,Pnp,Ran,Upp1,Nme4,Nampt,Stoml2,Paics,Cad,Cda,Oga,Nme3,Kars,Atic,Mthfd1,Enpp3,Gmps,Ppat,Pfas,Prps1l3,Gars
20_Member	KEGG Pathway	M00048	Inosine monophosphate biosynthesis, PRPP + glutamine => IMP	-7.18703	-5.18353	5/6	14450,67054,108147,231327,237823	Gart,Paics,Atic,Ppat,Pfas
20_Member	KEGG Pathway	mmu_M00048	Inosine monophosphate biosynthesis, PRPP + glutamine => IMP	-7.18703	-5.18353	5/6	14450,67054,108147,231327,237823	Gart,Paics,Atic,Ppat,Pfas
20_Member	Reactome Gene Sets	R-MMU-73817	Purine ribonucleoside monophosphate biosynthesis	-8.29386	-6.17752	7/12	11566,14450,67054,108147,229363,231327,237823	Adss,Gart,Paics,Atic,Gmps,Ppat,Pfas
20_Member	GO Biological Processes	GO:0009156	ribonucleoside monophosphate biosynthetic process	-7.03052	-5.0468	8/24	11566,14450,15452,67054,108147,229363,231327,237823	Adss,Gart,Hprt,Paics,Atic,Gmps,Ppat,Pfas
20_Member	GO Biological Processes	GO:1901293	nucleoside phosphate biosynthetic process	-6.97187	-4.99685	21/208	11545,11566,11674,14450,15452,18746,18950,56520,59027,66592,67054,69719,79059,85305,108147,108156,229363,231327,237823,328099,353172	Parp1,Adss,Aldoa,Gart,Hprt,Pkm,Pnp,Nme4,Nampt,Stoml2,Paics,Cad,Nme3,Kars,Atic,Mthfd1,Gmps,Ppat,Pfas,Prps1l3,Gars
20_Member	GO Biological Processes	GO:0046040	IMP metabolic process	-6.9524	-4.97911	7/17	11566,14450,15452,18950,67054,108147,237823	Adss,Gart,Hprt,Pnp,Paics,Atic,Pfas
20_Member	GO Biological Processes	GO:0055086	nucleobase-containing small molecule metabolic process	-6.88371	-4.91723	35/506	11545,11566,11674,13806,14433,14450,14635,15452,16418,17319,18641,18648,18746,18950,19384,22271,56520,59027,66174,66592,67054,69719,72269,76055,79059,85305,108147,108156,209558,227620,229363,231327,237823,328099,353172	Parp1,Adss,Aldoa,Eno1,Gapdh,Gart,Galk1,Hprt,Eif6,Mif,Pfkl,Pgam1,Pkm,Pnp,Ran,Upp1,Nme4,Nampt,Nudt14,Stoml2,Paics,Cad,Cda,Oga,Nme3,Kars,Atic,Mthfd1,Enpp3,Uap1l1,Gmps,Ppat,Pfas,Prps1l3,Gars
20_Member	Reactome Gene Sets	R-MMU-15869	Metabolism of nucleotides	-6.84716	-4.88739	14/95	11566,14450,15452,18950,22271,56520,67054,69719,72269,79059,108147,229363,231327,237823	Adss,Gart,Hprt,Pnp,Upp1,Nme4,Paics,Cad,Cda,Nme3,Atic,Gmps,Ppat,Pfas
20_Member	GO Biological Processes	GO:0009123	nucleoside monophosphate metabolic process	-6.64788	-4.70763	11/58	11566,14450,15452,18950,22271,67054,72269,108147,229363,231327,237823	Adss,Gart,Hprt,Pnp,Upp1,Paics,Cda,Atic,Gmps,Ppat,Pfas
20_Member	GO Biological Processes	GO:0009167	purine ribonucleoside monophosphate metabolic process	-6.51954	-4.59184	9/37	11566,14450,15452,18950,67054,108147,229363,231327,237823	Adss,Gart,Hprt,Pnp,Paics,Atic,Gmps,Ppat,Pfas
20_Member	GO Biological Processes	GO:0009126	purine nucleoside monophosphate metabolic process	-6.41211	-4.49959	9/38	11566,14450,15452,18950,67054,108147,229363,231327,237823	Adss,Gart,Hprt,Pnp,Paics,Atic,Gmps,Ppat,Pfas
20_Member	GO Biological Processes	GO:0006189	'de novo' IMP biosynthetic process	-6.36308	-4.45796	4/4	14450,67054,108147,237823	Gart,Paics,Atic,Pfas
20_Member	GO Biological Processes	GO:0009165	nucleotide biosynthetic process	-7.15361	-5.16102	21/203	11545,11566,11674,14450,15452,18746,18950,56520,59027,66592,67054,69719,79059,85305,108147,108156,229363,231327,237823,328099,353172	Parp1,Adss,Aldoa,Gart,Hprt,Pkm,Pnp,Nme4,Nampt,Stoml2,Paics,Cad,Nme3,Kars,Atic,Mthfd1,Gmps,Ppat,Pfas,Prps1l3,Gars

## Sheet: Cluster 04
GroupID	Category	Term	Description	LogP	Log(q-value)	InTerm_InList	Genes	Symbols
1_Summary	KEGG Pathway	ko04141	Protein processing in endoplasmic reticulum	-26.0013	-21.6249	38/167	12282,12330,13135,13200,14376,14827,14828,16430,18415,18453,18786,19089,20335,20338,20832,22027,22393,50907,53421,56424,57377,66212,66397,66861,66890,67397,67819,68292,71853,72265,81910,103963,105245,140740,217365,269523,386649,100037258,19170,59025,76577,213990,224727,224826,13000,14083,22201,69077,74996,81018,17025,20316,66881,230594,11465,11785,12928,14084,14751,22143,22154,22330,64143,66734,6…	Hyou1,Canx,Dad1,Ddost,Ganab,Pdia3,Hspa5,Stt3a,Hspa4l,P4hb,Plaa,Prkcsh,Sec61g,Sel1l,Ssr4,Hsp90b1,Wfs1,Preb,Sec61a1,Stub1,Mogs,Sec61b,Sar1b,Dnajc10,Lman2,Erp29,Derl1,Stt3b,Pdia6,Tram1,Rrbp1,Rpn1,Txndc5,Sec63,Nploc4,Vcp,Nsfl1c,Dnajc3,Psmb1,Usp14,Faf2,Agap3,Bag6,Ubr2,Csnk2a2,Ptk2,Uba1,Psmd11,Usp47,Rnf114,Alad,Sdf2,Pcyox1,Tut4,Actg1,Apbb1,Crk,Faf1,Gpi1,Tuba1b,Tubb5,Vcl,Ralb,Map1lc3a,Rtn4,Stat1,Ctsb,Lo…
1_Member	KEGG Pathway	ko04141	Protein processing in endoplasmic reticulum	-26.0013	-21.6249	38/167	12282,12330,13135,13200,14376,14827,14828,16430,18415,18453,18786,19089,20335,20338,20832,22027,22393,50907,53421,56424,57377,66212,66397,66861,66890,67397,67819,68292,71853,72265,81910,103963,105245,140740,217365,269523,386649,100037258	Hyou1,Canx,Dad1,Ddost,Ganab,Pdia3,Hspa5,Stt3a,Hspa4l,P4hb,Plaa,Prkcsh,Sec61g,Sel1l,Ssr4,Hsp90b1,Wfs1,Preb,Sec61a1,Stub1,Mogs,Sec61b,Sar1b,Dnajc10,Lman2,Erp29,Derl1,Stt3b,Pdia6,Tram1,Rrbp1,Rpn1,Txndc5,Sec63,Nploc4,Vcp,Nsfl1c,Dnajc3
1_Member	GO Biological Processes	GO:0043161	proteasome-mediated ubiquitin-dependent protein catabolic process	-2.06993	-0.657306	18/410	14828,18786,19170,20338,22027,22393,56424,59025,66212,66861,67819,68292,76577,213990,224727,224826,269523,386649	Hspa5,Plaa,Psmb1,Sel1l,Hsp90b1,Wfs1,Stub1,Usp14,Sec61b,Dnajc10,Derl1,Stt3b,Faf2,Agap3,Bag6,Ubr2,Vcp,Nsfl1c
1_Member	GO Biological Processes	GO:0006511	ubiquitin-dependent protein catabolic process	-2.27492	-0.804298	25/611	13000,14083,14828,18786,19170,20338,22027,22201,22393,56424,59025,66212,66861,67819,68292,69077,74996,76577,81018,213990,217365,224727,224826,269523,386649	Csnk2a2,Ptk2,Hspa5,Plaa,Psmb1,Sel1l,Hsp90b1,Uba1,Wfs1,Stub1,Usp14,Sec61b,Dnajc10,Derl1,Stt3b,Psmd11,Usp47,Faf2,Rnf114,Agap3,Nploc4,Bag6,Ubr2,Vcp,Nsfl1c
1_Member	GO Biological Processes	GO:0010498	proteasomal protein catabolic process	-2.3612	-0.86617	21/475	14828,17025,18786,19170,20316,20338,22027,22393,56424,59025,66212,66861,67819,68292,76577,213990,217365,224727,224826,269523,386649	Hspa5,Alad,Plaa,Psmb1,Sdf2,Sel1l,Hsp90b1,Wfs1,Stub1,Usp14,Sec61b,Dnajc10,Derl1,Stt3b,Faf2,Agap3,Nploc4,Bag6,Ubr2,Vcp,Nsfl1c
1_Member	GO Biological Processes	GO:0019941	modification-dependent protein catabolic process	-2.46545	-0.943347	26/622	13000,14083,14828,18786,19170,20338,22027,22201,22393,56424,59025,66212,66861,66881,67819,68292,69077,74996,76577,81018,213990,217365,224727,224826,269523,386649	Csnk2a2,Ptk2,Hspa5,Plaa,Psmb1,Sel1l,Hsp90b1,Uba1,Wfs1,Stub1,Usp14,Sec61b,Dnajc10,Pcyox1,Derl1,Stt3b,Psmd11,Usp47,Faf2,Rnf114,Agap3,Nploc4,Bag6,Ubr2,Vcp,Nsfl1c
1_Member	GO Biological Processes	GO:0043632	modification-dependent macromolecule catabolic process	-2.67019	-1.07553	27/632	13000,14083,14828,18786,19170,20338,22027,22201,22393,56424,59025,66212,66861,66881,67819,68292,69077,74996,76577,81018,213990,217365,224727,224826,230594,269523,386649	Csnk2a2,Ptk2,Hspa5,Plaa,Psmb1,Sel1l,Hsp90b1,Uba1,Wfs1,Stub1,Usp14,Sec61b,Dnajc10,Pcyox1,Derl1,Stt3b,Psmd11,Usp47,Faf2,Rnf114,Agap3,Nploc4,Bag6,Ubr2,Tut4,Vcp,Nsfl1c
1_Member	GO Molecular Functions	GO:0031625	ubiquitin protein ligase binding	-4.39779	-2.3638	20/306	11465,11785,12928,14083,14084,14751,14828,22143,22154,22330,22393,56424,64143,66734,67819,68585,76577,217365,224727,269523	Actg1,Apbb1,Crk,Ptk2,Faf1,Gpi1,Hspa5,Tuba1b,Tubb5,Vcl,Wfs1,Stub1,Ralb,Map1lc3a,Derl1,Rtn4,Faf2,Nploc4,Bag6,Vcp
1_Member	GO Molecular Functions	GO:0044389	ubiquitin-like protein ligase binding	-4.53477	-2.47432	21/324	11465,11785,12928,14083,14084,14751,14828,20846,22143,22154,22330,22393,56424,64143,66734,67819,68585,76577,217365,224727,269523	Actg1,Apbb1,Crk,Ptk2,Faf1,Gpi1,Hspa5,Stat1,Tuba1b,Tubb5,Vcl,Wfs1,Stub1,Ralb,Map1lc3a,Derl1,Rtn4,Faf2,Nploc4,Bag6,Vcp
1_Member	GO Biological Processes	GO:0051603	proteolysis involved in cellular protein catabolic process	-2.98225	-1.30081	31/726	13000,13030,14083,14828,17025,18786,19170,20316,20338,22027,22201,22393,56424,59025,66212,66861,66881,66887,67819,68292,69077,74996,76577,81018,213990,217365,224727,224826,269523,386649,100037258	Csnk2a2,Ctsb,Ptk2,Hspa5,Alad,Plaa,Psmb1,Sdf2,Sel1l,Hsp90b1,Uba1,Wfs1,Stub1,Usp14,Sec61b,Dnajc10,Pcyox1,Lonp2,Derl1,Stt3b,Psmd11,Usp47,Faf2,Rnf114,Agap3,Nploc4,Bag6,Ubr2,Vcp,Nsfl1c,Dnajc3
1_Member	GO Biological Processes	GO:1903513	endoplasmic reticulum to cytosol transport	-5.65584	-3.37285	7/27	20338,22027,66212,67819,76577,217365,269523	Sel1l,Hsp90b1,Sec61b,Derl1,Faf2,Nploc4,Vcp
1_Member	GO Biological Processes	GO:0030970	retrograde protein transport, ER to cytosol	-5.65584	-3.37285	7/27	20338,22027,66212,67819,76577,217365,269523	Sel1l,Hsp90b1,Sec61b,Derl1,Faf2,Nploc4,Vcp
1_Member	GO Biological Processes	GO:0030433	ubiquitin-dependent ERAD pathway	-7.44805	-4.75421	13/79	14828,20338,22027,22393,56424,59025,66212,66861,67819,68292,76577,224727,269523	Hspa5,Sel1l,Hsp90b1,Wfs1,Stub1,Usp14,Sec61b,Dnajc10,Derl1,Stt3b,Faf2,Bag6,Vcp
1_Member	GO Biological Processes	GO:0036503	ERAD pathway	-7.81032	-5.01369	15/102	14828,20316,20338,22027,22393,56424,59025,66212,66861,67819,68292,76577,217365,224727,269523	Hspa5,Sdf2,Sel1l,Hsp90b1,Wfs1,Stub1,Usp14,Sec61b,Dnajc10,Derl1,Stt3b,Faf2,Nploc4,Bag6,Vcp
1_Member	GO Biological Processes	GO:0032527	protein exit from endoplasmic reticulum	-8.51151	-5.47877	11/43	20338,20660,22027,50907,66212,66397,67819,76577,99237,217365,269523	Sel1l,Sorl1,Hsp90b1,Preb,Sec61b,Sar1b,Derl1,Faf2,Tm9sf4,Nploc4,Vcp
1_Member	GO Biological Processes	GO:0034976	response to endoplasmic reticulum stress	-10.9163	-7.53992	28/254	12282,12330,12367,14251,14792,14827,14828,18453,20316,20338,22027,22393,56424,59025,66212,66861,67397,67819,67878,68292,68944,71853,76299,76577,217365,224727,269523,100037258	Hyou1,Canx,Casp3,Flot1,Lpcat3,Pdia3,Hspa5,P4hb,Sdf2,Sel1l,Hsp90b1,Wfs1,Stub1,Usp14,Sec61b,Dnajc10,Erp29,Derl1,Tmem33,Stt3b,Tmco1,Pdia6,Erp44,Faf2,Nploc4,Bag6,Vcp,Dnajc3
1_Member	KEGG Pathway	mmu04141	Protein processing in endoplasmic reticulum	-25.6974	-21.622	38/170	12282,12330,13135,13200,14376,14827,14828,16430,18415,18453,18786,19089,20335,20338,20832,22027,22393,50907,53421,56424,57377,66212,66397,66861,66890,67397,67819,68292,71853,72265,81910,103963,105245,140740,217365,269523,386649,100037258	Hyou1,Canx,Dad1,Ddost,Ganab,Pdia3,Hspa5,Stt3a,Hspa4l,P4hb,Plaa,Prkcsh,Sec61g,Sel1l,Ssr4,Hsp90b1,Wfs1,Preb,Sec61a1,Stub1,Mogs,Sec61b,Sar1b,Dnajc10,Lman2,Erp29,Derl1,Stt3b,Pdia6,Tram1,Rrbp1,Rpn1,Txndc5,Sec63,Nploc4,Vcp,Nsfl1c,Dnajc3
1_Member	GO Biological Processes	GO:0044257	cellular protein catabolic process	-5.10607	-2.93105	39/779	12306,13000,13030,14083,14084,14824,14828,16971,17025,17698,18786,19170,19349,20316,20338,22027,22201,22393,27060,56424,59025,66212,66861,66881,66887,67819,68292,69077,74996,76577,81018,213990,217365,224727,224826,269523,271564,386649,100037258	Anxa2,Csnk2a2,Ctsb,Ptk2,Faf1,Grn,Hspa5,Lrp1,Alad,Msn,Plaa,Psmb1,Rab7,Sdf2,Sel1l,Hsp90b1,Uba1,Wfs1,Tcirg1,Stub1,Usp14,Sec61b,Dnajc10,Pcyox1,Lonp2,Derl1,Stt3b,Psmd11,Usp47,Faf2,Rnf114,Agap3,Nploc4,Bag6,Ubr2,Vcp,Vps13a,Nsfl1c,Dnajc3
2_Summary	Reactome Gene Sets	R-MMU-6798695	Neutrophil degranulation	-23.693	-19.7937	59/510	11676,11772,11821,11848,11886,12306,12331,12359,13010,13030,13200,13627,13629,13830,14387,14751,14824,15369,16004,16592,16790,17025,17159,18475,19170,19330,19346,19349,19353,20932,22154,22330,27060,56212,57437,66612,68365,69077,71902,72042,72157,72461,75612,76299,76577,104112,105245,106572,109620,109754,110006,110078,110173,215449,227613,235606,269523,544963,100037258	Aldoc,Ap2a2,Aprt,Rhoa,Asah1,Anxa2,Cap1,Cat,Cst3,Ctsb,Ddost,Eef1a1,Eef2,Stom,Gaa,Gpi1,Grn,Hmox2,Igf2r,Fabp5,Anpep,Alad,Man2b1,Pafah1b2,Psmb1,Rab18,Rab6a,Rab7,Rac1,Surf4,Tubb5,Vcl,Tcirg1,Rhog,Golga7,Ormdl3,Rab14,Psmd11,Cand1,Cotl1,Pgm1,Prcp,Gns,Erp44,Faf2,Acly,Txndc5,Rab31,Dsp,Cyb5r3,Gusb,Pygb,Manba,Rap1b,Tubb4b,Apeh,Vcp,Iqgap2,Dnajc3
2_Member	Reactome Gene Sets	R-MMU-6798695	Neutrophil degranulation	-23.693	-19.7937	59/510	11676,11772,11821,11848,11886,12306,12331,12359,13010,13030,13200,13627,13629,13830,14387,14751,14824,15369,16004,16592,16790,17025,17159,18475,19170,19330,19346,19349,19353,20932,22154,22330,27060,56212,57437,66612,68365,69077,71902,72042,72157,72461,75612,76299,76577,104112,105245,106572,109620,109754,110006,110078,110173,215449,227613,235606,269523,544963,100037258	Aldoc,Ap2a2,Aprt,Rhoa,Asah1,Anxa2,Cap1,Cat,Cst3,Ctsb,Ddost,Eef1a1,Eef2,Stom,Gaa,Gpi1,Grn,Hmox2,Igf2r,Fabp5,Anpep,Alad,Man2b1,Pafah1b2,Psmb1,Rab18,Rab6a,Rab7,Rac1,Surf4,Tubb5,Vcl,Tcirg1,Rhog,Golga7,Ormdl3,Rab14,Psmd11,Cand1,Cotl1,Pgm1,Prcp,Gns,Erp44,Faf2,Acly,Txndc5,Rab31,Dsp,Cyb5r3,Gusb,Pygb,Manba,Rap1b,Tubb4b,Apeh,Vcp,Iqgap2,Dnajc3
3_Summary	GO Molecular Functions	GO:0005200	structural constituent of cytoskeleton	-9.68429	-6.512	14/64	11465,13823,18810,20741,22143,22154,22352,27360,67951,68089,74117,76709,103733,227613,11603,12740,16001,16779,20743,22330,50529,64659,66292,68028,69077,109620,109711,170762,223650	Actg1,Epb41l3,Plec,Sptb,Tuba1b,Tubb5,Vim,Add3,Tubb6,Arpc4,Actr3,Arpc2,Tubg1,Tubb4b,Agrn,Cldn4,Igf1r,Lamb2,Sptbn2,Vcl,Mrps7,Mrps14,Mrps21,Rpl22l1,Psmd11,Dsp,Actn1,Nup155,Eppk1
3_Member	GO Molecular Functions	GO:0005200	structural constituent of cytoskeleton	-9.68429	-6.512	14/64	11465,13823,18810,20741,22143,22154,22352,27360,67951,68089,74117,76709,103733,227613	Actg1,Epb41l3,Plec,Sptb,Tuba1b,Tubb5,Vim,Add3,Tubb6,Arpc4,Actr3,Arpc2,Tubg1,Tubb4b
3_Member	GO Molecular Functions	GO:0005198	structural molecule activity	-3.965	-2.05397	29/577	11465,11603,12740,13823,16001,16779,18810,20741,20743,22143,22154,22330,22352,27360,50529,64659,66292,67951,68028,68089,69077,74117,76709,103733,109620,109711,170762,223650,227613	Actg1,Agrn,Cldn4,Epb41l3,Igf1r,Lamb2,Plec,Sptb,Sptbn2,Tuba1b,Tubb5,Vcl,Vim,Add3,Mrps7,Mrps14,Mrps21,Tubb6,Rpl22l1,Arpc4,Psmd11,Actr3,Arpc2,Tubg1,Dsp,Actn1,Nup155,Eppk1,Tubb4b
4_Summary	GO Biological Processes	GO:0072657	protein localization to membrane	-7.69409	-4.94093	38/589	11603,11773,11774,12306,12361,13660,13823,13830,14251,14252,14828,16971,18711,19349,19353,20335,50918,53421,56212,56320,57437,65106,66087,66212,66455,66736,72265,72993,74117,74205,76709,99237,106572,140740,170762,192176,224727,329877	Agrn,Ap2m1,Ap3b1,Anxa2,Cask,Ehd1,Epb41l3,Stom,Flot1,Flot2,Hspa5,Lrp1,Pikfyve,Rab7,Rac1,Sec61g,Myadm,Sec61a1,Rhog,Dbn1,Golga7,Arl6ip5,Emc3,Sec61b,Cnpy4,Emc2,Tram1,Appl1,Actr3,Acsl3,Arpc2,Tm9sf4,Rab31,Sec63,Nup155,Flna,Bag6,Dennd4c
4_Member	GO Biological Processes	GO:0072657	protein localization to membrane	-7.69409	-4.94093	38/589	11603,11773,11774,12306,12361,13660,13823,13830,14251,14252,14828,16971,18711,19349,19353,20335,50918,53421,56212,56320,57437,65106,66087,66212,66455,66736,72265,72993,74117,74205,76709,99237,106572,140740,170762,192176,224727,329877	Agrn,Ap2m1,Ap3b1,Anxa2,Cask,Ehd1,Epb41l3,Stom,Flot1,Flot2,Hspa5,Lrp1,Pikfyve,Rab7,Rac1,Sec61g,Myadm,Sec61a1,Rhog,Dbn1,Golga7,Arl6ip5,Emc3,Sec61b,Cnpy4,Emc2,Tram1,Appl1,Actr3,Acsl3,Arpc2,Tm9sf4,Rab31,Sec63,Nup155,Flna,Bag6,Dennd4c
4_Member	GO Biological Processes	GO:0072659	protein localization to plasma membrane	-5.12463	-2.93518	21/296	11773,12306,12361,13660,13823,14251,14252,16971,19349,19353,50918,56212,57437,65106,66455,72993,74117,74205,106572,192176,329877	Ap2m1,Anxa2,Cask,Ehd1,Epb41l3,Flot1,Flot2,Lrp1,Rab7,Rac1,Myadm,Rhog,Golga7,Arl6ip5,Cnpy4,Appl1,Actr3,Acsl3,Rab31,Flna,Dennd4c
4_Member	GO Biological Processes	GO:1990778	protein localization to cell periphery	-3.76612	-1.88664	21/367	11773,12306,12361,13660,13823,14251,14252,16971,19349,19353,50918,56212,57437,65106,66455,72993,74117,74205,106572,192176,329877	Ap2m1,Anxa2,Cask,Ehd1,Epb41l3,Flot1,Flot2,Lrp1,Rab7,Rac1,Myadm,Rhog,Golga7,Arl6ip5,Cnpy4,Appl1,Actr3,Acsl3,Rab31,Flna,Dennd4c
5_Summary	GO Biological Processes	GO:0031647	regulation of protein stability	-7.51173	-4.79807	25/293	11785,12367,13135,13200,14251,14252,14824,15194,16987,18645,19035,22393,22404,29816,56424,57437,67819,68563,68585,74996,100226,192176,215114,224727,224824	Apbb1,Casp3,Dad1,Ddost,Flot1,Flot2,Grn,Htt,Lss,Pfn2,Ppib,Wfs1,Wiz,Hip1r,Stub1,Golga7,Derl1,Dpm3,Rtn4,Usp47,Stx12,Flna,Hip1,Bag6,Pex6
5_Member	GO Biological Processes	GO:0031647	regulation of protein stability	-7.51173	-4.79807	25/293	11785,12367,13135,13200,14251,14252,14824,15194,16987,18645,19035,22393,22404,29816,56424,57437,67819,68563,68585,74996,100226,192176,215114,224727,224824	Apbb1,Casp3,Dad1,Ddost,Flot1,Flot2,Grn,Htt,Lss,Pfn2,Ppib,Wfs1,Wiz,Hip1r,Stub1,Golga7,Derl1,Dpm3,Rtn4,Usp47,Stx12,Flna,Hip1,Bag6,Pex6
5_Member	GO Biological Processes	GO:0050821	protein stabilization	-5.21964	-3.01932	16/181	11785,14251,14252,14824,18645,19035,22393,22404,29816,57437,68585,100226,192176,215114,224727,224824	Apbb1,Flot1,Flot2,Grn,Pfn2,Ppib,Wfs1,Wiz,Hip1r,Golga7,Rtn4,Stx12,Flna,Hip1,Bag6,Pex6
6_Summary	Reactome Gene Sets	R-MMU-199977	ER to Golgi Anterograde Transport	-14.4686	-10.6943	17/142	11840,12343,13191,20743,22143,50907,54130,66397,66890,66913,67511,67665,67951,68097,69654,77038,227613,16563,20932,224630,11772,11773,12330,13030,14225,14827,14828,17534,19170,19247,19349,19353,22201,56424,67151,69077,71770,81018,215449,217342,224826,232910,240028,17158,16004,18475,18476,19330,19346,58244,109181,11465,11774,12874,13858,29816,68089,68365,74117,75612,76709,105245,106572,108679,2151…	Arf1,Capza2,Dctn1,Sptbn2,Tuba1b,Preb,Actr1a,Sar1b,Lman2,Kdelr2,Tmed9,Dctn4,Tubb6,Dynll2,Dctn2,Arfgap2,Tubb4b,Kif2a,Surf4,Bnip1,Ap2a2,Ap2m1,Canx,Ctsb,Fkbp1a,Pdia3,Hspa5,Mrc2,Psmb1,Ptpn11,Rab7,Rac1,Uba1,Stub1,Psmd9,Psmd11,Ap2b1,Rnf114,Rap1b,Ube2o,Ubr2,Ap2s1,Lnpep,Man2a1,Igf2r,Pafah1b2,Pafah1b3,Rab18,Rab6a,Stx6,Trip11,Actg1,Ap3b1,Cpd,Eps15,Hip1r,Arpc4,Rab14,Actr3,Gns,Arpc2,Txndc5,Rab31,Cops8,Hip1,De…
6_Member	Reactome Gene Sets	R-MMU-199977	ER to Golgi Anterograde Transport	-7.3944	-4.71696	17/142	11840,12343,13191,20743,22143,50907,54130,66397,66890,66913,67511,67665,67951,68097,69654,77038,227613	Arf1,Capza2,Dctn1,Sptbn2,Tuba1b,Preb,Actr1a,Sar1b,Lman2,Kdelr2,Tmed9,Dctn4,Tubb6,Dynll2,Dctn2,Arfgap2,Tubb4b
6_Member	Reactome Gene Sets	R-MMU-6811434	COPI-dependent Golgi-to-ER retrograde traffic	-4.30957	-2.30237	10/90	11840,16563,20932,22143,66913,67511,67951,77038,224630,227613	Arf1,Kif2a,Surf4,Tuba1b,Kdelr2,Tmed9,Tubb6,Arfgap2,Bnip1,Tubb4b
6_Member	Reactome Gene Sets	R-MMU-3371497	HSP90 chaperone cycle for steroid hormone receptors (SHR)	-5.67278	-3.38272	9/50	12343,13191,22143,54130,67665,67951,68097,69654,227613	Capza2,Dctn1,Tuba1b,Actr1a,Dctn4,Tubb6,Dynll2,Dctn2,Tubb4b
6_Member	Reactome Gene Sets	R-MMU-1280218	Adaptive Immune System	-5.67786	-3.38423	36/653	11772,11773,11840,12330,12343,13030,13191,14225,14827,14828,16563,17534,19170,19247,19349,19353,20743,22143,22201,54130,56424,66397,67151,67665,67951,68097,69077,69654,71770,81018,215449,217342,224826,227613,232910,240028	Ap2a2,Ap2m1,Arf1,Canx,Capza2,Ctsb,Dctn1,Fkbp1a,Pdia3,Hspa5,Kif2a,Mrc2,Psmb1,Ptpn11,Rab7,Rac1,Sptbn2,Tuba1b,Uba1,Actr1a,Stub1,Sar1b,Psmd9,Dctn4,Tubb6,Dynll2,Psmd11,Dctn2,Ap2b1,Rnf114,Rap1b,Ube2o,Ubr2,Tubb4b,Ap2s1,Lnpep
6_Member	Reactome Gene Sets	R-MMU-948021	Transport to the Golgi and subsequent modification	-6.9621	-4.34156	18/170	11840,12343,13191,17158,20743,22143,50907,54130,66397,66890,66913,67511,67665,67951,68097,69654,77038,227613	Arf1,Capza2,Dctn1,Man2a1,Sptbn2,Tuba1b,Preb,Actr1a,Sar1b,Lman2,Kdelr2,Tmed9,Dctn4,Tubb6,Dynll2,Dctn2,Arfgap2,Tubb4b
6_Member	Reactome Gene Sets	R-MMU-6807878	COPI-mediated anterograde transport	-7.64996	-4.917	14/90	11840,12343,13191,20743,22143,54130,66913,67511,67665,67951,68097,69654,77038,227613	Arf1,Capza2,Dctn1,Sptbn2,Tuba1b,Actr1a,Kdelr2,Tmed9,Dctn4,Tubb6,Dynll2,Dctn2,Arfgap2,Tubb4b
6_Member	Reactome Gene Sets	R-MMU-6811442	Intra-Golgi and retrograde Golgi-to-ER traffic	-10.5697	-7.23463	23/176	11840,12343,13191,16004,16563,18475,18476,19330,19346,20932,22143,54130,58244,66913,67511,67665,67951,68097,69654,77038,109181,224630,227613	Arf1,Capza2,Dctn1,Igf2r,Kif2a,Pafah1b2,Pafah1b3,Rab18,Rab6a,Surf4,Tuba1b,Actr1a,Stx6,Kdelr2,Tmed9,Dctn4,Tubb6,Dynll2,Dctn2,Arfgap2,Trip11,Bnip1,Tubb4b
6_Member	Reactome Gene Sets	R-MMU-6811436	COPI-independent Golgi-to-ER retrograde traffic	-10.2967	-6.99942	13/48	12343,13191,18475,18476,19330,19346,22143,54130,67665,67951,68097,69654,227613	Capza2,Dctn1,Pafah1b2,Pafah1b3,Rab18,Rab6a,Tuba1b,Actr1a,Dctn4,Tubb6,Dynll2,Dctn2,Tubb4b
6_Member	Reactome Gene Sets	R-MMU-8856688	Golgi-to-ER retrograde transport	-11.0315	-7.60936	20/123	11840,12343,13191,16563,18475,18476,19330,19346,20932,22143,54130,66913,67511,67665,67951,68097,69654,77038,224630,227613	Arf1,Capza2,Dctn1,Kif2a,Pafah1b2,Pafah1b3,Rab18,Rab6a,Surf4,Tuba1b,Actr1a,Kdelr2,Tmed9,Dctn4,Tubb6,Dynll2,Dctn2,Arfgap2,Bnip1,Tubb4b
6_Member	Reactome Gene Sets	R-MMU-2132295	MHC class II antigen presentation	-11.2366	-7.7053	20/120	11772,11773,11840,12330,12343,13030,13191,16563,19349,20743,22143,54130,66397,67665,67951,68097,69654,71770,227613,232910	Ap2a2,Ap2m1,Arf1,Canx,Capza2,Ctsb,Dctn1,Kif2a,Rab7,Sptbn2,Tuba1b,Actr1a,Sar1b,Dctn4,Tubb6,Dynll2,Dctn2,Ap2b1,Tubb4b,Ap2s1
6_Member	Reactome Gene Sets	R-MMU-199991	Membrane Trafficking	-14.1875	-10.5101	47/534	11465,11772,11773,11774,11840,12343,12874,13191,13858,16004,16563,18475,18476,19330,19346,19349,20743,20932,22143,29816,50907,54130,58244,66397,66890,66913,67511,67665,67951,68089,68097,68365,69654,71770,74117,75612,76709,77038,105245,106572,108679,109181,215114,224630,227613,232910,329877	Actg1,Ap2a2,Ap2m1,Ap3b1,Arf1,Capza2,Cpd,Dctn1,Eps15,Igf2r,Kif2a,Pafah1b2,Pafah1b3,Rab18,Rab6a,Rab7,Sptbn2,Surf4,Tuba1b,Hip1r,Preb,Actr1a,Stx6,Sar1b,Lman2,Kdelr2,Tmed9,Dctn4,Tubb6,Arpc4,Dynll2,Rab14,Dctn2,Ap2b1,Actr3,Gns,Arpc2,Arfgap2,Txndc5,Rab31,Cops8,Trip11,Hip1,Bnip1,Tubb4b,Ap2s1,Dennd4c
6_Member	Reactome Gene Sets	R-MMU-5653656	Vesicle-mediated transport	-14.4686	-10.6943	49/567	11465,11772,11773,11774,11840,12343,12874,13191,13858,16004,16563,16971,18475,18476,19330,19346,19349,20743,20932,22027,22143,29816,50907,54130,58244,66397,66890,66913,67511,67665,67951,68089,68097,68365,69654,71770,74117,75612,76709,77038,105245,106572,108679,109181,215114,224630,227613,232910,329877	Actg1,Ap2a2,Ap2m1,Ap3b1,Arf1,Capza2,Cpd,Dctn1,Eps15,Igf2r,Kif2a,Lrp1,Pafah1b2,Pafah1b3,Rab18,Rab6a,Rab7,Sptbn2,Surf4,Hsp90b1,Tuba1b,Hip1r,Preb,Actr1a,Stx6,Sar1b,Lman2,Kdelr2,Tmed9,Dctn4,Tubb6,Arpc4,Dynll2,Rab14,Dctn2,Ap2b1,Actr3,Gns,Arpc2,Arfgap2,Txndc5,Rab31,Cops8,Trip11,Hip1,Bnip1,Tubb4b,Ap2s1,Dennd4c
6_Member	Reactome Gene Sets	R-MMU-446203	Asparagine N-linked glycosylation	-8.7327	-5.63504	25/255	11840,12330,12343,13191,13480,14827,17158,20743,22143,50907,54130,56737,66397,66890,66913,67511,67665,67819,67951,68097,68563,69654,77038,227613,269523	Arf1,Canx,Capza2,Dctn1,Dpm1,Pdia3,Man2a1,Sptbn2,Tuba1b,Preb,Actr1a,Alg2,Sar1b,Lman2,Kdelr2,Tmed9,Dctn4,Derl1,Tubb6,Dynll2,Dpm3,Dctn2,Arfgap2,Tubb4b,Vcp
7_Summary	GO Biological Processes	GO:0007029	endoplasmic reticulum organization	-6.99464	-4.36641	13/86	14792,15194,19330,52635,53421,66087,66736,66890,67878,68585,72265,224630,224727	Lpcat3,Htt,Rab18,Esyt2,Sec61a1,Emc3,Emc2,Lman2,Tmem33,Rtn4,Tram1,Bnip1,Bag6
7_Member	GO Biological Processes	GO:0007029	endoplasmic reticulum organization	-6.99464	-4.36641	13/86	14792,15194,19330,52635,53421,66087,66736,66890,67878,68585,72265,224630,224727	Lpcat3,Htt,Rab18,Esyt2,Sec61a1,Emc3,Emc2,Lman2,Tmem33,Rtn4,Tram1,Bnip1,Bag6
7_Member	GO Biological Processes	GO:0045048	protein insertion into ER membrane	-3.05789	-1.35726	4/19	66087,66736,72265,224727	Emc3,Emc2,Tram1,Bag6
7_Member	GO Biological Processes	GO:0071816	tail-anchored membrane protein insertion into ER membrane	-2.24279	-0.783353	3/16	66087,66736,224727	Emc3,Emc2,Bag6
8_Summary	GO Molecular Functions	GO:0019901	protein kinase binding	-6.30056	-3.84323	41/750	11475,11747,11757,11772,11848,11928,12928,12934,13191,13627,13629,14083,14084,14886,14936,16202,16563,16897,17698,18611,19089,19247,19268,19353,20382,20498,20499,22288,22352,27360,56212,64652,69654,72590,72993,74205,109620,110651,192176,192662,100037258	Acta2,Anxa5,Prdx3,Ap2a2,Rhoa,Atp1a1,Crk,Dpysl2,Dctn1,Eef1a1,Eef2,Ptk2,Faf1,Gtf2i,Gys1,Ilk,Kif2a,Llgl1,Msn,Pea15a,Prkcsh,Ptpn11,Ptprf,Rac1,Srsf2,Slc12a4,Slc12a7,Utrn,Vim,Add3,Rhog,Nisch,Dctn2,Ppme1,Appl1,Acsl3,Dsp,Rps6ka3,Flna,Arhgdia,Dnajc3
8_Member	GO Molecular Functions	GO:0019901	protein kinase binding	-6.30056	-3.84323	41/750	11475,11747,11757,11772,11848,11928,12928,12934,13191,13627,13629,14083,14084,14886,14936,16202,16563,16897,17698,18611,19089,19247,19268,19353,20382,20498,20499,22288,22352,27360,56212,64652,69654,72590,72993,74205,109620,110651,192176,192662,100037258	Acta2,Anxa5,Prdx3,Ap2a2,Rhoa,Atp1a1,Crk,Dpysl2,Dctn1,Eef1a1,Eef2,Ptk2,Faf1,Gtf2i,Gys1,Ilk,Kif2a,Llgl1,Msn,Pea15a,Prkcsh,Ptpn11,Ptprf,Rac1,Srsf2,Slc12a4,Slc12a7,Utrn,Vim,Add3,Rhog,Nisch,Dctn2,Ppme1,Appl1,Acsl3,Dsp,Rps6ka3,Flna,Arhgdia,Dnajc3
9_Summary	Reactome Gene Sets	R-MMU-382551	Transport of small molecules	-6.10291	-3.68074	37/653	11428,11772,11773,11928,13830,14688,14693,14701,14702,15369,18453,19170,20338,20498,20499,20539,21871,26569,27060,27360,27376,66397,67151,67819,67972,68267,69077,71770,71902,74104,105847,110611,170759,224742,232910,241296,269523	Aco1,Ap2a2,Ap2m1,Atp1a1,Stom,Gnb1,Gnb2,Gng12,Gng2,Hmox2,P4hb,Psmb1,Sel1l,Slc12a4,Slc12a7,Slc7a5,Atp6v0a2,Slc27a4,Tcirg1,Add3,Slc25a10,Sar1b,Psmd9,Derl1,Atp2b1,Slc25a22,Psmd11,Ap2b1,Cand1,Abcb6,Lmf2,Hdlbp,Atp13a1,Abcf1,Ap2s1,Lrrc8a,Vcp
9_Member	Reactome Gene Sets	R-MMU-382551	Transport of small molecules	-6.10291	-3.68074	37/653	11428,11772,11773,11928,13830,14688,14693,14701,14702,15369,18453,19170,20338,20498,20499,20539,21871,26569,27060,27360,27376,66397,67151,67819,67972,68267,69077,71770,71902,74104,105847,110611,170759,224742,232910,241296,269523	Aco1,Ap2a2,Ap2m1,Atp1a1,Stom,Gnb1,Gnb2,Gng12,Gng2,Hmox2,P4hb,Psmb1,Sel1l,Slc12a4,Slc12a7,Slc7a5,Atp6v0a2,Slc27a4,Tcirg1,Add3,Slc25a10,Sar1b,Psmd9,Derl1,Atp2b1,Slc25a22,Psmd11,Ap2b1,Cand1,Abcb6,Lmf2,Hdlbp,Atp13a1,Abcf1,Ap2s1,Lrrc8a,Vcp
10_Summary	GO Biological Processes	GO:0007033	vacuole organization	-5.93803	-3.54693	17/179	11774,11840,12306,14387,14824,15211,17158,18711,19349,21982,27060,64143,66734,68365,100226,110147,386649,106572,19244,19330,19346,59021	Ap3b1,Arf1,Anxa2,Gaa,Grn,Hexa,Man2a1,Pikfyve,Rab7,Tmem165,Tcirg1,Ralb,Map1lc3a,Rab14,Stx12,Ehmt2,Nsfl1c,Rab31,Ptp4a2,Rab18,Rab6a,Rab2a
10_Member	GO Biological Processes	GO:0007033	vacuole organization	-5.93803	-3.54693	17/179	11774,11840,12306,14387,14824,15211,17158,18711,19349,21982,27060,64143,66734,68365,100226,110147,386649	Ap3b1,Arf1,Anxa2,Gaa,Grn,Hexa,Man2a1,Pikfyve,Rab7,Tmem165,Tcirg1,Ralb,Map1lc3a,Rab14,Stx12,Ehmt2,Nsfl1c
10_Member	GO Biological Processes	GO:0007040	lysosome organization	-4.19774	-2.2363	9/75	11774,11840,14387,14824,15211,18711,19349,21982,68365	Ap3b1,Arf1,Gaa,Grn,Hexa,Pikfyve,Rab7,Tmem165,Rab14
10_Member	GO Biological Processes	GO:0080171	lytic vacuole organization	-4.19774	-2.2363	9/75	11774,11840,14387,14824,15211,18711,19349,21982,68365	Ap3b1,Arf1,Gaa,Grn,Hexa,Pikfyve,Rab7,Tmem165,Rab14
10_Member	GO Biological Processes	GO:0090382	phagosome maturation	-3.51701	-1.70289	5/26	18711,19349,27060,68365,106572	Pikfyve,Rab7,Tcirg1,Rab14,Rab31
10_Member	Reactome Gene Sets	R-MMU-8873719	RAB geranylgeranylation	-3.44545	-1.6475	7/57	19244,19330,19346,19349,59021,68365,106572	Ptp4a2,Rab18,Rab6a,Rab7,Rab2a,Rab14,Rab31
10_Member	GO Biological Processes	GO:0001845	phagolysosome assembly	-2.24279	-0.783353	3/16	18711,19349,68365	Pikfyve,Rab7,Rab14
11_Summary	GO Biological Processes	GO:0007030	Golgi organization	-11.0455	-7.60936	14/127	15194,17083,20932,26417,58244,59021,66676,66890,67511,78885,103694,109181,217365,386649,11840,12282,20660,50907,66397,66913,67397,98417,269523,11603,11774,13191,13823,14251,14792,19330,20741,52635,53421,66087,66736,67878,68585,72265,74122,77579,170762,223697,224630,224727,13858,16897,17912,18797,19346,55988,57437,68365,74205,77038,106572	Htt,Tmed1,Surf4,Mapk3,Stx6,Rab2a,Tmed7,Lman2,Tmed9,Coro7,Tmed4,Trip11,Nploc4,Nsfl1c,Arf1,Hyou1,Sorl1,Preb,Sar1b,Kdelr2,Erp29,Cnih4,Vcp,Agrn,Ap3b1,Dctn1,Epb41l3,Flot1,Lpcat3,Rab18,Sptb,Esyt2,Sec61a1,Emc3,Emc2,Tmem33,Rtn4,Tram1,Tmem43,Myh10,Nup155,Sun2,Bnip1,Bag6,Eps15,Llgl1,Myo1b,Plcb3,Rab6a,Snx12,Golga7,Rab14,Acsl3,Arfgap2,Rab31
11_Member	GO Biological Processes	GO:0007030	Golgi organization	-5.7594	-3.4373	14/127	15194,17083,20932,26417,58244,59021,66676,66890,67511,78885,103694,109181,217365,386649	Htt,Tmed1,Surf4,Mapk3,Stx6,Rab2a,Tmed7,Lman2,Tmed9,Coro7,Tmed4,Trip11,Nploc4,Nsfl1c
11_Member	GO Biological Processes	GO:0006888	endoplasmic reticulum to Golgi vesicle-mediated transport	-7.87947	-5.04193	16/116	11840,12282,15194,17083,20660,50907,66397,66676,66890,66913,67397,67511,98417,103694,109181,269523	Arf1,Hyou1,Htt,Tmed1,Sorl1,Preb,Sar1b,Tmed7,Lman2,Kdelr2,Erp29,Tmed9,Cnih4,Tmed4,Trip11,Vcp
11_Member	GO Biological Processes	GO:0010256	endomembrane system organization	-9.70521	-6.512	35/431	11603,11774,13191,13823,14251,14792,15194,17083,19330,20741,20932,26417,52635,53421,58244,59021,66087,66676,66736,66890,67511,67878,68585,72265,74122,77579,78885,103694,109181,170762,217365,223697,224630,224727,386649	Agrn,Ap3b1,Dctn1,Epb41l3,Flot1,Lpcat3,Htt,Tmed1,Rab18,Sptb,Surf4,Mapk3,Esyt2,Sec61a1,Stx6,Rab2a,Emc3,Tmed7,Emc2,Lman2,Tmed9,Tmem33,Rtn4,Tram1,Tmem43,Myh10,Coro7,Tmed4,Trip11,Nup155,Nploc4,Sun2,Bnip1,Bag6,Nsfl1c
11_Member	GO Biological Processes	GO:0048193	Golgi vesicle transport	-11.0455	-7.60936	29/269	11840,12282,13858,15194,16897,17083,17912,18797,19346,20660,50907,55988,57437,58244,66397,66676,66890,66913,67397,67511,68365,74205,77038,98417,103694,106572,109181,224630,269523	Arf1,Hyou1,Eps15,Htt,Llgl1,Tmed1,Myo1b,Plcb3,Rab6a,Sorl1,Preb,Snx12,Golga7,Stx6,Sar1b,Tmed7,Lman2,Kdelr2,Erp29,Tmed9,Rab14,Acsl3,Arfgap2,Cnih4,Tmed4,Rab31,Trip11,Bnip1,Vcp
12_Summary	GO Biological Processes	GO:1901617	organic hydroxy compound biosynthetic process	-8.66156	-5.59696	19/226	11886,13202,13360,13361,13595,14381,14792,15108,15194,16987,18194,18984,71780,72993,74551,74754,109754,110196,208715,74205,76267,15488,11928,16001,22668,106529,11363,11429,12359,13030,13480,14085,16332,16971,18797,19659,65970,67111,110611,219024,11430,11840,12408,12896,13000,13358,15211,16592,18711,26378,50767,52635,52858,66612,67041,68365,83493,93747,100705,104112,107476,110911,228061,264895,118…	Asah1,Ddt,Dhcr7,Dhfr,Ebp,G6pdx,Lpcat3,Hsd17b10,Htt,Lss,Nsdhl,Por,Isyna1,Appl1,Pck2,Dhcr24,Cyb5r3,Fdps,Hmgcs1,Acsl3,Fads1,Hsd17b4,Atp1a1,Igf1r,Sf1,Tecr,Acadl,Aco2,Cat,Ctsb,Dpm1,Fah,Inppl1,Lrp1,Plcb3,Rbp1,Lima1,Naaa,Hdlbp,Pip4p1,Acox1,Arf1,Cbr1,Cpt2,Csnk2a2,Slc25a1,Hexa,Fabp5,Pikfyve,Decr2,Pnpla6,Esyt2,Cdipt,Ormdl3,Oxct1,Rab14,Sacm1l,Echs1,Acacb,Acly,Acaca,Cds2,Agps,Acsf2,Aprt,Got2,Gpi1,Pgk1,Plod3,…
12_Member	GO Biological Processes	GO:1901617	organic hydroxy compound biosynthetic process	-5.75681	-3.4373	19/226	11886,13202,13360,13361,13595,14381,14792,15108,15194,16987,18194,18984,71780,72993,74551,74754,109754,110196,208715	Asah1,Ddt,Dhcr7,Dhfr,Ebp,G6pdx,Lpcat3,Hsd17b10,Htt,Lss,Nsdhl,Por,Isyna1,Appl1,Pck2,Dhcr24,Cyb5r3,Fdps,Hmgcs1
12_Member	KEGG Pathway	M00101	Cholesterol biosynthesis, squalene 2,3-epoxide => cholesterol	-5.79888	-3.45989	5/10	13360,13595,16987,18194,74754	Dhcr7,Ebp,Lss,Nsdhl,Dhcr24
12_Member	KEGG Pathway	mmu_M00101	Cholesterol biosynthesis, squalene 2,3-epoxide => cholesterol	-5.79888	-3.45989	5/10	13360,13595,16987,18194,74754	Dhcr7,Ebp,Lss,Nsdhl,Dhcr24
12_Member	Reactome Gene Sets	R-MMU-191273	Cholesterol biosynthesis	-5.77735	-3.44626	7/26	13360,13595,16987,18194,74754,110196,208715	Dhcr7,Ebp,Lss,Nsdhl,Dhcr24,Fdps,Hmgcs1
12_Member	WikiPathways	WP4346	Cholesterol metabolism (includes both Bloch and Kandutsch-Russell pathways)	-5.59748	-3.32828	9/51	13360,13595,16987,18194,74205,74754,76267,110196,208715	Dhcr7,Ebp,Lss,Nsdhl,Acsl3,Dhcr24,Fads1,Fdps,Hmgcs1
12_Member	GO Biological Processes	GO:0046165	alcohol biosynthetic process	-6.21403	-3.77212	15/134	11886,13360,13361,13595,14381,14792,16987,18194,18984,71780,74551,74754,109754,110196,208715	Asah1,Dhcr7,Dhfr,Ebp,G6pdx,Lpcat3,Lss,Nsdhl,Por,Isyna1,Pck2,Dhcr24,Cyb5r3,Fdps,Hmgcs1
12_Member	Reactome Gene Sets	R-MMU-6807047	Cholesterol biosynthesis via desmosterol	-4.2977	-2.29604	3/4	13360,13595,74754	Dhcr7,Ebp,Dhcr24
12_Member	Reactome Gene Sets	R-MMU-6807062	Cholesterol biosynthesis via lathosterol	-4.2977	-2.29604	3/4	13360,13595,74754	Dhcr7,Ebp,Dhcr24
12_Member	KEGG Pathway	ko00100	Steroid biosynthesis	-4.21076	-2.24428	5/19	13360,13595,16987,18194,74754	Dhcr7,Ebp,Lss,Nsdhl,Dhcr24
12_Member	Reactome Gene Sets	R-MMU-8957322	Metabolism of steroids	-2.21887	-0.763099	8/116	13360,13595,15488,16987,18194,74754,110196,208715	Dhcr7,Ebp,Hsd17b4,Lss,Nsdhl,Dhcr24,Fdps,Hmgcs1
12_Member	WikiPathways	WP103	Cholesterol Biosynthesis	-4.76498	-2.64625	5/15	13360,16987,18194,110196,208715	Dhcr7,Lss,Nsdhl,Fdps,Hmgcs1
12_Member	GO Biological Processes	GO:0006694	steroid biosynthetic process	-6.59187	-4.06333	17/161	11886,11928,13360,13595,14381,14792,15108,16001,16987,18194,18984,22668,74754,106529,109754,110196,208715	Asah1,Atp1a1,Dhcr7,Ebp,G6pdx,Lpcat3,Hsd17b10,Igf1r,Lss,Nsdhl,Por,Sf1,Dhcr24,Tecr,Cyb5r3,Fdps,Hmgcs1
12_Member	KEGG Pathway	mmu00100	Steroid biosynthesis	-4.21076	-2.24428	5/19	13360,13595,16987,18194,74754	Dhcr7,Ebp,Lss,Nsdhl,Dhcr24
12_Member	GO Biological Processes	GO:1901615	organic hydroxy compound metabolic process	-6.81898	-4.23496	33/508	11363,11429,11886,12359,13030,13202,13360,13361,13480,13595,14085,14381,14792,15108,15194,16332,16971,16987,18194,18797,18984,19659,65970,67111,71780,72993,74551,74754,109754,110196,110611,208715,219024	Acadl,Aco2,Asah1,Cat,Ctsb,Ddt,Dhcr7,Dhfr,Dpm1,Ebp,Fah,G6pdx,Lpcat3,Hsd17b10,Htt,Inppl1,Lrp1,Lss,Nsdhl,Plcb3,Por,Rbp1,Lima1,Naaa,Isyna1,Appl1,Pck2,Dhcr24,Cyb5r3,Fdps,Hdlbp,Hmgcs1,Pip4p1
12_Member	Reactome Gene Sets	R-MMU-556833	Metabolism of lipids	-8.66156	-5.59696	40/591	11363,11430,11840,11886,12408,12896,13000,13358,13360,13595,14792,15211,15488,16332,16592,16987,18194,18711,26378,50767,52635,52858,66612,67041,68365,74205,74754,76267,83493,93747,100705,104112,106529,107476,110196,110911,208715,219024,228061,264895	Acadl,Acox1,Arf1,Asah1,Cbr1,Cpt2,Csnk2a2,Slc25a1,Dhcr7,Ebp,Lpcat3,Hexa,Hsd17b4,Inppl1,Fabp5,Lss,Nsdhl,Pikfyve,Decr2,Pnpla6,Esyt2,Cdipt,Ormdl3,Oxct1,Rab14,Acsl3,Dhcr24,Fads1,Sacm1l,Echs1,Acacb,Acly,Tecr,Acaca,Fdps,Cds2,Hmgcs1,Pip4p1,Agps,Acsf2
12_Member	GO Biological Processes	GO:1902652	secondary alcohol metabolic process	-8.04428	-5.13027	18/145	11363,11429,12359,13360,13595,14381,14792,16971,16987,18194,18984,65970,74754,109754,110196,110611,208715,219024	Acadl,Aco2,Cat,Dhcr7,Ebp,G6pdx,Lpcat3,Lrp1,Lss,Nsdhl,Por,Lima1,Dhcr24,Cyb5r3,Fdps,Hdlbp,Hmgcs1,Pip4p1
12_Member	GO Biological Processes	GO:0044283	small molecule biosynthetic process	-7.95238	-5.06733	39/601	11363,11821,11886,13360,13361,13595,14381,14719,14751,14792,15108,15194,16592,16987,18194,18655,18984,19659,26378,26433,50773,66194,71780,74205,74551,74754,76267,100705,104112,106529,107476,108682,109754,109900,110196,208715,236539,246277,269523	Acadl,Aprt,Asah1,Dhcr7,Dhfr,Ebp,G6pdx,Got2,Gpi1,Lpcat3,Hsd17b10,Htt,Fabp5,Lss,Nsdhl,Pgk1,Por,Rbp1,Decr2,Plod3,Nt5c,Pycrl,Isyna1,Acsl3,Pck2,Dhcr24,Fads1,Acacb,Acly,Tecr,Acaca,Gpt2,Cyb5r3,Asl,Fdps,Hmgcs1,Phgdh,Csad,Vcp
12_Member	GO Biological Processes	GO:0008203	cholesterol metabolic process	-7.87431	-5.04193	17/132	11363,12359,13360,13595,14381,14792,16971,16987,18194,18984,65970,74754,109754,110196,110611,208715,219024	Acadl,Cat,Dhcr7,Ebp,G6pdx,Lpcat3,Lrp1,Lss,Nsdhl,Por,Lima1,Dhcr24,Cyb5r3,Fdps,Hdlbp,Hmgcs1,Pip4p1
12_Member	GO Biological Processes	GO:0006695	cholesterol biosynthetic process	-7.86204	-5.04193	11/49	13360,13595,14381,14792,16987,18194,18984,74754,109754,110196,208715	Dhcr7,Ebp,G6pdx,Lpcat3,Lss,Nsdhl,Por,Dhcr24,Cyb5r3,Fdps,Hmgcs1
12_Member	GO Biological Processes	GO:0008202	steroid metabolic process	-6.79507	-4.218	25/319	11363,11886,11928,12359,13360,13595,14381,14792,15108,15488,16001,16971,16987,18194,18984,22668,56424,65970,74754,106529,109754,110196,110611,208715,219024	Acadl,Asah1,Atp1a1,Cat,Dhcr7,Ebp,G6pdx,Lpcat3,Hsd17b10,Hsd17b4,Igf1r,Lrp1,Lss,Nsdhl,Por,Sf1,Stub1,Lima1,Dhcr24,Tecr,Cyb5r3,Fdps,Hdlbp,Hmgcs1,Pip4p1
12_Member	GO Biological Processes	GO:0006066	alcohol metabolic process	-7.84832	-5.04011	27/324	11363,11429,11886,12359,13360,13361,13480,13595,14381,14792,16332,16971,16987,18194,18797,18984,19659,65970,67111,71780,74551,74754,109754,110196,110611,208715,219024	Acadl,Aco2,Asah1,Cat,Dhcr7,Dhfr,Dpm1,Ebp,G6pdx,Lpcat3,Inppl1,Lrp1,Lss,Nsdhl,Plcb3,Por,Rbp1,Lima1,Naaa,Isyna1,Pck2,Dhcr24,Cyb5r3,Fdps,Hdlbp,Hmgcs1,Pip4p1
12_Member	GO Biological Processes	GO:0016125	sterol metabolic process	-7.44042	-4.75421	17/141	11363,12359,13360,13595,14381,14792,16971,16987,18194,18984,65970,74754,109754,110196,110611,208715,219024	Acadl,Cat,Dhcr7,Ebp,G6pdx,Lpcat3,Lrp1,Lss,Nsdhl,Por,Lima1,Dhcr24,Cyb5r3,Fdps,Hdlbp,Hmgcs1,Pip4p1
12_Member	GO Biological Processes	GO:0016126	sterol biosynthetic process	-7.30364	-4.64323	11/55	13360,13595,14381,14792,16987,18194,18984,74754,109754,110196,208715	Dhcr7,Ebp,G6pdx,Lpcat3,Lss,Nsdhl,Por,Dhcr24,Cyb5r3,Fdps,Hmgcs1
12_Member	GO Biological Processes	GO:0008610	lipid biosynthetic process	-7.05982	-4.42377	37/597	11363,11886,11928,13360,13480,13595,14381,14792,15108,16001,16332,16592,16987,18194,18984,19659,22668,26378,52858,66612,68563,71780,74205,74551,74754,76267,78928,100705,104112,106529,107476,109754,110196,110911,208715,228061,382030	Acadl,Asah1,Atp1a1,Dhcr7,Dpm1,Ebp,G6pdx,Lpcat3,Hsd17b10,Igf1r,Inppl1,Fabp5,Lss,Nsdhl,Por,Rbp1,Sf1,Decr2,Cdipt,Ormdl3,Dpm3,Isyna1,Acsl3,Pck2,Dhcr24,Fads1,Pigt,Acacb,Acly,Tecr,Acaca,Cyb5r3,Fdps,Cds2,Hmgcs1,Agps,Cnep1r1
12_Member	GO Biological Processes	GO:1902653	secondary alcohol biosynthetic process	-7.86204	-5.04193	11/49	13360,13595,14381,14792,16987,18194,18984,74754,109754,110196,208715	Dhcr7,Ebp,G6pdx,Lpcat3,Lss,Nsdhl,Por,Dhcr24,Cyb5r3,Fdps,Hmgcs1
13_Summary	GO Molecular Functions	GO:0019003	GDP binding	-7.98829	-5.089	11/78	11840,11848,19330,19349,20130,59021,64143,68365,106572,110639,215449,13627,13629,13660,14678,19346,19353,22143,22154,28088,56212,66397,67951,74551,103733,213990,227613,14688,14693,14701,14702	Arf1,Rhoa,Rab18,Rab7,Rras,Rab2a,Ralb,Rab14,Rab31,Prps2,Rap1b,Eef1a1,Eef2,Ehd1,Gnai2,Rab6a,Rac1,Tuba1b,Tubb5,Rtcb,Rhog,Sar1b,Tubb6,Pck2,Tubg1,Agap3,Tubb4b,Gnb1,Gnb2,Gng12,Gng2
13_Member	GO Molecular Functions	GO:0019003	GDP binding	-5.70146	-3.4006	11/78	11840,11848,19330,19349,20130,59021,64143,68365,106572,110639,215449	Arf1,Rhoa,Rab18,Rab7,Rras,Rab2a,Ralb,Rab14,Rab31,Prps2,Rap1b
13_Member	GO Molecular Functions	GO:0032561	guanyl ribonucleotide binding	-6.43316	-3.96523	27/380	11840,11848,13627,13629,13660,14678,19330,19346,19349,19353,20130,22143,22154,28088,56212,59021,64143,66397,67951,68365,74551,103733,106572,110639,213990,215449,227613	Arf1,Rhoa,Eef1a1,Eef2,Ehd1,Gnai2,Rab18,Rab6a,Rab7,Rac1,Rras,Tuba1b,Tubb5,Rtcb,Rhog,Rab2a,Ralb,Sar1b,Tubb6,Rab14,Pck2,Tubg1,Rab31,Prps2,Agap3,Rap1b,Tubb4b
13_Member	GO Molecular Functions	GO:0019001	guanyl nucleotide binding	-6.43316	-3.96523	27/380	11840,11848,13627,13629,13660,14678,19330,19346,19349,19353,20130,22143,22154,28088,56212,59021,64143,66397,67951,68365,74551,103733,106572,110639,213990,215449,227613	Arf1,Rhoa,Eef1a1,Eef2,Ehd1,Gnai2,Rab18,Rab6a,Rab7,Rac1,Rras,Tuba1b,Tubb5,Rtcb,Rhog,Rab2a,Ralb,Sar1b,Tubb6,Rab14,Pck2,Tubg1,Rab31,Prps2,Agap3,Rap1b,Tubb4b
13_Member	GO Molecular Functions	GO:0005525	GTP binding	-6.44481	-3.96523	26/356	11840,11848,13627,13629,13660,14678,19330,19346,19349,19353,20130,22143,22154,28088,56212,59021,64143,66397,67951,68365,74551,103733,106572,213990,215449,227613	Arf1,Rhoa,Eef1a1,Eef2,Ehd1,Gnai2,Rab18,Rab6a,Rab7,Rac1,Rras,Tuba1b,Tubb5,Rtcb,Rhog,Rab2a,Ralb,Sar1b,Tubb6,Rab14,Pck2,Tubg1,Rab31,Agap3,Rap1b,Tubb4b
13_Member	GO Molecular Functions	GO:0032550	purine ribonucleoside binding	-6.82949	-4.23841	27/363	11840,11848,13627,13629,13660,14678,19330,19346,19349,19353,20130,22143,22154,28088,56212,59021,64143,66397,67951,68365,74551,103733,106572,110639,213990,215449,227613	Arf1,Rhoa,Eef1a1,Eef2,Ehd1,Gnai2,Rab18,Rab6a,Rab7,Rac1,Rras,Tuba1b,Tubb5,Rtcb,Rhog,Rab2a,Ralb,Sar1b,Tubb6,Rab14,Pck2,Tubg1,Rab31,Prps2,Agap3,Rap1b,Tubb4b
13_Member	GO Molecular Functions	GO:0001883	purine nucleoside binding	-6.73384	-4.1835	27/367	11840,11848,13627,13629,13660,14678,19330,19346,19349,19353,20130,22143,22154,28088,56212,59021,64143,66397,67951,68365,74551,103733,106572,110639,213990,215449,227613	Arf1,Rhoa,Eef1a1,Eef2,Ehd1,Gnai2,Rab18,Rab6a,Rab7,Rac1,Rras,Tuba1b,Tubb5,Rtcb,Rhog,Rab2a,Ralb,Sar1b,Tubb6,Rab14,Pck2,Tubg1,Rab31,Prps2,Agap3,Rap1b,Tubb4b
13_Member	GO Molecular Functions	GO:0032549	ribonucleoside binding	-6.75761	-4.20074	27/366	11840,11848,13627,13629,13660,14678,19330,19346,19349,19353,20130,22143,22154,28088,56212,59021,64143,66397,67951,68365,74551,103733,106572,110639,213990,215449,227613	Arf1,Rhoa,Eef1a1,Eef2,Ehd1,Gnai2,Rab18,Rab6a,Rab7,Rac1,Rras,Tuba1b,Tubb5,Rtcb,Rhog,Rab2a,Ralb,Sar1b,Tubb6,Rab14,Pck2,Tubg1,Rab31,Prps2,Agap3,Rap1b,Tubb4b
13_Member	GO Molecular Functions	GO:0003924	GTPase activity	-7.98829	-5.089	26/298	11848,13627,13629,14678,14688,14693,14701,14702,19330,19346,19349,19353,20130,22143,22154,56212,59021,64143,66397,67951,68365,103733,106572,213990,215449,227613	Rhoa,Eef1a1,Eef2,Gnai2,Gnb1,Gnb2,Gng12,Gng2,Rab18,Rab6a,Rab7,Rac1,Rras,Tuba1b,Tubb5,Rhog,Rab2a,Ralb,Sar1b,Tubb6,Rab14,Tubg1,Rab31,Agap3,Rap1b,Tubb4b
13_Member	GO Molecular Functions	GO:0001882	nucleoside binding	-6.52406	-4.02846	27/376	11840,11848,13627,13629,13660,14678,19330,19346,19349,19353,20130,22143,22154,28088,56212,59021,64143,66397,67951,68365,74551,103733,106572,110639,213990,215449,227613	Arf1,Rhoa,Eef1a1,Eef2,Ehd1,Gnai2,Rab18,Rab6a,Rab7,Rac1,Rras,Tuba1b,Tubb5,Rtcb,Rhog,Rab2a,Ralb,Sar1b,Tubb6,Rab14,Pck2,Tubg1,Rab31,Prps2,Agap3,Rap1b,Tubb4b
14_Summary	GO Molecular Functions	GO:0030246	carbohydrate binding	-5.62358	-3.34754	21/275	12330,13480,14376,14381,14387,14751,14936,16004,17158,17159,17534,18642,18822,26433,52858,66890,110006,110078,110173,110639,211548	Canx,Dpm1,Ganab,G6pdx,Gaa,Gpi1,Gys1,Igf2r,Man2a1,Man2b1,Mrc2,Pfkm,Plod1,Plod3,Cdipt,Lman2,Gusb,Pygb,Manba,Prps2,Nomo1
14_Member	GO Molecular Functions	GO:0030246	carbohydrate binding	-5.62358	-3.34754	21/275	12330,13480,14376,14381,14387,14751,14936,16004,17158,17159,17534,18642,18822,26433,52858,66890,110006,110078,110173,110639,211548	Canx,Dpm1,Ganab,G6pdx,Gaa,Gpi1,Gys1,Igf2r,Man2a1,Man2b1,Mrc2,Pfkm,Plod1,Plod3,Cdipt,Lman2,Gusb,Pygb,Manba,Prps2,Nomo1
14_Member	GO Molecular Functions	GO:0048029	monosaccharide binding	-5.3273	-3.10622	11/85	13480,14381,14751,14936,16004,17159,18642,18822,26433,66890,110173	Dpm1,G6pdx,Gpi1,Gys1,Igf2r,Man2b1,Pfkm,Plod1,Plod3,Lman2,Manba
14_Member	GO Molecular Functions	GO:0005537	mannose binding	-3.60137	-1.76903	5/25	13480,16004,17159,66890,110173	Dpm1,Igf2r,Man2b1,Lman2,Manba
15_Summary	GO Molecular Functions	GO:0051117	ATPase binding	-5.5006	-3.2513	12/98	19346,19353,21871,22393,27060,64143,66861,67819,74117,76709,217365,386649	Rab6a,Rac1,Atp6v0a2,Wfs1,Tcirg1,Ralb,Dnajc10,Derl1,Actr3,Arpc2,Nploc4,Nsfl1c
15_Member	GO Molecular Functions	GO:0051117	ATPase binding	-5.5006	-3.2513	12/98	19346,19353,21871,22393,27060,64143,66861,67819,74117,76709,217365,386649	Rab6a,Rac1,Atp6v0a2,Wfs1,Tcirg1,Ralb,Dnajc10,Derl1,Actr3,Arpc2,Nploc4,Nsfl1c
16_Summary	Reactome Gene Sets	R-MMU-9013407	RHOH GTPase cycle	-5.12126	-2.93518	7/32	13830,19349,22143,56320,192662,269523,386649	Stom,Rab7,Tuba1b,Dbn1,Arhgdia,Vcp,Nsfl1c
16_Member	Reactome Gene Sets	R-MMU-9013407	RHOH GTPase cycle	-5.12126	-2.93518	7/32	13830,19349,22143,56320,192662,269523,386649	Stom,Rab7,Tuba1b,Dbn1,Arhgdia,Vcp,Nsfl1c
17_Summary	GO Biological Processes	GO:1903034	regulation of response to wounding	-4.9211	-2.77768	15/170	11465,11475,11747,12306,12361,12740,12928,14083,14824,16001,16971,19268,68585,192176,223650,11774,12367,13361,16779,18810,72461,77579,109620	Actg1,Acta2,Anxa5,Anxa2,Cask,Cldn4,Crk,Ptk2,Grn,Igf1r,Lrp1,Ptprf,Rtn4,Flna,Eppk1,Ap3b1,Casp3,Dhfr,Lamb2,Plec,Prcp,Myh10,Dsp
17_Member	GO Biological Processes	GO:1903034	regulation of response to wounding	-4.9211	-2.77768	15/170	11465,11475,11747,12306,12361,12740,12928,14083,14824,16001,16971,19268,68585,192176,223650	Actg1,Acta2,Anxa5,Anxa2,Cask,Cldn4,Crk,Ptk2,Grn,Igf1r,Lrp1,Ptprf,Rtn4,Flna,Eppk1
17_Member	GO Biological Processes	GO:0009611	response to wounding	-2.67454	-1.07917	23/507	11465,11475,11747,11774,12306,12361,12367,12740,12928,13361,14083,14824,16001,16779,16971,18810,19268,68585,72461,77579,109620,192176,223650	Actg1,Acta2,Anxa5,Ap3b1,Anxa2,Cask,Casp3,Cldn4,Crk,Dhfr,Ptk2,Grn,Igf1r,Lamb2,Lrp1,Plec,Ptprf,Rtn4,Prcp,Myh10,Dsp,Flna,Eppk1
17_Member	GO Biological Processes	GO:0061041	regulation of wound healing	-2.46668	-0.943599	9/129	11465,11475,11747,12306,12361,12740,12928,14083,223650	Actg1,Acta2,Anxa5,Anxa2,Cask,Cldn4,Crk,Ptk2,Eppk1
18_Summary	GO Molecular Functions	GO:0043021	ribonucleoprotein complex binding	-4.90917	-2.76948	14/150	13629,14828,22384,53421,56347,56384,56449,56463,66212,66525,67819,68879,224727,224742	Eef2,Hspa5,Eif4h,Sec61a1,Eif3c,Letm1,Ybx3,Snd1,Sec61b,Timm50,Derl1,Prpf6,Bag6,Abcf1
18_Member	GO Molecular Functions	GO:0043021	ribonucleoprotein complex binding	-4.90917	-2.76948	14/150	13629,14828,22384,53421,56347,56384,56449,56463,66212,66525,67819,68879,224727,224742	Eef2,Hspa5,Eif4h,Sec61a1,Eif3c,Letm1,Ybx3,Snd1,Sec61b,Timm50,Derl1,Prpf6,Bag6,Abcf1
18_Member	GO Molecular Functions	GO:0043022	ribosome binding	-4.01711	-2.0922	8/62	13629,14828,53421,56347,56384,66212,224727,224742	Eef2,Hspa5,Sec61a1,Eif3c,Letm1,Sec61b,Bag6,Abcf1
19_Summary	GO Biological Processes	GO:0007163	establishment or maintenance of cell polarity	-4.63161	-2.54075	17/224	11848,12928,13191,14086,14252,15194,16001,16202,16897,17698,19353,27060,56212,74117,78885,215449,386649	Rhoa,Crk,Dctn1,Fscn1,Flot2,Htt,Igf1r,Ilk,Llgl1,Msn,Rac1,Tcirg1,Rhog,Actr3,Coro7,Rap1b,Nsfl1c
19_Member	GO Biological Processes	GO:0007163	establishment or maintenance of cell polarity	-4.63161	-2.54075	17/224	11848,12928,13191,14086,14252,15194,16001,16202,16897,17698,19353,27060,56212,74117,78885,215449,386649	Rhoa,Crk,Dctn1,Fscn1,Flot2,Htt,Igf1r,Ilk,Llgl1,Msn,Rac1,Tcirg1,Rhog,Actr3,Coro7,Rap1b,Nsfl1c
19_Member	GO Biological Processes	GO:0030010	establishment of cell polarity	-4.32288	-2.31195	13/148	11848,12928,13191,14086,14252,15194,16001,16897,17698,27060,78885,215449,386649	Rhoa,Crk,Dctn1,Fscn1,Flot2,Htt,Igf1r,Llgl1,Msn,Tcirg1,Coro7,Rap1b,Nsfl1c
19_Member	GO Biological Processes	GO:0051653	spindle localization	-2.00242	-0.605097	5/56	13191,15194,16897,74117,386649	Dctn1,Htt,Llgl1,Actr3,Nsfl1c
20_Summary	Reactome Gene Sets	R-MMU-71291	Metabolism of amino acids and derivatives	-4.60838	-2.52863	18/248	14085,14719,15473,19170,20539,20810,27376,66071,66194,67151,67824,69077,78920,93747,108682,109900,235339,236539,51793,51797,15108,15194,26433,246277,22321,104458	Fah,Got2,Rida,Psmb1,Slc7a5,Srm,Slc25a10,Ethe1,Pycrl,Psmd9,Nmral1,Psmd11,Dlst,Echs1,Gpt2,Asl,Dlat,Phgdh,Ddah2,Ctps,Hsd17b10,Htt,Plod3,Csad,Vars,Rars
20_Member	Reactome Gene Sets	R-MMU-71291	Metabolism of amino acids and derivatives	-4.60838	-2.52863	18/248	14085,14719,15473,19170,20539,20810,27376,66071,66194,67151,67824,69077,78920,93747,108682,109900,235339,236539	Fah,Got2,Rida,Psmb1,Slc7a5,Srm,Slc25a10,Ethe1,Pycrl,Psmd9,Nmral1,Psmd11,Dlst,Echs1,Gpt2,Asl,Dlat,Phgdh
20_Member	GO Biological Processes	GO:0009064	glutamine family amino acid metabolic process	-3.09475	-1.3773	7/65	14085,14719,51793,51797,66194,109900,236539	Fah,Got2,Ddah2,Ctps,Pycrl,Asl,Phgdh
20_Member	GO Biological Processes	GO:1901605	alpha-amino acid metabolic process	-3.08946	-1.37296	12/173	14085,14719,15108,15194,26433,51793,51797,66194,108682,109900,236539,246277	Fah,Got2,Hsd17b10,Htt,Plod3,Ddah2,Ctps,Pycrl,Gpt2,Asl,Phgdh,Csad
20_Member	GO Biological Processes	GO:0006520	cellular amino acid metabolic process	-2.6925	-1.09568	14/245	14085,14719,15108,15194,22321,26433,51793,51797,66194,104458,108682,109900,236539,246277	Fah,Got2,Hsd17b10,Htt,Vars,Plod3,Ddah2,Ctps,Pycrl,Rars,Gpt2,Asl,Phgdh,Csad
20_Member	GO Biological Processes	GO:0006525	arginine metabolic process	-2.02725	-0.626265	3/19	14085,51793,109900	Fah,Ddah2,Asl
20_Member	GO Biological Processes	GO:0008652	cellular amino acid biosynthetic process	-2.00242	-0.605097	5/56	14719,26433,66194,109900,236539	Got2,Plod3,Pycrl,Asl,Phgdh
