# Supplementary material for: Epigenetic mechanisms of Strip2 in differentiation of pluripotent stem cells
Source: Cell Death Discov. 2022 Nov 5;8:447. doi: 10.1038/s41420-022-01237-5 (PMC9637104; doi:10.1038/s41420-022-01237-5)
Supplement: Supplementary file 17 — Table S8 [file 41420_2022_1237_MOESM17_ESM.xlsx]

## Sheet: Sheet1
Antibody	Catalog No	Company
STRIP2 Polyclonal antibody	25163-1-AP	Proteintech
ZFP57 Monoclonal Antibody (OTI1E2), TrueMAB™	CF811579	ThermoFisher
TRIM28 Monoclonal Antibody (20C1)	MA1-2023	ThermoFisher
